# Supplementary material for: Role of SPI-1 Secreted Effectors in Acute Bovine Response to Salmonella enterica Serovar Typhimurium: A Systems Biology Analysis Approach
Source: PLoS One. 2011 Nov 11;6(11):e26869. doi: 10.1371/journal.pone.0026869 (PMC3214023; doi:10.1371/journal.pone.0026869)
Supplement: Table S3 — Detailed gene list for Table 2 Summary of significant genes determined by t test using cutoff p value ≤0.05 and |fold-change| ≥1.5 in response to infection with wild type Salmonella Typhimurium or an isogenic Δ sipA , sopABDE2 mutant. UI = Uninfected control loops inoculated with Luria-Bertani broth. WT = Wild type inoculated loop versus uninfected control loops. MUT = ΔsipA, sopABDE2 mutant inoculated loops versus uninfected control loops. (XLSX) [file pone.0026869.s003.xlsx]

## Sheet: S2_Fold_Change
S3 Fold Change for All Genes
Legend
WT= Changes in gene expression in bovine ligated ileal loops inoculated with wild type Salmonella enterica serotype Typhimurium versus loops inoculated with Luria-Bertani broth as a negative control
MUT= Changes in gene expression in bovine ligated ileal loops inoculated with a ΔsipA, sopABDE2 mutant Salmonella enterica serotype Typhimurium versus loops inoculated with Luria-Bertani broth as a negative control
WvM= Changes in gene expression in bovine ligated ileal loops inoculated with wild type Salmonella enterica serotype Typhimurium versus loops inoculated with a ΔsipA, sopABDE2 mutant Salmonella enterica serotype Typhimurium versus loops inoculated with Luria-Bertani broth as a negative control
t=Time in minutes; Max_Score=the maximum z-score at any time; Probe=NCBI gene number; Spot_Quality provides information on questionable (?) spots listed by time in minutes
Number	Symbol WT	Description WT	t=15 WT	t=30 WT	t=60 WT	t=120 WT	t=240 WT	t=480 WT	t=720 WT	Max_Score WT	Probe WT	Spot_Quality WT		Symbol MUT	Description MUT	t=15 MUT	t=30 MUT	t=60 MUT	t=120 MUT	t=240 MUT	t=480 MUT	t=720 MUT	Max_Score MUT	Probe MUT	Spot_Quality MUT		Symbol WvM	Description WvM	t=15 WvM	t=30 WvM	t=60 WvM	t=120 WvM	t=240 WvM	t=480 WvM	Max_Score WvM	Probe WvM	Spot_Quality WvM
1	F9	coagulation factor IX (plasma thromboplastic component, Christmas disease, hemophilia B)	1.02	1.01	1.13	1.3	-1.15	1.01	1.12	1.3	A34676			F9	coagulation factor IX (plasma thromboplastic component, Christmas disease, hemophilia B)	1.31	-1.16	-1.08	1.63	-1.05	1.14	1.45	1.63	A34676			F9	coagulation factor IX (plasma thromboplastic component, Christmas disease, hemophilia B)	-1.09	1.42	1.27	-1.01	1.14	-1.01	1.42	A34676
2	LOC652614	similar to HLA class I histocompatibility antigen, A-11 alpha chain precursor (MHC class I antigen A*11)	-1.29	-1.33	-3.86	-1.86	-1.48	-1.43	-1.12	-3.86	AB008612			LOC652614	similar to HLA class I histocompatibility antigen, A-11 alpha chain precursor (MHC class I antigen A*11)	1.05	2.2	-1.51	-1.78	-1.52	-1.34	-1.41	2.2	AB008612			LOC652614	similar to HLA class I histocompatibility antigen, A-11 alpha chain precursor (MHC class I antigen A*11)	1.03	-2.38	-2.04	1.3	1.24	-1.03	-2.38	AB008612
3	CD6	CD6 molecule	1.07	1.08	-1.15	-1.02	1.12	1.13	-1.19	-1.19	AB042274			CD6	CD6 molecule	1.02	1.13	1.03	1.07	1.16	1.04	1.01	1.16	AB042274	t15? t240? t480?		CD6	CD6 molecule	1.21	1.01	-1.11	1.08	1.06	1.11	1.21	AB042274	t60? t480?
4	MyoD1	myogenic differentiation 1	-1.06	1.28	-1.59	-1.16	1.08	-1.1	-1.05	-1.59	AB110599	t15? t30? t60? t120? t240? t480?		MyoD1	myogenic differentiation 1	1.02	1.32	-1.14	-1.07	1.05	-1.23	-1.19	1.32	AB110599	t30? t60? t240? t480? t720?		MyoD1	myogenic differentiation 1	1.09	-1.1	-1.35	1.03	1.27	1.18	-1.35	AB110599	t15? t60? t120? t480?
5	HGF	hepatocyte growth factor (hepapoietin A; scatter factor)	-1.16	-1.05	-1.04	-1.05	1.05	-1.11	1.16	1.16	AB110822	t240?		HGF	hepatocyte growth factor (hepapoietin A; scatter factor)	1	-1.03	1.03	-1	1.14	-1.07	1.06	1.14	AB110822	t15? t30? t60? t120? t240? t480? t720?		HGF	hepatocyte growth factor (hepapoietin A; scatter factor)	1.09	1.06	-1.02	1.05	1.03	1.04	1.09	AB110822	t15? t30? t60? t120? t240? t480?
6	Kcnn2	potassium intermediate/small conductance calcium-activated channel, subfamily N, member 2	1.01	-1.06	-1.02	1.1	-1.03	-1.01	1.1	1.1	AB114473	t15? t30? t60? t120? t240? t480? t720?		Kcnn2	potassium intermediate/small conductance calcium-activated channel, subfamily N, member 2	1.09	-1.11	1.04	1.04	1.01	1.05	1.04	-1.11	AB114473	t15? t30? t60? t120? t240? t480? t720?		Kcnn2	potassium intermediate/small conductance calcium-activated channel, subfamily N, member 2	1.06	1.17	-1.01	1.1	1.05	1.05	1.17	AB114473	t30? t60? t120? t240? t480?
7	Cdh10	cadherin 10, type 2 (T2-cadherin) (CDH10)	-1.07	-1.08	-1.14	1.04	-1.09	1	1.08	-1.14	AF013084	t60? t120? t240? t480? t720?		Cdh10	cadherin 10, type 2 (T2-cadherin) (CDH10)	1.04	1.08	1.09	1.1	-1.08	1	1.24	1.24	AF013084	t15? t30? t60? t120? t240? t480? t720?		Cdh10	cadherin 10, type 2 (T2-cadherin) (CDH10)	-1	-1.06	-1.23	-1.07	1.08	1.08	-1.23	AF013084	t30? t60? t120? t240? t480?
8	Pga5	pepsinogen 5, group I	1.32	-1.03	1.1	1.24	-1.19	-1.05	1.28	1.32	AF020507	t720?		Pga5	pepsinogen 5, group I	1.33	1.05	1.08	1.22	-1.14	1.07	1.32	1.33	AF020507	t15? t60? t120? t240? t480?		Pga5	pepsinogen 5, group I	1.04	1.03	1.04	1.09	1.13	-1.06	1.13	AF020507	t60? t120? t480?
9	PGA3		1.1	-1	-1.05	1.14	-1.13	1.1	-1.03	1.14	AF020509			PGA3		1.13	-1.11	1.09	1.2	-1.18	1.1	1.28	1.28	AF020509	t15? t120? t240? t480?		PGA3		1.05	1.21	-1.11	1.03	1.19	1.06	1.21	AF020509	t60? t120? t480?
10	SMN1	survival of motor neuron 1, telomeric	-1.11	1.03	-1.12	-1.06	-1.02	1.03	-1.04	-1.12	AF035323			SMN1	survival of motor neuron 1, telomeric	1.04	1.08	1.07	1.11	1.13	1.07	-1.15	-1.15	AF035323	t15? t120? t240? t480?		SMN1	survival of motor neuron 1, telomeric	-1.11	1.05	-1.02	1.06	-1.09	-1.01	-1.11	AF035323	t15? t60? t120? t480?
11	ALPI	alkaline phosphatase, intestinal	-1.14	1.21	-1.26	1.07	-1.12	-1.06	-1.28	-1.28	AF052227	t15?		ALPI	alkaline phosphatase, intestinal	1.14	1.4	1.44	1.1	-1.31	-1.06	1.72	1.72	AF052227	t720?		ALPI	alkaline phosphatase, intestinal	-1.11	1.06	-1.46	1.26	1.43	1.03	-1.46	AF052227
12	Gapdh	glyceraldehyde-3-phosphate dehydrogenase (EC:1.2.1.12)	1.16	1.1	1.04	1.04	-1.09	-1.17	1.01	-1.17	AF077815	t15? t30? t120? t480?		Gapdh	glyceraldehyde-3-phosphate dehydrogenase (EC:1.2.1.12)	1.39	1.28	1.31	1.1	-1.04	-1.19	1.03	1.39	AF077815	t120? t480?		Gapdh	glyceraldehyde-3-phosphate dehydrogenase (EC:1.2.1.12)	1.06	-1.01	-1.03	1.21	1.16	1.04	1.21	AF077815	t30? t60?
13	IL4R	interleukin 4 receptor	-1.08	1.11	-1.36	-1.11	-1.1	1.09	-1.06	-1.36	AF081273			IL4R	interleukin 4 receptor	-1.2	1.5	-1.01	-1	1.01	-1.01	1.33	1.5	AF081273	t240?		IL4R	interleukin 4 receptor	1.28	-1.4	-1.15	1.02	1.08	1.11	-1.4	AF081273	t15? t30? t120? t480?
14	Adam2	a disintegrin and metallopeptidase domain 2	1.07	-1.02	-1.01	1.02	-1.12	1.1	-1.01	-1.12	AF086808			Adam2	a disintegrin and metallopeptidase domain 2	1.22	-1	1.1	1.07	-1.16	1.12	1.23	1.23	AF086808	t15? t30? t60? t120? t240? t480?		Adam2	a disintegrin and metallopeptidase domain 2	1.01	1.05	-1.04	-1.02	1.17	1.07	1.17	AF086808	t30? t60? t120? t480?
15	Akap3	A kinase (PRKA) anchor protein 3	-1.04	-1.05	1.04	-1.03	-1.03	-1.14	1.02	-1.14	AF093407	t240? t480? t720?		Akap3	A kinase (PRKA) anchor protein 3	-1	1.25	1.04	1.04	1.05	1.01	1.08	1.25	AF093407	t15? t30? t60? t120? t240? t480? t720?		Akap3	A kinase (PRKA) anchor protein 3	1.05	1.09	1.03	-1.05	1.09	-1.02	1.09	AF093407	t15? t30? t60? t120? t240? t480?
16	PHB2		1.16	1.05	1.71	1.51	1.04	1.12	1.47	1.71	AF093739			PHB2		1.39	-1.16	1.21	1.31	1.32	1.16	2.78	2.78	AF093739	t720?		PHB2		1.3	1.46	1.77	1.61	-1.07	1.02	1.77	AF093739
17	ALOX15B	arachidonate 15-lipoxygenase, type B	-1.16	1.22	-1.16	1.06	1.27	1.06	-1.22	1.27	AF107263			ALOX15B	arachidonate 15-lipoxygenase, type B	1.4	1.27	1.34	1.01	1.29	-1.29	-1.36	1.4	AF107263			ALOX15B	arachidonate 15-lipoxygenase, type B	-1.68	1.14	-1.23	1.46	1.09	1.13	-1.68	AF107263
18	Lphn1	latrophilin 1	1	-1.02	1.11	1.17	1.08	-1.22	-1.06	-1.22	AF111098	t15? t30? t60? t120? t240? t480? t720?		Lphn1	latrophilin 1	-1.01	1.06	1.18	-1.12	-1.08	-1.14	1.17	1.18	AF111098	t15? t60? t120? t240? t480? t720?		Lphn1	latrophilin 1	1.45	1.05	1.04	1.34	1.43	-1.05	1.45	AF111098	t15? t60? t120? t240? t480?
19	MMP3	matrix metallopeptidase 3 (stromelysin 1, progelatinase) (EC:3.4.24.17)	1.03	-1.09	1.1	-1.3	-1.1	1.34	1.42	1.42	AF135232			MMP3	matrix metallopeptidase 3 (stromelysin 1, progelatinase) (EC:3.4.24.17)	-1.04	1.24	-1.01	-1.47	1.14	1.18	1.16	-1.47	AF135232			MMP3	matrix metallopeptidase 3 (stromelysin 1, progelatinase) (EC:3.4.24.17)	1.14	-1.11	1.37	1.51	-1.03	1.17	1.51	AF135232
20	FCER2	Fc fragment of IgE, low affinity II, receptor for (CD23)	1.01	-1.14	1.17	-1.06	-1.16	1.24	1.01	1.24	AF143722			FCER2	Fc fragment of IgE, low affinity II, receptor for (CD23)	-1.11	1.04	-1.04	1.06	1.06	1.17	1.63	1.63	AF143722	t15?		FCER2	Fc fragment of IgE, low affinity II, receptor for (CD23)	1.13	-1.04	1.24	1.01	-1.06	1.11	1.24	AF143722	t60? t120?
21	PAG14		1.05	-1.03	-1.1	-1.07	1.07	-1.04	1.04	-1.1	AF192331	t15? t120? t240? t480? t720?		PAG14		-1.02	1.12	-1.02	-1.06	1.21	-1.07	-1.04	1.21	AF192331	t15? t30? t60? t120? t240? t480? t720?		PAG14		1.83	-1.06	-1.07	1.02	1.04	1.11	1.83	AF192331	t15? t30? t60? t120? t240? t480?
22	PAG21		-1.09	1.06	-1.09	-1.03	-1.06	-1.04	-1	-1.09	AF192337	t240? t480? t720?		PAG21		1.04	1.15	-1.01	1.01	1.05	1.03	1.04	1.15	AF192337	t15? t30? t60? t120? t240? t480? t720?		PAG21		1.02	1.05	-1.04	-1	1.01	1.05	1.05	AF192337	t15? t30? t60? t120? t240? t480?
23	ITGB3	integrin, beta 3 (platelet glycoprotein IIIa, antigen CD61)	-1.1	1.11	-1.39	-1.2	1.18	1.01	-1.27	-1.39	AF239959	t240? t480?		ITGB3	integrin, beta 3 (platelet glycoprotein IIIa, antigen CD61)	1.26	1.17	-1.04	-1.14	1.18	-1.01	1.04	1.26	AF239959	t15? t480?		ITGB3	integrin, beta 3 (platelet glycoprotein IIIa, antigen CD61)	-1.07	1.02	-1.13	1.14	1.1	1.01	1.14	AF239959	t15? t480?
24	TAX		1.09	1.07	-1.31	1.01	1.12	-1.03	-1.66	-1.66	AF257515			TAX		1.34	1.13	1.12	1.26	1.01	1.01	-1.15	1.34	AF257515			TAX		-1	1.13	-1.33	-1.05	1.38	1.03	1.38	AF257515
25	KLRD1	killer cell lectin-like receptor subfamily D, member 1	-1.06	-1.04	1.07	1.26	-1.27	1.15	1.1	-1.27	AF422180			KLRD1	killer cell lectin-like receptor subfamily D, member 1	1.22	-1.08	1.13	1.55	-1.19	1.18	1.31	1.55	AF422180			KLRD1	killer cell lectin-like receptor subfamily D, member 1	-1	1.19	1.12	-1	1.12	1.05	1.19	AF422180
26	KIR3DL1	killer cell immunoglobulin-like receptor, three domains, long cytoplasmic tail, 1	1.05	1.02	1.02	-1.01	-1.17	-1.11	1.1	-1.17	AF490401	t15? t30? t60? t120? t240? t720?		KIR3DL1	killer cell immunoglobulin-like receptor, three domains, long cytoplasmic tail, 1	-1.04	1.06	-1.07	1.02	1.08	-1.04	1.38	1.38	AF490401	t15? t30? t240? t480?		KIR3DL1	killer cell immunoglobulin-like receptor, three domains, long cytoplasmic tail, 1	1.24	-1.03	1.04	-1.05	-1.13	-1	1.24	AF490401	t30? t60? t120? t240? t480?
27	env		1.36	-1.13	1.45	1	-1.17	1.05	-1.18	1.45	AF503581			env		1.14	-1.03	-1.07	1.1	1.11	1.23	1.09	1.23	AF503581			env		1.29	1.04	1.4	1.09	-1.11	-1.03	1.4	AF503581
28	OFCC1		-1.09	-1.02	-1.03	1.01	-1.13	-1.05	1.18	1.18	AF548109	t240? t480? t720?		OFCC1		1.03	1.01	1.04	1.02	-1.11	-1.01	1.22	1.22	AF548109	t15? t30? t60? t120? t240? t480? t720?		OFCC1		1.07	1.11	-1.05	1.01	1.1	1.07	1.11	AF548109	t30? t60? t120? t240? t480?
29	RBS1		-1.02	-1.03	-1.02	-1.03	1.08	1.04	-1	1.08	AI495218	t15? t30? t60? t120? t240? t480? t720?		RBS1		1.03	1.09	-1.03	-1.01	1.02	1.02	-1.01	1.09	AI495218	t15? t30? t60? t120? t240? t480? t720?		RBS1		1.16	-1.01	1.02	1.03	1.14	1.09	1.16	AI495218	t15? t30? t60? t120? t240? t480?
30	CYP2E1	cytochrome P450, family 2, subfamily E, polypeptide 1	-1.05	-1.02	1.02	1.06	1.01	1.02	1.07	1.07	AJ001715	t480? t720?		CYP2E1	cytochrome P450, family 2, subfamily E, polypeptide 1	1.07	1.01	1.06	1.04	-1.03	1.04	1.21	1.21	AJ001715	t15? t30? t60? t120? t240? t480? t720?		CYP2E1	cytochrome P450, family 2, subfamily E, polypeptide 1	1.04	1.08	1	1.03	1.14	1.08	1.14	AJ001715	t30? t60? t120? t240? t480?
31	FGFR1	fibroblast growth factor receptor 1 (fms-related tyrosine kinase 2, Pfeiffer syndrome)	1.1	-1.05	-1.13	-1.11	-1.03	-1.37	-1.5	-1.5	AJ004952			FGFR1	fibroblast growth factor receptor 1 (fms-related tyrosine kinase 2, Pfeiffer syndrome)	1.35	1.14	1.1	-1.1	-1.14	-1.27	1.45	1.45	AJ004952			FGFR1	fibroblast growth factor receptor 1 (fms-related tyrosine kinase 2, Pfeiffer syndrome)	-1.05	-1.01	1.01	1.21	1.35	-1.06	1.35	AJ004952
32	Slc34a1	solute carrier family 34 (sodium phosphate), member 1	-1.01	1.07	1.01	1.03	1.18	-1.11	-1.16	1.18	AJ224334			Slc34a1	solute carrier family 34 (sodium phosphate), member 1	-1.11	-1.05	1.18	1.11	1	1.05	1.04	1.18	AJ224334	t15? t30? t60? t120? t240? t480?		Slc34a1	solute carrier family 34 (sodium phosphate), member 1	1.45	1.2	-1.09	1.07	1.3	-1.05	1.45	AJ224334	t15? t30? t60? t120? t240? t480?
33	Trpc4	transient receptor potential cation channel, subfamily C, member 4	1.03	-1.03	-1.03	1.16	-1.2	-1.13	-1.45	-1.45	AJ224862			Trpc4	transient receptor potential cation channel, subfamily C, member 4	1.23	-1.08	1.28	1.26	-1.1	-1.03	-1.02	1.28	AJ224862			Trpc4	transient receptor potential cation channel, subfamily C, member 4	1.1	1.27	-1.17	1.1	1.19	-1.03	1.27	AJ224862
34	MSG	metastic suppressing gene	1.03	1.06	-1.05	-1.05	-1.01	-1.07	1.06	-1.07	AJ239127	t15? t30? t60? t120? t240? t480? t720?		MSG	metastic suppressing gene	1.04	1.18	-1.06	-1.01	1.05	-1.03	1.03	1.18	AJ239127	t15? t30? t60? t120? t240? t480? t720?		MSG	metastic suppressing gene	1.2	-1.06	1	-1	1.07	1.05	1.2	AJ239127	t15? t30? t60? t120? t240? t480?
35	CD86	CD86 molecule	-1.01	-1	-1.42	-1.19	1.37	1	1.01	-1.42	AJ291475	t60?		CD86	CD86 molecule	1.03	1.28	-1.08	1.27	-1.01	1.17	-1.5	-1.5	AJ291475	t60? t720?		CD86	CD86 molecule	-1.08	-1.19	-1.08	-1.14	1.49	-1.08	1.49	AJ291475
36	Egr4	early growth response 4	1.32	1.23	1.18	1.26	-1.07	-1.07	-1.28	1.32	AJ293900	t15?		Egr4	early growth response 4	-1.04	1.13	1.15	1.31	1.06	1.02	1.19	1.31	AJ293900			Egr4	early growth response 4	1.36	1.32	1.17	1.11	1.01	-1.08	1.36	AJ293900
37	LOC668400		-1.3	1.45	-3.47	-1.43	-1.22	1.69	-1.09	-3.47	AJ512824			LOC668400		1.31	2.44	-1.12	1.1	-1.46	1.2	1.01	2.44	AJ512824			LOC668400		-1.64	-1.37	-2.36	-1.18	1.48	1.47	-2.36	AJ512824
38	CR2	complement component (3d/Epstein Barr virus) receptor 2	1.02	1.61	-1.13	1.03	-1.12	1.8	1.75	1.8	AJ535317	t720?		CR2	complement component (3d/Epstein Barr virus) receptor 2	1.34	2.07	1.2	1.71	-1.77	1.78	-1.49	2.07	AJ535317	t30? t240? t720?		CR2	complement component (3d/Epstein Barr virus) receptor 2	1.19	-1.16	1.04	-1.14	1.97	1.06	1.97	AJ535317	t30?
39	CD4	CD4 molecule	1.11	1.24	-1.09	-1.16	1.29	1.12	-1.3	-1.3	AJ535319			CD4	CD4 molecule	1.24	1.15	1.2	1.23	1.11	1.05	-1.08	1.24	AJ535319			CD4	CD4 molecule	1.03	1.3	-1.01	-1.1	1.44	1.11	1.44	AJ535319
40	ITGAM	integrin, alpha M (complement component 3 receptor 3 subunit)	-1.13	1.09	-1.52	-1.22	-1.08	-1.03	-1.17	-1.52	AJ535320	t240? t480?		ITGAM	integrin, alpha M (complement component 3 receptor 3 subunit)	1.07	1.49	-1.12	-1.23	1.08	-1.2	-1.38	1.49	AJ535320	t15? t240? t480? t720?		ITGAM	integrin, alpha M (complement component 3 receptor 3 subunit)	-1.2	-1.31	-1.21	1.15	-1.03	1.17	-1.31	AJ535320	t15? t60? t120? t240? t480?
41	Pofut2	protein O-fucosyltransferase 2	-1.15	-1.03	-1.17	-1.11	1.08	1.09	-1.1	-1.17	AJ575655	t15? t240?		Pofut2	protein O-fucosyltransferase 2	1.15	1.09	1.09	-1.05	1.3	1.01	-1.32	-1.32	AJ575655			Pofut2	protein O-fucosyltransferase 2	-1.3	-1.02	-1.02	1.17	-1.11	1.11	-1.3	AJ575655
42	Dhps		1.27	1	1.19	1.39	-1.23	1.1	1.31	1.39	AJ577610			Dhps		1.08	1.31	1.14	-1.11	1.03	-1.06	1.86	1.86	AJ577610	t120?		Dhps		1.41	-1.06	1.29	1.17	-1.04	1.21	1.41	AJ577610
43	HLA-DQB1	major histocompatibility complex, class II, DQ beta 1	1.23	1	1.36	1.16	-1.08	-1.16	1.29	1.36	AJ580584			HLA-DQB1	major histocompatibility complex, class II, DQ beta 1	1.27	-1.06	1.16	1.5	-1.02	1.1	1.84	1.84	AJ580584			HLA-DQB1	major histocompatibility complex, class II, DQ beta 1	1.18	1.27	1.22	1.03	1.11	-1.09	1.27	AJ580584
44	BECN1	beclin 1, autophagy related	-1.12	1.08	-1.29	1	-1.17	1.12	-1.07	-1.29	AJ669637			BECN1	beclin 1, autophagy related	1.04	-1.02	1.13	1.23	-1.01	1.08	1.16	1.23	AJ669637			BECN1	beclin 1, autophagy related	1.15	1.3	-1.1	1.08	1.12	1.04	1.3	AJ669637
45	Asxl2	additional sex combs like 2 (Drosophila)	-1.04	1.09	-1.23	-1.08	1.16	1.21	-1.43	-1.43	AJ670793			Asxl2	additional sex combs like 2 (Drosophila)	1.34	1.07	1.17	1.13	1.25	1.03	-1.17	1.34	AJ670793			Asxl2	additional sex combs like 2 (Drosophila)	-1.29	1.14	-1.12	1.02	-1.01	1.22	-1.29	AJ670793
46	Lars	leucyl-tRNA synthetase	1.08	1.23	1.08	1.13	-1.15	1.01	1.16	1.23	AJ671233	t120? t240?		Lars	leucyl-tRNA synthetase	1.1	1.08	1.02	1.25	-1.02	1.03	1.18	1.25	AJ671233	t720?		Lars	leucyl-tRNA synthetase	-1.04	1.2	1.16	1.06	1.03	-1.05	1.2	AJ671233
47	FEZ1	fasciculation and elongation protein zeta 1 (zygin I)	1.12	-1.49	1.35	1.08	1.08	-1.36	1.25	-1.49	AJ671670	t15? t30? t60? t120? t240? t480?		FEZ1	fasciculation and elongation protein zeta 1 (zygin I)	-1.07	-1.47	1.05	-1.24	2.25	-1.36	1.52	2.25	AJ671670	t15? t30? t60? t120? t240?		FEZ1	fasciculation and elongation protein zeta 1 (zygin I)	1.29	1.02	1.4	1.48	-1.69	1.03	-1.69	AJ671670	t30? t60? t120? t240? t480?
48	SERPINB8	serpin peptidase inhibitor, clade B (ovalbumin), member 8	1.1	-1.05	1.23	1.06	-1.07	1.33	1.56	1.56	AJ671953	t15? t30? t60? t120? t240? t720?		SERPINB8	serpin peptidase inhibitor, clade B (ovalbumin), member 8	-1.05	1.01	1.02	1.19	1.1	1.14	1.33	1.33	AJ671953	t60? t120? t240? t480? t720?		SERPINB8	serpin peptidase inhibitor, clade B (ovalbumin), member 8	1.15	-1.01	1.25	-1.07	-1.01	1.19	1.25	AJ671953	t30? t60? t120? t480?
49	Bcl2l14	Bcl2-like 14 (apoptosis facilitator)	-1.02	1.09	-1.15	-1.05	-1.08	-1.04	-1.04	-1.15	AJ673486	t15? t240? t480?		Bcl2l14	Bcl2-like 14 (apoptosis facilitator)	1.17	1.2	-1.03	1	1.07	-1.12	1.04	1.2	AJ673486	t15? t60? t240? t480?		Bcl2l14	Bcl2-like 14 (apoptosis facilitator)	-1.22	-1.08	-1.04	1.06	-1.03	1.09	-1.22	AJ673486	t30? t60? t120? t480?
50	CD55		-1.06	1.1	-1.07	-1.01	1.44	1.73	2.35	2.35	AJ674170	t15? t30? t60? t240? t480?		CD55		1.08	1.14	-1.01	1.01	1.16	1.19	1.1	1.19	AJ674170	t15? t60? t240? t480?		CD55		1.01	-1.02	1	1.09	1.25	1.39	1.39	AJ674170	t15? t60? t480?
51	Zdhhc13	zinc finger, DHHC domain containing 13	1.4	1.05	-1.12	-1.08	-1.06	1.1	-1.02	1.4	AJ674494	t720?		Zdhhc13	zinc finger, DHHC domain containing 13	1.24	1.18	1.13	1.13	1.09	1.1	1.12	1.24	AJ674494			Zdhhc13	zinc finger, DHHC domain containing 13	1.12	-1	-1.12	-1.03	-1.01	1.03	1.12	AJ674494	t480?
52	Pcolce2	procollagen C-endopeptidase enhancer 2	-1.05	1.01	1.09	-1.33	-1.29	-1.28	1.16	-1.33	AJ674495	t15?		Pcolce2	procollagen C-endopeptidase enhancer 2	1.05	1.27	-1.02	-1.4	-1.62	-1.16	-1.02	-1.62	AJ674495			Pcolce2	procollagen C-endopeptidase enhancer 2	1.06	-1.02	1.28	1.41	1.54	-1.06	1.54	AJ674495
53	BHLHB3	basic helix-loop-helix domain containing, class B, 3	1.05	1.01	1.04	1.08	-1.08	-1.05	-1.02	1.08	AJ675090			BHLHB3	basic helix-loop-helix domain containing, class B, 3	1.13	-1.03	1.23	-1.01	-1.04	-1.01	1.32	1.32	AJ675090	t15? t480?		BHLHB3	basic helix-loop-helix domain containing, class B, 3	1.14	1.15	-1.09	1.2	1.19	-1.01	1.2	AJ675090	t60? t120? t480?
54	Kif21a	kinesin family member 21A	1.03	-1.1	1.3	1.12	1.02	-1.02	1.02	1.3	AJ675902	t720?		Kif21a	kinesin family member 21A	1.1	-1.09	1.09	1.08	1.06	1.09	1.18	1.18	AJ675902	t15? t30? t60? t120? t240? t480?		Kif21a	kinesin family member 21A	1.08	1.09	1.23	1.1	1.04	-1.09	1.23	AJ675902	t30? t60? t120? t240? t480?
55	Gtf3c2	general transcription factor IIIC, polypeptide 2, beta	1.2	1.15	-1.28	-1.06	1.09	1.05	-1.17	-1.28	AJ676625	t15?		Gtf3c2	general transcription factor IIIC, polypeptide 2, beta	1.54	1.13	1.12	-1	1.15	1.07	-1.22	1.54	AJ676625	t15? t720?		Gtf3c2	general transcription factor IIIC, polypeptide 2, beta	-1.12	1.11	-1.19	1.15	1.07	1.03	-1.19	AJ676625	t480?
56	Rnf13	ring finger protein 13	1.29	1.1	-1.26	1.16	1.08	1.3	-1.07	1.3	AJ676720	t15?		Rnf13	ring finger protein 13	1.91	1.13	-1.05	1.44	1.09	1.04	1.02	1.91	AJ676720	t15?		Rnf13	ring finger protein 13	-1.12	1.11	1.1	1	1.08	1.21	1.21	AJ676720
57	MRE11A	MRE11 meiotic recombination 11 homolog A (S. cerevisiae)	-1.27	1.14	1.14	1.06	-1.1	1.11	-1.06	-1.27	AJ677808			MRE11A	MRE11 meiotic recombination 11 homolog A (S. cerevisiae)	-1.01	1.07	1.39	1.28	-1.14	1.16	1.03	1.39	AJ677808			MRE11A	MRE11 meiotic recombination 11 homolog A (S. cerevisiae)	-1.04	1.18	-1.02	-1.01	1.23	-1.04	1.23	AJ677808
58	Csad	cysteine sulfinic acid decarboxylase	1.25	1	1.21	1.15	-1.07	-1.03	-1.1	1.25	AJ678420	t15?		Csad	cysteine sulfinic acid decarboxylase	1.01	1.35	-1.03	-1.11	-1.02	-1.06	1.38	1.38	AJ678420			Csad	cysteine sulfinic acid decarboxylase	1.19	-1.14	1.32	1.42	1.12	1.08	1.42	AJ678420
59	LMO3		-1.09	1.05	-1.12	1.2	-1.11	-1.23	1.15	-1.23	AJ688089			LMO3		1.13	-1.16	1.34	1.67	-1.31	1.03	1.01	1.67	AJ688089	t15?		LMO3		-1.03	1.39	-1.21	-1.13	1.49	-1.16	1.49	AJ688089
60	KALRN		-1.22	-1.01	1.13	1.03	-1.02	-1.07	1.04	-1.22	AJ689610	t720?		KALRN		1.06	-1.27	1.02	1.12	1.01	1.05	1.03	-1.27	AJ689610	t30? t60? t120? t480? t720?		KALRN		-1.07	1.28	1.17	1.03	1.1	-1.02	1.28	AJ689610	t15? t30? t60? t120? t480?
61	Nup155	nucleoporin 155	1.07	1.14	1.08	1.04	-1.12	-1.16	1.1	-1.16	AJ689632	t15? t120? t240?		Nup155	nucleoporin 155	-1.18	1.14	1.02	1.06	1.02	-1.02	1.11	-1.18	AJ689632	t15?		Nup155	nucleoporin 155	1.21	1.05	1.12	1.09	-1	-1.12	1.21	AJ689632	t60? t120?
62	Kctd10	potassium channel tetramerisation domain containing 10	1.06	-1.03	-1.09	1.08	-1.19	-1.13	-1.17	-1.19	AJ689756			Kctd10	potassium channel tetramerisation domain containing 10	1.11	1.03	1.04	1.17	1.06	-1.06	1.01	1.17	AJ689756			Kctd10	potassium channel tetramerisation domain containing 10	1.14	1.08	-1	1.03	-1.05	-1.04	1.14	AJ689756	t15? t60? t480?
63	STT3B	STT3, subunit of the oligosaccharyltransferase complex, homolog B (S. cerevisiae) (EC:2.4.1.-)	1.1	1	-1.41	-1.18	-1.08	1.06	-1.47	-1.47	AJ689869			STT3B	STT3, subunit of the oligosaccharyltransferase complex, homolog B (S. cerevisiae) (EC:2.4.1.-)	1.57	1.41	1.06	-1.41	-1.03	-1.16	-1.2	1.57	AJ689869			STT3B	STT3, subunit of the oligosaccharyltransferase complex, homolog B (S. cerevisiae) (EC:2.4.1.-)	-1.3	-1.17	-1.06	1.5	1.18	1.18	1.5	AJ689869
64	Klhl13	kelch-like 13 (Drosophila)	-1.03	-1.04	1.08	1.04	1.02	-1.03	1.05	1.08	AJ690218	t15? t240? t720?		Klhl13	kelch-like 13 (Drosophila)	1.03	-1.21	1	1.03	-1.05	-1.01	1.19	-1.21	AJ690218	t15? t30? t60? t120? t240? t480? t720?		Klhl13	kelch-like 13 (Drosophila)	1.05	1.4	1.14	1.04	1.17	1.07	1.4	AJ690218	t30? t60? t120? t240? t480?
65	Anln	anillin, actin binding protein (scraps homolog, Drosophila)	1.02	-1.13	1.2	1.07	-1.19	-1.11	-1.15	1.2	AJ690321	t30? t240?		Anln	anillin, actin binding protein (scraps homolog, Drosophila)	-1.1	1.03	1.14	1.14	1.12	-1.05	-1.1	1.14	AJ690321	t15? t60? t480?		Anln	anillin, actin binding protein (scraps homolog, Drosophila)	1.13	-1.04	1.19	1.08	-1.19	-1.06	1.19	AJ690321	t480?
66	Cdc73	cell division cycle 73, Paf1/RNA polymerase II complex component, homolog (S. cerevisiae)	-1.08	1.01	1.09	-1.01	-1.17	1.03	-1.13	-1.17	AJ690519	t240? t720?		Cdc73	cell division cycle 73, Paf1/RNA polymerase II complex component, homolog (S. cerevisiae)	-1.01	1.2	1.02	-1.01	1.02	1.09	-1.26	-1.26	AJ690519	t15? t240? t480? t720?		Cdc73	cell division cycle 73, Paf1/RNA polymerase II complex component, homolog (S. cerevisiae)	-1.08	-1.08	1.16	1.13	-1.07	-1.05	1.16	AJ690519	t60? t120? t480?
67	Rspo3	R-spondin 3 homolog (Xenopus laevis)	1.03	-1.02	1.19	-1.02	-1.07	1.19	1.22	1.22	AJ691105	t720?		Rspo3	R-spondin 3 homolog (Xenopus laevis)	1.03	1.16	1.07	1.15	-1.01	1.13	1.08	1.16	AJ691105	t15? t60? t120? t240? t480? t720?		Rspo3	R-spondin 3 homolog (Xenopus laevis)	1.08	-1.07	1.11	-1.1	1.04	1.09	1.11	AJ691105	t15? t30? t60? t120? t240? t480?
68	ACSL3	acyl-CoA synthetase long-chain family member 3	-1.09	-1.13	-1.26	1.14	1.28	-1.22	-1.14	1.28	AJ691411	t15? t60?		ACSL3	acyl-CoA synthetase long-chain family member 3	-1.01	-1.08	1.1	1.12	1.24	-1.25	1.05	-1.25	AJ691411	t15? t480?		ACSL3	acyl-CoA synthetase long-chain family member 3	1.14	1.11	-1.18	1.14	1.16	-1.04	-1.18	AJ691411	t480?
69	Stip1	stress-induced phosphoprotein 1	1.2	-1.17	1.43	-1.18	1.06	-1.04	1.02	1.43	AJ691626	t30? t60? t240?		Stip1	stress-induced phosphoprotein 1	-1.05	1.03	1.08	-1.14	1.32	-1.01	1.15	1.32	AJ691626			Stip1	stress-induced phosphoprotein 1	1.45	-1.02	1.47	1.18	-1.08	-1.03	1.47	AJ691626
70	Cnot8	CCR4-NOT transcription complex, subunit 8	-1.04	1.16	-1.17	1.05	-1.09	-1.08	-1.08	-1.17	AJ692477			Cnot8	CCR4-NOT transcription complex, subunit 8	1.25	1.18	1.19	1.1	-1.01	-1.01	1.47	1.47	AJ692477			Cnot8	CCR4-NOT transcription complex, subunit 8	-1.09	1.09	-1.21	1.1	1.18	-1.07	-1.21	AJ692477
71	Creb3l2		1.03	1.01	1.14	-1.17	1.04	1.15	1.04	-1.17	AJ692736			Creb3l2		-1.03	1.05	-1.07	-1.08	1.25	1.11	1.11	1.25	AJ692736	t240? t480?		Creb3l2		1.05	1.01	1.26	1.06	-1.12	1.07	1.26	AJ692736	t60? t120?
72	Plekha5	pleckstrin homology domain containing, family A member 5	1.04	-1.03	1.29	-1.08	-1.17	-1.27	1.2	1.29	AJ693442	t15? t30? t60? t120? t240? t720?		Plekha5	pleckstrin homology domain containing, family A member 5	-1.18	-1.01	-1.04	-1.14	1.1	-1.13	1.24	1.24	AJ693442	t15? t60? t120? t240? t480?		Plekha5	pleckstrin homology domain containing, family A member 5	1.21	1.02	1.35	1.15	-1.13	-1.11	1.35	AJ693442	t60? t120? t240? t480?
73	MST150	MSTP150	1.22	-1.13	1.64	1.05	-1.19	1.31	1.06	1.64	AJ693643	t15? t30? t60?		MST150	MSTP150	1.23	1.08	1.29	1.2	1.32	1.28	1.31	1.32	AJ693643	t60?		MST150	MSTP150	1.1	-1.11	1.34	1.06	-1.31	1.05	1.34	AJ693643
74	F2R	coagulation factor II (thrombin) receptor	-1.11	1.01	-1.99	-1.18	1.46	1.35	1.23	-1.99	AJ693807	t30? t240?		F2R	coagulation factor II (thrombin) receptor	1.39	1.51	-1.15	-1.17	1.42	-1.03	-1.02	1.51	AJ693807			F2R	coagulation factor II (thrombin) receptor	-1.27	-1.38	-1.38	1.19	1.08	1.43	1.43	AJ693807
75	TCEAL1	transcription elongation factor A (SII)-like 1	-1.4	-1.16	1.14	1.08	1.07	1.13	1.23	-1.4	AJ694399			TCEAL1	transcription elongation factor A (SII)-like 1	-1.1	-1.02	1.1	1.23	1.06	1.17	1.14	1.23	AJ694399	t15? t60? t120? t240? t480?		TCEAL1	transcription elongation factor A (SII)-like 1	-1.17	-1.01	1.11	1	1.11	-1.02	-1.17	AJ694399	t15? t60? t120? t480?
76	RAB3IP	RAB3A interacting protein (rabin3)	1.13	-1.08	1.05	-1.42	1.18	1.03	1.83	1.83	AJ694668	t15? t240?		RAB3IP	RAB3A interacting protein (rabin3)	1.26	1.28	1.06	-1.44	1.08	-1.22	-1.07	-1.44	AJ694668	t15? t480?		RAB3IP	RAB3A interacting protein (rabin3)	-1	-1.28	1.09	1.2	1.23	1.33	1.33	AJ694668	t480?
77	Fez2		-1.01	1	-1.01	-1.33	-1.06	1.09	1.01	-1.33	AJ695300	t15? t240? t720?		Fez2		-1.04	1.1	-1.09	-1.17	1.07	1.06	1.04	-1.17	AJ695300			Fez2		1.02	-1.06	1.12	1.04	-1.03	1.08	1.12	AJ695300	t60? t120? t480?
78	DBP	D site of albumin promoter (albumin D-box) binding protein	1.08	-1.09	1.14	-1.02	-1.16	-1.23	-1.06	-1.23	AJ695428	t15? t30? t60? t120? t240? t720?		DBP	D site of albumin promoter (albumin D-box) binding protein	-1.12	-1.1	1.06	1.04	-1	-1.14	1.06	-1.14	AJ695428	t15? t60? t120? t240? t480?		DBP	D site of albumin promoter (albumin D-box) binding protein	1.24	1.09	1.08	1.04	-1.01	-1.05	1.24	AJ695428	t60? t120? t240? t480?
79	MYC	v-myc myelocytomatosis viral oncogene homolog (avian)	-1.03	1.03	1.01	-1.1	1.14	1.28	1.11	1.28	AJ695438			MYC	v-myc myelocytomatosis viral oncogene homolog (avian)	1.1	1.04	-1	-1.08	1.22	1.2	-1.16	1.22	AJ695438	t120?		MYC	v-myc myelocytomatosis viral oncogene homolog (avian)	-1.02	1.03	1.24	1.23	1.04	1.1	1.24	AJ695438
80	UNQ9217		-1.13	1	-1.23	-1.07	-1.03	-1	1.02	-1.23	AJ695499	t480?		UNQ9217		-1.04	1.1	-1.02	1.09	1.13	1.09	-1.06	1.13	AJ695499	t720?		UNQ9217		1.01	1.05	1.02	1.09	-1.04	-1.03	1.09	AJ695499	t480?
81	Tpmt	thiopurine methyltransferase	-1.02	1.08	-1.03	1.05	-1.15	1.1	1.11	-1.15	AJ695798	t60? t240?		Tpmt	thiopurine methyltransferase	-1.04	-1.05	1.13	1.11	1.06	1.1	1.25	1.25	AJ695798			Tpmt	thiopurine methyltransferase	1.25	1.21	-1.03	1.08	-1.03	1.02	1.25	AJ695798	t480?
82	CREM	cAMP responsive element modulator	-1.12	1.17	-1.01	1.12	1.42	2.51	3.77	3.77	AJ696239			CREM	cAMP responsive element modulator	1.06	1.04	1.1	1.34	1.09	1.63	1.41	1.63	AJ696239	t240?		CREM	cAMP responsive element modulator	-1	1.26	1.11	1.05	1.51	1.48	1.51	AJ696239	t60?
83	Rtcd1	RNA terminal phosphate cyclase domain 1	-1.05	-1.05	1.28	-1.09	-1.1	-1.07	1.06	1.28	AJ696322	t15? t30? t60? t120? t240?		Rtcd1	RNA terminal phosphate cyclase domain 1	1.01	1.21	1.12	-1.15	1.13	-1.12	1.03	1.21	AJ696322	t60? t240? t480?		Rtcd1	RNA terminal phosphate cyclase domain 1	1	-1.21	1.16	1.17	-1.11	1.06	-1.21	AJ696322	t15? t60? t120? t240? t480?
84	RFC3	replication factor C (activator 1) 3, 38kDa	1.11	1.3	1.09	1.26	-1.22	1.24	-1.01	1.3	AJ696558			RFC3	replication factor C (activator 1) 3, 38kDa	1.21	1.06	1.1	1.4	-1.1	1.24	-1.07	1.4	AJ696558	t480? t720?		RFC3	replication factor C (activator 1) 3, 38kDa	-1.06	1.24	1.2	1.15	1.13	-1.04	1.24	AJ696558
85	St8sia1	ST8 alpha-N-acetyl-neuraminide alpha-2,8-sialyltransferase 1 (EC:2.4.99.8)	1.08	-1.09	1.51	1.18	-1.05	-1.05	1.05	1.51	AJ699418			St8sia1	ST8 alpha-N-acetyl-neuraminide alpha-2,8-sialyltransferase 1 (EC:2.4.99.8)	1.14	-1.18	1.27	1.25	-1.29	1.09	1.34	1.34	AJ699418	t15? t60? t120?		St8sia1	ST8 alpha-N-acetyl-neuraminide alpha-2,8-sialyltransferase 1 (EC:2.4.99.8)	1.09	1.24	1.27	1.08	1.47	-1.06	1.47	AJ699418	t15?
86	CLCN2	chloride channel 2	-1.02	-1.1	-1.18	-1.12	-1.31	-1.43	-1.05	-1.43	AJ786345	t15? t30? t60? t120? t240? t720?		CLCN2	chloride channel 2	-1.26	1.11	-1.24	1	1.31	-1.17	1.53	1.53	AJ786345			CLCN2	chloride channel 2	1.35	-1.13	1.06	-1.06	-1.46	-1.16	-1.46	AJ786345	t60? t120? t480?
87	Nup133	nucleoporin 133	1.27	-1.01	1.13	1.1	-1.04	-1.01	1.04	1.27	AU231639	t15?		Nup133	nucleoporin 133	1.38	-1.05	1.11	1.14	-1.07	1.05	-1.07	1.38	AU231639	t15? t60? t120? t720?		Nup133	nucleoporin 133	-1.12	1.08	1.13	1.09	1.17	1.05	1.17	AU231639	t60? t480?
88	Lingo1		1.14	-1.1	1.14	-1.07	1.12	-1.29	1.04	-1.29	AU232888	t15? t30? t60? t120? t240? t480? t720?		Lingo1		1.08	-1.01	1.13	-1.19	1.15	-1.14	1.03	-1.19	AU232888	t15? t30? t60? t120? t240? t480? t720?		Lingo1		1.2	1.04	1.07	1.22	1.13	-1.06	1.22	AU232888	t30? t60? t120? t240? t480?
89	Lzts2		-1.3	-1.01	-1.05	-1.08	-1.12	1.02	1.43	1.43	AU233257	t15? t30? t240?		Lzts2		-1.58	1.33	-1.4	-1.18	1.28	-1.02	1.21	-1.58	AU233257			Lzts2		1.33	-1.2	1.32	1.23	-1.31	1.11	1.33	AU233257	t60? t120?
90	Mapkap1	mitogen-activated protein kinase associated protein 1	-1.17	-1.18	1.07	1.15	-1.02	-1.05	1.07	-1.18	AU233439	t720?		Mapkap1	mitogen-activated protein kinase associated protein 1	1.01	-1.06	1.05	1.35	-1.03	1.08	-1.03	1.35	AU233439	t15? t60? t120? t240? t480? t720?		Mapkap1	mitogen-activated protein kinase associated protein 1	-1.06	-1.01	1.08	-1.07	1.1	-1.03	1.1	AU233439	t30? t60? t120? t480?
91	Sgpp1	sphingosine-1-phosphate phosphatase 1	-1.08	1.13	-1.04	-1.11	1.01	1.01	-1.03	1.13	AU233748	t15? t240? t480? t720?		Sgpp1	sphingosine-1-phosphate phosphatase 1	1.11	1.36	1.03	-1.23	1.02	-1.02	-1.18	1.36	AU233748	t15? t120? t240? t480? t720?		Sgpp1	sphingosine-1-phosphate phosphatase 1	-1.15	-1.14	-1.01	1.23	1.11	1.07	1.23	AU233748	t15? t60? t120? t240? t480?
92	PHKB	phosphorylase kinase, beta	-1.03	1.05	-1.23	-1.07	1.15	1.07	-1.35	-1.35	AU233757			PHKB	phosphorylase kinase, beta	1.2	1.16	1.02	1.09	1.32	-1.12	-1.21	1.32	AU233757	t15? t240?		PHKB	phosphorylase kinase, beta	-1.13	1.07	-1.06	1.05	-1.09	1.1	-1.13	AU233757
93	CX3CL1	chemokine (C-X3-C motif) ligand 1	-1.14	1.05	1.19	1.06	1.16	-1	1.03	1.19	AU275398	t720?		CX3CL1	chemokine (C-X3-C motif) ligand 1	-1.05	-1.05	1.07	1.09	1.07	1.03	1.1	1.1	AU275398	t15? t30? t60? t120? t240? t480?		CX3CL1	chemokine (C-X3-C motif) ligand 1	1.1	1.27	1.12	1.04	1.14	1.04	1.27	AU275398	t30? t60? t120? t240? t480?
94	Rab1b	RAB1B, member RAS oncogene family	1.22	-1.02	-1.21	1	-1.2	-1.17	-1.22	1.22	AU276116			Rab1b	RAB1B, member RAS oncogene family	1.26	1.05	1.31	1.11	1.08	-1.05	1.15	1.31	AU276116			Rab1b	RAB1B, member RAS oncogene family	1.28	1.19	-1.22	1.18	-1.01	-1.05	1.28	AU276116
95	RBM20		-1.12	1	-1.09	1.09	-1.06	-1.03	1.07	-1.12	AU276572	t240? t720?		RBM20		-1.07	1.06	1.02	1.06	-1.02	-1	1.14	1.14	AU276572	t15? t30? t60? t120? t240? t480? t720?		RBM20		1.14	1.1	-1.07	1.06	1.16	1.15	1.16	AU276572	t15? t30? t60? t120? t240? t480?
96	Pcsk1n	proprotein convertase subtilisin/kexin type 1 inhibitor	-1.01	1.1	1.24	-1.19	-1.13	-1.08	1.13	1.24	AU277432	t15? t30?		Pcsk1n	proprotein convertase subtilisin/kexin type 1 inhibitor	-1.24	1.09	-1.01	-1.31	1.11	1.28	1.18	-1.31	AU277432			Pcsk1n	proprotein convertase subtilisin/kexin type 1 inhibitor	1.45	1.22	1.4	1.35	-1.13	-1.35	1.45	AU277432
97	Tm2d3		-1.03	-1.03	-1.06	1.07	-1.05	-1.01	-1	1.07	AU279004	t720?		Tm2d3		1.07	1.01	1.08	1.1	-1.08	1.06	1.16	1.16	AU279004	t15? t30? t60? t120? t240? t480? t720?		Tm2d3		-1.03	1.07	-1.1	-1.01	1.12	1	1.12	AU279004	t30? t60? t120? t240? t480?
98	Cntnap2	contactin associated protein-like 2	-1	1.03	-1.05	-1.5	1.04	1.07	-1.14	-1.5	AV590463			Cntnap2	contactin associated protein-like 2	1.13	1.19	1.07	-1.44	-1.03	-1.02	-1.16	-1.44	AV590463	t15? t480?		Cntnap2	contactin associated protein-like 2	1.13	-1.11	-1.04	1.12	1.24	1.11	1.24	AV590463	t30? t480?
99	Slc27a3	solute carrier family 27 (fatty acid transporter), member 3	1.01	-1.08	-1.01	-1	-1.1	1.03	-1	-1.1	AV590860	t30? t240?		Slc27a3	solute carrier family 27 (fatty acid transporter), member 3	1.03	-1.02	1.02	1.16	-1.09	1	1.37	1.37	AV590860			Slc27a3	solute carrier family 27 (fatty acid transporter), member 3	1.12	1.04	-1.06	-1.05	1.18	1.07	1.18	AV590860	t60? t120? t480?
100	BCL9	B-cell CLL/lymphoma 9	-1.04	1.02	1.13	1.1	-1.03	-1.05	-1.02	1.13	AV591055	t15? t30? t60? t120? t240? t720?		BCL9	B-cell CLL/lymphoma 9	-1.03	1.26	1	1.14	1.03	-1.03	-1.02	1.26	AV591055	t15? t30? t60? t120? t240? t480? t720?		BCL9	B-cell CLL/lymphoma 9	-1	-1.07	1.11	1.02	1.02	1.05	1.11	AV591055	t30? t60? t120? t240? t480?
101	Crym	crystallin, mu	1.03	-1.17	1.11	-1.04	-1.02	-1.27	1.17	-1.27	AV592146	t15? t30? t60? t120? t240? t480? t720?		Crym	crystallin, mu	-1.01	-1.22	-1.1	-1.14	1.04	-1.21	1.26	1.26	AV592146	t60? t120? t240? t480?		Crym	crystallin, mu	1.14	1.07	1.23	1.15	1.11	-1.05	1.23	AV592146	t30? t60? t120? t240? t480?
102	Zc3h7a	zinc finger CCCH type containing 7 A	-1.05	1	-1.36	-1.22	1.2	1.13	-1.12	-1.36	AV597353			Zc3h7a	zinc finger CCCH type containing 7 A	1.5	1.14	1	-1.15	1.18	1.03	-1.28	1.5	AV597353	t15? t240?		Zc3h7a	zinc finger CCCH type containing 7 A	-1.28	1.02	-1.08	1.22	1.11	1.11	-1.28	AV597353
103	POGK	pogo transposable element with KRAB domain	1.04	1.05	-1.27	-1.16	-1.17	-1.17	-1.27	-1.27	AV597541	t240?		POGK	pogo transposable element with KRAB domain	1.18	1.03	1.13	-1.08	-1.01	-1.18	-1.18	1.18	AV597541	t480?		POGK	pogo transposable element with KRAB domain	-1.06	1.12	-1.16	1.1	1.02	1.02	-1.16	AV597541	t480?
104	Apobec2	apolipoprotein B editing complex 2	1.42	-1.14	-1.16	-1.06	-1.17	-1.2	-1.11	1.42	AV597974	t30?		Apobec2	apolipoprotein B editing complex 2	1.62	-1.32	1.03	1.37	-1.14	-1.16	1.02	1.62	AV597974			Apobec2	apolipoprotein B editing complex 2	1.02	1.19	-1.12	-1.11	1.24	1.06	1.24	AV597974
105	CRTC3	CREB regulated transcription coactivator 3	-1	-1.04	1.21	1.12	-1.25	-1.07	1.11	-1.25	AV598705	t15? t30? t60? t120? t240?		CRTC3	CREB regulated transcription coactivator 3	-1.15	-1.07	1.26	1.22	-1.03	-1.06	1.51	1.51	AV598705			CRTC3	CREB regulated transcription coactivator 3	1.12	1.18	1	1	-1.03	1.12	1.18	AV598705
106	PDE8B	phosphodiesterase 8B	1.22	1.1	-1.01	1.11	-1.08	-1.23	-1.03	-1.23	AV598726	t120? t240?		PDE8B	phosphodiesterase 8B	-1.02	1.09	-1.09	1.1	1.05	-1.09	1.28	1.28	AV598726			PDE8B	phosphodiesterase 8B	1.22	1.05	1.07	1.07	-1.01	-1.1	1.22	AV598726	t60? t120? t480?
107	Pscd3	pleckstrin homology, Sec7 and coiled-coil domains 3	1.06	1.1	1	-1.25	1.03	1.07	1.07	-1.25	AV598945			Pscd3	pleckstrin homology, Sec7 and coiled-coil domains 3	1.32	1.01	1.06	-1.13	1.06	1.06	-1.08	1.32	AV598945	t15? t60?		Pscd3	pleckstrin homology, Sec7 and coiled-coil domains 3	-1.12	1.12	1.04	1.08	1.07	1.11	1.12	AV598945	t480?
108	RDM1		-1.07	1	1.07	1.14	-1.22	-1.06	-1.05	-1.22	AV598984			RDM1		1.05	1.01	1.08	1.31	-1.01	1.03	1.13	1.31	AV598984	t720?		RDM1		1	1.08	1.1	1.02	1.01	-1.02	1.1	AV598984
109	ZNF331		1.62	1.06	1.46	1.12	1.05	1.04	1.7	1.7	AV600880			ZNF331		1.44	1.18	1.33	1.63	1.57	1.17	2.4	2.4	AV600880	t720?		ZNF331		1.5	1.12	1.23	-1.09	-1.17	-1.08	1.5	AV600880
110	Mrpl10	mitochondrial ribosomal protein L10	1.2	-1.02	1.04	1.38	-1.08	-1.09	-1.02	1.38	AV600975			Mrpl10	mitochondrial ribosomal protein L10	1.28	1.04	1.22	1.52	1.05	-1.05	1.43	1.52	AV600975			Mrpl10	mitochondrial ribosomal protein L10	1.22	1.12	-1.08	1.09	1.12	1.01	1.22	AV600975
111	PKP4	plakophilin 4	1.08	-1.25	1.34	1.04	1.05	-1.05	1.16	1.34	AV601262			PKP4	plakophilin 4	-1.01	-1.08	1.13	-1.04	1.43	-1.11	1.28	1.43	AV601262	t60? t120?		PKP4	plakophilin 4	1.12	-1.03	1.31	1.26	-1.25	1.03	1.31	AV601262	t60?
112	POLR3F	polymerase (RNA) III (DNA directed) polypeptide F, 39 kDa	1.05	-1.01	-1.16	-1.04	1.04	1.11	-1.13	-1.16	AV601608	t720?		POLR3F	polymerase (RNA) III (DNA directed) polypeptide F, 39 kDa	1.3	1.1	1.05	1.14	1.16	1.05	1.1	1.3	AV601608	t15? t60? t240? t480?		POLR3F	polymerase (RNA) III (DNA directed) polypeptide F, 39 kDa	-1.19	-1.03	-1.13	-1.05	-1.05	1.1	-1.19	AV601608	t30? t60? t120? t240? t480?
113	KCNJ1	potassium inwardly-rectifying channel, subfamily J, member 1	-1.1	1.12	1.07	-1.47	-1.36	1.06	1.1	-1.47	AV604348	t15? t30? t60? t120? t240?		KCNJ1	potassium inwardly-rectifying channel, subfamily J, member 1	-1.1	1.11	-1.29	-1.39	-1.16	-1.06	-1.33	-1.39	AV604348	t240? t480? t720?		KCNJ1	potassium inwardly-rectifying channel, subfamily J, member 1	1.18	1.03	1.42	1.06	-1.03	1.25	1.42	AV604348	t60? t120? t240?
114	CENPI		1.11	1.11	1.02	-1.01	1.1	1.13	-1.15	-1.15	AV604632			CENPI		1.08	-1.03	-1.04	-1.04	1.08	1.19	-1.02	1.19	AV604632			CENPI		1.19	1.23	1.27	1.14	1.01	-1.05	1.27	AV604632
115	CUTL2	cut-like homeobox 2	1.03	-1.15	1.22	-1.11	1.11	-1.45	1.16	-1.45	AV605137	t60? t240? t480? t720?		CUTL2	cut-like homeobox 2	1.03	-1.11	1.16	1.09	1.23	-1.2	1.33	1.33	AV605137	t15? t30? t60? t120? t240? t480? t720?		CUTL2	cut-like homeobox 2	1.13	-1.03	1.17	-1.02	1.05	-1.01	1.17	AV605137	t15? t30? t60? t120? t240? t480?
116	AACS	acetoacetyl-CoA synthetase	1.08	-1.11	1.72	1.3	1.04	-1.21	1.11	1.72	AV606435			AACS	acetoacetyl-CoA synthetase	1.06	-1.45	1.16	1.4	1.03	1.01	1.4	-1.45	AV606435			AACS	acetoacetyl-CoA synthetase	1.23	1.55	1.71	1.2	1.21	-1.07	1.71	AV606435
117	RET	ret proto-oncogene (EC:2.7.10.1)	1.09	1.01	-1.04	1.01	1.18	1.03	1.06	1.18	AV606580	t480? t720?		RET	ret proto-oncogene (EC:2.7.10.1)	1.09	1.06	-1.03	1.07	1.29	1.06	1.08	1.29	AV606580	t15? t30? t60? t120? t240? t480? t720?		RET	ret proto-oncogene (EC:2.7.10.1)	1.01	1.05	1.03	1.03	1.05	1.04	1.05	AV606580	t30? t60? t120? t240? t480?
118	Trim44	tripartite motif-containing 44	1.27	-1.04	1.33	1.1	1.06	1.03	1.08	1.33	AV606864			Trim44	tripartite motif-containing 44	1.04	1.06	-1.05	1.04	1.08	1.14	1.16	1.16	AV606864			Trim44	tripartite motif-containing 44	1.29	1.07	1.51	1.25	1.11	-1.02	1.51	AV606864
119	BTD	biotinidase	1.17	-1.38	1.48	-1.01	-1.68	1.03	-1.05	-1.68	AV607074			BTD	biotinidase	1.06	1.03	1.23	1.22	-1.15	1.01	1.22	1.23	AV607074			BTD	biotinidase	1.14	-1.2	1.37	1.06	-1.17	1.06	1.37	AV607074
120	NAALADL1	N-acetylated alpha-linked acidic dipeptidase-like 1	1.2	-1.15	-1.64	-1.05	-1.29	-1.39	-4.29	-4.29	AV607093	t15? t30? t60? t480? t720?		NAALADL1	N-acetylated alpha-linked acidic dipeptidase-like 1	1.13	2.22	-1.02	-1.54	1.39	-1.47	-1.77	2.22	AV607093	t15? t30? t120? t240? t480?		NAALADL1	N-acetylated alpha-linked acidic dipeptidase-like 1	1.3	-2.36	-1.24	1.66	-1.08	1.2	-2.36	AV607093	t15? t30? t60? t120? t240? t480?
121	Hist3h2a	histone cluster 3, H2a	1.13	-1.03	-1.05	1.04	-1.09	1.21	-1.13	1.21	AV607234	t15?		Hist3h2a	histone cluster 3, H2a	1.37	-1.07	-1.05	1.33	1.03	1.18	1.04	1.37	AV607234			Hist3h2a	histone cluster 3, H2a	1.02	1.16	1.12	-1.07	1.03	1.07	1.16	AV607234
122	Stt3a		1.15	1.12	-1.13	-1.16	-1.17	1.02	1.04	-1.17	AV607933			Stt3a		1.3	1.27	1.13	-1.06	1.04	-1.01	1.03	1.3	AV607933			Stt3a		-1.1	1.01	1.02	1.14	-1.04	1.02	1.14	AV607933
123	Atp5s	ATP synthase, H+ transporting, mitochondrial F0 complex, subunit s	1.12	-1.08	1.12	-1.13	-1.14	-1.03	-1.01	-1.14	AV611503			Atp5s	ATP synthase, H+ transporting, mitochondrial F0 complex, subunit s	-1.06	1.04	-1.02	1.03	-1	1.05	1.1	1.1	AV611503	t15? t60? t120? t240? t480?		Atp5s	ATP synthase, H+ transporting, mitochondrial F0 complex, subunit s	1.16	-1.04	1.17	-1.04	-1.02	-1.04	1.17	AV611503	t30? t60? t120? t480?
124	Acad9	acyl-Coenzyme A dehydrogenase family, member 9	1.02	-1.03	1.17	1.27	-1.16	1.01	1.05	1.27	AV612395			Acad9	acyl-Coenzyme A dehydrogenase family, member 9	-1	1.14	1.24	1.81	1.2	1.25	1.56	1.81	AV612395			Acad9	acyl-Coenzyme A dehydrogenase family, member 9	1.2	1.04	1.17	-1.07	-1.16	-1.2	1.2	AV612395
125	Cadm1		1.04	1.15	-1.22	1.05	-1.07	1	-1.14	-1.22	AV613155			Cadm1		1.2	1.17	1.25	1.31	-1.13	1.08	1.11	1.31	AV613155			Cadm1		1.16	1.2	-1.23	1.07	1.28	-1.03	1.28	AV613155
126	IARS	isoleucyl-tRNA synthetase	-1.16	-1.07	1.35	1.28	-1.09	1.04	1.14	1.35	AV613406			IARS	isoleucyl-tRNA synthetase	-1.01	-1.12	1.44	1.34	-1.07	1.08	1.18	1.44	AV613406			IARS	isoleucyl-tRNA synthetase	-1.01	1.19	1.09	1.1	1.16	-1.06	1.19	AV613406
127	Sox13	SRY-box containing gene 13	1.02	-1.04	1.03	1.04	1.04	-1.03	-1.09	-1.09	AV613624	t720?		Sox13	SRY-box containing gene 13	1.08	1.08	1.07	-1.02	-1.03	-1.04	-1.01	1.08	AV613624	t15? t30? t60? t120? t240? t480? t720?		Sox13	SRY-box containing gene 13	1.06	1.01	-1.01	1.07	1.21	1.15	1.21	AV613624	t30? t60? t120? t240? t480?
128	ABI3BP		-1.16	1.19	-1.24	-1.05	-1.17	1.27	-1.08	1.27	AV613881	t720?		ABI3BP		1.17	1.35	1.09	-1.08	-1.11	1.2	-1.09	1.35	AV613881	t15? t120? t240? t480? t720?		ABI3BP		-1.22	-1.07	-1.17	1.05	1.06	1.14	-1.22	AV613881	t15? t60? t120? t480?
129	clpB		1.04	-1.03	-1.39	-1.3	1.15	1.11	-1.41	-1.41	AV614017	t15? t30? t240? t480?		clpB		1.43	1.18	1.02	-1.13	1.16	-1.06	-1.58	-1.58	AV614017	t15? t480? t720?		clpB		-1.17	-1.15	-1.25	1.06	1.16	1.19	-1.25	AV614017	t30? t480?
130	LOC652614	similar to HLA class I histocompatibility antigen, A-11 alpha chain precursor (MHC class I antigen A*11)	1.1	1.45	-1.5	-1.14	-1.41	-1.06	-1.68	-1.68	AV614702	t30?		LOC652614	similar to HLA class I histocompatibility antigen, A-11 alpha chain precursor (MHC class I antigen A*11)	1.11	1.2	-1.06	1.43	1.35	-1.01	-1.16	1.43	AV614702			LOC652614	similar to HLA class I histocompatibility antigen, A-11 alpha chain precursor (MHC class I antigen A*11)	1.38	1.22	-1.14	-1.12	-1.49	-1.01	-1.49	AV614702
131	Vamp4	vesicle-associated membrane protein 4	-1.24	-1.08	1.12	1.35	1.23	-1.03	1.22	1.35	AV615322			Vamp4	vesicle-associated membrane protein 4	1.04	-1.13	1.23	1.45	1.11	1.06	1.19	1.45	AV615322	t120?		Vamp4	vesicle-associated membrane protein 4	-1.22	1.13	1.04	1.02	1.16	-1.02	-1.22	AV615322
132	NT5DC3		1.49	-1.08	1.21	1.35	-1.17	-1.12	-1.02	1.49	AV616847			NT5DC3		1.22	-1.01	1.23	1.72	1.08	1.04	1.47	1.72	AV616847			NT5DC3		1.39	1.14	1.1	-1.02	-1.02	-1.07	1.39	AV616847
133	Mospd3	motile sperm domain containing 3	1.22	-1	-1.38	-1.15	1.06	-1.05	-1.3	-1.38	AV617476			Mospd3	motile sperm domain containing 3	1.33	1.25	1.06	1.02	-1.01	-1.16	-1.22	1.33	AV617476			Mospd3	motile sperm domain containing 3	-1.07	-1.04	-1.27	1.04	1.35	1.13	1.35	AV617476
134	Nupl1	nucleoporin like 1	-1.05	1.12	1.11	1.03	1.06	1.07	-1.2	-1.2	AV618297	t15? t30?		Nupl1	nucleoporin like 1	1.05	1.07	1.01	1.15	1.08	1.05	-1.01	1.15	AV618297	t15? t60? t120? t240? t480?		Nupl1	nucleoporin like 1	-1.01	1.12	1.18	1.04	1.04	1.08	1.18	AV618297	t60? t120? t480?
135	KRT6C		-1.04	-1.04	1.09	-1.02	1.06	-1.03	1.07	1.09	AV618625	t720?		KRT6C		1.01	-1.03	1.04	1.02	1.03	1.07	1.22	1.22	AV618625	t15? t30? t60? t120? t240? t480?		KRT6C		1.09	1.07	1.04	1.01	1.12	-1.02	1.12	AV618625	t30? t60? t120? t480?
136	IVL	involucrin	1.05	-1.04	-1.03	1.04	1.08	-1.04	1.03	1.08	AV618671	t720?		IVL	involucrin	1.05	1.02	1.04	1.07	-1	-1	1.16	1.16	AV618671	t15? t30? t60? t120? t240? t480? t720?		IVL	involucrin	1.11	1.07	-1.03	-1.02	1.19	1.13	1.19	AV618671	t30? t60? t120? t240? t480?
137	Fxyd7	FXYD domain-containing ion transport regulator 7	1.07	1.03	1.56	1.06	-1.48	-1.01	1.07	1.56	AV662599			Fxyd7	FXYD domain-containing ion transport regulator 7	-1.34	-1.07	1.48	1.19	-1.37	-1.05	1.79	1.79	AV662599			Fxyd7	FXYD domain-containing ion transport regulator 7	1.39	1.27	1.17	1.01	1.11	1.02	1.39	AV662599
138	WASF1	WAS protein family, member 1	1.26	-1.22	1.14	1.17	-1.22	-1.4	-1	-1.4	AV664100	t15? t60?		WASF1	WAS protein family, member 1	1.23	-1.18	1.66	1.14	-1.13	-1.16	1.19	1.66	AV664100			WASF1	WAS protein family, member 1	1.27	1.16	-1.23	1.15	1.22	-1.14	1.27	AV664100
139	DYNLRB2		1.05	1.08	1.03	-1.12	1.12	-1.13	1.13	1.13	AV665645	t120? t240? t480? t720?		DYNLRB2		1.09	1.38	-1.08	-1.04	1.28	-1.15	-1.02	1.38	AV665645	t15? t30? t60? t240? t480? t720?		DYNLRB2		1.1	-1.17	1.09	1.02	1.11	1.12	-1.17	AV665645	t30? t60? t120? t240? t480?
140	Decr2	2-4-dienoyl-Coenzyme A reductase 2, peroxisomal	-1.03	-1.14	-1.01	1.12	-1.71	-1.38	1.12	-1.71	AV666020	t15?		Decr2	2-4-dienoyl-Coenzyme A reductase 2, peroxisomal	-1.71	1.02	-1	1.39	1.16	-1.2	2.01	2.01	AV666020			Decr2	2-4-dienoyl-Coenzyme A reductase 2, peroxisomal	1.82	1.07	1.13	1.04	-1.64	-1.11	1.82	AV666020
141	MAP3K14	mitogen-activated protein kinase kinase kinase 14	1.2	-1.06	-1.17	1.15	-1.18	-1.01	1.03	1.2	AV668200			MAP3K14	mitogen-activated protein kinase kinase kinase 14	1.2	1.09	1.04	1.51	1.08	1.01	1.37	1.51	AV668200			MAP3K14	mitogen-activated protein kinase kinase kinase 14	1.14	-1.02	-1.17	-1.13	-1.03	1.01	-1.17	AV668200
142	LOC614210		-1.01	-1.04	1.04	1.02	-1.04	-1.09	1.08	-1.09	AW244888	t60? t120? t240? t720?		LOC614210		1.04	-1.09	1.16	1.05	-1.06	-1	1.18	1.18	AW244888	t15? t30? t60? t120? t240? t480?		LOC614210		1.07	1.12	-1.1	1.02	1.15	-1	1.15	AW244888	t30? t60? t120? t240? t480?
143	MGC34646		1.14	-1.05	-1.02	-1.2	-1.07	-1.1	1.08	-1.2	AW261136	t720?		MGC34646		1.16	1.02	1.07	1.04	-1.03	-1.08	1.16	1.16	AW261136	t15? t60? t240? t480?		MGC34646		1.02	1	-1.09	-1.15	1.11	1.02	-1.15	AW261136	t60? t120? t480?
144	Pomt1	protein-O-mannosyltransferase 1	-1.12	-1.06	-1.22	-1.13	-1.16	-1.21	-1.31	-1.31	AW261140			Pomt1	protein-O-mannosyltransferase 1	1.27	1.36	1.07	1.14	-1.12	-1.2	1.11	1.36	AW261140			Pomt1	protein-O-mannosyltransferase 1	-1.26	-1.17	-1.13	1.04	1.16	1.03	-1.26	AW261140
145	Psmd4	proteasome (prosome, macropain) 26S subunit, non-ATPase, 4	1.35	1.06	1.44	1.24	-1.2	-1.17	1.18	1.44	AW261142	t15? t30? t120?		Psmd4	proteasome (prosome, macropain) 26S subunit, non-ATPase, 4	1.21	1.15	1.45	1.26	1.09	-1.09	2	2	AW261142			Psmd4	proteasome (prosome, macropain) 26S subunit, non-ATPase, 4	1.13	1.06	1.22	1.17	-1.08	-1.04	1.22	AW261142
146	RPN2	ribophorin II	1.43	-1.25	1.27	1.35	1.07	-1.07	1.11	1.43	AW261152			RPN2	ribophorin II	1.35	-1.2	1.38	1.34	-1.05	-1.06	1.65	1.65	AW261152			RPN2	ribophorin II	1.26	1.18	1.16	1.35	1.37	1.01	1.37	AW261152
147	MAN1C1	mannosidase, alpha, class 1C, member 1	-1.14	-1.04	-1.05	-1.02	-1.04	1.03	1.01	-1.14	AW261154	t240? t720?		MAN1C1	mannosidase, alpha, class 1C, member 1	1.01	1.06	1.07	1.1	1.15	1.09	1.08	1.15	AW261154	t15? t30? t60? t120? t240? t480?		MAN1C1	mannosidase, alpha, class 1C, member 1	-1.06	1.02	-1.07	1.01	-1.11	1.02	-1.11	AW261154	t15? t30? t60? t120? t240? t480?
148	CSRNP2	cysteine-serine-rich nuclear protein 2	1.17	-1.13	-1	-1.1	1.11	1.08	-1.05	1.17	AW261156			CSRNP2	cysteine-serine-rich nuclear protein 2	1.28	-1.14	1.22	1.06	1.02	1.1	1.1	1.28	AW261156	t60? t240?		CSRNP2	cysteine-serine-rich nuclear protein 2	1.03	1.1	-1.11	-1.05	1.17	1.06	1.17	AW261156	t60? t120? t480?
149	ANAPC11	APC11 anaphase promoting complex subunit 11 homolog (yeast)	1.22	-1.29	1.9	1.33	-1.11	1.23	-1.01	1.9	AW261162			ANAPC11	APC11 anaphase promoting complex subunit 11 homolog (yeast)	1.18	-1.67	1.46	1.5	1.15	1.37	1.46	-1.67	AW261162			ANAPC11	APC11 anaphase promoting complex subunit 11 homolog (yeast)	1.12	1.53	1.52	1.1	-1.06	-1.03	1.53	AW261162
150	ETFA	electron-transfer-flavoprotein, alpha polypeptide (glutaric aciduria II)	-1.17	1.06	-1.38	-1.11	-1.09	1.01	-1.2	-1.38	AW261167			ETFA	electron-transfer-flavoprotein, alpha polypeptide (glutaric aciduria II)	-1.02	1.04	1.07	1.13	1.03	1.02	-1.13	1.13	AW261167			ETFA	electron-transfer-flavoprotein, alpha polypeptide (glutaric aciduria II)	1.01	1.17	-1.16	-1.03	1.06	-1	1.17	AW261167
151	PCCA	propionyl Coenzyme A carboxylase, alpha polypeptide	1.07	-1.07	-1.18	-1.11	-1.1	-1.17	-1.28	-1.28	AW261169			PCCA	propionyl Coenzyme A carboxylase, alpha polypeptide	1.07	-1.04	1.15	1.05	-1.02	1.01	1.01	1.15	AW261169	t240? t480?		PCCA	propionyl Coenzyme A carboxylase, alpha polypeptide	1.15	1.13	-1.17	-1.01	1.05	-1.12	-1.17	AW261169	t60? t120? t480?
152	Cyp51	cytochrome P450, family 51	-1.22	1.18	-1.06	-1.19	-1.15	-1.4	-1.12	-1.4	AW261176	t240?		Cyp51	cytochrome P450, family 51	1.04	1.21	1.18	-1.08	1.02	-1.32	-1.19	-1.32	AW261176	t15? t60? t120? t240? t480? t720?		Cyp51	cytochrome P450, family 51	-1.18	1.04	-1.13	1.01	-1.02	1.01	-1.18	AW261176	t15? t30? t60? t120? t240? t480?
153	Gorasp2	golgi reassembly stacking protein 2	-1.01	1.08	-1.07	1.1	-1.04	1.08	1.2	1.2	AW261178			Gorasp2	golgi reassembly stacking protein 2	1.08	1.08	1.19	1.09	-1.01	1.1	1.26	1.26	AW261178			Gorasp2	golgi reassembly stacking protein 2	1.03	1.1	-1.14	1.2	1.13	-1.02	1.2	AW261178
154	ZNF189		-1.18	1.07	-1.19	-1.09	1.09	-1.09	-1.07	-1.19	AW261182	t15? t30? t240? t480? t720?		ZNF189		-1.11	1.18	1.05	-1.02	1.08	1.01	-1.06	1.18	AW261182	t15? t60? t120? t240? t480? t720?		ZNF189		-1.3	-1.06	-1.19	1.01	1.05	-1.05	-1.3	AW261182	t15? t30? t60? t120? t240? t480?
155	TNFAIP6	tumor necrosis factor, alpha-induced protein 6	-1.03	-1.02	-1	1.01	1.03	1.15	1.12	1.15	AW261183	t15? t60? t240? t480? t720?		TNFAIP6	tumor necrosis factor, alpha-induced protein 6	1.13	1.08	1.11	1.03	1.05	1.07	-1.22	-1.22	AW261183	t15? t30? t60? t120? t240? t480? t720?		TNFAIP6	tumor necrosis factor, alpha-induced protein 6	-1.13	-1.01	-1.08	1.04	1.02	1.14	1.14	AW261183	t15? t30? t60? t120? t240? t480?
156	TNFAIP6	tumor necrosis factor, alpha-induced protein 6	-1.31	-1.09	1.17	1.06	1.09	1.04	1.73	1.73	AW261184	t60?		TNFAIP6	tumor necrosis factor, alpha-induced protein 6	1.02	-1.07	1.25	1.13	-1.12	1.11	1.36	1.36	AW261184	t15? t30? t60? t120? t240? t480? t720?		TNFAIP6	tumor necrosis factor, alpha-induced protein 6	-1.01	1.04	-1.03	-1.01	1.37	1.01	1.37	AW261184	t15? t30? t60? t120? t240? t480?
157	Sh3bgrl3	SH3 domain binding glutamic acid-rich protein like 3	-1	-1.07	1.74	-1.15	-1.22	1.1	-1.03	1.74	AW261188			Sh3bgrl3	SH3 domain binding glutamic acid-rich protein like 3	-1.26	1.17	1.38	-1.09	1.08	1.1	1.23	1.38	AW261188			Sh3bgrl3	SH3 domain binding glutamic acid-rich protein like 3	1.55	-1.04	1.49	1.28	-1.11	-1.04	1.55	AW261188
158	ACTB	actin, beta	-1.02	1.17	1.7	1.32	1.14	1.4	1.84	1.84	AW261194			ACTB	actin, beta	-1.3	1.41	1.23	1.21	1.29	1.53	1.89	1.89	AW261194			ACTB	actin, beta	1.41	1.04	1.73	1.33	1.09	-1.05	1.73	AW261194
159	Smug1	single-strand selective monofunctional uracil DNA glycosylase	1.23	-1.1	1.35	-1	-1.05	1.05	1.07	1.35	AW261195			Smug1	single-strand selective monofunctional uracil DNA glycosylase	1.23	-1.03	1.36	1.39	1.17	1.07	1.67	1.67	AW261195			Smug1	single-strand selective monofunctional uracil DNA glycosylase	1.04	1.15	1.2	-1.04	-1.01	1.02	1.2	AW261195
160	LOC540816		1.25	1.05	1.08	-1.04	-1.14	1.04	-1.01	1.25	AW266849			LOC540816		1.06	-1.04	1.16	1.18	1.03	1.09	1.19	1.19	AW266849			LOC540816		1.14	1.21	1	-1.03	1.01	-1.03	1.21	AW266849
161	Slc25a10	solute carrier family 25 (mitochondrial carrier, dicarboxylate transporter), member 10	1.15	-1.28	1.25	-1	-1.15	-1.05	1.1	-1.28	AW266851	t15? t30?		Slc25a10	solute carrier family 25 (mitochondrial carrier, dicarboxylate transporter), member 10	-1.33	-1.08	1.03	-1.09	1.23	1.09	1.23	-1.33	AW266851			Slc25a10	solute carrier family 25 (mitochondrial carrier, dicarboxylate transporter), member 10	1.64	1	1.28	1.18	-1.27	-1.03	1.64	AW266851	t60? t120?
162	ZNF192		-1.34	1.26	-3.1	1.08	1.6	-1.38	-2.07	-3.1	AW266852			ZNF192		1.32	1.56	-1.09	1.06	1.46	-1.76	-1.57	-1.76	AW266852			ZNF192		-1.46	-1.01	-2.31	1.36	1.33	1.26	-2.31	AW266852
163	LOC511794		1.07	1.03	-1.04	1.05	-1.05	1.04	1.02	1.07	AW266853	t720?		LOC511794		1.08	1.05	1.08	1.14	-1.14	1.06	1.12	1.14	AW266853	t15? t30? t60? t120? t240? t480?		LOC511794		1.05	1.13	-1.11	-1.05	1.22	1.03	1.22	AW266853	t30? t60? t120? t240? t480?
164	HNRPAB	heterogeneous nuclear ribonucleoprotein A/B	-1.03	1.06	1.01	1.47	-1.14	1.43	1.13	1.47	AW266855	t15?		HNRPAB	heterogeneous nuclear ribonucleoprotein A/B	1.46	1.09	1.29	1.42	1.19	1.19	1.4	1.46	AW266855			HNRPAB	heterogeneous nuclear ribonucleoprotein A/B	-1.15	1.07	-1.03	1.37	-1.07	1.17	1.37	AW266855
165	Msrb2		-1.03	1	-1.03	-1.05	-1	1.01	-1.02	-1.05	AW266859	t720?		Msrb2		1.02	1.05	1.08	-1	-1.01	1.05	1.03	1.08	AW266859	t15? t30? t60? t120? t240? t480?		Msrb2		1.04	1.1	-1.06	-1.02	1.08	1.03	1.1	AW266859	t15? t30? t60? t120? t240? t480?
166	LOC533968		1.09	1.05	-1.38	-1.03	1.05	1.14	-1.05	-1.38	AW266862			LOC533968		1.21	1.04	-1.06	1.28	-1.07	1.08	-1.02	1.28	AW266862	t60? t240? t480?		LOC533968		1.02	1.11	-1.12	-1.16	1.22	1.11	1.22	AW266862	t60? t120? t480?
167	C6orf106		1.06	1.04	-1.06	1.02	-1.03	-1.02	-1	1.06	AW266864	t240? t480? t720?		C6orf106		1.16	1.23	1.02	-1.03	-1.07	1.05	1.02	1.23	AW266864	t15? t30? t60? t120? t240? t480? t720?		C6orf106		1.03	-1.01	-1.05	1.05	1.12	1.06	1.12	AW266864	t30? t60? t120? t240? t480?
168	Ptpns1		-1.16	-1.06	1.02	-1.05	-1.08	-1	1.15	-1.16	AW266867	t240? t720?		Ptpns1		1.09	1.08	1.01	1.06	-1.07	1.09	1.15	1.15	AW266867	t15? t60? t120? t240? t480? t720?		Ptpns1		1.01	-1.05	1.04	-1.02	1.09	1.01	1.09	AW266867	t15? t30? t60? t120? t240? t480?
169	Tmem18		-1.04	-1.05	-1	1.05	-1.02	1.03	-1.03	1.05	AW266869	t60? t480?		Tmem18		-1.07	-1.03	1.07	1.05	-1.14	1.1	1.27	1.27	AW266869	t15? t30? t60? t120? t240? t480?		Tmem18		1.44	1.05	-1.03	1.06	1.18	1.02	1.44	AW266869	t15? t30? t60? t120? t240? t480?
170	HADHB	hydroxyacyl-Coenzyme A dehydrogenase/3-ketoacyl-Coenzyme A thiolase/enoyl-Coenzyme A hydratase (trif	-1.23	1.06	-1.21	1.17	1.11	-1.06	-1.41	-1.41	AW266873	t15?		HADHB	hydroxyacyl-Coenzyme A dehydrogenase/3-ketoacyl-Coenzyme A thiolase/enoyl-Coenzyme A hydratase (trif	1.1	-1.02	1.08	1.28	1.1	-1.01	-1.41	-1.41	AW266873	t15? t120? t240?		HADHB	hydroxyacyl-Coenzyme A dehydrogenase/3-ketoacyl-Coenzyme A thiolase/enoyl-Coenzyme A hydratase (trif	-1.03	1.2	-1.09	1.09	1.09	-1.05	1.2	AW266873	t480?
171	MGC142452		1.08	-1.07	-1.29	-1.17	1.03	1.08	-1.18	-1.29	AW266874			MGC142452		1.5	1.26	-1.2	-1.08	-1.09	-1.04	-1.37	1.5	AW266874	t15?		MGC142452		-1.14	-1.22	-1.01	1.08	1.42	1.12	1.42	AW266874
172	PCBP1	poly(rC) binding protein 1	-1.59	1.09	-1.22	1.1	1.47	1.27	-1.03	-1.59	AW266875			PCBP1	poly(rC) binding protein 1	-1.18	1.12	1.07	1.15	1.33	1.25	-1.28	1.33	AW266875			PCBP1	poly(rC) binding protein 1	-1.15	1.2	-1.05	1.27	1.33	1.05	1.33	AW266875
173	MGC142613		-1	1.04	-1.1	-1.01	-1.01	1.03	-1.03	-1.1	AW266876	t720?		MGC142613		1.24	1.05	1.01	1.18	-1.06	1.03	-1.12	1.24	AW266876	t15? t30? t60? t120? t240? t480? t720?		MGC142613		-1.13	1.08	-1.02	-1.09	1.12	1.11	-1.13	AW266876	t15? t30? t60? t120? t240? t480?
174	MGC142613		1.06	-1.01	1.09	1.02	-1.03	1.07	1.26	1.26	AW266877			MGC142613		1.19	-1.09	1.09	1.06	-1	1.12	1.08	1.19	AW266877	t15? t30? t60? t120? t240? t480? t720?		MGC142613		1.1	1.12	1.04	-1	1.08	1.05	1.12	AW266877	t30? t60? t120? t240? t480?
175	Tagln2	transgelin 2	1.2	-1.14	1.18	1.08	1.01	1.01	-1.15	1.2	AW266884			Tagln2	transgelin 2	1.26	-1.21	1.29	1.71	1.24	1.19	1.39	1.71	AW266884			Tagln2	transgelin 2	1.21	1.39	1.25	-1.13	1.03	-1.06	1.39	AW266884
176	MGC127582		1.08	-1.01	1.02	1.05	-1.05	-1.01	-1.01	1.08	AW266886	t720?		MGC127582		1.21	1.17	1.02	1.25	-1.07	1.05	1.08	1.25	AW266886	t15? t30? t60? t120? t240? t480? t720?		MGC127582		1.09	-1.01	1.02	-1.08	1.15	1.05	1.15	AW266886	t15? t30? t60? t120? t240? t480?
177	C6orf65		-1.06	-1.08	1.03	1.04	-1.01	-1.02	1.03	-1.08	AW266887	t720?		C6orf65		1.11	1.07	1.06	1.08	1.05	-1	1.06	1.11	AW266887	t15? t30? t60? t120? t240? t480? t720?		C6orf65		1.01	-1.01	1.01	1.01	1.07	1.08	1.08	AW266887	t15? t30? t60? t120? t240? t480?
178	RAC1	ras-related C3 botulinum toxin substrate 1 (rho family, small GTP binding protein Rac1)	-1.11	1.26	-1.35	1.12	-1.02	1.08	-1.45	-1.45	AW266889			RAC1	ras-related C3 botulinum toxin substrate 1 (rho family, small GTP binding protein Rac1)	1.21	1.18	1.15	1.36	1.28	-1.01	-1	1.36	AW266889			RAC1	ras-related C3 botulinum toxin substrate 1 (rho family, small GTP binding protein Rac1)	1.05	1.25	-1.22	1.13	1.02	1.07	1.25	AW266889
179	Tmed6		-1.09	-1.11	-1.01	1.07	1.01	1.02	1.05	-1.11	AW266891	t15? t720?		Tmed6		1.09	-1.02	1.06	1.12	-1.06	1.05	1.07	1.12	AW266891	t15? t30? t60? t120? t240? t480? t720?		Tmed6		-1.15	1.04	-1.02	-1.02	1.17	1.04	1.17	AW266891	t15? t30? t60? t120? t240? t480?
180	MGC142375		1.16	-1.07	1.12	-1.05	1.08	1.01	1.04	1.16	AW266892	t720?		MGC142375		1.21	1.03	1.06	1.08	-1.07	1.06	1.13	1.21	AW266892	t15? t30? t60? t120? t240? t480? t720?		MGC142375		1.04	1.01	1.05	-1.12	1.21	1.03	1.21	AW266892	t30? t60? t120? t240? t480?
181	MGC128514		1.14	-1.01	1.01	1	-1.02	-1.02	1.13	1.14	AW266895	t240? t720?		MGC128514		1.22	1.12	1.09	1.07	-1	1.02	1.08	1.22	AW266895	t15? t30? t60? t120? t240? t480? t720?		MGC128514		1.03	1	-1.05	-1.04	1.09	1.03	1.09	AW266895	t30? t60? t120? t240? t480?
182	AW266898		-1.01	-1.01	1.08	-1.01	1.03	-1	-1.04	1.08	AW266898	t15? t60? t240? t480? t720?		AW266898		1.09	1.27	1.03	1.06	-1.04	1.05	-1	1.27	AW266898	t15? t30? t60? t120? t240? t480?		AW266898		-1.01	1.01	1.08	1.01	1.15	1.03	1.15	AW266898	t30? t60? t120? t240? t480?
183	FXR1	fragile X mental retardation gene 1, autosomal homolog	1.02	1.17	-1.12	-1.04	-1.01	1.05	-1.07	1.17	AW266900			FXR1	fragile X mental retardation gene 1, autosomal homolog	1.24	1.06	1.13	1.18	1.1	1.2	-1.23	1.24	AW266900			FXR1	fragile X mental retardation gene 1, autosomal homolog	-1.06	1.29	-1.06	1.04	1.06	-1.1	1.29	AW266900
184	LOC517545		1.08	1.29	-1.42	-1.38	-1.28	-1.15	-1.09	-1.42	AW266901			LOC517545		1	1.49	-1.26	-1.37	-1.44	-1.13	-1.08	1.49	AW266901			LOC517545		1.24	1.06	-1.02	1.33	1.36	1.02	1.36	AW266901
185	Cited1	Cbp/p300-interacting transactivator with Glu/Asp-rich carboxy-terminal domain 1	1.03	-1.01	1.01	1	1.03	-1.07	-1.01	-1.07	AW266903	t720?		Cited1	Cbp/p300-interacting transactivator with Glu/Asp-rich carboxy-terminal domain 1	1.04	1.12	1.09	-1.02	-1.02	-1.04	1.14	1.14	AW266903	t15? t30? t60? t120? t240? t480? t720?		Cited1	Cbp/p300-interacting transactivator with Glu/Asp-rich carboxy-terminal domain 1	1.13	1.03	-1.08	1.03	1.16	1.13	1.16	AW266903	t30? t60? t120? t240? t480?
186	QSCN6		1.26	-1.26	1.1	1.51	-1.1	-1.07	1.12	1.51	AW266911			QSCN6		1.49	-1.01	1.27	1.71	1.04	-1.05	1.68	1.71	AW266911			QSCN6		-1.07	-1.03	1.04	1.17	1.05	1.03	1.17	AW266911
187	DCN	decorin	1.26	1.14	1.15	1.41	-1.13	1.11	1.18	1.41	AW266913	t120?		DCN	decorin	1.15	1.15	1.02	1.51	1.06	1.24	1.62	1.62	AW266913	t120?		DCN	decorin	1.05	1.15	1.14	-1.11	-1.02	-1.02	1.15	AW266913
188	GPX3	glutathione peroxidase 3 (plasma)	1.19	1.1	-1.06	-1.52	-1.07	-1.17	-1.32	-1.52	AW266929	t15?		GPX3	glutathione peroxidase 3 (plasma)	1.49	1.42	1.28	-1.63	-1.42	-1.22	-1.24	-1.63	AW266929			GPX3	glutathione peroxidase 3 (plasma)	1.01	-1.05	-1.08	1.43	1.68	1.08	1.68	AW266929
189	CD81	CD81 molecule	1.07	1.19	-1.61	1.01	1.15	1.17	-1.14	-1.61	AW266934			CD81	CD81 molecule	1.26	1.31	1.28	1.07	1.1	-1.03	-1.18	1.31	AW266934			CD81	CD81 molecule	1.01	1.11	-1.53	1.28	1.36	1.17	-1.53	AW266934
190	Nup188		-1.19	1.41	-1.75	-1.15	1.12	-1.14	-1.33	-1.75	AW266945			Nup188		1.2	1.63	1.08	-1.41	-1.23	-1.22	-1.3	1.63	AW266945			Nup188		-1.09	-1.05	-1.55	1.52	1.62	1.07	1.62	AW266945	t480?
191	LOC782302	solute carrier family 25, member 32	-1.01	1.06	-1.06	-1.07	1.02	1.1	-1.09	1.1	AW266954			LOC782302	solute carrier family 25, member 32	1.2	1.03	1.08	1.05	1.16	1.12	-1.09	1.2	AW266954	t15? t60? t240? t480? t720?		LOC782302	solute carrier family 25, member 32	-1.2	1.14	-1.06	1.01	-1.07	1.05	-1.2	AW266954	t15? t60? t120? t480?
192	HPRT1	hypoxanthine phosphoribosyltransferase 1 (Lesch-Nyhan syndrome)	1	1.24	-1.25	1.16	1.17	1.23	1.02	-1.25	AW266966			HPRT1	hypoxanthine phosphoribosyltransferase 1 (Lesch-Nyhan syndrome)	1.29	1.13	1.08	1.13	1.1	1.09	-1.44	-1.44	AW266966	t15? t720?		HPRT1	hypoxanthine phosphoribosyltransferase 1 (Lesch-Nyhan syndrome)	-1.22	1.2	-1.1	1.24	1.19	1.18	1.24	AW266966
193	ADFP	adipose differentiation-related protein	-1.09	1.1	-1.21	1.13	-1.03	1.5	1.44	1.5	AW266968	t720?		ADFP	adipose differentiation-related protein	1.21	1.11	1.12	1.14	-1.03	1.39	1.09	1.39	AW266968	t15? t240? t480?		ADFP	adipose differentiation-related protein	-1.12	1.09	-1.18	1.1	1.1	1.05	-1.18	AW266968	t60? t120? t480?
194	PPP1CB	protein phosphatase 1, catalytic subunit, beta isoform	-1.05	1.16	1.92	1.38	-1.06	1.11	-1.04	1.92	AW266973			PPP1CB	protein phosphatase 1, catalytic subunit, beta isoform	-1.1	1.09	1.51	1.66	1.06	1.16	1.08	1.66	AW266973			PPP1CB	protein phosphatase 1, catalytic subunit, beta isoform	1.11	1.24	1.6	1.07	1.09	1.01	1.6	AW266973
195	MSH2	mutS homolog 2, colon cancer, nonpolyposis type 1 (E. coli)	1.05	1	1.08	1.04	-1.16	-1.04	1.01	-1.16	AW266974			MSH2	mutS homolog 2, colon cancer, nonpolyposis type 1 (E. coli)	1.08	1.05	1.1	-1.05	-1.1	-1.01	1.41	1.41	AW266974	t120? t240?		MSH2	mutS homolog 2, colon cancer, nonpolyposis type 1 (E. coli)	1.04	-1.07	1.02	1.17	1.04	-1.01	1.17	AW266974	t60? t120? t480?
196	Larp1	La ribonucleoprotein domain family, member 1	1.1	-1.24	1.34	1.21	1.1	-1.08	-1.1	1.34	AW266979			Larp1	La ribonucleoprotein domain family, member 1	-1.08	-1.08	1.21	1.81	1.25	1.09	1.08	1.81	AW266979			Larp1	La ribonucleoprotein domain family, member 1	1.44	1.07	1.4	-1.14	1.07	-1.1	1.44	AW266979
197	Nsl1		-1.06	-1.16	1.01	-1.15	-1.39	-1.16	-1.31	-1.39	AW266982			Nsl1		-1.34	1.05	-1.09	-1.11	-1.02	1.01	-1.08	-1.34	AW266982	t15?		Nsl1		1.27	-1.1	1.2	1.09	-1.17	-1.13	1.27	AW266982	t120?
198	AW266983		-1.21	-1.15	1.04	1.13	1.01	1.03	-1.07	-1.21	AW266983	t120?		AW266983	NSL1, MIND kinetochore complex component, homolog (S. cerevisiae)	-1.03	-1.05	1.04	1.47	1.09	1.15	1.03	1.47	AW266983			AW266983		-1.14	1.05	1.17	-1.08	1.03	-1.05	1.17	AW266983
199	Plekhc1		-1.22	-1.05	1.29	1.24	1.04	1.54	1.74	1.74	AW266985			Plekhc1		-1.03	-1.02	1.23	1.51	1.17	1.19	1.42	1.51	AW266985	t120?		Plekhc1		-1.13	1.1	1.17	-1.01	-1	1.28	1.28	AW266985	t120?
200	KIT	v-kit Hardy-Zuckerman 4 feline sarcoma viral oncogene homolog	-1.39	-1.16	-1.08	1.09	-1.09	1.12	1.3	-1.39	AW266986	t120? t720?		KIT	v-kit Hardy-Zuckerman 4 feline sarcoma viral oncogene homolog	1.05	-1	1	1.49	-1.08	1.15	1.22	1.49	AW266986	t60? t120? t240? t480?		KIT	v-kit Hardy-Zuckerman 4 feline sarcoma viral oncogene homolog	-1.19	-1.03	1.02	-1.16	1.09	1.03	-1.19	AW266986	t15? t30? t60? t120? t480?
201	KIT	v-kit Hardy-Zuckerman 4 feline sarcoma viral oncogene homolog	-1.24	1.05	-1.1	-1.03	1.08	1.07	1.19	-1.24	AW266987	t720?		KIT	v-kit Hardy-Zuckerman 4 feline sarcoma viral oncogene homolog	1.03	1.06	1	1.12	1.1	1.11	1.09	1.12	AW266987	t15? t30? t60? t120? t240? t480?		KIT	v-kit Hardy-Zuckerman 4 feline sarcoma viral oncogene homolog	-1.13	1.11	-1.06	-1.1	1.04	1.03	-1.13	AW266987	t15? t30? t60? t120? t240? t480?
202	Commd4	COMM domain containing 4	-1.03	1.14	1.01	1.07	-1.07	-1.29	-1.19	-1.29	AW266995	t720?		Commd4	COMM domain containing 4	-1.12	1.19	-1.01	-1.12	1	-1.1	-1.19	1.19	AW266995	t15? t60? t120? t240? t480? t720?		Commd4	COMM domain containing 4	1.12	1.01	1.05	1.29	1.02	-1.13	1.29	AW266995	t60? t120? t240? t480?
203	LOC788761		1.23	1.11	-1.1	1.12	1.05	-1	-1.13	1.23	AW267000	t15? t240?		LOC788761		1.4	1.03	1.06	1.15	1.16	1.06	1.02	1.4	AW267000	t15? t120? t240? t480?		LOC788761		1.05	1.16	-1.02	1.06	1.01	1.03	1.16	AW267000	t60? t120? t480?
204	CTGF	connective tissue growth factor	-1.04	-1.46	1.25	1.13	-1.07	-1.02	1.58	1.58	AW267007	t15? t240? t480?		CTGF	connective tissue growth factor	1.06	-1.74	1.04	-1.03	1.13	-1.09	1.22	-1.74	AW267007	t30? t60? t120? t240? t720?		CTGF	connective tissue growth factor	-1.12	1.15	1.36	1.3	1.01	1.09	1.36	AW267007	t15? t30? t60? t120? t240? t480?
205	NRAS	neuroblastoma RAS viral (v-ras) oncogene homolog	-1.06	1.03	-1.08	1	-1.08	1.05	1.06	-1.08	AW267011			NRAS	neuroblastoma RAS viral (v-ras) oncogene homolog	1.02	-1.02	1.25	1.12	-1.04	1.07	-1.01	1.25	AW267011	t240? t480?		NRAS	neuroblastoma RAS viral (v-ras) oncogene homolog	1.06	1.13	-1.2	1.03	1.06	1.02	-1.2	AW267011	t60? t120? t480?
206	PRPS1	phosphoribosyl pyrophosphate synthetase 1	-1.05	1.16	-1.37	1.11	1.09	1.18	1.08	-1.37	AW267013			PRPS1	phosphoribosyl pyrophosphate synthetase 1	1.14	1.09	1.15	1.26	-1.09	1.11	-1.14	1.26	AW267013			PRPS1	phosphoribosyl pyrophosphate synthetase 1	1.21	1.26	-1.13	1.18	1.5	-1.03	1.5	AW267013
207	LOC509666		1.11	-1.03	1.12	1.06	-1.09	1.13	1.06	1.13	AW267020	t480? t720?		LOC509666		1.16	-1.03	1.02	1.12	-1.02	1.16	1.2	1.2	AW267020	t15? t30? t60? t120? t240? t480?		LOC509666		1.08	1.1	1.13	-1.01	1.03	-1.01	1.13	AW267020	t30? t60? t120? t240? t480?
208	LOC519843		-1.01	-1.03	-1.06	-1.21	1.04	1.15	1.03	-1.21	AW267021	t15? t240? t480?		LOC519843		1.15	1.06	1.02	-1.06	1.06	1.11	-1.13	1.15	AW267021	t15? t30? t60? t240? t480? t720?		LOC519843		-1.08	-1.04	-1.01	1.02	1.04	1.06	-1.08	AW267021	t30? t60? t120? t480?
209	LOC531645		1.05	1.25	-1.35	-1.19	1.06	-1.12	-2.05	-2.05	AW267034			LOC531645		1.29	1.3	1.16	-1.69	1.09	-1.17	-1.37	-1.69	AW267034			LOC531645		-1.15	1.1	-1.25	1.93	1.13	1.06	1.93	AW267034
210	Ppil1	peptidylprolyl isomerase (cyclophilin)-like 1	1.07	1.24	-1.38	1.15	1.24	1.34	-1.13	-1.38	AW267037			Ppil1	peptidylprolyl isomerase (cyclophilin)-like 1	1.39	1.41	-1.09	1.37	1.07	1.17	-1.17	1.41	AW267037	t120?		Ppil1	peptidylprolyl isomerase (cyclophilin)-like 1	-1.1	-1.03	1.03	1.17	1.23	1.18	1.23	AW267037
211	EIF4G2	eukaryotic translation initiation factor 4 gamma, 2	-1.14	-1.05	1.46	1.89	1.04	1.67	1.61	1.89	AW267040			EIF4G2	eukaryotic translation initiation factor 4 gamma, 2	1.02	1.09	1.16	2.11	1.22	1.89	1.56	2.11	AW267040			EIF4G2	eukaryotic translation initiation factor 4 gamma, 2	-1.03	1.07	1.58	1.2	1.04	-1.09	1.58	AW267040
212	Plekhb2	pleckstrin homology domain containing, family B (evectins) member 2	-1.02	1.04	1.16	-1.04	-1.21	-1.03	1.03	-1.21	AW267045			Plekhb2	pleckstrin homology domain containing, family B (evectins) member 2	1.05	-1.25	1.29	1	-1.04	1.03	1.06	1.29	AW267045	t30? t60? t120? t480?		Plekhb2	pleckstrin homology domain containing, family B (evectins) member 2	1.01	1.4	1.04	1.03	-1.03	1	1.4	AW267045	t15? t30? t60? t120? t480?
213	C2orf43		1.03	1.07	1.2	-1.08	-1.24	-1.05	-1.15	-1.24	AW267048	t60? t240? t720?		C2orf43		-1.09	1.12	1.08	-1.05	-1.01	1.01	-1.03	1.12	AW267048	t15? t30? t60? t120? t240? t480?		C2orf43		1.18	1.07	1.12	1.05	-1.12	-1.04	1.18	AW267048	t30? t60? t120? t240? t480?
214	TncRNA		1.04	-1.02	1.1	1.02	-1.06	-1	1.09	1.1	AW267050	t720?		TncRNA		1.02	1.02	1.06	1.06	1.01	1.01	1.09	1.09	AW267050	t15? t30? t60? t120? t240? t480? t720?		TncRNA		1.14	1.13	1.08	1.02	1.06	1.12	1.14	AW267050	t15? t30? t60? t120? t240? t480?
215	POLR3F	polymerase (RNA) III (DNA directed) polypeptide F, 39 kDa	-1.23	1.08	-1.22	-1.04	1.06	-1.07	-1.18	-1.23	AW267053	t15? t720?		POLR3F	polymerase (RNA) III (DNA directed) polypeptide F, 39 kDa	-1.02	1.05	1.06	-1.02	1.1	1.07	-1.09	1.1	AW267053	t15? t60? t120? t240? t480? t720?		POLR3F	polymerase (RNA) III (DNA directed) polypeptide F, 39 kDa	-1.13	1.13	-1.15	1.1	-1.01	-1.08	-1.15	AW267053	t15? t30? t60? t120? t240? t480?
216	SULT1A4	sulfotransferase family, cytosolic, 1A, phenol-preferring, member 4 (EC:2.8.2.1)	1.05	1.18	1.01	-1.06	-1.5	1.06	-1.38	-1.5	AW267059			SULT1A4	sulfotransferase family, cytosolic, 1A, phenol-preferring, member 4 (EC:2.8.2.1)	-1.03	1.49	1.03	-1.14	-1.03	1.06	-1.13	1.49	AW267059	t15? t480?		SULT1A4	sulfotransferase family, cytosolic, 1A, phenol-preferring, member 4 (EC:2.8.2.1)	1.07	-1.15	1.11	1.26	-1.23	1.03	1.26	AW267059	t60? t120? t480?
217	LOC508666		-1.03	1.04	1.27	1.11	1.57	2.77	2.47	2.77	AW267060	t720?		LOC508666		1.09	1.21	1.01	1.13	1.46	1.49	1.65	1.65	AW267060	t60? t120? t240?		LOC508666		-1.02	-1.04	1.38	1.23	1.09	1.79	1.79	AW267060	t60? t120? t480?
218	Bt.9880		1.02	1.04	1.17	-1.02	-1.01	-1.04	-1.02	1.17	AW267062	t240? t720?		Bt.9880		1.02	1.29	1.04	-1.04	1.15	-1.02	1.05	1.29	AW267062	t15? t30? t60? t120? t240? t480? t720?		Bt.9880		1.11	-1.09	1.08	1.04	-1	1.08	1.11	AW267062	t15? t30? t60? t120? t240? t480?
219	HSPC148		-1.08	1.11	1.12	1.04	1.02	1.05	-1.08	1.12	AW267066			HSPC148		-1.08	1.09	1.22	1.17	1.06	1.08	1.01	1.22	AW267066			HSPC148		1.12	1.13	1.08	1.03	1.08	-1.02	1.13	AW267066	t120? t480?
220	Lass2	LAG1 homolog, ceramide synthase 2	-1.19	-1.09	-1.21	-1.41	1.41	1.29	-1.17	1.41	AW267074			Lass2	LAG1 homolog, ceramide synthase 2	1.16	-1.01	1.05	-1.11	1.76	1.19	-1.09	1.76	AW267074			Lass2	LAG1 homolog, ceramide synthase 2	-1.06	1.07	-1.02	1.05	-1.07	1.13	1.13	AW267074
221	LOC519148	no description	1.19	1.02	1.23	1.14	1.13	1.23	1.31	1.31	AW267077			LOC519148	no description	1.04	-1.23	1.04	1.16	1.27	1.15	1.34	1.34	AW267077	t60? t120? t240? t480?		LOC519148	no description	1.17	1.29	1.27	1.08	-1.07	1.05	1.29	AW267077	t60? t120? t480?
222	LOC519148	no description	-1.04	-1.05	1.17	-1.14	1.2	1.07	1.24	1.24	AW267078			LOC519148	no description	1.18	-1.12	1.21	1.07	1.26	1.15	1.13	1.26	AW267078			LOC519148	no description	-1.04	1.12	1.11	1.01	1.02	-1.01	1.12	AW267078
223	STCH		-1.07	-1.05	-1.06	-1.13	-1.02	1.26	1.2	1.26	AW267080	t15? t240? t720?		STCH		1.2	1.01	1.09	-1.13	1.24	1.09	-1.07	1.24	AW267080	t15? t240? t480? t720?		STCH		-1.13	-1.02	1.02	1.17	-1.14	1.15	1.17	AW267080
224	LOC784675		-1.01	-1.11	1.02	-1.26	1.12	1.19	1.02	-1.26	AW267088			LOC784675		1.11	-1	1.06	-1.16	1.06	1.1	-1.17	-1.17	AW267088	t15? t60? t240? t480?		LOC784675		-1.04	-1.04	1.03	1.08	1.13	1.09	1.13	AW267088	t60?
225	KIAA1462		-1.06	1.18	-1.33	-1.8	1.05	1.09	-1.08	-1.8	AW267089	t15? t30? t120? t240?		KIAA1462		-1.1	1.6	1.16	-1.8	1.05	-1.21	-1.43	-1.8	AW267089			KIAA1462		1.26	-1.32	-1.35	1.11	1.11	1.34	-1.35	AW267089	t30? t120? t240?
226	LOC616899		-1.03	1.1	-1.23	1.01	1.03	1.01	1.32	1.32	AW267095			LOC616899		1.34	1.06	-1.09	1.11	1.07	1.1	-1.05	1.34	AW267095	t15? t60? t120? t240? t480? t720?		LOC616899		-1.13	1.14	1.03	1.08	1.05	1.03	1.14	AW267095	t60? t480?
227	C10orf57		-1.01	-1.04	1.19	1.02	1.19	1.01	-1.12	1.19	AW267098			C10orf57		-1.03	-1.06	1.06	1.06	1.15	-1.01	1.14	1.15	AW267098	t15? t60? t120? t240? t480?		C10orf57		1.11	1.12	1.2	1.03	1.05	1.02	1.2	AW267098	t60? t120? t480?
228	MGC142623		-1.13	1.13	1.18	1.03	-1	1.22	-1.07	1.22	AW267101			MGC142623		-1.07	1.04	1.08	1.19	1.01	1.32	1.02	1.32	AW267101	t480?		MGC142623		1.02	1.22	1.25	1.02	1.09	-1.09	1.25	AW267101	t480?
229	LOC529312		1.02	-1.04	1.05	-1.11	1.03	1.14	1.01	1.14	AW267103			LOC529312		1.04	1.09	-1.03	1.01	1.09	1.16	1.09	1.16	AW267103	t60? t240? t480?		LOC529312		1.06	-1.01	1.2	1.06	-1.02	1.01	1.2	AW267103	t60? t120? t480?
230	LOC616994		-1.15	-1.2	1.11	-1.3	1.3	1.21	1.24	1.3	AW267107			LOC616994		-1.01	-1.03	1.1	1.01	1.29	1.31	1.09	1.31	AW267107			LOC616994		-1.02	-1	1.21	1.01	1.11	-1.04	1.21	AW267107
231	Bt.2600		-1.09	-1.02	1.1	-1.02	1.18	1.06	1.08	1.18	AW267109	t720?		Bt.2600		1.01	1.05	1	1.02	1.19	-1	1.1	1.19	AW267109	t15? t30? t60? t120? t240? t480?		Bt.2600		1.06	1.04	1.12	1.01	1.07	1.12	1.12	AW267109	t15? t30? t60? t120? t240? t480?
232	SC4MOL	sterol-C4-methyl oxidase-like	-1.31	-1.09	1.21	1.11	1.04	-1.14	1.06	-1.31	AW267111			SC4MOL	sterol-C4-methyl oxidase-like	-1.11	-1.17	1.45	1.14	1.01	-1.06	1.21	1.45	AW267111	t15? t30? t60? t120? t480?		SC4MOL	sterol-C4-methyl oxidase-like	-1.14	1.2	-1.05	1.09	1.16	-1.08	1.2	AW267111	t30? t480?
233	AW267112		-1.02	-1.04	1.01	-1	1.02	1.06	1.07	1.07	AW267112	t720?		AW267112		1.06	1.01	1.03	1.04	1.04	1.06	1.13	1.13	AW267112	t15? t30? t60? t120? t240? t480? t720?		AW267112		-1.01	1.09	-1	1.03	1.07	1.06	1.09	AW267112	t15? t30? t60? t120? t240? t480?
234	Ints6		-1.08	1.19	-1.38	1.03	1.1	1.17	1.08	-1.38	AW267114			Ints6		1.12	1.17	-1.04	1.22	1.11	1.14	-1.16	1.22	AW267114	t240?		Ints6		-1.08	1.11	-1.09	1.02	1.03	1.05	1.11	AW267114
235	LOC513412		1.32	-1.09	1.23	1.19	-1.22	-1.04	1.12	1.32	AW267117			LOC513412		1.17	1.05	1.13	1.16	-1.05	-1.05	1.37	1.37	AW267117			LOC513412		1.09	1.07	1.33	1.37	1.05	1.05	1.37	AW267117
236	Foxl2		1.24	1.04	1.08	1.06	-1.11	-1.06	1.03	1.24	AW267120	t720?		Foxl2		1.16	1.02	1	1.15	-1.09	-1	1.07	1.16	AW267120	t15? t60? t120? t240? t480? t720?		Foxl2		1.1	1.08	1.1	-1.04	1.12	1.05	1.12	AW267120	t60? t120? t480?
237	Taf2		1.08	1.19	-1.63	-1.01	1.21	1.11	-1.67	-1.67	AW267131	t15?		Taf2		1.27	1.27	1.06	-1	1.03	-1.06	-1.12	1.27	AW267131			Taf2		-1.08	1.13	-1.29	1.25	1.43	1.13	1.43	AW267131
238	Hps5		-1.1	1.12	1.2	-1.02	-1.08	1.1	-1.02	1.2	AW267134	t60? t720?		Hps5		-1.03	1.21	1.06	1.1	1.04	1.12	1.11	1.21	AW267134	t60? t120? t240? t480?		Hps5		1.12	1.02	1.18	-1.01	-1.02	-1.02	1.18	AW267134	t60? t120? t480?
239	LOC510165		-1.09	1.33	-1.9	-1.24	1.03	-1.06	-1.18	-1.9	AW267135	t15? t30? t60? t240?		LOC510165		1.11	1.43	-1.17	-1.08	-1.01	-1.3	-1.1	1.43	AW267135			LOC510165		-1.14	-1.06	-1.42	1.02	1.25	1.19	-1.42	AW267135	t480?
240	MGC139157		-1.27	-1	-1.3	-1.18	1.29	-1.18	-1.05	-1.3	AW267141	t240? t480? t720?		MGC139157		1.04	1.21	1.27	-1.23	1.16	-1.02	-1.17	1.27	AW267141	t15? t60? t120? t240? t480? t720?		MGC139157		-1.06	-1.13	-1.44	1.18	1.21	1.01	-1.44	AW267141	t15? t30? t60? t120? t240? t480?
241	Stau2	staufen (RNA binding protein) homolog 2 (Drosophila)	1.11	1.04	1.06	1.17	-1.2	1.01	1.12	-1.2	AW267147	t240?		Stau2	staufen (RNA binding protein) homolog 2 (Drosophila)	1.25	-1.11	1.13	1.13	1.07	-1.01	1.12	1.25	AW267147	t15? t60? t120? t480? t720?		Stau2	staufen (RNA binding protein) homolog 2 (Drosophila)	-1.02	1.18	1.07	1.16	-1.06	1.1	1.18	AW267147	t60? t240? t480?
242	ZNF302		1.22	-1.01	-1.01	1.12	-1.17	-1.04	1.04	1.22	AW267155			ZNF302		1.33	-1.03	1.13	1.3	-1.27	1.01	1.34	1.34	AW267155	t15?		ZNF302		1.04	1.15	-1.07	1.01	1.28	1.02	1.28	AW267155	t60? t120?
243	AW267156		1.01	-1.26	1.03	1.11	1.03	-1.05	1.12	-1.26	AW267156	t60? t240? t480?		AW267156	Transcribed locus	1.03	-1.21	1.03	-1	-1.04	-1.05	1.25	1.25	AW267156	t15? t30? t60? t120? t240? t480?		AW267156		1.11	1.12	1.02	1.16	1.23	1.12	1.23	AW267156	t30? t60? t120? t240? t480?
244	LOC540974		-1.03	-1.02	-1.06	1.09	-1.06	-1	1.1	1.1	AW267158			LOC540974		1.04	1.02	1.07	1.11	-1.1	-1.01	1.31	1.31	AW267158	t15? t30? t60? t120? t240? t480? t720?		LOC540974		1.09	1.1	-1.07	-1	1.15	1.11	1.15	AW267158	t30? t60? t120? t240? t480?
245	Arl6ip1	ADP-ribosylation factor-like 6 interacting protein 1	-1.04	-1.11	1.36	-1.1	-1.22	1.04	-1.36	1.36	AW267159			Arl6ip1	ADP-ribosylation factor-like 6 interacting protein 1	-1.29	1.02	1.15	1.19	1.16	1.15	1.07	-1.29	AW267159			Arl6ip1	ADP-ribosylation factor-like 6 interacting protein 1	1.4	1.09	1.49	1.06	-1.16	-1.06	1.49	AW267159
246	KIAA0776		1.03	1.04	1.19	1.01	-1.11	1.01	-1.05	1.19	AW289189	t15? t30? t60? t120? t240? t720?		KIAA0776		-1.08	1.19	-1.14	-1.03	1.01	1.02	1.01	1.19	AW289189	t15? t30? t60? t240? t480? t720?		KIAA0776		1.16	-1.11	1.29	1.1	-1.06	-1.01	1.29	AW289189	t15? t30? t60? t120? t240? t480?
247	Jmjd2b	jumonji domain containing 2B	-1.19	-1.25	1.16	-1.02	-1.3	-1.08	-1.14	-1.3	AW289202	t15? t30? t240?		Jmjd2b	jumonji domain containing 2B	-1.42	-1	-1.22	-1.13	1.15	-1.02	1.4	-1.42	AW289202			Jmjd2b	jumonji domain containing 2B	1.28	-1.04	1.43	1.22	-1.31	1.01	1.43	AW289202
248	RHOH	ras homolog gene family, member H	-1.14	1.27	-1.58	1.28	1.61	1.45	2.17	2.17	AW289213			RHOH	ras homolog gene family, member H	-1.02	1.62	-1.13	1.51	1.1	1.52	-1.22	1.62	AW289213	t720?		RHOH	ras homolog gene family, member H	-1.06	-1.1	-1.07	1.14	1.46	-1.06	1.46	AW289213	t30?
249	TICAM2	toll-like receptor adaptor molecule 2	1	-1.01	1.12	1.04	-1.11	1.4	1.28	1.4	AW289215	t720?		TICAM2	toll-like receptor adaptor molecule 2	1.12	-1.02	1.03	1.23	1.03	1.44	1.23	1.44	AW289215	t15? t60? t120? t480?		TICAM2	toll-like receptor adaptor molecule 2	1	1.1	1.18	-1.07	-1.05	1.01	1.18	AW289215	t60? t120? t480?
250	SFRS3	splicing factor, arginine/serine-rich 3	-1.36	1.11	1.51	1.1	-1.11	1.39	1.01	1.51	AW289216			SFRS3	splicing factor, arginine/serine-rich 3	-1.21	-1.13	1.21	1.08	1.11	1.32	-1.02	1.32	AW289216			SFRS3	splicing factor, arginine/serine-rich 3	-1.03	1.48	1.55	1.35	-1.03	-1	1.55	AW289216
251	ORC5L	origin recognition complex, subunit 5-like (yeast)	-1.18	1.08	-1	1.14	-1.13	1.03	1.07	-1.18	AW289217			ORC5L	origin recognition complex, subunit 5-like (yeast)	1.11	-1.11	1.01	1.13	-1.05	1.07	1.12	1.13	AW289217	t15? t30? t60? t120? t240? t480? t720?		ORC5L	origin recognition complex, subunit 5-like (yeast)	-1.13	1.31	1.1	1.1	1.06	1.04	1.31	AW289217	t15? t30? t60? t120? t480?
252	SUPT4H1	suppressor of Ty 4 homolog 1 (S. cerevisiae)	1.05	-1.07	1.02	-1.05	1.32	1.11	1.28	1.32	AW289220	t720?		SUPT4H1	suppressor of Ty 4 homolog 1 (S. cerevisiae)	1.07	-1.01	1.05	1.07	1.18	1.13	1.22	1.22	AW289220	t15? t60? t120? t240? t480?		SUPT4H1	suppressor of Ty 4 homolog 1 (S. cerevisiae)	1.13	1.02	1.06	-1.02	1.12	1.02	1.13	AW289220	t30? t60? t120? t480?
253	ZCD2		1.04	-1.12	1.37	1.21	1.07	-1.05	-1.08	1.37	AW289221			ZCD2		-1.02	-1.14	1.3	1.38	1.02	1.19	1.54	1.54	AW289221			ZCD2		1.28	1.19	1.22	1.09	1.24	-1.2	1.28	AW289221
254	HOP		1.03	1.11	-1.12	-1.22	1.02	1.1	-1.09	-1.22	AW289223			HOP		1.22	1.21	1.08	-1.23	-1.1	1.13	-1.25	-1.25	AW289223	t15? t120? t240? t480? t720?		HOP		-1.01	-1.04	-1.03	1.14	1.19	-1.01	1.19	AW289223	t60? t120? t480?
255	Tloc1	translocation protein 1	-1.16	1.07	1.3	1.07	1.02	1.21	-1.05	1.3	AW289224			Tloc1	translocation protein 1	-1.15	-1.04	1.13	1.29	1.2	1.12	1.23	1.29	AW289224			Tloc1	translocation protein 1	1.27	1.26	1.34	1.03	-1.02	1.07	1.34	AW289224
256	CCNH	cyclin H	-1.05	1.01	1.15	1.05	1.02	1.02	-1.09	1.15	AW289226	t720?		CCNH	cyclin H	-1.01	1.15	1.13	1.1	1.03	1.06	-1.11	1.15	AW289226	t480?		CCNH	cyclin H	-1.01	-1.01	1.17	1.14	1.08	-1.03	1.17	AW289226	t60? t120? t480?
257	Il17rd	interleukin 17 receptor D	1.03	-1.07	1.21	-1.18	1.18	1.05	1.05	1.21	AW289230	t720?		Il17rd	interleukin 17 receptor D	1.04	1.02	1.06	-1.04	1.03	1.1	1.06	1.1	AW289230	t15? t30? t60? t120? t240? t480?		Il17rd	interleukin 17 receptor D	1.05	-1.03	1.11	-1.04	1.15	1	1.15	AW289230	t30? t60? t120? t480?
258	FILIP1L	filamin A interacting protein 1-like	-1.2	1.16	-1.11	-1.14	1.11	1.04	-1.07	-1.2	AW289233			FILIP1L	filamin A interacting protein 1-like	-1.02	1.09	1.03	1.08	1.23	1.07	1.05	1.23	AW289233	t60? t480?		FILIP1L	filamin A interacting protein 1-like	-1.03	1.14	-1.03	-1.06	-1.06	1.03	1.14	AW289233	t60? t120? t480?
259	Wdr32		-1.11	-1.12	1.05	1.11	1.1	-1.1	1.17	1.17	AW289238			Wdr32		-1.02	1.01	-1.05	1.2	-1.02	1.05	1.12	1.2	AW289238	t15? t60? t120? t720?		Wdr32		-1.12	-1.1	1.13	1.03	1.28	-1.07	1.28	AW289238	t15? t30? t60? t120? t480?
260	ANKRD44	ankyrin repeat domain 44	-1.24	1.17	-1.34	1.02	1.19	1.07	-1.37	-1.37	AW289239	t15? t720?		ANKRD44	ankyrin repeat domain 44	1.04	1.3	1.07	-1.02	-1.02	1.01	-1.23	1.3	AW289239	t240? t480?		ANKRD44	ankyrin repeat domain 44	-1.18	1.02	-1.18	1.19	1.31	1.06	1.31	AW289239	t15? t480?
261	Dnmt3a	RIKEN cDNA 4833432E10 gene	-1.26	1.33	-2.51	-1.05	-1.07	1.04	-1.25	-2.51	AW289242	t15?		Dnmt3a	RIKEN cDNA 4833432E10 gene	1.45	1.85	-1.19	-1.13	-1.54	-1.27	-1.5	1.85	AW289242			Dnmt3a	RIKEN cDNA 4833432E10 gene	-1.65	-1.13	-1.65	1.44	1.8	1.37	1.8	AW289242
262	Ube1c	ubiquitin-like modifier activating enzyme 3	-1.28	1.11	-1.34	-1.1	1.07	1.01	-1.06	-1.34	AW289243	t15? t30? t240? t480?		Ube1c	ubiquitin-like modifier activating enzyme 3	-1.04	1.18	1.04	-1.04	1.18	1	-1.24	-1.24	AW289243	t15? t60? t240? t480? t720?		Ube1c	ubiquitin-like modifier activating enzyme 3	-1.04	1.02	-1.2	1.06	-1.07	1.03	-1.2	AW289243	t15? t30? t60? t480?
263	LOC777773		1.44	-1.3	1.39	1.73	-1.24	1.15	1.38	1.73	AW289251	t15? t120?		LOC777773		1.27	1.16	1.07	1.79	1.03	1.32	1.62	1.79	AW289251	t480?		LOC777773		1.08	-1.31	1.36	1.21	-1.11	1.03	1.36	AW289251
264	MGC128732	no description	-1.39	1.04	-1.07	1.09	-1.09	1.01	-1.03	-1.39	AW289255			MGC128732	no description	-1.17	1.05	1.09	1.1	-1.15	1.06	1.17	1.17	AW289255	t30? t60? t120? t240? t480?		MGC128732	no description	-1.03	1.1	-1.1	1.04	1.15	1.03	1.15	AW289255	t30? t60? t120? t240? t480?
265	Metap2	methionine aminopeptidase 2	-1.01	1.04	-1.12	1.06	-1.05	1.04	1.27	1.27	AW289258			Metap2	methionine aminopeptidase 2	1.16	-1	1.1	1.13	-1.19	1.06	1.16	-1.19	AW289258	t15? t60? t240? t480? t720?		Metap2	methionine aminopeptidase 2	-1	1.14	-1.16	1.02	1.23	1.05	1.23	AW289258	t60? t120? t240? t480?
266	KIAA1509		-1.01	1.07	-1.16	1.11	1.04	-1.1	1.02	-1.16	AW289268			KIAA1509		1.08	-1.02	1.12	1.21	-1.04	1.02	1.36	1.36	AW289268			KIAA1509		1.1	1.17	-1.14	1.09	1.22	-1.03	1.22	AW289268	t480?
267	FLJ38020		-1.01	1.07	-1.03	1.04	1.08	-1.03	1.45	1.45	AW289302			FLJ38020		1.1	-1.02	1	1.25	1.06	1.12	1.95	1.95	AW289302	t120? t720?		FLJ38020		1.1	1.15	1.01	-1.07	1.11	-1.07	1.15	AW289302	t60? t120? t480?
268	IER2	immediate early response 2	-1.14	1.23	-1.11	-1.03	1.58	1.89	1.05	1.89	AW289324			IER2	immediate early response 2	1.02	1.27	1.25	1.33	1.46	1.49	1.29	1.49	AW289324			IER2	immediate early response 2	1.24	1.17	1.04	1.04	1.34	1.3	1.34	AW289324
269	ATP2A3	ATPase, Ca++ transporting, ubiquitous	1.19	1.24	-1.55	1.05	1.18	1.18	-1.25	-1.55	AW289347			ATP2A3	ATPase, Ca++ transporting, ubiquitous	1.25	1.21	-1.01	1.75	1.02	1.21	-1.05	1.75	AW289347			ATP2A3	ATPase, Ca++ transporting, ubiquitous	1.23	1.23	-1.09	-1.2	1.42	-1	1.42	AW289347
270	Dapp1	dual adaptor for phosphotyrosine and 3-phosphoinositides 1	-1.32	1.15	-1.65	1.19	1.22	1.61	1.34	-1.65	AW289359			Dapp1	dual adaptor for phosphotyrosine and 3-phosphoinositides 1	-1.08	1.09	-1.18	1.61	1.1	1.35	-1.13	1.61	AW289359			Dapp1	dual adaptor for phosphotyrosine and 3-phosphoinositides 1	-1.13	1.21	-1.06	-1.04	1.28	1.17	1.28	AW289359
271	NOL1	nucleolar protein 1, 120kDa	-1.14	-1.05	-1.09	-1.07	-1.16	-1.01	-1.04	-1.16	AW289388			NOL1	nucleolar protein 1, 120kDa	1.04	-1.03	1.16	1.05	1.01	1.09	1.15	1.16	AW289388	t15? t60? t120? t240? t480?		NOL1	nucleolar protein 1, 120kDa	-1.1	1.09	-1.19	-1.01	-1.01	1.01	-1.19	AW289388	t60? t120? t480?
272	C6orf62		-1.14	1	1.07	1.22	-1.02	-1.13	-1.1	1.22	AW289414			C6orf62		-1.11	-1.09	1.29	1.09	1.01	-1.01	1.14	1.29	AW289414	t60? t480?		C6orf62		1.06	1.12	-1.13	1.27	1.09	-1.08	1.27	AW289414	t15? t30? t480?
273	Emr1	egf-like module containing, mucin-like, hormone receptor-like 1	-1.13	1.06	1.12	1.03	1.6	2.5	3.89	3.89	AW312229	t120? t240? t480? t720?		Emr1	egf-like module containing, mucin-like, hormone receptor-like 1	-1.08	1.1	1.06	1.11	1.36	1.44	1.43	1.44	AW312229	t15? t30? t60? t120? t240? t480?		Emr1	egf-like module containing, mucin-like, hormone receptor-like 1	1.16	1.06	1.1	-1	1.18	1.66	1.66	AW312229	t15? t30? t60? t120? t240?
274	Hey2	hairy/enhancer-of-split related with YRPW motif 2	-1.03	-1.03	-1.01	-1.02	1.05	-1.16	-1.01	-1.16	AW313533	t240? t480? t720?		Hey2	hairy/enhancer-of-split related with YRPW motif 2	1.02	1.1	1.07	-1.08	1.1	-1.04	1.18	1.18	AW313533	t15? t30? t60? t120? t240? t480? t720?		Hey2	hairy/enhancer-of-split related with YRPW motif 2	1.13	1.02	-1.05	1.05	1.11	1.06	1.13	AW313533	t15? t30? t60? t120? t240? t480?
275	MGC127769		-1.16	1.07	-1.31	-1.07	1.09	1.11	-1.16	-1.31	AW314461			MGC127769		1.04	1.11	-1.11	-1.02	1.09	-1.13	-1.35	-1.35	AW314461	t15? t240? t480? t720?		MGC127769		-1.21	1.05	-1.06	1.16	1.11	1.25	1.25	AW314461	t60? t480?
276	GGTL3	gamma-glutamyltransferase 7	-1.27	-1.25	1.24	1.38	-1.07	-1.5	1.21	-1.5	AW314824	t15?		GGTL3	gamma-glutamyltransferase 7	-1.13	-1.31	1.42	1.09	1.06	-1.49	1.85	1.85	AW314824			GGTL3	gamma-glutamyltransferase 7	1.08	1.27	-1.02	1.49	1.07	1.03	1.49	AW314824
277	UNC93A	unc-93 homolog A (C. elegans)	-1.07	-1.04	1.07	-1.05	-1.01	-1.02	-1.07	1.07	AW315474			UNC93A	unc-93 homolog A (C. elegans)	1.02	-1.04	1.19	1.14	-1.04	1.08	1.06	1.19	AW315474	t15? t60? t240? t480?		UNC93A	unc-93 homolog A (C. elegans)	1.1	1.08	-1.11	-1.09	1.19	-1	1.19	AW315474	t60? t120? t480?
278	BCL7B	B-cell CLL/lymphoma 7B	-1.03	1.09	-1.37	-1.03	1.15	1.01	-1.13	-1.37	AW315849			BCL7B	B-cell CLL/lymphoma 7B	-1.08	1.05	1.07	1.07	1.18	-1.01	1.01	1.18	AW315849	t240?		BCL7B	B-cell CLL/lymphoma 7B	1.41	1.17	-1.17	1.12	1.08	1.01	1.41	AW315849	t15?
279	TBCE	tubulin folding cofactor E	-1.07	-1.02	-1.4	-1.22	1.06	1.02	-1.36	-1.4	AW325554	t15? t480? t720?		TBCE	tubulin folding cofactor E	1.24	1.28	-1.04	-1.22	1.17	-1.06	-1.09	1.28	AW325554	t15? t120? t240? t480?		TBCE	tubulin folding cofactor E	-1.06	-1.18	-1.17	1.18	-1.02	1.11	1.18	AW325554	t15? t30? t60? t120? t240? t480?
280	Colec12	collectin sub-family member 12	1.03	1.14	-1.65	-1.25	1.03	1.03	-1.39	-1.65	AW326160			Colec12	collectin sub-family member 12	1.64	1.5	1.14	-1.06	1.05	-1.23	-1.17	1.64	AW326160			Colec12	collectin sub-family member 12	-1.42	-1.07	-1.52	1.14	1.2	1.32	-1.52	AW326160
281	Ela3b	elastase 3, pancreatic	-1.07	-1.08	-1.04	1.04	-1.12	-1.12	-1.21	-1.21	AW326244			Ela3b	elastase 3, pancreatic	-1.18	1.15	1.07	1.34	1.19	1	1.53	1.53	AW326244			Ela3b	elastase 3, pancreatic	1.19	-1.01	-1.09	-1.14	-1.08	-1.09	1.19	AW326244
282	GPC1	glypican 1	1.31	-1.12	1.53	1.2	-1.05	-1.02	1.24	1.53	AW326516			GPC1	glypican 1	1.14	-1.04	1.15	1.3	-1.06	-1.02	1.71	1.71	AW326516			GPC1	glypican 1	1.09	1.05	1.49	1.05	1.18	1.02	1.49	AW326516
283	CD33	CD33 molecule	1.04	1.13	1.18	-1.03	1.06	1.03	-1.11	1.18	AW326713	t720?		CD33	CD33 molecule	1	1	1.01	1.05	1.12	1.05	1.01	1.12	AW326713	t15? t30? t60? t120? t240? t480? t720?		CD33	CD33 molecule	1.13	1.3	1.11	-1.05	1.04	1.04	1.3	AW326713	t30? t60? t120? t240? t480?
284	Mipep	mitochondrial intermediate peptidase	-1.03	1.04	-1.23	1.01	-1.09	-1.01	-1.25	-1.25	AW326887			Mipep	mitochondrial intermediate peptidase	1.05	-1.02	1.26	1.05	1.02	1.05	-1.05	1.26	AW326887			Mipep	mitochondrial intermediate peptidase	-1.01	1.22	-1.25	1.14	1.08	-1.05	-1.25	AW326887
285	RFC1	solute carrier family 19 (sodium/hydrogen exchanger), member 1	-1.01	1.03	-1.34	-1.2	-1.03	1.19	-1.12	-1.34	AW327237	t720?		RFC1	solute carrier family 19 (sodium/hydrogen exchanger), member 1	1.17	1.17	1.01	-1.03	1	1.23	-1.24	-1.24	AW327237	t240? t480? t720?		RFC1	solute carrier family 19 (sodium/hydrogen exchanger), member 1	-1.05	-1.09	-1.14	1.03	1.05	-1.01	-1.14	AW327237	t60? t480?
286	Bbs9		1.41	1.07	1.08	1.04	-1.09	1.06	1.22	1.41	AW335793			Bbs9		1.4	1.12	1.07	1.12	-1.02	1.12	1.16	1.4	AW335793			Bbs9		1	1.06	1.07	1.08	1.12	1	1.12	AW335793
287	CPT1B	carnitine palmitoyltransferase 1b, muscle	1.4	-1.19	-1.1	1	-1.11	1.07	1.06	1.4	AW336348	t15?		CPT1B	carnitine palmitoyltransferase 1b, muscle	1.6	-1.05	1.04	1.18	1.03	1.11	1.18	1.6	AW336348			CPT1B	carnitine palmitoyltransferase 1b, muscle	1.05	1.06	1.09	1.01	1.09	1.04	1.09	AW336348
288	Adam15	a disintegrin and metallopeptidase domain 15 (metargidin)	1.04	-1.09	-1.46	1.05	1.13	1.2	-1.31	-1.46	AW336450			Adam15	a disintegrin and metallopeptidase domain 15 (metargidin)	1.43	1.18	1.24	1.28	1.02	1.11	1.15	1.43	AW336450			Adam15	a disintegrin and metallopeptidase domain 15 (metargidin)	-1.11	-1.04	-1.48	1.11	1.4	1.12	-1.48	AW336450
289	Sgca	sarcoglycan, alpha (dystrophin-associated glycoprotein)	1.35	-1.07	1.05	1.27	1	1.01	-1.1	1.35	AW336555			Sgca	sarcoglycan, alpha (dystrophin-associated glycoprotein)	1.43	-1.08	1.09	1.65	-1.1	1.07	1.45	1.65	AW336555			Sgca	sarcoglycan, alpha (dystrophin-associated glycoprotein)	1.24	1.21	-1.04	1.02	1.38	1.03	1.38	AW336555
290	Slc15a3	solute carrier family 15, member 3	1.35	-1.01	1.46	1.05	1.02	1.36	1.13	1.46	AW336922	t30? t60? t120? t240?		Slc15a3	solute carrier family 15, member 3	1.03	-1.39	1.14	1.17	1.32	1.24	1.19	-1.39	AW336922	t30? t60?		Slc15a3	solute carrier family 15, member 3	1.45	1.42	1.39	1.03	-1.13	1.06	1.45	AW336922	t30?
291	Itgb1bp3	integrin beta 1 binding protein 3	1.09	-1.42	1.37	-1.34	-1.37	-1.1	-1.16	-1.42	AW344941	t15?		Itgb1bp3	integrin beta 1 binding protein 3	-1.45	1.03	1.13	-1.4	-1.05	1.23	1.02	-1.45	AW344941	t15?		Itgb1bp3	integrin beta 1 binding protein 3	1.75	-1.2	1.47	1.32	-1.09	-1.27	1.75	AW344941	t15?
292	HOXC11	homeobox C11	1.38	-1.07	1.03	-1.04	-1.02	-1.02	-1.29	1.38	AW345084			HOXC11	homeobox C11	1.18	1.03	-1.02	1.07	1.07	1.08	1.03	1.18	AW345084			HOXC11	homeobox C11	1.17	1.13	1.29	1.12	1.04	-1.02	1.29	AW345084
293	Axud1		-1.09	-1.09	1.18	-1.07	1.11	1.06	1.24	1.24	AW345830			Axud1		1.05	-1.07	1.14	1.45	1.16	1.16	1.36	1.45	AW345830			Axud1		-1	1.2	1.2	-1.22	1.12	-1.01	-1.22	AW345830
294	Ddx20	DEAD (Asp-Glu-Ala-Asp) box polypeptide 20	1.2	1.1	1.23	1.13	-1.04	1.44	-1	1.44	AW346328			Ddx20	DEAD (Asp-Glu-Ala-Asp) box polypeptide 20	1.14	1.09	1.18	1.39	1.02	1.32	1.13	1.39	AW346328	t30? t60?		Ddx20	DEAD (Asp-Glu-Ala-Asp) box polypeptide 20	1.23	1.13	1.22	1	1.09	1.06	1.23	AW346328	t30?
295	MVK	mevalonate kinase	1.15	1.11	1.05	-1.39	1.04	1.02	1.05	-1.39	AW352922	t15? t30? t120? t240? t480? t720?		MVK	mevalonate kinase	1.04	1.12	-1.05	-1.29	-1.03	-1.07	-1.16	-1.29	AW352922	t15? t30? t120? t240? t480? t720?		MVK	mevalonate kinase	1.25	-1.09	1.11	1.05	1.24	1.08	1.25	AW352922	t120? t480?
296	Slc23a2	solute carrier family 23 (nucleobase transporters), member 2	-1	1.12	1.02	1.17	-1.04	1.12	1.24	1.24	AW354293			Slc23a2	solute carrier family 23 (nucleobase transporters), member 2	-1.02	1.01	1.14	1.15	-1.08	1.09	1.32	1.32	AW354293	t15? t60? t240? t480?		Slc23a2	solute carrier family 23 (nucleobase transporters), member 2	1.27	1.24	-1.04	1.13	1.21	1.04	1.27	AW354293	t60? t480?
297	CD53	CD53 molecule	1.03	1.17	1.01	1.11	-1.11	1.15	1.49	1.49	AW354477	t30?		CD53	CD53 molecule	1.18	1.04	1.2	1.21	-1.23	1.22	1.1	-1.23	AW354477	t240?		CD53	CD53 molecule	1.02	1.21	-1.08	1.09	1.27	-1.03	1.27	AW354477	t60? t120? t480?
298	IRF2	interferon regulatory factor 2	1.05	-1.01	1.5	1.1	-1.47	1.23	-1.01	1.5	AW356560	t30? t60? t120? t240? t720?		IRF2	interferon regulatory factor 2	-1.07	1.22	1.25	1.12	-1.07	1.28	1.06	1.28	AW356560	t60?		IRF2	interferon regulatory factor 2	1.24	-1.09	1.24	1.17	-1.16	-1.04	1.24	AW356560	t60? t120? t480?
299	MAP1A		-1.04	1.3	-1.08	-1.09	1.08	-1.37	-1.63	-1.63	AW357083	t15? t30? t60? t240?		MAP1A		1.22	1.06	1.37	-1.22	1.03	-1.41	-1.19	-1.41	AW357083	t30? t240?		MAP1A		-1.07	1.42	-1.27	1.31	1.26	-1.02	1.42	AW357083	t240? t480?
300	CDC6	cell division cycle 6 homolog (S. cerevisiae)	1.17	1.1	-1.01	1.05	-1.16	1.05	-1.14	1.17	AW357584			CDC6	cell division cycle 6 homolog (S. cerevisiae)	1.2	1.1	1.15	1.39	-1.06	1.04	1.32	1.39	AW357584	t720?		CDC6	cell division cycle 6 homolog (S. cerevisiae)	1.09	1.07	-1.04	-1.08	1.09	1.02	1.09	AW357584
301	Slc30a6	solute carrier family 30 (zinc transporter), member 6	1.04	-1.05	-1.05	1.07	-1.23	1.04	-1.06	-1.23	AW358065			Slc30a6	solute carrier family 30 (zinc transporter), member 6	1.26	1.02	1.11	1.23	-1.06	1.05	1.27	1.27	AW358065	t15?		Slc30a6	solute carrier family 30 (zinc transporter), member 6	-1.05	1.05	-1.06	1.02	1.06	1.02	1.06	AW358065
302	Acrbp	acrosin binding protein	1.06	1.05	-1.04	-1	-1.05	-1.06	1.02	1.06	AW358264	t15? t30? t240? t720?		Acrbp	acrosin binding protein	-1	1.21	-1.06	1.01	1.1	-1.03	1.01	1.21	AW358264	t15? t30? t60? t120? t240? t480? t720?		Acrbp	acrosin binding protein	1.17	-1.05	1.01	1.04	-1.08	1.05	1.17	AW358264	t30? t60? t120? t240? t480?
303	SFXN2	sideroflexin 2	1.17	1.17	1.29	-1.14	-1.38	-1.06	1.03	-1.38	AW358407	t15? t30? t60? t120?		SFXN2	sideroflexin 2	1.07	1.13	1.25	-1.01	-1.04	1.06	1.38	1.38	AW358407			SFXN2	sideroflexin 2	1.22	1.06	1.17	1.07	-1.1	1	1.22	AW358407
304	Hdac11	histone deacetylase 11	1.32	1.05	-1.1	1.13	-1.19	1.02	1.05	1.32	AW358498			Hdac11	histone deacetylase 11	1.09	-1	-1.02	1.49	-1.02	1.19	1.33	1.49	AW358498			Hdac11	histone deacetylase 11	1.14	1.23	1.02	-1.08	1.05	-1.13	1.23	AW358498
305	COL15A1	collagen, type XV, alpha 1	1.06	1.1	1.04	-1.01	-1.08	-1.02	1.35	1.35	AW358588	t120?		COL15A1	collagen, type XV, alpha 1	1.18	-1.01	1.17	1.09	1.08	1.02	1.34	1.34	AW358588	t480?		COL15A1	collagen, type XV, alpha 1	-1.02	1.2	-1.06	-1.05	-1.02	-1.01	1.2	AW358588	t60? t120? t480?
306	ZNF83		1.18	-1.13	1.03	1.33	-1.77	-1.16	1.02	-1.77	AW359136			ZNF83		-1.22	1.43	1.21	-1.19	-1.11	-1.2	1.56	1.56	AW359136	t120? t720?		ZNF83		1.57	-1.31	1.05	1.08	-1.32	1.06	1.57	AW359136
307	ADCY8	adenylate cyclase 8 (brain)	-1.09	1.2	1.07	-1.78	-1.31	1.14	1.15	-1.78	AW415585	t15?		ADCY8	adenylate cyclase 8 (brain)	-1.12	1.21	1.02	-2.26	1.03	1.01	-1.06	-2.26	AW415585			ADCY8	adenylate cyclase 8 (brain)	1.21	1.22	1.31	1.7	-1.13	1.17	1.7	AW415585
308	AP3B2	adaptor-related protein complex 3, beta 2 subunit	-1.15	1.08	-1.26	-1.15	1.06	-1	-1.26	-1.26	AW415685	t15?		AP3B2	adaptor-related protein complex 3, beta 2 subunit	1.03	1.06	1.1	1.05	1.05	1.06	-1.36	-1.36	AW415685	t15?		AP3B2	adaptor-related protein complex 3, beta 2 subunit	-1	1.07	-1.19	1.02	1.11	-1.01	-1.19	AW415685
309	Gfpt2	glutamine fructose-6-phosphate transaminase 2	1.07	-1.01	1.1	-1.09	1.13	1.27	1.21	1.27	AW417295			Gfpt2	glutamine fructose-6-phosphate transaminase 2	1	1.14	-1.03	-1	1.17	1.09	-1.11	1.17	AW417295	t240? t480? t720?		Gfpt2	glutamine fructose-6-phosphate transaminase 2	1.14	-1.12	1.08	1	1.03	1.18	1.18	AW417295	t30? t60? t120? t480?
310	Lmbr1l	limb region 1 like	1.13	-1.12	-1.05	-1.25	-1.32	1.02	-1.17	-1.32	AW417780			Lmbr1l	limb region 1 like	1.16	1.11	1.02	1.03	1.09	1.14	-1.17	-1.17	AW417780			Lmbr1l	limb region 1 like	1.04	-1.13	1.06	-1.04	-1.2	-1.06	-1.2	AW417780
311	MYD88	myeloid differentiation primary response gene (88)	1.42	-1.1	1.22	1.19	-1.05	1.09	1.29	1.42	AW417858	t15? t30? t120?		MYD88	myeloid differentiation primary response gene (88)	1.11	1.03	1.15	1.28	1.17	1.05	1.63	1.63	AW417858			MYD88	myeloid differentiation primary response gene (88)	1.29	-1.03	1.17	1.04	-1.05	1.09	1.29	AW417858
312	LYK5		-1.01	-1.11	1.3	1.02	-1.25	-1.25	-1.05	1.3	AW425698			LYK5		1.12	-1.23	1.23	1.13	-1.15	-1.04	1.56	1.56	AW425698			LYK5		1.1	1.28	1.15	1.05	1.16	-1.13	1.28	AW425698	t120? t480?
313	NUP153	nucleoporin 153kDa	1.21	1.41	1.03	1.01	1.31	1.19	1.09	1.41	AW426500			NUP153	nucleoporin 153kDa	1.26	1.12	1.05	1.11	1.32	1.11	1.07	1.32	AW426500	t60?		NUP153	nucleoporin 153kDa	1.02	1.32	1.2	1.13	1.03	1.15	1.32	AW426500
314	Celsr1	cadherin, EGF LAG seven-pass G-type receptor 1 (flamingo homolog, Drosophila)	1.09	-1.24	-1.03	-1.25	1.01	1.2	-1.05	-1.25	AW426525	t15? t240?		Celsr1	cadherin, EGF LAG seven-pass G-type receptor 1 (flamingo homolog, Drosophila)	1.3	-1.02	1.23	-1.28	1.1	1.1	-1.18	1.3	AW426525	t720?		Celsr1	cadherin, EGF LAG seven-pass G-type receptor 1 (flamingo homolog, Drosophila)	-1.13	-1.1	-1.11	1.21	1.03	1.12	1.21	AW426525
315	Bt.33129		1.08	1.04	1.12	-1.01	-1.06	-1.14	-1.12	-1.14	AW426569	t240?		Bt.33129		-1.17	1.04	-1.2	1.04	1.02	-1.1	1	-1.2	AW426569	t15? t120? t240? t480?		Bt.33129		1.24	-1.02	1.3	1.03	1.09	-1.02	1.3	AW426569	t15? t30? t60? t120? t480?
316	UCRC	ubiquinol-cytochrome c reductase complex (7.2 kD)	1.03	-1.22	1.48	1.06	-1.04	1.04	-1.48	1.48	AW427536			UCRC	ubiquinol-cytochrome c reductase complex (7.2 kD)	-1.08	-1.1	1.17	1.3	1.41	1.06	1.16	1.41	AW427536			UCRC	ubiquinol-cytochrome c reductase complex (7.2 kD)	1.36	1.1	1.6	1.13	-1.2	-1.04	1.6	AW427536
317	Bt.1453		-1.08	-1.03	-1.14	1.03	-1.14	-1.03	1.28	1.28	AW428584	t15? t30? t60? t120? t240? t720?		Bt.1453		-1.34	1.05	-1.15	1.22	1.15	-1.24	1.51	1.51	AW428584	t15?		Bt.1453		1.14	1.01	-1.03	-1.1	-1.12	1.29	1.29	AW428584	t60? t120?
318	MGC127353		-1.19	1.03	-1.01	-1.31	1.17	1.14	1.13	-1.31	AW428597			MGC127353		1.21	1.27	1.03	-1.46	1.33	1.05	-1.07	-1.46	AW428597			MGC127353		-1.19	-1.11	1.22	1.42	-1.02	1.08	1.42	AW428597
319	Cul7		1.07	-1.02	-1.31	-1.22	1.28	-1.05	-1.25	-1.31	AW430313			Cul7		1.25	1.49	1.1	-1.57	1.21	-1.11	-1.1	-1.57	AW430313			Cul7		1	-1.31	-1.14	1.57	1.17	1.13	1.57	AW430313
320	Nck2	non-catalytic region of tyrosine kinase adaptor protein 2	1.08	1.01	-1.24	-1.04	1.14	1.16	1.03	-1.24	AW437314	t15?		Nck2	non-catalytic region of tyrosine kinase adaptor protein 2	1.42	1.2	-1.02	1.18	1.21	1.04	-1.1	1.42	AW437314	t15?		Nck2	non-catalytic region of tyrosine kinase adaptor protein 2	-1.27	-1.05	-1	1.04	-1.02	1.14	-1.27	AW437314
321	Tgif2	TGFB-induced factor 2	1.16	-1.14	1.41	-1.15	-1.4	1.12	-1.21	1.41	AW437545	t60?		Tgif2	TGFB-induced factor 2	-1.03	1.13	1.08	-1.21	-1.05	1.16	-1.05	-1.21	AW437545			Tgif2	TGFB-induced factor 2	1.32	-1.17	1.41	1.2	-1.11	1.03	1.41	AW437545
322	BLNK	B-cell linker	-1.35	1.5	-2.37	-1.21	-1.05	1.2	-2.09	-2.37	AW445383			BLNK	B-cell linker	1.39	1.85	-1.04	1.03	-1.27	-1.09	-1.24	1.85	AW445383	t720?		BLNK	B-cell linker	-1.8	-1.04	-1.63	1.12	1.57	1.24	-1.8	AW445383
323	Egfl7	EGF-like domain 7	2.15	-1.07	1.36	-1.33	-1.53	-1.12	1.05	2.15	AW445488	t15?		Egfl7	EGF-like domain 7	-1.14	1.26	1.79	-1.08	1.17	-1.02	1.5	1.79	AW445488			Egfl7	EGF-like domain 7	1.81	-1.09	-1.05	1.08	-1.48	-1.06	1.81	AW445488
324	PPARD	peroxisome proliferator-activated receptor delta	-1.13	1.1	-1.13	-1.48	1.13	1.03	1.04	-1.48	AW445931			PPARD	peroxisome proliferator-activated receptor delta	-1.02	1.24	1.05	-1.36	1.49	1.17	1.09	1.49	AW445931			PPARD	peroxisome proliferator-activated receptor delta	1.05	1.09	1.06	1.22	-1.09	-1.1	1.22	AW445931
325	HLA-DMA	major histocompatibility complex, class II, DM alpha	-1.03	-1.06	1.36	-1.23	-1.93	-1.11	-1.02	-1.93	AW446507			HLA-DMA	major histocompatibility complex, class II, DM alpha	-1.42	1.19	1.22	-1.22	-1.07	-1.03	1.04	-1.42	AW446507			HLA-DMA	major histocompatibility complex, class II, DM alpha	1.51	-1.17	1.22	1.14	-1.46	-1.05	1.51	AW446507	t120? t240? t480?
326	Plekha6		1.16	-1.03	-1.28	-1.05	1.18	-1.19	-1.37	-1.37	AW447324			Plekha6		1.37	1.16	1.19	1.09	-1.04	-1.17	-1	1.37	AW447324			Plekha6		1.08	1.03	-1.38	1.03	1.48	1.05	1.48	AW447324
327	LOC538086		1.07	-1.05	1.1	-1.02	1.05	1.11	-1.18	-1.18	AW461329			LOC538086		1.09	1.07	1.05	1.16	-1.01	1.16	-1.14	1.16	AW461329	t15? t240? t480?		LOC538086		1	-1.05	1.12	-1.06	1.09	-1.02	1.12	AW461329	t60? t120? t480?
328	Adam28	a disintegrin and metallopeptidase domain 28	1.07	-1.06	1.24	1	-1.1	1.06	1.14	1.24	AW461333	t15? t30? t60? t120? t240? t720?		Adam28	a disintegrin and metallopeptidase domain 28	-1.01	1.02	-1.11	1.06	-1.02	1.04	1.11	1.11	AW461333	t15? t30? t60? t120? t240? t480? t720?		Adam28	a disintegrin and metallopeptidase domain 28	1.05	-1.1	1.3	1.01	-1.02	1.06	1.3	AW461333	t60? t120? t240? t480?
329	Rbms2		-1.05	1.06	-1.41	-1.47	1.12	1.07	1.29	-1.47	AW461336	t720?		Rbms2		1.08	1.49	-1.1	-1.41	1.02	-1.04	-1.19	1.49	AW461336	t240? t480? t720?		Rbms2		1.08	-1.37	-1.13	1.17	1.19	1.14	-1.37	AW461336	t30? t120? t480?
330	INTS12		-1.06	1.04	-1.06	-1.07	-1.05	-1.25	1.03	-1.25	AW461342	t15? t30? t60? t120? t240? t480? t720?		INTS12		1.04	1.29	1.04	-1.1	1.05	-1.21	-1.02	1.29	AW461342	t15? t60? t120? t240? t480? t720?		INTS12		1.06	-1.18	-1.07	1.09	-1.01	1.08	-1.18	AW461342	t15? t30? t60? t120? t240? t480?
331	ARPC5L	actin related protein 2/3 complex, subunit 5-like	1.03	1.11	1.14	1.29	1.17	1.1	1.38	1.38	AW461349			ARPC5L	actin related protein 2/3 complex, subunit 5-like	1.14	1.11	1.25	1.69	-1.18	1.22	1.26	1.69	AW461349			ARPC5L	actin related protein 2/3 complex, subunit 5-like	1.11	1.22	1.17	1.03	1.66	-1.13	1.66	AW461349
332	LOC643883		1.37	-1.32	1.67	-1.1	-1.3	-1.05	-1.63	1.67	AW461357			LOC643883		1.04	1.08	1.97	1.24	-1.12	-1.08	-1.06	1.97	AW461357			LOC643883		1.38	-1.15	1.06	-1.03	1.04	1.06	1.38	AW461357
333	VAT1	vesicle amine transport protein 1 homolog (T. californica)	-1.07	-1.05	1.08	-1.17	-1.24	-1.16	-1.3	-1.3	AW461358			VAT1	vesicle amine transport protein 1 homolog (T. californica)	-1.03	1.26	1.12	-1.11	-1.05	-1.13	-1.38	-1.38	AW461358	t120? t720?		VAT1	vesicle amine transport protein 1 homolog (T. californica)	-1.02	-1.23	1.12	1.15	-1.05	1	-1.23	AW461358	t15? t60? t120? t480?
334	Eml2	echinoderm microtubule associated protein like 2	-1.14	-1.1	-1.02	-1.05	1.17	-1.03	-1.03	1.17	AW461361			Eml2	echinoderm microtubule associated protein like 2	1.02	-1.04	1.06	1.26	1.15	1.14	-1.07	1.26	AW461361			Eml2	echinoderm microtubule associated protein like 2	-1.06	1.05	1.09	-1.11	1.05	-1.03	-1.11	AW461361
335	SYS1		1.11	-1.27	1.21	-1.19	-1.08	1.19	1.02	-1.27	AW461363			SYS1		-1.03	-1.07	1.14	1.18	1.3	1.22	1.21	1.3	AW461363			SYS1		1.28	1.04	1.22	-1.11	-1.23	1.05	1.28	AW461363
336	KIAA2013	KIAA2013	1.03	-1.31	1.5	-1.1	1.01	1.13	-1.39	1.5	AW461366			KIAA2013	KIAA2013	-1.03	-1.13	1.17	1.31	1.3	1.18	1.02	1.31	AW461366			KIAA2013	KIAA2013	1.19	1.05	1.58	-1.08	-1.09	1.03	1.58	AW461366
337	DKK4	dickkopf homolog 4 (Xenopus laevis)	1.07	1.22	-1.2	-1.24	1.15	1.15	-1.38	-1.38	AW461367			DKK4	dickkopf homolog 4 (Xenopus laevis)	1.31	1.2	-1.1	-1.05	1.54	1.13	-1.24	1.54	AW461367			DKK4	dickkopf homolog 4 (Xenopus laevis)	1.03	1.25	1.14	1.13	-1.11	1.06	1.25	AW461367
338	MGC148976		-1.25	1	-1.05	1.1	-1.19	-1.02	1.05	-1.25	AW461370	t120? t720?		MGC148976		-1.02	-1.02	1.01	1.18	-1.13	1.07	-1.14	1.18	AW461370	t15? t30? t60? t120? t240? t480? t720?		MGC148976		1.06	1.11	1.01	-1.01	1.05	-1	1.11	AW461370	t30? t60? t120? t240? t480?
339	WBSCR22	Williams Beuren syndrome chromosome region 22	-1.05	1.11	1.1	1.25	1.15	1.13	1.23	1.25	AW461371			WBSCR22	Williams Beuren syndrome chromosome region 22	1.16	-1.04	1.19	1.49	-1.1	1.18	1.45	1.49	AW461371			WBSCR22	Williams Beuren syndrome chromosome region 22	1.12	1.33	1.2	1.11	1.52	-1.06	1.52	AW461371
340	Rpl8	ribosomal protein L8	-1.1	-1.01	-1.14	-1.33	1.12	1.32	-1.11	-1.33	AW461372			Rpl8	ribosomal protein L8	1.33	1.16	1.09	-1.35	1.58	1.17	1.04	1.58	AW461372			Rpl8	ribosomal protein L8	-1.23	1.05	1	1.36	-1.16	1.17	1.36	AW461372
341	Gnl3		-1.01	-1.03	1.23	1.09	-1.2	-1.06	1.16	1.23	AW461373	t720?		Gnl3		-1.01	1.06	1.35	1.08	1.02	1	1.32	1.35	AW461373	t15? t60? t240? t480?		Gnl3		1.07	-1.16	1.02	1.09	-1.08	-1	-1.16	AW461373	t15? t30? t60? t120? t480?
342	EHBP1L1		-1.06	1.06	-1.33	1.09	1	-1.08	1.04	-1.33	AW461375			EHBP1L1		1.08	1.47	1.1	1.1	-1	-1.2	1.44	1.47	AW461375			EHBP1L1		-1.04	-1.12	-1.22	1.32	1.22	1.15	1.32	AW461375
343	LOC540475		1.12	1.21	-1.31	1.1	1.2	1.14	1.12	-1.31	AW461378			LOC540475		1.19	1.03	1.09	1.47	-1.04	1.17	1.02	1.47	AW461378			LOC540475		1.14	1.34	-1.09	-1.05	1.44	-1.06	1.44	AW461378
344	TA-NFKBH		-1.05	1.17	-1.32	-1.35	1.06	1.21	1.23	-1.35	AW461380	t30?		TA-NFKBH		-1.07	1.54	-1.17	-1.32	1.04	1.08	-1.04	1.54	AW461380			TA-NFKBH		1.08	-1.25	1	1.23	1.08	1.16	-1.25	AW461380	t60?
345	WEE1	WEE1 homolog (S. pombe)	-1.05	-1.04	1.22	1.03	1.02	1.18	1.32	1.32	AW461388			WEE1	WEE1 homolog (S. pombe)	1.14	-1.11	1.22	1.37	-1.08	1.12	-1.03	1.37	AW461388	t720?		WEE1	WEE1 homolog (S. pombe)	1.04	1.2	1.18	-1.05	1.28	1.07	1.28	AW461388
346	BLM	Bloom syndrome	-1.16	1.06	1.08	-1.04	-1.05	-1.19	-1.15	-1.19	AW461396	t15? t30? t60? t120? t240? t480? t720?		BLM	Bloom syndrome	-1.01	1.22	1.14	-1.03	1.08	-1.16	-1.01	1.22	AW461396	t15? t30? t60? t120? t240? t480? t720?		BLM	Bloom syndrome	-1.04	-1.06	-1.02	1.11	-1.02	1.04	1.11	AW461396	t15? t60? t120? t240? t480?
347	Klf6		1.12	1.14	-1.26	-1.22	1.13	1.04	-1.33	-1.33	AW461405	t15?		Klf6		1.4	1.22	1.14	-1.12	1.13	-1.04	-1.19	1.4	AW461405			Klf6		-1.06	1.14	-1.18	1.22	1.24	1.13	1.24	AW461405
348	FAM112B		1.03	1.02	1.07	-1.28	1.04	1.07	-1.07	-1.28	AW461406	t15?		FAM112B		1.06	1.04	-1.12	-1.07	1.12	1.08	1.08	1.12	AW461406	t15? t60? t240? t480?		FAM112B		1.02	1.04	1.15	-1.07	-1.02	1.1	1.15	AW461406	t30? t60? t120? t240? t480?
349	C1orf26		-1.2	1.02	1.05	1.03	1	1.27	-1.02	1.27	AW461407			C1orf26		1.04	1.05	-1.02	1.3	1.01	1.22	-1.09	1.3	AW461407	t60? t120? t240? t480?		C1orf26		-1.13	1.06	1.16	-1.16	1.05	1.09	1.16	AW461407	t15? t60? t120? t480?
350	Acly	ATP citrate lyase	-1.52	1.05	-1.18	1.28	1.31	1.06	1.15	-1.52	AW461420			Acly	ATP citrate lyase	-1.19	-1.06	1.12	1.55	1.2	1.01	-1.2	1.55	AW461420	t120?		Acly	ATP citrate lyase	-1.17	1.24	-1.05	-1.02	1.16	-1	1.24	AW461420
351	CSNK1A1	casein kinase 1, alpha 1	-1.06	1.04	1.43	-1.03	-1.32	1.22	1.42	1.43	AW461425			CSNK1A1	casein kinase 1, alpha 1	-1.09	1.27	1.1	-1.38	1.18	1.01	1.18	-1.38	AW461425			CSNK1A1	casein kinase 1, alpha 1	1.1	-1.11	1.51	1.74	-1.43	1.16	1.74	AW461425
352	LOC727741		-1.03	-1.23	2.29	-1.16	-1.44	1.04	1.19	2.29	AW461430	t120?		LOC727741		-1.34	1.31	1.72	-1.54	-1.05	1.12	1.41	1.72	AW461430	t120?		LOC727741		1.48	-1.29	1.68	1.6	-1.16	-1.05	1.68	AW461430
353	Tgm3	transglutaminase 3, E polypeptide	-1.1	1.14	-1.27	-1.34	1.65	3.15	5.09	5.09	AW461432	t15? t240?		Tgm3	transglutaminase 3, E polypeptide	-1.09	1.29	-1.67	-1.08	2.2	2.09	2.11	2.2	AW461432			Tgm3	transglutaminase 3, E polypeptide	1	-1.06	1.41	1.03	-1.29	1.49	1.49	AW461432
354	TKDP4		-1.17	-1.01	1.06	1.05	-1.03	-1.11	1.03	-1.17	AW461434	t720?		TKDP4		-1.08	1.01	-1.02	1.04	-1.03	-1.04	1.12	1.12	AW461434	t15? t30? t60? t120? t240? t480? t720?		TKDP4		1.11	1.16	1.12	-1.01	1.07	1.02	1.16	AW461434	t15? t30? t60? t120? t240? t480?
355	Slc12a9	solute carrier family 12 (potassium/chloride transporters), member 9	-1.14	1.01	1.03	1.15	1.01	-1.06	1.06	1.15	AW461435	t720?		Slc12a9	solute carrier family 12 (potassium/chloride transporters), member 9	1.01	-1.11	1.1	1.18	-1.16	1.01	1.26	1.26	AW461435	t15? t60? t120? t240? t480? t720?		Slc12a9	solute carrier family 12 (potassium/chloride transporters), member 9	1.03	1.2	-1.02	1.05	1.27	1.02	1.27	AW461435	t15? t60? t120? t480?
356	Sertad1	SERTA domain containing 1	1.15	1.06	1.23	1.15	-1.09	1.1	1.49	1.49	AW461437			Sertad1	SERTA domain containing 1	1	1.09	1.26	1.34	1.13	-1	2.11	2.11	AW461437	t720?		Sertad1	SERTA domain containing 1	1.06	1.08	1.1	-1.01	-1.05	1.16	1.16	AW461437
357	MGC127459		1.05	-1.17	-1.18	-1.19	1.21	1.15	-1.17	1.21	AW461439			MGC127459		1.17	1.14	1.03	-1.12	1.4	1.32	1.01	1.4	AW461439			MGC127459		1.05	-1.09	-1.01	1.26	1.04	-1.11	1.26	AW461439
358	AW461441		-1.01	1.06	-1.08	1.02	-1.08	1.05	-1.2	-1.2	AW461441			AW461441	Transcribed locus	1.04	1.03	1.16	1.15	-1.12	1.04	-1.04	1.16	AW461441	t15? t60? t240? t480?		AW461441		1.24	1.17	-1.12	-1	1.15	1.08	1.24	AW461441	t60? t480?
359	COG1	component of oligomeric golgi complex 1	1.06	1.04	-1.11	-1.07	-1.06	-1.02	-1.2	-1.2	AW461443			COG1	component of oligomeric golgi complex 1	1.14	1.07	1.1	-1.06	-1.11	-1.03	-1.1	1.14	AW461443	t15? t60? t240? t480?		COG1	component of oligomeric golgi complex 1	1.06	1.05	-1.18	1.04	1.21	1.06	1.21	AW461443	t60? t120? t480?
360	Bag4	BCL2-associated athanogene 4	1.06	-1.16	1.29	1.1	-1.01	1.12	-1.01	1.29	AW461444	t120? t720?		Bag4	BCL2-associated athanogene 4	-1.04	1.01	1.14	1.37	-1.05	1.14	1.01	1.37	AW461444	t60? t120?		Bag4	BCL2-associated athanogene 4	1.16	-1.05	1.23	-1.09	1.14	-1.02	1.23	AW461444	t120? t480?
361	IMPA2	inositol(myo)-1(or 4)-monophosphatase 2	1.09	-1.51	1.37	-1.11	1.08	-1.51	-1.02	-1.51	AW461449	t15? t30? t60? t120? t240? t480?		IMPA2	inositol(myo)-1(or 4)-monophosphatase 2	-1.2	-1.06	1.39	-1.29	2.07	-1.26	1.04	2.07	AW461449	t15? t60? t120? t240?		IMPA2	inositol(myo)-1(or 4)-monophosphatase 2	1.45	-1.28	1.09	1.25	-1.63	-1.24	-1.63	AW461449	t30? t60? t120? t480?
362	Nup37	nucleoporin 37	1.04	-1.14	1.21	1.14	-1.08	1.03	-1.09	1.21	AW461450	t30? t120?		Nup37	nucleoporin 37	1.07	-1.14	1.16	1.27	-1.02	1.07	1.16	1.27	AW461450			Nup37	nucleoporin 37	1.09	1.12	1.22	1.07	1.13	-1.02	1.22	AW461450	t30?
363	MSX1	msh homeobox 1	-1.05	-1.08	1.12	1.11	1.01	-1.05	1.01	1.12	AW461452			MSX1	msh homeobox 1	-1.07	-1.12	1.2	1.07	-1.05	1.03	1.31	1.31	AW461452	t15? t30? t60? t120? t240? t480?		MSX1	msh homeobox 1	1.33	1.15	-1.01	1.11	1.18	-1.01	1.33	AW461452	t30? t60? t120? t480?
364	POLR3A	polymerase (RNA) III (DNA directed) polypeptide A, 155kDa	1.22	-1.18	-1.3	-1.05	1.03	-1.03	1.38	1.38	AW461453			POLR3A	polymerase (RNA) III (DNA directed) polypeptide A, 155kDa	1.41	1.05	1.02	1.02	1.04	1	1.23	1.41	AW461453			POLR3A	polymerase (RNA) III (DNA directed) polypeptide A, 155kDa	-1.01	-1.04	-1.1	1.1	1.19	1.04	1.19	AW461453
365	C9orf156		1.11	-1.02	1.12	-1.03	-1.14	-1.2	-1.13	-1.2	AW461455	t15? t120? t240? t720?		C9orf156		1.04	1.2	-1.01	-1.01	-1.05	-1.08	1.01	1.2	AW461455	t15? t60? t120? t240? t480?		C9orf156		1.1	-1.14	1.13	1.08	1.01	-1.09	-1.14	AW461455	t60? t120? t240? t480?
366	LOC785873	similar to Tripartite motif-containing protein 26 (Zinc finger protein 173) (Acid finger protein) (AFP) (RING finger protein 95)	1.33	-1.03	-1.2	-1.07	1.01	1.01	-1.19	1.33	AW461456	t15?		LOC785873	similar to Tripartite motif-containing protein 26 (Zinc finger protein 173) (Acid finger protein) (AFP) (RING finger protein 95)	1.5	1.09	1.06	-1.03	1.16	1.03	-1.22	1.5	AW461456	t15? t240?		LOC785873	similar to Tripartite motif-containing protein 26 (Zinc finger protein 173) (Acid finger protein) (AFP) (RING finger protein 95)	1.04	-1.02	-1.07	1.1	-1.07	1.02	1.1	AW461456	t60? t480?
367	SERPING1	serpin peptidase inhibitor, clade G (C1 inhibitor), member 1, (angioedema, hereditary)	-1.12	-1.16	1.08	-1.02	-1.31	1.77	1.29	1.77	AW461469			SERPING1	serpin peptidase inhibitor, clade G (C1 inhibitor), member 1, (angioedema, hereditary)	1.09	1.89	1.1	1.71	1.58	1.93	1.38	1.93	AW461469			SERPING1	serpin peptidase inhibitor, clade G (C1 inhibitor), member 1, (angioedema, hereditary)	-1.11	-1.83	1.15	-1.31	-1.67	1.01	-1.83	AW461469
368	JDP2		-1.22	1.03	-1.05	-1.19	1.24	1.17	-1.05	1.24	AW461471	t15?		JDP2		1.18	1.04	1.07	-1.34	1.15	1.14	-1.07	-1.34	AW461471			JDP2		-1.05	1.13	1.07	1.34	1.15	1.07	1.34	AW461471
369	Afg3l2	AFG3(ATPase family gene 3)-like 2 (yeast)	-1.25	-1.06	-1.2	-1.21	1.25	1.01	1.1	1.25	AW461475			Afg3l2	AFG3(ATPase family gene 3)-like 2 (yeast)	-1.05	-1.09	1.05	-1.07	1.39	1.12	-1.3	1.39	AW461475	t720?		Afg3l2	AFG3(ATPase family gene 3)-like 2 (yeast)	-1.04	1.13	-1.04	1.11	-1.07	-1.07	1.13	AW461475
370	Tars2	threonyl-tRNA synthetase 2, mitochondrial (putative) (EC:6.1.1.3)	1.1	-1.11	1.18	-1.14	1.08	1.07	-1.02	1.18	AW461476			Tars2	threonyl-tRNA synthetase 2, mitochondrial (putative) (EC:6.1.1.3)	-1.04	-1.08	1.01	1.09	1.01	1.15	1.09	1.15	AW461476	t15? t30? t60? t120? t240? t480?		Tars2	threonyl-tRNA synthetase 2, mitochondrial (putative) (EC:6.1.1.3)	1.18	1.03	1.17	-1.06	1.14	-1.02	1.18	AW461476	t30? t60? t120? t480?
371	Rnf111		-1.18	1.2	-1.38	-1.06	1.22	1.02	-1.12	-1.38	AW461479	t15?		Rnf111		1.09	1.16	1.05	1.14	1.11	1.04	-1.35	-1.35	AW461479	t15? t240?		Rnf111		-1.11	1.2	-1.14	1.05	1.16	-1.02	1.2	AW461479
372	FLJ20273		-1.1	1.33	-1.49	-1.12	1.03	-1	1.12	-1.49	AW461481			FLJ20273		1.26	1.46	-1.24	1.07	1.39	-1.06	1.39	1.46	AW461481			FLJ20273		-1.04	1.04	1.16	1.21	-1.09	1.12	1.21	AW461481
373	TMEM30B	transmembrane protein 30B	1.04	-1.08	-1.04	1.02	-1.02	1.01	1.13	1.13	AW461495	t720?		TMEM30B	transmembrane protein 30B	1.09	-1.05	-1.03	1.23	1.02	1.03	1.18	1.23	AW461495	t15? t30? t60? t120? t240? t480?		TMEM30B	transmembrane protein 30B	1.05	1.1	1.05	-1.11	1.04	1.06	-1.11	AW461495	t30? t60? t120? t240? t480?
374	PLA2G7	phospholipase A2, group VII (platelet-activating factor acetylhydrolase, plasma)	1.08	1.19	1.06	1.13	1.03	1.06	-1.27	-1.27	AW461498			PLA2G7	phospholipase A2, group VII (platelet-activating factor acetylhydrolase, plasma)	1.28	-1.04	1.07	1.56	-1.1	1.1	-1.07	1.56	AW461498			PLA2G7	phospholipase A2, group VII (platelet-activating factor acetylhydrolase, plasma)	1.02	1.36	1.21	-1.01	1.27	1.08	1.36	AW461498
375	RAD9A		1.11	-1.34	1.2	1.12	1.01	1.08	-1.29	-1.34	AW461499			RAD9A		1.06	-1.09	1.19	1.57	1.19	1.14	1.23	1.57	AW461499			RAD9A		1.13	-1.03	1.14	-1.13	1.02	1.01	1.14	AW461499
376	AKR7A2		-1.08	-1.15	-1.07	-1.04	-1.21	-1.12	-1.46	-1.46	AW461500	t15?		AKR7A2		1.02	1.16	1.36	1.09	1.2	-1.05	1.75	1.75	AW461500			AKR7A2		1.08	-1.09	-1.17	1.19	-1.19	-1.03	1.19	AW461500
377	TNFAIP6	tumor necrosis factor, alpha-induced protein 6	-1.15	1.01	1.15	1.16	1.15	1.43	2.51	2.51	AW461501			TNFAIP6	tumor necrosis factor, alpha-induced protein 6	1.08	-1.12	1.19	1.37	1.08	1.25	-1.12	1.37	AW461501	t15? t30? t60? t120? t720?		TNFAIP6	tumor necrosis factor, alpha-induced protein 6	1.06	1.19	1.16	1.03	1.17	1.24	1.24	AW461501	t30? t60?
378	Trappc4	trafficking protein particle complex 4	-1.1	-1.28	2.57	1.43	-1.82	-1.15	-1.02	2.57	AW461503			Trappc4	trafficking protein particle complex 4	-1.64	-1.13	1.84	1.26	-1.57	1.05	1.22	1.84	AW461503			Trappc4	trafficking protein particle complex 4	1.36	1.06	1.64	1.39	1.03	-1.16	1.64	AW461503
379	TPM4	tropomyosin 4	-1.06	-1.08	-1.01	1.05	1.44	2	2.33	2.33	AW461504			TPM4	tropomyosin 4	1.44	1.06	1.27	1.32	1.82	1.36	1.6	1.82	AW461504			TPM4	tropomyosin 4	-1.2	1.06	-1.02	1.06	-1.07	1.43	1.43	AW461504
380	Twistnb	TWIST neighbor	1.14	1.3	-1.13	-1.01	1.43	1.21	-1.12	1.43	AW461508			Twistnb	TWIST neighbor	1.44	1.15	1.14	1.2	1.47	1.12	-1.17	1.47	AW461508	t15?		Twistnb	TWIST neighbor	-1.11	1.27	1.01	1.07	1.13	1.13	1.27	AW461508
381	MGC137708		1.06	-1	-1.07	1.01	1.12	1.1	1.13	1.13	AW461513	t15?		MGC137708		1.04	-1.04	1.11	1.17	1.12	1.06	1	1.17	AW461513	t15? t60?		MGC137708		1.13	1.13	-1.02	1	1.12	1.08	1.13	AW461513	t60?
382	Peg3	paternally expressed 3	1.32	-1.06	1.78	1.03	-1.09	-1.12	-1.21	1.78	AW461515			Peg3	paternally expressed 3	1.13	-1.23	1.16	1.11	-1.05	1.16	1.22	-1.23	AW461515			Peg3	paternally expressed 3	1.31	1.32	1.57	1.15	1.14	-1.15	1.57	AW461515
383	GPBAR1		1.01	-1.09	1.05	-1.13	-1.26	-1.03	1.12	-1.26	AW461516	t15? t30? t240?		GPBAR1		-1.33	1.04	-1.26	1.18	1.19	-1.05	1.07	-1.33	AW461516	t15? t30? t480?		GPBAR1		1.37	-1.14	1.22	-1.24	-1.37	1.07	1.37	AW461516	t30? t60? t120? t240? t480?
384	Bt.6250		1.02	1.25	-1.34	1.08	1.06	1.39	-1.38	1.39	AW461534			Bt.6250		1.2	1.28	1.14	1.57	-1.33	1.3	-1.44	1.57	AW461534			Bt.6250		1.04	1.11	-1.14	-1.05	1.65	1.09	1.65	AW461534
385	Zcchc9	zinc finger, CCHC domain containing 9	1.15	-1.06	-1.07	-1.08	1.04	1.02	-1.15	1.15	AW461536			Zcchc9	zinc finger, CCHC domain containing 9	1.11	-1.03	1.15	1.22	1.04	1.02	-1.01	1.22	AW461536			Zcchc9	zinc finger, CCHC domain containing 9	1.27	1.21	-1.09	-1.01	1.09	1.02	1.27	AW461536	t60?
386	MRPL33	mitochondrial ribosomal protein L33	-1.03	1.08	-1.02	-1.53	1.14	1.17	1.05	-1.53	AW461538	t15? t30? t240?		MRPL33	mitochondrial ribosomal protein L33	1.11	1.24	1.02	-1.63	1.21	1.09	1.09	-1.63	AW461538	t240? t480? t720?		MRPL33	mitochondrial ribosomal protein L33	1.05	-1.09	1.18	1.32	1	1.06	1.32	AW461538	t480?
387	Mafb	v-maf musculoaponeurotic fibrosarcoma oncogene family, protein B (avian)	-1.18	1.21	-1.4	1.08	-1.03	1.26	-1.36	-1.4	AW461546			Mafb	v-maf musculoaponeurotic fibrosarcoma oncogene family, protein B (avian)	-1.09	1.05	-1.11	1.72	-1.22	1.23	-1.07	1.72	AW461546			Mafb	v-maf musculoaponeurotic fibrosarcoma oncogene family, protein B (avian)	1.04	1.31	-1.01	-1.2	1.38	1.05	1.38	AW461546
388	Ank3	ankyrin 3, epithelial	1.34	-1.1	-1.11	-1.48	-1.15	-1.44	-1.88	-1.88	AW461549	t720?		Ank3	ankyrin 3, epithelial	1.1	-1.18	1.04	-1.07	-1.31	-1.15	-1.24	-1.31	AW461549	t60? t120? t480?		Ank3	ankyrin 3, epithelial	1.18	1.22	1.02	-1.12	1.27	-1.16	1.27	AW461549	t480?
389	PLOD2	procollagen-lysine, 2-oxoglutarate 5-dioxygenase 2	-1.04	1.18	-1.31	-1.15	1.16	-1.19	-1.2	-1.31	AW461559	t15? t240? t480? t720?		PLOD2	procollagen-lysine, 2-oxoglutarate 5-dioxygenase 2	1.19	1.19	-1.08	-1.06	1.14	-1.13	1.06	1.19	AW461559	t15? t240? t480?		PLOD2	procollagen-lysine, 2-oxoglutarate 5-dioxygenase 2	-1.07	1.06	-1.14	1.07	1.12	-1.05	-1.14	AW461559	t15? t60? t480?
390	Commd2		-1.09	-1.04	-1.15	-1.07	-1.09	-1.11	-1.18	-1.18	AW461561	t15? t240?		Commd2		1.06	1.23	1.07	-1.13	1.02	-1.07	-1.27	-1.27	AW461561			Commd2		-1.19	-1.12	1	1.27	-1.03	-1.01	1.27	AW461561	t60?
391	NET1	neuroepithelial cell transforming gene 1	-1.08	1.09	-1.19	-1.1	-1.01	1.02	-1.11	-1.19	AW461566			NET1	neuroepithelial cell transforming gene 1	1.06	1.36	1.03	-1.01	1.03	-1.04	-1.26	1.36	AW461566			NET1	neuroepithelial cell transforming gene 1	-1.18	-1.11	1.02	1.18	1.02	1.09	1.18	AW461566	t60?
392	CCNL1	cyclin L1	1.09	1.07	1.43	-1.08	1.11	2.55	1.8	2.55	AW461567			CCNL1	cyclin L1	-1.06	1.46	1.18	1.25	1.21	1.67	1.29	1.67	AW461567			CCNL1	cyclin L1	1.24	-1.18	1.42	-1.04	1.05	1.43	1.43	AW461567
393	C6orf129		-1.04	-1.07	1.33	1.2	-1.2	1.01	1.11	1.33	AW461570	t15? t30? t60? t120? t240? t720?		C6orf129		-1.2	-1.26	1.42	-1.02	1.03	1.09	-1.02	1.42	AW461570	t15? t60? t120? t480? t720?		C6orf129		1.21	1.15	1.11	1.36	1.01	1.02	1.36	AW461570	t60? t120? t480?
394	CEBPB	CCAAT/enhancer binding protein (C/EBP), beta	1.06	1.08	-1.24	1.27	1.49	2.43	2.35	2.43	AW461572			CEBPB	CCAAT/enhancer binding protein (C/EBP), beta	1.29	1.1	1.32	1.44	1.62	1.58	1.59	1.62	AW461572			CEBPB	CCAAT/enhancer binding protein (C/EBP), beta	1.04	1.17	-1.27	1.13	1.14	1.47	1.47	AW461572
395	LOC513577		1.03	1.01	1.2	-1.08	-1.05	-1.02	-1.06	1.2	AW461574	t240?		LOC513577		1.01	1.11	-1	-1.14	1.07	1.04	1.12	-1.14	AW461574	t15? t60? t120? t240? t480?		LOC513577		1.13	-1.01	1.25	1.12	-1.07	-1.02	1.25	AW461574	t30? t60? t120? t240? t480?
396	PDZK1	PDZ domain containing 1	1.05	1.57	-1.47	-1.22	-1.09	-1.67	-2.24	-2.24	AW461578			PDZK1	PDZ domain containing 1	1.04	1.7	-1.19	1.01	-1.04	-1.4	-2.11	-2.11	AW461578	t480?		PDZK1	PDZ domain containing 1	1.47	-1.02	-1.11	1	1.03	-1	1.47	AW461578	t30? t480?
397	KIAA0323		1.03	1.19	-1.18	-1.13	1.14	1.09	-1.24	-1.24	AW461579			KIAA0323		-1	1.08	1.03	-1.05	1.09	1.06	-1.06	1.09	AW461579	t15? t60? t240? t480?		KIAA0323		1.22	1.12	-1.1	-1	1.08	1.07	1.22	AW461579	t60? t120? t480?
398	LOC509011		-1.02	-1.03	-1.61	-1.51	1.54	1.15	-1.12	-1.61	AW461580			LOC509011		1.26	1.83	1.01	-1.57	1.34	1.26	1.02	1.83	AW461580			LOC509011		1.07	-1.57	-1.27	1.39	1.32	-1.03	-1.57	AW461580
399	Tmed10	transmembrane emp24-like trafficking protein 10 (yeast)	1.04	-1.02	1.08	1.21	1.07	1.05	-1.22	-1.22	AW461583			Tmed10	transmembrane emp24-like trafficking protein 10 (yeast)	1.24	1.04	1.34	1.42	-1.05	1.07	1.12	1.42	AW461583			Tmed10	transmembrane emp24-like trafficking protein 10 (yeast)	1.02	1.15	1	1.14	1.35	1.02	1.35	AW461583
400	Ehmt2	euchromatic histone lysine N-methyltransferase 2	1.39	-1.01	1.28	1.12	1.14	-1.2	-1.19	1.39	AW461585			Ehmt2	euchromatic histone lysine N-methyltransferase 2	1.27	1.09	1.2	1.49	1.05	1.04	1.43	1.49	AW461585			Ehmt2	euchromatic histone lysine N-methyltransferase 2	1.35	1.08	1.33	1.06	1.3	-1.15	1.35	AW461585
401	NUTF2	nuclear transport factor 2	-1.06	1.06	-1.46	1.24	1.05	-1.07	-1.45	-1.46	AW461589			NUTF2	nuclear transport factor 2	1.13	1.13	1.29	1.75	-1.35	1.05	-1.1	1.75	AW461589			NUTF2	nuclear transport factor 2	1.12	1.16	-1.47	-1.05	1.72	-1.05	1.72	AW461589
402	LOC647979	hypothetical protein LOC647979	-1.01	-1.23	1.3	-1.13	-1.08	1.04	1.14	1.3	AW461593	t15? t30? t60? t240?		LOC647979	hypothetical protein LOC647979	-1.04	-1.05	1.08	-1.54	1.52	-1.04	-1.03	-1.54	AW461593	t120?		LOC647979	hypothetical protein LOC647979	1.45	-1.06	1.34	1.8	-1.43	1.08	1.8	AW461593	t60?
403	FLJ13611		1.05	-1.02	1.04	-1.13	1.22	1.2	-1.02	1.22	AW461596			FLJ13611		-1.03	-1.01	-1.03	1.07	1.18	1.2	1.07	1.2	AW461596	t60? t480?		FLJ13611		1.07	1.08	1.23	1.03	1.05	1.02	1.23	AW461596	t60?
404	Usp21	ubiquitin specific peptidase 21	-1.1	1.06	-1.35	1.09	1.15	1.24	-1.46	-1.46	AW461599			Usp21	ubiquitin specific peptidase 21	1.15	1.03	1.15	1.18	1.19	1.17	-1.25	-1.25	AW461599			Usp21	ubiquitin specific peptidase 21	-1.07	1.21	-1.16	1.19	1.22	1.11	1.22	AW461599
405	ALKBH3		-1.03	-1.16	1.23	-1.1	-1.41	-1.02	-1.02	-1.41	AW461605	t15? t30? t120? t240?		ALKBH3		-1.2	-1.09	-1.06	-1.15	1.03	1.06	-1.01	-1.2	AW461605			ALKBH3		1.34	-1.01	1.31	1.08	-1.27	-1.06	1.34	AW461605	t60? t120? t240? t480?
406	CCBL1	cysteine conjugate-beta lyase, cytoplasmic	1.19	-1.01	1.15	-1.09	-1.02	1.14	1.17	1.19	AW461608			CCBL1	cysteine conjugate-beta lyase, cytoplasmic	-1.08	1.05	-1.01	-1.26	1.11	1.16	1.3	1.3	AW461608			CCBL1	cysteine conjugate-beta lyase, cytoplasmic	1.31	1.16	1.3	1.4	-1.02	1.02	1.4	AW461608
407	AW461616		1.27	-1.23	1.25	1.06	1.08	-1.01	1.12	1.27	AW461616			AW461616		1.11	-1.13	-1.03	1.33	-1.02	1.1	1.23	1.33	AW461616	t720?		AW461616		1.11	-1.06	1.29	-1.09	1.28	1.02	1.29	AW461616	t120? t480?
408	Aqp11	aquaporin 11	1.12	-1.24	1.25	-1.38	1.25	1.25	1.08	-1.38	AW461617			Aqp11	aquaporin 11	1.09	-1.05	1.03	-1.12	1.35	1.3	1.27	1.35	AW461617			Aqp11	aquaporin 11	1.15	-1.02	1.44	1.03	1	1.05	1.44	AW461617
409	HSD11B1	hydroxysteroid (11-beta) dehydrogenase 1	-1.03	-1.13	-1.12	1.07	1.05	1.12	-1.25	-1.25	AW461620	t15? t30?		HSD11B1	hydroxysteroid (11-beta) dehydrogenase 1	1.41	1.28	1.16	1.05	1.13	-1.01	-1.11	1.41	AW461620	t15?		HSD11B1	hydroxysteroid (11-beta) dehydrogenase 1	-1.41	-1.26	-1.1	1.22	1.06	1.14	-1.41	AW461620
410	B3Gat3	beta-1,3-glucuronyltransferase 3 (glucuronosyltransferase I)	1	-1.06	1.02	1.07	1.03	-1.07	-1.26	-1.26	AW461625			B3Gat3	beta-1,3-glucuronyltransferase 3 (glucuronosyltransferase I)	1.02	-1.17	1.22	1.09	1.04	1.05	1.21	1.22	AW461625			B3Gat3	beta-1,3-glucuronyltransferase 3 (glucuronosyltransferase I)	1.46	1.28	1.05	1.22	1.26	-1.09	1.46	AW461625
411	EMX2	empty spiracles homeobox 2	1.27	-1.27	1.6	-1.03	1.04	-1.13	1.11	1.6	AW461632	t30? t60?		EMX2	empty spiracles homeobox 2	-1.02	-1.1	1.13	1.09	1.19	1.07	1.45	1.45	AW461632			EMX2	empty spiracles homeobox 2	1.19	1.02	1.49	1.06	1	-1.08	1.49	AW461632
412	QDPR	quinoid dihydropteridine reductase	-1.17	-1.03	-1.23	-1.22	-1.07	-1.01	-1.13	-1.23	AW461635			QDPR	quinoid dihydropteridine reductase	1.02	-1.09	-1.04	-1.05	1.15	-1.05	-1.16	-1.16	AW461635	t60?		QDPR	quinoid dihydropteridine reductase	-1.04	1.12	1	1.04	-1.19	1.1	-1.19	AW461635
413	Hipk1	homeodomain interacting protein kinase 1	-1.21	-1.02	-1.58	-1.27	-1.13	-1.19	-1.18	-1.58	AW461637	t15? t30?		Hipk1	homeodomain interacting protein kinase 1	-1	1.83	-1.06	-1.66	-1.62	-1.24	-1.31	1.83	AW461637			Hipk1	homeodomain interacting protein kinase 1	1.04	-1.5	-1.17	1.74	1.72	1.06	1.74	AW461637
414	PAG7		1.06	1.2	-2.65	1.24	2.1	1.4	-1.13	-2.65	AW461649	t15? t30? t60? t120? t240? t480? t720?		PAG7		1.09	1.76	-2.77	1.05	2.03	-1.3	-1.12	-2.77	AW461649	t15? t30? t60? t120? t240? t480? t720?		PAG7		-1.04	-1.38	1.27	1.3	1.24	2.75	2.75	AW461649	t15? t30? t60? t120? t240? t480?
415	EXOC2	exocyst complex component 2	-1.13	-1.26	1.11	-1.42	-1.19	1.07	1.02	-1.42	AW461651	t15? t30?		EXOC2	exocyst complex component 2	-1.3	1.33	-1.13	-1.34	-1.05	1.21	1.13	-1.34	AW461651			EXOC2	exocyst complex component 2	1.19	-1.43	1.45	1.17	-1.03	-1.03	1.45	AW461651
416	Plod3	procollagen-lysine, 2-oxoglutarate 5-dioxygenase 3	1.18	-1.2	1.04	-1.45	1.45	-1.1	-1.59	-1.59	AW461657			Plod3	procollagen-lysine, 2-oxoglutarate 5-dioxygenase 3	1.48	-1.11	1.18	1.04	1.33	1.11	-1.16	1.48	AW461657			Plod3	procollagen-lysine, 2-oxoglutarate 5-dioxygenase 3	1.01	1.08	1.17	-1.07	1.24	-1.2	1.24	AW461657
417	FLJ10769		-1.13	1.03	1.09	1.06	1.01	-1.01	1.23	1.23	AW461658	t720?		FLJ10769		1.03	1.11	1.1	1.07	-1.07	1.03	1.18	1.18	AW461658	t15? t60? t120? t240? t480? t720?		FLJ10769		-1.01	-1.01	1.03	1.02	1.14	1.01	1.14	AW461658	t15? t30? t60? t120? t240? t480?
418	LOC731094	similar to titin isoform N2-B	-1.16	-1.27	1.24	-1.19	-1.31	1.04	-1.05	-1.31	AW461661			LOC731094	similar to titin isoform N2-B	-1.96	1	-1.18	-1.05	1.16	1.22	1.03	-1.96	AW461661	t15?		LOC731094	similar to titin isoform N2-B	1.76	-1.21	1.45	-1.03	-1.37	-1.08	1.76	AW461661	t60? t480?
419	ZNF527		1.14	1.05	1.03	1.2	-1.41	-1.18	-1.36	-1.41	AW461666			ZNF527		-1.07	1.28	-1	1.16	-1.11	-1.13	1.04	1.28	AW461666	t120?		ZNF527		1.23	1.01	1.17	1.11	-1.05	-1.06	1.23	AW461666
420	FASTK	Fas-activated serine/threonine kinase	1.06	1.11	-1.18	-1.16	1.14	-1.22	-1.09	-1.22	AW461672	t15? t30? t60? t120? t240?		FASTK	Fas-activated serine/threonine kinase	1.05	1.38	1.05	-1.27	1	-1.4	-1.27	-1.4	AW461672			FASTK	Fas-activated serine/threonine kinase	1.18	-1.17	-1.13	1.21	1.3	1.16	1.3	AW461672	t120? t480?
421	Kctd11		-1.18	1.01	-1.49	-1.1	1.25	-1.07	-1.6	-1.6	AW461676			Kctd11		1.09	1.07	1.16	1.2	1.3	-1.04	-1.06	1.3	AW461676			Kctd11		-1	1.15	-1.29	1.02	1.15	1.05	-1.29	AW461676
422	MGC140785		1.12	1.04	1.13	-1.08	-1.11	-1	-1.07	1.13	AW461679	t720?		MGC140785		1.11	-1.08	1.18	1.16	-1.07	1.01	1.13	1.18	AW461679	t30? t60? t120? t240? t480?		MGC140785		1.06	1.17	1.03	-1.17	1.07	1.03	1.17	AW461679	t30? t60? t120? t480?
423	Slc4a11	solute carrier family 4, sodium bicarbonate transporter-like, member 11	1.02	-1.18	1.45	1.04	-1.22	-1.13	1.15	1.45	AW461682	t720?		Slc4a11	solute carrier family 4, sodium bicarbonate transporter-like, member 11	-1.2	-1.13	1.22	1.02	-1.07	-1.13	1.45	1.45	AW461682	t15? t60? t120? t240?		Slc4a11	solute carrier family 4, sodium bicarbonate transporter-like, member 11	1.22	1.02	1.24	1.06	1.04	1.04	1.24	AW461682	t30? t60? t120? t240? t480?
424	TSG101	tumor susceptibility gene 101	-1.32	-1.05	-1.15	-1.18	1.29	1.16	1.25	-1.32	AW461686			TSG101	tumor susceptibility gene 101	-1.1	-1.06	-1.03	-1.04	1.38	1.08	-1.04	1.38	AW461686	t240?		TSG101	tumor susceptibility gene 101	-1.08	1.09	1.08	1.12	-1.04	1.06	1.12	AW461686
425	CDC34	cell division cycle 34 homolog (S. cerevisiae)	1.04	1.04	1.25	-1.05	1.33	-1.04	-1.02	1.33	AW461687			CDC34	cell division cycle 34 homolog (S. cerevisiae)	1.01	-1.05	1.08	-1	1.1	-1	1.12	1.12	AW461687	t480?		CDC34	cell division cycle 34 homolog (S. cerevisiae)	1.13	1.26	1.37	1.16	1.15	1.04	1.37	AW461687
426	Med31		1.08	-1.02	-1.11	-1.08	1.03	1.1	1.03	-1.11	AW461690	t60?		Med31		1.47	1.05	-1.03	1.11	1.19	1.09	1.02	1.47	AW461690	t15?		Med31		-1.08	1.03	1.05	1.03	-1.06	1.06	-1.08	AW461690
427	LOC513598		1.04	-1.01	-1.52	-1.08	-1.01	-1.18	1.08	-1.52	AW461693			LOC513598		1.13	1.39	1.03	-1.06	-1.13	-1.22	2.14	2.14	AW461693			LOC513598		1.04	-1.13	-1.18	1.28	1.36	1.06	1.36	AW461693
428	IRF6	interferon regulatory factor 6	-1.01	1.04	1.03	-1	-1.02	1.2	1.08	1.2	AW461694	t240? t480? t720?		IRF6	interferon regulatory factor 6	-1.01	1.12	-1.24	-1.01	1.13	1.06	1.1	-1.24	AW461694	t15? t30? t60? t120? t240? t480?		IRF6	interferon regulatory factor 6	1.12	-1.02	1.27	1.02	-1.13	1.19	1.27	AW461694	t15? t60? t120? t240? t480?
429	Abcc10	ATP-binding cassette, sub-family C (CFTR/MRP), member 10	-1.06	1.25	-1.25	-1.41	1.09	1.02	1.08	-1.41	AW461699			Abcc10	ATP-binding cassette, sub-family C (CFTR/MRP), member 10	-1.01	1.84	1.04	-1.66	-1.03	-1.01	1.06	1.84	AW461699			Abcc10	ATP-binding cassette, sub-family C (CFTR/MRP), member 10	1.01	-1.33	-1.16	1.4	1.23	1.11	1.4	AW461699	t60?
430	Zc3hav1	zinc finger CCCH type, antiviral 1	1.06	1.26	-1.31	1.06	1.16	1.26	1.22	-1.31	AW461704			Zc3hav1	zinc finger CCCH type, antiviral 1	1.22	1.13	1.07	1.44	1.03	1.2	1.24	1.44	AW461704			Zc3hav1	zinc finger CCCH type, antiviral 1	1.06	1.29	-1.08	-1.03	1.32	1.02	1.32	AW461704
431	CCDC109B		-1.04	-1.01	1.06	1.08	-1.09	-1.16	1.02	-1.16	AW461709			CCDC109B		1.03	-1.04	1.16	-1.02	-1.09	-1.01	1.2	1.2	AW461709	t15? t30? t60? t120? t240? t480?		CCDC109B		1.05	1.13	-1.01	1.15	1.1	-1.07	1.15	AW461709	t30? t60? t120? t240? t480?
432	AW461710		1.2	-1.06	1.01	1.25	-1.06	-1.08	-1.15	1.25	AW461710			AW461710	Transcribed locus	1.25	-1.05	1.15	1.47	1.02	1.11	1.55	1.55	AW461710			AW461710		1.3	1.25	1.09	1.12	1.14	-1.08	1.3	AW461710
433	LOC647307		1.21	-1.19	1.55	1.1	-1.42	-1.15	-1.1	1.55	AW461715	t15?		LOC647307		-1.11	1.09	1.09	1.26	-1.04	-1.31	-1.17	-1.31	AW461715			LOC647307		1.33	-1.15	1.63	1.01	-1.12	1.03	1.63	AW461715
434	CKMT1B	creatine kinase, mitochondrial 1B (EC:2.7.3.2)	1.02	1.25	-1.62	-1.41	1.31	-1.12	-1.05	-1.62	AW461717			CKMT1B	creatine kinase, mitochondrial 1B (EC:2.7.3.2)	1.04	2.01	-1.02	-1.56	1.36	-1.04	1.12	2.01	AW461717			CKMT1B	creatine kinase, mitochondrial 1B (EC:2.7.3.2)	1.01	-1.33	-1.19	1.47	1.11	-1.05	1.47	AW461717
435	Bt.65229		-1.04	-1.19	-1.28	-1.08	1.37	-1.03	-1.3	1.37	AW461721			Bt.65229		1.24	-1	-1.02	1.08	1.17	-1.04	-1.02	1.24	AW461721			Bt.65229		1.02	-1.07	-1.06	1.06	1.3	1.08	1.3	AW461721
436	MGC128667		1.13	-1.03	1.1	1.14	1.06	1.01	-1.14	1.14	AW461726			MGC128667		1.08	1.01	1.24	1.43	-1.01	1.1	1.18	1.43	AW461726	t120? t480?		MGC128667		1.14	1.1	1.05	-1.1	1.17	-1.08	1.17	AW461726	t120? t480?
437	Hook1		1.01	1.09	-1.08	-1.36	1.13	1.01	-1.04	-1.36	AW461727			Hook1		1.11	1.11	-1.04	-1.19	1.05	1.03	1.01	-1.19	AW461727	t15? t60? t240? t480?		Hook1		-1.03	-1	1.02	1.03	1.09	1.07	1.09	AW461727	t60? t120? t240? t480?
438	TMEM50B		1.07	1.15	1.01	1.13	1.18	1.35	1.43	1.43	AW461731			TMEM50B		1.03	1.07	1.24	1.25	1.04	1.3	1.66	1.66	AW461731			TMEM50B		1.05	1.17	-1.04	1.13	1.27	-1.01	1.27	AW461731	t60?
439	Ier5	immediate early response 5	-1.03	1.04	1.04	1.08	1.3	1	1	1.3	AW461737			Ier5	immediate early response 5	1.01	-1.08	1.24	1.39	1.12	1.08	1.19	1.39	AW461737			Ier5	immediate early response 5	1.1	1.26	-1	-1.07	1.27	1.01	1.27	AW461737
440	Arrdc2	arrestin domain containing 2	-1.09	-1.18	1.21	1.02	-1.26	-1.04	1.2	-1.26	AW461741			Arrdc2	arrestin domain containing 2	-1.46	1.03	1.09	1.18	1.13	-1.04	1.79	1.79	AW461741	t15?		Arrdc2	arrestin domain containing 2	1.27	-1.15	1.23	-1.01	-1.28	-1	-1.28	AW461741
441	MIA	melanoma inhibitory activity	-1.01	-1.06	-1.36	1.12	1.18	-1	-1.24	-1.36	AW461743	t720?		MIA	melanoma inhibitory activity	1.23	1.23	-1.08	1.09	1.06	-1.03	-1.15	1.23	AW461743	t15? t120? t240? t480? t720?		MIA	melanoma inhibitory activity	-1.06	-1.21	-1.09	1.05	1.12	1.13	-1.21	AW461743	t30? t60? t120? t240? t480?
442	POMC	proopiomelanocortin (adrenocorticotropin/ beta-lipotropin/ alpha-melanocyte stimulating hormone/ bet	1.01	1.03	1.1	-1.02	1.02	1.03	-1.01	1.1	AW461746	t720?		POMC	proopiomelanocortin (adrenocorticotropin/ beta-lipotropin/ alpha-melanocyte stimulating hormone/ bet	1.04	1.06	1.02	1.02	1.04	1.08	1.1	1.1	AW461746	t15? t30? t60? t120? t240? t480?		POMC	proopiomelanocortin (adrenocorticotropin/ beta-lipotropin/ alpha-melanocyte stimulating hormone/ bet	1.09	1.08	1.1	1.01	1.03	1.01	1.1	AW461746	t30? t60? t120? t240? t480?
443	SNX22		1.12	1.04	1.31	-1.3	-1.3	-1.12	-1.18	1.31	AW461747			SNX22		-1	1.36	1.04	-1.43	-1.66	-1.01	-1.21	-1.66	AW461747			SNX22		1.26	-1.09	1.57	1.4	1.53	-1.05	1.57	AW461747
444	LOC784918		-1.17	1.01	-1.04	-1.08	1.24	-1.02	-1.32	-1.32	AW461748			LOC784918		-1.07	-1.08	1.29	1.15	1.05	1.12	1.18	1.29	AW461748			LOC784918		1.38	1.23	-1.1	-1.01	1.35	-1.05	1.38	AW461748	t15?
445	VPS52	vacuolar protein sorting 52 homolog (S. cerevisiae)	1.38	1.1	-1.05	1.02	1.26	1.02	-1.15	1.38	AW461751			VPS52	vacuolar protein sorting 52 homolog (S. cerevisiae)	1.09	1.1	1.11	1.43	1.21	1.1	1.42	1.43	AW461751			VPS52	vacuolar protein sorting 52 homolog (S. cerevisiae)	1.27	1.2	1.08	-1.07	1.21	-1.04	1.27	AW461751
446	CFL1	cofilin 1 (non-muscle)	1.12	-1.23	1.38	1.04	-1.18	-1.06	1.14	1.38	AW461752			CFL1	cofilin 1 (non-muscle)	-1.46	-1.07	1.2	-1.31	1.3	1.19	1.15	-1.46	AW461752			CFL1	cofilin 1 (non-muscle)	1.76	1.08	1.44	1.73	-1.27	-1.21	1.76	AW461752
447	LOC505940		1.13	1.16	-1.01	1.04	1.34	1.09	-1.36	-1.36	AW461754			LOC505940		1.42	1.09	1.22	1.25	1.23	1.04	-1.02	1.42	AW461754			LOC505940		-1.12	1.31	1	1.11	1.31	1.08	1.31	AW461754
448	ENTPD8	calcium activated nucleotidase 1	-1.26	-1.29	-1.24	-1.28	-1.32	-1.07	1.09	-1.32	AW461756	t15?		ENTPD8	calcium activated nucleotidase 1	-1.74	1.01	-1.39	-1.21	1.83	-1.01	1.33	1.83	AW461756			ENTPD8	calcium activated nucleotidase 1	1.71	-1.08	1.18	1.08	-2.13	-1.01	-2.13	AW461756	t120?
449	LLGL2	lethal giant larvae homolog 2 (Drosophila)	-1.03	1.06	-1.76	-1.17	1.01	-1.37	-1.3	-1.76	AW461766	t15?		LLGL2	lethal giant larvae homolog 2 (Drosophila)	1.29	1.62	-1.22	-1.09	-1.24	-1.3	-1.11	1.62	AW461766			LLGL2	lethal giant larvae homolog 2 (Drosophila)	-1.1	-1.24	-1.19	1.24	1.5	-1.02	1.5	AW461766
450	Cbr1	carbonyl reductase 1	-1.07	1.26	-1.23	-1	-1.5	-1.3	-1.43	-1.5	AW461769			Cbr1	carbonyl reductase 1	-1.28	1.6	-1.14	-1.06	1.24	-1.23	1.13	1.6	AW461769	t15? t240?		Cbr1	carbonyl reductase 1	1.5	-1.23	-1.06	1.15	-1.61	1.01	-1.61	AW461769	t60? t120? t240? t480?
451	EDC4	enhancer of mRNA-decapping protein 4	1.16	1.04	-1.27	1.11	1.21	-1.08	-1.23	-1.27	AW461773			EDC4	enhancer of mRNA-decapping protein 4	1.24	1.14	1.18	-1.02	1.15	-1.07	1.09	1.24	AW461773			EDC4	enhancer of mRNA-decapping protein 4	1.23	1.13	-1.2	1.35	1.29	1.03	1.35	AW461773
452	Arhgap24	Rho GTPase activating protein 24	-1.01	-1.09	1.06	-1	1.05	1.08	1.08	-1.09	AW461779			Arhgap24	Rho GTPase activating protein 24	-1.02	1.06	-1.02	1.13	1.07	1.17	1.11	1.17	AW461779	t15? t30? t60? t120? t240? t480? t720?		Arhgap24	Rho GTPase activating protein 24	1.14	-1.05	1.15	-1.06	1.01	-1.03	1.15	AW461779	t30? t60? t120? t240? t480?
453	LOC653214		-1.07	1	1.18	1.33	1.12	1.09	1.12	1.33	AW461780			LOC653214		-1.12	-1	1.44	1.55	-1.42	1.13	1.33	1.55	AW461780			LOC653214		1.31	1.23	1.03	1.15	1.93	1	1.93	AW461780
454	MAN2A2	mannosidase, alpha, class 2A, member 2	1.21	-1.13	1.34	1.18	-1.17	-1.12	1.14	1.34	AW461781			MAN2A2	mannosidase, alpha, class 2A, member 2	1.07	1.09	1.16	1.31	1.12	-1.01	1.54	1.54	AW461781	t720?		MAN2A2	mannosidase, alpha, class 2A, member 2	1.24	-1.04	1.18	1.01	-1.12	-1.03	1.24	AW461781
455	Mcee	methylmalonyl CoA epimerase	-1.07	1	1	-1.16	1.02	1	-1.04	-1.16	AW461795	t720?		Mcee	methylmalonyl CoA epimerase	1.02	1.01	-1.02	-1.03	1.02	-1	1.05	1.05	AW461795	t15? t60? t120? t240? t480? t720?		Mcee	methylmalonyl CoA epimerase	-1	1.06	1.03	-1.03	1.03	1.09	1.09	AW461795	t60? t120? t240? t480?
456	STK25	serine/threonine kinase 25 (STE20 homolog, yeast)	-1.16	-1.1	-1.48	-1.27	-1.03	-1.24	-1.29	-1.48	AW461799	t15? t30?		STK25	serine/threonine kinase 25 (STE20 homolog, yeast)	-1.01	1.44	-1.07	-1.62	-1.16	-1.42	-1.56	-1.62	AW461799			STK25	serine/threonine kinase 25 (STE20 homolog, yeast)	1.05	-1.33	-1.1	1.48	1.41	1.13	1.48	AW461799
457	Nupr1	nuclear protein 1	1.17	-1.29	1.05	1.03	-1.42	1.54	1.32	1.54	AW461802	t15?		Nupr1	nuclear protein 1	-1.2	-1.09	-1.05	1.08	1.15	1.33	1.41	1.41	AW461802			Nupr1	nuclear protein 1	1.47	-1.08	1.23	1.05	-1.46	1.16	1.47	AW461802
458	Ncoa6	nuclear receptor coactivator 6	-1.28	1.04	-1.03	-1.37	1.02	1.12	-1.15	-1.37	AW461803			Ncoa6	nuclear receptor coactivator 6	-1.07	1.1	1.02	-1.09	1.22	1.07	1	1.22	AW461803	t480?		Ncoa6	nuclear receptor coactivator 6	-1.05	1.04	1.12	-1.01	-1.14	1.07	-1.14	AW461803	t60?
459	FZD5	frizzled homolog 5 (Drosophila)	1.02	1.47	-1.21	1.08	-1.22	1.17	-1.45	1.47	AW461804	t120? t720?		FZD5	frizzled homolog 5 (Drosophila)	1.1	1.73	1.09	1.17	-1.21	1.15	1.36	1.73	AW461804	t15? t30? t240? t480?		FZD5	frizzled homolog 5 (Drosophila)	-1.02	-1.08	-1.25	1.05	1.15	1.1	-1.25	AW461804	t60? t120? t480?
460	TP53RK		-1.17	1.04	-1.2	-1.18	1.37	1.19	1.05	1.37	AW461808	t240?		TP53RK		-1.04	-1.04	-1.02	1.1	1.39	1.15	1.06	1.39	AW461808	t60? t240? t480?		TP53RK		1.06	1.15	-1.02	-1.1	1.01	1.09	1.15	AW461808	t60? t120? t480?
461	AW461811		-1.07	1.02	-1.01	-1.03	-1.06	-1.09	-1.04	-1.09	AW461811	t240? t480? t720?		AW461811		1.08	1.12	-1.02	1.11	1.05	-1.03	-1.18	-1.18	AW461811	t15? t60? t120? t240? t480? t720?		AW461811		-1.03	-1.04	-1.01	-1.07	-1.04	1.04	-1.07	AW461811	t15? t30? t60? t120? t240? t480?
462	RPL31	ribosomal protein L31	1.12	-1.12	1.11	1.22	1.07	-1.05	1.24	1.24	AW461813			RPL31	ribosomal protein L31	1.14	-1.1	1.04	1.26	-1.12	1.04	1.29	1.29	AW461813	t720?		RPL31	ribosomal protein L31	1.01	-1.04	1.2	1.06	1.33	-1.04	1.33	AW461813
463	CCL14	chemokine (C-C motif) ligand 14	1.03	1.04	-1.17	-1.09	1.05	-1.1	-1.01	-1.17	AW461818	t720?		CCL14	chemokine (C-C motif) ligand 14	1.04	1.23	-1.16	-1.05	1.05	-1.08	1.05	1.23	AW461818	t240? t480?		CCL14	chemokine (C-C motif) ligand 14	1.04	-1.07	1.05	1.08	1.07	1.02	1.08	AW461818	t60? t120? t240? t480?
464	LOC511420		1.05	1.16	-1.15	1.38	-1.01	-1.04	-1.04	1.38	AW461825			LOC511420		1.13	1.01	1.08	1.67	-1.1	1.03	1.38	1.67	AW461825			LOC511420		1.11	1.42	-1.06	1.04	1.24	1	1.42	AW461825
465	Ddx47	DEAD (Asp-Glu-Ala-Asp) box polypeptide 47	-1.06	1.11	1.05	-1.15	1.39	1.43	1.48	1.48	AW461827			Ddx47	DEAD (Asp-Glu-Ala-Asp) box polypeptide 47	1.42	1.16	1.06	-1.37	1.31	1.25	1.48	1.48	AW461827			Ddx47	DEAD (Asp-Glu-Ala-Asp) box polypeptide 47	-1.27	1.14	1.24	1.5	1.16	1.28	1.5	AW461827
466	ANKH		-1.15	-1.27	-1.2	1.18	-1.15	-1.32	-1.29	-1.32	AW461828	t15? t30? t60? t120? t240?		ANKH		-1.11	-1.35	-1.17	1.08	1.19	-1.43	-1.09	-1.43	AW461828	t15? t60? t120? t720?		ANKH		1.07	1.05	1.12	1.27	-1.18	1.07	1.27	AW461828	t15? t480?
467	WNT6	wingless-type MMTV integration site family, member 6	1.09	-1.27	1.1	-1.03	-1.01	1.05	-1.11	-1.27	AW461838	t15?		WNT6	wingless-type MMTV integration site family, member 6	1.08	-1.18	1.03	1.06	-1.06	1.05	1.11	-1.18	AW461838			WNT6	wingless-type MMTV integration site family, member 6	1.05	1.05	1.13	1.06	1.18	1.04	1.18	AW461838
468	USP14	ubiquitin specific peptidase 14 (tRNA-guanine transglycosylase)	1.08	1.05	1.64	1.12	1.1	1.25	1.24	1.64	AW461839			USP14	ubiquitin specific peptidase 14 (tRNA-guanine transglycosylase)	1.03	-1.01	1.38	1.3	1.08	1.19	1.32	1.38	AW461839	t60?		USP14	ubiquitin specific peptidase 14 (tRNA-guanine transglycosylase)	1.27	1.17	1.33	1.06	1.16	1.02	1.33	AW461839
469	Tnks1bp1	tankyrase 1 binding protein 1	1.02	1.44	-1.66	-1.13	-1.22	-1.2	1.5	-1.66	AW461846			Tnks1bp1	tankyrase 1 binding protein 1	1.06	1.58	-1.01	-1.1	-1.09	-1.25	1.06	1.58	AW461846	t240? t720?		Tnks1bp1	tankyrase 1 binding protein 1	1.05	-1.06	-1.4	1.11	1.03	1.06	-1.4	AW461846	t120? t480?
470	TSR2		-1.12	1.08	-1.46	-1	1.25	-1.05	-1.25	-1.46	AW461848			TSR2		1.15	1.1	-1.02	1.16	1.2	-1.1	1.21	1.21	AW461848			TSR2		-1.08	1.23	-1.09	1.16	1.3	1.11	1.3	AW461848
471	SLC27A2	solute carrier family 27 (fatty acid transporter), member 2	1.09	1.33	-1.16	1.09	-1.31	-1.13	-1.55	-1.55	AW461852	t720?		SLC27A2	solute carrier family 27 (fatty acid transporter), member 2	1.17	1.28	1.19	1.18	-1.25	-1.08	-1.37	-1.37	AW461852	t15? t60? t120? t240? t480? t720?		SLC27A2	solute carrier family 27 (fatty acid transporter), member 2	1.07	1.11	-1.32	-1.06	1.04	1.07	-1.32	AW461852	t60? t120? t240? t480?
472	ITGB5	integrin, beta 5	1.17	-1.33	1.56	1.15	-1.12	-1.01	1.14	1.56	AW461856	t15? t60? t240?		ITGB5	integrin, beta 5	1.09	-1.18	1.24	1.22	-1.01	-1.05	1.48	1.48	AW461856	t60? t120? t240? t480?		ITGB5	integrin, beta 5	1.16	1.03	1.33	1.05	1.06	1.06	1.33	AW461856	t60? t120? t240?
473	IGF2R	insulin-like growth factor 2 receptor	-1.25	-1	-1.07	-1.02	1.02	-1.12	-1.32	-1.32	AW461858			IGF2R	insulin-like growth factor 2 receptor	-1.08	-1.02	1.11	1.03	1.12	-1.08	-1.25	-1.25	AW461858	t15? t30? t60? t120? t240? t480? t720?		IGF2R	insulin-like growth factor 2 receptor	1.08	1.14	-1.06	1.05	-1.08	1.01	1.14	AW461858	t15? t30? t60? t120? t480?
474	Bt.35853		-1.12	-1.01	-1.16	1.16	-1.1	1.14	2.01	2.01	AW461864			Bt.35853		-1.08	-1.07	1.11	1.2	1.02	1.05	1.42	1.42	AW461864	t60?		Bt.35853		1.24	1.2	-1.08	1.1	1.06	1.09	1.24	AW461864
475	TMEM86A	transmembrane protein 86A	-1.29	1.1	-1.05	1.28	-1.18	-1.21	1.4	1.4	AW461867	t15?		TMEM86A	transmembrane protein 86A	-1.52	1.16	1.45	1.6	1.01	-1.27	2.48	2.48	AW461867			TMEM86A	transmembrane protein 86A	1	1.17	-1.25	1.04	1.02	1.09	-1.25	AW461867	t15?
476	Slc30a5	solute carrier family 30 (zinc transporter), member 5	-1.05	1.13	1.22	-1.07	1.02	1.15	-1.04	1.22	AW461871			Slc30a5	solute carrier family 30 (zinc transporter), member 5	-1.09	1.25	1.01	-1.17	1.15	1.16	1.09	1.25	AW461871			Slc30a5	solute carrier family 30 (zinc transporter), member 5	1.11	1.02	1.26	1.23	-1.05	-1.03	1.26	AW461871	t60? t480?
477	Msr1	macrophage scavenger receptor 1	-1.04	1.24	-1.36	-1.15	-1.04	-1.09	1.16	-1.36	AW461872	t720?		Msr1	macrophage scavenger receptor 1	1.07	1.3	-1.09	-1.03	1.09	-1.14	1.01	1.3	AW461872	t15? t30? t240? t480? t720?		Msr1	macrophage scavenger receptor 1	1.04	-1.06	-1.24	-1.04	1.06	1.09	-1.24	AW461872	t15? t60? t120? t240? t480?
478	LIFR	leukemia inhibitory factor receptor alpha	1.07	1.13	-1.07	1.17	-1.04	1.04	1.17	1.17	AW461878			LIFR	leukemia inhibitory factor receptor alpha	1.06	-1.01	1.13	1.2	-1.04	1.12	1.31	1.31	AW461878	t60? t480?		LIFR	leukemia inhibitory factor receptor alpha	1.02	1.21	-1.06	1.11	1.13	-1.01	1.21	AW461878	t60? t120?
479	SPTBN2	spectrin, beta, non-erythrocytic 2	1.16	-1.21	1.28	1.68	-1.28	-1.02	1.16	1.68	AW461879			SPTBN2	spectrin, beta, non-erythrocytic 2	1.32	1.12	1.51	1.35	-1.07	-1.03	1.69	1.69	AW461879			SPTBN2	spectrin, beta, non-erythrocytic 2	-1.02	-1.1	-1.02	1.52	1	1.05	1.52	AW461879
480	Dazap2	DAZ associated protein 2	-1.27	1.02	-1.47	1.13	1.3	1.03	-1.38	-1.47	AW461881			Dazap2	DAZ associated protein 2	1.3	1.04	1.05	1.21	1.42	1.01	-1.38	1.42	AW461881			Dazap2	DAZ associated protein 2	-1.3	1.15	-1.14	1.23	1.05	-1	-1.3	AW461881
481	ATF7IP	activating transcription factor 7 interacting protein	1.17	-1.03	1.09	1.04	1.01	1.14	-1.07	1.17	AW461882			ATF7IP	activating transcription factor 7 interacting protein	1.13	-1.29	1.15	1.43	-1.02	1.2	1.12	1.43	AW461882			ATF7IP	activating transcription factor 7 interacting protein	1.31	1.32	1.2	-1.05	1.23	-1.02	1.32	AW461882
482	Ankrd43		1.05	-1.03	-1.51	-1.19	-1.2	-1.25	-1.58	-1.58	AW461884			Ankrd43		1.52	1.22	-1.14	-1.08	-1	-1.23	-1.74	-1.74	AW461884	t15? t60? t480? t720?		Ankrd43		-1.29	-1.12	-1.12	1.09	-1.14	1.1	-1.29	AW461884	t60? t240? t480?
483	LOC507082		1.11	-1.37	-1.1	1.06	1.04	-1.14	-1.07	-1.37	AW461885			LOC507082		-1	-1.43	-1.01	1.03	1.15	-1.17	1.31	-1.43	AW461885			LOC507082		1.28	1.12	1.04	1.2	1.07	1.02	1.28	AW461885
484	Hand2	heart and neural crest derivatives expressed transcript 2	-1.22	1.17	-1.03	1.12	-1.62	-1.03	1.14	-1.62	AW461893	t720?		Hand2	heart and neural crest derivatives expressed transcript 2	-1.12	1.09	1.19	1.12	-1.3	1.11	1.32	1.32	AW461893	t15? t60? t120? t240? t480? t720?		Hand2	heart and neural crest derivatives expressed transcript 2	-1.05	1.11	-1.2	1.06	1.07	-1.05	-1.2	AW461893	t60? t120? t240? t480?
485	TAOK3		1.1	1.14	-1.47	1.3	1.33	1.42	1.14	-1.47	AW461896			TAOK3		1.23	1.26	-1.01	1.38	1.27	1.17	1.16	1.38	AW461896	t120?		TAOK3		-1.16	1.05	-1.09	1.04	1.11	1.19	1.19	AW461896
486	Ppm1j		-1.04	-1.04	-1.02	1.24	-1.11	1	1.09	1.24	AW461898			Ppm1j		-1	-1.07	1.03	1.1	-1.08	1.06	1.38	1.38	AW461898	t60? t120? t240? t480?		Ppm1j		1.15	1.1	-1.06	1.16	1.09	1.02	1.16	AW461898	t30? t60? t120? t480?
487	Thyn1	thymocyte nuclear protein 1	-1	1.14	1.12	-1.35	-1.12	1.08	1.05	-1.35	AW461900	t240?		Thyn1	thymocyte nuclear protein 1	-1.16	1.01	-1.02	-1.32	1.22	-1.09	-1.08	-1.32	AW461900	t15? t120? t240? t480? t720?		Thyn1	thymocyte nuclear protein 1	1.36	1.15	1.29	1.11	-1.24	1.22	1.36	AW461900	t60? t120? t240?
488	DF	complement factor D (adipsin)	-1.11	1.04	-1.52	-1.12	-1.23	1.15	-1.18	-1.52	AW461905			DF	complement factor D (adipsin)	-1.11	1.6	-1.19	1.09	-1.42	-1.09	1.32	1.6	AW461905	t240? t720?		DF	complement factor D (adipsin)	1.06	-1.45	-1.15	-1.04	1.37	1.28	-1.45	AW461905	t30? t240?
489	ect2	ect2 oncogene	1.14	1.36	-1.03	1.17	-1.13	1.06	-1.05	1.36	AW461921			ect2	ect2 oncogene	1.34	1.17	1.26	1.21	-1.24	1.21	1.1	1.34	AW461921			ect2	ect2 oncogene	-1.05	1.21	-1.02	1.22	1.27	-1.11	1.27	AW461921
490	ELF3	E74-like factor 3 (ets domain transcription factor, epithelial-specific )	1.2	-1.07	-1.01	1.4	1.14	1.24	1.72	1.72	AW461923			ELF3	E74-like factor 3 (ets domain transcription factor, epithelial-specific )	1.21	1.33	1.21	2.29	1.8	1.25	2.61	2.61	AW461923	t720?		ELF3	E74-like factor 3 (ets domain transcription factor, epithelial-specific )	1.11	-1.18	-1.01	-1.22	-1.29	1.09	-1.29	AW461923
491	IQGAP3	IQ motif containing GTPase activating protein 3	1.13	1.02	1.03	1.14	1.08	-1.17	-1.16	-1.17	AW461931	t15? t60?		IQGAP3	IQ motif containing GTPase activating protein 3	1.19	-1.14	1.24	-1.04	1	-1.04	1.31	1.31	AW461931			IQGAP3	IQ motif containing GTPase activating protein 3	1.24	1.26	-1	1.37	1.33	-1.09	1.37	AW461931
492	Phlda1	pleckstrin homology-like domain, family A, member 1	-1.09	1.01	1.88	2.12	2.25	3.24	4.9	4.9	AW461932			Phlda1	pleckstrin homology-like domain, family A, member 1	1.21	1.09	1.49	1.71	2.07	2.21	3.69	3.69	AW461932	t60? t120? t720?		Phlda1	pleckstrin homology-like domain, family A, member 1	-1.14	1.07	1.4	1.32	1.26	1.33	1.4	AW461932	t15? t60?
493	TMEM165		-1.06	-1.06	1.06	-1.02	1.1	-1.05	1.24	1.24	AW461934			TMEM165		1.05	1.03	1.13	1.06	1.16	1.02	1.04	1.16	AW461934	t60? t120? t240? t480? t720?		TMEM165		-1.09	1.04	1.05	1.04	1.03	-1.07	-1.09	AW461934	t15? t30? t60? t120? t480?
494	LOC504733		1.02	-1	-1.1	1.03	1.35	-1.03	-1.63	-1.63	AW461937			LOC504733		1.45	1.11	1.31	1.19	1.12	-1.05	-1	1.45	AW461937			LOC504733		-1.18	1.11	-1.17	1.17	1.47	1.06	1.47	AW461937
495	Espn	espin	-1.03	1.26	-1.55	-1.17	-1.12	-1.25	-1.73	-1.73	AW461939			Espn	espin	-1.14	1.59	-1.04	-1.02	1.2	-1.28	-1.4	1.59	AW461939	t480?		Espn	espin	1.28	-1.26	-1.37	-1.03	-1.17	1.09	-1.37	AW461939	t15? t30? t60? t120? t240? t480?
496	REEP1		1.06	-1.36	1.15	1.13	-1.21	-1.11	1.04	-1.36	AW461945	t240?		REEP1		1.05	-1.33	1.04	1.02	-1.04	-1.01	1.34	1.34	AW461945	t30? t60? t120? t480?		REEP1		1.09	1.06	1.16	1.2	1.04	-1.02	1.2	AW461945	t30? t60? t120? t240? t480?
497	C11orf79	chromosome 11 open reading frame 79	-1.02	1.28	-1.51	-1.08	-1.02	-1.37	1	-1.51	AW461946			C11orf79	chromosome 11 open reading frame 79	1.08	1.26	1.07	-1.2	-1.09	-1.43	1.13	-1.43	AW461946	t30? t240?		C11orf79	chromosome 11 open reading frame 79	1.13	1.14	-1.34	1.31	1.32	1.01	-1.34	AW461946	t15? t480?
498	Sf3b3	splicing factor 3b, subunit 3	1.01	-1.12	1.34	-1.11	1.26	1.36	1.09	1.36	AW461949			Sf3b3	splicing factor 3b, subunit 3	-1.09	1.05	1.16	1.15	1.22	1.34	1.29	1.34	AW461949			Sf3b3	splicing factor 3b, subunit 3	1.28	1.04	1.47	1.1	1.19	1.01	1.47	AW461949
499	Ndufv1	NADH dehydrogenase (ubiquinone) flavoprotein 1	-1.33	1.34	-2.06	-1.1	1.08	-1.19	-1.8	-2.06	AW461976	t15?		Ndufv1	NADH dehydrogenase (ubiquinone) flavoprotein 1	1.33	1.47	1.08	-1.08	-1.1	-1.36	-1.1	1.47	AW461976			Ndufv1	NADH dehydrogenase (ubiquinone) flavoprotein 1	-1.51	1.08	-1.64	1.22	1.5	1.14	-1.64	AW461976
500	SFRS17A	splicing factor, arginine/serine-rich 17A	1.04	1.09	-1.13	-1.2	1.04	-1.12	-1.15	-1.2	AW461981	t15? t240?		SFRS17A	splicing factor, arginine/serine-rich 17A	-1	1.36	-1.06	-1.16	-1.13	-1.16	-1.32	1.36	AW461981			SFRS17A	splicing factor, arginine/serine-rich 17A	1.09	-1.14	1.04	1.11	1.31	1.09	1.31	AW461981	t60?
501	PAK6	p21(CDKN1A)-activated kinase 6	1.23	-1.37	1.36	1.15	-1	1.08	-1.03	-1.37	AW461984			PAK6	p21(CDKN1A)-activated kinase 6	1.23	1.03	1.34	1.26	-1.03	1.16	1.38	1.38	AW461984			PAK6	p21(CDKN1A)-activated kinase 6	1.12	-1.14	1.18	1.14	1.19	-1.08	1.19	AW461984
502	Dnaja4	DnaJ (Hsp40) homolog, subfamily A, member 4	-1.43	1.07	-1.27	-1.23	-1.39	-1.23	-1.06	-1.43	AW461989	t15?		Dnaja4	DnaJ (Hsp40) homolog, subfamily A, member 4	1.19	1.56	-1.01	-1.35	-2.12	-1.35	-1.48	-2.12	AW461989			Dnaja4	DnaJ (Hsp40) homolog, subfamily A, member 4	-1.44	-1.19	-1.02	1.47	1.85	1.14	1.85	AW461989
503	CSRP1	cysteine and glycine-rich protein 1	1.07	-1.05	-1.05	-1.06	1.03	-1.09	-1.01	-1.09	AW461998			CSRP1	cysteine and glycine-rich protein 1	1.09	1	1.04	1.09	-1.06	1.03	1.07	1.09	AW461998	t15? t60? t120? t240? t480?		CSRP1	cysteine and glycine-rich protein 1	1.07	1.05	-1.01	-1.06	1.17	-1.08	1.17	AW461998	t60? t120? t480?
504	Cd164	CD164 antigen	-1.34	1.21	-1.31	1.05	1.28	1.62	1.07	1.62	AW462000			Cd164	CD164 antigen	-1.02	1.27	1.03	1.17	1.58	1.03	1.14	1.58	AW462000			Cd164	CD164 antigen	-1.07	1.13	1.01	1.25	1.02	1.43	1.43	AW462000
505	LOC788225		-1.36	-1	-1.65	-1.02	1.17	1.07	-1.37	-1.65	AW462011			LOC788225		-1.01	1.2	1.24	1.18	1.34	-1.05	-1.22	1.34	AW462011			LOC788225		-1.18	1.02	-1.53	1.12	1.06	1.03	-1.53	AW462011
506	PREP	prolyl endopeptidase	-1.13	1.04	1.13	1.17	1.03	1.01	1.09	1.17	AW462014			PREP	prolyl endopeptidase	-1.01	-1.02	1.29	1.21	-1.07	1.01	1.32	1.32	AW462014			PREP	prolyl endopeptidase	1.15	1.16	1.05	1.15	1.28	1.01	1.28	AW462014
507	ZNF410		1.13	-1.01	-1.07	1.18	-1.04	-1.02	-1.02	1.18	AW462016	t120?		ZNF410		1.05	-1.07	1.01	1.12	1.15	-1.01	1.19	1.19	AW462016			ZNF410		1.11	1.08	1.04	1.21	-1.05	-1.02	1.21	AW462016	t60?
508	S100a6	S100 calcium binding protein A6 (calcyclin)	1.1	1	-1.04	-1.23	-1.14	-1.07	1.23	1.23	AW462018	t720?		S100a6	S100 calcium binding protein A6 (calcyclin)	1.02	1.27	-1.04	1.09	-1.06	-1.07	1.09	1.27	AW462018	t480?		S100a6	S100 calcium binding protein A6 (calcyclin)	1.07	-1.13	1.03	-1.21	1.05	1.01	-1.21	AW462018	t60? t120? t480?
509	Wdr8	WD repeat domain 8	-1.13	-1.17	1.4	-1.24	1.08	1.06	1.11	1.4	AW462019			Wdr8	WD repeat domain 8	-1	-1.12	-1.04	1.06	1.09	1.2	1.02	1.2	AW462019			Wdr8	WD repeat domain 8	-1.05	-1.03	1.46	-1.05	1.02	-1	1.46	AW462019
510	MGC134398	no description	1.04	1.09	-1.05	1.14	-1.09	-1.17	-1	-1.17	AW462026	t120? t720?		MGC134398	no description	-1.06	1.05	-1.17	1.21	1.03	-1.12	1.16	1.21	AW462026	t15? t240? t480?		MGC134398	no description	1.08	1.08	1.08	-1.03	1.03	1	1.08	AW462026	t15? t60? t120? t240? t480?
511	Slc39a11	solute carrier family 39 (metal ion transporter), member 11	1.15	1.12	-1.19	-1.09	-1.07	-1.2	-1.22	-1.22	AW462027	t15?		Slc39a11	solute carrier family 39 (metal ion transporter), member 11	1.16	-1.07	1.12	1.05	1.13	-1.07	-1.04	1.16	AW462027			Slc39a11	solute carrier family 39 (metal ion transporter), member 11	1.14	1.31	-1.11	1.02	-1	-1.02	1.31	AW462027
512	VPS8		-1.03	1.04	1.1	-1.24	-1.02	-1.08	1.05	-1.24	AW462031	t720?		VPS8		-1.06	1.07	-1.07	-1.09	1.03	-1.03	-1.02	-1.09	AW462031	t15? t30? t60? t120? t240? t480? t720?		VPS8		1.15	-1.03	1.15	-1.1	1.11	1.01	1.15	AW462031	t15? t30? t60? t120? t240? t480?
513	LOC508291		1.12	1	-1.34	-1.26	1.29	1.06	-1.37	-1.37	AW462032			LOC508291		1.12	1.11	-1.2	1.13	1.52	1.11	-1.41	1.52	AW462032			LOC508291		1.02	1.08	1.09	-1.06	1.01	1.05	1.09	AW462032
514	ACP2	acid phosphatase 2, lysosomal	1.2	1.01	-1.87	-1.15	1.32	-1.12	-1.43	-1.87	AW462034			ACP2	acid phosphatase 2, lysosomal	1.07	1.47	-1.06	-1.15	1.38	-1.06	-1.16	1.47	AW462034			ACP2	acid phosphatase 2, lysosomal	1.22	-1.22	-1.36	1.24	1.04	-1.01	-1.36	AW462034
515	Pdk4	pyruvate dehydrogenase kinase, isoenzyme 4	-1.2	1	1.11	-1.09	-1.01	-1.3	1.01	-1.3	AW462035	t120? t240? t480? t720?		Pdk4	pyruvate dehydrogenase kinase, isoenzyme 4	-1.08	-1.05	1.1	-1.06	1.29	-1.17	1.06	1.29	AW462035	t15? t30? t60? t120? t240? t480?		Pdk4	pyruvate dehydrogenase kinase, isoenzyme 4	1.04	1.14	1.04	1.03	-1.14	-1.01	1.14	AW462035	t15? t30? t60? t120? t240? t480?
516	Ndrg3	N-myc downstream regulated gene 3	-1	-1.12	1.09	1.32	1	-1.25	-1.24	1.32	AW462037			Ndrg3	N-myc downstream regulated gene 3	1.01	-1.05	1.21	1.14	1.1	-1.18	1.17	1.21	AW462037			Ndrg3	N-myc downstream regulated gene 3	1.2	1.04	1.05	1.36	1.06	-1.07	1.36	AW462037
517	C16orf24		1.12	1.09	-1.08	1.14	-1.01	-1.12	-1.12	1.14	AW462041			C16orf24		1.19	1.06	1.13	1.4	-1.03	1.06	1.51	1.51	AW462041			C16orf24		1.1	1.21	1.02	1.09	1.23	-1.09	1.23	AW462041
518	Osbpl9		-1.34	1.2	-1.56	1.09	1.01	1.14	-1.35	-1.56	AW462046			Osbpl9		1.1	1.36	-1.03	1.12	1.22	-1.13	-1.74	-1.74	AW462046			Osbpl9		-1.44	1.03	-1.15	1.31	-1.09	1.18	-1.44	AW462046
519	MMP23B		1.05	1.08	1.08	-1.19	-1.14	-1.1	1	-1.19	AW462054	t720?		MMP23B		-1.06	1.3	-1.15	-1.19	-1.05	1.01	-1.14	1.3	AW462054	t240? t480? t720?		MMP23B		1.18	-1.12	1.25	1.12	1.05	-1.06	1.25	AW462054	t60? t120? t240? t480?
520	LOC511941		-1.01	1.05	1.13	-1.14	-1.11	1.08	1.13	-1.14	AW462066	t15? t30? t240? t720?		LOC511941		-1.22	1.01	-1.14	-1.08	1.11	1.22	1.11	1.22	AW462066	t15? t120? t240? t480?		LOC511941		1.28	1.18	1.28	1.03	-1.18	-1.1	1.28	AW462066	t60? t120? t240? t480?
521	KIAA1026		-1.03	1.06	-1.15	-1.02	-1.07	-1.27	-1.1	-1.27	AW462068			KIAA1026		-1.19	1.18	-1.12	-1.1	1.06	-1.15	1.58	1.58	AW462068			KIAA1026		1.3	-1.05	1.01	1.16	1.05	-1.06	1.3	AW462068	t120? t480?
522	Bet1	blocked early in transport 1 homolog (S. cerevisiae)	1.23	1.05	1.21	1.11	-1.03	1.03	-1.1	1.23	AW462070	t720?		Bet1	blocked early in transport 1 homolog (S. cerevisiae)	1.04	1.15	1.14	1.27	-1.06	1.08	1.04	1.27	AW462070	t60? t120? t480? t720?		Bet1	blocked early in transport 1 homolog (S. cerevisiae)	1.24	1.01	1.14	-1.01	1.12	-1.02	1.24	AW462070	t60? t120? t480?
523	Rnf130	ring finger protein 130	1.09	-1.03	-1	1.03	-1.11	-1.05	1.15	1.15	AW462072	t240?		Rnf130	ring finger protein 130	1.1	-1.08	1.07	1.03	1.08	-1.12	1.31	1.31	AW462072	t60? t720?		Rnf130	ring finger protein 130	1.05	1.09	1.01	1.16	-1.06	1.07	1.16	AW462072	t60? t480?
524	PSMC1	proteasome (prosome, macropain) 26S subunit, ATPase, 1	-1	1.3	-1.64	-1.08	1.04	-1.09	-1.27	-1.64	AW462073	t15?		PSMC1	proteasome (prosome, macropain) 26S subunit, ATPase, 1	1.3	1.33	1.12	-1.14	1.04	-1.33	-1.11	1.33	AW462073			PSMC1	proteasome (prosome, macropain) 26S subunit, ATPase, 1	-1.23	1.15	-1.33	1.34	1.28	1.1	1.34	AW462073
525	KIFC1	kinesin family member C1	1.05	-1.17	1.05	1.23	-1.16	1.02	1.44	1.44	AW462082	t120?		KIFC1	kinesin family member C1	1.03	1.22	1.04	1.58	1.23	1.01	2.12	2.12	AW462082	t120?		KIFC1	kinesin family member C1	1.13	-1.16	1.12	-1.05	-1.17	1.06	-1.17	AW462082
526	EPB41L5		1.06	-1.03	-1.04	-1.13	1.4	1.03	-1.4	1.4	AW462087			EPB41L5		1.24	-1.21	1.11	1.24	1.09	1.12	-1.09	1.24	AW462087			EPB41L5		1.12	1.43	1.14	-1.06	1.48	-1.01	1.48	AW462087
527	Ddx54	DEAD (Asp-Glu-Ala-Asp) box polypeptide 54	-1.04	1.23	-1.84	-1.06	-1.04	-1.34	1.23	-1.84	AW462090			Ddx54	DEAD (Asp-Glu-Ala-Asp) box polypeptide 54	1.08	1.58	-1.12	-1.14	1.01	-1.45	1.3	1.58	AW462090			Ddx54	DEAD (Asp-Glu-Ala-Asp) box polypeptide 54	-1.01	-1.08	-1.27	1.28	1.18	1.16	1.28	AW462090
528	PTGS2	prostaglandin-endoperoxide synthase 2 (prostaglandin G/H synthase and cyclooxygenase)	-1.18	1.16	1.35	2.1	2.98	4.19	12.42	12.42	AW462092	t60? t720?		PTGS2	prostaglandin-endoperoxide synthase 2 (prostaglandin G/H synthase and cyclooxygenase)	1.13	1.36	1.23	1.66	1.46	2.13	1.79	2.13	AW462092	t15? t30? t60? t120? t240?		PTGS2	prostaglandin-endoperoxide synthase 2 (prostaglandin G/H synthase and cyclooxygenase)	-1.03	-1.03	1.34	1.4	2.11	1.86	2.11	AW462092	t15? t30? t60? t120?
529	FUT3	fucosyltransferase 3 (galactoside 3(4)-L-fucosyltransferase, Lewis blood group)	1.3	-1.22	1.05	-1.2	-1.53	-1.08	-1.3	-1.53	AW462094	t720?		FUT3	fucosyltransferase 3 (galactoside 3(4)-L-fucosyltransferase, Lewis blood group)	-1.05	1.2	-1.41	1.16	1.28	1.05	1.13	-1.41	AW462094	t15?		FUT3	fucosyltransferase 3 (galactoside 3(4)-L-fucosyltransferase, Lewis blood group)	1.17	-1.37	1.43	-1.1	-1.74	-1.04	-1.74	AW462094
530	SCARB2	scavenger receptor class B, member 2	-1.19	1.07	-1.09	1.06	-1.19	-1.48	-2.18	-2.18	AW462095			SCARB2	scavenger receptor class B, member 2	-1.12	1.07	1.03	1.25	1.12	-1.26	-1.33	-1.33	AW462095			SCARB2	scavenger receptor class B, member 2	1.09	1.13	1.08	1.09	-1.16	-1.19	-1.19	AW462095
531	M-RIP		1.4	-1.06	1.38	1.09	-1.08	-1.22	1.01	1.4	AW462100			M-RIP		1.04	-1.16	1.16	-1.09	1.2	-1.28	1.24	-1.28	AW462100	t60? t120?		M-RIP		1.34	1.15	1.45	1.33	-1.09	-1	1.45	AW462100	t30? t480?
532	NIBP	NIK and IKK{beta} binding protein	1.14	1.01	1	-1.16	1.23	-1.04	-1.49	-1.49	AW462101			NIBP	NIK and IKK{beta} binding protein	1.4	-1.01	1.08	1.26	1.06	1.12	-1.14	1.4	AW462101			NIBP	NIK and IKK{beta} binding protein	1.01	1.21	1.07	-1.05	1.46	-1.03	1.46	AW462101
533	AW462102		-1.13	1.05	-1.09	1	1.01	1.06	-1.04	-1.13	AW462102	t240? t480? t720?		AW462102		1.12	1.18	1.06	1.05	1.1	1.05	1.06	1.18	AW462102	t15? t30? t60? t120? t240? t480?		AW462102		-1.19	1.03	-1.09	1.01	-1.02	1.07	-1.19	AW462102	t15? t30? t60? t120? t240? t480?
534	Pfkfb2	6-phosphofructo-2-kinase/fructose-2,6-biphosphatase 2	1.04	1.25	-1.11	-1.02	1.28	1.12	-1.18	1.28	AW462106	t15? t60?		Pfkfb2	6-phosphofructo-2-kinase/fructose-2,6-biphosphatase 2	1.37	1.14	1.07	1.03	1.45	-1.03	1.01	1.45	AW462106	t15?		Pfkfb2	6-phosphofructo-2-kinase/fructose-2,6-biphosphatase 2	-1.35	1.18	-1.02	1.12	-1.16	1.13	-1.35	AW462106	t480?
535	Ptdsr		1.23	-1.08	-1	1.04	1.03	1.06	1.08	1.23	AW462110			Ptdsr		1.09	-1.11	-1.14	1.25	1.05	1.05	1.22	1.25	AW462110			Ptdsr		1.11	1.05	1.12	-1.11	1.09	1.08	1.12	AW462110	t30? t60? t120? t480?
536	Plekha1	pleckstrin homology domain containing, family A (phosphoinositide binding specific) member 1	1.06	1.05	1.23	1.08	1.05	1.01	1.1	1.23	AW462113	t720?		Plekha1	pleckstrin homology domain containing, family A (phosphoinositide binding specific) member 1	1.05	-1.08	1.04	1.15	-1.02	1.08	1.21	1.21	AW462113	t15? t60? t120? t240? t480?		Plekha1	pleckstrin homology domain containing, family A (phosphoinositide binding specific) member 1	1.11	1.13	1.21	1.03	1.15	-1.05	1.21	AW462113	t60? t120? t480?
537	Lad1	ladinin	-1.11	-1.03	-2.19	-1.09	-1.16	-1.24	-1.13	-2.19	AW462126	t15? t30?		Lad1	ladinin	1.16	1.81	1.11	-1.08	-1.41	-1.39	1.34	1.81	AW462126			Lad1	ladinin	-1.06	-1.45	-1.75	1.16	1.6	1.15	-1.75	AW462126
538	LOC538506		1.01	-1.12	1.1	1.09	-1.08	-1.04	1.02	-1.12	AW462130	t720?		LOC538506		1.06	1.12	1.07	1.34	-1.36	1.1	1.23	-1.36	AW462130	t15? t60? t120? t240?		LOC538506		1.08	-1.14	1.07	-1.08	1.43	-1.06	1.43	AW462130	t120? t240? t480?
539	Gjb3	gap junction protein, beta 3	1.19	-1.06	1.16	1.14	-1.06	-1.06	1.26	1.26	AW462132	t15? t30? t120?		Gjb3	gap junction protein, beta 3	1.02	1.08	-1.04	1.23	-1.01	-1.02	1.5	1.5	AW462132	t720?		Gjb3	gap junction protein, beta 3	1.08	-1.07	1.22	1.01	1.1	1.01	1.22	AW462132	t120?
540	EML5	echinoderm microtubule associated protein like 5	-1.03	1.42	1.03	1.08	-1.04	-1.01	-1.08	1.42	AW462133			EML5	echinoderm microtubule associated protein like 5	1.1	1.3	1.43	1.65	-1.65	1.23	1.12	1.65	AW462133	t720?		EML5	echinoderm microtubule associated protein like 5	1.1	1.2	-1.08	-1.17	1.8	-1.18	1.8	AW462133
541	Bt.50402		-1.06	1.2	1.19	-1.14	1.74	1.64	1.56	1.74	AW462141	t720?		Bt.50402		-1.05	1.1	1.03	1.17	1.5	1.36	1.51	1.51	AW462141	t15? t60? t120?		Bt.50402		-1.01	1.16	1.21	-1.1	1.15	1.24	1.24	AW462141	t60?
542	LOC616055		1.15	-1.04	-1.17	1.4	1.04	-1.1	-1.08	1.4	AW462142			LOC616055		1.24	1.07	1.16	1.59	1.13	-1.12	1.51	1.59	AW462142			LOC616055		1.11	1.11	-1.15	1.17	1.12	1.05	1.17	AW462142
543	AW462144		1.12	-1.06	1.19	1.1	1.18	1.19	1.16	1.19	AW462144	t120? t720?		AW462144		1.05	1.05	1.18	1.21	1.05	1.08	1.27	1.27	AW462144	t15? t120? t240?		AW462144		1.04	-1.03	1.11	1.03	1.19	1.1	1.19	AW462144	t60? t120? t480?
544	Crsp7	mediator complex subunit 26	-1.03	1.04	-1.02	1.07	-1.01	-1.01	-1.15	-1.15	AW462147			Crsp7	mediator complex subunit 26	-1.08	-1.04	1.12	1.26	-1.21	1.05	1.02	1.26	AW462147			Crsp7	mediator complex subunit 26	1.16	1.19	1.08	1.05	1.37	-1.04	1.37	AW462147
545	FAM100A	family with sequence similarity 100, member A	1.42	1.14	1.2	1.25	1.06	-1.24	1.28	1.42	AW462148			FAM100A	family with sequence similarity 100, member A	1.09	1.06	1.11	1.48	1.07	-1.13	2.53	2.53	AW462148			FAM100A	family with sequence similarity 100, member A	1.52	1.32	1.26	1.12	1.21	-1.11	1.52	AW462148
546	NAPE-PLD		1.08	-1.01	-1.02	1.03	1.04	-1.09	1.03	-1.09	AW462149			NAPE-PLD		1.03	-1.03	1.16	1.07	1.05	1.01	1.34	1.34	AW462149	t15? t60? t240? t480? t720?		NAPE-PLD		1.14	1.14	-1.06	1.07	1.07	-1.07	1.14	AW462149	t60? t120? t480?
547	Ddx28	DEAD (Asp-Glu-Ala-Asp) box polypeptide 28	1.25	-1.05	-1.09	1.03	-1.03	-1.05	1.04	1.25	AW462158	t720?		Ddx28	DEAD (Asp-Glu-Ala-Asp) box polypeptide 28	1.2	1.08	1.07	1.02	-1.01	-1.03	1.19	1.2	AW462158	t15? t480?		Ddx28	DEAD (Asp-Glu-Ala-Asp) box polypeptide 28	1.17	-1	-1.04	1.12	1.09	1	1.17	AW462158	t60? t120? t480?
548	LOC781738		-1.17	-1.04	-1.05	-1	-1.03	-1.03	-1.02	-1.17	AW462160	t30? t720?		LOC781738		1.04	1.04	1.05	1.05	1.04	-1.01	1.1	1.1	AW462160	t15? t30? t60? t120? t240? t480?		LOC781738		1.03	1.08	-1.04	-1.02	1.02	1.03	1.08	AW462160	t15? t30? t60? t120? t480?
549	FKSG24		-1.18	1.26	-2.58	-1.23	1.04	-1.22	-1.37	-2.58	AW462162	t15?		FKSG24		1.31	1.84	-1.1	-1.06	-1.2	-1.6	1.09	1.84	AW462162			FKSG24		-1.3	-1.18	-1.87	1.15	1.51	1.37	-1.87	AW462162
550	ARSB	arylsulfatase B	-1.04	1.04	-1.06	-1.04	1.22	-1.43	-1.23	-1.43	AW462172	t15? t120? t240? t480? t720?		ARSB	arylsulfatase B	1.05	1.22	1.07	-1.28	1.06	-1.34	-1.05	-1.34	AW462172	t60? t120? t240? t480? t720?		ARSB	arylsulfatase B	-1.01	-1.04	-1.02	1.35	1.25	-1.06	1.35	AW462172	t15? t120? t480?
551	Erc1		1.11	1.09	-1.25	-1.06	1.41	-1.02	1.23	1.41	AW462178			Erc1		1.06	1.62	-1.22	-1.1	1.37	1.11	1.85	1.85	AW462178			Erc1		1.38	-1.21	1.13	1.36	1.24	-1.06	1.38	AW462178
552	LOC727882		1.14	-1.08	1.01	1.14	-1.01	-1.03	-1.02	1.14	AW462179	t720?		LOC727882		1.05	-1.04	1.01	1.33	1.02	1.06	1.18	1.33	AW462179	t15? t60? t120?		LOC727882		1.08	1.04	1.06	-1.01	1.1	-1.06	1.1	AW462179	t60? t120? t480?
553	RRAD	Ras-related associated with diabetes	1.17	-1.03	-1.34	-1.05	1.22	1.07	1.35	1.35	AW462180			RRAD	Ras-related associated with diabetes	1.31	1.25	-1.13	1.06	1.09	-1.05	1.14	1.31	AW462180			RRAD	Ras-related associated with diabetes	1.05	-1.12	-1.07	1.08	1.29	1.13	1.29	AW462180
554	Gapdhs		-1.12	-1	1.08	1.38	-1.38	-1.16	-1.04	1.38	AW462184	t15?		Gapdhs		-1.49	1.04	-1.2	1.51	1.11	-1.07	1.53	1.53	AW462184			Gapdhs		1.27	1.11	1.36	1.13	-1.34	-1.06	1.36	AW462184
555	Mospd2	motile sperm domain containing 2	1.03	1.35	-1.4	1.02	1.15	1.14	-1.17	-1.4	AW462186			Mospd2	motile sperm domain containing 2	1.05	1.26	1.07	1.13	-1.02	1.07	-1.16	1.26	AW462186	t240?		Mospd2	motile sperm domain containing 2	1.06	1.22	-1.18	1.1	1.3	1.08	1.3	AW462186
556	FRAP1	FK506 binding protein 12-rapamycin associated protein 1	1.09	1.06	-1.28	-1.12	1.11	1.09	-1.15	-1.28	AW462187	t15?		FRAP1	FK506 binding protein 12-rapamycin associated protein 1	1.34	1.15	1.07	-1.15	1.2	1.05	-1.03	1.34	AW462187	t15?		FRAP1	FK506 binding protein 12-rapamycin associated protein 1	-1.17	1.04	-1.11	1.23	-1.02	1.07	1.23	AW462187	t480?
557	AW462189		-1.12	1.09	-1.16	-1.05	1.07	-1.1	-1.13	-1.16	AW462189	t15? t240? t720?		AW462189		1.05	1.17	1.08	1.02	1.09	-1.04	1.01	1.17	AW462189	t15? t30? t60? t120? t240? t480? t720?		AW462189		-1.11	1.03	-1.12	1.01	1.01	-1	-1.12	AW462189	t15? t30? t60? t120? t240? t480?
558	Itgbl1	integrin, beta-like 1	-1.02	1.12	-1.33	-1.2	-1.01	-1.05	-1.15	-1.33	AW462195	t15?		Itgbl1	integrin, beta-like 1	1.28	1.24	-1	-1.2	1.17	-1.23	-1.3	-1.3	AW462195	t720?		Itgbl1	integrin, beta-like 1	-1.36	-1.03	-1.2	1.24	-1.03	1.19	-1.36	AW462195
559	Cpsf2	cleavage and polyadenylation specific factor 2	-1.2	1.27	1.12	-1	-1.01	1.17	-1.02	1.27	AW462196			Cpsf2	cleavage and polyadenylation specific factor 2	-1.06	1.16	1.23	1.28	-1.21	1.19	1.1	1.28	AW462196			Cpsf2	cleavage and polyadenylation specific factor 2	-1.03	1.22	1.1	-1.03	1.39	-1.03	1.39	AW462196
560	Rcn3	reticulocalbin 3, EF-hand calcium binding domain	-1.09	1.12	1.01	1.06	-1.51	-1.13	1.13	-1.51	AW462197	t240?		Rcn3	reticulocalbin 3, EF-hand calcium binding domain	-1.11	1.16	-1.13	1.03	1.29	1.01	1.71	1.71	AW462197			Rcn3	reticulocalbin 3, EF-hand calcium binding domain	-1.02	1.08	1.04	1.16	-1.62	-1.06	-1.62	AW462197	t15? t60? t240?
561	CDC42SE2	CDC42 small effector 2	-1.02	1.32	1.24	-1.02	1.26	1.49	1.42	1.49	AW462199	t60?		CDC42SE2	CDC42 small effector 2	-1.02	1.14	1.34	1.58	1	1.37	1.67	1.67	AW462199			CDC42SE2	CDC42 small effector 2	1.26	1.39	1.03	-1.11	1.51	1.04	1.51	AW462199
562	SAMD4B		1.25	-1.08	1.33	-1.11	-1.02	1.02	-1.18	1.33	AW462207			SAMD4B		1.13	-1.1	1.31	-1.01	1.02	-1.01	1.04	1.31	AW462207	t60? t120?		SAMD4B		1.16	1.1	1.15	-1.01	1.09	1.04	1.16	AW462207	t60? t120? t480?
563	RANBP1	RAN binding protein 1	1.05	1.19	-1.36	-1.56	1.24	-1.05	-1.25	-1.56	AW462220	t15? t30?		RANBP1	RAN binding protein 1	1.13	1.48	1.11	-2.06	1.25	-1.22	-1.39	-2.06	AW462220	t30?		RANBP1	RAN binding protein 1	1.29	-1.09	-1.12	1.78	1.17	1.11	1.78	AW462220
564	LOC523046		1.33	-1.08	1.02	1.02	1.06	-1.09	-1.05	1.33	AW462221	t15?		LOC523046		-1.01	1.03	-1.14	1.15	1.15	-1.12	1.23	1.23	AW462221			LOC523046		1.19	1.04	1.13	-1	1.03	1.08	1.19	AW462221
565	TYRO3	TYRO3 protein tyrosine kinase (EC:2.7.10.1)	1.02	1.01	1.1	1.04	1.13	-1.11	1.14	1.14	AW462223			TYRO3	TYRO3 protein tyrosine kinase (EC:2.7.10.1)	-1.02	-1.06	1.09	1.03	1.19	1	1.08	1.19	AW462223	t60?		TYRO3	TYRO3 protein tyrosine kinase (EC:2.7.10.1)	1.1	1.13	1.1	1.12	1	-1.11	1.13	AW462223	t120? t480?
566	AW462226		1.3	1.03	-1.5	-1.52	1.1	-1.04	-1.13	-1.52	AW462226	t720?		AW462226		1.29	-1.01	1.01	1.56	-1.39	1.17	1.33	1.56	AW462226			AW462226		1.36	1.31	-1.09	-1.89	1.79	-1.14	-1.89	AW462226	t120?
567	TGFBR2	transforming growth factor, beta receptor II (70/80kDa)	-1	1.14	-1.26	-1.32	1.23	1.14	-1.02	-1.32	AW462227			TGFBR2	transforming growth factor, beta receptor II (70/80kDa)	1.1	-1.07	-1.03	-1.04	1.37	1.19	1.18	1.37	AW462227			TGFBR2	transforming growth factor, beta receptor II (70/80kDa)	-1	1.25	1.02	1.05	-1.04	1.04	1.25	AW462227
568	KBTBD11	kelch repeat and BTB (POZ) domain containing 11	-1.32	-1.15	1.07	1.15	1.05	-1.12	-1.01	-1.32	AW462229	t15? t30? t60? t120? t240? t480? t720?		KBTBD11	kelch repeat and BTB (POZ) domain containing 11	-1.13	-1.19	1.05	1.07	1.03	-1.17	1.08	-1.19	AW462229	t15? t30? t60? t120? t240? t480?		KBTBD11	kelch repeat and BTB (POZ) domain containing 11	1.06	1.09	1.14	1.16	1.1	1.07	1.16	AW462229	t15? t30? t60? t120? t480?
569	HEXA	hexosaminidase A (alpha polypeptide)	-1.04	1.01	1.03	1.02	1.04	-1.25	-1.11	-1.25	AW462231	t720?		HEXA	hexosaminidase A (alpha polypeptide)	-1.05	1.18	1	-1.11	1.08	-1.11	1.09	1.18	AW462231	t15? t60? t120? t240? t480? t720?		HEXA	hexosaminidase A (alpha polypeptide)	1.21	-1.09	1.06	1.17	1.08	1.02	1.21	AW462231	t15? t30? t60? t120? t240? t480?
570	LOC253039		1.09	1.15	-1.29	1.04	1.12	-1.02	-1.19	-1.29	AW462238			LOC253039		1.12	1.1	1.11	1.32	-1.16	1.09	-1.14	1.32	AW462238	t240? t480?		LOC253039		1.14	1.2	-1.21	-1.1	1.42	-1.05	1.42	AW462238
571	Dopey2	dopey family member 2	-1.11	-1.03	-1.01	1.06	-1.21	-1.23	1.02	-1.23	AW462239	t240? t720?		Dopey2	dopey family member 2	-1.17	1.03	-1.02	-1.06	1.16	-1.2	1.17	-1.2	AW462239	t15? t60? t120? t240? t480?		Dopey2	dopey family member 2	1.15	-1.02	-1	1.19	-1.26	1.03	-1.26	AW462239	t15? t30? t60? t120? t240? t480?
572	PEA15	phosphoprotein enriched in astrocytes 15	1.06	1.19	-1.19	1.12	1.04	1.04	1.1	1.19	AW462240			PEA15	phosphoprotein enriched in astrocytes 15	1.17	1.08	1.18	1.26	1	1.09	1.16	1.26	AW462240			PEA15	phosphoprotein enriched in astrocytes 15	1.06	1.19	-1.24	-1.03	1.15	1	-1.24	AW462240	t60? t120? t480?
573	ZNF143	zinc finger protein 143	1.17	1.06	-1.08	-1.23	1.23	1.48	1.04	1.48	AW462245			ZNF143	zinc finger protein 143	1.13	-1.01	-1.16	-1.19	1.21	1.32	1.1	1.32	AW462245			ZNF143	zinc finger protein 143	1.03	1.12	1.25	1.12	1.03	1.14	1.25	AW462245
574	PSMA4	proteasome (prosome, macropain) subunit, alpha type, 4 (EC:3.4.25.1)	-1.34	1.1	1.11	1.22	1.13	1.16	1.22	-1.34	AW462247			PSMA4	proteasome (prosome, macropain) subunit, alpha type, 4 (EC:3.4.25.1)	-1.01	1.11	1.23	1.52	-1.15	1.24	1.34	1.52	AW462247			PSMA4	proteasome (prosome, macropain) subunit, alpha type, 4 (EC:3.4.25.1)	-1.32	1.06	1.17	1.1	1.55	-1.09	1.55	AW462247
575	NAB1	NGFI-A binding protein 1 (EGR1 binding protein 1)	1.4	-1.4	2.32	1.28	-1.06	1.15	1.37	2.32	AW462250			NAB1	NGFI-A binding protein 1 (EGR1 binding protein 1)	1.07	1.17	1.63	1.32	1.04	1.04	1.8	1.8	AW462250	t720?		NAB1	NGFI-A binding protein 1 (EGR1 binding protein 1)	1.39	-1.34	1.75	1.2	1.09	1.15	1.75	AW462250
576	PIH1D1	PIH1 domain containing 1	-1.17	1.16	-1.62	-1.03	1.2	1.14	-1.19	-1.62	AW462252			PIH1D1	PIH1 domain containing 1	1.12	1.31	1.01	1	1.15	1.1	-1.06	1.31	AW462252			PIH1D1	PIH1 domain containing 1	-1.09	1.02	-1.26	1.21	1.15	-1.03	-1.26	AW462252
577	Dnajc8	DnaJ (Hsp40) homolog, subfamily C, member 8	-1.18	1.15	-1.21	1.27	1.53	1.19	1.02	1.53	AW462258			Dnajc8	DnaJ (Hsp40) homolog, subfamily C, member 8	1.02	1.08	1.05	1.59	1.23	1.22	-1.13	1.59	AW462258			Dnajc8	DnaJ (Hsp40) homolog, subfamily C, member 8	1.11	1.24	1	1.09	1.47	-1.06	1.47	AW462258
578	CHCHD3	coiled-coil-helix-coiled-coil-helix domain containing 3	1.03	-1.05	1.39	1.12	-1.16	-1.04	-1.24	1.39	AW462264			CHCHD3	coiled-coil-helix-coiled-coil-helix domain containing 3	-1.03	1.2	1.06	1.1	1.04	-1.04	1.04	1.2	AW462264			CHCHD3	coiled-coil-helix-coiled-coil-helix domain containing 3	1.09	-1.1	1.46	1.25	-1.08	-1.04	1.46	AW462264
579	Trappc1		1.06	1.04	-1.46	-1.07	1.12	-1.15	-1.81	-1.81	AW462274	t15?		Trappc1		1.31	1.21	1.15	-1.13	1.08	-1.2	-1.45	-1.45	AW462274			Trappc1		-1.15	-1.01	-1.31	1.27	1.19	-1.02	-1.31	AW462274
580	KCNJ8	potassium inwardly-rectifying channel, subfamily J, member 8	1.14	-1.05	-1.05	1.01	-1	-1.06	-1.01	1.14	AW462280	t720?		KCNJ8	potassium inwardly-rectifying channel, subfamily J, member 8	1.39	1.06	1	1.14	1.06	1.01	1.04	1.39	AW462280	t15? t60? t120? t240? t480? t720?		KCNJ8	potassium inwardly-rectifying channel, subfamily J, member 8	-1.09	-1.08	-1.04	-1.01	-1.02	1.05	-1.09	AW462280	t15? t30? t60? t120? t240? t480?
581	Prr13	proline rich 13	1.23	1.61	-1.28	1.08	-1.68	1.13	1.11	-1.68	AW462285			Prr13	proline rich 13	-1.15	1.16	-1.02	1.05	-1.06	1.07	2.84	2.84	AW462285	t720?		Prr13	proline rich 13	1.49	1.48	1.03	1.4	-1.23	1.05	1.49	AW462285
582	Nup50	nucleoporin 50	1.13	1.31	-1.54	-1.25	1.46	1.08	-1.88	-1.88	AW462294			Nup50	nucleoporin 50	1.52	1.81	-1.04	-1.61	1.62	-1.21	-1.17	1.81	AW462294			Nup50	nucleoporin 50	-1.23	-1.19	-1.07	1.72	1.1	1.28	1.72	AW462294
583	LOC618456		-1.03	1.01	-1.21	-1.09	-1.18	-1.34	-1.35	-1.35	AW462296			LOC618456		-1.04	1	1.15	1.05	-1.07	-1.14	-1.01	1.15	AW462296	t240? t480?		LOC618456		1.26	1.1	-1.32	-1.02	-1.02	-1.05	-1.32	AW462296	t60? t120? t480?
584	SEC13		-1.18	-1.07	1.15	-1.14	-1.36	-1.13	1.33	-1.36	AW462308			SEC13		-1.44	1.23	1.05	-1.27	-1.1	-1.03	1.47	1.47	AW462308			SEC13		1.33	-1.12	1.26	1.37	-1.15	-1.08	1.37	AW462308	t60?
585	Eps8l1	EPS8-like 1	1.32	-1.09	1.75	-1.02	-1.93	-1.03	1.29	-1.93	AW462315			Eps8l1	EPS8-like 1	-1.21	1.3	1.44	1.07	1.07	1.13	1.55	1.55	AW462315			Eps8l1	EPS8-like 1	1.48	-1.17	1.46	1.21	-1.71	-1.12	-1.71	AW462315
586	SHQ1		1.15	-1.12	1.22	1.12	-1.35	-1.02	1.26	-1.35	AW462316	t120? t720?		SHQ1		-1.13	1.1	1.17	1.08	-1.26	-1.01	1.18	-1.26	AW462316	t15? t60? t120? t240? t720?		SHQ1		1.29	-1.16	1.07	1.07	1.04	1.02	1.29	AW462316	t15? t60? t120? t480?
587	AW462324		1	-1.21	1.12	1.08	-1.11	-1.02	1.4	1.4	AW462324	t720?		AW462324		1.14	-1.15	1.09	1.21	-1.03	1.11	1.64	1.64	AW462324	t720?		AW462324		1.02	-1.02	1.05	-1.03	1.12	-1.05	1.12	AW462324	t15? t60? t120? t480?
588	ZYX	zyxin	-1.28	-1.03	-1.42	-1.11	1.18	-1.19	-1.15	-1.42	AW462325	t15? t30?		ZYX	zyxin	1.16	1.29	1.43	-1.26	1.13	-1.5	-1.02	-1.5	AW462325			ZYX	zyxin	-1.21	-1.07	-1.47	1.51	1.26	1.21	1.51	AW462325
589	Tgfb1i1	transforming growth factor beta 1 induced transcript 1	-1.32	1.36	-1.79	-1.2	1.36	-1.08	-1.55	-1.79	AW462329	t15? t30? t60? t120? t240?		Tgfb1i1	transforming growth factor beta 1 induced transcript 1	1.29	1.55	-1.01	-1.19	1.1	-1.39	-1.15	1.55	AW462329			Tgfb1i1	transforming growth factor beta 1 induced transcript 1	-1.36	1.02	-1.58	1.21	1.42	1.37	-1.58	AW462329
590	Grrp1	glycine/arginine rich protein 1	-1.01	1.03	-1.01	1.04	1	-1.08	1.03	-1.08	AW462333	t240? t480? t720?		Grrp1	glycine/arginine rich protein 1	1.02	1.05	1.03	-1.03	-1.05	-1.01	1.16	1.16	AW462333	t15? t30? t60? t120? t240? t480? t720?		Grrp1	glycine/arginine rich protein 1	1.08	1.08	-1.03	1.09	1.15	1.05	1.15	AW462333	t30? t60? t120? t240? t480?
591	VPS53	vacuolar protein sorting 53 homolog (S. cerevisiae)	1.06	-1.08	-1.05	1.03	-1.13	1.06	1.02	-1.13	AW462338			VPS53	vacuolar protein sorting 53 homolog (S. cerevisiae)	1.09	-1.1	1.01	1.02	-1.15	1.01	1.26	1.26	AW462338	t60? t240?		VPS53	vacuolar protein sorting 53 homolog (S. cerevisiae)	1.05	1.06	-1.04	1.18	1.14	1.06	1.18	AW462338	t30? t480?
592	UQCRC2	ubiquinol-cytochrome c reductase core protein II	1.16	1.3	-1.1	1.09	-1.13	-1.04	-1.36	-1.36	AW462339			UQCRC2	ubiquinol-cytochrome c reductase core protein II	-1.01	-1.03	1.16	1.28	1.05	-1.02	1.01	1.28	AW462339			UQCRC2	ubiquinol-cytochrome c reductase core protein II	1.03	1.46	-1.02	1.1	-1.01	-1.08	1.46	AW462339
593	Pdxp	pyridoxal (pyridoxine, vitamin B6) phosphatase	1.17	1.15	-1.13	-1	1.17	-1.23	-1.45	-1.45	AW462344	t240?		Pdxp	pyridoxal (pyridoxine, vitamin B6) phosphatase	1.15	-1.02	1.12	-1.07	1.1	-1.21	-1.03	-1.21	AW462344	t15? t30?		Pdxp	pyridoxal (pyridoxine, vitamin B6) phosphatase	1.28	1.35	-1.09	1.22	1.22	-1.04	1.35	AW462344	t15? t30? t480?
594	RPL23A	ribosomal protein L23a	-1.13	1.12	-1.48	-1.45	-1.09	-1.03	1.03	-1.48	AW462345	t15?		RPL23A	ribosomal protein L23a	1.07	1.12	-1.48	-2.02	1.01	-1.25	-1.23	-2.02	AW462345			RPL23A	ribosomal protein L23a	1.15	1.23	1.31	1.86	1.1	1.25	1.86	AW462345
595	Samm50	sorting and assembly machinery component 50 homolog (S. cerevisiae)	1.1	1.03	1.38	1.05	1.01	-1.15	1.04	1.38	AW462346			Samm50	sorting and assembly machinery component 50 homolog (S. cerevisiae)	-1.11	-1.01	1.02	1.51	1.12	1.13	1.07	1.51	AW462346	t120?		Samm50	sorting and assembly machinery component 50 homolog (S. cerevisiae)	1.32	1.16	1.37	-1.23	1.01	-1.2	1.37	AW462346
596	Dus2l		1.18	-1.01	1.04	1.04	-1.16	-1.07	1	1.18	AW462347	t15? t30? t60? t120? t240? t720?		Dus2l		-1.05	1.08	-1.05	1.06	-1.02	-1.03	1.24	1.24	AW462347	t15? t240? t480?		Dus2l		1.18	1.04	1.13	1.07	-1.03	-1.03	1.18	AW462347	t15? t60? t120? t240? t480?
597	Mrpl34	mitochondrial ribosomal protein L34	1.08	1.13	1.15	1.17	-1.65	-1.08	1.1	-1.65	AW462348	t15? t120?		Mrpl34	mitochondrial ribosomal protein L34	-1.57	-1.09	1.12	1.27	-1.2	-1.11	1.35	-1.57	AW462348			Mrpl34	mitochondrial ribosomal protein L34	1.72	1.48	1.15	1.08	-1.21	1.01	1.72	AW462348
598	Sdf4	stromal cell derived factor 4	-1.09	1.01	1.26	1.11	-1.28	-1.12	1.16	-1.28	AW462355			Sdf4	stromal cell derived factor 4	-1.22	1.23	1.44	1.33	1.3	-1.14	1.93	1.93	AW462355			Sdf4	stromal cell derived factor 4	1.08	-1.01	1.01	-1.02	-1.39	1.05	-1.39	AW462355
599	LOC514644		1.05	-1.06	1.05	1.01	-1.02	-1	1.13	1.13	AW462356			LOC514644		1.06	-1.09	1.11	1.23	-1.1	1.05	1.6	1.6	AW462356	t15? t720?		LOC514644		1.07	1.07	-1.01	-1.11	1.2	-1	1.2	AW462356	t30? t60? t120? t480?
600	PARP4	poly (ADP-ribose) polymerase family, member 4	1.03	1.13	-1.07	-1.3	1.07	1.14	1.12	-1.3	AW462359	t720?		PARP4	poly (ADP-ribose) polymerase family, member 4	1.04	1.1	-1.14	-1.29	1.19	-1.02	-1.05	-1.29	AW462359	t240? t480? t720?		PARP4	poly (ADP-ribose) polymerase family, member 4	1.01	1.01	1.03	1.1	-1.04	1.23	1.23	AW462359	t60? t120? t480?
601	AW462360		1.01	-1.22	1.18	-1.07	1.47	1.17	-1.33	1.47	AW462360			AW462360		1.27	-1.14	1.11	1.4	1.34	1.3	-1.15	1.4	AW462360			AW462360		-1.06	1.14	1.38	-1.15	1.25	-1.06	1.38	AW462360
602	DIAPH1	diaphanous homolog 1 (Drosophila)	1.3	1.17	-1.05	1.37	-1.23	-1.17	1.09	1.37	AW462364			DIAPH1	diaphanous homolog 1 (Drosophila)	1.13	1.28	1.14	1.34	1.15	-1.09	1.58	1.58	AW462364	t720?		DIAPH1	diaphanous homolog 1 (Drosophila)	1.16	1.11	1.01	1.27	-1.16	-1.01	1.27	AW462364
603	FAM18B		-1.09	1.2	1.07	1.23	1.12	1.31	1.71	1.71	AW462368			FAM18B		1.11	1.1	1.22	1.47	-1.03	1.31	1.76	1.76	AW462368	t720?		FAM18B		1.06	1.19	1.1	1.06	1.33	-1.01	1.33	AW462368
604	RARRES1	retinoic acid receptor responder (tazarotene induced) 1	1.18	1.17	-1.52	-1.1	-1.09	1.19	-1.89	-1.89	AW462369			RARRES1	retinoic acid receptor responder (tazarotene induced) 1	1.12	1.28	1.02	1.46	-1.11	1.14	-1.23	1.46	AW462369			RARRES1	retinoic acid receptor responder (tazarotene induced) 1	1.26	1.03	-1.18	-1.16	1.19	1.05	1.26	AW462369
605	FAM59A	family with sequence similarity 59, member A	1.17	1.14	1.05	1.26	-1.04	-1.06	1.36	1.36	AW462378	t120?		FAM59A	family with sequence similarity 59, member A	1.12	1.3	1.14	1.44	1.22	-1.16	1.84	1.84	AW462378			FAM59A	family with sequence similarity 59, member A	-1.05	1.01	1.01	1.01	-1.12	1.16	1.16	AW462378
606	Ppt1	palmitoyl-protein thioesterase 1	1.3	1.15	-1.18	-1.13	1.06	1.14	-1.01	1.3	AW462379			Ppt1	palmitoyl-protein thioesterase 1	1.19	1.24	1.07	1.26	1.14	1.17	1.15	1.26	AW462379			Ppt1	palmitoyl-protein thioesterase 1	1.22	1.08	1.03	-1.11	1.05	-1.03	1.22	AW462379
607	Mib2		-1.14	1.24	-1.55	-1.14	1.05	-1.02	-1.58	-1.58	AW462384	t15? t30? t60? t240? t480?		Mib2		1.25	1.35	1.04	-1.24	-1.02	-1.05	-1.33	1.35	AW462384	t15? t480?		Mib2		-1.21	-1.03	-1.36	1.21	1.25	1.02	-1.36	AW462384	t60? t480?
608	STX1A	syntaxin 1A (brain)	1.06	1.26	1.49	-1.13	1.08	-1.24	1.21	1.49	AW462385	t15? t30? t60?		STX1A	syntaxin 1A (brain)	1.05	1.12	1.44	-1.58	-1.31	-1.3	-1.14	-1.58	AW462385	t120?		STX1A	syntaxin 1A (brain)	1.45	1.3	1.21	1.37	1.72	1.04	1.72	AW462385	t15?
609	Sra1	steroid receptor RNA activator 1	1.13	-1.05	-1.21	-1.1	1.12	1.2	1.33	1.33	AW462388			Sra1	steroid receptor RNA activator 1	1.12	1.02	1.06	1.23	1.05	1.14	1.21	1.23	AW462388			Sra1	steroid receptor RNA activator 1	1.22	1.08	-1.04	-1.11	1.24	1.06	1.24	AW462388
610	NAG8		-1	-1.02	1.05	1.08	1.14	1.03	1.01	1.14	AW462390	t30? t120? t720?		NAG8		1.08	1.24	1.14	1.1	1.04	1.11	1.1	1.24	AW462390	t15? t30? t60? t120? t240? t480?		NAG8		1.08	1.26	-1.01	1.06	1.17	1.01	1.26	AW462390	t30? t60? t120? t480?
611	Cd163	CD163 antigen	-1.2	1.02	-1.17	-1.06	1.05	-1.01	1.03	-1.2	AW462395	t240? t480? t720?		Cd163	CD163 antigen	1.14	1.18	1.12	-1.07	1.04	1.02	-1.36	-1.36	AW462395	t15? t30? t60? t120? t240? t480? t720?		Cd163	CD163 antigen	-1.32	-1.06	-1.21	1.09	1	1.04	-1.32	AW462395	t15? t30? t60? t120? t240? t480?
612	KIAA1012		1.19	-1.03	1.17	1.33	1.1	1.26	-1.11	1.33	AW462397	t120?		KIAA1012		1.09	1.08	1.22	1.85	1.05	1.19	1.17	1.85	AW462397	t120?		KIAA1012		1.13	1.03	1.14	-1.11	1.16	1.03	1.16	AW462397
613	LOC530703		1.03	-1.04	1.01	1.07	1.02	1.05	1.06	1.07	AW462404	t15? t60? t120? t240? t480? t720?		LOC530703		1.13	1.11	1.01	1.2	1.01	1.04	1.06	1.2	AW462404	t15? t30? t60? t120? t240? t480? t720?		LOC530703		1.09	1.03	1.03	-1.08	1.09	1.07	1.09	AW462404	t15? t30? t60? t120? t240? t480?
614	Npc1	Niemann Pick type C1	1.04	-1.17	1.33	1	-1.11	1.1	1.29	1.33	AW462405	t60?		Npc1	Niemann Pick type C1	-1.06	-1.01	1.06	1.29	1.18	1.17	1.55	1.55	AW462405	t15? t60? t120?		Npc1	Niemann Pick type C1	1.11	-1.06	1.37	-1.09	-1.14	-1.07	1.37	AW462405	t30? t480?
615	Eif2ak1	eukaryotic translation initiation factor 2 alpha kinase 1	-1.09	-1.03	1.02	-1	1.13	1.05	1.09	1.13	AW462406	t480? t720?		Eif2ak1	eukaryotic translation initiation factor 2 alpha kinase 1	-1.02	-1.01	1.07	1.06	1.06	1.05	1.12	1.12	AW462406	t15? t30? t60? t120? t240? t480? t720?		Eif2ak1	eukaryotic translation initiation factor 2 alpha kinase 1	1.07	1.07	-1.04	-1	1.11	1.1	1.11	AW462406	t15? t30? t60? t120? t240? t480?
616	FZD5	frizzled homolog 5 (Drosophila)	1.01	1.2	-1.97	-1.11	-1.21	-1.24	-1.02	-1.97	AW462410	t15? t30?		FZD5	frizzled homolog 5 (Drosophila)	-1.14	1.7	-1.19	-1.16	1.1	-1.11	1.16	1.7	AW462410			FZD5	frizzled homolog 5 (Drosophila)	1.31	-1.23	-1.34	1.28	1.08	-1.06	-1.34	AW462410	t240?
617	FAM53C		1.32	-1.02	1.71	1.15	-1.14	1.19	-1.04	1.71	AW462414			FAM53C		1.2	-1.62	1.41	1.28	1.04	1.31	1.26	-1.62	AW462414	t30?		FAM53C		1.21	1.83	1.38	1.12	1.01	-1	1.83	AW462414	t30?
618	EHMT1	euchromatic histone-lysine N-methyltransferase 1	1.32	-1.11	1.18	1.02	-1.18	-1.09	-1.4	-1.4	AW462417			EHMT1	euchromatic histone-lysine N-methyltransferase 1	1.12	1.15	1.15	1.2	1.04	-1.02	1.02	1.2	AW462417			EHMT1	euchromatic histone-lysine N-methyltransferase 1	1.27	-1.06	1.23	1.05	-1.06	-1.09	1.27	AW462417
619	Fyco1	FYVE and coiled-coil domain containing 1	1.25	1.07	-1.27	-1.05	-1.04	1.07	-1.32	-1.32	AW462419			Fyco1	FYVE and coiled-coil domain containing 1	1.81	1.08	1.24	-1.09	1.15	-1.07	-1.06	1.81	AW462419	t15?		Fyco1	FYVE and coiled-coil domain containing 1	-1.27	1.07	-1.3	1.25	-1.05	1.18	-1.3	AW462419	t480?
620	Eif4h		-1.26	1	1.06	-1.08	-1.02	1.08	-1.02	-1.26	AW462423			Eif4h		-1.23	1.08	-1.07	-1.03	1.34	1.09	-1.11	1.34	AW462423			Eif4h		1.03	1.03	1.26	1.26	-1.21	-1.08	1.26	AW462423
621	Thap4	THAP domain containing 4	-1.3	-1.17	1.12	1.07	1.09	1.06	1.01	-1.3	AW462428			Thap4	THAP domain containing 4	-1.08	-1.01	1.11	1.33	-1.09	1.19	1.2	1.33	AW462428	t15? t60? t120? t240? t480?		Thap4	THAP domain containing 4	-1.14	-1.07	1.03	-1.13	1.3	-1.04	1.3	AW462428	t15? t30? t60? t120? t480?
622	Tmcc3		1.19	-1.03	1.18	1.12	-1.35	-1.02	1.46	1.46	AW462429	t15? t30? t120? t720?		Tmcc3		-1.35	1.28	1.13	1.27	1.18	1.05	1.89	1.89	AW462429			Tmcc3		1.47	-1.24	1.16	1	-1.33	-1.06	1.47	AW462429
623	SLC9A2	solute carrier family 9 (sodium/hydrogen exchanger), member 2	1.04	1.02	1.08	-1.08	-1.17	-1.02	-1.11	-1.17	AW462434	t120? t240? t480? t720?		SLC9A2	solute carrier family 9 (sodium/hydrogen exchanger), member 2	-1.06	1.19	-1.06	-1.08	1.05	1.08	1.08	1.19	AW462434	t15? t30? t60? t120? t240? t480? t720?		SLC9A2	solute carrier family 9 (sodium/hydrogen exchanger), member 2	1.23	-1.08	1.09	-1.01	-1.14	-1.04	1.23	AW462434	t15? t30? t60? t120? t240? t480?
624	Got2	glutamic-oxaloacetic transaminase 2, mitochondrial (aspartate aminotransferase 2) (EC:2.6.1.1)	-1.04	1.09	-1.01	1.18	1	-1.07	1.04	1.18	AW462435			Got2	glutamic-oxaloacetic transaminase 2, mitochondrial (aspartate aminotransferase 2) (EC:2.6.1.1)	1.01	-1.08	1.21	1.18	1.07	-1.03	1.3	1.3	AW462435			Got2	glutamic-oxaloacetic transaminase 2, mitochondrial (aspartate aminotransferase 2) (EC:2.6.1.1)	1.06	1.34	1.01	1.23	1.13	-1.07	1.34	AW462435
625	LOC552891		-1.14	1.07	1.22	1.04	1.1	1.14	1.16	1.22	AW462436			LOC552891		-1.03	1.08	1.29	1.42	1.15	1.09	1.28	1.42	AW462436			LOC552891		1.18	1.16	1.23	-1	1.17	1.03	1.23	AW462436
626	Saps2	SAPS domain family, member 2	1.44	1.08	1.08	-1.11	-1.23	-1.28	1.07	1.44	AW462437			Saps2	SAPS domain family, member 2	-1.24	1.1	-1.05	-1.34	-1	-1.19	1.31	-1.34	AW462437	t15?		Saps2	SAPS domain family, member 2	1.83	1.1	1.18	1.32	-1.09	-1.04	1.83	AW462437	t60? t120? t240? t480?
627	Bt.65239		1.2	-1	1.03	-1.04	-1.02	1.12	1.31	1.31	AW462445	t720?		Bt.65239		-1.03	1.13	-1.1	1.05	1.15	1.02	1.18	1.18	AW462445	t480?		Bt.65239		1.13	-1.01	1.07	1	-1.06	1.18	1.18	AW462445	t60? t120?
628	Rbpj		1.04	-1.03	1.14	1.04	-1.03	-1.07	-1.08	1.14	AW462450	t720?		Rbpj		-1.13	1.23	1.04	-1.07	-1.01	1	-1.05	1.23	AW462450	t15? t60? t120? t240? t480?		Rbpj		1.16	-1.14	1.15	1.25	1.01	-1.05	1.25	AW462450	t30? t60? t120? t240? t480?
629	AW462452		1.02	-1.07	1.1	-1.03	-1.12	-1.08	1.03	-1.12	AW462452	t240? t720?		AW462452		-1.02	1.05	-1.12	1.12	-1.04	-1.02	1.11	1.12	AW462452	t15? t60? t120? t240? t480?		AW462452		1.11	-1.07	1.18	-1.1	1.01	-1.01	1.18	AW462452	t15? t30? t60? t120? t240? t480?
630	Eva1	myelin protein zero-like 2	-1.07	1.04	-1.07	1.08	1.13	-1.06	-1	1.13	AW462459	t480?		Eva1	myelin protein zero-like 2	-1.11	1.06	1.06	1.02	1.09	-1.08	-1.03	-1.11	AW462459	t15? t60? t240? t480?		Eva1	myelin protein zero-like 2	1.42	1.03	-1.07	1.08	1.04	1.07	1.42	AW462459	t15? t30? t60? t120? t480?
631	MKX		1.02	1.01	1.06	-1.05	-1.02	1.05	1.23	1.23	AW462460	t720?		MKX		1.13	1.07	1.03	1.25	-1.03	1.12	1.08	1.25	AW462460	t15? t240? t480?		MKX		-1.04	1.06	1.01	-1.17	1.15	1.02	-1.17	AW462460	t60? t120? t240? t480?
632	Crebl1	cAMP responsive element binding protein-like 1	1.06	-1.12	-1.12	1.15	-1.17	1.11	1	-1.17	AW462462			Crebl1	cAMP responsive element binding protein-like 1	1.18	-1.12	1.15	1.38	-1.25	1.16	1.22	1.38	AW462462			Crebl1	cAMP responsive element binding protein-like 1	1.09	1.1	-1.07	1.03	1.27	1.01	1.27	AW462462
633	SOD1	superoxide dismutase 1, soluble (amyotrophic lateral sclerosis 1 (adult))	-1.4	1.3	-1.21	1.14	1.26	1.01	-1.64	-1.64	AW462466	t15?		SOD1	superoxide dismutase 1, soluble (amyotrophic lateral sclerosis 1 (adult))	-1.06	1.12	1.14	1.17	1.42	-1.16	-1.61	-1.61	AW462466			SOD1	superoxide dismutase 1, soluble (amyotrophic lateral sclerosis 1 (adult))	-1.27	1.31	-1.08	1.27	1.04	1.08	1.31	AW462466
634	FLJ43339		1.09	-1.24	1.33	1.11	-1.07	-1.06	1.12	1.33	AW462469	t30? t720?		FLJ43339		1.01	1.03	1.07	1.19	-1.07	1.02	1.11	1.19	AW462469			FLJ43339		1	-1.05	1.23	1.08	1.08	-1.07	1.23	AW462469	t120?
635	FPGS	folylpolyglutamate synthase	-1.06	1.08	-1.27	-1.13	1.18	1.03	-1.04	-1.27	AW462477			FPGS	folylpolyglutamate synthase	1.09	1.23	1.03	1.1	1.23	-1.01	1.41	1.41	AW462477			FPGS	folylpolyglutamate synthase	-1.01	1.08	-1.05	1.08	1.16	1.08	1.16	AW462477
636	Bt.1054		1.05	1.15	-1.08	1.04	1.03	-1.09	1.04	1.15	AW462481	t15? t30? t120? t240?		Bt.1054		-1.11	1.09	1.02	1.1	1.19	-1.09	1.36	1.36	AW462481	t15?		Bt.1054		1.1	1.12	-1.09	1.03	-1.07	1.02	1.12	AW462481	t60? t120? t480?
637	Lyst	lysosomal trafficking regulator	-1.18	1.12	-1.01	-1.07	1.06	1.13	1.26	1.26	AW462482	t15? t240?		Lyst	lysosomal trafficking regulator	1.02	1.1	1.36	1.01	1.23	-1	-1.09	1.36	AW462482	t60? t120? t240?		Lyst	lysosomal trafficking regulator	-1.11	1.17	-1.16	1.08	-1.1	1.14	1.17	AW462482	t15? t60?
638	LOC538861		-1.17	-1.02	1.01	1.01	1.21	1.24	1.41	1.41	AW462486	t30? t240? t480? t720?		LOC538861		1.06	1.02	1.11	1.07	1.08	1.15	1.14	1.15	AW462486	t15? t30? t60? t120? t240? t480?		LOC538861		-1.13	1.03	-1.1	-1.02	1.15	1.11	1.15	AW462486	t15? t30? t60? t120? t240? t480?
639	Btbd7	BTB (POZ) domain containing 7	-1.06	1.17	-1.08	-1.36	-1.21	1.07	1.16	-1.36	AW462492			Btbd7	BTB (POZ) domain containing 7	-1.15	1.44	-1.31	-1.33	1.13	1.05	1.05	1.44	AW462492			Btbd7	BTB (POZ) domain containing 7	1.25	-1.13	1.22	1.1	-1.25	1.1	1.25	AW462492	t60?
640	Tpd52	tumor protein D52	-1.2	1.01	-1.11	-1.21	1.3	1.04	-1.38	-1.38	AW462495			Tpd52	tumor protein D52	1.05	1.01	-1.01	1.22	1.43	1.08	-1.06	1.43	AW462495			Tpd52	tumor protein D52	1.01	1.19	1.17	-1.02	1.02	-1.05	1.19	AW462495
641	TRIP6	thyroid hormone receptor interactor 6	1.04	1.13	-1.89	-1.05	-1.05	-1.15	1.13	-1.89	AW462496			TRIP6	thyroid hormone receptor interactor 6	1.09	1.34	-1.23	1.05	1	-1.39	-1.12	-1.39	AW462496			TRIP6	thyroid hormone receptor interactor 6	1.14	-1.16	-1.39	1.12	1.21	1.23	-1.39	AW462496
642	SNAP23	synaptosomal-associated protein, 23kDa	-1.21	1.06	-1.32	-1.07	1.31	1.41	1.39	1.41	AW462506			SNAP23	synaptosomal-associated protein, 23kDa	1.22	1.15	1.01	1.14	1.36	1.2	1.08	1.36	AW462506	t15?		SNAP23	synaptosomal-associated protein, 23kDa	-1.18	1.1	-1.05	1.01	1.01	1.18	1.18	AW462506
643	LOC523454		1.03	-1.02	-1.23	-1.13	1.06	1.01	1.04	-1.23	AW462509			LOC523454		1.17	1.03	1.07	1.01	-1.01	1.01	-1.09	1.17	AW462509	t60? t240?		LOC523454		-1.02	1.07	-1.09	-1.01	1.17	1	1.17	AW462509	t480?
644	SIAH2	seven in absentia homolog 2 (Drosophila)	1.04	-1.03	-1.36	1.07	1.17	1.06	-1.5	-1.5	AW462510			SIAH2	seven in absentia homolog 2 (Drosophila)	1.22	1.12	1.06	1.27	1.24	-1.02	-1.16	1.27	AW462510			SIAH2	seven in absentia homolog 2 (Drosophila)	-1.07	1.03	-1.09	1.04	1.06	1.06	-1.09	AW462510
645	GSPT1	G1 to S phase transition 1	1.1	1.07	-1.22	1.19	1.2	1.21	1.15	-1.22	AW462514			GSPT1	G1 to S phase transition 1	1.2	1.22	1.16	1.13	1.05	1.04	1.28	1.28	AW462514			GSPT1	G1 to S phase transition 1	-1.04	1.01	-1.07	1.31	1.32	1.08	1.32	AW462514
646	GAA	glucosidase, alpha; acid (Pompe disease, glycogen storage disease type II)	1.15	-1.01	-1.53	1.03	-1.06	1.09	-1.15	-1.53	AW462517			GAA	glucosidase, alpha; acid (Pompe disease, glycogen storage disease type II)	1.76	1.48	1.11	-1.11	-1.08	-1.11	-1.01	1.76	AW462517			GAA	glucosidase, alpha; acid (Pompe disease, glycogen storage disease type II)	-1.2	-1.22	-1.36	1.55	1.23	1.25	1.55	AW462517
647	CCDC100		-1.09	-1.2	-1.33	-1.26	1.11	1.04	-1.16	-1.33	AW462518			CCDC100		-1.01	1.01	-1.08	1.14	1.15	1.11	-1.07	1.15	AW462518	t120?		CCDC100		1.16	-1.09	1.04	-1.02	1.06	-1.03	1.16	AW462518
648	CHKB	choline kinase beta	1.17	1.13	-1.34	-1.38	1.03	1.05	-1.29	-1.38	AW462519			CHKB	choline kinase beta	1.3	1.34	1.05	-1.47	1.01	-1.03	-1.19	-1.47	AW462519	t15?		CHKB	choline kinase beta	-1.01	-1.11	-1.24	1.24	1.17	1.11	1.24	AW462519
649	Abcg2	ATP-binding cassette, sub-family G (WHITE), member 2	1.03	1.2	-1.8	-1.03	-1.27	-1.4	-2.08	-2.08	AW462521			Abcg2	ATP-binding cassette, sub-family G (WHITE), member 2	1.04	1.14	-1.12	1.3	-1.12	-1.29	-1.05	1.3	AW462521			Abcg2	ATP-binding cassette, sub-family G (WHITE), member 2	1.25	1.23	-1.2	1.01	1.08	1.01	1.25	AW462521
650	LOC534669		1.02	-1.1	1.23	1.04	-1.06	-1.01	-1.08	1.23	AW462522			LOC534669		-1.01	1	-1.02	1.18	-1.02	1.06	-1.01	1.18	AW462522	t15? t60? t120? t240? t480?		LOC534669		1.06	-1.04	1.24	-1.05	1.03	-1.05	1.24	AW462522	t60? t120? t480?
651	Rps18	ribosomal protein S18	-1.61	1.09	-1.75	1.21	1.11	-1.12	-1.73	-1.75	AW462524			Rps18	ribosomal protein S18	-1.03	1.13	-1.01	1.24	1.29	-1	-1.48	-1.48	AW462524			Rps18	ribosomal protein S18	-1.46	1.18	-1.39	1.3	1.08	-1.08	-1.46	AW462524
652	PLB1		1.15	-1.19	1.01	1.35	-1.08	1.21	-1.17	1.35	AW462527			PLB1		1.42	1.04	1.27	1.63	1.13	1.02	1.62	1.63	AW462527			PLB1		-1.07	1.01	-1.01	1.05	-1.01	1.24	1.24	AW462527
653	Msra	methionine sulfoxide reductase A	-1.02	1.02	1.27	1.12	1.01	-1	-1.02	1.27	AW462535			Msra	methionine sulfoxide reductase A	-1.03	-1.02	1.15	1.19	1.14	1.06	1.25	1.25	AW462535			Msra	methionine sulfoxide reductase A	1.18	1.14	1.23	1.1	1	-1.01	1.23	AW462535
654	Sesn1		-1.09	1.11	-1.37	-1.18	1.04	-1.07	-1.3	-1.37	AW462537			Sesn1		1.19	1.18	-1.16	1.03	-1.07	1.21	-1.34	-1.34	AW462537	t720?		Sesn1		-1.17	1.04	1.07	1.11	1.25	-1.21	1.25	AW462537
655	MAPK6	mitogen-activated protein kinase 6	1.08	1.56	-1.55	1.08	1.4	1.36	1.36	1.56	AW462539			MAPK6	mitogen-activated protein kinase 6	1.43	1.33	-1.05	1.18	1.48	1.14	-1.02	1.48	AW462539			MAPK6	mitogen-activated protein kinase 6	-1.29	1.31	-1.07	1.24	1.05	1.18	1.31	AW462539
656	Atp6v0e	ATPase, H+ transporting, lysosomal V0 subunit E	1.15	1.1	1.08	1.02	1.03	-1.01	1.05	1.15	AW462542			Atp6v0e	ATPase, H+ transporting, lysosomal V0 subunit E	1.17	-1.08	1.23	1.2	-1.21	1.04	1.28	1.28	AW462542	t15?		Atp6v0e	ATPase, H+ transporting, lysosomal V0 subunit E	1.09	1.22	-1.06	-1	1.34	1.04	1.34	AW462542	t120? t480?
657	ATP6AP1	ATPase, H+ transporting, lysosomal accessory protein 1	-1.11	-1.07	1.01	-1.13	1.21	1.11	1.41	1.41	AW462544			ATP6AP1	ATPase, H+ transporting, lysosomal accessory protein 1	1.01	-1.07	-1.04	1.03	1.38	1.06	-1.1	1.38	AW462544			ATP6AP1	ATPase, H+ transporting, lysosomal accessory protein 1	1.06	1.1	1.32	1.11	-1.06	1.06	1.32	AW462544
658	Copz2	coatomer protein complex, subunit zeta 2	1.04	1.13	-1.05	-1.11	1.11	-1.09	-1.19	-1.19	AW462546	t15? t30? t60? t120? t240? t480? t720?		Copz2	coatomer protein complex, subunit zeta 2	1.08	1.08	1.03	-1.14	1.05	-1.03	1.04	-1.14	AW462546	t15? t60? t240? t480? t720?		Copz2	coatomer protein complex, subunit zeta 2	1.75	1.12	-1.05	1.1	1.16	1.03	1.75	AW462546	t15? t60? t120? t240? t480?
659	MGC142673		1.04	-1.18	1.43	1.08	-1.54	1.1	1.02	-1.54	AW462550	t15? t30?		MGC142673		-1.46	1.16	1.1	1.06	1.06	1.18	1.3	-1.46	AW462550			MGC142673		1.56	-1.18	1.3	1.13	-1.43	-1.03	1.56	AW462550
660	RP5-1022P6.2	hypothetical protein KIAA1434	1.24	-1.07	1.53	-1.02	1.16	1.42	1.98	1.98	AW462554			RP5-1022P6.2	hypothetical protein KIAA1434	1.1	1.13	1.37	1.24	1.25	1.12	1.77	1.77	AW462554	t60? t720?		RP5-1022P6.2	hypothetical protein KIAA1434	1.1	-1.06	1.25	-1.07	1.03	1.24	1.25	AW462554
661	MLKL		1.08	1.06	-1.07	-1.02	1.09	1.06	1.15	1.15	AW462569	t30? t240? t480? t720?		MLKL		1.02	1.19	-1.22	1.04	1.24	1.02	1.28	1.28	AW462569	t15? t30? t60? t240? t480?		MLKL		1.17	-1.07	1.1	-1.03	-1.02	1.07	1.17	AW462569	t30? t60? t120? t240? t480?
662	MGC137146		1.27	-1.09	1.57	1.37	1.11	1.24	-1.04	1.57	AW462574			MGC137146		1.2	1.05	1.27	1.54	-1.28	1.34	1.94	1.94	AW462574	t720?		MGC137146		1.05	-1.01	1.3	1.06	1.58	-1.05	1.58	AW462574
663	PANK4	pantothenate kinase 4	1.14	-1.11	-1.01	-1.12	-1.2	-1.04	1.02	-1.2	AW462578	t720?		PANK4	pantothenate kinase 4	1.02	1.07	1	-1.05	-1.05	1.03	-1.09	-1.09	AW462578	t30? t120? t240? t480? t720?		PANK4	pantothenate kinase 4	1.1	-1.1	1.08	1.04	-1.05	-1.02	1.1	AW462578	t30? t60? t120? t480?
664	Ccdc49	coiled-coil domain containing 49	1.23	1.11	1.06	-1.04	-1.02	1.16	1.33	1.33	AW462580			Ccdc49	coiled-coil domain containing 49	1.04	-1.08	1.2	1.31	-1.14	1.15	1.86	1.86	AW462580	t720?		Ccdc49	coiled-coil domain containing 49	1.28	1.37	1.05	-1.07	1.3	1.02	1.37	AW462580
665	Slco2a1	solute carrier organic anion transporter family, member 2a1	1.14	-1	-1.14	1.01	-1.33	1.06	-1.16	-1.33	AW462583			Slco2a1	solute carrier organic anion transporter family, member 2a1	1.24	1.01	1.12	1.23	-1.03	1.15	1.35	1.35	AW462583			Slco2a1	solute carrier organic anion transporter family, member 2a1	1.07	1.11	-1.11	-1.03	-1.05	-1.04	1.11	AW462583
666	GUSB	glucuronidase, beta	1.07	-1.06	-1.34	-1.24	1.27	-1.05	-1.47	-1.47	AW462584			GUSB	glucuronidase, beta	1.21	1.35	1.05	-1.16	1.35	1.05	-1.31	1.35	AW462584			GUSB	glucuronidase, beta	1.02	-1.2	-1.05	1.22	1.05	-1.04	1.22	AW462584
667	DGKA	diacylglycerol kinase, alpha 80kDa	1.3	1.04	1.03	1.25	-1.2	1.18	1.11	1.3	AW462585			DGKA	diacylglycerol kinase, alpha 80kDa	1.57	-1.07	1.35	1.39	-1.12	1.27	1.38	1.57	AW462585	t480?		DGKA	diacylglycerol kinase, alpha 80kDa	1.01	1.23	-1.06	1.14	1.14	1.01	1.23	AW462585
668	AW462587		-1.03	1.04	1.03	1.04	-1.02	-1.05	-1.09	-1.09	AW462587	t480? t720?		AW462587		1.02	1.24	1.15	1.01	-1.04	-1.03	1.17	1.24	AW462587	t15? t60? t120? t240? t480? t720?		AW462587		1.1	-1.02	-1.06	1.04	1.07	1.13	1.13	AW462587	t30? t60? t120? t240? t480?
669	Zzef1	zinc finger, ZZ-type with EF hand domain 1	-1.02	1.01	1.2	-1.01	1.12	-1.01	-1.04	1.2	AW462588			Zzef1	zinc finger, ZZ-type with EF hand domain 1	-1.02	1.04	1.15	1.13	1.07	1.03	1.11	1.15	AW462588	t60? t120? t480?		Zzef1	zinc finger, ZZ-type with EF hand domain 1	1.1	1.05	1.1	-1.03	1.08	-1.01	1.1	AW462588	t60? t120? t480?
670	TMEM97		1.1	-1.17	-1.24	-1.1	-1.06	-1.03	-1.27	-1.27	AW462592			TMEM97		1.23	1.04	1.09	-1.08	1.16	-1.06	-1.32	-1.32	AW462592	t15? t60? t120? t240? t480?		TMEM97		1.02	-1.11	-1.11	1.14	-1.15	1.07	-1.15	AW462592	t60? t480?
671	RP13-15M17.2		1.01	-1.09	1.13	1.1	-1.06	1.08	-1.11	1.13	AW462594	t720?		RP13-15M17.2		-1.03	1.1	-1.03	1.21	1.07	1.15	-1.12	1.21	AW462594	t720?		RP13-15M17.2		1.05	-1.11	1.15	-1.01	-1.06	-1.03	1.15	AW462594	t60? t120? t480?
672	Prss22	protease, serine, 22	-1.05	-1.03	1.05	-1.38	-1.17	1.04	1.4	1.4	AW462598			Prss22	protease, serine, 22	-1.3	1.01	-1.13	-1.32	1.14	1.17	1.22	-1.32	AW462598			Prss22	protease, serine, 22	1.43	-1.01	1.26	1.03	-1.21	-1.04	1.43	AW462598	t60? t120? t240?
673	EFNA4	ephrin-A4	1.16	-1.05	1.14	-1.08	-1.09	-1.11	1.25	1.25	AW462601			EFNA4	ephrin-A4	1.14	-1.15	1.06	1.27	-1.06	1.13	1.22	1.27	AW462601	t720?		EFNA4	ephrin-A4	1.19	1.26	1.2	-1.1	1.11	-1.16	1.26	AW462601
674	SMAD1	SMAD family member 1	1.26	1.05	1.18	1.01	1.15	-1.21	-1.32	-1.32	AW462606	t15? t30?		SMAD1	SMAD family member 1	-1.18	1.16	-1.05	1.01	1.28	-1.16	1.21	1.28	AW462606			SMAD1	SMAD family member 1	1.5	1.07	1.35	1.16	-1.05	-1.07	1.5	AW462606
675	CLDN3	claudin 3	-1.05	-1.24	1.04	-1.11	-1.18	1.44	1.32	1.44	AW462608	t720?		CLDN3	claudin 3	-1.44	1.05	-1.05	1.11	1.57	1.73	1.32	1.73	AW462608	t15? t30? t480?		CLDN3	claudin 3	1.39	-1.27	1.24	-1.09	-1.73	-1.12	-1.73	AW462608	t15? t30? t120? t240? t480?
676	MMP15	matrix metallopeptidase 15 (membrane-inserted)	1.1	1.01	1.07	-1.25	-1.3	-1.11	-1.08	-1.3	AW462610	t240? t720?		MMP15	matrix metallopeptidase 15 (membrane-inserted)	-1.14	1.34	-1.06	-1.22	1.14	-1.03	1.08	1.34	AW462610	t15? t480?		MMP15	matrix metallopeptidase 15 (membrane-inserted)	1.29	-1.27	1.13	1.1	-1.31	-1.02	-1.31	AW462610	t60? t120? t240? t480?
677	Sh2d4a	SH2 domain containing 4A	1.23	-1.06	1.16	-1.05	-1.23	1.02	-1.05	1.23	AW462616			Sh2d4a	SH2 domain containing 4A	1.04	1.35	-1.06	1.1	-1.02	1.15	1.26	1.35	AW462616			Sh2d4a	SH2 domain containing 4A	1.18	-1.19	1.2	1.05	-1.06	-1.08	1.2	AW462616
678	Grpel2	GrpE-like 2, mitochondrial	-1.1	1.07	1.27	1.22	1.27	1.35	1.18	1.35	AW462623	t720?		Grpel2	GrpE-like 2, mitochondrial	-1.08	1.2	1.09	1.74	-1.01	1.38	1.26	1.74	AW462623			Grpel2	GrpE-like 2, mitochondrial	1.1	1.01	1.34	-1.18	1.43	-1.01	1.43	AW462623
679	ctsZ	cathepsin Z	1.29	1.06	-1.35	-1.12	1.02	1.15	1.05	-1.35	AW462624			ctsZ	cathepsin Z	1.75	1.13	-1	1.03	-1.03	1.08	-1.22	1.75	AW462624	t15?		ctsZ	cathepsin Z	-1.13	1.12	-1.03	1.12	1.24	1.07	1.24	AW462624
680	AW462631		-1.02	1.01	1.21	1.05	1	1.12	1.14	1.21	AW462631	t720?		AW462631		1.06	1.09	1.05	1.13	-1.01	1.09	1.19	1.19	AW462631	t15? t30? t60? t120? t240? t480? t720?		AW462631		1.03	1.09	1.16	-1.01	1.1	1.09	1.16	AW462631	t30? t60? t120? t240? t480?
681	DNASE1L1	deoxyribonuclease I-like 1 (EC:3.1.21.-)	-1.04	-1.14	-1.2	1.05	-1.01	1.3	1.64	1.64	AW462634			DNASE1L1	deoxyribonuclease I-like 1 (EC:3.1.21.-)	1.11	1.13	-1.02	1.41	1.22	1.37	1.13	1.41	AW462634			DNASE1L1	deoxyribonuclease I-like 1 (EC:3.1.21.-)	-1.03	-1.12	1.1	-1.07	-1.07	-1.05	-1.12	AW462634
682	Wdr45l	Wdr45 like	1.09	-1.25	1.47	-1.34	1.43	1.01	1.39	1.47	AW462636			Wdr45l	Wdr45 like	1.23	-1.18	1.01	-1.07	1.47	1.09	1.33	1.47	AW462636			Wdr45l	Wdr45 like	1.04	1.08	1.74	1.08	1	1.07	1.74	AW462636
683	Agpat5		1.05	-1.01	1.19	-1.36	1.05	1.02	-1.08	-1.36	AW462637			Agpat5		1.01	1.1	-1.11	-1.19	1.3	1.15	-1.01	1.3	AW462637			Agpat5		1.16	1.01	1.39	1.15	-1.14	-1.07	1.39	AW462637	t60?
684	LOC512355		1.36	-1.27	2.65	1.11	-1.1	1.18	1.1	2.65	AW462640			LOC512355		-1.17	-1.05	1.75	1.14	1.32	1.32	1.32	1.75	AW462640			LOC512355		1.64	1.02	1.88	1.3	-1.2	-1.08	1.88	AW462640
685	Bt.8369		1.05	-1.33	-1	1.15	1.21	1.16	1.25	-1.33	AW462648	t720?		Bt.8369		1.12	-1.08	1.13	1.33	1.13	1.21	1.32	1.33	AW462648			Bt.8369		-1.07	-1.13	-1.08	-1.03	1.13	1.04	1.13	AW462648
686	C1orf160	chromosome 1 open reading frame 160	1	-1.15	1.13	-1.07	-1.09	1.04	1.33	1.33	AW462649	t15? t30? t240? t720?		C1orf160	chromosome 1 open reading frame 160	-1.14	1.08	-1.21	-1.01	1.22	1.12	1.2	1.22	AW462649	t15? t240? t480?		C1orf160	chromosome 1 open reading frame 160	1.19	-1.19	1.3	1.03	-1.23	-1.01	1.3	AW462649	t15? t30? t60? t120? t240? t480?
687	B4galt3	UDP-Gal:betaGlcNAc beta 1,4-galactosyltransferase, polypeptide 3	-1.23	1.1	-1.2	-1.04	-1.04	-1.06	-1.18	-1.23	AW462651			B4galt3	UDP-Gal:betaGlcNAc beta 1,4-galactosyltransferase, polypeptide 3	-1.14	1.02	1.09	1.12	-1.04	1.02	1.16	1.16	AW462651	t60? t120? t240? t480?		B4galt3	UDP-Gal:betaGlcNAc beta 1,4-galactosyltransferase, polypeptide 3	1.15	1.23	-1.12	-1	1.12	-1.03	1.23	AW462651	t60? t480?
688	LOC512028		1.04	-1	-1.14	-1.09	1.1	1.13	1.1	-1.14	AW462655	t480? t720?		LOC512028		1.19	1	-1.04	1.07	1.1	1.11	1.09	1.19	AW462655	t15? t60? t120? t240? t480?		LOC512028		-1.1	1.04	-1.03	-1.06	1.04	1.07	-1.1	AW462655	t15? t60? t120? t480?
689	Ngly1	N-glycanase 1	1	1.01	1.14	-1.09	-1.05	1.04	1.1	1.14	AW462662	t720?		Ngly1	N-glycanase 1	-1.05	1.16	-1.21	-1.1	1.15	1.04	1.12	-1.21	AW462662	t15? t240?		Ngly1	N-glycanase 1	1.17	-1.07	1.35	1.11	-1.16	1.05	1.35	AW462662	t60? t120? t480?
690	VKORC1	vitamin K epoxide reductase complex, subunit 1	-1.2	-1.05	1.03	1.06	1	-1.12	-1.01	-1.2	AW462667	t15? t30? t60? t120? t240? t720?		VKORC1	vitamin K epoxide reductase complex, subunit 1	1.03	1.07	1.04	1.01	1.02	-1.03	1.07	1.07	AW462667	t15? t30? t60? t120? t240? t480? t720?		VKORC1	vitamin K epoxide reductase complex, subunit 1	-1.05	-1.03	1.04	1.05	1.06	-1.01	1.06	AW462667	t15? t30? t60? t120? t240? t480?
691	LRRC8E	leucine rich repeat containing 8 family, member E	1.07	1.16	1.41	1.36	-1.03	-1.02	1.08	1.41	AW462669			LRRC8E	leucine rich repeat containing 8 family, member E	1.21	1.04	1.42	1.65	-1.19	-1.01	1.54	1.65	AW462669			LRRC8E	leucine rich repeat containing 8 family, member E	1.1	1.38	1.18	1.11	1.39	1.03	1.39	AW462669
692	Rassf3	Ras association (RalGDS/AF-6) domain family member 3	-1.22	1.24	-1.32	1.12	1.16	1.19	1.13	-1.32	AW462671			Rassf3	Ras association (RalGDS/AF-6) domain family member 3	-1.06	1.15	1.12	1.23	1.01	1.1	1.16	1.23	AW462671			Rassf3	Ras association (RalGDS/AF-6) domain family member 3	1.24	1.25	-1.18	1.09	1.31	1.06	1.31	AW462671
693	ANXA8L1	annexin A8-like 1	1.21	-1.14	2.2	2.07	1.02	-1.28	1.37	2.2	AW462672	t15? t30? t60? t120? t240?		ANXA8L1	annexin A8-like 1	1.06	-1.41	1.43	1.07	1.62	-1.21	1.39	1.62	AW462672	t15? t30? t60? t120? t240?		ANXA8L1	annexin A8-like 1	1.24	1.37	1.63	2.23	-1.25	-1.07	2.23	AW462672	t30? t60? t120? t240?
694	LOC783332		1.26	-1.06	1.34	1.17	1.13	1.27	1.43	1.43	AW462681			LOC783332		1.13	1.04	1.34	1.62	-1.03	1.17	1.64	1.64	AW462681			LOC783332		1.25	1.09	1.12	-1.08	1.36	1.15	1.36	AW462681
695	TNIK	we84c01x1 Soares_NFL_T_GBC_S1 cDNA clone IMAGE:2347776 3' similar to TR:O60298 O60298 KIAA0551 PROTEIN ;	1.01	-1.05	-1.01	-1.42	-1.01	1.23	-1.02	-1.42	AW462683	t15? t30? t60? t240? t480? t720?		TNIK	we84c01x1 Soares_NFL_T_GBC_S1 cDNA clone IMAGE:2347776 3' similar to TR:O60298 O60298 KIAA0551 PROTEIN ;	1.1	1.04	-1.07	-1.46	-1.14	1.09	-1.16	-1.46	AW462683	t15? t120? t240? t480? t720?		TNIK	we84c01x1 Soares_NFL_T_GBC_S1 cDNA clone IMAGE:2347776 3' similar to TR:O60298 O60298 KIAA0551 PROTEIN ;	1.08	-1.08	1.14	1.16	1.19	1.15	1.19	AW462683	t60? t120? t480?
696	IFRD2	interferon-related developmental regulator 2	1	1.01	1.36	1.15	1.09	-1.05	1.05	1.36	AW462699			IFRD2	interferon-related developmental regulator 2	-1	-1.06	1.15	1.32	1.05	-1.06	1.34	1.34	AW462699			IFRD2	interferon-related developmental regulator 2	1.18	1.19	1.33	1.07	1.19	1.06	1.33	AW462699
697	CPNE3	copine III	-1.07	-1.04	-1.19	-1.24	1.14	1.06	1.26	1.26	AW462705	t15? t30? t60?		CPNE3	copine III	1.17	1.08	-1.12	-1.12	1.24	-1.01	1.03	1.24	AW462705			CPNE3	copine III	-1.1	-1.02	1.12	1.15	-1.02	1.11	1.15	AW462705
698	Mobk1b	MOB1, Mps One Binder kinase activator-like 1B (yeast)	-1.2	1.18	1.3	-1.01	1.08	1.44	-1	1.44	AW462706			Mobk1b	MOB1, Mps One Binder kinase activator-like 1B (yeast)	-1.13	1.27	-1.03	1.19	1.12	1.25	1.08	1.27	AW462706			Mobk1b	MOB1, Mps One Binder kinase activator-like 1B (yeast)	1.09	1.08	1.58	1.18	1.12	1.15	1.58	AW462706
699	IL15RA	interleukin 15 receptor, alpha	1.06	1.05	-1.02	1.19	1.1	1.32	1.88	1.88	AW462714	t720?		IL15RA	interleukin 15 receptor, alpha	1.07	-1	1.1	1.44	-1.03	1.19	1.35	1.44	AW462714	t15? t60? t120? t240? t480?		IL15RA	interleukin 15 receptor, alpha	1.09	1.18	-1.01	-1.05	1.23	1.17	1.23	AW462714	t60? t120?
700	IDH1	isocitrate dehydrogenase 1 (NADP+), soluble	-1.03	1.04	-1	-1.21	-1.75	-1.49	-1.64	-1.75	AW462719	t15? t30? t60? t240?		IDH1	isocitrate dehydrogenase 1 (NADP+), soluble	-1.08	1.43	1.07	-1.28	-1.05	-1.31	-1.18	1.43	AW462719	t60?		IDH1	isocitrate dehydrogenase 1 (NADP+), soluble	1.13	-1.22	1.04	1.23	-1.44	-1.12	-1.44	AW462719	t60? t480?
701	Incenp	inner centromere protein	-1	-1.13	-1.45	-1.88	1.3	-1.11	-1.11	-1.88	AW462720			Incenp	inner centromere protein	-1.01	1.41	1.01	-1.79	-1.04	-1.01	-1.04	-1.79	AW462720	t240?		Incenp	inner centromere protein	1.36	-1.53	-1.08	1.22	1.46	-1.07	-1.53	AW462720
702	FADD	Fas (TNFRSF6)-associated via death domain	-1.05	-1.28	1.89	1	-1.31	-1.03	1.15	1.89	AW462721	t15? t30? t60? t120?		FADD	Fas (TNFRSF6)-associated via death domain	-1.46	-1.03	1.36	-1.04	1.01	1.15	1.2	-1.46	AW462721	t120?		FADD	Fas (TNFRSF6)-associated via death domain	1.6	-1.15	1.44	1.05	-1.13	-1.08	1.6	AW462721	t120? t480?
703	PIN1	peptidylprolyl cis/trans isomerase, NIMA-interacting 1	1.07	1.09	1.15	-1.39	1.05	1.05	-1.23	-1.39	AW462723			PIN1	peptidylprolyl cis/trans isomerase, NIMA-interacting 1	1.07	1.04	-1.1	-1.05	1.54	1.12	1.18	1.54	AW462723			PIN1	peptidylprolyl cis/trans isomerase, NIMA-interacting 1	1.14	1.24	1.44	-1.02	-1.29	1.03	1.44	AW462723
704	Bt.22747		1.05	1.1	-1.36	-1.05	1.05	-1.2	-1.75	-1.75	AW462726	t15? t240?		Bt.22747		1.29	1.12	1.21	-1.18	1.15	-1.32	-1.37	-1.37	AW462726			Bt.22747		-1.12	1.11	-1.27	1.34	1.08	1.04	1.34	AW462726	t480?
705	CSNK1G3	casein kinase 1, gamma 3	-1	1.15	-1.52	-1.11	1.26	1.05	-2.19	-2.19	AW462731			CSNK1G3	casein kinase 1, gamma 3	-1.04	1.36	1.01	1.12	1.35	-1.01	-1.41	-1.41	AW462731			CSNK1G3	casein kinase 1, gamma 3	1.17	1	-1.2	1.04	1.14	1.12	-1.2	AW462731
706	ZNF333		-1.12	1.63	-2.17	-1.1	1.09	-1.1	-1.36	-2.17	AW462735	t30?		ZNF333		-1.04	1.81	-1.2	-1.2	1.03	-1.49	-1.47	1.81	AW462735	t720?		ZNF333		1.1	-1.04	-1.58	1.34	1.29	1.33	-1.58	AW462735
707	RBM39		-1.33	1.06	-1.3	1.06	-1.02	1.18	-1.29	-1.33	AW462759			RBM39		-1.05	1.03	1.14	1.31	1.02	1.22	-1.09	1.31	AW462759			RBM39		-1.04	1.17	-1.12	1.14	1.19	-1	1.19	AW462759
708	Bt.13355		1.03	-1.1	-1.05	1.31	-1.15	-1.18	-1.15	1.31	AW462764			Bt.13355		1.08	-1.05	1.21	1.31	-1.02	-1.1	1.43	1.43	AW462764			Bt.13355		1.11	1.13	-1.11	1.22	1.05	1.02	1.22	AW462764
709	Pcyox1l		-1.08	-1.11	1.41	-1	1.09	-1.09	1.05	1.41	AW462770			Pcyox1l		1.05	-1.53	1.12	1.1	-1.01	1.03	1.24	-1.53	AW462770	t30? t60? t120? t480?		Pcyox1l		1.02	1.38	1.32	1.03	1.24	1	1.38	AW462770	t30? t60? t480?
710	MMACHC	methylmalonic aciduria (cobalamin deficiency) cblC type, with homocystinuria	1.21	1.22	1.49	1.09	-1.04	1.13	1.32	1.49	AW462778			MMACHC	methylmalonic aciduria (cobalamin deficiency) cblC type, with homocystinuria	-1.01	1.07	1.03	-1.06	1.16	1.12	1.11	1.16	AW462778			MMACHC	methylmalonic aciduria (cobalamin deficiency) cblC type, with homocystinuria	1.3	1.27	1.48	1.28	-1.1	1.04	1.48	AW462778	t60? t120?
711	DKFZp434K1815		1.03	-1.12	1.07	1.03	-1	-1.02	-1.04	-1.12	AW462782			DKFZp434K1815		1.13	-1.2	1.14	1.17	-1.15	1.02	1.19	-1.2	AW462782			DKFZp434K1815		1.03	1.18	1.09	1.07	1.31	1.02	1.31	AW462782
712	AW462784		1.09	1.22	-1.12	1.21	-1	-1.22	-1.08	1.22	AW462784	t15?		AW462784		1.06	1.4	-1.08	1.33	1.01	-1.11	1.68	1.68	AW462784			AW462784		1.15	1.06	-1.01	1.15	1.14	-1.05	1.15	AW462784
713	Crebzf		1	1.1	-1.15	1.09	-1.07	1.08	-1.04	-1.15	AW462786			Crebzf		1.04	1.04	1.15	1.08	-1.15	1.07	1.28	1.28	AW462786	t15? t240?		Crebzf		1.02	1.16	-1.13	1.16	1.23	1.04	1.23	AW462786	t60? t480?
714	Mrpl32	mitochondrial ribosomal protein L32	-1.05	-1.14	1.39	1.23	-1.16	1.03	1.66	1.66	AW462792			Mrpl32	mitochondrial ribosomal protein L32	1.12	-1.05	1.16	1.34	-1.02	1.08	1.77	1.77	AW462792			Mrpl32	mitochondrial ribosomal protein L32	1.06	1.04	1.46	1.16	1.09	-1.02	1.46	AW462792	t15?
715	CCNA1	cyclin A1	1.42	-1.05	1.12	-1.06	-1.08	-1.02	-1.04	1.42	AW462793	t15?		CCNA1	cyclin A1	1.29	-1.08	-1.05	1.12	-1.01	1.15	1.2	1.29	AW462793			CCNA1	cyclin A1	1.23	1.08	1.19	1.01	1.06	-1.04	1.23	AW462793
716	Mrpl18	mitochondrial ribosomal protein L18	-1.02	-1.01	1.29	1.18	1.11	-1.13	-1.35	-1.35	AW462794			Mrpl18	mitochondrial ribosomal protein L18	1.12	-1.09	1.21	1.25	-1.13	1.01	-1.12	1.25	AW462794			Mrpl18	mitochondrial ribosomal protein L18	1.02	1.32	1.28	1.24	1.51	-1.08	1.51	AW462794
717	PROS1	protein S (alpha)	1.25	-1.07	1.03	1.1	-1.13	1.04	1.05	1.25	AW462800	t480? t720?		PROS1	protein S (alpha)	1.5	1.1	1.06	1.29	-1.08	1.23	1.04	1.5	AW462800	t15? t60? t120? t480? t720?		PROS1	protein S (alpha)	-1.06	-1.09	-1	-1.06	1.11	-1.05	1.11	AW462800	t60? t120? t480?
718	C9orf25		1.14	-1.1	1.4	1.12	-1.01	-1.19	1.04	1.4	AW462803			C9orf25		1	-1.2	1.28	1.11	-1.04	1.1	1.59	1.59	AW462803			C9orf25		1.26	1.28	1.21	1.3	1.19	-1.21	1.3	AW462803
719	CD9	CD9 molecule	1.15	1.01	1.15	1.03	-1.05	1.06	1.02	1.15	AW462815	t720?		CD9	CD9 molecule	-1.04	1.02	1.02	1.03	1.04	1.08	1.12	1.12	AW462815	t15? t60? t120? t240? t480?		CD9	CD9 molecule	1.23	1.05	1.14	1.06	-1.01	1.01	1.23	AW462815	t60? t120? t480?
720	Liph		1.08	-1.09	1	-1.23	1.16	1.3	1.03	1.3	AW462817	t240?		Liph		-1.04	1.05	1.06	1.14	1.47	1.3	1.64	1.64	AW462817	t60? t120? t240?		Liph		1.21	-1.06	1.03	-1.21	-1.23	1.06	-1.23	AW462817	t60? t120?
721	Mrps24	mitochondrial ribosomal protein S24	1.17	-1.48	1.39	-1.36	1.24	1.32	-1.01	-1.48	AW462818			Mrps24	mitochondrial ribosomal protein S24	1.18	-1.16	1.07	-1.12	1.42	1.27	1.4	1.42	AW462818			Mrps24	mitochondrial ribosomal protein S24	1.28	-1.03	1.62	1.1	1.04	1.08	1.62	AW462818
722	LOC524274		1.07	-1.02	-1.01	1.12	1.11	-1.05	1.16	1.16	AW462819			LOC524274		1.03	-1.03	1.16	1.46	1.07	1.06	1.68	1.68	AW462819			LOC524274		1.14	1.27	1.04	1.01	1.24	-1	1.27	AW462819
723	Hmg20b	high mobility group 20 B	1.12	1.21	-1.26	1	1.33	1.8	2.02	2.02	AW462824	t15?		Hmg20b	high mobility group 20 B	1.53	1.33	1.22	1.05	-1.02	1.28	2.42	2.42	AW462824			Hmg20b	high mobility group 20 B	-1.45	1.07	-1.15	1.19	1.71	1.3	1.71	AW462824
724	LOC614872		-1.07	1.16	1.05	-1.16	-1.07	-1.03	-1.06	1.16	AW462831	t15? t30? t60? t240? t480? t720?		LOC614872		-1.12	1.25	-1.09	-1.17	-1.08	1.01	1.01	1.25	AW462831	t15? t30? t60? t240? t480? t720?		LOC614872		-1	1.02	1.1	1.08	1.11	-1.01	1.11	AW462831	t15? t60? t120? t240? t480?
725	KIAA1467		1.11	-1.15	1.05	-1.29	-1.02	1.04	1.11	-1.29	AW462839			KIAA1467		-1.08	-1.03	-1.08	-1.29	1.17	1.03	1.1	-1.29	AW462839			KIAA1467		1.38	-1.04	1.21	1.14	-1.08	1.04	1.38	AW462839
726	Cdc42se1	CDC42 small effector 1	-1.23	1.06	-1.34	1.01	1.41	1.17	1.01	1.41	AW462842			Cdc42se1	CDC42 small effector 1	-1.05	1.08	1.02	1.21	1.2	1.07	1.06	1.21	AW462842			Cdc42se1	CDC42 small effector 1	1.04	1.14	-1.04	1.11	1.31	1.11	1.31	AW462842
727	SP100	SP100 nuclear antigen	1.4	1.02	-1.16	-1.05	1.41	1.24	-1.16	1.41	AW462848	t15?		SP100	SP100 nuclear antigen	2.14	1.36	1.07	1.05	1.26	-1.08	-1.4	2.14	AW462848	t15?		SP100	SP100 nuclear antigen	-1.34	-1.25	-1.02	1.11	1.21	1.41	1.41	AW462848
728	GBA	glucosidase, beta; acid (includes glucosylceramidase)	1.2	-1.02	1.03	1.14	-1.06	-1.15	1.06	1.2	AW462861			GBA	glucosidase, beta; acid (includes glucosylceramidase)	1.07	-1.07	1.17	1.07	-1.02	-1.1	1.37	1.37	AW462861			GBA	glucosidase, beta; acid (includes glucosylceramidase)	1.12	1.16	-1.03	1.21	1.12	-1.02	1.21	AW462861
729	KIAA0494		-1.18	1.21	-1.14	-1.23	1.12	-1.07	-1.01	-1.23	AW462871	t720?		KIAA0494		1.04	1.51	1.05	-1.31	1.05	-1.08	-1.18	1.51	AW462871	t15? t60? t240? t480? t720?		KIAA0494		-1.05	-1.18	-1.05	1.25	1.12	1.01	1.25	AW462871	t60? t120? t480?
730	Wwc1	WW, C2 and coiled-coil domain containing 1	1.51	-1.37	1.98	1.25	-1.47	-1.15	1.53	1.98	AW462873	t15? t60?		Wwc1	WW, C2 and coiled-coil domain containing 1	-1.35	-1.24	1.35	1.14	1.14	1.15	1.69	1.69	AW462873			Wwc1	WW, C2 and coiled-coil domain containing 1	1.98	1.12	1.64	1.27	-1.45	-1.25	1.98	AW462873
731	Prpf31	PRP31 pre-mRNA processing factor 31 homolog (yeast)	-1.17	-1.05	-1.03	-1.16	-1.09	1.11	1.42	1.42	AW462877			Prpf31	PRP31 pre-mRNA processing factor 31 homolog (yeast)	-1.08	1.15	1.09	-1.18	1.07	1	1.12	-1.18	AW462877	t120? t240? t480? t720?		Prpf31	PRP31 pre-mRNA processing factor 31 homolog (yeast)	1.04	-1.12	1.03	1.21	-1.13	1.13	1.21	AW462877
732	STK35	serine/threonine kinase 35	-1.22	1.09	1.02	-1.43	-1	1.06	1.13	-1.43	AW462885	t15?		STK35	serine/threonine kinase 35	-1.58	1.62	1.04	-1.54	1.03	1.04	1.02	1.62	AW462885			STK35	serine/threonine kinase 35	1.32	-1.28	1.13	1.31	1.04	1.15	1.32	AW462885
733	Zfp64	zinc finger protein 64	-1.08	1.09	-1.49	-1.51	1.46	1.19	-1.15	-1.51	AW462887			Zfp64	zinc finger protein 64	1.1	1.76	-1.06	-1.78	1.24	1.16	-1.18	-1.78	AW462887			Zfp64	zinc finger protein 64	1.1	-1.38	-1.15	1.39	1.27	1.04	1.39	AW462887
734	CYP11A1	cytochrome P450, family 11, subfamily A, polypeptide 1	1.1	1	-1.02	1.22	-1.11	1.03	1.15	1.22	AW462892	t720?		CYP11A1	cytochrome P450, family 11, subfamily A, polypeptide 1	1.24	1.02	-1.02	1.19	1.02	1.04	1.41	1.41	AW462892	t15? t480?		CYP11A1	cytochrome P450, family 11, subfamily A, polypeptide 1	1.02	1.05	1.01	1.08	1.05	1.06	1.08	AW462892	t60? t120? t480?
735	CRIPT		-1.25	-1.05	-1.42	-1.13	1.11	1.03	-1.38	-1.42	AW462895			CRIPT		-1.05	1.11	1	-1.04	1.02	-1	-1.71	-1.71	AW462895			CRIPT		-1.19	-1.11	-1.31	1.1	1.14	1.03	-1.31	AW462895	t480?
736	NAPA	N-ethylmaleimide-sensitive factor attachment protein, alpha	1.35	-1.09	1.04	1.07	-1.01	-1.19	-1.09	1.35	AW462899			NAPA	N-ethylmaleimide-sensitive factor attachment protein, alpha	1.19	-1.08	1.47	1.3	-1.02	1.04	1.37	1.47	AW462899			NAPA	N-ethylmaleimide-sensitive factor attachment protein, alpha	1.56	1.22	-1.12	1.1	1.24	-1.17	1.56	AW462899
737	WNT4	wingless-type MMTV integration site family, member 4	1.03	1.06	1.12	-1	-1.06	-1.11	1.19	1.19	AW462911	t720?		WNT4	wingless-type MMTV integration site family, member 4	1.05	-1.01	1.12	-1.04	-1.04	-1	1.25	1.25	AW462911	t15? t60? t120? t240? t480? t720?		WNT4	wingless-type MMTV integration site family, member 4	1.13	1.12	1.04	1.06	1.07	-1.04	1.13	AW462911	t15? t30? t60? t120? t240? t480?
738	RBM9	RNA binding motif protein 9	1.07	-1.14	1.28	-1.38	1.1	1.05	-1.74	-1.74	AW462913			RBM9	RNA binding motif protein 9	1.17	1.18	1.36	-1.28	1.21	1.05	-1.37	-1.37	AW462913			RBM9	RNA binding motif protein 9	-1.04	-1.1	1.13	1.24	1.09	1.11	1.24	AW462913
739	TCIRG1	T-cell, immune regulator 1, ATPase, H+ transporting, lysosomal V0 subunit A3	1.4	1.03	1.01	1.09	1.03	1.19	1.28	1.4	AW462950			TCIRG1	T-cell, immune regulator 1, ATPase, H+ transporting, lysosomal V0 subunit A3	1.26	1.11	1.15	1.49	1.18	1.16	1.63	1.63	AW462950			TCIRG1	T-cell, immune regulator 1, ATPase, H+ transporting, lysosomal V0 subunit A3	1.25	1.14	1.09	-1.03	1.06	1.07	1.25	AW462950
740	Ptp4a2	protein tyrosine phosphatase 4a2	-1.09	1.16	-1.26	1.04	1.3	1.12	-1.21	1.3	AW462951			Ptp4a2	protein tyrosine phosphatase 4a2	1.05	1.24	1.01	1.11	1.25	1.16	-1.17	1.25	AW462951			Ptp4a2	protein tyrosine phosphatase 4a2	-1.04	1.05	1.02	1.27	1.22	-1.05	1.27	AW462951
741	Mospd1	motile sperm domain containing 1	1.2	1.13	1.2	-1.04	-1.01	1.03	1.09	1.2	AW462955			Mospd1	motile sperm domain containing 1	-1.13	-1.01	-1.12	1.02	1.14	1.08	1.18	1.18	AW462955			Mospd1	motile sperm domain containing 1	1.39	1.25	1.28	1.07	-1.05	-1	1.39	AW462955	t60? t120?
742	BNIP3	BCL2/adenovirus E1B 19kDa interacting protein 3	1.22	-1.03	1.28	-1.24	-1	-1.27	1.28	1.28	AW462956	t15? t30? t60? t240?		BNIP3	BCL2/adenovirus E1B 19kDa interacting protein 3	1.16	1.23	1.27	-1.43	1.09	-1.28	-1.08	-1.43	AW462956	t60? t120?		BNIP3	BCL2/adenovirus E1B 19kDa interacting protein 3	1.13	-1.13	1.17	1.27	1.04	-1.01	1.27	AW462956	t120?
743	CD9	CD9 molecule	-1.05	1.05	-1.07	-1.22	1.31	1.29	-1.1	1.31	AW462962			CD9	CD9 molecule	1.46	1.16	-1.1	-1.12	1.42	1.27	-1	1.46	AW462962			CD9	CD9 molecule	-1.29	1.09	1.25	1.23	1.1	1.09	-1.29	AW462962
744	ROD1	ROD1 regulator of differentiation 1 (S. pombe)	-1.02	1.12	-1.2	1.24	1.05	1.3	1.35	1.35	AW462969			ROD1	ROD1 regulator of differentiation 1 (S. pombe)	1.17	1.09	1.27	1.38	-1.01	1.12	1.05	1.38	AW462969			ROD1	ROD1 regulator of differentiation 1 (S. pombe)	1.04	1.21	-1.14	1.21	1.34	1.13	1.34	AW462969
745	Ace	angiotensin I converting enzyme (peptidyl-dipeptidase A) 1	1.18	-1.01	-1.5	-1.68	1.31	-1.03	-1.32	-1.68	AW462972			Ace	angiotensin I converting enzyme (peptidyl-dipeptidase A) 1	1.38	1.88	-1.06	-1.81	1.29	1.01	-1.4	1.88	AW462972			Ace	angiotensin I converting enzyme (peptidyl-dipeptidase A) 1	1.05	-1.55	-1.14	1.44	1.2	-1	-1.55	AW462972
746	Pecam1	platelet/endothelial cell adhesion molecule 1	-1.09	1.06	-1.16	-1.01	-1.13	1.04	-1.13	-1.16	AW462978			Pecam1	platelet/endothelial cell adhesion molecule 1	1.05	1.13	1.09	1.07	-1.09	1.06	-1.02	1.13	AW462978	t15? t60? t240? t480?		Pecam1	platelet/endothelial cell adhesion molecule 1	1.02	1.05	-1.19	-1.01	1.07	1.04	-1.19	AW462978	t60? t120? t240? t480?
747	ZUBR1		1.12	1	1.42	1.09	-1.05	1.29	1.01	1.42	AW462980			ZUBR1		1.03	-1.09	1.21	1.18	1.11	1.24	1.16	1.24	AW462980			ZUBR1		1.33	1.18	1.39	1.13	-1.03	1.04	1.39	AW462980
748	Pgls	6-phosphogluconolactonase	-1.09	1.02	-1.5	-1.11	1.36	1.19	-1.3	-1.5	AW462984	t15? t30? t480?		Pgls	6-phosphogluconolactonase	1.42	1.37	1.05	-1.14	1.1	1.07	-1.07	1.42	AW462984			Pgls	6-phosphogluconolactonase	-1.24	-1.17	-1.23	1.24	1.34	1.02	1.34	AW462984
749	Chmp7		1.11	1.01	1.02	1.07	-1.05	-1.13	-1.07	-1.13	AW462990			Chmp7		1.21	1.1	1.09	1.08	-1.05	-1.04	1.43	1.43	AW462990	t15? t60? t120?		Chmp7		1.14	-1.05	-1.01	1.06	1.15	-1.06	1.15	AW462990	t60? t120? t480?
750	Dynll1		-1.27	-1.16	-1.31	-1.21	-1.17	-1.21	-1.37	-1.37	AW462996	t15? t60?		Dynll1		1.17	-1.06	1.06	-1.19	1.11	-1.05	-1.12	-1.19	AW462996	t60?		Dynll1		-1.13	1.02	-1.15	1.22	-1.15	-1.11	1.22	AW462996	t60?
751	Tscot		-1.03	-1.16	1.21	-1.1	1.18	1.11	1.18	1.21	AW463001			Tscot		1.2	-1.17	1.06	1.2	1.05	1.16	1.08	1.2	AW463001	t720?		Tscot		-1.03	1.07	1.31	-1.12	1.26	1.04	1.31	AW463001
752	P117		1.01	-1	-1.06	-1.01	-1.12	-1.15	-1.5	-1.5	AW463002			P117		1.08	-1.02	1.41	1.13	1.03	-1.03	-1.19	1.41	AW463002			P117		1.28	1.23	-1.11	1.14	1.07	-1.1	1.28	AW463002
753	NLRP13	NLR family, pyrin domain containing 13	1.24	1.04	-1.27	1.09	1.14	1.12	-1.55	-1.55	AW463004			NLRP13	NLR family, pyrin domain containing 13	1.41	1.28	1.04	1.09	-1.07	1.01	-1.21	1.41	AW463004			NLRP13	NLR family, pyrin domain containing 13	-1.03	-1.02	-1.09	1.18	1.44	1.13	1.44	AW463004
754	CCDC12		1.1	-1.19	1.19	-1.11	-1.43	1	1.46	1.46	AW463013			CCDC12		-1.39	1.08	-1.2	-1.25	1.12	1.1	1.28	-1.39	AW463013			CCDC12		1.67	-1.1	1.51	1.25	-1.43	-1.04	1.67	AW463013	t120?
755	Bt.65105		1.25	1.09	-1.11	-1.1	1.09	1.08	-1.3	-1.3	AW463015	t15?		Bt.65105		1.62	1.07	1.01	-1.07	1.08	1.05	-1.12	1.62	AW463015	t15? t480?		Bt.65105		-1.05	1.02	-1.07	1.12	1.14	1.09	1.14	AW463015	t60? t480?
756	Triobp	TRIO and F-actin binding protein	-1.1	-1.07	1.06	-1	-1.06	1.09	1.34	1.34	AW463030			Triobp	TRIO and F-actin binding protein	-1.2	-1	1.14	1.32	1.08	1.14	-1.05	1.32	AW463030	t720?		Triobp	TRIO and F-actin binding protein	1.23	1.07	1.09	-1.13	-1.04	-1.05	1.23	AW463030	t60?
757	STK10	serine/threonine kinase 10	1.24	-1.18	-1.1	1.26	-1.08	1.48	1.62	1.62	AW463031			STK10	serine/threonine kinase 10	1.26	-1.09	1.12	1.7	-1.05	1.22	1.63	1.7	AW463031			STK10	serine/threonine kinase 10	1.09	1.1	-1.18	-1.06	1.15	1.27	1.27	AW463031
758	Ecsit		1.16	1.07	1.1	-1.1	-1.06	-1.09	-1.04	1.16	AW463032	t720?		Ecsit		-1	1.17	-1.11	-1.11	1.01	1.02	1.15	1.17	AW463032	t15? t120? t240? t480?		Ecsit		1.11	-1.03	1.27	1.12	1.01	-1.1	1.27	AW463032	t15? t60? t120? t480?
759	AKAP12	A kinase (PRKA) anchor protein (gravin) 12	1.14	-1.11	-1	-1.03	-1.12	-1.13	1.07	1.14	AW463034			AKAP12	A kinase (PRKA) anchor protein (gravin) 12	1.1	1	1.32	-1.04	1.04	-1.01	1.3	1.32	AW463034			AKAP12	A kinase (PRKA) anchor protein (gravin) 12	1.17	1	-1.13	1.21	1.01	-1.1	1.21	AW463034	t60? t480?
760	AW463041		1.05	1.1	1.1	1.08	1.01	1.08	1.05	1.1	AW463041	t60? t720?		AW463041		-1.02	1.07	1.07	1.12	-1.01	1.04	1.05	1.12	AW463041	t15? t30? t60? t120? t240? t480? t720?		AW463041		1.18	1.19	1.04	1.03	1.12	1.09	1.19	AW463041	t30? t60? t120? t240? t480?
761	KIAA1704		-1.09	-1.16	1.14	1.26	-1.27	-1.22	1.06	-1.27	AW463046	t15? t30? t60? t240?		KIAA1704		1.12	-1.33	1.41	1.08	1.15	-1.15	1.33	1.41	AW463046			KIAA1704		-1.11	1.22	-1.05	1.42	-1.21	-1.12	1.42	AW463046
762	LOC553158		-1.09	1.02	1.04	-1	-1.16	-1.18	1.3	1.3	AW463054	t240? t720?		LOC553158		-1.11	-1.01	-1.07	1.08	-1.05	-1.05	1.26	1.26	AW463054	t15? t120? t720?		LOC553158		1.16	1.01	1.09	-1.1	-1.01	-1	1.16	AW463054	t15? t30? t60? t120? t240? t480?
763	C17orf85		1.1	-1.08	-1.11	-1.38	1.36	1.16	-1.42	-1.42	AW463065			C17orf85		1.17	1.14	1.04	-1.04	1.57	1.2	-1.1	1.57	AW463065			C17orf85		1.01	-1.01	1.07	1.01	1.05	-1.01	1.07	AW463065
764	PPP2R2A	protein phosphatase 2 (formerly 2A), regulatory subunit B, alpha isoform	-1.33	1.06	-1.21	1.01	1.01	1.19	1.38	1.38	AW463067			PPP2R2A	protein phosphatase 2 (formerly 2A), regulatory subunit B, alpha isoform	-1.09	1.02	-1	1.29	1.06	1.28	1.13	1.29	AW463067			PPP2R2A	protein phosphatase 2 (formerly 2A), regulatory subunit B, alpha isoform	-1.07	1.19	1.01	-1.04	1.07	-1.07	1.19	AW463067
765	C1orf61	chromosome 1 open reading frame 61	1.07	-1.12	1.32	1.07	-1.03	-1.15	1.1	1.32	AW463075	t15? t30? t60? t120? t240? t480?		C1orf61	chromosome 1 open reading frame 61	1.09	-1.47	1.15	1.03	-1.01	-1.1	1.16	-1.47	AW463075	t15? t30? t60? t120? t240? t480? t720?		C1orf61	chromosome 1 open reading frame 61	1.09	1.52	1.26	1.08	1.13	1.02	1.52	AW463075	t15? t30? t60? t120? t240? t480?
766	COQ2	coenzyme Q2 homolog, prenyltransferase (yeast) (EC:2.5.1.-)	1.01	-1.01	1.36	-1.2	1.16	1.3	-1.34	1.36	AW463087			COQ2	coenzyme Q2 homolog, prenyltransferase (yeast) (EC:2.5.1.-)	-1.01	-1.08	1.12	1.3	1.33	1.36	1.18	1.36	AW463087			COQ2	coenzyme Q2 homolog, prenyltransferase (yeast) (EC:2.5.1.-)	1.17	1.31	1.56	-1.12	1.01	1.03	1.56	AW463087
767	Mta3	metastasis associated 3	1.01	1.23	-1.7	-1.16	1.16	1.09	-1.65	-1.7	AW463092			Mta3	metastasis associated 3	1.17	1.44	1.01	-1.01	-1.04	1.01	-1.27	1.44	AW463092			Mta3	metastasis associated 3	-1.03	-1.05	-1.36	1.1	1.36	1.07	1.36	AW463092
768	BRAF	v-raf murine sarcoma viral oncogene homolog B1	-1.03	1.03	1.09	-1.12	1.15	-1.04	1.01	1.15	AW463094			BRAF	v-raf murine sarcoma viral oncogene homolog B1	-1.05	1.1	1.01	1.05	1.04	1.08	1.18	1.18	AW463094	t60? t120? t240? t480?		BRAF	v-raf murine sarcoma viral oncogene homolog B1	1.13	1.01	1.13	-1.03	1.13	-1.04	1.13	AW463094	t60? t120? t480?
769	C3orf60		-1.09	-1.2	1.15	1.04	-1.12	-1.1	-1.09	-1.2	AW463102	t30?		C3orf60		-1.11	-1.21	1.34	1.06	1.01	-1.02	1.07	1.34	AW463102	t120?		C3orf60		1.16	1.23	-1	1.09	1.01	-1.07	1.23	AW463102	t120? t480?
770	C13orf34	chromosome 13 open reading frame 34	1.1	1.05	1.14	-1.09	-1.09	-1.16	-1.04	-1.16	AW463110	t240?		C13orf34	chromosome 13 open reading frame 34	1.02	1.06	1.16	-1.01	-1.05	-1.04	1.08	1.16	AW463110	t15? t60? t120? t240? t480?		C13orf34	chromosome 13 open reading frame 34	1.08	1.07	-1.01	-1.03	1.05	-1.1	-1.1	AW463110	t60? t120? t480?
771	TRIM71		1.03	-1.05	-1.05	1.05	-1.26	-1.22	-1.03	-1.26	AW463111	t15? t240?		TRIM71		-1.3	1.07	-1.46	-1.02	1.01	-1.07	1.31	-1.46	AW463111	t15? t60?		TRIM71		1.35	-1.05	1.38	1.17	-1.13	-1.09	1.38	AW463111	t480?
772	LOC512064		1.11	-1.07	1.15	1.34	-1.17	-1.03	1.06	1.34	AW463115	t120?		LOC512064		1.07	1.05	1.05	1.38	1.03	-1.04	1.47	1.47	AW463115	t720?		LOC512064		1.06	-1.03	1.21	1.11	-1.04	1.06	1.21	AW463115
773	PDF		1.36	-1.18	1.04	1.28	-1.31	1.05	1.18	1.36	AW463116			PDF		1.44	-1.09	1.09	1.33	-1.19	1.05	1.53	1.53	AW463116			PDF		1.01	1.06	1.09	1.18	1.04	1.02	1.18	AW463116
774	PABPC4	poly(A) binding protein, cytoplasmic 4 (inducible form)	-1.07	-1.14	1.26	-1.07	-1.12	1.02	1.44	1.44	AW463119			PABPC4	poly(A) binding protein, cytoplasmic 4 (inducible form)	-1.34	1.16	-1.04	-1.26	1.33	1.03	1.59	1.59	AW463119			PABPC4	poly(A) binding protein, cytoplasmic 4 (inducible form)	1.36	-1.05	1.44	1.38	-1.4	1.03	1.44	AW463119
775	NADSYN1	NAD synthetase 1	1.31	-1.12	1.25	1.21	-1.29	1.11	1.25	1.31	AW463127			NADSYN1	NAD synthetase 1	-1.13	1.28	1.26	1.35	1.03	1.09	1.64	1.64	AW463127			NADSYN1	NAD synthetase 1	1.46	-1.21	1.07	1.11	-1.13	1.05	1.46	AW463127
776	LOC514613		1.12	1.04	-1.08	-1.23	1.44	1.47	2.09	2.09	AW463136			LOC514613		1.52	1.24	1.02	-1.06	1.09	1.37	1.05	1.52	AW463136	t480? t720?		LOC514613		-1.19	-1.1	1.07	1.14	1.38	1.12	1.38	AW463136	t480?
777	Wdr17	WD repeat domain 17	-1.2	-1.18	-1	-1.06	-1.13	-1.1	1.41	1.41	AW463139	t240? t480? t720?		Wdr17	WD repeat domain 17	1.1	-1.06	1.09	1.09	1.02	1.02	1.37	1.37	AW463139	t15? t30? t60? t120? t720?		Wdr17	WD repeat domain 17	-1.06	-1.02	-1.12	-1.05	-1.03	-1.02	-1.12	AW463139	t15? t30? t60? t120? t240? t480?
778	PRKCZ	protein kinase C, zeta	1.19	1.05	-1.04	-1.22	-1.06	-1.09	-1.01	-1.22	AW463157			PRKCZ	protein kinase C, zeta	1.01	1.05	-1.2	-1.28	1.26	-1.03	1.1	-1.28	AW463157			PRKCZ	protein kinase C, zeta	1.35	1.08	1.28	1.33	-1.24	-1.02	1.35	AW463157	t60?
779	MIF4GD	MIF4G domain containing	1.09	-1.21	1.16	1.02	-1.07	1.05	-1.05	-1.21	AW463169			MIF4GD	MIF4G domain containing	1.1	1.01	1.15	1.05	1.11	1.06	-1.03	1.15	AW463169			MIF4GD	MIF4G domain containing	1.04	-1.07	1.14	1.12	-1.07	-1.01	1.14	AW463169	t60? t120?
780	SLC2A3	solute carrier family 2 (facilitated glucose transporter), member 3	-1.26	1.09	1.05	1.11	1.79	2.17	3.88	3.88	AW463170	t15? t30? t60? t120? t240? t720?		SLC2A3	solute carrier family 2 (facilitated glucose transporter), member 3	1.1	1.27	1.08	1.03	1.45	-1.01	1.14	1.45	AW463170	t15? t30? t60? t120? t240? t720?		SLC2A3	solute carrier family 2 (facilitated glucose transporter), member 3	-1.23	-1.04	1.08	1.24	1.29	1.92	1.92	AW463170	t15? t60? t480?
781	APTX	aprataxin	1.06	-1.09	1.01	-1.24	-1.04	1.19	1.4	1.4	AW463171	t720?		APTX	aprataxin	-1.08	1.1	-1.12	-1.26	1.11	1.17	1.43	1.43	AW463171			APTX	aprataxin	1.24	-1.04	1.25	1.19	-1.08	1.07	1.25	AW463171	t60?
782	HK1	hexokinase 1	-1.08	-1.03	1.2	-1.25	1.37	1.21	1.02	1.37	AW463175			HK1	hexokinase 1	1.05	-1.15	1.12	1.11	1.56	1.23	1.13	1.56	AW463175			HK1	hexokinase 1	1.15	1.24	1.26	-1.07	-1.02	1.07	1.26	AW463175
783	LOC613996		-1	-1.06	1.25	-1.03	-1.18	1.03	1.29	1.29	AW463191			LOC613996		1.04	-1.27	1.16	1.01	-1	1.01	1.25	-1.27	AW463191	t60? t120? t480? t720?		LOC613996		-1	1.27	1.18	1.01	-1.01	1.05	1.27	AW463191	t120? t480?
784	MGC142562		-1.28	1.3	-1.48	-1.18	1.06	-1	-1.19	-1.48	AW463193			MGC142562		-1.03	1.34	1.05	1.05	1.34	-1.14	-1.03	1.34	AW463193			MGC142562		-1.02	1.04	-1.21	1.06	-1.15	1.2	-1.21	AW463193
785	ELK4	ELK4, ETS-domain protein (SRF accessory protein 1)	-1	-1.05	1.15	-1.18	1.07	1.31	1.18	1.31	AW463194			ELK4	ELK4, ETS-domain protein (SRF accessory protein 1)	1.01	-1.05	1.24	1.38	1.17	1.26	1.49	1.49	AW463194			ELK4	ELK4, ETS-domain protein (SRF accessory protein 1)	1.34	1.14	1.23	-1.22	1.12	1.07	1.34	AW463194
786	Fbxo32	F-box protein 32	-1.3	-1.01	-1.04	1.17	-1.27	-1.04	1.27	-1.3	AW463198	t15? t30? t60? t120? t240? t720?		Fbxo32	F-box protein 32	-1.36	1.11	-1	1.1	1.18	-1.25	1.28	-1.36	AW463198	t15? t60? t480?		Fbxo32	F-box protein 32	-1.07	-1.09	1.01	1.17	-1.24	1.28	1.28	AW463198	t15? t30? t60? t120?
787	LOC614614		1.39	1.09	-1.07	-1.2	1.35	1.38	-1.14	1.39	AW463201			LOC614614		1.31	1.37	-1.18	-1.14	1.37	1.24	-1.06	1.37	AW463201			LOC614614		1.14	-1.03	1.36	1.27	1.2	1.15	1.36	AW463201
788	DPH2		1.15	-1	-1.1	-1.02	1.14	-1.01	1.03	1.15	AW463207			DPH2		1.15	-1.03	1.21	1.1	-1.03	1	1.1	1.21	AW463207	t240?		DPH2		1.09	1.13	-1.16	-1	1.3	1.03	1.3	AW463207	t60? t120? t480?
789	OXA1L	oxidase assembly 1-like	-1.1	-1.01	-1.23	1.11	1.23	1.11	-1.41	-1.41	AW463209			OXA1L	oxidase assembly 1-like	1.06	1.06	1.18	1.29	1.27	1.05	-1.06	1.29	AW463209			OXA1L	oxidase assembly 1-like	1.16	1.11	-1.1	1.11	1.2	1.03	1.2	AW463209
790	PLAUR	plasminogen activator, urokinase receptor	-1.05	1.04	1.43	-1.02	1.18	1.5	3.61	3.61	AW463210	t15? t30? t60? t240? t720?		PLAUR	plasminogen activator, urokinase receptor	-1.05	1.16	1.29	-1.02	1.31	-1.08	1.14	1.31	AW463210	t15? t30? t60? t120? t240? t720?		PLAUR	plasminogen activator, urokinase receptor	1.19	-1.03	1.22	1.16	1.04	1.49	1.49	AW463210	t15? t30? t60? t120? t240? t480?
791	Appl2		1.1	1.15	-1.19	-1.1	1.12	-1.17	-1.13	-1.19	AW463212			Appl2		1.11	1.25	1.11	-1.16	-1.03	-1.27	-1.05	-1.27	AW463212	t240?		Appl2		1.11	1.05	-1.14	1.17	1.29	1.09	1.29	AW463212	t480?
792	HMOX2	heme oxygenase (decycling) 2 (EC:1.14.99.3)	1.11	1.25	1.24	-1.44	1.09	-1.07	1.17	-1.44	AW463216	t15? t30? t60? t120? t240?		HMOX2	heme oxygenase (decycling) 2 (EC:1.14.99.3)	1.18	1.35	1.43	-1.69	-1.01	-1.24	-1.12	-1.69	AW463216	t120?		HMOX2	heme oxygenase (decycling) 2 (EC:1.14.99.3)	1.19	-1.02	1.07	1.37	1.3	1.15	1.37	AW463216
793	MGC137697		-1.09	1.02	-1.36	-1.17	1.28	1.01	-1.56	-1.56	AW463219			MGC137697		1	-1.01	1.17	1.07	1.2	1.13	1.03	1.2	AW463219			MGC137697		1.25	1.26	-1.21	1.04	1.24	-1.09	1.26	AW463219
794	LOC646970		1.11	-1.05	-1.11	1.05	1.09	1.1	1.04	1.11	AW463226			LOC646970		1.42	1.05	1.15	-1.01	1.12	1.06	1	1.42	AW463226	t15?		LOC646970		-1.13	1.08	-1.05	1.23	1.1	1.03	1.23	AW463226
795	GNG12	guanine nucleotide binding protein (G protein), gamma 12	-1.39	1.11	-1.51	-1.16	1.04	-1.09	-1.37	-1.51	AW463227			GNG12	guanine nucleotide binding protein (G protein), gamma 12	-1.12	1.21	1.07	1.02	1.47	-1.13	-1.29	1.47	AW463227			GNG12	guanine nucleotide binding protein (G protein), gamma 12	-1.01	1.07	-1.23	1.11	-1.21	1.03	-1.23	AW463227
796	SFRS1	splicing factor, arginine/serine-rich 1 (splicing factor 2, alternate splicing factor)	1.01	1.27	1.15	-1.28	1.12	1.24	1.04	-1.28	AW463237			SFRS1	splicing factor, arginine/serine-rich 1 (splicing factor 2, alternate splicing factor)	1.01	1.19	-1.01	1.04	1.29	1.21	1.09	1.29	AW463237			SFRS1	splicing factor, arginine/serine-rich 1 (splicing factor 2, alternate splicing factor)	1.16	1.28	1.42	1.13	1.04	1.06	1.42	AW463237
797	Pno1		-1.03	-1.05	1.18	1.13	1.03	1.03	1.33	1.33	AW463244	t15? t30? t60? t120? t240? t720?		Pno1		1.02	-1.04	1.12	1	1.12	-1.01	1.31	1.31	AW463244	t15? t60? t120? t240?		Pno1		-1.01	1.05	1.21	1.24	1.02	1.08	1.24	AW463244	t15? t30? t60? t120? t480?
798	Galnt3	UDP-N-acetyl-alpha-D-galactosamine:polypeptide N-acetylgalactosaminyltransferase 3 (GalNAc-T3) (EC:2.4.1.41)	-1.15	-1.01	1.48	1.05	1.45	2.01	2.35	2.35	AW463251			Galnt3	UDP-N-acetyl-alpha-D-galactosamine:polypeptide N-acetylgalactosaminyltransferase 3 (GalNAc-T3) (EC:2.4.1.41)	1.02	-1.18	1.17	1.5	1.7	1.83	5.08	5.08	AW463251	t120? t720?		Galnt3	UDP-N-acetyl-alpha-D-galactosamine:polypeptide N-acetylgalactosaminyltransferase 3 (GalNAc-T3) (EC:2.4.1.41)	-1.09	1.28	1.6	-1.11	1	1.06	1.6	AW463251
799	LOC532363		-1.1	-1.03	1.03	-1.06	1.15	1.28	1.26	1.28	AW463252	t240? t480? t720?		LOC532363		1.05	1.04	1.05	-1.05	1.08	1.16	1.12	1.16	AW463252	t15? t30? t60? t120? t240? t480?		LOC532363		-1.06	1	1.04	1.08	1.11	1.03	1.11	AW463252	t60? t120? t480?
800	Ppp1r15b	protein phosphatase 1, regulatory (inhibitor) subunit 15b	-1.02	-1.01	-1.07	-1.01	-1.04	-1.01	-1.13	-1.13	AW463258			Ppp1r15b	protein phosphatase 1, regulatory (inhibitor) subunit 15b	1.09	-1.04	1.08	1.22	-1.07	1.04	1.21	1.22	AW463258			Ppp1r15b	protein phosphatase 1, regulatory (inhibitor) subunit 15b	1.02	1.08	-1.06	-1.06	1.14	1.04	1.14	AW463258	t120?
801	Gramd1b	GRAM domain containing 1B	1.07	-1.06	-1.2	1.06	1.12	-1.03	-1.54	-1.54	AW463259	t15?		Gramd1b	GRAM domain containing 1B	1.8	1.02	1.38	1.04	1.31	-1.04	-1.17	1.8	AW463259	t15?		Gramd1b	GRAM domain containing 1B	-1.45	1.13	-1.32	1.26	-1.04	1.06	-1.45	AW463259
802	OSMR	oncostatin M receptor	1.11	1.16	-1.14	-1.02	1.24	1.14	1.27	1.27	AW463280			OSMR	oncostatin M receptor	1.45	1.2	-1.03	1.25	1.09	1.24	-1.05	1.45	AW463280	t15? t60?		OSMR	oncostatin M receptor	-1.04	1.01	1.08	-1.01	1.24	1.03	1.24	AW463280	t60?
803	CCDC64	coiled-coil domain containing 64	1.13	-1.09	1	1.14	-1.14	-1.01	1.18	1.18	AW463281			CCDC64	coiled-coil domain containing 64	1.23	1.01	1.11	1.3	-1.02	1.13	2.18	2.18	AW463281	t720?		CCDC64	coiled-coil domain containing 64	1.12	1.1	-1.05	1.08	1.11	-1.06	1.12	AW463281
804	LOC532789		1.04	-1.04	1.01	1.13	-1.06	-1.15	-1.15	-1.15	AW463283	t15? t30? t60?		LOC532789		1.05	-1.24	-1.03	1.09	1.01	-1.15	1.27	1.27	AW463283	t60? t120?		LOC532789		1.16	1.26	1.16	1.23	1.07	1.01	1.26	AW463283	t60?
805	TSC22D1		-1.01	1.05	-1.19	-1.02	1.04	1.08	1.08	-1.19	AW463292			TSC22D1		1.1	1.02	1.04	1.21	-1.05	1.08	1.23	1.23	AW463292	t240? t480?		TSC22D1		-1	1.14	-1.07	-1.08	1.23	1.07	1.23	AW463292	t60? t120? t480?
806	RAD23A	RAD23 homolog A (S. cerevisiae)	1.05	1.06	1.01	-1.32	-1.09	1	1.18	-1.32	AW463294	t720?		RAD23A	RAD23 homolog A (S. cerevisiae)	1.02	1.06	1.04	-1.5	1.08	-1.08	-1.03	-1.5	AW463294	t120? t240?		RAD23A	RAD23 homolog A (S. cerevisiae)	1.21	1.02	1.12	1.29	-1.06	1.12	1.29	AW463294	t60? t120?
807	KRT19	keratin 19	-1.35	1.22	-3.69	-1.56	-1.11	1.05	2.08	-3.69	AW463298			KRT19	keratin 19	-1.07	1.94	-1.67	-1.6	1.66	1.28	-1.04	1.94	AW463298	t120? t480?		KRT19	keratin 19	1.2	-1.66	-1.68	1.24	-1.73	-1.14	-1.73	AW463298	t120? t240? t480?
808	Thrap5		1.1	-1.11	1.27	1.35	1.12	1.18	-1.2	1.35	AW463308			Thrap5		1.4	-1.13	1.31	1.65	1.08	1.15	1.17	1.65	AW463308			Thrap5		1.01	1.19	1.08	-1.04	1.27	1.1	1.27	AW463308
809	Fbxo30	F-box protein 30	1.04	1.07	-1.04	1.16	-1.08	1.04	1.2	1.2	AW463310			Fbxo30	F-box protein 30	1.15	1.16	1.36	1.2	-1.17	1.12	1.42	1.42	AW463310	t480?		Fbxo30	F-box protein 30	1	-1.01	-1.16	1.15	1.24	1.01	1.24	AW463310	t60?
810	IFI6		-1.02	1.2	1.17	-1.21	1.11	1.13	1.16	-1.21	AW463311	t15? t30? t240? t720?		IFI6		-1.1	1.16	1.2	-1.56	1.13	-1.14	1.1	-1.56	AW463311	t120?		IFI6		1.25	1.12	1.19	1.53	1.12	1.26	1.53	AW463311
811	ARNT	aryl hydrocarbon receptor nuclear translocator	-1.07	1	-1.1	1.06	-1.13	-1.03	-1.04	-1.13	AW463312	t60? t120? t240? t480? t720?		ARNT	aryl hydrocarbon receptor nuclear translocator	1.03	1.1	1.05	1.11	-1.05	1.02	1.08	1.11	AW463312	t15? t60? t120? t240? t480? t720?		ARNT	aryl hydrocarbon receptor nuclear translocator	1.06	-1.02	-1.13	-1.02	1.03	1.01	-1.13	AW463312	t30? t60? t120? t240? t480?
812	C11orf75		1.13	1.06	1.04	-1.12	1.23	1.28	-1.2	1.28	AW463315			C11orf75		1.12	1.02	1.09	1.23	1.15	1.39	1.1	1.39	AW463315			C11orf75		1.14	1.14	1.15	-1.07	1.2	-1.06	1.2	AW463315
813	MGC137435		1.41	-1.16	1.24	-1.06	-1.22	-1.42	1.03	-1.42	AW463317	t15? t30?		MGC137435		-1.11	1.14	-1.05	-1.31	-1.09	-1.1	1.18	-1.31	AW463317			MGC137435		1.66	-1.11	1.43	1.34	1.04	-1.2	1.66	AW463317
814	AW463320		1	1.08	-1.03	1.13	-1.02	-1.03	-1.49	-1.49	AW463320	t15?		AW463320	Transcribed locus	1.38	1.26	-1.06	1.07	1.15	-1.07	-1.31	1.38	AW463320	t15?		AW463320		-1.37	1.02	1.21	1.32	1.01	1.12	-1.37	AW463320
815	Rnh1	ribonuclease/angiogenin inhibitor 1	1.53	-1.14	1.89	1.19	1.05	-1.11	-1.09	1.89	AW463321	t30? t60?		Rnh1	ribonuclease/angiogenin inhibitor 1	1.31	-1.04	1.44	1.27	1.2	1.03	1.58	1.58	AW463321			Rnh1	ribonuclease/angiogenin inhibitor 1	1.62	1.12	1.51	1.13	1.08	-1.14	1.62	AW463321
816	SC65		1.04	-1.13	1.28	-1.17	-1.54	-1.12	1.42	-1.54	AW463323			SC65		-1.37	1.46	1.31	-1.02	-1.06	-1.08	1.62	1.62	AW463323			SC65		1.4	-1.34	1.21	1.17	-1.2	-1	1.4	AW463323
817	Bpnt1	bisphosphate 3'-nucleotidase 1	1.04	-1.01	1.09	1.03	-1.31	-1.01	-1.31	-1.31	AW463337	t720?		Bpnt1	bisphosphate 3'-nucleotidase 1	-1.07	1.14	1.1	1.34	1.06	1.04	1.21	1.34	AW463337			Bpnt1	bisphosphate 3'-nucleotidase 1	1.16	-1	1.19	-1.02	-1.2	-1.02	-1.2	AW463337
818	LOC616337		1.01	-1.04	1.06	1.04	-1.08	-1.01	-1.04	-1.08	AW463339	t240?		LOC616337		1.02	1.02	1.17	1.06	1.01	1.06	1.03	1.17	AW463339	t15? t60? t120? t240? t480?		LOC616337		1.17	1.02	-1.09	1	1.05	1.02	1.17	AW463339	t30? t60? t120? t240? t480?
819	CLDN1	claudin 1	-1.19	-1.05	-1.14	-1.13	1.07	1.05	1.04	-1.19	AW463346			CLDN1	claudin 1	1.05	1.08	-1.08	1.17	1.14	1.18	-1.11	1.18	AW463346	t60? t120? t240? t480? t720?		CLDN1	claudin 1	-1.08	-1.06	-1.01	-1.15	-1.02	-1.08	-1.15	AW463346	t30? t60? t120? t480?
820	C11orf52		-1.08	-1.2	1.18	-1.01	-1.4	-1.28	1.35	-1.4	AW463356	t15? t30? t120? t240?		C11orf52		-1.37	1.01	-1.02	-1.17	1.16	-1.13	1.65	1.65	AW463356			C11orf52		1.46	-1.07	1.23	1.23	-1.4	-1.11	1.46	AW463356	t120? t240?
821	PHB	prohibitin	1.35	1.13	-1.01	1.14	1.1	1.09	1.25	1.35	AW463359			PHB	prohibitin	1.25	1.11	1.16	1.3	1.07	1.05	1.21	1.3	AW463359			PHB	prohibitin	1.15	1.18	1.13	1.19	1.21	-1.05	1.21	AW463359
822	SAFB	scaffold attachment factor B	-1.03	1.25	-1.71	1.18	1.01	1.02	-1.13	-1.71	AW463379			SAFB	scaffold attachment factor B	1.31	1.47	-1.06	1.14	-1.19	-1.14	1.53	1.53	AW463379			SAFB	scaffold attachment factor B	-1.34	1.05	-1.2	1.28	1.48	1.14	1.48	AW463379
823	TAZ	WW domain containing transcription regulator 1	1.08	-1.15	1.1	1.11	-1.05	-1.04	1.23	1.23	AW463385			TAZ	WW domain containing transcription regulator 1	1.16	-1.14	1.07	1.1	-1.13	1.03	1.55	1.55	AW463385			TAZ	WW domain containing transcription regulator 1	-1.02	1.06	1.06	1.07	1.13	-1.04	1.13	AW463385	t480?
824	SBF1	SET binding factor 1	-1.12	1.24	-1.83	-1.07	1.02	-1.22	-1.4	-1.83	AW463394	t15?		SBF1	SET binding factor 1	1.36	1.52	1.12	-1.02	-1.46	-1.37	1.35	1.52	AW463394			SBF1	SET binding factor 1	-1.39	1	-1.58	1.23	1.79	1.18	1.79	AW463394
825	MGC143192		-1.06	-1.08	1.01	-1.02	1.06	-1.03	1.1	1.1	AW463398			MGC143192		-1	-1.08	1.09	1.37	1.18	1.11	1.47	1.47	AW463398			MGC143192		1.1	1.21	1.11	-1.12	1.02	-1.01	1.21	AW463398
826	VAPA	VAMP (vesicle-associated membrane protein)-associated protein A, 33kDa	-1.48	1.11	-1.27	1.1	1	-1.15	-1.38	-1.48	AW463399			VAPA	VAMP (vesicle-associated membrane protein)-associated protein A, 33kDa	-1.19	1.04	1.13	1.14	1.04	-1.17	1.14	-1.19	AW463399			VAPA	VAMP (vesicle-associated membrane protein)-associated protein A, 33kDa	1.04	1.22	-1.17	1.15	1.18	1.02	1.22	AW463399
827	SLC21A2		1.11	1.03	1.06	-1.14	-1.04	1.02	-1.12	-1.14	AW463400	t15?		SLC21A2		1.22	-1	1.05	-1.14	1.05	1.01	-1.14	1.22	AW463400	t15? t60?		SLC21A2		-1.08	1.04	1.11	1.12	1.03	1.02	1.12	AW463400	t60? t480?
828	POR	P450 (cytochrome) oxidoreductase (EC:1.6.2.4)	1.32	-1.1	1.25	-1.1	-1.35	-1.15	1.09	-1.35	AW463402	t15? t30? t60? t240?		POR	P450 (cytochrome) oxidoreductase (EC:1.6.2.4)	1.03	1.04	1.21	-1.19	1.1	-1.09	1.34	1.34	AW463402			POR	P450 (cytochrome) oxidoreductase (EC:1.6.2.4)	1.43	-1.06	1.16	1.17	-1.25	-1.03	1.43	AW463402
829	LRRC32		1.05	-1.08	1.22	-1.01	-1.07	1.45	1.14	1.45	AW463410	t720?		LRRC32		-1.07	1.08	1.05	1.03	1.05	1.27	1.13	1.27	AW463410	t15? t60? t120? t240? t480? t720?		LRRC32		1.2	-1.13	1.14	1.04	-1.06	1.09	1.2	AW463410	t30? t60? t120? t240? t480?
830	PA2G4	proliferation-associated 2G4, 38kDa	1.39	1.1	1.64	1.24	1.2	1.38	1.07	1.64	AW463412	t60?		PA2G4	proliferation-associated 2G4, 38kDa	-1.01	1.1	1.45	1.53	1.11	1.29	1.49	1.53	AW463412	t120?		PA2G4	proliferation-associated 2G4, 38kDa	1.56	1.12	1.26	1.01	1.31	1.03	1.56	AW463412
831	ID1	inhibitor of DNA binding 1, dominant negative helix-loop-helix protein	-1.14	1.05	-1.28	1.08	1.39	1.1	-1.17	1.39	AW463413			ID1	inhibitor of DNA binding 1, dominant negative helix-loop-helix protein	1.25	1.06	1.04	1.05	1.89	1.05	1	1.89	AW463413	t15? t60?		ID1	inhibitor of DNA binding 1, dominant negative helix-loop-helix protein	-1.22	1.08	-1.14	1.23	-1.28	1.03	-1.28	AW463413	t480?
832	Pdlim2	PDZ and LIM domain 2	1.02	-1.08	-1.24	-1.36	1.18	-1.08	-1.15	-1.36	AW463417	t480?		Pdlim2	PDZ and LIM domain 2	1.32	1.04	1.07	1.01	1.18	1.07	1.05	1.32	AW463417			Pdlim2	PDZ and LIM domain 2	-1.12	-1.01	-1.09	-1.09	1.02	-1.02	-1.12	AW463417	t480?
833	EPB41L1		1.32	1.07	1.47	1.46	-1.01	-1.05	1.47	1.47	AW463421			EPB41L1		1.52	-1.08	1.57	1.65	-1.18	1.07	2.23	2.23	AW463421			EPB41L1		1.04	1.43	1.17	1.18	1.41	-1.09	1.43	AW463421
834	LOC511318		1.1	1.09	-1.01	-1.09	1.13	1.1	1.15	1.15	AW463423	t720?		LOC511318		1.06	-1.02	1.04	1.1	1.16	1.17	1.01	1.17	AW463423	t15? t60?		LOC511318		-1.12	1.19	-1.02	-1.04	1.07	1.01	1.19	AW463423	t15?
835	PVRL2	poliovirus receptor-related 2 (herpesvirus entry mediator B)	1.09	1.11	-1.36	-1.12	1.18	1.52	1.58	1.58	AW463429			PVRL2	poliovirus receptor-related 2 (herpesvirus entry mediator B)	-1.04	1.52	-1.03	-1.16	1.41	1.19	1.03	1.52	AW463429			PVRL2	poliovirus receptor-related 2 (herpesvirus entry mediator B)	1.2	-1.18	-1.07	1.28	-1.05	1.27	1.28	AW463429
836	Tmem112b		-1.02	1.15	-1.39	1.03	1.1	-1.29	-1.19	-1.39	AW463438	t15? t30?		Tmem112b		1.1	1.35	-1.03	-1.05	-1.29	-1.32	1.39	1.39	AW463438	t720?		Tmem112b		-1.07	1.03	-1.14	1.2	1.67	-1.05	1.67	AW463438	t480?
837	Atp6v0e1	ATPase, H+ transporting, lysosomal V0 subunit E1	-1.41	1.06	-1.39	1.06	1.4	1.45	-1.02	1.45	AW463450			Atp6v0e1	ATPase, H+ transporting, lysosomal V0 subunit E1	-1.1	1.06	1.11	1.19	1.35	1.21	1.06	1.35	AW463450			Atp6v0e1	ATPase, H+ transporting, lysosomal V0 subunit E1	1.03	1.19	-1.08	1.21	1.26	1.14	1.26	AW463450
838	TINAGL1	tubulointerstitial nephritis antigen-like 1	-1.24	-1.03	-2.35	-1.52	1.27	1.01	-1.3	-2.35	AW463460	t15? t30? t60? t240?		TINAGL1	tubulointerstitial nephritis antigen-like 1	1.24	1.26	1.19	-1.53	1.01	-1.01	-1.24	-1.53	AW463460			TINAGL1	tubulointerstitial nephritis antigen-like 1	1.1	-1.17	-2.15	1.18	1.39	-1	-2.15	AW463460
839	D6Wsu163e	DNA segment, Chr 6, Wayne State University 163, expressed	1.22	1.22	-1.23	-1.31	1	-1.1	-1.17	-1.31	AW463465	t15? t30? t60?		D6Wsu163e	DNA segment, Chr 6, Wayne State University 163, expressed	1.17	1.37	-1.18	-1.3	-1.01	-1.17	-1.31	1.37	AW463465	t15? t240?		D6Wsu163e	DNA segment, Chr 6, Wayne State University 163, expressed	1.22	-1.13	1.01	1.21	1.15	1.1	1.22	AW463465	t60? t480?
840	Ncapd2		1.13	1.04	-1.19	-1.06	1.07	-1.03	-1.05	-1.19	AW463470	t720?		Ncapd2		1.16	1.19	-1.06	1.11	-1.07	1.02	-1.03	1.19	AW463470	t15? t240? t480?		Ncapd2		-1.04	-1.04	-1.02	-1.1	1.18	-1	1.18	AW463470	t60? t120? t480?
841	FAM43A		1.05	1.11	-1.65	1.04	1.16	1.22	-1.57	-1.65	AW463471			FAM43A		1.32	1.36	1.07	1.08	1.18	1.03	-1.15	1.36	AW463471			FAM43A		-1.14	1.01	-1.43	1.19	1.2	1.18	-1.43	AW463471
842	KCNH1	potassium voltage-gated channel, subfamily H (eag-related), member 1	-1.01	1.02	1.07	1.08	-1.07	-1.13	1.09	-1.13	AW463473	t120? t720?		KCNH1	potassium voltage-gated channel, subfamily H (eag-related), member 1	1.05	-1.09	1.09	1.26	-1.12	1.02	1.17	1.26	AW463473	t15? t30? t60? t120? t240? t480?		KCNH1	potassium voltage-gated channel, subfamily H (eag-related), member 1	1.04	1.29	1.02	-1.11	1.16	-1.06	1.29	AW463473	t15? t30? t60? t120? t240? t480?
843	Cenph	centromere protein H	-1.12	1.34	-1.65	-1.04	1.21	-1.44	-1.26	-1.65	AW463474	t480? t720?		Cenph	centromere protein H	1.11	1.46	1.16	-1.13	-1.03	-1.37	1.06	1.46	AW463474	t240? t480? t720?		Cenph	centromere protein H	-1.01	1.02	-1.56	1.27	1.44	-1.06	-1.56	AW463474	t15? t480?
844	Ccnl2	cyclin L2	1.24	1.11	-1.31	-1.04	1.26	1.16	1.14	-1.31	AW463478	t720?		Ccnl2	cyclin L2	1.24	1.28	-1.04	-1.03	1.12	1.13	-1.2	1.28	AW463478			Ccnl2	cyclin L2	1.01	-1.06	-1.04	1.2	1.12	1.03	1.2	AW463478	t60?
845	C14orf101		-1.02	-1.08	-1.05	1.03	-1.07	1.09	-1.15	-1.15	AW463479			C14orf101		1.07	-1.05	1.13	1.09	-1.1	1.08	1.22	1.22	AW463479	t480?		C14orf101		1.13	1.08	1	1.13	1.18	1.05	1.18	AW463479
846	Dnajc16	DnaJ (Hsp40) homolog, subfamily C, member 16	1.02	-1.06	1.03	1.02	-1.06	1.07	1.09	1.09	AW463481	t720?		Dnajc16	DnaJ (Hsp40) homolog, subfamily C, member 16	1.16	1.02	1.1	-1.01	-1.1	1.09	1.07	1.16	AW463481	t15? t30? t60? t120? t240? t480? t720?		Dnajc16	DnaJ (Hsp40) homolog, subfamily C, member 16	1.03	1.05	-1.03	1.04	1.15	1.08	1.15	AW463481	t30? t60? t120? t240? t480?
847	PRKX	protein kinase, X-linked	1	1.03	-1.17	1.02	1.15	1.31	1.43	1.43	AW463482			PRKX	protein kinase, X-linked	1.08	1.1	1.26	1.49	1.04	1.4	1.33	1.49	AW463482			PRKX	protein kinase, X-linked	1.21	1.07	-1.1	-1.07	1.3	-1.08	1.3	AW463482
848	ELF2	E74-like factor 2 (ets domain transcription factor)	-1.16	1.01	1.15	1.1	1.02	1.35	1.18	1.35	AW463485			ELF2	E74-like factor 2 (ets domain transcription factor)	-1.15	1.14	1.07	1.51	1.15	1.22	1.37	1.51	AW463485			ELF2	E74-like factor 2 (ets domain transcription factor)	1.14	1.04	1.29	-1.07	1.01	1.07	1.29	AW463485
849	LOC618631		-1.07	-1.01	1.03	-1.08	1.41	-1.03	-1.91	-1.91	AW463488			LOC618631		1.04	1	1.13	1.19	1.39	1	-1.13	1.39	AW463488			LOC618631		1.06	1.23	1.08	1.1	1.14	1.03	1.23	AW463488
850	TGM2	transglutaminase 2 (C polypeptide, protein-glutamine-gamma-glutamyltransferase)	-1.08	-1.12	1.18	-1.05	-1.19	-1.15	-1.02	-1.19	AW463491	t15? t120? t240?		TGM2	transglutaminase 2 (C polypeptide, protein-glutamine-gamma-glutamyltransferase)	-1.28	1.02	-1.21	-1.02	1.17	-1.1	1.23	-1.28	AW463491	t15?		TGM2	transglutaminase 2 (C polypeptide, protein-glutamine-gamma-glutamyltransferase)	1.21	-1.01	1.37	1.09	-1.22	-1.03	1.37	AW463491	t60? t120?
851	Col7a1	collagen, type VII, alpha 1	1.09	1.13	-1.01	1.05	-1.05	-1	1.15	1.15	AW463498	t15? t30? t60? t120? t240? t720?		Col7a1	collagen, type VII, alpha 1	1.08	1.08	-1.05	1.06	1.08	-1.01	1.4	1.4	AW463498	t240? t480?		Col7a1	collagen, type VII, alpha 1	1.09	1.13	1.04	1.01	-1.01	1.04	1.13	AW463498	t60? t120? t480?
852	Pcqap	mediator complex subunit 15	-1.03	-1.07	1.2	1.07	-1.1	1.17	-1.04	1.2	AW463499			Pcqap	mediator complex subunit 15	-1.18	1.15	1.11	1.55	1.13	1.39	1.17	1.55	AW463499			Pcqap	mediator complex subunit 15	1.24	-1.02	1.34	-1.09	-1.05	-1.13	1.34	AW463499
853	Snx10	sorting nexin 10	1.03	-1.01	1.47	-1.03	1.03	1.9	1.91	1.91	AW463500			Snx10	sorting nexin 10	-1.04	1.09	1.07	1.28	1.13	1.61	1.37	1.61	AW463500			Snx10	sorting nexin 10	1.11	1.03	1.65	-1.04	1.02	1.17	1.65	AW463500
854	CNP		1.03	-1.31	1.4	1.2	1.16	-1.04	1.11	1.4	AW463518			CNP		-1.04	-1.1	1.31	1.36	1.06	1.08	1.02	1.36	AW463518			CNP		1.17	-1.02	1.25	1.05	1.25	-1.17	1.25	AW463518
855	UCHL1	ubiquitin carboxyl-terminal esterase L1 (ubiquitin thiolesterase)	1.38	-1.46	1.89	1.34	1.2	-1.88	1.05	1.89	AW463522	t15? t30? t60? t120? t240?		UCHL1	ubiquitin carboxyl-terminal esterase L1 (ubiquitin thiolesterase)	-1.05	-1.61	1.14	-2.24	1.6	-1.77	1.61	-2.24	AW463522	t60? t120? t240?		UCHL1	ubiquitin carboxyl-terminal esterase L1 (ubiquitin thiolesterase)	1.58	1.21	1.72	3.17	-1.1	-1.1	3.17	AW463522	t120? t240?
856	MYL9	myosin, light chain 9, regulatory	1.14	-1.01	1.53	-1.41	-1.1	-1.29	-1.03	1.53	AW463524	t15? t30? t60?		MYL9	myosin, light chain 9, regulatory	-1.02	1.35	1.63	-1.85	1.01	-1.38	1.27	-1.85	AW463524			MYL9	myosin, light chain 9, regulatory	1.31	-1.21	1.14	1.75	1.07	1.05	1.75	AW463524
857	Stx12	syntaxin 12	1.01	1.06	-1.1	1.21	-1.03	-1.03	-1.11	1.21	AW463527			Stx12	syntaxin 12	1.07	1.02	1.14	1.3	-1.07	1.05	1.04	1.3	AW463527			Stx12	syntaxin 12	1.09	1.17	-1.05	1.18	1.21	-1.07	1.21	AW463527
858	LOC787672		-1.04	-1.04	-1.14	-1.08	-1.12	1.13	-1.11	-1.14	AW463530	t480? t720?		LOC787672		1.03	1.31	-1.01	-1.03	-1.03	1.02	-1.15	1.31	AW463530	t15? t30? t60? t120? t240? t480? t720?		LOC787672		1.07	-1.16	-1.1	1	1.03	1.17	1.17	AW463530	t15? t30? t60? t120? t240? t480?
859	FOSL2	FOS-like antigen 2	1.19	1.06	-1.14	1.11	1.3	1.79	1.93	1.93	AW463531			FOSL2	FOS-like antigen 2	1.19	1.04	1.06	1.63	1.36	1.44	1.87	1.87	AW463531			FOSL2	FOS-like antigen 2	1.29	1.18	1.01	-1.15	1.11	1.23	1.29	AW463531
860	Marveld3	MARVEL (membrane-associating) domain containing 3	1.14	1.05	1.28	-1.08	1.24	1.03	1.31	1.31	AW463541	t240? t480? t720?		Marveld3	MARVEL (membrane-associating) domain containing 3	-1.02	1.28	-1.12	-1.09	1.11	1.12	1.45	1.45	AW463541	t60? t240? t480? t720?		Marveld3	MARVEL (membrane-associating) domain containing 3	1.3	-1.22	1.37	1.07	1.24	-1.05	1.37	AW463541	t15? t30? t60? t120? t240? t480?
861	Nek7	NIMA (never in mitosis gene a)-related kinase 7	1.11	1.03	-1.09	1.1	-1.11	-1.07	-1.14	-1.14	AW463542	t240?		Nek7	NIMA (never in mitosis gene a)-related kinase 7	1.32	1.06	1.08	1.05	1	-1.05	1.1	1.32	AW463542			Nek7	NIMA (never in mitosis gene a)-related kinase 7	1.05	1.06	-1.04	1.24	1.03	-1	1.24	AW463542	t60?
862	Mrps33		-1.1	1.12	1.02	-1.03	1.03	-1.18	-1.13	-1.18	AW463543	t240? t720?		Mrps33		-1.06	1.12	1.08	-1.24	1.17	-1.1	1.24	1.24	AW463543	t15? t120? t480?		Mrps33		-1.01	1.07	1.04	1.3	-1.03	-1.06	1.3	AW463543	t15? t60? t120? t480?
863	LOC508245		1.06	1.3	-1.14	1.12	-1.14	-1.17	-1.15	1.3	AW463553	t15? t30? t240?		LOC508245		-1.11	1.64	-1.28	-1.21	1.09	-1.15	1.3	1.64	AW463553			LOC508245		1.34	-1.04	1.25	1.5	-1.12	1.06	1.5	AW463553
864	PRP3		1.04	-1.02	1.33	-1.08	1.14	1.14	-1.03	1.33	AW463556	t30? t60? t720?		PRP3		-1.08	1.11	-1.1	1.02	1.12	1.11	1.08	1.12	AW463556	t60? t120? t240? t480?		PRP3		1.09	-1.08	1.36	1.04	1.04	1.01	1.36	AW463556	t30? t60? t120? t480?
865	TMEM1	transmembrane protein 1	1.01	1.13	1.11	1	1.1	-1.05	1.25	1.25	AW463564	t720?		TMEM1	transmembrane protein 1	1.2	1.03	1.19	1.12	1.07	1.06	1.52	1.52	AW463564	t720?		TMEM1	transmembrane protein 1	1.01	1.18	1.01	1.04	1.14	-1.05	1.18	AW463564	t15? t120? t480?
866	C21orf45		-1.06	1.01	-1.03	1.03	1.01	1.02	-1.1	-1.1	AW463565	t480? t720?		C21orf45		-1.02	1.14	1.09	1.03	-1.04	1.04	1.04	1.14	AW463565	t15? t30? t60? t120? t240? t480? t720?		C21orf45		1.2	1.02	-1.07	1.02	1.12	1.06	1.2	AW463565	t30? t60? t120? t240? t480?
867	Dido1		-1	-1.22	1.69	1.04	-1.27	-1.13	1.17	1.69	AW463573	t15? t60?		Dido1		-2.12	-1.09	1.25	-1.17	1.26	1.11	1.33	-2.12	AW463573	t15?		Dido1		1.82	1.03	1.46	1.32	-1.43	-1.2	1.82	AW463573
868	Fbxo42	F-box protein 42	1.46	-1.24	1.3	1.3	1.09	-1	1.03	1.46	AW463585	t15? t120?		Fbxo42	F-box protein 42	1.03	1.15	-1.15	1.57	1.21	1	1.46	1.57	AW463585			Fbxo42	F-box protein 42	1.36	-1.22	1.51	-1.03	1.05	1.05	1.51	AW463585
869	MLLT6	myeloid/lymphoid or mixed-lineage leukemia (trithorax homolog, Drosophila); translocated to, 6	1.3	-1.01	-1.28	1.05	1.1	1.03	-1.34	-1.34	AW463590			MLLT6	myeloid/lymphoid or mixed-lineage leukemia (trithorax homolog, Drosophila); translocated to, 6	1.62	1.12	1.16	1.06	1.1	-1.02	-1.17	1.62	AW463590			MLLT6	myeloid/lymphoid or mixed-lineage leukemia (trithorax homolog, Drosophila); translocated to, 6	1.03	1.07	-1.17	1.18	1.24	1.08	1.24	AW463590
870	Zmat5		-1.03	1.23	-1.14	-1.05	-1.08	1.01	-1.14	1.23	AW463591			Zmat5		1.01	1.46	1.03	-1.17	-1.09	-1.29	-1.46	1.46	AW463591			Zmat5		-1.02	1.01	1.08	1.37	1.22	1.27	1.37	AW463591
871	SLC2A3	solute carrier family 2 (facilitated glucose transporter), member 3	1.02	-1.03	1.25	-1.06	1.23	1.48	1.78	1.78	AW463609	t720?		SLC2A3	solute carrier family 2 (facilitated glucose transporter), member 3	-1.02	1.07	1.04	-1.01	1.16	1.25	1.17	1.25	AW463609	t15? t60? t120? t240? t480?		SLC2A3	solute carrier family 2 (facilitated glucose transporter), member 3	1.13	-1.02	1.19	1.03	1.08	1.2	1.2	AW463609	t30? t60? t120? t480?
872	SGK		1.04	1.01	1.01	1.01	-1.01	1.01	1	1.04	AW463612	t720?		SGK		1	1.25	1.09	-1	-1	-1.02	1.11	1.25	AW463612	t15? t30? t60? t120? t240? t480? t720?		SGK		1.19	-1.04	-1.06	1.02	1.11	1.15	1.19	AW463612	t30? t60? t120? t240? t480?
873	LOC618507		1	-1.07	1.09	-1.12	-1.02	1.07	-1.15	-1.15	AW463613			LOC618507		-1.02	-1.05	1.09	1.1	-1.01	1.12	1.06	1.12	AW463613			LOC618507		1.12	1.05	1.16	-1.08	1.06	1.03	1.16	AW463613	t60? t480?
874	MLLT4	myeloid/lymphoid or mixed-lineage leukemia (trithorax homolog, Drosophila); translocated to, 4	-1.07	1.02	-1.07	-1.16	1	-1.04	-1.06	-1.16	AW463615	t720?		MLLT4	myeloid/lymphoid or mixed-lineage leukemia (trithorax homolog, Drosophila); translocated to, 4	1.01	1.22	1	-1.06	1.02	-1.04	1.06	1.22	AW463615	t15? t30? t60? t120? t240? t480? t720?		MLLT4	myeloid/lymphoid or mixed-lineage leukemia (trithorax homolog, Drosophila); translocated to, 4	1.11	1.02	-1.03	-1.05	1.14	1.16	1.16	AW463615	t15? t30? t60? t120? t240? t480?
875	RPL14	ribosomal protein L14	1.08	1.01	1.61	1.35	-1.64	-1.08	-1.14	-1.64	AW463621	t15?		RPL14	ribosomal protein L14	-1.29	-1.03	1.34	1.19	1	-1.1	1.06	1.34	AW463621			RPL14	ribosomal protein L14	1.43	1.24	1.46	1.53	-1.37	-1.05	1.53	AW463621
876	Erlin2		1.01	-1.03	-1.03	1.09	-1.22	1.05	-1.24	-1.24	AW463628	t720?		Erlin2		-1.01	-1.04	-1.02	1.12	1.02	1.12	-1.01	1.12	AW463628	t30? t120? t480?		Erlin2		1.1	1.1	1.1	1.06	-1.14	-1.04	-1.14	AW463628	t60? t120? t480?
877	LILRB5		-1.04	1.25	-1.27	-1.09	-1.01	-1.05	-1.08	-1.27	AW463629			LILRB5		-1.06	1.17	1.14	-1.12	-1.18	-1.1	1.47	1.47	AW463629	t240?		LILRB5		1.32	1.14	-1.26	1.1	1.34	1.1	1.34	AW463629	t15? t120? t480?
878	Ndufa1	NADH dehydrogenase (ubiquinone) 1 alpha subcomplex, 1, 7.5kDa (EC:1.6.5.3)	-1.06	1.12	1.41	1.1	-1.05	1.01	-1.04	1.41	AW463631			Ndufa1	NADH dehydrogenase (ubiquinone) 1 alpha subcomplex, 1, 7.5kDa (EC:1.6.5.3)	-1.07	-1.42	1.34	1.24	-1.06	1.07	-1.18	-1.42	AW463631	t30?		Ndufa1	NADH dehydrogenase (ubiquinone) 1 alpha subcomplex, 1, 7.5kDa (EC:1.6.5.3)	1.16	1.69	1.29	1.1	1.23	-1.09	1.69	AW463631	t30?
879	Ptplb	protein tyrosine phosphatase-like (proline instead of catalytic arginine), member b	-1.36	-1.05	-1.35	-1.02	1.13	-1	-1.39	-1.39	AW463633	t15? t30? t240? t480? t720?		Ptplb	protein tyrosine phosphatase-like (proline instead of catalytic arginine), member b	1	1.02	1.01	-1.01	1.24	1.06	-1.56	-1.56	AW463633	t15? t60? t120? t240? t480? t720?		Ptplb	protein tyrosine phosphatase-like (proline instead of catalytic arginine), member b	-1.21	-1.06	-1.19	1.05	-1.11	-1.01	-1.21	AW463633	t30? t60? t120? t240? t480?
880	KIAA1787		1.14	1.18	-1.25	1.04	1.34	1.07	-1.55	-1.55	AW463635			KIAA1787		1.53	1.12	1.18	1.33	1.38	1.06	-1.37	1.53	AW463635	t15?		KIAA1787		-1.05	1.25	-1.16	-1.01	1.1	1.07	1.25	AW463635
881	Ss18l1		1.12	-1.1	1.28	1.02	1.04	1.01	1.04	1.28	AW463640			Ss18l1		1.11	-1.25	1.08	1.44	1.03	1.09	1.36	1.44	AW463640			Ss18l1		1.2	1.24	1.34	-1.14	1.21	1.04	1.34	AW463640
882	hCG_2015269	phosphoglycerate mutase 1-like	1.08	-1.02	1.24	1.27	1.04	1.2	1.76	1.76	AW463643			hCG_2015269	phosphoglycerate mutase 1-like	1.24	1.08	1.28	1.47	1.11	1.15	1.17	1.47	AW463643			hCG_2015269	phosphoglycerate mutase 1-like	-1	1.08	1.21	1.11	1.12	-1.04	1.21	AW463643
883	ERG	v-ets erythroblastosis virus E26 oncogene homolog (avian)	-1.09	-1.22	1.3	-1.12	1.03	1.02	1.05	1.3	AW463645			ERG	v-ets erythroblastosis virus E26 oncogene homolog (avian)	1.13	-1.22	1.15	1.16	1.08	1.09	1.22	1.22	AW463645	t720?		ERG	v-ets erythroblastosis virus E26 oncogene homolog (avian)	-1.02	1.12	1.36	-1.02	1.12	1.01	1.36	AW463645
884	ABHD10		-1.09	1.05	-1.28	-1.08	-1.01	-1.18	-1.18	-1.28	AW463649	t240? t720?		ABHD10		1.03	1.2	-1.05	-1.12	-1.08	-1.22	-1.06	-1.22	AW463649	t15? t60? t120? t240? t480? t720?		ABHD10		1.04	-1.13	-1.14	1.15	1.19	1.03	1.19	AW463649	t15? t30? t60? t120? t480?
885	C1orf91	chromosome 1 open reading frame 91	-1.03	1.03	1.1	-1.08	1.08	-1.03	1.19	1.19	AW463651			C1orf91	chromosome 1 open reading frame 91	1.04	1.06	1.11	1.12	-1.03	1.04	1.16	1.16	AW463651	t15? t240? t480? t720?		C1orf91	chromosome 1 open reading frame 91	1.1	1.05	1.1	-1.11	1.15	-1.02	1.15	AW463651	t15? t30? t60? t120? t480?
886	Mfn2	mitofusin 2	-1.23	-1.08	-1.14	-1.26	1.12	-1.01	-1.25	-1.26	AW463654			Mfn2	mitofusin 2	1.13	-1.04	-1.06	1.03	1.2	1.1	-1.17	1.2	AW463654			Mfn2	mitofusin 2	-1.12	1.07	1.18	1.01	1.06	-1.02	1.18	AW463654
887	SPIN1		1.13	1.12	1.01	-1.04	-1.11	-1.14	1.1	-1.14	AW463655			SPIN1		1.01	1.1	-1.1	-1.02	1.09	-1.06	1.21	1.21	AW463655	t15? t120? t240? t720?		SPIN1		1.12	1.04	1.16	1.07	-1.13	-1.06	1.16	AW463655	t30? t60? t120? t480?
888	SDHA	succinate dehydrogenase complex, subunit A, flavoprotein (Fp)	1.01	-1.03	-1.14	-1.44	1.18	1.14	-1.07	-1.44	AW463656			SDHA	succinate dehydrogenase complex, subunit A, flavoprotein (Fp)	1.09	1.23	1.09	-1.49	1.02	1.07	-1.09	-1.49	AW463656			SDHA	succinate dehydrogenase complex, subunit A, flavoprotein (Fp)	-1.1	-1.21	-1.07	1.27	1.2	1.11	1.27	AW463656
889	LOC613430		-1.04	-1.39	1.43	-1.15	-1.29	-1	1.16	1.43	AW463663	t15?		LOC613430		-1.55	-1.26	-1.09	-1.26	1.26	1.3	1.1	-1.55	AW463663			LOC613430		1.5	1.02	1.69	1.19	-1.5	-1.26	1.69	AW463663	t480?
890	LOC729867		1.24	1.02	-1.01	1.07	-1.06	-1.19	-1.1	1.24	AW463665			LOC729867		-1.06	1.16	1.01	1.12	1.09	-1.15	1.32	1.32	AW463665			LOC729867		1.25	1.02	1.06	1.1	-1.03	1.02	1.25	AW463665	t60?
891	Chd3	chromodomain helicase DNA binding protein 3	1.22	-1.01	1.05	1.02	1.02	-1.19	-1.05	1.22	AW463670	t240?		Chd3	chromodomain helicase DNA binding protein 3	1.12	1.05	1.12	-1.08	1.12	-1.13	1.14	1.14	AW463670			Chd3	chromodomain helicase DNA binding protein 3	1.15	1.05	1.1	1.28	1.03	-1.06	1.28	AW463670
892	YRDC		-1.02	1.04	-1.22	-1.19	1.16	1.07	1.03	-1.22	AW463671			YRDC		1.07	1.04	1.1	1.17	1.11	1.1	1.05	1.17	AW463671			YRDC		1.11	1.15	-1.09	-1.13	1.16	1.02	1.16	AW463671
893	AW463674		-1.05	-1	-1.02	-1.08	1.11	1.03	-1.04	1.11	AW463674	t480? t720?		AW463674		1.04	1.19	1	-1.01	1.04	1.03	1.04	1.19	AW463674	t15? t30? t60? t120? t240? t480? t720?		AW463674		1.04	-1.07	1	-1.01	1.16	1.14	1.16	AW463674	t30? t60? t120? t240? t480?
894	KRCC1	lysine-rich coiled-coil 1	-1.02	-1.01	1.01	-1.01	-1.1	1.17	-1.22	-1.22	AW463683			KRCC1	lysine-rich coiled-coil 1	1.09	1.06	1.14	1.25	-1.03	1.09	1.02	1.25	AW463683	t720?		KRCC1	lysine-rich coiled-coil 1	-1.05	1.06	1.12	-1.03	1.1	1.05	1.12	AW463683	t15?
895	ABT1	activator of basal transcription 1	1.15	1.13	-1.33	-1.09	1.39	1.22	1.23	1.39	AW463688			ABT1	activator of basal transcription 1	1.4	1.37	-1.08	-1.09	1.57	-1.15	1.08	1.57	AW463688	t15?		ABT1	activator of basal transcription 1	-1.15	-1.1	1.03	1.21	-1.04	1.53	1.53	AW463688
896	Bxdc1	brix domain containing 1	-1.1	1.08	-1.2	-1.05	1.2	1.14	1.23	1.23	AW463689			Bxdc1	brix domain containing 1	1.02	1.01	1.11	1.22	-1.02	1.12	1.15	1.22	AW463689			Bxdc1	brix domain containing 1	1.08	1.23	-1.06	-1.02	1.37	1.01	1.37	AW463689
897	ERCC1	excision repair cross-complementing rodent repair deficiency, complementation group 1 (includes overlapping antisense sequence)	1.01	1.02	-1.06	-1.33	1.02	1.16	-1.01	-1.33	AW463694	t15? t240?		ERCC1	excision repair cross-complementing rodent repair deficiency, complementation group 1 (includes overlapping antisense sequence)	1	1	-1.04	-1.2	1.16	-1	-1.07	-1.2	AW463694			ERCC1	excision repair cross-complementing rodent repair deficiency, complementation group 1 (includes overlapping antisense sequence)	1	1.06	1.16	1.09	-1.06	1.21	1.21	AW463694
898	Txnl1		1.22	-1.13	1.17	1.14	-1.27	1.32	1.15	1.32	AW463695			Txnl1		1.39	-1.04	1.27	1.55	1.06	1.26	1.1	1.55	AW463695	t15? t480? t720?		Txnl1		-1.02	-1.09	1.08	-1.1	-1.05	1.08	-1.1	AW463695
899	MGC128806		-1.07	-1.01	-1.25	-1.02	1.08	-1.1	-1.09	-1.25	AW463702			MGC128806		1.05	1.04	1.07	1.11	-1.11	-1.02	-1.05	1.11	AW463702	t15? t60? t240? t480?		MGC128806		1.1	1.09	-1.13	-1.05	1.28	-1.01	1.28	AW463702	t30? t60? t120? t240? t480?
900	SLC7A7	solute carrier family 7 (cationic amino acid transporter, y+ system), member 7	1.07	1.3	-1.69	-1.09	1.04	-1.26	-3.02	-3.02	AW463705			SLC7A7	solute carrier family 7 (cationic amino acid transporter, y+ system), member 7	1.21	1.35	-1.03	1.23	1.07	-1.16	-1.85	-1.85	AW463705			SLC7A7	solute carrier family 7 (cationic amino acid transporter, y+ system), member 7	1.25	1.17	-1.17	1.01	1.26	1	1.26	AW463705
901	ALDH5A1	aldehyde dehydrogenase 5 family, member A1 (succinate-semialdehyde dehydrogenase)	-1.32	1.2	-1.22	-1.08	1	-1.09	-1.11	-1.32	AW463717	t15? t30? t120? t240? t480? t720?		ALDH5A1	aldehyde dehydrogenase 5 family, member A1 (succinate-semialdehyde dehydrogenase)	-1.02	1.36	-1.1	-1.06	1.06	-1.18	-1.11	1.36	AW463717	t15? t30? t60? t120? t240? t480? t720?		ALDH5A1	aldehyde dehydrogenase 5 family, member A1 (succinate-semialdehyde dehydrogenase)	-1.21	-1.13	-1.1	1.04	1.08	1.09	-1.21	AW463717	t15? t30? t60? t120? t480?
902	CBLC	Cas-Br-M (murine) ecotropic retroviral transforming sequence c	-1.2	1.23	-1.39	-1.04	1.25	1.01	1.14	-1.39	AW463722	t15? t30? t120? t240? t480?		CBLC	Cas-Br-M (murine) ecotropic retroviral transforming sequence c	-1.01	1.79	-1.09	-1.27	1.33	-1.18	-1.34	1.79	AW463722	t15? t30? t60? t240? t480? t720?		CBLC	Cas-Br-M (murine) ecotropic retroviral transforming sequence c	-1.16	-1.42	-1.23	1.32	-1.04	1.25	-1.42	AW463722	t30? t60? t120? t240? t480?
903	Bt.5941		1	1.12	-1.02	1.04	1.02	1.17	-1.28	-1.28	AW463726	t120?		Bt.5941		1.03	1.24	1.03	1.15	1.08	1.05	1.09	1.24	AW463726			Bt.5941		1.07	-1.01	1.08	1.05	1.04	1.11	1.11	AW463726	t60? t120?
904	LSM14A	LSM14A, SCD6 homolog A (S. cerevisiae)	-1.18	1.03	1.04	-1.02	1.1	1.13	-1.02	-1.18	AW463739			LSM14A	LSM14A, SCD6 homolog A (S. cerevisiae)	-1.07	-1.1	1.23	1.34	1.05	1.1	1.17	1.34	AW463739			LSM14A	LSM14A, SCD6 homolog A (S. cerevisiae)	1.09	1.34	1.09	-1.04	1.25	1.04	1.34	AW463739
905	Hibch	3-hydroxyisobutyryl-Coenzyme A hydrolase	-1.07	1.17	-1.1	1.01	1.05	1.07	-1.17	1.17	AW463747			Hibch	3-hydroxyisobutyryl-Coenzyme A hydrolase	-1.1	1.09	1.04	1.17	-1.01	1.11	1.04	1.17	AW463747	t15? t240? t480?		Hibch	3-hydroxyisobutyryl-Coenzyme A hydrolase	1.01	1.18	1.02	1.01	1.14	-1	1.18	AW463747	t60? t120? t480?
906	CLDN4	claudin 4	1.14	1.16	-1.29	1.26	1.1	1.11	1.32	1.32	AW463750			CLDN4	claudin 4	1.22	1.18	1.19	1.34	-1.06	-1.04	2.43	2.43	AW463750			CLDN4	claudin 4	1.14	1.21	-1.23	1.26	1.41	1.19	1.41	AW463750
907	FZD4	frizzled homolog 4 (Drosophila)	1.15	-1.13	1.08	1.07	1.16	-1.1	-1.12	1.16	AW463754			FZD4	frizzled homolog 4 (Drosophila)	-1.11	-1.1	1.01	1.25	-1.28	1.1	1.11	-1.28	AW463754	t15? t60? t120? t240?		FZD4	frizzled homolog 4 (Drosophila)	1.21	1.07	1.15	1.02	1.67	-1.12	1.67	AW463754	t60? t240?
908	C20orf30		1.08	1.16	-1.22	1.11	1.05	1.01	1.21	-1.22	AW463764			C20orf30		1.03	1	1.13	1.47	1.08	1.1	1.44	1.47	AW463764			C20orf30		1.2	1.36	-1.04	-1.01	1.15	-1.08	1.36	AW463764
909	Wdr61	WD repeat-containing protein 61	1.02	1.09	-1.42	-1.32	1.21	1.15	-1.11	-1.42	AW463770			Wdr61	WD repeat-containing protein 61	1.26	1.24	-1.09	-1.12	1.08	1.07	-1.24	1.26	AW463770			Wdr61	WD repeat-containing protein 61	-1.06	-1.06	1	1.15	1.23	1.11	1.23	AW463770	t30?
910	Sirt7	sirtuin 7 (silent mating type information regulation 2, homolog) 7 (S. cerevisiae)	1.2	1.09	-1.38	-1.16	1.06	1.06	1.14	-1.38	AW463779			Sirt7	sirtuin 7 (silent mating type information regulation 2, homolog) 7 (S. cerevisiae)	1.14	1.2	1.05	1.35	1.06	1.26	1.2	1.35	AW463779			Sirt7	sirtuin 7 (silent mating type information regulation 2, homolog) 7 (S. cerevisiae)	1.23	1.09	-1.19	-1.31	1.17	-1.04	-1.31	AW463779
911	SLC35B2		1.15	1.22	-1.07	1.19	1.14	1.05	1.12	1.22	AW463780			SLC35B2		1.21	1.14	1.21	1.57	-1.02	1.13	1.25	1.57	AW463780			SLC35B2		1.19	1.35	-1.03	1.01	1.42	-1.02	1.42	AW463780
912	SERTAD3	SERTA domain containing 3	-1.19	1.44	-1.96	-1.04	1.18	1.24	-1.03	-1.96	AW463787	t15? t30? t60? t120?		SERTAD3	SERTA domain containing 3	1.02	1.58	-1.28	1.15	1.69	-1.23	-1.15	1.69	AW463787	t240? t480?		SERTAD3	SERTA domain containing 3	-1.45	1.11	-1.46	-1.09	-1.1	1.75	1.75	AW463787	t15? t120?
913	Slc41a3	solute carrier family 41, member 3	1.23	1	-1.29	1.09	1.47	1.25	-1.04	1.47	AW463791			Slc41a3	solute carrier family 41, member 3	1.4	1.21	1.19	1.14	1.16	1.06	-1.01	1.4	AW463791			Slc41a3	solute carrier family 41, member 3	1.04	1.02	-1.29	1.29	1.53	1.22	1.53	AW463791
914	RBM35B	RNA binding motif protein 35B	-1.16	-1.11	-1.12	-1.07	-1.1	1.01	1.02	-1.16	AW463793	t480? t720?		RBM35B	RNA binding motif protein 35B	1.07	1.05	1.05	1.01	1.03	-1.02	1.06	1.07	AW463793	t15? t30? t60? t120? t240? t480? t720?		RBM35B	RNA binding motif protein 35B	-1.12	-1.05	-1.13	-1.01	-1.1	1.08	-1.13	AW463793	t15? t30? t60? t120? t240? t480?
915	LITAF	lipopolysaccharide-induced TNF factor	-1.14	-1.06	-1.24	-1.07	1.05	-1.13	-1.1	-1.24	AW463801	t480? t720?		LITAF	lipopolysaccharide-induced TNF factor	1.06	1.1	1.06	-1.06	1.06	-1.14	-1.04	-1.14	AW463801	t15? t30? t60? t240? t480? t720?		LITAF	lipopolysaccharide-induced TNF factor	-1.17	-1.04	-1.22	1.07	1.04	1.04	-1.22	AW463801	t30? t60? t120? t240? t480?
916	Zwilch		1.01	-1.13	1.26	1.2	1.14	1.06	-1.06	1.26	AW463804			Zwilch		-1	-1.07	1.17	1.73	1.09	1.27	1.08	1.73	AW463804			Zwilch		1.16	1.13	1.36	-1.12	1.22	-1.17	1.36	AW463804
917	NCOR2	nuclear receptor co-repressor 2	1.18	-1.15	1.61	1.17	-1.04	-1.34	1.14	1.61	AW463805	t15? t30? t60? t120? t240? t480? t720?		NCOR2	nuclear receptor co-repressor 2	1.01	-1.08	1.35	1.06	1.32	-1.16	1.17	1.35	AW463805	t15? t60? t120?		NCOR2	nuclear receptor co-repressor 2	1.33	1.05	1.26	1.19	-1.16	-1.13	1.33	AW463805	t30? t60? t120? t480?
918	EPS15L1		1.33	-1.37	2.1	1.18	-1.33	1.01	1.44	2.1	AW463807	t15?		EPS15L1		-1.59	1.08	1.74	1.63	1.17	1.01	1.71	1.74	AW463807	t720?		EPS15L1		2.1	-1.22	1.48	-1.09	-1.29	1.04	2.1	AW463807
919	C14orf11		1.13	-1.02	-1.16	1.06	-1.07	1.05	-1.17	-1.17	AW463810			C14orf11		1	1.27	-1.02	1.17	-1.01	-1.01	-1.08	1.27	AW463810			C14orf11		1.07	-1.12	1.05	1.14	1.06	1.02	1.14	AW463810	t60?
920	LOC509687		-1.13	1.02	-1.34	-1.1	-1.04	-1.19	-1.06	-1.34	AW463813	t15? t30? t60? t240? t480?		LOC509687		1.06	1.15	-1.05	-1.14	1.13	-1.19	1.07	-1.19	AW463813	t15? t60? t120? t240? t480?		LOC509687		-1.02	-1.02	-1.16	1.13	-1.09	-1.01	-1.16	AW463813	t15? t30? t60? t240? t480?
921	Ccdc28a	coiled-coil domain containing 28A	-1.21	1.14	-1.49	1.04	1.17	1.08	-1.29	-1.49	AW463826			Ccdc28a	coiled-coil domain containing 28A	1.01	1.14	-1.01	1.24	1.02	1.08	-1.16	1.24	AW463826	t240? t480?		Ccdc28a	coiled-coil domain containing 28A	-1.06	1.11	-1.17	1.03	1.16	1	-1.17	AW463826	t60?
922	Fosb	FBJ osteosarcoma oncogene B	1.55	-1.12	1.4	-1.2	1.24	-1.04	1.45	1.55	AW463832			Fosb	FBJ osteosarcoma oncogene B	1.43	-1.07	1.44	1.25	1.09	1.13	2.33	2.33	AW463832			Fosb	FBJ osteosarcoma oncogene B	1.35	1.2	1.1	-1.04	1.37	-1.1	1.37	AW463832
923	Rbm22		-1.09	1.14	1.21	1.21	1.13	1.24	1.15	1.24	AW463849			Rbm22		1.07	-1.11	1.27	1.45	-1.03	1.24	1.04	1.45	AW463849			Rbm22		1.06	1.41	1.11	1.02	1.39	-1.02	1.41	AW463849
924	GIT1	G protein-coupled receptor kinase interactor 1	1.54	-1.32	2.03	1.34	1	1.16	-1.03	2.03	AW463852			GIT1	G protein-coupled receptor kinase interactor 1	1.27	-1.5	1.49	1.46	1.27	1.25	1.32	-1.5	AW463852			GIT1	G protein-coupled receptor kinase interactor 1	1.48	1.37	1.65	1.17	-1.05	-1.02	1.65	AW463852
925	AW463871		1.14	-1.15	1.09	1.03	1.03	-1.15	1.24	1.24	AW463871			AW463871		-1.04	-1.2	1.23	1.03	-1.09	-1.06	1.43	1.43	AW463871	t15? t30? t120?		AW463871		1.19	1.19	-1.12	1.13	1.29	-1.03	1.29	AW463871	t30? t60? t120? t480?
926	MGC128574		1.19	1.02	1.09	-1.02	1.12	1.11	1.1	1.19	AW463882	t15? t60? t720?		MGC128574		1.19	-1.04	1.03	1.19	-1.05	1.02	1.19	1.19	AW463882	t15? t60? t120? t240? t480?		MGC128574		1.11	1.12	1.09	-1.05	1.24	1.09	1.24	AW463882	t60? t120? t480?
927	Tor2a	torsin family 2, member A	1.14	-1.02	-1.05	1.04	-1.06	-1.11	-1.08	1.14	AW463883	t60? t240?		Tor2a	torsin family 2, member A	1.1	1.04	1.02	1.03	-1.03	-1.03	-1.03	1.1	AW463883	t60? t240? t480?		Tor2a	torsin family 2, member A	1.13	1.02	-1.08	1.1	1.08	-1.03	1.13	AW463883	t60? t120? t480?
928	SERPINB9	serpin peptidase inhibitor, clade B (ovalbumin), member 9	-1.14	1.05	-1.01	1.01	1.02	1.01	-1.03	-1.14	AW463885			SERPINB9	serpin peptidase inhibitor, clade B (ovalbumin), member 9	-1.06	1.01	1.09	1.13	-1.03	1.04	1.11	1.13	AW463885	t15? t30? t60? t120? t240? t480?		SERPINB9	serpin peptidase inhibitor, clade B (ovalbumin), member 9	1.1	1.13	-1.04	-1.06	1.2	1.05	1.2	AW463885	t30? t60? t120? t240? t480?
929	FARS2	phenylalanine-tRNA synthetase 2 (mitochondrial)	-1.29	1.55	-1.36	-1.13	1.31	-1.04	-1.21	1.55	AW463888	t15?		FARS2	phenylalanine-tRNA synthetase 2 (mitochondrial)	-1.11	1.46	1.07	-1.03	-1.11	1.09	-1.12	1.46	AW463888			FARS2	phenylalanine-tRNA synthetase 2 (mitochondrial)	1.01	1.18	-1.29	1.08	1.59	-1.12	1.59	AW463888
930	ADAMTSL5		1.19	-1.06	-1.26	1.06	1.28	-1.11	-1.38	-1.38	AW463889			ADAMTSL5		1.33	1.26	1.07	1.24	1.02	-1.21	1.04	1.33	AW463889			ADAMTSL5		1.06	-1.07	-1.18	1.12	1.51	1.13	1.51	AW463889
931	Gnpda2	glucosamine-6-phosphate deaminase 2	1.04	-1.05	-1.34	-1.33	1.29	1.03	-1.02	-1.34	AW463892			Gnpda2	glucosamine-6-phosphate deaminase 2	1.27	1.18	1.08	-1.14	1.14	1.07	-1.13	1.27	AW463892	t15? t240?		Gnpda2	glucosamine-6-phosphate deaminase 2	-1.03	-1.08	-1.14	1.06	1.16	-1.01	1.16	AW463892
932	NDUFC2	NADH dehydrogenase (ubiquinone) 1, subcomplex unknown, 2, 14.5kDa	-1.07	-1.09	1.17	1.1	-1.28	-1.3	-1.23	-1.3	AW463894	t15? t120? t240?		NDUFC2	NADH dehydrogenase (ubiquinone) 1, subcomplex unknown, 2, 14.5kDa	-1.01	-1.05	1.12	1.01	1.07	-1.21	-1	-1.21	AW463894			NDUFC2	NADH dehydrogenase (ubiquinone) 1, subcomplex unknown, 2, 14.5kDa	-1.02	-1.03	1.19	1.28	-1.16	-1.15	1.28	AW463894	t480?
933	LOC652614	similar to HLA class I histocompatibility antigen, A-11 alpha chain precursor (MHC class I antigen A*11)	1.42	1.37	-1.42	-1.27	1.15	1.01	-2.2	-2.2	AW463903	t30?		LOC652614	similar to HLA class I histocompatibility antigen, A-11 alpha chain precursor (MHC class I antigen A*11)	1.94	1.5	1.01	-1.48	1.39	-1.19	-1.49	1.94	AW463903			LOC652614	similar to HLA class I histocompatibility antigen, A-11 alpha chain precursor (MHC class I antigen A*11)	-1.07	1.11	-1.01	1.63	1.06	1.24	1.63	AW463903	t30?
934	Asah1	N-acylsphingosine amidohydrolase 1	-1.17	1.13	-1.16	1.15	1.46	1.31	1.26	1.46	AW463906			Asah1	N-acylsphingosine amidohydrolase 1	-1.1	1.09	1.14	1.14	1.18	1.25	1.87	1.87	AW463906	t15? t240?		Asah1	N-acylsphingosine amidohydrolase 1	1.13	1.2	-1.08	1.15	1.3	1.06	1.3	AW463906
935	ZNF512		-1.04	-1.08	1.17	1.21	-1.12	1.04	1.09	1.21	AW463908	t15? t60? t120?		ZNF512		1.07	-1.15	1.26	1.16	-1.02	1.03	-1.08	1.26	AW463908	t60? t120? t720?		ZNF512		1.01	1.19	1.07	1.15	1.07	1.03	1.19	AW463908	t120? t480?
936	KRT18	keratin 18	1.68	-1.16	2.81	1.66	1.21	-1.3	1.31	2.81	AW463915	t60?		KRT18	keratin 18	1.31	-1.34	1.31	-1.26	1.32	-1.28	1.99	1.99	AW463915	t60? t120?		KRT18	keratin 18	1.37	1.43	2.26	2.57	1.05	-1.04	2.57	AW463915	t120? t240?
937	Ube2q2	ubiquitin-conjugating enzyme E2Q (putative) 2	1.13	-1.08	1.28	1.11	1.2	1.13	1.11	1.28	AW463916			Ube2q2	ubiquitin-conjugating enzyme E2Q (putative) 2	1.03	-1.26	1.33	1.25	1.21	1.05	1.27	1.33	AW463916	t30?		Ube2q2	ubiquitin-conjugating enzyme E2Q (putative) 2	1.25	1.33	1.14	1.07	1.11	1.05	1.33	AW463916	t30?
938	GRN	granulin	-1.08	1.14	-1.02	-1.06	-1.52	-1.1	1.04	-1.52	AW463918	t15? t30? t240?		GRN	granulin	-1.07	1.15	1.02	-1.09	1.19	-1.03	1.67	1.67	AW463918			GRN	granulin	1.06	1.07	1.14	1.23	-1.47	-1.06	-1.47	AW463918
939	BAT1	HLA-B associated transcript 1	-1.03	1.17	1.16	-1.03	-1.05	1.24	-1.1	1.24	AW463923			BAT1	HLA-B associated transcript 1	-1.13	-1	1.17	1.35	1.02	1.19	1.05	1.35	AW463923			BAT1	HLA-B associated transcript 1	1.34	1.29	1.22	-1.05	1.13	1.03	1.34	AW463923
940	CD74	CD74 molecule, major histocompatibility complex, class II invariant chain	-1.31	-1.09	-2.39	-1.79	1.05	-1.18	1.06	-2.39	AW463930			CD74	CD74 molecule, major histocompatibility complex, class II invariant chain	1.07	1.96	-1.17	-2.07	-1.61	-1.25	-1.22	-2.07	AW463930			CD74	CD74 molecule, major histocompatibility complex, class II invariant chain	1.04	-1.7	-1.47	1.55	2.08	1.02	2.08	AW463930
941	RPS19BP1		1.07	-1.07	1.17	-1.11	-1.04	1.07	1.15	1.17	AW463938			RPS19BP1		-1.13	1.05	-1.13	-1.19	1.29	1.07	1.15	1.29	AW463938			RPS19BP1		1.28	1.01	1.49	1.25	-1.21	-1.01	1.49	AW463938	t60?
942	PHYHD1		1.1	-1.02	1.19	-1.2	-1.25	-1.02	-1.6	-1.6	AW463942	t720?		PHYHD1		1.14	1.01	-1	-1.09	-1.08	1.07	-1.26	-1.26	AW463942	t15? t60? t120? t240? t480?		PHYHD1		1.21	1.09	1.22	-1.02	-1.08	-1.05	1.22	AW463942	t30? t60? t120? t480?
943	Tpcn2	two pore segment channel 2	1.24	1.02	1.01	1.44	-1.14	-1.1	1.04	1.44	AW463943	t15?		Tpcn2	two pore segment channel 2	-1.16	1.48	-1.03	1.33	1.19	-1.1	1.27	1.48	AW463943			Tpcn2	two pore segment channel 2	1.37	-1.17	1.07	1.28	-1.18	1.06	1.37	AW463943
944	KLC4	kinesin light chain 4	-1.11	-1.01	-1.43	-1.11	-1.01	-1.15	-1.21	-1.43	AW463944			KLC4	kinesin light chain 4	-1	-1.03	1.25	1.05	1.01	1.04	1.03	1.25	AW463944			KLC4	kinesin light chain 4	1.2	1.17	-1.48	1.02	1.2	-1.09	-1.48	AW463944
945	GABARAPL2	gamma-aminobutyric acid (GABA-A) receptor-associated protein-like 2	-1.15	1.01	1.38	1.1	1.03	1.1	-1.08	1.38	AW463945			GABARAPL2	gamma-aminobutyric acid (GABA-A) receptor-associated protein-like 2	-1.03	-1.14	1.19	1.45	1.01	-1.08	-1.14	1.45	AW463945			GABARAPL2	gamma-aminobutyric acid (GABA-A) receptor-associated protein-like 2	1.2	1.34	1.38	-1.05	1.2	1.14	1.38	AW463945
946	OSTF1	osteoclast stimulating factor 1	-1.13	1.07	1.21	1.46	1.27	1.53	1.86	1.86	AW463947			OSTF1	osteoclast stimulating factor 1	1.02	-1.11	1.17	1.61	1.22	1.24	1.99	1.99	AW463947			OSTF1	osteoclast stimulating factor 1	1.02	1.27	1.3	1.19	1.27	1.1	1.3	AW463947
947	Stambp	Stam binding protein	1.17	1.12	1.1	1.11	1.03	1.29	1.19	1.29	AW463948			Stambp	Stam binding protein	1.09	-1.01	1.28	1.4	-1.06	1.21	1.44	1.44	AW463948			Stambp	Stam binding protein	1.23	1.25	1.04	-1	1.26	1.06	1.26	AW463948
948	C1orf128	chromosome 1 open reading frame 128	-1.09	1.09	-1.28	-1.03	1.14	1.01	-1.32	-1.32	AW463950			C1orf128	chromosome 1 open reading frame 128	1.1	1.04	1.12	1.08	1.07	1.05	-1.21	-1.21	AW463950	t60? t240? t480?		C1orf128	chromosome 1 open reading frame 128	-1.04	1.19	-1.17	1.06	1.13	-1.03	1.19	AW463950	t480?
949	AW463956		1.05	1.04	-1.09	-1.27	1.05	1	-1.06	-1.27	AW463956	t480? t720?		AW463956		1.2	1.12	1.03	-1.2	-1.11	1.03	-1.09	1.2	AW463956	t15? t120? t240? t480?		AW463956		-1.03	-1.08	1.01	1.03	1.24	-1.03	1.24	AW463956	t15? t60? t120? t480?
950	CYFIP2	cytoplasmic FMR1 interacting protein 2	1.06	-1.12	1.04	-1.15	-1.27	-1.1	-1.59	-1.59	AW463968	t15?		CYFIP2	cytoplasmic FMR1 interacting protein 2	-1.03	1.24	-1.02	-1.07	-1.08	1.06	-1.07	1.24	AW463968			CYFIP2	cytoplasmic FMR1 interacting protein 2	1.09	-1.14	1.32	1.25	1.04	-1.13	1.32	AW463968
951	MTA1	metastasis associated 1	1.08	-1.04	1.25	-1.18	-1.12	-1.27	-1.13	-1.27	AW463970	t15? t30? t60? t120? t240?		MTA1	metastasis associated 1	-1.12	1.04	1.11	-1.18	-1.02	-1.14	-1.07	-1.18	AW463970	t60?		MTA1	metastasis associated 1	1.21	1.01	1.17	1.1	1.02	-1.11	1.21	AW463970	t60? t120? t240? t480?
952	TMX2		-1.02	1.08	1.14	-1.12	1.11	-1.02	-1.04	1.14	AW463971			TMX2		-1.03	1.05	1.06	-1.04	1.28	1.04	1.03	1.28	AW463971	t60?		TMX2		1.15	1.1	1.22	1.08	-1.1	-1.01	1.22	AW463971	t480?
953	AW463973		1.01	-1.04	-1.17	-1.28	1.07	1.03	-1.03	-1.28	AW463973	t15? t120?		AW463973	Transcribed locus	-1.01	1.07	-1.03	-1.02	1.21	1.12	1.07	1.21	AW463973			AW463973		1.11	-1.01	1.1	-1.01	-1.12	-1.06	-1.12	AW463973	t60?
954	LOC222699		1.03	-1.11	1.01	-1.04	1.06	-1.21	1.01	-1.21	AW463986	t60?		LOC222699		1.07	-1.18	1.27	1.11	-1.09	1.04	1.2	1.27	AW463986	t60? t120? t240? t480?		LOC222699		1.17	1.15	-1.23	-1.03	1.29	-1.14	1.29	AW463986	t30? t60? t120? t480?
955	LOC514257		1.03	1.06	-1.7	-1.1	1.19	-1.05	1.2	-1.7	AW463990			LOC514257		-1.03	1.36	-1.2	1.06	1.3	1.13	-1.1	1.36	AW463990	t480?		LOC514257		1	-1.17	-1.12	1.09	-1.04	-1.12	-1.17	AW463990	t30?
956	PARD3	par-3 partitioning defective 3 homolog (C. elegans)	1.03	-1.41	1.48	1.11	-1.17	-1.27	1.1	1.48	AW464001	t240?		PARD3	par-3 partitioning defective 3 homolog (C. elegans)	-1.16	-1.3	1.3	-1.04	1.08	-1.11	1.42	1.42	AW464001	t15? t60? t120? t240?		PARD3	par-3 partitioning defective 3 homolog (C. elegans)	1.38	-1.01	1.25	1.22	-1.21	-1.13	1.38	AW464001	t30? t60? t120? t240? t480?
957	Med28		-1.27	1.16	-1.02	1.11	1.29	1.09	1.11	1.29	AW464009	t120?		Med28		-1.1	-1.01	-1.07	1.07	1.23	1.05	1.11	1.23	AW464009			Med28		1.04	1.2	1.28	1.11	1.13	1.12	1.28	AW464009
958	LOC162427		1.07	1.1	-1.05	1.03	-1.07	1.06	-1.06	1.1	AW464013			LOC162427		1.07	1.14	1	1.25	-1.05	1.02	1.09	1.25	AW464013			LOC162427		1.08	1.05	1.12	-1.02	1.1	1.01	1.12	AW464013
959	Dhdds	dehydrodolichyl diphosphate synthase	1.08	1.18	-1.38	-1.06	1.14	1.1	1.09	-1.38	AW464015			Dhdds	dehydrodolichyl diphosphate synthase	1.22	1.1	-1.07	1.31	-1.03	1.12	1.12	1.31	AW464015			Dhdds	dehydrodolichyl diphosphate synthase	1.05	1.23	-1.04	-1.15	1.27	-1.01	1.27	AW464015	t480?
960	AW464020		-1.09	-1.12	-1.04	1.05	-1.11	-1.09	1.06	-1.12	AW464020			AW464020		1.13	-1.01	-1.02	1.15	-1.08	1.03	1.12	1.15	AW464020	t60? t120? t720?		AW464020		-1.13	-1.04	-1.03	-1.01	1.15	-1.03	1.15	AW464020	t15? t60? t120? t480?
961	Wbscr27	Williams Beuren syndrome chromosome region 27 (human)	1.08	1.04	-1.32	-1.05	1.08	-1.32	-1.14	-1.32	AW464029	t30?		Wbscr27	Williams Beuren syndrome chromosome region 27 (human)	1.06	1.46	-1.12	-1.04	-1.02	-1.24	1.06	1.46	AW464029			Wbscr27	Williams Beuren syndrome chromosome region 27 (human)	1.19	-1.27	-1.1	1.13	1.27	-1	1.27	AW464029
962	MX1	myxovirus (influenza virus) resistance 1, interferon-inducible protein p78 (mouse)	-1.04	-1.03	1.22	1.23	1.54	1.35	1.7	1.7	AW464030			MX1	myxovirus (influenza virus) resistance 1, interferon-inducible protein p78 (mouse)	1.05	-1.08	1	1.47	1.32	1.27	1.24	1.47	AW464030	t720?		MX1	myxovirus (influenza virus) resistance 1, interferon-inducible protein p78 (mouse)	-1.05	1.09	1.37	1.05	1.3	1.12	1.37	AW464030
963	LOC521637		1.07	-1.1	-1.03	-1.05	1.06	-1.03	-1.2	-1.2	AW464031			LOC521637		1.1	1.11	1.1	1.06	1.03	1.06	1	1.11	AW464031	t15? t120? t240? t480?		LOC521637		1.02	-1.08	-1.03	1.02	1.14	-1.04	1.14	AW464031	t30? t60? t120? t480?
964	AW464033		-1.03	-1.04	1.22	-1.04	-1.01	-1.03	1.23	1.23	AW464033			AW464033		1.14	-1.24	1.14	1.17	1.03	1.04	1.01	-1.24	AW464033			AW464033		-1.02	1.22	1.22	-1.06	1.11	1.04	1.22	AW464033
965	FLJ10154		-1.22	-1.13	1.05	1.08	1.19	1.37	1.07	1.37	AW464042			FLJ10154		-1.04	1.03	1.24	2	1.02	1.31	1.24	2	AW464042			FLJ10154		1.08	1.05	1.12	-1.31	1.39	-1.02	1.39	AW464042
966	Rchy1	ring finger and CHY zinc finger domain containing 1	1.02	1.25	1.16	1.06	1.14	1.18	1.04	1.25	AW464045			Rchy1	ring finger and CHY zinc finger domain containing 1	1.02	1.25	1.12	1.18	1.08	1.08	1.17	1.25	AW464045			Rchy1	ring finger and CHY zinc finger domain containing 1	-1.06	1.07	1.22	1.12	1.14	1.05	1.22	AW464045
967	MGC152014		-1.02	-1.17	-1.06	-1.07	1.02	1.12	1.05	-1.17	AW464049	t480? t720?		MGC152014		1.12	-1.08	-1	-1.05	1.03	1.04	-1.02	1.12	AW464049	t15? t30? t60? t120? t240? t480? t720?		MGC152014		-1.04	-1.01	-1.01	1.05	1.04	1.08	1.08	AW464049	t30? t60? t120? t240? t480?
968	Baz1b	bromodomain adjacent to zinc finger domain, 1B	1.02	1.03	1.08	1.15	1.04	1.08	-1.16	-1.16	AW464050			Baz1b	bromodomain adjacent to zinc finger domain, 1B	-1.04	1.08	1.24	1.49	-1.01	1.09	1.05	1.49	AW464050			Baz1b	bromodomain adjacent to zinc finger domain, 1B	1.15	1.1	1.06	-1.06	1.22	-1.03	1.22	AW464050
969	PPP1R12A	protein phosphatase 1, regulatory (inhibitor) subunit 12A	-1.27	1.32	-1.74	-1.09	1.22	-1.26	-1.19	-1.74	AW464052	t240? t720?		PPP1R12A	protein phosphatase 1, regulatory (inhibitor) subunit 12A	1.07	1.42	-1.08	-1.14	1.27	-1.32	-1.19	1.42	AW464052	t15? t720?		PPP1R12A	protein phosphatase 1, regulatory (inhibitor) subunit 12A	-1.11	1	-1.33	1.25	1.07	1.05	-1.33	AW464052	t15? t480?
970	PRL	prolactin	-1.3	-1.12	1.09	-1.05	-1.06	-1.02	1.03	-1.3	AW464053			PRL	prolactin	-1.01	1.01	1.11	1.04	-1.08	1.02	1.13	1.13	AW464053	t15? t60? t120? t480?		PRL	prolactin	-1.12	-1.07	1	-1.03	1.13	1.04	1.13	AW464053	t15? t60? t120? t480?
971	CFLAR	CASP8 and FADD-like apoptosis regulator	1.06	1.08	-1.23	-1.02	1.17	1.69	1.58	1.69	AW464057			CFLAR	CASP8 and FADD-like apoptosis regulator	1.07	1.18	-1.1	1.48	1.1	1.46	1.15	1.48	AW464057			CFLAR	CASP8 and FADD-like apoptosis regulator	1.04	1.03	1.09	-1.16	1.14	1.17	1.17	AW464057	t60?
972	ANXA11	annexin A11	1.15	1.18	1.28	-1.06	1.06	1.26	-1.1	1.28	AW464058			ANXA11	annexin A11	1.18	1.2	1.2	1.26	1.25	1.29	1.3	1.3	AW464058			ANXA11	annexin A11	1.24	1.15	1.36	1.08	1.05	-1.04	1.36	AW464058
973	LOC538104		-1.18	1.15	-1.34	-1.11	1.22	1.1	1.21	-1.34	AW464059			LOC538104		1.01	1.14	-1.15	1.18	1.07	1.18	-1.12	1.18	AW464059	t60? t720?		LOC538104		-1.08	1.11	1.04	-1.03	1.19	-1.06	1.19	AW464059
974	RPL12	ribosomal protein L12	-1.16	1.29	-1.3	-1.46	1.02	1.15	1.22	-1.46	AW464060			RPL12	ribosomal protein L12	-1.03	1.27	-1.3	-1.84	1.13	-1.01	-1.07	-1.84	AW464060			RPL12	ribosomal protein L12	1.02	1.14	1.37	1.72	1.08	1.25	1.72	AW464060
975	Mrpl45	mitochondrial ribosomal protein L45	1.11	-1.03	1.06	1.28	-1.05	1.04	1.18	1.28	AW464062			Mrpl45	mitochondrial ribosomal protein L45	1.02	1.14	1.06	1.46	-1.05	1.11	1.35	1.46	AW464062			Mrpl45	mitochondrial ribosomal protein L45	-1.01	-1.06	1.04	1.01	1.18	-1.04	1.18	AW464062
976	Cttnbp2nl	CTTNBP2 N-terminal like	-1.09	-1.09	1.13	1.24	1.33	1.27	1.45	1.45	AW464072	t720?		Cttnbp2nl	CTTNBP2 N-terminal like	1.04	1.14	1.1	1.51	1.02	1.3	1.51	1.51	AW464072	t60? t120? t240?		Cttnbp2nl	CTTNBP2 N-terminal like	1.03	-1.07	1.17	-1.04	1.44	-1.01	1.44	AW464072	t120? t240?
977	LOC540056		1.11	-1.1	-1.02	-1.14	1.01	1.14	1.12	1.14	AW464085			LOC540056		1.33	1.11	1.18	1.05	1.07	1.16	1.1	1.33	AW464085			LOC540056		-1.08	1.02	1.03	1.11	1.16	1.06	1.16	AW464085
978	TMEM127		1.19	-1.25	1.66	-1.22	1.16	1.24	-1.34	1.66	AW464089			TMEM127		-1.03	-1.19	1.24	1.21	1.35	1.22	1.06	1.35	AW464089			TMEM127		1.22	1.15	1.66	-1.1	1.05	1.05	1.66	AW464089
979	Bt.1751		-1.07	-1.04	1.17	1.01	1.08	-1.06	-1.03	1.17	AW464098	t60? t720?		Bt.1751		-1.05	-1.12	1.06	1.12	-1.05	-1	1.12	1.12	AW464098	t15? t30? t60? t120? t240? t480?		Bt.1751		1.14	1.12	1.08	-1.05	1.22	1.03	1.22	AW464098	t60? t120? t480?
980	LOC616372		-1.11	1.14	1.18	-1.06	1.32	1.37	1.37	1.37	AW464100			LOC616372		-1.11	1.13	1.09	1.16	1.16	1.29	1.5	1.5	AW464100			LOC616372		1.16	1.15	1.22	1.05	1.23	1.04	1.23	AW464100
981	HAT1	histone acetyltransferase 1	-1.14	1.14	1.34	-1.01	1.13	1.37	-1.03	1.37	AW464112			HAT1	histone acetyltransferase 1	-1.09	1.22	1.04	1.11	1.1	1.2	1.06	1.22	AW464112			HAT1	histone acetyltransferase 1	1.16	1.04	1.45	1.15	1.09	1.12	1.45	AW464112
982	Leng1	leukocyte receptor cluster (LRC) member 1	-1.05	-1.34	-1	-1.02	-1.56	-1.38	1.21	-1.56	AW464116	t15?		Leng1	leukocyte receptor cluster (LRC) member 1	-1.21	-1.05	-1.34	1.11	-1.1	-1.19	1.67	1.67	AW464116			Leng1	leukocyte receptor cluster (LRC) member 1	1.3	-1.12	1.35	-1.04	-1.18	-1.1	1.35	AW464116	t120?
983	DUSP3	dual specificity phosphatase 3	1.03	1.08	-1.2	-1.17	-1.04	-1.27	-1.37	-1.37	AW464118	t15? t240?		DUSP3	dual specificity phosphatase 3	1.06	1.06	1.16	-1.02	1.3	-1.15	-1.27	1.3	AW464118	t120?		DUSP3	dual specificity phosphatase 3	1.09	1.16	-1.17	1.02	-1.29	-1.05	-1.29	AW464118	t60? t480?
984	IL1RN	interleukin 1 receptor antagonist	1.11	-1.06	1.1	1.25	2.28	5.3	7.52	7.52	AW464123	t60? t720?		IL1RN	interleukin 1 receptor antagonist	1.03	1.02	1.14	1.3	1.39	1.72	1.82	1.82	AW464123	t15? t30? t60? t120? t240?		IL1RN	interleukin 1 receptor antagonist	1.1	1.02	1.06	1.37	1.66	2.75	2.75	AW464123	t30? t60? t120?
985	ALDH3B1	aldehyde dehydrogenase 3 family, member B1	1.21	-1.15	1.13	-1.16	1.2	1.21	1.03	1.21	AW464140			ALDH3B1	aldehyde dehydrogenase 3 family, member B1	1.15	1.08	1.07	-1.05	1.33	1.14	1.15	1.33	AW464140			ALDH3B1	aldehyde dehydrogenase 3 family, member B1	1.23	-1	1.3	1.21	1.06	1.1	1.3	AW464140
986	LOC645781		1.17	1.57	-1.25	-1.54	-1.16	-1.34	-1.48	1.57	AW464145	t15?		LOC645781		1.4	1.41	-1.07	-1.93	-1.67	-1.2	-1.41	-1.93	AW464145			LOC645781		1.08	1.38	1.07	1.68	1.74	-1.08	1.74	AW464145
987	LOC727726		1.04	1.05	-1.01	1.4	-1	1.08	1.07	1.4	AW464146			LOC727726		-1.02	-1.02	1.12	1.88	1.02	1.23	1.45	1.88	AW464146			LOC727726		1.1	1.32	1.07	-1.02	1.21	-1.05	1.32	AW464146
988	Fnbp1l		-1.02	1.09	1.01	-1.21	-1.05	1.06	1.1	-1.21	AW464149	t720?		Fnbp1l		1	1.17	1.03	-1.06	1.21	1.02	1.13	1.21	AW464149	t60? t120? t240? t480?		Fnbp1l		1.03	1.01	1.07	-1.02	-1.22	1.07	-1.22	AW464149	t15? t30? t60? t120? t480?
989	Tep1	telomerase associated protein 1	1.1	1.24	-1.14	-1.03	-1.08	-1.21	-1.21	1.24	AW464150	t720?		Tep1	telomerase associated protein 1	1.32	1.22	-1.01	-1.08	-1.02	-1.13	1.2	1.32	AW464150	t15? t60? t240? t480?		Tep1	telomerase associated protein 1	1.04	1.15	-1.01	1.13	1.04	-1.01	1.15	AW464150	t60? t120? t480?
990	Smarcal1	Swi/SNF related matrix associated, actin dependent regulator of chromatin, subfamily a-like 1	-1.06	-1.34	-1.58	-1.52	1.01	-1.07	1.21	-1.58	AW464155	t15? t30?		Smarcal1	Swi/SNF related matrix associated, actin dependent regulator of chromatin, subfamily a-like 1	1.12	1.23	-1.11	-1.58	-1.04	-1.21	-1.1	-1.58	AW464155			Smarcal1	Swi/SNF related matrix associated, actin dependent regulator of chromatin, subfamily a-like 1	1.1	-1.39	-1.2	1.27	1.28	1.11	-1.39	AW464155
991	COPS4	COP9 (constitutive photomorphogenic) homolog, subunit 4 (Arabidopsis thaliana)	1.23	-1.14	1.45	-1.03	-1.09	1.08	1.01	1.45	AW464161			COPS4	COP9 (constitutive photomorphogenic) homolog, subunit 4 (Arabidopsis thaliana)	1.21	-1.03	1.26	1.07	1.22	1.11	1.15	1.26	AW464161	t15? t60? t480?		COPS4	COP9 (constitutive photomorphogenic) homolog, subunit 4 (Arabidopsis thaliana)	1.29	1.01	1.27	1.07	-1.2	-1.04	1.29	AW464161	t60? t120? t480?
992	HSD3B1	hydroxy-delta-5-steroid dehydrogenase, 3 beta- and steroid delta-isomerase 1	1.08	1.24	-1.39	-1.03	1.42	-1.52	-1.9	-1.9	AW464162	t15? t30? t60? t120? t240? t480? t720?		HSD3B1	hydroxy-delta-5-steroid dehydrogenase, 3 beta- and steroid delta-isomerase 1	1.45	-1.05	1.05	-1.16	-1.07	-1.92	1.23	-1.92	AW464162	t30? t60? t120? t240? t720?		HSD3B1	hydroxy-delta-5-steroid dehydrogenase, 3 beta- and steroid delta-isomerase 1	-1.06	1.5	-1.19	1.29	1.99	1.23	1.99	AW464162	t15? t30? t60? t240? t480?
993	LOC509642		1.2	1.01	-1.45	1.02	1.27	1.04	-1.77	-1.77	AW464181			LOC509642		1.39	1.31	-1.02	-1	1.37	-1.06	-1.56	-1.56	AW464181			LOC509642		-1.11	-1.12	-1.31	1.22	1.04	1.17	-1.31	AW464181
994	LOC508133		-1.02	1.02	-1.02	1.31	2.09	2.24	2.33	2.33	AW464191	t15?		LOC508133		1.34	1.26	1.36	1.49	1.77	1.3	1.24	1.77	AW464191			LOC508133		-1.27	-1.08	-1.05	1.14	1.25	1.65	1.65	AW464191
995	ANXA1	annexin A1	-1.11	1.03	1.04	-1.14	1.3	1.76	2.47	2.47	AW464193	t15? t30? t60? t120? t240?		ANXA1	annexin A1	1.36	1.33	1.19	-1.56	1.32	-1.11	-1.02	-1.56	AW464193	t30? t120?		ANXA1	annexin A1	-1.02	-1.15	1.07	1.74	1.12	1.77	1.77	AW464193	t15?
996	PAN3		-1.02	1.03	-1.37	1.02	1.23	1.05	-1.03	-1.37	AW464194			PAN3		1.21	1.17	1.11	1.22	1.07	1.12	-1.19	1.22	AW464194			PAN3		-1.15	-1.03	-1.15	1.06	1.19	-1.09	1.19	AW464194
997	MGC142622		1.2	-1.03	1.04	1.23	-1	-1.01	1.5	1.5	AW464198			MGC142622		-1.14	1.19	-1.16	1.27	1.2	-1.13	1.83	1.83	AW464198	t720?		MGC142622		1.29	-1.04	1.21	1.09	-1.05	1.16	1.29	AW464198
998	PPP3CC	protein phosphatase 3 (formerly 2B), catalytic subunit, gamma isoform	-1.04	1.03	1.15	1.05	-1.18	-1.09	-1.19	-1.19	AW464202	t60? t720?		PPP3CC	protein phosphatase 3 (formerly 2B), catalytic subunit, gamma isoform	-1.07	1.29	1.19	1.04	-1.12	1.06	-1.05	1.29	AW464202	t60? t120? t240? t480?		PPP3CC	protein phosphatase 3 (formerly 2B), catalytic subunit, gamma isoform	1.12	-1.12	1.05	1.1	-1.01	-1.17	-1.17	AW464202	t60? t120? t480?
999	Rabl3	RAB, member of RAS oncogene family-like 3	-1.09	1.07	1.09	1.01	-1.01	1.02	-1.12	-1.12	AW464204			Rabl3	RAB, member of RAS oncogene family-like 3	-1.04	1.04	1.07	1.32	-1	1.12	1.06	1.32	AW464204	t120?		Rabl3	RAB, member of RAS oncogene family-like 3	1.01	1.16	1.17	-1.14	1.06	-1.07	1.17	AW464204	t120?
1000	Cct2	chaperonin subunit 2 (beta)	-1.2	-1.05	1.16	1.09	-1.08	-1.15	1.07	-1.2	AW464207	t15? t30? t60? t120? t240?		Cct2	chaperonin subunit 2 (beta)	-1.17	1.09	1.14	-1	1.25	-1.05	-1.1	1.25	AW464207	t15? t120?		Cct2	chaperonin subunit 2 (beta)	-1.15	-1.02	1.13	1.28	-1.22	-1.17	1.28	AW464207	t480?
1001	DPP4	dipeptidyl-peptidase 4 (CD26, adenosine deaminase complexing protein 2)	-1.12	1.85	-1.54	-1.15	-1.52	-1.33	-2.58	-2.58	AW464210			DPP4	dipeptidyl-peptidase 4 (CD26, adenosine deaminase complexing protein 2)	1.27	1.67	-1.13	1.31	-1.27	-1.08	1.08	1.67	AW464210	t720?		DPP4	dipeptidyl-peptidase 4 (CD26, adenosine deaminase complexing protein 2)	1.07	1.26	-1.04	-1.05	-1.04	-1.12	1.26	AW464210
1002	MGC13017		-1.08	1.2	1.17	1.16	-1.01	1.01	-1.33	-1.33	AW464222			MGC13017		-1.05	1.13	1.17	1.11	1.13	1	-1.23	-1.23	AW464222			MGC13017		-1.01	1.15	1.18	1.23	-1.04	-1.05	1.23	AW464222
1003	Ddx19b		-1	-1.06	1.36	-1	-1.08	1.14	1.2	1.36	AW464225	t15? t30? t60? t720?		Ddx19b		-1.15	1.17	1.15	1	-1.19	-1.01	1.19	1.19	AW464225	t60? t120? t240?		Ddx19b		1.16	-1.09	1.25	1.15	1.25	1.15	1.25	AW464225	t15? t60? t120? t240?
1004	AW464231		1.09	1.07	-1.04	-1.01	-1.07	-1.09	-1.08	1.09	AW464231	t15? t30? t60? t120? t240?		AW464231	Transcribed locus	-1.12	1.13	-1.18	-1.05	1.11	-1.08	1.18	1.18	AW464231	t15? t240? t480?		AW464231		1.19	1	1.14	1.17	-1.1	1.01	1.19	AW464231	t15? t60? t120? t240? t480?
1005	C2orf28		-1.17	-1.06	1.1	-1	-1.02	1.02	-1.02	-1.17	AW464232	t720?		C2orf28		1.06	1.07	1.03	1.08	1.01	1.1	-1.25	-1.25	AW464232	t15? t60? t120? t240? t480? t720?		C2orf28		1.02	-1.03	1.07	-1.05	1.02	1.05	1.07	AW464232	t15? t30? t60? t120? t240? t480?
1006	BMP7	bone morphogenetic protein 7 (osteogenic protein 1)	1.06	-1.05	1.1	1.05	-1.08	-1.13	1.04	-1.13	AW464234			BMP7	bone morphogenetic protein 7 (osteogenic protein 1)	1.01	-1	1.03	1.01	1.07	-1.08	1.08	1.08	AW464234	t15? t120? t240? t480?		BMP7	bone morphogenetic protein 7 (osteogenic protein 1)	-1.01	1.06	1.1	1.19	-1.02	-1.03	1.19	AW464234	t15? t60? t120? t480?
1007	Bt.10444		-1.2	-1.12	1.24	-1.01	-1.04	1.18	1.1	1.24	AW464239	t720?		Bt.10444		-1.18	1.07	-1.03	1.07	1.13	1.11	1.2	1.2	AW464239	t15? t30? t60? t120? t240? t480? t720?		Bt.10444		1.22	-1.13	1.22	-1.06	-1.1	1.09	1.22	AW464239	t15? t30? t60? t120? t240? t480?
1008	AW464240		-1.03	1.19	-1.23	-1.19	1.26	-1.2	-1.35	-1.35	AW464240	t720?		AW464240		-1.02	1.04	-1.12	-1.13	1.17	-1.07	-1.16	1.17	AW464240	t15? t30? t60? t120? t240? t480?		AW464240		1.05	1.27	1	1.05	1.25	-1.01	1.27	AW464240	t30? t60? t120? t240? t480?
1009	TOPBP1	topoisomerase (DNA) II binding protein 1	-1.07	-1	1.22	-1.1	-1.16	-1.29	-1.14	-1.29	AW464245			TOPBP1	topoisomerase (DNA) II binding protein 1	-1.14	1.42	1.19	-1.17	1.03	-1.14	-1.17	1.42	AW464245	t15? t240? t480? t720?		TOPBP1	topoisomerase (DNA) II binding protein 1	1.11	-1.27	1.13	1.29	-1.07	-1.14	1.29	AW464245	t60? t240? t480?
1010	LOC389895		1.51	-1.1	1.2	-1.03	1.01	1.22	1.23	1.51	AW464246			LOC389895		1.63	1.08	1.11	1.26	1.06	1.26	1.56	1.63	AW464246			LOC389895		1.16	1.03	1.29	1.03	1.15	1.01	1.29	AW464246
1011	Rc3h2		-1.11	1.17	-1.27	-1.1	1.12	1.07	-1.02	-1.27	AW464250	t480?		Rc3h2		1.03	1.1	-1.01	1.03	1.06	1.11	-1.11	1.11	AW464250	t15? t60? t120? t240? t480? t720?		Rc3h2		-1.05	1.1	-1.1	1.02	1.08	1	1.1	AW464250	t60? t120? t480?
1012	LOC504773		-1.13	1.03	-1.55	-1.07	-1.04	1.37	1.25	-1.55	AW464252			LOC504773		1.04	1.2	-1.27	1.85	1.4	1.24	1.49	1.85	AW464252			LOC504773		-1.07	1.06	1.01	-1.48	-1.2	1.14	-1.48	AW464252
1013	Larp5	La ribonucleoprotein domain family, member 5	1.23	-1.18	1.25	1.27	-1.56	-1.05	1.55	-1.56	AW464254	t15?		Larp5	La ribonucleoprotein domain family, member 5	-1.53	1.21	1.11	1.35	1.05	-1.22	2.25	2.25	AW464254			Larp5	La ribonucleoprotein domain family, member 5	1.7	-1.17	1.29	1.15	-1.35	1.2	1.7	AW464254
1014	SLC15A1	solute carrier family 15 (oligopeptide transporter), member 1	-1.34	1.13	-1.14	1.02	-1.53	-1.92	-2.89	-2.89	AW464260	t720?		SLC15A1	solute carrier family 15 (oligopeptide transporter), member 1	-1.34	1.22	-1.01	1.12	-1.18	-1.3	-1.85	-1.85	AW464260	t480?		SLC15A1	solute carrier family 15 (oligopeptide transporter), member 1	1.29	1.04	-1	1.01	-1.12	-1.36	-1.36	AW464260	t60? t120? t240? t480?
1015	Nbeal1		1.06	-1.17	-1.31	-1.23	1.13	1.15	-1.22	-1.31	AW464262			Nbeal1		1.26	1.11	1.15	1.23	1.3	1.38	1.14	1.38	AW464262			Nbeal1		-1.1	-1.07	-1.23	-1.12	1.06	-1.16	-1.23	AW464262
1016	C1qtnf1	C1q and tumor necrosis factor related protein 1	1.11	-1.17	-1.24	-1.14	1.14	1.04	-1.04	-1.24	AW464264	t15? t240?		C1qtnf1	C1q and tumor necrosis factor related protein 1	1.46	-1.02	1.03	-1.02	1.23	1.04	-1.07	1.46	AW464264	t15? t480?		C1qtnf1	C1q and tumor necrosis factor related protein 1	-1.08	-1.1	-1.1	1.04	-1.01	1.06	-1.1	AW464264	t480?
1017	Stau1	staufen, RNA binding protein, homolog 1 (Drosophila)	-1.17	1.07	-1.17	1.16	1.36	1.02	-1.08	1.36	AW464265			Stau1	staufen, RNA binding protein, homolog 1 (Drosophila)	1.12	1.02	1.46	1.57	1.24	1.03	1.07	1.57	AW464265			Stau1	staufen, RNA binding protein, homolog 1 (Drosophila)	1.05	1.28	-1.36	-1.01	1.33	1.03	-1.36	AW464265
1018	IHPK2		-1.04	1.03	-1.36	1.01	1.18	1.18	1.04	-1.36	AW464276			IHPK2		1.16	1.12	-1.01	1.28	1.1	1.18	-1.02	1.28	AW464276			IHPK2		-1.06	1.05	-1.04	-1.01	1.14	1.01	1.14	AW464276
1019	JOSD1	Josephin domain containing 1	-1.03	-1.09	1.09	-1.01	1.06	1.02	1.16	1.16	AW464279	t240?		JOSD1	Josephin domain containing 1	1.02	-1.03	1.17	1.14	1.09	-1.01	1.16	1.17	AW464279	t120?		JOSD1	Josephin domain containing 1	1.01	1.06	1.05	-1.03	1.1	1.05	1.1	AW464279	t120? t240? t480?
1020	FDX1	ferredoxin 1	1.06	-1.25	1.13	1.23	-1.09	-1.03	-1.1	-1.25	AW464286			FDX1	ferredoxin 1	-1.05	-1.01	1.21	1.4	1.06	1.08	-1.03	1.4	AW464286			FDX1	ferredoxin 1	1.15	-1.04	1.12	1.11	-1.01	-1.09	1.15	AW464286
1021	RGAG4		1.24	-1.19	2.23	1.34	-1.03	1.16	1.18	2.23	AW464288			RGAG4		-1.03	1.11	1.23	1.22	1.22	1.27	1.58	1.58	AW464288			RGAG4		1.27	-1.17	1.83	1.21	-1.14	-1.02	1.83	AW464288
1022	TNFRSF6B	tumor necrosis factor receptor superfamily, member 6b, decoy	1.04	-1.12	1.54	1.12	-1.09	1.28	2.13	2.13	AW464298	t120?		TNFRSF6B	tumor necrosis factor receptor superfamily, member 6b, decoy	-1.47	1.14	1.11	1.16	1.01	1.37	1.4	-1.47	AW464298			TNFRSF6B	tumor necrosis factor receptor superfamily, member 6b, decoy	1.54	-1.17	1.34	-1	1.03	-1	1.54	AW464298	t480?
1023	Rab4b	RAB4B, member RAS oncogene family	-1.01	1.12	-1.43	-1.54	1.06	-1.15	-1.33	-1.54	AW464303	t15? t30? t120? t240? t480?		Rab4b	RAB4B, member RAS oncogene family	1.21	1.6	-1.05	-1.57	1.22	-1.15	-1.28	1.6	AW464303	t240? t480?		Rab4b	RAB4B, member RAS oncogene family	1.03	-1.33	-1.09	1.32	-1.1	1.04	-1.33	AW464303	t30? t480?
1024	DRB1		-1.26	1.36	-1.42	1.03	1.12	1.06	-1.03	-1.42	AW464306			DRB1		1.25	1.25	-1.12	1.28	-1.05	1.23	-1.48	-1.48	AW464306			DRB1		-1.18	1.25	1.06	1.16	1.38	-1.12	1.38	AW464306
1025	BCL2L1	BCL2-like 1	1.04	1.03	-1.02	-1.26	-1.07	1.07	1.12	-1.26	AW464309	t15? t30? t60? t120? t240? t480? t720?		BCL2L1	BCL2-like 1	-1.24	1.25	-1.13	-1.17	1.05	1.06	-1.1	1.25	AW464309	t15? t30? t60? t240? t480? t720?		BCL2L1	BCL2-like 1	1.44	-1.25	1.07	1.02	-1.01	1.04	1.44	AW464309	t30? t60? t120? t240? t480?
1026	Snx6	sorting nexin 6	-1.02	1.17	1.17	1.01	1.17	1.12	-1.12	1.17	AW464321			Snx6	sorting nexin 6	-1	1.09	1.16	1.39	-1.03	1.32	1.17	1.39	AW464321			Snx6	sorting nexin 6	1.27	1.21	1.25	-1.07	1.39	-1.21	1.39	AW464321
1027	IL13RA1	interleukin 13 receptor, alpha 1	-1.13	1.25	-1.28	-1.3	1.26	1.08	1.5	1.5	AW464322			IL13RA1	interleukin 13 receptor, alpha 1	-1.07	1.28	-1.14	-1.04	1.32	1.08	-1.11	1.32	AW464322	t60? t480?		IL13RA1	interleukin 13 receptor, alpha 1	-1.04	1.06	1.07	1.05	-1.02	1.06	1.07	AW464322
1028	ARF5	ADP-ribosylation factor 5	1.09	1.1	-1.2	-1.18	1.36	1.23	-1.07	1.36	AW464330			ARF5	ADP-ribosylation factor 5	1.29	1.24	-1.06	-1.11	1.38	1.17	1.01	1.38	AW464330			ARF5	ADP-ribosylation factor 5	1.06	1.08	1.1	1.26	1.19	1.11	1.26	AW464330
1029	RHOA	ras homolog gene family, member A	-1.01	1.09	1.83	1.26	1.02	1.18	1.26	1.83	AW464331			RHOA	ras homolog gene family, member A	-1.25	1.22	1.36	1.41	1.21	1.19	1.57	1.57	AW464331			RHOA	ras homolog gene family, member A	1.4	1.1	1.7	1.22	1.03	1.04	1.7	AW464331
1030	PPP2R5C	protein phosphatase 2, regulatory subunit B', gamma isoform	-1.22	1.23	-1.4	-1.19	1.05	1.01	-1.2	-1.4	AW464337			PPP2R5C	protein phosphatase 2, regulatory subunit B', gamma isoform	1.25	1.2	-1.13	1.05	-1.02	-1	-1.44	-1.44	AW464337	t240? t720?		PPP2R5C	protein phosphatase 2, regulatory subunit B', gamma isoform	-1.21	1.13	1.01	1.08	1.19	1.07	-1.21	AW464337
1031	LOC509593		1.31	-1.23	1.74	1.16	-1.16	1.14	-1.2	1.74	AW464347			LOC509593		1.28	-1.16	1.26	1.41	1.15	1.35	1.19	1.41	AW464347			LOC509593		1.31	1.06	1.53	-1.01	-1.1	-1.08	1.53	AW464347
1032	ANKRD55		-1.17	-1.02	1.17	-1.09	-1.2	1.08	1.05	-1.2	AW464350	t720?		ANKRD55		-1.38	1.1	-1.16	1.05	-1.02	1.2	1.16	-1.38	AW464350	t15? t240? t480?		ANKRD55		1.29	-1.16	1.28	-1.05	-1.09	-1.04	1.29	AW464350	t30? t60? t120? t240? t480?
1033	Fbxo32	F-box protein 32	1.07	-1.07	1.17	1.06	-1.2	-1.12	1.17	-1.2	AW464353	t60? t240? t480? t720?		Fbxo32	F-box protein 32	1.07	-1.06	1.15	-1.01	-1.01	-1.04	1.16	1.16	AW464353	t15? t60? t120? t240? t480?		Fbxo32	F-box protein 32	1.11	1.02	1.07	1.14	-1.05	1.01	1.14	AW464353	t30? t60? t120? t480?
1034	PLAT	plasminogen activator, tissue	1.11	-1.43	1.99	1.64	1.25	1.79	2.03	2.03	AW464360	t60?		PLAT	plasminogen activator, tissue	1.06	-1.03	1.57	2	1.33	1.69	1.52	2	AW464360	t60? t240?		PLAT	plasminogen activator, tissue	1.06	-1.17	1.44	1	1.1	1.08	1.44	AW464360	t240?
1035	RP2		-1.26	1.05	1.04	-1.01	-1.04	1.06	1.14	-1.26	AW464362	t720?		RP2		1.02	-1.01	1.03	1.13	-1.13	1.06	1.2	1.2	AW464362	t15? t30? t60? t120? t240? t480? t720?		RP2		-1.02	1.26	1.09	-1.1	1.18	1.06	1.26	AW464362	t15? t30? t60? t120? t240? t480?
1036	Nagk	N-acetylglucosamine kinase	1.11	1.22	-1.18	1.61	-1.22	-1.07	1.05	1.61	AW464363			Nagk	N-acetylglucosamine kinase	1.46	1.42	1.17	1.69	-1.11	-1.18	1.49	1.69	AW464363			Nagk	N-acetylglucosamine kinase	-1.03	1.07	-1.15	1.28	1.1	1.14	1.28	AW464363
1037	PPP1R9B		1.02	1.09	-1.17	1.23	1.38	-1.06	-1.41	-1.41	AW464370			PPP1R9B		1.09	-1.02	1.29	1.47	1.23	1.02	-1.1	1.47	AW464370			PPP1R9B		1.26	1.36	-1.13	1.11	1.3	-1.04	1.36	AW464370
1038	Pdcd7	programmed cell death 7	1.26	-1.12	1.42	1.15	-1.06	1.12	-1.09	1.42	AW464391			Pdcd7	programmed cell death 7	1.02	1.02	1.03	1.07	1.08	1.16	1.08	1.16	AW464391	t60?		Pdcd7	programmed cell death 7	1.24	-1.05	1.45	1.21	-1.03	1	1.45	AW464391
1039	HBM		1.14	1.17	-1.28	-1.31	1.22	1.02	-1.29	-1.31	AW464392			HBM		1.55	1.24	-1.1	-1.33	1.43	-1.02	-1.17	1.55	AW464392			HBM		-1.02	1.16	1.05	1.36	1.04	1.08	1.36	AW464392
1040	Tmcc1		1.04	-1.16	1.13	1.12	1.04	-1.26	1.09	-1.26	AW464396			Tmcc1		-1.14	-1.06	-1.03	-1.09	1.03	-1.21	1.35	1.35	AW464396	t15? t120?		Tmcc1		1.12	-1.04	1.21	1.36	1.12	-1.04	1.36	AW464396	t120? t480?
1041	DSC2	desmocollin 2	1.18	1.03	1.22	1.08	-1.11	1.26	1.18	1.26	AW464398			DSC2	desmocollin 2	1.03	1.18	-1.01	1.06	1.23	1.08	1.26	1.26	AW464398	t15? t60?		DSC2	desmocollin 2	1.13	-1.02	1.3	1.14	-1.26	1.16	1.3	AW464398	t60? t120? t480?
1042	C13orf24		1.01	-1.01	1.1	1	1	-1.04	1.06	1.1	AW464399	t15? t30? t240? t480? t720?		C13orf24		-1.03	1.23	-1.04	-1.04	1.11	1.05	1.18	1.23	AW464399	t15? t30? t60? t120? t240? t480? t720?		C13orf24		1.13	-1.09	1.13	1.05	1.01	1.02	1.13	AW464399	t15? t30? t60? t120? t240? t480?
1043	Lrrfip1	leucine rich repeat (in FLII) interacting protein 1	-1.11	-1.31	1.14	-1.12	-1.12	1.05	1.22	-1.31	AW464400			Lrrfip1	leucine rich repeat (in FLII) interacting protein 1	-1.45	1.08	-1.18	-1.06	1.14	1.06	1.21	-1.45	AW464400			Lrrfip1	leucine rich repeat (in FLII) interacting protein 1	1.4	-1.18	1.35	1.06	-1.21	1.04	1.4	AW464400	t60?
1044	LOC522840		1.03	-1.21	1.15	-1.4	1.13	1.43	-1.13	1.43	AW464403			LOC522840		1.23	-1.06	-1.03	-1.29	1.36	1.44	1.02	1.44	AW464403			LOC522840		-1.01	1.05	1.45	1.16	-1.09	1.07	1.45	AW464403
1045	PFDN6		-1.17	-1.12	1.22	-1.39	-1.25	1.19	1.53	1.53	AW464404	t15? t30?		PFDN6		-1.22	1.19	-1.26	-1.43	1.04	1.28	1.15	-1.43	AW464404	t15?		PFDN6		1.1	-1.27	1.65	1.24	-1.22	-1.04	1.65	AW464404
1046	Npdc1	neural proliferation, differentiation and control gene 1	-1.11	-1.04	1.27	-1.05	-1.03	-1.28	-1.01	-1.28	AW464411	t60? t120? t240? t480? t720?		Npdc1	neural proliferation, differentiation and control gene 1	-1.06	1.07	1.2	-1.07	1.11	-1.11	-1.06	1.2	AW464411	t15? t30? t60? t120? t240? t480? t720?		Npdc1	neural proliferation, differentiation and control gene 1	1.18	-1	1.08	1.1	1.03	-1.01	1.18	AW464411	t15? t30? t60? t120? t240? t480?
1047	CCDC47	coiled-coil domain containing 47	-1.25	-1.09	1.35	1.26	1.07	1.06	-1.15	1.35	AW464413			CCDC47	coiled-coil domain containing 47	-1.13	1.03	1.29	1.56	-1.04	1.12	1.04	1.56	AW464413			CCDC47	coiled-coil domain containing 47	1.04	1.03	1.24	-1.03	1.27	-1.05	1.27	AW464413
1048	Ncaph		1.03	-1.11	1.83	1.04	-1.15	-1.09	1.06	1.83	AW464415	t15? t60?		Ncaph		-1.22	-1.05	1.24	-1.08	1.17	1.05	1.14	1.24	AW464415	t15? t60?		Ncaph		1.35	1.06	1.57	1.3	-1.19	-1.16	1.57	AW464415	t60? t480?
1049	Jtb	jumping translocation breakpoint	1.07	1.14	1.13	1.03	1.07	1.1	-1.07	1.14	AW464425			Jtb	jumping translocation breakpoint	-1.02	-1.02	1.01	1.19	1.04	1.04	1.08	1.19	AW464425	t60? t120? t240? t480?		Jtb	jumping translocation breakpoint	1.2	1.18	1.18	-1.09	1.07	1.04	1.2	AW464425	t60? t120? t480?
1050	Commd9	COMM domain containing 9	1.11	-1.23	1.15	1.03	1.04	1.21	1.07	-1.23	AW464439			Commd9	COMM domain containing 9	-1.07	1.06	1.14	1.31	1.15	1.32	1.4	1.4	AW464439			Commd9	COMM domain containing 9	1.41	-1.07	1.26	1.05	1.09	-1.05	1.41	AW464439
1051	Slc25a3	solute carrier family 25 (mitochondrial carrier, phosphate carrier), member 3	1.12	-1.04	1.37	1.4	1.16	1.06	-1	1.4	AW464441			Slc25a3	solute carrier family 25 (mitochondrial carrier, phosphate carrier), member 3	1.11	1.01	1.33	1.91	1.25	1.01	1.29	1.91	AW464441			Slc25a3	solute carrier family 25 (mitochondrial carrier, phosphate carrier), member 3	1.06	1.15	1.29	-1.01	1.13	1	1.29	AW464441
1052	HMGCL	3-hydroxymethyl-3-methylglutaryl-Coenzyme A lyase (hydroxymethylglutaricaciduria)	1.02	-1.02	-1.26	-1.28	-1.04	-1.18	-1.3	-1.3	AW464447	t15? t240? t480?		HMGCL	3-hydroxymethyl-3-methylglutaryl-Coenzyme A lyase (hydroxymethylglutaricaciduria)	1.13	1.13	-1.02	-1.26	-1.05	-1.16	-1.24	-1.26	AW464447	t15? t240? t480?		HMGCL	3-hydroxymethyl-3-methylglutaryl-Coenzyme A lyase (hydroxymethylglutaricaciduria)	1.11	-1.06	-1.11	1.16	1.08	1.03	1.16	AW464447	t30? t60? t120? t480?
1053	RAB37	RAB37, member RAS oncogene family	1.04	-1.04	-1.21	-1.27	1.11	1.12	1.06	-1.27	AW464449			RAB37	RAB37, member RAS oncogene family	1.07	1.09	-1.18	-1.22	1.13	1.1	-1.16	-1.22	AW464449	t480?		RAB37	RAB37, member RAS oncogene family	1	-1.08	1.08	1.13	1.06	1.08	1.13	AW464449
1054	LOC525332		1.02	-1.08	1.22	-1.05	1.07	-1.01	1.08	1.22	AW464460	t60? t720?		LOC525332		1.04	-1.04	1.04	1.03	1.05	1.05	1.18	1.18	AW464460	t15? t30? t60? t120? t240? t480?		LOC525332		1.09	1.06	1.18	-1	1.1	1.01	1.18	AW464460	t30? t60? t120? t240? t480?
1055	SFT2D2		-1.69	1.4	-1.37	-1.13	1.29	1.02	-1.73	-1.73	AW464466			SFT2D2		-1.12	1.45	1.05	1.1	1.27	-1.04	-1.51	-1.51	AW464466			SFT2D2		-1.21	1.13	-1.11	1.18	1.18	1.01	-1.21	AW464466
1056	KIAA0251		1.18	-1.14	-1.46	-1.4	1.33	1.03	-1.76	-1.76	AW464471			KIAA0251		1.59	1.39	1.08	-1.31	1.5	-1.13	-1.21	1.59	AW464471			KIAA0251		-1.03	-1.29	-1.26	1.25	1.05	1.21	-1.29	AW464471
1057	Mfge8	milk fat globule-EGF factor 8 protein	1.09	-1.07	1.24	1.37	-1.04	1.12	1.1	1.37	AW464504			Mfge8	milk fat globule-EGF factor 8 protein	1.23	-1.14	1.42	1.1	-1.03	1.09	1.25	1.42	AW464504	t60? t120?		Mfge8	milk fat globule-EGF factor 8 protein	-1.05	1.11	1.03	1.46	1.24	1.08	1.46	AW464504
1058	Heca		-1.08	1.08	-1.13	-1.07	-1.04	1.08	-1.35	-1.35	AW464507			Heca		1.13	1.07	1.23	1.17	-1.2	1.09	-1.02	1.23	AW464507			Heca		-1.01	1.15	-1.14	-1	1.35	1.01	1.35	AW464507
1059	Calml4	calmodulin-like 4	1.07	1.22	-1.26	-1.35	1.03	1.21	-1.14	-1.35	AW464513	t720?		Calml4	calmodulin-like 4	1.04	1.19	-1.3	-1.32	1.35	1.11	1.36	1.36	AW464513			Calml4	calmodulin-like 4	1.05	1.12	1.26	1.32	-1.22	1.11	1.32	AW464513	t60?
1060	LRP2	low density lipoprotein-related protein 2	1.04	-1.06	1.03	-1.18	1.13	-1.01	1.08	-1.18	AW464520			LRP2	low density lipoprotein-related protein 2	1.08	-1.02	1.01	1.1	1.02	1.02	1.21	1.21	AW464520	t60? t120? t240? t480?		LRP2	low density lipoprotein-related protein 2	-1	-1.04	1.09	-1.19	1.15	1.02	-1.19	AW464520	t120? t480?
1061	GPD1L	glycerol-3-phosphate dehydrogenase 1-like (EC:1.1.1.8)	-1.19	1.01	-1.01	1.06	-1.16	-1.27	-1.51	-1.51	AW464522			GPD1L	glycerol-3-phosphate dehydrogenase 1-like (EC:1.1.1.8)	-1.17	1.08	-1.02	1.3	1	-1.05	-1.17	1.3	AW464522			GPD1L	glycerol-3-phosphate dehydrogenase 1-like (EC:1.1.1.8)	1	1.07	1.14	-1.05	-1.06	-1.15	-1.15	AW464522	t60? t480?
1062	RBM4B	RNA binding motif protein 4B	-1.03	1.06	-1.28	-1.01	1.08	-1.01	-1.38	-1.38	AW464526	t15?		RBM4B	RNA binding motif protein 4B	1.24	1.04	1.1	1.12	1.19	-1.07	-1.16	1.24	AW464526	t15?		RBM4B	RNA binding motif protein 4B	1.36	1.17	-1.17	1.06	1.03	1.07	1.36	AW464526	t15?
1063	Ociad1	OCIA domain containing 1	-1.21	1.16	-1.24	1.2	1.15	1	-1.88	-1.88	AW464530			Ociad1	OCIA domain containing 1	1.02	1.06	1.2	1.39	1.4	-1.08	-1.34	1.4	AW464530			Ociad1	OCIA domain containing 1	-1.07	1.28	-1.19	1.16	1.05	1.04	1.28	AW464530
1064	Syngr2	synaptogyrin 2	1.29	1	1.11	-1.15	-1.23	1.11	-1.05	1.29	AW464532			Syngr2	synaptogyrin 2	1.08	1.29	1.12	-1.17	-1.08	1.13	1.11	1.29	AW464532			Syngr2	synaptogyrin 2	1.2	-1.12	1.23	1.29	1.02	-1.02	1.29	AW464532
1065	Ap3m1	adaptor-related protein complex 3, mu 1 subunit	1.25	1.19	1.48	1.07	1.09	1.32	1.05	1.48	AW464545	t60?		Ap3m1	adaptor-related protein complex 3, mu 1 subunit	1.24	1.13	1.2	1.29	1.07	1.32	1.29	1.32	AW464545			Ap3m1	adaptor-related protein complex 3, mu 1 subunit	1.34	1.16	1.42	1.02	1.19	-1.02	1.42	AW464545
1066	CTSK	cathepsin K	1.34	-1.13	-1.45	-1.23	1.2	1.08	-1.18	-1.45	AW464548			CTSK	cathepsin K	1.52	1.41	-1.11	-1.29	1.28	-1.03	-1.5	1.52	AW464548			CTSK	cathepsin K	1.06	-1.3	-1.06	1.41	1.13	1.15	1.41	AW464548
1067	Sec22b		-1.09	1.06	-1.14	-1.09	1.04	1.03	1.05	-1.14	AW464549	t240? t720?		Sec22b		1.06	1.16	-1.14	-1.25	1.13	-1.11	-1.04	-1.25	AW464549	t15? t60? t120? t240? t480?		Sec22b		1.01	-1.03	1.15	1.31	-1.03	1.24	1.31	AW464549	t60? t240? t480?
1068	TIMP3	TIMP metallopeptidase inhibitor 3 (Sorsby fundus dystrophy, pseudoinflammatory)	-1.14	-1.08	1.07	1.16	1.12	1.16	2.06	2.06	AW464550			TIMP3	TIMP metallopeptidase inhibitor 3 (Sorsby fundus dystrophy, pseudoinflammatory)	-1.23	-1.12	1.2	1.32	1.26	-1.02	1.39	1.39	AW464550			TIMP3	TIMP metallopeptidase inhibitor 3 (Sorsby fundus dystrophy, pseudoinflammatory)	1.1	1.21	1.07	1.09	1.01	1.17	1.21	AW464550
1069	Btbd10	BTB (POZ) domain containing 10	-1.04	1.02	-1.2	-1.16	1.09	1.09	-1.04	-1.2	AW464552			Btbd10	BTB (POZ) domain containing 10	1.18	1.16	1.12	-1.2	1.17	1.05	-1	-1.2	AW464552			Btbd10	BTB (POZ) domain containing 10	-1.12	-1.04	-1.13	1.23	1.02	1.09	1.23	AW464552	t480?
1070	PIK3C2G	phosphoinositide-3-kinase, class 2, gamma polypeptide	1.07	-1.06	1.11	-1.13	-1.08	-1.03	1.07	-1.13	AW464561	t720?		PIK3C2G	phosphoinositide-3-kinase, class 2, gamma polypeptide	1.07	1.05	1.04	1.07	1	1.05	1.2	1.2	AW464561	t15? t30? t60? t120? t240? t480? t720?		PIK3C2G	phosphoinositide-3-kinase, class 2, gamma polypeptide	1.05	1.01	1.05	-1.14	-1.02	-1.02	-1.14	AW464561	t15? t30? t60? t120? t240? t480?
1071	PIAS3	protein inhibitor of activated STAT, 3	1.04	1.03	1.53	1.16	1.06	1.08	1.16	1.53	AW464568	t720?		PIAS3	protein inhibitor of activated STAT, 3	-1.02	-1.09	1.05	1.13	1.12	1.04	1.23	1.23	AW464568	t60? t120? t240? t480?		PIAS3	protein inhibitor of activated STAT, 3	1.23	1.21	1.42	1.11	1.03	1.03	1.42	AW464568	t60? t120? t480?
1072	Faf1	Fas (TNFRSF6) associated factor 1	-1.22	-1.08	-1.11	1.06	1.07	-1.1	-1.2	-1.22	AW464575			Faf1	Fas (TNFRSF6) associated factor 1	-1.15	1.11	1.14	1.15	1.33	1.06	-1.23	1.33	AW464575			Faf1	Fas (TNFRSF6) associated factor 1	1	-1.08	-1.04	1.1	-1.19	-1.13	-1.19	AW464575	t60?
1073	AW464583		1.17	-1.05	1.05	1.14	-1.52	-1.14	-1.2	-1.52	AW464583			AW464583		1.19	1.28	1.41	-1.02	-1.21	-1.03	1.21	1.41	AW464583			AW464583		1.34	-1.09	-1.08	1.58	-1.04	-1.07	1.58	AW464583
1074	LOC534005		1.02	1.07	1.05	-1.13	1.23	1.15	1.03	1.23	AW464586	t720?		LOC534005		1.07	-1.01	-1.06	1.07	-1.01	1.14	1.05	1.14	AW464586	t15? t30? t60? t120? t240? t480?		LOC534005		1	1.16	1.2	-1.06	1.25	-1	1.25	AW464586	t30? t60? t120? t480?
1075	GALNT2	UDP-N-acetyl-alpha-D-galactosamine:polypeptide N-acetylgalactosaminyltransferase 2 (GalNAc-T2)	-1.08	-1.05	1.35	1.11	-1.04	-1.11	1.06	1.35	AW464595			GALNT2	UDP-N-acetyl-alpha-D-galactosamine:polypeptide N-acetylgalactosaminyltransferase 2 (GalNAc-T2)	-1.13	-1.06	1.16	1.22	1.1	1	1.1	1.22	AW464595	t60? t120?		GALNT2	UDP-N-acetyl-alpha-D-galactosamine:polypeptide N-acetylgalactosaminyltransferase 2 (GalNAc-T2)	1.12	1.11	1.25	1.01	-1.04	-1.12	1.25	AW464595	t60? t120? t480?
1076	TCFL1		-1.06	1.01	-1.07	-1.02	1.04	-1.13	-1.13	-1.13	AW464600	t480? t720?		TCFL1		-1.12	1.14	1.05	-1.09	1.01	-1.08	-1.02	1.14	AW464600	t15? t30? t60? t120? t240? t480? t720?		TCFL1		1.47	-1.02	-1.09	1.09	1.16	1.03	1.47	AW464600	t15? t30? t60? t120? t240? t480?
1077	Efhc1	EF-hand domain (C-terminal) containing 1	1.35	-1	1.08	-1.14	-1.09	-1.26	-1.44	-1.44	AW464601			Efhc1	EF-hand domain (C-terminal) containing 1	-1.04	-1.02	-1.12	1.02	1.19	-1.03	-1.05	1.19	AW464601	t60?		Efhc1	EF-hand domain (C-terminal) containing 1	1.59	1.15	1.27	1	-1.16	-1.13	1.59	AW464601	t120? t480?
1078	ARPC1A	actin related protein 2/3 complex, subunit 1A, 41kDa	-1.09	1.01	1.34	-1.06	1.06	1.01	-1.14	1.34	AW464605			ARPC1A	actin related protein 2/3 complex, subunit 1A, 41kDa	1.01	-1.09	1.14	1.03	1.14	1.03	1.23	1.23	AW464605			ARPC1A	actin related protein 2/3 complex, subunit 1A, 41kDa	1.04	1.3	1.35	1.12	1.04	1.06	1.35	AW464605
1079	DCTN2	dynactin 2 (p50)	-1.18	-1.21	-1.03	-1.2	1.18	1.08	-1.88	-1.88	AW464608			DCTN2	dynactin 2 (p50)	1.21	-1.25	1.15	1.29	1.32	1.22	-1.26	1.32	AW464608			DCTN2	dynactin 2 (p50)	-1.25	1.28	1.07	-1.15	1.1	-1.08	1.28	AW464608
1080	Hsp90aa1		-1.12	1.1	-1.13	1.04	1.65	1.46	1.25	1.65	AW464616			Hsp90aa1		1.21	1.26	1.1	1.37	1.41	1.23	1.02	1.41	AW464616			Hsp90aa1		-1.13	1.08	1.01	1.01	1.42	1.2	1.42	AW464616
1081	Mybpc2	myosin binding protein C, fast-type	-1.22	1.52	-2.53	-1.65	-1.2	1.2	-1.15	-2.53	AW464619	t240?		Mybpc2	myosin binding protein C, fast-type	1.12	1.68	-1.28	-1.5	1.16	1.28	-1.27	1.68	AW464619	t480?		Mybpc2	myosin binding protein C, fast-type	1.13	-1.13	-1.57	1.12	-1.32	-1.01	-1.57	AW464619
1082	CD9	CD9 molecule	-1.05	-1.05	1.5	1.3	1.07	-1.18	1.48	1.5	AW464620			CD9	CD9 molecule	-1.21	1.22	1.19	-1.23	1.32	-1.52	1.42	-1.52	AW464620	t120? t720?		CD9	CD9 molecule	1.13	-1.13	1.51	2	-1.05	1.13	2	AW464620
1083	DNASE2	deoxyribonuclease II, lysosomal (EC:3.1.22.1)	1.09	1	1.02	-1.16	1.02	1.12	1.12	-1.16	AW464626			DNASE2	deoxyribonuclease II, lysosomal (EC:3.1.22.1)	1.21	-1.01	1.02	-1.05	1.02	1.02	-1.01	1.21	AW464626	t15? t30? t60? t120? t240? t480? t720?		DNASE2	deoxyribonuclease II, lysosomal (EC:3.1.22.1)	-1.03	1.03	1.06	1.03	1.03	1.12	1.12	AW464626	t30? t60? t240? t480?
1084	ATF3	activating transcription factor 3	-1.06	1.01	1.3	-1.17	1.05	1.24	1.72	1.72	AW464633	t720?		ATF3	activating transcription factor 3	-1.01	1.26	-1.01	-1.06	1.18	1.09	1.3	1.3	AW464633	t15? t30? t60? t240? t480?		ATF3	activating transcription factor 3	1.04	-1.2	1.33	1.01	-1.06	1.15	1.33	AW464633	t30? t60? t120? t240? t480?
1085	Atp6v1g1	ATPase, H+ transporting, lysosomal V1 subunit G1	-1.12	-1.13	-1.08	1.17	1.34	1.42	1.56	1.56	AW464635			Atp6v1g1	ATPase, H+ transporting, lysosomal V1 subunit G1	-1.04	1.06	1.13	1.52	1.39	1.32	1.26	1.52	AW464635			Atp6v1g1	ATPase, H+ transporting, lysosomal V1 subunit G1	1.01	1	1.12	1.08	1.14	1.06	1.14	AW464635
1086	LDHA	lactate dehydrogenase A	-1.46	1.08	1.01	1.09	1.2	1.61	2.13	2.13	AW464637			LDHA	lactate dehydrogenase A	-1.13	1.02	-1.11	1.08	1.18	1.24	-1.07	1.24	AW464637			LDHA	lactate dehydrogenase A	-1.1	1.24	1.38	1.34	1.19	1.26	1.38	AW464637
1087	AW464640		1.16	1	-1.13	1.09	1.01	-1.19	-1.13	-1.19	AW464640			AW464640		1.14	1.21	-1.01	1.44	1.07	-1.1	1.75	1.75	AW464640			AW464640		1.08	1.02	-1.11	-1.05	1.12	-1.01	1.12	AW464640
1088	LOC616771		1.04	-1.01	1.09	-1.02	-1.21	1.05	-1.15	-1.21	AW464641	t15? t30? t60? t120?		LOC616771		1.02	1.17	1.06	1.18	-1.14	1.03	-1.19	-1.19	AW464641	t240?		LOC616771		-1	-1.13	1.09	-1.08	1.06	1.06	-1.13	AW464641	t15? t240?
1089	DNMT3B	DNA (cytosine-5-)-methyltransferase 3 beta	-1.26	-1.09	1.15	1.03	1.04	-1.03	1.01	-1.26	AW464642			DNMT3B	DNA (cytosine-5-)-methyltransferase 3 beta	-1.04	-1.1	1.15	1.26	-1.03	1.15	1.18	1.26	AW464642	t15? t60? t120?		DNMT3B	DNA (cytosine-5-)-methyltransferase 3 beta	-1.13	1.1	1.03	-1.07	1.21	-1.1	1.21	AW464642	t15? t60? t120? t480?
1090	PLXNA3	plexin A3	1.6	-1.28	1.37	1.26	1.03	1.16	-1.16	1.6	AW464650			PLXNA3	plexin A3	1.44	-1.15	1.23	1.64	-1.03	1.55	-1.09	1.64	AW464650	t720?		PLXNA3	plexin A3	1.84	1.04	1.37	1.02	1.29	-1.23	1.84	AW464650
1091	WNK1		-1.1	-1.06	-1.06	-1.09	1.26	1.02	-1.14	1.26	AW464654			WNK1		-1.02	-1.07	-1	1.1	1.26	1.06	-1.15	1.26	AW464654			WNK1		1.1	1.08	1.21	1.08	1.12	-1.02	1.21	AW464654
1092	FGFR2	fibroblast growth factor receptor 2 (bacteria-expressed kinase, keratinocyte growth factor receptor,	1	-1.08	1.21	1.01	1.02	-1.22	-1.39	-1.39	AW464656			FGFR2	fibroblast growth factor receptor 2 (bacteria-expressed kinase, keratinocyte growth factor receptor,	1.03	-1.07	1.1	1.34	1.12	-1.06	-1	1.34	AW464656			FGFR2	fibroblast growth factor receptor 2 (bacteria-expressed kinase, keratinocyte growth factor receptor,	1.15	1.12	1.29	-1.11	1.02	-1.07	1.29	AW464656
1093	MGC134073		1.01	-1.01	-1.14	-1.13	-1.02	1.06	-1.07	-1.14	AW464659	t240? t480? t720?		MGC134073		1.05	1.02	1.01	-1.11	-1.03	1.01	-1.23	-1.23	AW464659	t15? t30? t60? t120? t240? t480? t720?		MGC134073		1.01	-1	-1.08	1.1	1.06	1.07	1.1	AW464659	t30? t60? t120? t240? t480?
1094	LOC785809		1.16	-1.15	1.35	1.33	1	1.08	-1.06	1.35	AW464669			LOC785809		1.06	-1.12	1.03	1.63	1.1	1.32	1.18	1.63	AW464669			LOC785809		1.04	1.09	1.35	-1.02	-1.01	-1.08	1.35	AW464669
1095	HAX1		1.07	-1.08	1.18	-1.1	-1.09	-1.06	1.08	1.18	AW464671	t240? t720?		HAX1		-1.07	-1	-1.08	-1.16	1.06	-1.07	1.02	-1.16	AW464671	t60? t120? t240? t480? t720?		HAX1		1.21	-1.05	1.21	1.05	-1.08	1.05	1.21	AW464671	t30? t60? t120? t480?
1096	LOC615412		-1.06	-1.11	-1.33	-1.07	1.25	-1.02	-1.08	-1.33	AW464677			LOC615412		-1.06	1.05	-1.19	1.29	1.54	1.17	-1.43	1.54	AW464677	t720?		LOC615412		1.07	-1.07	1.06	-1.09	-1.2	-1.09	-1.2	AW464677	t60?
1097	P2RX4	purinergic receptor P2X, ligand-gated ion channel, 4	-1.17	-1.07	1.34	-1.22	-1.38	-1.21	-1.14	-1.38	AW464680	t240? t720?		P2RX4	purinergic receptor P2X, ligand-gated ion channel, 4	-1.37	1.22	1.12	-1.08	-1.01	-1.11	1.02	-1.37	AW464680	t15? t240? t480?		P2RX4	purinergic receptor P2X, ligand-gated ion channel, 4	1.29	-1.18	1.2	1.01	-1.23	-1.03	1.29	AW464680	t60? t120? t480?
1098	COPS5	COP9 constitutive photomorphogenic homolog subunit 5 (Arabidopsis)	1.01	-1.05	1.15	1.13	-1.14	1.06	-1.07	1.15	AW464681			COPS5	COP9 constitutive photomorphogenic homolog subunit 5 (Arabidopsis)	-1.05	1.11	1.08	1.22	1.07	1.08	1.06	1.22	AW464681			COPS5	COP9 constitutive photomorphogenic homolog subunit 5 (Arabidopsis)	1.01	-1.04	1.21	1.16	-1.1	-1.08	1.21	AW464681
1099	MGC128086		1.05	-1.02	-1.5	1.05	1.41	1.17	-1.46	-1.5	AW464685			MGC128086		1.26	1.19	1.2	1.19	1.25	-1.04	1.28	1.28	AW464685			MGC128086		-1.03	1.03	-1.49	1.17	1.36	1.24	-1.49	AW464685
1100	AW464693		-1.26	1.01	-1.02	-1.02	1.01	-1.03	1.09	-1.26	AW464693	t240? t480? t720?		AW464693		-1.07	1.26	1.05	1.01	1.46	-1.02	1.18	1.46	AW464693	t15? t30? t60? t120? t240? t480? t720?		AW464693		-1.04	-1.02	-1.02	1.01	-1.16	1.25	1.25	AW464693	t15? t30? t60? t120? t240? t480?
1101	Slc25a20		1.2	1.15	-1.14	-1.36	1.24	-1.07	1.02	-1.36	AW464694			Slc25a20		1.3	1.14	-1.01	-1.05	1.18	-1	1.09	1.3	AW464694			Slc25a20		1.04	1.06	1.04	1.04	1.12	1.04	1.12	AW464694
1102	COPS8	COP9 constitutive photomorphogenic homolog subunit 8 (Arabidopsis)	-1.04	-1.09	1.17	1.19	1.02	1.08	1.26	1.26	AW464695			COPS8	COP9 constitutive photomorphogenic homolog subunit 8 (Arabidopsis)	-1.03	-1.13	1.18	1.26	-1.04	1.07	1.27	1.27	AW464695			COPS8	COP9 constitutive photomorphogenic homolog subunit 8 (Arabidopsis)	1.1	1.12	1.16	1.17	1.27	-1	1.27	AW464695	t240?
1103	Stoml2	stomatin (Epb7.2)-like 2	1.16	1.06	-1.12	-1.06	1.14	-1.03	-1.07	1.16	AW464699			Stoml2	stomatin (Epb7.2)-like 2	1.3	1.27	1.22	-1.26	1.21	-1.1	-1.08	1.3	AW464699	t720?		Stoml2	stomatin (Epb7.2)-like 2	1.01	-1.03	-1.02	1.43	1.07	1.01	1.43	AW464699
1104	GCN5L2	GCN5 general control of amino-acid synthesis 5-like 2 (yeast)	1.12	-1.4	1.03	-1.16	1.31	1.1	1.06	-1.4	AW464700			GCN5L2	GCN5 general control of amino-acid synthesis 5-like 2 (yeast)	1.11	-1.07	1.26	-1.07	1.38	1.26	-1.02	1.38	AW464700			GCN5L2	GCN5 general control of amino-acid synthesis 5-like 2 (yeast)	1.22	-1.07	-1.02	1.18	1.07	-1.04	1.22	AW464700
1105	HOMER3	homer homolog 3 (Drosophila)	-1	1.19	1.04	-1.33	-1.36	1.03	1.08	-1.36	AW464702	t15? t30? t240? t720?		HOMER3	homer homolog 3 (Drosophila)	-1.32	1.31	1.04	-1.33	-1.03	-1.1	1.36	1.36	AW464702			HOMER3	homer homolog 3 (Drosophila)	1.33	-1.02	1.03	1.08	-1.11	1.19	1.33	AW464702	t60? t120? t240?
1106	CIP29		-1.09	1.1	1.28	1.35	-1.17	1.08	1.22	1.35	AW464703			CIP29		1.02	-1.04	1.33	1.49	1.02	-1.04	1.31	1.49	AW464703			CIP29		-1.02	1.2	1.31	1.21	1.01	1.04	1.31	AW464703
1107	MGC14327		1.16	1.06	1.41	-1.04	-1.1	1.05	1.05	1.41	AW464717			MGC14327		-1.15	1.02	1.13	1.1	1.24	1.12	1.22	1.24	AW464717			MGC14327		1.42	1.2	1.44	1.09	-1.16	-1.02	1.44	AW464717
1108	MNAT1	menage a trois homolog 1, cyclin H assembly factor (Xenopus laevis)	-1.02	-1.21	1.17	1.02	-1.14	-1.15	1.08	-1.21	AW464718	t720?		MNAT1	menage a trois homolog 1, cyclin H assembly factor (Xenopus laevis)	-1.1	-1.13	1.13	1.04	1.08	-1.1	1.09	1.13	AW464718	t15? t60? t120? t240? t480? t720?		MNAT1	menage a trois homolog 1, cyclin H assembly factor (Xenopus laevis)	1.15	-1.08	1.05	1.04	-1.06	-1.01	1.15	AW464718	t15? t30? t60? t120? t240? t480?
1109	PFAAP5		-1.03	1.16	-1.28	1.03	-1.03	1.21	-1.05	-1.28	AW464719			PFAAP5		1.08	1.1	1.23	1.29	-1.09	1.06	1.01	1.29	AW464719			PFAAP5		1.13	1.22	-1.22	1.05	1.26	1.14	1.26	AW464719
1110	CALML5		1.06	-1.43	1.23	-1.18	-1.35	-1.05	1.54	1.54	AW464722	t15? t30?		CALML5		-1.58	-1.21	-1.3	-1.07	1.31	1.19	1.34	-1.58	AW464722			CALML5		1.56	-1.03	1.57	1.02	-1.62	-1.16	-1.62	AW464722
1111	LOC528252		1.01	-1.1	-1.08	-1.31	1.14	1.03	-1.21	-1.31	AW464725			LOC528252		1.16	1.01	1.03	-1.03	1.22	1.12	-1.2	1.22	AW464725	t720?		LOC528252		1.02	1.02	1.1	1.01	-1	-1.02	1.1	AW464725
1112	DCUN1D5	DCN1, defective in cullin neddylation 1, domain containing 5 (S. cerevisiae)	1.02	1.09	1.02	1.03	-1.07	-1.02	1.03	1.09	AW464730			DCUN1D5	DCN1, defective in cullin neddylation 1, domain containing 5 (S. cerevisiae)	-1.07	1.03	1.18	1.14	-1.12	-1	1.21	1.21	AW464730	t60? t240? t480?		DCUN1D5	DCN1, defective in cullin neddylation 1, domain containing 5 (S. cerevisiae)	1.27	1.15	-1.06	1	1.15	1.02	1.27	AW464730	t60? t120? t480?
1113	ARHGAP23	Rho GTPase activating protein 23	1.07	-1.03	-1.13	-1.5	1.16	1.02	-1.04	-1.5	AW464731	t15? t30? t60? t120? t240? t480? t720?		ARHGAP23	Rho GTPase activating protein 23	1.03	1.18	-1.06	-1.55	1	1	-1.41	-1.55	AW464731	t240? t480? t720?		ARHGAP23	Rho GTPase activating protein 23	1.2	-1.29	-1.04	1.19	1.23	1.01	-1.29	AW464731	t30? t60? t480?
1114	AW464741		1.05	1.08	-1.29	-1.04	1.06	-1.3	-1.06	-1.3	AW464741	t15? t30? t240?		AW464741		1.06	1.2	1.02	-1.17	1	-1.27	-1	-1.27	AW464741	t240?		AW464741		1.1	-1.04	-1.16	1.21	1.22	-1.01	1.22	AW464741	t120? t480?
1115	CST3	cystatin C	1.07	-1.09	1.28	-1.14	-1.18	1.39	-1.26	1.39	AW464743			CST3	cystatin C	1	1.62	1.05	-1.13	1.04	1.21	-1.01	1.62	AW464743			CST3	cystatin C	1.23	-1.43	1.52	1.28	-1.02	1.15	1.52	AW464743
1116	Ncdn	neurochondrin	1.07	-1.28	1.2	1.29	1	-1.29	-1.13	1.29	AW464751			Ncdn	neurochondrin	1.1	-1.56	1.3	1.3	-1.14	-1.19	1.5	-1.56	AW464751			Ncdn	neurochondrin	1.33	1.48	1.15	1.29	1.39	-1.04	1.48	AW464751
1117	Sft2d3	SFT2 domain containing 3	1.11	1.04	-1.43	-1.17	1.31	1.18	-1.39	-1.43	AW464752			Sft2d3	SFT2 domain containing 3	1.15	1.14	1.03	-1.07	1.18	1.01	-1.13	1.18	AW464752	t15?		Sft2d3	SFT2 domain containing 3	1.01	-1.02	-1.28	1.04	1.22	1.15	-1.28	AW464752	t480?
1118	SLC20A2	solute carrier family 20 (phosphate transporter), member 2	1.12	-1.08	1	1.11	-1.07	1.12	1	1.12	AW464753			SLC20A2	solute carrier family 20 (phosphate transporter), member 2	1.05	-1.09	1.1	1.08	-1.07	1.1	1.11	1.11	AW464753	t60? t240? t480?		SLC20A2	solute carrier family 20 (phosphate transporter), member 2	1.37	1.09	-1.07	1.11	1.15	1.06	1.37	AW464753	t15? t60? t120? t480?
1119	Strbp	spermatid perinuclear RNA binding protein	-1.01	-1.02	-1.33	-1.07	1.19	1.13	-1.32	-1.33	AW464757	t720?		Strbp	spermatid perinuclear RNA binding protein	1.37	1.25	-1.03	1.11	1.06	1.11	-1.25	1.37	AW464757	t240? t720?		Strbp	spermatid perinuclear RNA binding protein	-1.15	-1.14	-1.02	1.15	1.16	1.05	1.16	AW464757
1120	LOC507436		-1.08	1.35	-1.16	1.1	1.46	1.77	2.45	2.45	AW464762	t480? t720?		LOC507436		1.05	1.42	-1.07	-1.03	1.43	1.05	-1.29	1.43	AW464762	t15? t30? t60? t240? t480? t720?		LOC507436		1.08	-1.04	-1.17	1.21	1.15	1.62	1.62	AW464762	t15? t30? t60? t120? t240? t480?
1121	Slc35f5		-1.24	1.1	-1.07	1.07	1.18	1.05	-1.03	-1.24	AW464767	t60? t720?		Slc35f5		-1.03	1.05	1.04	1.29	1.22	1.16	-1.37	-1.37	AW464767	t720?		Slc35f5		-1.06	1.16	-1.02	1.03	1.11	-1.07	1.16	AW464767	t60?
1122	GOLGB1	golgin B1, golgi integral membrane protein	-1.03	1.05	1.05	-1.21	-1.04	-1.09	-1.06	-1.21	AW464773	t720?		GOLGB1	golgin B1, golgi integral membrane protein	-1.03	1.21	1.1	-1.28	1.09	-1.16	-1.15	-1.28	AW464773	t15? t60? t240? t480? t720?		GOLGB1	golgin B1, golgi integral membrane protein	1.11	-1.1	-1.02	1.19	1.01	1.08	1.19	AW464773	t30? t60? t120? t240? t480?
1123	Txn2	thioredoxin 2	-1.21	1.16	-1.37	-1.04	-1.07	-1.63	-1.21	-1.63	AW464776	t15? t30? t60? t240?		Txn2	thioredoxin 2	-1.02	1.49	1.16	-1.39	-1.24	-1.76	-1.2	-1.76	AW464776			Txn2	thioredoxin 2	-1.06	-1.13	-1.26	1.58	1.46	1.02	1.58	AW464776	t480?
1124	Ankrd16		1.27	-1.03	1.69	1.11	-1.03	1.28	1.15	1.69	AW464777			Ankrd16		1.04	1.01	1.1	1.1	1.08	1.31	1.3	1.31	AW464777	t15? t60? t120?		Ankrd16		1.25	-1.01	1.5	1.11	-1.03	1.01	1.5	AW464777	t15? t60? t120? t480?
1125	LOC541268		1.22	1.04	-1.09	-1.27	-1.03	-1.11	1.23	-1.27	AW464778	t720?		LOC541268		1.31	1.23	-1.13	-1.37	-1.06	-1.1	-1.08	-1.37	AW464778	t15? t240? t480?		LOC541268		1.06	-1.17	1.06	1.18	1.22	1.01	1.22	AW464778	t60? t120? t480?
1126	THRAP6	mediator complex subunit 30	1.09	-1.03	1.12	-1.29	1.21	1.23	1.14	-1.29	AW464786			THRAP6	mediator complex subunit 30	1.11	1.04	1.06	-1.17	1.31	1.14	1.07	1.31	AW464786			THRAP6	mediator complex subunit 30	1.02	1.02	1.29	1.13	-1.03	1.09	1.29	AW464786
1127	CLCN3	chloride channel 3	1.07	1.02	1.19	1	-1.1	1.03	1.01	1.19	AW464787	t15? t30? t60? t120? t240? t720?		CLCN3	chloride channel 3	1.04	1.11	-1.14	-1.08	1.05	-1.04	1.09	-1.14	AW464787	t15? t60? t120? t240? t480?		CLCN3	chloride channel 3	1.11	-1.03	1.37	1.17	-1.11	1.07	1.37	AW464787	t60? t120? t480?
1128	MEMO1		-1.24	1.02	-1.06	-1.17	-1.15	1.01	1.13	-1.24	AW464792	t240? t720?		MEMO1		-1.04	1.14	1.14	-1.12	-1.12	1.08	-1	1.14	AW464792	t15? t60? t120? t240? t480? t720?		MEMO1		1.09	1.01	-1.18	1.02	1.09	1.02	-1.18	AW464792	t30? t60? t120? t240? t480?
1129	Crsp8	mediator complex subunit 27	1.24	-1.02	-1	1.21	-1.01	1.04	1.02	1.24	AW464794			Crsp8	mediator complex subunit 27	1.09	1.01	1.32	1.45	-1.04	1.11	1.48	1.48	AW464794			Crsp8	mediator complex subunit 27	1.22	1.18	-1.05	1.1	1.2	-1.02	1.22	AW464794
1130	C1orf77		-1.02	1.18	1.01	-1.23	1.22	1.31	1.26	1.31	AW464803	t240?		C1orf77		1.04	1.21	-1.02	-1.21	1.3	1.14	1.17	1.3	AW464803			C1orf77		1.01	1.08	1.36	1.37	1.03	1.14	1.37	AW464803
1131	PCID2		1.11	1.12	1.15	-1.73	-1.05	-1.2	-1.46	-1.73	AW464810			PCID2		1.41	1.43	1.54	-1.91	-1.08	1.07	-1.07	-1.91	AW464810			PCID2		1.15	-1.06	-1.07	1.45	1.25	-1.25	1.45	AW464810
1132	RFC2	replication factor C (activator 1) 2, 40kDa	1.24	1.31	-1.43	-1.19	1.26	1.18	-1.42	-1.43	AW464812			RFC2	replication factor C (activator 1) 2, 40kDa	1.17	1.32	-1.15	-1.07	1.21	1.16	-1.44	-1.44	AW464812			RFC2	replication factor C (activator 1) 2, 40kDa	1.14	1.04	1.1	1.28	1.16	1.07	1.28	AW464812
1133	ZNF235		-1.11	-1.06	1.04	1	-1.15	-1.14	1.04	-1.15	AW464817	t15? t30? t60? t120? t240? t480? t720?		ZNF235		-1.17	1	1	1	1.03	-1.06	1.12	-1.17	AW464817	t15? t30? t60? t120? t240? t480? t720?		ZNF235		1.27	-1.01	1	-1	-1.06	1.06	1.27	AW464817	t30? t60? t120? t240? t480?
1134	Lgals9	lectin, galactose binding, soluble 9	-1.12	-1.05	-1.18	-1.27	-1.11	1.39	-1.36	1.39	AW464819			Lgals9	lectin, galactose binding, soluble 9	-1.14	1.57	-1.32	1.4	1.77	1.22	1.26	1.77	AW464819			Lgals9	lectin, galactose binding, soluble 9	1.27	-1.34	1.38	-1.33	-1.62	1.18	-1.62	AW464819
1135	GLI4	GLI-Kruppel family member GLI4	1.03	-1.27	1.2	-1.03	1.24	1.14	1.12	-1.27	AW464823			GLI4	GLI-Kruppel family member GLI4	1	-1.16	1.2	1.17	1.06	1.25	1.33	1.33	AW464823			GLI4	GLI-Kruppel family member GLI4	1.12	1.07	1.03	1	1.23	-1.04	1.23	AW464823
1136	ANXA4	annexin A4	-1.14	1.22	1.04	-1.33	-1.1	1.34	1.15	1.34	AW464824			ANXA4	annexin A4	-1.02	1.24	-1.19	-1.27	1.49	1.26	1.54	1.54	AW464824			ANXA4	annexin A4	1.02	1.06	1.52	1.25	-1.48	1.07	1.52	AW464824
1137	C14orf119		1.39	-1.12	-1.01	1.04	1.05	1.18	-1.14	1.39	AW464828			C14orf119		1.24	1.16	1.05	1.06	1.04	1.07	-1	1.24	AW464828			C14orf119		1.09	-1.07	1.18	1.22	1.15	1.12	1.22	AW464828
1138	TRIM28	tripartite motif-containing 28	1.25	1.1	1.42	-1.1	1.18	1.19	-1.05	1.42	AW464834			TRIM28	tripartite motif-containing 28	1.13	1.12	1.18	-1.08	1.42	1.14	1.34	1.42	AW464834			TRIM28	tripartite motif-containing 28	1.44	1.2	1.5	1.3	1	1.09	1.5	AW464834
1139	ZNF274	zinc finger protein 274	1.19	-1.09	1.09	1.03	-1.05	-1.03	1.04	1.19	AW464835	t15? t60? t240?		ZNF274	zinc finger protein 274	1.2	-1.04	1.03	-1.03	-1.1	1.06	1.27	1.27	AW464835	t15? t30? t60? t120? t240? t480?		ZNF274	zinc finger protein 274	1	1.01	1.04	1.08	1.1	-1.03	1.1	AW464835	t30? t60? t120? t480?
1140	PSMD5	proteasome (prosome, macropain) 26S subunit, non-ATPase, 5	1.08	1.06	1.04	1.08	-1.1	1.06	-1.05	-1.1	AW464836			PSMD5	proteasome (prosome, macropain) 26S subunit, non-ATPase, 5	-1.01	-1.01	1.25	1.3	-1.18	1.06	1.15	1.3	AW464836			PSMD5	proteasome (prosome, macropain) 26S subunit, non-ATPase, 5	1.25	1.16	-1.04	1.02	1.2	1.04	1.25	AW464836
1141	F11R	F11 receptor	-1.14	1.31	1.26	-1.12	1.13	1.54	1.27	1.54	AW464837			F11R	F11 receptor	-1.31	1.39	1.1	1.27	1.44	1.62	1.58	1.62	AW464837			F11R	F11 receptor	1.34	1.03	1.4	-1.06	-1.07	-1.07	1.4	AW464837
1142	ENTPD1	ectonucleoside triphosphate diphosphohydrolase 1	-1.06	-1.02	1.01	1.09	1.03	1.03	1.02	1.09	AW464839			ENTPD1	ectonucleoside triphosphate diphosphohydrolase 1	-1.11	1.07	1.06	1	-1.11	1.06	1.19	1.19	AW464839	t15? t30? t60? t120? t240? t480?		ENTPD1	ectonucleoside triphosphate diphosphohydrolase 1	1.27	1.05	1	1.11	1.25	1.07	1.27	AW464839	t15? t30? t60? t120? t240? t480?
1143	ARSA	arylsulfatase A	-1.22	1.17	-1.9	-1.22	1.37	-1.02	-1.58	-1.9	AW464840			ARSA	arylsulfatase A	1.42	1.6	-1.1	-1.07	1.23	-1.23	-1.04	1.6	AW464840			ARSA	arylsulfatase A	-1.62	-1.14	-1.44	1.23	1.33	1.27	-1.62	AW464840
1144	LOC401152		-1.08	1.02	-1.25	1.14	1.42	1.34	1.1	1.42	AW464843			LOC401152		1.32	1.2	1.08	1.34	1.45	1.06	-1	1.45	AW464843			LOC401152		-1.09	1.03	-1.02	1.15	1.19	1.19	1.19	AW464843
1145	Bphl	biphenyl hydrolase-like (serine hydrolase, breast epithelial mucin-associated antigen)	1.03	-1.01	1.16	1.07	1.07	-1.1	-1.08	1.16	AW464844	t15? t30? t60? t120? t240? t480?		Bphl	biphenyl hydrolase-like (serine hydrolase, breast epithelial mucin-associated antigen)	-1.02	-1.02	1.05	1.31	1.01	1.11	1.02	1.31	AW464844	t15? t30? t60? t120? t240? t480?		Bphl	biphenyl hydrolase-like (serine hydrolase, breast epithelial mucin-associated antigen)	1.17	1.13	1.14	-1.16	1.17	-1.16	1.17	AW464844	t30? t60? t120? t480?
1146	Slc36a2	solute carrier family 36 (proton/amino acid symporter), member 2	-1.01	-1.12	1.27	-1.09	1.2	1.06	1.23	1.27	AW464855			Slc36a2	solute carrier family 36 (proton/amino acid symporter), member 2	1.01	-1.14	-1	1.26	1.02	1.12	1.49	1.49	AW464855	t30? t60? t120? t240? t480?		Slc36a2	solute carrier family 36 (proton/amino acid symporter), member 2	1.08	1.07	1.27	-1.15	1.31	1.02	1.31	AW464855	t30? t60? t120? t480?
1147	DHRS9		-1.1	-1.04	1.07	1.02	1.1	1.2	1.32	1.32	AW464858	t720?		DHRS9		1.06	1.02	-1.02	1.14	1.1	1.1	-1.01	1.14	AW464858	t15? t30? t60? t120? t240? t480? t720?		DHRS9		-1.02	1.07	1.14	-1.07	1.06	1.17	1.17	AW464858	t15? t30? t60? t120? t240? t480?
1148	C10orf30		-1.05	-1.09	1.07	-1.04	-1.08	-1.17	-1.07	-1.17	AW464859	t240? t720?		C10orf30		1.02	1.04	1.02	1.03	1.04	-1.13	-1.06	-1.13	AW464859	t15? t30? t60? t120? t240? t480? t720?		C10orf30		1.1	-1	1.04	-1.03	-1.01	1.04	1.1	AW464859	t15? t30? t60? t120? t240? t480?
1149	RHOB	ras homolog gene family, member B	-1.13	1.52	1.37	1.28	1.61	1.75	2.55	2.55	AW464871			RHOB	ras homolog gene family, member B	1.27	1.75	1.4	1.49	1.7	1.43	1.61	1.75	AW464871			RHOB	ras homolog gene family, member B	-1.08	-1.05	1.1	1.18	1.03	1.15	1.18	AW464871
1150	CBFA2T2		-1.03	1.17	-1.09	1.14	1.1	1.12	-1.12	1.17	AW464877			CBFA2T2		1.05	1.08	1.07	1.32	1.13	1.1	1.02	1.32	AW464877	t60? t120? t240? t480?		CBFA2T2		-1.06	1.21	-1.05	1.03	1.02	1.08	1.21	AW464877	t30? t60? t480?
1151	SLC26A2	solute carrier family 26 (sulfate transporter), member 2	1.05	1.02	1.21	-1.16	1.03	1.06	-1.01	1.21	AW464878	t720?		SLC26A2	solute carrier family 26 (sulfate transporter), member 2	-1.06	1.11	-1.11	-1.06	1.28	1.08	1.2	1.28	AW464878			SLC26A2	solute carrier family 26 (sulfate transporter), member 2	1.13	-1.03	1.28	1.07	-1.16	1.08	1.28	AW464878	t60?
1152	Trim27	tripartite motif-containing 27	1.14	-1.03	-1.01	1.17	-1.03	-1	1.23	1.23	AW464880			Trim27	tripartite motif-containing 27	1.23	-1.13	1.22	1.26	-1.08	1.06	1.54	1.54	AW464880			Trim27	tripartite motif-containing 27	1.16	1.23	-1.01	1.15	1.26	-1.05	1.26	AW464880
1153	Phf5a	PHD finger protein 5A	-1.24	1.04	-1.5	-1.02	1.05	-1.1	-1.4	-1.5	AW464881			Phf5a	PHD finger protein 5A	1.11	1.25	-1.06	-1.07	1.13	-1.26	-1.38	-1.38	AW464881	t720?		Phf5a	PHD finger protein 5A	-1.37	-1.05	-1.07	1.31	1.01	1.07	-1.37	AW464881
1154	VASP	vasodilator-stimulated phosphoprotein	1.18	-1.04	1.55	-1	-1.5	1.05	1.37	1.55	AW464882	t15? t30? t60? t120? t240?		VASP	vasodilator-stimulated phosphoprotein	-1.07	1.05	1.31	1.02	-1.01	-1.1	1.49	1.49	AW464882			VASP	vasodilator-stimulated phosphoprotein	1.28	1.05	1.38	1.17	-1.23	1.07	1.38	AW464882
1155	ARPC4	actin related protein 2/3 complex, subunit 4, 20kDa	1.08	1.25	1.43	1.4	-1.13	1.15	1.44	1.44	AW464884	t15? t120?		ARPC4	actin related protein 2/3 complex, subunit 4, 20kDa	1.16	1.27	1.41	1.47	-1.03	1	1.64	1.64	AW464884	t720?		ARPC4	actin related protein 2/3 complex, subunit 4, 20kDa	1.08	1.12	1.25	1.28	1.14	1.08	1.28	AW464884
1156	PCID1		-1.05	-1.09	1.1	1.24	1.04	1.44	1.17	1.44	AW464895			PCID1		-1.01	1.15	1.03	1.23	1.03	1.21	1.12	1.23	AW464895			PCID1		1.1	-1.02	1.36	1.37	1.23	1.1	1.37	AW464895
1157	Slco2b1		-1.23	1.27	-1.18	-1.09	1.02	-1.31	-1.47	-1.47	AW464903	t15?		Slco2b1		-1.09	1.42	1.03	1.12	-1.03	-1.1	1.64	1.64	AW464903			Slco2b1		1	1.1	-1.05	-1.02	1.21	-1.16	1.21	AW464903
1158	Ttf1	transcription termination factor 1	1.01	-1.12	1.13	1.1	-1.52	1.09	1.28	-1.52	AW464905			Ttf1	transcription termination factor 1	-1.26	1.19	1	1.29	-1	-1.08	1.5	1.5	AW464905	t15? t60?		Ttf1	transcription termination factor 1	1.19	-1.11	1.31	-1.09	-1.32	1.22	-1.32	AW464905	t60?
1159	ZDHHC18		1.09	1.01	1.17	1.13	1.19	1.25	1.35	1.35	AW464906	t120? t720?		ZDHHC18		1.06	1.05	1.22	1.44	1.05	1.15	1.37	1.44	AW464906			ZDHHC18		1.2	1.08	1.13	-1.09	1.27	1.09	1.27	AW464906	t120?
1160	Rab14	RAB14, member RAS oncogene family	1.05	1.07	1.39	1.11	-1.03	1.23	1.13	1.39	AW464907	t15? t30?		Rab14	RAB14, member RAS oncogene family	-1.01	1.26	1.32	1.17	1.15	1.08	1.08	1.32	AW464907			Rab14	RAB14, member RAS oncogene family	1.06	-1.03	1.26	1.16	-1.04	1.07	1.26	AW464907
1161	BUD31		1.08	1.32	1.2	-1.08	1.03	1.1	-1.03	1.32	AW464909			BUD31		-1	1.22	1.03	1.13	1.19	1.12	1.09	1.22	AW464909			BUD31		1.22	1.17	1.33	1.1	-1.02	1.03	1.33	AW464909
1162	USP2	ubiquitin specific peptidase 2	1.11	-1.04	1.03	-1.12	1.02	-1.1	-1.02	-1.12	AW464915			USP2	ubiquitin specific peptidase 2	1.01	-1.02	1.08	1.01	-1.06	-1.01	1.08	1.08	AW464915	t15? t30? t60? t120? t240? t480?		USP2	ubiquitin specific peptidase 2	1.13	1.09	-1.01	-1.09	1.17	-1	1.17	AW464915	t30? t60? t120? t240? t480?
1163	LOC509964		1.07	-1.04	1.06	-1.18	1.19	1.02	1.07	1.19	AW464916			LOC509964		1.13	-1.24	1.04	1.05	1.05	1.06	1.31	1.31	AW464916	t60? t120? t240? t480?		LOC509964		1.06	1.27	1.05	-1.04	1.21	1.06	1.27	AW464916	t60? t120? t480?
1164	Dnajb12	DnaJ (Hsp40) homolog, subfamily B, member 12	-1.19	-1.14	1.06	-1.46	-1.55	1.16	1.37	-1.55	AW464918			Dnajb12	DnaJ (Hsp40) homolog, subfamily B, member 12	-1.35	1.24	-1.41	-1.2	-1.12	1.09	-1.12	-1.41	AW464918	t15?		Dnajb12	DnaJ (Hsp40) homolog, subfamily B, member 12	1.23	-1.31	1.62	1.03	-1.3	1.17	1.62	AW464918	t60?
1165	Nppc	natriuretic peptide precursor type C	-1.17	1.26	-2	-1.24	-1.17	-1.14	-1	-2	AW464920	t15? t30? t60? t120? t240?		Nppc	natriuretic peptide precursor type C	1.09	1.39	-1.02	-1.01	-1.23	-1.34	1.04	1.39	AW464920			Nppc	natriuretic peptide precursor type C	-1.08	-1.03	-1.72	-1.06	1.36	1.18	-1.72	AW464920	t480?
1166	Wdr26	WD repeat domain 26	-1.11	1.25	-1.37	-1.01	1.14	-1.14	-1.23	-1.37	AW464927			Wdr26	WD repeat domain 26	1.18	1.3	1.05	-1.09	1.02	-1.2	-1.11	1.3	AW464927	t15? t240?		Wdr26	WD repeat domain 26	-1.13	1.06	-1.22	1.23	1.23	1.02	1.23	AW464927	t480?
1167	ETV3	ets variant gene 3	1.29	1.14	1.12	1.55	1.36	2.08	1.72	2.08	AW464930			ETV3	ets variant gene 3	1.69	1.25	1.2	2.04	1.43	2.05	1.85	2.05	AW464930	t480? t720?		ETV3	ets variant gene 3	-1.09	-1.07	1.16	-1.01	1.14	1.03	1.16	AW464930
1168	Afap1		-1.06	1.08	-1.08	-1.15	-1.04	1.01	-1.12	-1.15	AW464936	t480?		Afap1		-1.07	1.08	-1.11	-1.17	-1.01	-1.07	-1.25	-1.25	AW464936	t15? t240? t480?		Afap1		-1.03	-1.01	1.01	1.09	1.1	1.08	1.1	AW464936	t15? t60? t120? t240? t480?
1169	ENTPD4	ectonucleoside triphosphate diphosphohydrolase 4	1	-1.12	1.07	1.04	-1.02	1.17	1.01	1.17	AW464938	t120? t720?		ENTPD4	ectonucleoside triphosphate diphosphohydrolase 4	1.02	1.1	1.02	1.23	1.01	1.16	-1.03	1.23	AW464938	t15? t60? t120? t240? t480? t720?		ENTPD4	ectonucleoside triphosphate diphosphohydrolase 4	1.03	-1.15	1.13	-1.1	1.01	1.03	-1.15	AW464938	t30? t60? t120? t480?
1170	PIAS1	protein inhibitor of activated STAT, 1	-1.05	-1.1	1.13	1.07	-1.18	1.13	1.19	1.19	AW464941	t720?		PIAS1	protein inhibitor of activated STAT, 1	-1.13	-1.02	1.24	1.15	1.1	1.06	1.3	1.3	AW464941	t15? t60? t480?		PIAS1	protein inhibitor of activated STAT, 1	1.06	-1.1	1.01	1.04	-1.09	1.14	1.14	AW464941	t30? t60? t120?
1171	Suv420h1	suppressor of variegation 4-20 homolog 1 (Drosophila)	1.05	-1.01	1.2	1.09	-1.02	1.13	1.03	1.2	AW464950	t60?		Suv420h1	suppressor of variegation 4-20 homolog 1 (Drosophila)	-1.02	-1.02	-1.01	1.22	1.05	1.12	1.16	1.22	AW464950	t60? t120?		Suv420h1	suppressor of variegation 4-20 homolog 1 (Drosophila)	1.17	1.1	1.3	1.02	1.02	1	1.3	AW464950	t60? t120? t480?
1172	LOC515159		1.07	1	-1.06	-1.1	-1.03	-1.04	-1.07	-1.1	AW464951	t720?		LOC515159		-1.01	1.1	1.08	-1.02	-1.03	1.03	1.07	1.1	AW464951	t15? t30? t60? t120? t240? t480? t720?		LOC515159		1.12	1.03	-1.1	-1.06	1.1	1.07	1.12	AW464951	t30? t60? t120? t240? t480?
1173	Arid5a	AT rich interactive domain 5A (Mrf1 like)	1.1	-1.23	-1.07	1.17	-1.17	1.3	-1.18	1.3	AW464952			Arid5a	AT rich interactive domain 5A (Mrf1 like)	1.5	-1.1	1.16	1.59	1.07	1.17	1.27	1.59	AW464952			Arid5a	AT rich interactive domain 5A (Mrf1 like)	-1.1	1.07	-1.06	-1.12	-1.01	1.13	1.13	AW464952
1174	AR	androgen receptor	1.08	1.03	2	1.35	-1.7	-1.29	-1.47	2	AW464954	t15? t60?		AR	androgen receptor	-1.56	-1.11	1.33	1.09	-1.25	-1.2	-1.19	-1.56	AW464954			AR	androgen receptor	1.83	1.41	1.77	1.64	-1.13	-1.09	1.83	AW464954
1175	LOC522344		1.07	-1.05	1.11	-1.05	-1.2	1.24	1.21	1.24	AW464957			LOC522344		-1.11	1.21	-1.35	-1.07	1.16	1.16	1.19	-1.35	AW464957			LOC522344		1.23	-1.15	1.48	1.12	-1.23	1.12	1.48	AW464957	t60? t120?
1176	Acp6	acid phosphatase 6, lysophosphatidic (EC:3.1.3.2)	-1.15	1.06	1.04	1.02	1.15	-1.09	-1.2	-1.2	AW464959	t60? t120? t240?		Acp6	acid phosphatase 6, lysophosphatidic (EC:3.1.3.2)	-1.07	1.1	-1.04	1.08	1.01	1	-1.2	-1.2	AW464959	t15? t60? t120? t240? t720?		Acp6	acid phosphatase 6, lysophosphatidic (EC:3.1.3.2)	1.4	1.05	1.05	-1	1.26	1.07	1.4	AW464959	t15? t30? t60? t120? t240? t480?
1177	SMURF2	SMAD specific E3 ubiquitin protein ligase 2	1	-1.03	-1.13	1.1	1.06	1.13	1.31	1.31	AW464965			SMURF2	SMAD specific E3 ubiquitin protein ligase 2	1.12	-1.01	1.02	1.25	-1.03	1.05	1.23	1.25	AW464965			SMURF2	SMAD specific E3 ubiquitin protein ligase 2	1.05	1.1	1.03	-1	1.19	1.13	1.19	AW464965	t60?
1178	EIF4A1	eukaryotic translation initiation factor 4A, isoform 1	-1	1.11	1.49	1.33	-1.19	1.08	1.86	1.86	AW464970			EIF4A1	eukaryotic translation initiation factor 4A, isoform 1	1.18	1.06	1.61	1.08	1.36	-1.04	2.13	2.13	AW464970			EIF4A1	eukaryotic translation initiation factor 4A, isoform 1	-1.15	1.09	1.12	1.55	-1.22	1.1	1.55	AW464970
1179	Slc25a29	solute carrier family 25 (mitochondrial carrier, palmitoylcarnitine transporter), member 29	1.1	1.06	-1.06	1.24	-1.27	1.08	-1	-1.27	AW464974			Slc25a29	solute carrier family 25 (mitochondrial carrier, palmitoylcarnitine transporter), member 29	1.56	1.14	1.14	1.65	1.26	1.12	1.44	1.65	AW464974			Slc25a29	solute carrier family 25 (mitochondrial carrier, palmitoylcarnitine transporter), member 29	-1.01	1.15	1.03	1	-1.32	1	-1.32	AW464974
1180	RBBP7	retinoblastoma binding protein 7	-1.61	-1.01	1.01	1.25	-1.03	1.03	-1.05	-1.61	AW464984			RBBP7	retinoblastoma binding protein 7	-1.13	-1.04	1.1	1.41	-1.04	1.1	-1.26	1.41	AW464984	t480? t720?		RBBP7	retinoblastoma binding protein 7	-1.26	1.15	1.08	1.04	1.13	-1.07	-1.26	AW464984
1181	USP9X	ubiquitin specific peptidase 9, X-linked	1.05	1.02	1.2	-1.1	-1	1.14	1.01	1.2	AW464985			USP9X	ubiquitin specific peptidase 9, X-linked	-1.07	1.02	1.07	1.14	1.13	1.08	1.14	1.14	AW464985			USP9X	ubiquitin specific peptidase 9, X-linked	1.23	1.13	1.29	-1.03	-1.03	1.04	1.29	AW464985
1182	C1orf198		-1.17	1.1	-1.1	-1.01	1.12	-1.29	-1.44	-1.44	AW464986	t240?		C1orf198		-1.05	-1.16	1.27	1.08	1.15	-1.19	1.11	1.27	AW464986			C1orf198		1.22	1.48	-1.12	1.15	1.19	-1.06	1.48	AW464986
1183	Smarca5	SWI/SNF related, matrix associated, actin dependent regulator of chromatin, subfamily a, member 5	-1.14	-1.12	-1.06	1.16	-1.09	-1.12	1.1	1.16	AW464995	t30? t120? t240?		Smarca5	SWI/SNF related, matrix associated, actin dependent regulator of chromatin, subfamily a, member 5	-1.14	1.1	1.21	-1.04	1.2	-1.14	1.47	1.47	AW464995	t120? t720?		Smarca5	SWI/SNF related, matrix associated, actin dependent regulator of chromatin, subfamily a, member 5	1.03	-1.2	-1.09	1.48	-1.06	1.03	1.48	AW464995
1184	Klhl21		1.06	-1.22	1.28	-1.05	-1.47	-1.11	-1.09	-1.47	AW464999	t15? t30?		Klhl21		-1.42	-1.03	-1.06	1.24	1.01	1.1	-1.03	-1.42	AW464999			Klhl21		1.35	-1.05	1.28	-1.09	-1.32	-1.17	1.35	AW464999
1185	NP	nucleoside phosphorylase	1.11	-1.03	1.2	1.03	1.09	1.28	1.34	1.34	AW465001			NP	nucleoside phosphorylase	1.04	-1.01	1.06	1.3	-1.03	1.12	1.16	1.3	AW465001	t60? t120? t240?		NP	nucleoside phosphorylase	1.01	1.05	1.17	-1.12	1.22	1.15	1.22	AW465001	t60? t120? t480?
1186	TMEM92	transmembrane protein 92	1	-1.03	-1	1.05	1.2	-1.21	-1.06	-1.21	AW465005			TMEM92	transmembrane protein 92	-1.19	-1.04	1.07	1.63	1.27	1.11	1.55	1.63	AW465005			TMEM92	transmembrane protein 92	1.21	1.27	1.18	-1.07	1.11	-1.14	1.27	AW465005
1187	TFAP2C	transcription factor AP-2 gamma (activating enhancer binding protein 2 gamma)	1.1	1	-1.08	1.08	1.07	-1.01	1.03	1.1	AW465006			TFAP2C	transcription factor AP-2 gamma (activating enhancer binding protein 2 gamma)	1.06	1.09	-1.07	1.08	-1.01	-1.02	1.23	1.23	AW465006	t15? t60? t120? t240? t480?		TFAP2C	transcription factor AP-2 gamma (activating enhancer binding protein 2 gamma)	1.27	-1.04	-1.05	1.04	1.24	1.05	1.27	AW465006	t15? t60? t120? t480?
1188	LOC511217		1	-1.29	1.19	1.39	-1.05	1.12	-1.05	1.39	AW465007			LOC511217		1.28	-1.22	1.2	1.62	1	1.11	1.47	1.62	AW465007			LOC511217		-1.05	1.15	1.18	1.13	1.15	1.07	1.18	AW465007
1189	Prmt1		1.05	1.15	-1.14	-1.02	1.24	-1.18	1.01	1.24	AW465008	t15? t30? t60? t120? t240?		Prmt1		1.15	1.55	1.15	-1.18	1.07	-1.32	-1.2	1.55	AW465008			Prmt1		1.08	-1.17	1.02	1.4	1.34	1.01	1.4	AW465008
1190	C12orf10		1.16	1.07	-1.33	-1.48	1.27	1.22	-1.23	-1.48	AW465009			C12orf10		1.2	1.15	1.21	-1.35	1.35	1.24	-1.12	1.35	AW465009			C12orf10		1.13	1.15	-1.3	1.22	1.13	1.02	-1.3	AW465009
1191	Rpl41	ribosomal protein L41	-1.77	1.03	-1.28	1.26	1.07	-1.06	-1.4	-1.77	AW465014	t720?		Rpl41	ribosomal protein L41	-1.18	-1.06	1.29	1.31	1.17	1.25	-1.68	-1.68	AW465014			Rpl41	ribosomal protein L41	-1.28	1.34	-1.33	1.29	1.17	-1.34	1.34	AW465014
1192	Pex16	peroxisome biogenesis factor 16	1.08	1.06	-1.05	1.08	1.08	-1.04	-1.06	1.08	AW465015	t15?		Pex16	peroxisome biogenesis factor 16	1.23	-1.02	1.14	1.38	-1.07	1.02	1.17	1.38	AW465015	t15? t120?		Pex16	peroxisome biogenesis factor 16	1.02	1.17	-1.01	-1.09	1.25	1.01	1.25	AW465015	t60? t120? t480?
1193	LOC618128		1	1.04	1.02	-1.08	1.12	1.05	1.06	1.12	AW465021			LOC618128		1.12	1.02	-1.04	1.08	-1.01	1.09	1.09	1.12	AW465021	t15? t30? t60? t120? t240? t480?		LOC618128		-1.01	1.08	1.18	-1.01	1.21	1.06	1.21	AW465021	t30? t60? t120? t480?
1194	Cpne1		-1	-1.08	-1.04	1.17	-1.05	1.07	1.05	1.17	AW465029			Cpne1		1.59	-1.06	1.17	1.43	-1.06	1.15	1.13	1.59	AW465029			Cpne1		-1.32	1.18	-1.02	1.1	1.21	-1.04	-1.32	AW465029
1195	GRAMD3	GRAM domain containing 3	-1.28	1.05	1.1	1.1	1.06	-1.02	-1.08	-1.28	AW465030	t720?		GRAMD3	GRAM domain containing 3	-1.18	1.05	1.1	1.18	1.39	-1	1.49	1.49	AW465030	t15? t60? t120? t240? t480? t720?		GRAMD3	GRAM domain containing 3	1.04	1.03	1.05	1.02	-1.16	1.03	-1.16	AW465030	t15? t60? t120? t480?
1196	RPS6KA3	ribosomal protein S6 kinase, 90kDa, polypeptide 3	1.04	-1.06	-1.35	-1.04	1.19	1.38	-1.06	1.38	AW465031			RPS6KA3	ribosomal protein S6 kinase, 90kDa, polypeptide 3	1.2	1.18	1.03	1.13	1.34	1.07	-1.03	1.34	AW465031			RPS6KA3	ribosomal protein S6 kinase, 90kDa, polypeptide 3	-1.16	-1.1	-1.03	1.1	-1	1.29	1.29	AW465031
1197	THOC4	THO complex 4	-1.04	-1	-1.33	-1.06	1.12	-1	-1.09	-1.33	AW465033	t15? t30? t60? t240? t480? t720?		THOC4	THO complex 4	1.19	1.26	-1.02	-1.02	1.03	-1.1	-1.18	1.26	AW465033	t15? t240? t480? t720?		THOC4	THO complex 4	-1.07	-1.22	-1.26	1.09	1.13	1.14	-1.26	AW465033	t30? t60? t120? t480?
1198	Egln3	EGL nine homolog 3 (C. elegans)	1.26	-1.01	1.57	1.05	-1.14	1.13	1.39	1.57	AW465035	t15? t60?		Egln3	EGL nine homolog 3 (C. elegans)	1.03	1.11	1.22	-1.04	1.08	1.06	1.86	1.86	AW465035	t120? t720?		Egln3	EGL nine homolog 3 (C. elegans)	1.18	-1	1.33	1.21	-1.06	1.11	1.33	AW465035	t60? t120?
1199	Gpiap1		-1.24	1.09	-1.51	1.04	1.02	1.1	-1.18	-1.51	AW465052			Gpiap1		1.15	-1.03	1.1	1.19	1.11	1.04	-1.23	-1.23	AW465052			Gpiap1		-1.11	1.28	-1.23	1.12	1.12	-1.02	1.28	AW465052
1200	LOC537675		1.14	-1.03	-1.12	1.15	-1.23	-1.08	-1.06	-1.23	AW465053	t240?		LOC537675		1.23	-1.14	1.07	1.16	-1.14	-1.03	1.17	1.23	AW465053			LOC537675		1.12	1.19	-1.17	1.1	1.07	-1	1.19	AW465053	t60? t480?
1201	Krtcap2	keratinocyte associated protein 2	-1.15	-1.03	-1.04	1.01	1.14	-1.13	-1.27	-1.27	AW465056			Krtcap2	keratinocyte associated protein 2	-1.01	-1.14	1.15	1.08	1.25	-1.06	1.01	1.25	AW465056			Krtcap2	keratinocyte associated protein 2	1.37	1.26	1.07	1.14	1.09	-1.1	1.37	AW465056
1202	Usp15	ubiquitin specific peptidase 15	1.14	1.13	1.08	1.11	-1.01	1.24	1.13	1.24	AW465059			Usp15	ubiquitin specific peptidase 15	1.04	1.04	1.16	1.12	-1	1.09	1.3	1.3	AW465059			Usp15	ubiquitin specific peptidase 15	1.11	1.15	1.05	1.13	1.08	1.11	1.15	AW465059
1203	KRT15		-1.01	-1.13	-1.52	-1.56	1.03	1	1.64	1.64	AW465060			KRT15		-1.07	1.43	-1.18	-1.57	-1.05	-1.27	-1.14	-1.57	AW465060			KRT15		1.18	-1.51	-1.2	1.12	1.3	1.24	-1.51	AW465060	t120?
1204	FAM103A1	family with sequence similarity 103, member A1	-1.26	1.04	1.06	1.08	1.24	1.09	1.18	-1.26	AW465061	t15?		FAM103A1	family with sequence similarity 103, member A1	-1.1	-1.05	1.06	1.22	1.14	1.17	-1.2	1.22	AW465061	t60? t240? t480? t720?		FAM103A1	family with sequence similarity 103, member A1	-1.07	1.17	1.11	1.02	1.09	-1.02	1.17	AW465061	t60? t480?
1205	Snx12	sorting nexin 12	1.09	-1.02	-1.14	-1.07	1.1	-1.12	-1.07	-1.14	AW465072			Snx12	sorting nexin 12	1	-1.11	1.13	1.18	1.01	-1.05	1.03	1.18	AW465072			Snx12	sorting nexin 12	1.3	1.22	-1.06	-1.04	1.22	-1.06	1.3	AW465072
1206	Tnfaip8	tumor necrosis factor, alpha-induced protein 8	-1.05	1.07	-1.13	1.01	1.21	1.08	-1.52	-1.52	AW465089			Tnfaip8	tumor necrosis factor, alpha-induced protein 8	1.26	1.06	1.23	1.12	1.31	1.04	-1.06	1.31	AW465089	t15?		Tnfaip8	tumor necrosis factor, alpha-induced protein 8	1.26	1.19	-1.1	1.08	1.08	1.12	1.26	AW465089
1207	Sgce	sarcoglycan, epsilon	1.1	-1.05	1.01	1	1.05	-1.32	1.05	-1.32	AW465090	t15? t240? t480? t720?		Sgce	sarcoglycan, epsilon	1.09	1	-1.03	-1.13	1.05	-1.11	1.31	1.31	AW465090	t15? t60? t120? t240? t480? t720?		Sgce	sarcoglycan, epsilon	1.32	-1	1.05	1.18	1.19	-1.06	1.32	AW465090	t15? t30? t60? t120? t240? t480?
1208	Kcnt2	potassium channel, subfamily T, member 2	1.1	-1.05	1.03	1.05	-1.07	-1.02	1.04	1.1	AW465093	t60? t240? t720?		Kcnt2	potassium channel, subfamily T, member 2	1.11	1.01	-1.04	1	-1.04	-1.02	1.38	1.38	AW465093	t15? t60? t120? t240? t480?		Kcnt2	potassium channel, subfamily T, member 2	1.07	1	1.04	1.11	1.13	1.03	1.13	AW465093	t30? t60? t120? t240? t480?
1209	S100a14	S100 calcium binding protein A14	1.26	1.04	1.55	1.23	1.17	1.63	1.64	1.64	AW465094			S100a14	S100 calcium binding protein A14	-1.09	1.02	-1.01	1.07	1.33	1.19	1.41	1.41	AW465094			S100a14	S100 calcium binding protein A14	1.39	1.21	1.66	1.38	-1.02	1.41	1.66	AW465094
1210	CTBP1	C-terminal binding protein 1	1.28	1.05	-1.07	1.22	-1.23	1.2	1.05	1.28	AW465104			CTBP1	C-terminal binding protein 1	1.31	-1.13	1.15	1.39	-1.11	1.17	1.59	1.59	AW465104			CTBP1	C-terminal binding protein 1	1.28	1.41	1.05	1.27	1.13	1.03	1.41	AW465104
1211	TMEM110		1.03	-1.03	1.19	-1.04	1	1.06	-1.13	1.19	AW465110			TMEM110		1.06	-1.05	1.01	1.18	1.04	1.17	1.06	1.18	AW465110	t60?		TMEM110		1.07	1.07	1.28	-1.07	1.06	-1.02	1.28	AW465110	t60?
1212	Mrps18c	mitochondrial ribosomal protein S18C	-1.09	1.07	-1.21	1.07	-1.16	1.15	-1.11	-1.21	AW465111			Mrps18c	mitochondrial ribosomal protein S18C	1.1	1.07	1.07	1.3	-1.19	1.17	1.05	1.3	AW465111			Mrps18c	mitochondrial ribosomal protein S18C	-1.01	1.1	-1.03	1.03	1.21	-1.03	1.21	AW465111
1213	Mycbp	c-myc binding protein	-1.28	-1.03	-1.17	-1.02	1.04	1.26	1.28	1.28	AW465115			Mycbp	c-myc binding protein	-1.04	1	1.01	1.06	1.17	1.09	1.05	1.17	AW465115			Mycbp	c-myc binding protein	-1.04	1.12	-1.01	1.1	-1.03	1.16	1.16	AW465115
1214	TRIP12	thyroid hormone receptor interactor 12	1.03	1.13	1.37	1.11	1.11	1.35	1.05	1.37	AW465123	t60?		TRIP12	thyroid hormone receptor interactor 12	-1.02	1.06	1.15	1.1	1.35	1.16	1.23	1.35	AW465123	t60?		TRIP12	thyroid hormone receptor interactor 12	1.19	1.15	1.4	1.28	-1.06	1.13	1.4	AW465123
1215	Nola3	nucleolar protein family A, member 3	-1.01	1.04	-1.3	-1.11	1.22	1.09	1.01	-1.3	AW465127			Nola3	nucleolar protein family A, member 3	1.02	-1.01	1.04	-1	1.2	1.07	-1.13	1.2	AW465127			Nola3	nucleolar protein family A, member 3	1.03	1.18	-1.05	1.11	1.08	1.05	1.18	AW465127
1216	Lrba	LPS-responsive vesicle trafficking, beach and anchor containing	-1.11	1.1	-1.05	-1.02	1.19	1.05	1.03	1.19	AW465129			Lrba	LPS-responsive vesicle trafficking, beach and anchor containing	1.18	1.04	-1.03	1.18	1.1	1.07	-1.06	1.18	AW465129	t15? t60? t240? t480? t720?		Lrba	LPS-responsive vesicle trafficking, beach and anchor containing	-1.21	1.17	1.08	-1.03	1.13	1.12	-1.21	AW465129	t15? t60? t120? t480?
1217	LOC51136		1.02	1.25	-1.42	1.14	1.27	1.5	1.68	1.68	AW465133			LOC51136		1.2	1.17	-1.02	1.4	1.16	1.26	1.36	1.4	AW465133			LOC51136		1.07	1.22	-1.02	1.07	1.29	1.15	1.29	AW465133
1218	AW465136		-1.04	1.07	-1.48	-1.24	1.09	-1.06	-1.01	-1.48	AW465136			AW465136		1.08	1.1	-1.19	1.06	1.04	1.08	-1.04	-1.19	AW465136	t60? t240? t480? t720?		AW465136		-1.01	1.01	-1.04	-1.06	1.08	-1.05	1.08	AW465136	t60? t480?
1219	AP2S1	adaptor-related protein complex 2, sigma 1 subunit	1.04	1.03	1.35	1.16	1	1.03	-1.03	1.35	AW465141			AP2S1	adaptor-related protein complex 2, sigma 1 subunit	1.18	-1.16	1.3	1.39	1.13	1.09	1.48	1.48	AW465141			AP2S1	adaptor-related protein complex 2, sigma 1 subunit	1.14	1.37	1.22	1.1	1.09	-1.06	1.37	AW465141
1220	AW465144		1	-1.08	1.02	1.1	-1.03	-1.01	-1.02	1.1	AW465144	t30? t60? t240? t480?		AW465144		1.05	-1.06	1.09	1.01	-1.16	1.03	1.15	-1.16	AW465144	t15? t30? t60? t120? t240? t480?		AW465144		1.15	1.07	-1.04	1.09	1.23	1.05	1.23	AW465144	t30? t60? t120? t240? t480?
1221	LOC339929		1.39	1.1	-1.09	1.07	-1.15	1.07	1.16	1.39	AW465145			LOC339929		1.2	1.32	-1.07	1.57	1.28	1.06	1.67	1.67	AW465145	t720?		LOC339929		1.25	-1.03	1.08	-1.16	-1.28	1.06	-1.28	AW465145
1222	LOC515718		-1.03	1.09	-1.36	-1.11	1.24	1.22	-1.11	-1.36	AW465147			LOC515718		-1.02	1.26	1.01	-1.04	1.29	1.15	1.06	1.29	AW465147			LOC515718		1.05	1.06	-1.1	1.25	1.17	1.09	1.25	AW465147
1223	Gas2l1	growth arrest-specific 2 like 1	-1.05	1.2	-1.42	1.08	1.42	1.05	-1.72	-1.72	AW465148			Gas2l1	growth arrest-specific 2 like 1	1.11	1.22	1.15	1.23	1.35	1.01	-1.19	1.35	AW465148			Gas2l1	growth arrest-specific 2 like 1	1.11	1.21	-1.3	1.18	1.28	1.08	-1.3	AW465148
1224	MDS032		-1.08	1.1	-1.68	-1.73	1.17	1.12	-1.17	-1.73	AW465155			MDS032		1.09	1.48	-1.03	-1.5	1.11	1.08	-1.37	-1.5	AW465155			MDS032		-1.02	-1.31	-1.33	1.09	1.11	1.09	-1.33	AW465155
1225	SHOX2	short stature homeobox 2	1.12	1.04	-1.13	1.06	1	-1.2	-1.36	-1.36	AW465157	t15?		SHOX2	short stature homeobox 2	1.26	1.16	1.01	1.31	-1.09	-1.1	1.32	1.32	AW465157			SHOX2	short stature homeobox 2	-1.03	1.08	-1.07	-1	1.26	-1.04	1.26	AW465157
1226	RPL15	ribosomal protein L15	1.45	-1.13	1.48	1.2	1.04	1.23	-1.05	1.48	AW465159			RPL15	ribosomal protein L15	1.19	1.08	1.25	1.44	-1.02	1.21	1.03	1.44	AW465159			RPL15	ribosomal protein L15	1.19	1.01	1.48	1.13	1.28	1.06	1.48	AW465159
1227	TNFAIP3	tumor necrosis factor, alpha-induced protein 3	1.14	1.05	1.18	1.27	1.1	1.17	-1.16	1.27	AW465161			TNFAIP3	tumor necrosis factor, alpha-induced protein 3	-1.24	1.3	1.01	1.56	1.84	1.21	1.16	1.84	AW465161			TNFAIP3	tumor necrosis factor, alpha-induced protein 3	1.62	-1	1.43	1.09	-1.38	1	1.62	AW465161
1228	PPTC7		-1.04	1.1	-1.2	1.12	1.05	1.08	-1.01	-1.2	AW465162	t240? t480? t720?		PPTC7		1.08	1.12	1.1	1.14	1.01	1.06	1.01	1.14	AW465162	t240? t480?		PPTC7		1.11	1.11	-1.11	1.08	1.17	1.04	1.17	AW465162	t60? t480?
1229	2010-03-06		-1.1	1.05	1.1	-1.13	-1.23	-1.21	1.08	-1.23	AW465164	t15? t240? t720?		2010-03-06		-1.04	1.38	1.08	-1.21	1.05	-1.24	-1.07	1.38	AW465164	t120? t480? t720?		2010-03-06		-1.03	-1.21	1.08	1.25	-1.13	1.07	1.25	AW465164	t15? t60? t120? t480?
1230	CEBPG	CCAAT/enhancer binding protein (C/EBP), gamma	-1.14	1.14	-1.31	-1.01	1.35	1.2	1.29	1.35	AW465166			CEBPG	CCAAT/enhancer binding protein (C/EBP), gamma	1.21	1	1.01	1.26	1.33	1.13	1.17	1.33	AW465166	t15?		CEBPG	CCAAT/enhancer binding protein (C/EBP), gamma	-1.19	1.27	-1.05	-1.03	1.07	1.08	1.27	AW465166
1231	CTNNA1	catenin (cadherin-associated protein), alpha 1, 102kDa	1.04	1.07	1.33	1.04	-1.17	-1.16	1.16	1.33	AW465169	t15? t30? t60? t120? t240?		CTNNA1	catenin (cadherin-associated protein), alpha 1, 102kDa	-1.23	-1.01	1.08	1.04	1.35	-1.23	1.42	1.42	AW465169	t15?		CTNNA1	catenin (cadherin-associated protein), alpha 1, 102kDa	1.24	1.12	1.37	1.19	-1.32	-1.01	1.37	AW465169	t480?
1232	Ccdc5	coiled-coil domain containing 5	1.27	1.04	1.17	1.01	-1.45	-1.18	1.01	-1.45	AW465173			Ccdc5	coiled-coil domain containing 5	-1.15	-1.06	1.18	1.14	-1.03	-1.24	1.44	1.44	AW465173	t30?		Ccdc5	coiled-coil domain containing 5	1.36	1.24	1.08	-1.02	-1.2	1.06	1.36	AW465173	t30? t120? t480?
1233	Tmem167		-1.21	-1.02	-1.32	-1.2	1.21	-1.08	1.07	-1.32	AW465174	t480?		Tmem167		1.22	1.14	-1.06	-1.03	1.25	1.06	-1.06	1.25	AW465174			Tmem167		-1.24	-1.02	1.01	1.16	1.03	1.21	-1.24	AW465174	t480?
1234	Hspc171	transmembrane protein 208	1.06	1.04	-1.18	-1.09	1.13	1.11	-1.2	-1.2	AW465175			Hspc171	transmembrane protein 208	1.26	1.05	1.13	-1.14	-1.06	1.09	1.01	1.26	AW465175			Hspc171	transmembrane protein 208	1.16	1.09	-1.09	1.2	1.34	1.03	1.34	AW465175	t15?
1235	LOC531942		1.01	1.06	-1.13	-1.07	1.19	1.22	1.19	1.22	AW465178	t720?		LOC531942		1.17	1.12	1.01	1.11	1.16	1.15	1.16	1.17	AW465178	t15? t60? t240? t480?		LOC531942		-1.04	-1.02	-1.07	-1.03	1.12	1.1	1.12	AW465178	t30? t60? t120? t480?
1236	Tmprss4	transmembrane protease, serine 4	1.16	-1.09	-1.28	-1.31	-1.07	-1.05	-1.13	-1.31	AW465181			Tmprss4	transmembrane protease, serine 4	1.36	1.3	-1.13	-1.27	-1.17	-1.03	-1.14	1.36	AW465181	t480?		Tmprss4	transmembrane protease, serine 4	-1.13	-1.4	1.04	1.14	1.2	-1	-1.4	AW465181	t60? t480?
1237	LOC618893		-1.07	-1.11	1.12	-1.08	-1.16	-1.08	1.23	1.23	AW465184	t720?		LOC618893		-1.06	1	1.03	1.21	-1.06	-1.02	1.16	1.21	AW465184	t15? t120? t240? t480? t720?		LOC618893		1.18	-1.12	1.09	-1.27	-1.01	1.02	-1.27	AW465184	t15? t30? t60? t120? t240? t480?
1238	MPST	mercaptopyruvate sulfurtransferase	1.11	1.1	1.11	-1.27	-1.08	-1.27	1.11	-1.27	AW465190			MPST	mercaptopyruvate sulfurtransferase	-1.09	1.32	-1.03	-1.28	1.15	-1.04	1.12	1.32	AW465190			MPST	mercaptopyruvate sulfurtransferase	1.34	-1.07	1.26	1.12	-1.1	-1.2	1.34	AW465190	t60? t120?
1239	AXL	AXL receptor tyrosine kinase (EC:2.7.10.1)	1.24	-1.01	1.21	1.19	-1.38	-1.14	1.21	-1.38	AW465195	t15? t120?		AXL	AXL receptor tyrosine kinase (EC:2.7.10.1)	1.16	1.14	1.21	1.21	1.07	-1.1	1.97	1.97	AW465195			AXL	AXL receptor tyrosine kinase (EC:2.7.10.1)	1.14	1.06	1.15	1.15	-1.23	1	-1.23	AW465195
1240	Cep63		1.02	-1.06	-1.3	-1.07	1.06	-1.03	-1.08	-1.3	AW465203	t720?		Cep63		1.34	1.18	1.07	-1	1.1	-1.04	-1.01	1.34	AW465203	t15? t60? t240? t480? t720?		Cep63		-1.24	-1.12	-1.21	1.02	-1.01	1.05	-1.24	AW465203	t30? t60? t120? t240? t480?
1241	Pqlc3	PQ loop repeat containing	-1.16	1.18	-1.49	-1.21	1.22	1.11	-1	-1.49	AW465208			Pqlc3	PQ loop repeat containing	1.12	1.5	-1.02	-1.14	1.28	-1.05	-1.41	1.5	AW465208	t240? t480? t720?		Pqlc3	PQ loop repeat containing	-1.28	-1.14	-1.2	1.13	1.01	1.2	-1.28	AW465208	t480?
1242	Josd3	Josephin domain containing 3	1.24	1.24	-1.31	-1.16	1.13	1.29	-1.13	-1.31	AW465210			Josd3	Josephin domain containing 3	1.28	1.38	-1.03	1.17	-1.08	1.2	-1.19	1.38	AW465210			Josd3	Josephin domain containing 3	-1.01	1.04	1.04	-1	1.37	1.04	1.37	AW465210
1243	ZNF289		1.12	1.17	1.26	-1.06	-1.27	-1.07	-1.49	-1.49	AW465213			ZNF289		1.32	1.1	1.16	1.35	1.23	1.13	1.09	1.35	AW465213			ZNF289		1.09	1.23	1.34	-1.17	-1.21	-1.09	1.34	AW465213
1244	MGA	MAX gene associated	-1.1	1.05	1.1	1.13	-1.07	1.08	1.11	1.13	AW465215	t720?		MGA	MAX gene associated	1.05	1	1.14	1.25	-1.19	1.13	1.4	1.4	AW465215	t15? t60? t120? t240? t720?		MGA	MAX gene associated	1.05	1.13	1.1	1	1.27	1	1.27	AW465215	t30? t60? t120? t480?
1245	GSTZ1	glutathione transferase zeta 1 (maleylacetoacetate isomerase)	1.14	-1.09	1.54	-1.16	-1.77	-1.14	1.04	-1.77	AW465225			GSTZ1	glutathione transferase zeta 1 (maleylacetoacetate isomerase)	-1.24	-1.11	1.13	1.02	-1.22	-1.02	1.56	1.56	AW465225			GSTZ1	glutathione transferase zeta 1 (maleylacetoacetate isomerase)	1.38	1.25	1.61	1.12	-1.2	-1.07	1.61	AW465225
1246	Cwf19l1		1.19	1.06	1.04	1.08	-1.02	1.09	1.2	1.2	AW465228			Cwf19l1		1.1	1.02	1.16	1.4	-1	1.12	1.49	1.49	AW465228			Cwf19l1		1.17	1.18	1	-1.09	1.14	-1	1.18	AW465228	t120?
1247	NDUFB8	NADH dehydrogenase (ubiquinone) 1 beta subcomplex 8	-1.08	-1	1.32	-1.18	1.13	1.03	-1.08	1.32	AW465229			NDUFB8	NADH dehydrogenase (ubiquinone) 1 beta subcomplex 8	1.03	1.04	1.08	1.14	1.28	1.18	1.32	1.32	AW465229			NDUFB8	NADH dehydrogenase (ubiquinone) 1 beta subcomplex 8	1.21	1.17	1.54	1.11	1.07	-1.09	1.54	AW465229
1248	Plekhk1		1.17	1.44	-1.04	-1.13	1.08	1.03	-1.06	1.44	AW465238			Plekhk1		1.34	1.21	1.08	1	1.12	1.07	-1.06	1.34	AW465238	t15? t30? t60? t240? t480? t720?		Plekhk1		-1.17	1.29	-1.02	1.01	-1	1.01	1.29	AW465238	t30? t60? t480?
1249	PPP6C	protein phosphatase 6, catalytic subunit	1.11	1.12	1.01	1.14	-1.04	1.2	1.2	1.2	AW465240			PPP6C	protein phosphatase 6, catalytic subunit	1.01	1.12	1.35	1.36	1.02	1.14	1.26	1.36	AW465240			PPP6C	protein phosphatase 6, catalytic subunit	1.15	1.16	-1.07	1.04	1.06	1.01	1.16	AW465240
1250	STX6	syntaxin 6	1.01	1.03	1.01	1.03	1.11	-1.25	1.01	-1.25	AW465249	t15? t30? t60? t120? t240? t480? t720?		STX6	syntaxin 6	-1	1	1.07	-1.15	1.21	-1.09	1.11	1.21	AW465249	t15? t30? t60? t120? t240? t480?		STX6	syntaxin 6	1.14	1.12	-1.02	1.23	1.01	-1.09	1.23	AW465249	t15? t30? t60? t120? t240? t480?
1251	LOC510499		1.44	1.39	-1.21	1.26	1.3	1.09	-1.46	-1.46	AW465254			LOC510499		1.45	1.46	1.2	1.15	1.33	-1.04	-1.03	1.46	AW465254			LOC510499		1.07	1.17	-1.2	1.47	1.18	1.17	1.47	AW465254
1252	ANAPC5	anaphase promoting complex subunit 5	-1.01	-1.05	-1.01	-1.06	-1.08	-1.3	-1.02	-1.3	AW465257	t720?		ANAPC5	anaphase promoting complex subunit 5	-1.05	1.03	1	-1.05	-1.02	-1.17	1	-1.17	AW465257	t15? t60? t120? t240? t480? t720?		ANAPC5	anaphase promoting complex subunit 5	1.08	-1.04	1.01	1.04	1.06	-1.06	1.08	AW465257	t15? t30? t60? t120? t240? t480?
1253	Myoz1	myozenin 1	1.28	-1.02	1.14	-1.43	1.06	1.05	1.22	-1.43	AW465261	t15?		Myoz1	myozenin 1	1.03	-1.01	-1.23	-1.17	1.27	1.04	1.33	1.33	AW465261			Myoz1	myozenin 1	1.19	1.08	1.35	1	-1.11	1.12	1.35	AW465261
1254	AW465262		1.45	-1.28	1.55	1.06	1.05	-1.07	1.25	1.55	AW465262			ZBTB47	Transcribed locus, strongly similar to NP_660149.1 zinc finger protein 651 [Homo sapiens]	1.3	-1.27	1.41	1.35	-1.12	1.08	1.32	1.41	AW465262			AW465262		1.31	1.22	1.34	1.04	1.41	-1.1	1.41	AW465262
1255	LOC526885		1.11	-1.26	-1.04	-1.02	1.17	1.01	-1.7	-1.7	AW465264			LOC526885		1.2	-1.11	1.26	1.34	1.03	1.09	1.08	1.34	AW465264			LOC526885		1.23	1.16	-1.01	-1	1.39	-1.01	1.39	AW465264
1256	Qpctl	glutaminyl-peptide cyclotransferase-like	1.15	1.05	1.2	-1.22	1.14	1.09	1.06	-1.22	AW465265			Qpctl	glutaminyl-peptide cyclotransferase-like	-1.03	-1.01	1.04	1.02	1.2	1.25	1.45	1.45	AW465265			Qpctl	glutaminyl-peptide cyclotransferase-like	1.13	1.12	1.25	1.03	1.03	-1.06	1.25	AW465265
1257	2010-09-08		1.1	-1.22	1.19	1	1.04	-1.14	-1.04	-1.22	AW465267			2010-09-08		1.06	-1.09	1.26	1	1.25	-1.07	-1.16	1.26	AW465267	t720?		2010-09-08		1.13	-1.02	1.13	1.16	-1.13	-1.02	1.16	AW465267
1258	Peg3	paternally expressed 3	1.02	-1.41	1.23	1.09	-1.21	-1.09	-1.01	-1.41	AW465268	t15? t30? t60? t120? t240? t480?		Peg3	paternally expressed 3	-1.08	-1.36	-1.07	1.03	1.09	-1.34	1.47	1.47	AW465268	t60? t120? t240? t480? t720?		Peg3	paternally expressed 3	1.28	1.07	1.36	1.05	-1.14	1.18	1.36	AW465268	t60? t120? t480?
1259	Aak1		1.26	-1.2	1.22	1.19	1	-1.07	1.22	1.26	AW465274			Aak1		-1.04	-1.08	1.05	1.08	-1.03	-1.04	1.48	1.48	AW465274	t120?		Aak1		1.31	-1.07	1.24	1.22	1.2	1.01	1.31	AW465274
1260	Srgn		-1.05	1.33	-1.33	-1.09	1.55	5.31	6.8	6.8	AW465275			Srgn		1.2	1.41	1.05	1.96	-1.04	2.96	2.77	2.96	AW465275			Srgn		1.02	1.15	1.05	-1.44	1.98	1.63	1.98	AW465275
1261	Eif2b2	eukaryotic translation initiation factor 2B, subunit 2 beta	1.14	-1.12	-1.3	-1.03	1.12	1.05	-1.15	-1.3	AW465276			Eif2b2	eukaryotic translation initiation factor 2B, subunit 2 beta	1.41	1.11	1.24	1.1	1.14	1.05	1.15	1.41	AW465276			Eif2b2	eukaryotic translation initiation factor 2B, subunit 2 beta	1.13	1	-1.19	1.1	1.21	1.05	1.21	AW465276
1262	Nvl	nuclear VCP-like	-1.04	1.03	1.03	1.08	-1.1	-1.22	-1.09	-1.22	AW465277	t720?		Nvl	nuclear VCP-like	-1.1	-1.01	-1.08	-1.08	1.12	-1.18	-1.07	-1.18	AW465277	t15? t60? t120? t240? t480? t720?		Nvl	nuclear VCP-like	1.18	1.06	1.13	1.21	-1.06	1.03	1.21	AW465277	t15? t30? t60? t120? t240? t480?
1263	Klhl20		1.09	-1.08	1.05	1.07	1.07	-1.02	-1.01	1.09	AW465280	t30? t720?		Klhl20		1.02	-1.04	1.04	1.2	-1.05	1.05	1.08	1.2	AW465280	t15? t60? t120? t240? t480?		Klhl20		1.11	1.05	1.07	-1.04	1.2	-1	1.2	AW465280	t60? t120? t240? t480?
1264	Anapc13	anaphase promoting complex subunit 13	-1.1	1.03	1	-1.05	1.07	-1.41	-1.14	-1.41	AW465283	t240? t480? t720?		Anapc13	anaphase promoting complex subunit 13	-1.08	1.31	1.11	-1.23	1.24	-1.26	-1.13	1.31	AW465283	t15? t30? t60? t120? t240? t480? t720?		Anapc13	anaphase promoting complex subunit 13	1.04	-1.16	-1.02	1.31	-1.06	-1.03	1.31	AW465283	t15? t30? t60? t120? t480?
1265	Hsbp1	heat shock factor binding protein 1	1.02	-1.08	1.08	-1	-1.13	1.06	-1.11	-1.13	AW465284			Hsbp1	heat shock factor binding protein 1	-1.07	-1.02	1.06	1.16	1.24	1.02	1.07	1.24	AW465284	t480?		Hsbp1	heat shock factor binding protein 1	1.25	1.05	1.13	1.04	-1.25	1.02	1.25	AW465284
1266	Sh3glb1	SH3-domain GRB2-like B1 (endophilin)	-1.05	1.14	-1.39	-1.01	1.49	1.42	1.2	1.49	AW465287			Sh3glb1	SH3-domain GRB2-like B1 (endophilin)	1.28	1.16	-1.11	1.05	1.37	1.13	1.03	1.37	AW465287			Sh3glb1	SH3-domain GRB2-like B1 (endophilin)	-1.36	1.11	1.06	1.23	1.13	1.24	-1.36	AW465287
1267	HSPC159		-1.03	1.1	-1.29	-1.09	-1.12	-1.15	-1.13	-1.29	AW465293			HSPC159		1.27	1.03	1.11	1.06	-1.02	-1.06	-1.06	1.27	AW465293	t15?		HSPC159		1.01	1.2	-1.18	-1.01	1.06	1.01	1.2	AW465293	t480?
1268	Slc17a7		1.78	-1.09	2.05	1.54	-1.19	-1.15	1.22	2.05	AW465294	t15? t60?		Slc17a7		1.45	-1.23	1.52	1.11	-1.08	-1.16	1.5	1.52	AW465294	t60? t120?		Slc17a7		1.25	1.38	1.45	1.47	1.12	1.03	1.47	AW465294
1269	LOC729756		1.05	-1.1	1.11	1.09	-1.03	1	1.07	1.11	AW465296	t720?		LOC729756		1.13	1.07	1.04	-1.11	-1.02	1.06	1.1	1.13	AW465296	t15? t60? t120? t240? t480? t720?		LOC729756		1.05	-1.08	1.08	1.25	1.06	1.03	1.25	AW465296	t30? t60? t120? t240? t480?
1270	LOC512324		1.1	1.2	-1.71	1.13	1.1	1.1	-1.22	-1.71	AW465300			LOC512324		1.24	1.2	1.06	1.74	-1.08	1.13	-1.17	1.74	AW465300			LOC512324		1.13	1.23	-1.45	-1.15	1.43	1.01	-1.45	AW465300
1271	ANXA8	annexin A8-like 2	1.59	-1.29	1.21	1.27	1.21	-1.29	1.09	1.59	AW465301	t15? t30? t60?		ANXA8	annexin A8-like 2	1.39	-1.27	1.3	1.14	1.19	-1.11	1.45	1.45	AW465301			ANXA8	annexin A8-like 2	1.15	1.15	1.21	1.35	1.18	-1.2	1.35	AW465301
1272	Lpp		1.02	1.22	-1.23	1.19	1.16	1.12	1.08	-1.23	AW465307	t720?		Lpp		-1.04	1.54	1.1	1.83	-1.33	1.4	-1.02	1.83	AW465307	t720?		Lpp		1	-1.16	1	-1.08	1.87	-1.21	1.87	AW465307
1273	MED12		1.26	-1.25	-1.03	1.21	-1.04	1.06	1.01	1.26	AW465310			MED12		1.11	1.09	-1.03	1.75	1.2	1.18	1.17	1.75	AW465310			MED12		1.44	-1.11	1.22	-1.08	-1.03	-1.06	1.44	AW465310
1274	LOC512304		1.15	-1.01	1.01	-1.09	1.05	-1.03	1.04	1.15	AW465311	t720?		LOC512304		1.37	1.04	1.05	-1.1	-1.04	1	1.05	1.37	AW465311	t15? t60? t240? t480?		LOC512304		-1	-1.12	-1.02	1.03	1.18	1.05	1.18	AW465311	t15? t30? t60? t120? t240? t480?
1275	HERC1	hect (homologous to the E6-AP (UBE3A) carboxyl terminus) domain and RCC1 (CHC1)-like domain (RLD) 1	-1.03	1.13	-1.33	-1.17	1.06	-1.05	1.01	-1.33	AW465321	t15? t30? t60? t240? t480? t720?		HERC1	hect (homologous to the E6-AP (UBE3A) carboxyl terminus) domain and RCC1 (CHC1)-like domain (RLD) 1	1.17	1.34	-1.05	-1.28	1.1	-1.12	-1.04	1.34	AW465321	t15? t240? t480?		HERC1	hect (homologous to the E6-AP (UBE3A) carboxyl terminus) domain and RCC1 (CHC1)-like domain (RLD) 1	1.02	-1.11	-1.14	1.28	1.07	1.08	1.28	AW465321	t15? t60? t120? t240? t480?
1276	LOC785180		1.04	-1.02	1.01	1.07	-1.14	-1.17	1.11	-1.17	AW465334	t240? t720?		LOC785180		-1	1.04	1.02	1.05	1.01	-1.05	1.17	1.17	AW465334	t15? t60? t120? t240? t480?		LOC785180		1.13	1	-1.03	1.01	-1.02	-1.03	1.13	AW465334	t15? t30? t60? t120? t240? t480?
1277	Tgif1		1.01	-1.09	-1.15	-1.15	1.43	1.22	1.28	1.43	AW465340	t480?		Tgif1		1.44	1.3	1.03	-1.18	1.4	1.1	-1.09	1.44	AW465340	t15? t120? t240? t480? t720?		Tgif1		-1.06	-1.26	1.01	1.22	1.08	1.11	-1.26	AW465340	t15? t30? t60? t480?
1278	IL22RA1	interleukin 22 receptor, alpha 1	-1.29	1.07	-1.75	-1.32	1.08	-1.33	-1.04	-1.75	AW465344	t60? t240? t480? t720?		IL22RA1	interleukin 22 receptor, alpha 1	-1.04	1.58	-1.29	-1.01	1.21	-1.22	1.01	1.58	AW465344	t240? t480?		IL22RA1	interleukin 22 receptor, alpha 1	-1.05	-1.37	-1.22	-1.11	-1.14	1.04	-1.37	AW465344	t30? t60? t120? t240? t480?
1279	Wdr18	WD repeat domain 18	1.03	-1.16	1.18	-1.15	-1.44	-1.16	-1	-1.44	AW465345	t15? t30?		Wdr18	WD repeat domain 18	-1.54	1.02	-1.03	-1.02	1.01	-1.03	1.53	-1.54	AW465345			Wdr18	WD repeat domain 18	1.53	1	1.24	1.01	-1.26	-1.09	1.53	AW465345
1280	Mbnl3	muscleblind-like 3 (Drosophila)	1.06	-1.08	-1.04	1.04	-1.02	1.34	-1.36	-1.36	AW465346	t720?		Mbnl3	muscleblind-like 3 (Drosophila)	1.23	1.2	1.08	1.36	-1.26	1.41	-1.28	1.41	AW465346			Mbnl3	muscleblind-like 3 (Drosophila)	1.13	-1.12	1.09	-1.06	1.44	-1.02	1.44	AW465346
1281	Tegt	testis enhanced gene transcript	-1.13	1.16	-1.64	1.02	1.17	-1.04	-1.62	-1.64	AW465347	t15?		Tegt	testis enhanced gene transcript	1.32	1.14	1.12	-1.05	1.13	1.02	-1.71	-1.71	AW465347	t480?		Tegt	testis enhanced gene transcript	-1.21	1.14	-1.45	1.26	1.08	-1.07	-1.45	AW465347	t15? t480?
1282	Birc6	baculoviral IAP repeat-containing 6	-1.24	1.05	1.2	-1.01	-1.27	-1.1	-1.26	-1.27	AW465363	t720?		Birc6	baculoviral IAP repeat-containing 6	-1.25	1.25	1.1	-1.17	-1.03	-1.07	-1.21	1.25	AW465363	t15? t120? t240? t480? t720?		Birc6	baculoviral IAP repeat-containing 6	1.04	-1.07	1.12	1.29	-1.11	-1.03	1.29	AW465363	t60? t120? t240? t480?
1283	ECSM2		-1.11	1.01	1.1	1.11	-1.06	1.41	1.25	1.41	AW465367	t15? t30? t60? t120? t240? t480? t720?		ECSM2		-1.01	1.19	-1.2	1.14	1.21	1.12	1.16	1.21	AW465367	t15? t60? t240? t480?		ECSM2		-1.14	-1.15	1.26	1.04	-1.17	1.3	1.3	AW465367	t15? t30? t60? t120? t240? t480?
1284	Pnpt1	polyribonucleotide nucleotidyltransferase 1	-1.09	1.02	1.04	1.21	1.28	1.63	1.34	1.63	AW465370	t720?		Pnpt1	polyribonucleotide nucleotidyltransferase 1	-1.08	1.03	-1.04	1.55	-1.05	1.43	1.13	1.55	AW465370	t60? t120? t240? t480?		Pnpt1	polyribonucleotide nucleotidyltransferase 1	-1.01	1.09	1.22	-1.07	1.42	1.14	1.42	AW465370	t60?
1285	TP53I13	tumor protein p53 inducible protein 13	1.07	-1.04	-1.45	-1.05	-1.23	-1.14	1.17	-1.45	AW465372			TP53I13	tumor protein p53 inducible protein 13	1.27	1.39	1.08	1.19	-1.05	-1.15	1.51	1.51	AW465372			TP53I13	tumor protein p53 inducible protein 13	1.14	-1.18	-1.26	1.07	1.03	1.05	-1.26	AW465372
1286	Lepre1	leprecan 1	1.17	1.12	-1.15	-1.21	-1.02	-1.07	-1.06	-1.21	AW465380			Lepre1	leprecan 1	1.26	1.06	1.06	-1.28	-1.08	-1.07	-1.17	-1.28	AW465380			Lepre1	leprecan 1	-1.01	1.18	-1.04	1.22	1.25	1.02	1.25	AW465380
1287	DPM2	dolichyl-phosphate mannosyltransferase polypeptide 2, regulatory subunit	1.02	1.03	1.04	1	-1.05	-1.36	-1.01	-1.36	AW465383			DPM2	dolichyl-phosphate mannosyltransferase polypeptide 2, regulatory subunit	-1.22	1.2	-1.07	1.04	1.17	-1.19	1.56	1.56	AW465383			DPM2	dolichyl-phosphate mannosyltransferase polypeptide 2, regulatory subunit	1.26	-1.09	1.18	1.07	-1.06	-1.11	1.26	AW465383	t120? t480?
1288	TAF5L	TAF5-like RNA polymerase II, p300/CBP-associated factor (PCAF)-associated factor, 65kDa	-1.12	-1.02	1.11	-1.01	-1.09	-1.01	-1.1	-1.12	AW465385	t15? t240? t480? t720?		TAF5L	TAF5-like RNA polymerase II, p300/CBP-associated factor (PCAF)-associated factor, 65kDa	1.08	1.12	-1.01	-1.07	1.1	-1.09	-1.01	1.12	AW465385	t15? t60? t120? t240? t480?		TAF5L	TAF5-like RNA polymerase II, p300/CBP-associated factor (PCAF)-associated factor, 65kDa	-1.07	-1.07	1.26	1.16	-1.08	-1.02	1.26	AW465385	t15? t30? t60? t120? t480?
1289	LOC613533		-1.09	-1.17	1.17	-1.02	-1.2	1.19	1.54	1.54	AW465391			LOC613533		1.11	-1.06	1.05	1.2	1.06	1.19	1.41	1.41	AW465391			LOC613533		-1.06	1	1.19	-1.06	-1.05	1.05	1.19	AW465391
1290	Ddx39	DEAD (Asp-Glu-Ala-Asp) box polypeptide 39	1.73	-1.12	-1.26	-1.06	1.29	1.17	-1.16	1.73	AW465394			Ddx39	DEAD (Asp-Glu-Ala-Asp) box polypeptide 39	2.04	1.28	-1	-1.08	1.11	-1.02	-1.28	2.04	AW465394			Ddx39	DEAD (Asp-Glu-Ala-Asp) box polypeptide 39	1	-1.22	-1.01	1.35	1.34	1.14	1.35	AW465394
1291	HES1	hairy and enhancer of split 1, (Drosophila)	-1.08	-1.13	1.14	-1.17	-1.29	-1.09	1	-1.29	AW465398			HES1	hairy and enhancer of split 1, (Drosophila)	-1.09	1.12	1.02	-1.29	-1.03	-1.14	-1.12	-1.29	AW465398	t60? t120? t240?		HES1	hairy and enhancer of split 1, (Drosophila)	1.13	-1.17	1.21	1.29	-1.16	1.07	1.29	AW465398	t60? t120? t240? t480?
1292	Ahsa1	AHA1, activator of heat shock protein ATPase homolog 1 (yeast)	1.04	1.03	-1	1.23	-1.05	-1.12	-1.01	1.23	AW465399			Ahsa1	AHA1, activator of heat shock protein ATPase homolog 1 (yeast)	1.33	-1.12	1.33	1.37	-1.07	-1.03	1.26	1.37	AW465399			Ahsa1	AHA1, activator of heat shock protein ATPase homolog 1 (yeast)	-1.02	1.4	-1.06	1.06	1.25	-1.01	1.4	AW465399
1293	TMEM100	transmembrane protein 100	1.03	-1.12	-1.01	-1.3	-1	1.08	1.1	-1.3	AW465408			TMEM100	transmembrane protein 100	1.09	-1.02	-1.07	-1.06	1.08	1.13	-1.17	-1.17	AW465408	t60? t480? t720?		TMEM100	transmembrane protein 100	-1.05	-1.04	1.12	-1.02	-1.03	1.02	1.12	AW465408
1294	PDCD6	programmed cell death 6	-1.1	-1	-1.23	-1.02	1.05	-1.01	1.01	-1.23	AW465410			PDCD6	programmed cell death 6	1.17	1.08	1.11	-1.09	-1.01	-1.1	1.09	1.17	AW465410			PDCD6	programmed cell death 6	-1.08	1.05	-1.12	1.25	1.26	1.07	1.26	AW465410
1295	Gosr1	golgi SNAP receptor complex member 1	-1.32	1.01	1.1	1.02	-1	-1.22	-1.11	-1.32	AW465415	t720?		Gosr1	golgi SNAP receptor complex member 1	-1.07	1.29	1.1	-1.19	1.12	-1.16	-1.13	1.29	AW465415	t15? t30? t60? t120? t240? t480? t720?		Gosr1	golgi SNAP receptor complex member 1	-1.08	-1.12	1.04	1.3	-1.03	-1.02	1.3	AW465415	t15? t30? t60? t120? t240? t480?
1296	LOC520101		-1.14	-1.06	-1.04	1.12	-1.06	-1.01	-1.02	-1.14	AW465416	t720?		LOC520101		1.02	1.07	1	1.35	1.01	1	1.14	1.35	AW465416	t15? t30? t60? t120? t240? t480?		LOC520101		-1.05	1.01	-1.02	-1.11	-1.02	1.09	-1.11	AW465416	t15? t30? t60? t120? t240? t480?
1297	THOC6		1.19	-1.22	1.08	1.06	-1.12	1.2	1.13	-1.22	AW465419			THOC6		-1.01	1.04	-1.06	1.19	1.09	1.14	1.16	1.19	AW465419			THOC6		1.14	-1.07	1.26	1.05	-1.09	1.08	1.26	AW465419
1298	ALDOA	aldolase A, fructose-bisphosphate	-1.09	1.13	1.08	-1.15	-1.09	-1.23	1.11	-1.23	AW465422			ALDOA	aldolase A, fructose-bisphosphate	1.07	1.61	1.32	-1.42	1.01	-1.22	1.04	1.61	AW465422			ALDOA	aldolase A, fructose-bisphosphate	1.03	-1.2	-1.04	1.48	1.11	-1.05	1.48	AW465422
1299	Naglu	alpha-N-acetylglucosaminidase (Sanfilippo disease IIIB)	1.08	1.22	1.03	-1.3	-1.03	-1.21	-1.06	-1.3	AW465426			Naglu	alpha-N-acetylglucosaminidase (Sanfilippo disease IIIB)	1.11	1.15	-1.01	-1.3	-1.05	-1.21	-1.25	-1.3	AW465426			Naglu	alpha-N-acetylglucosaminidase (Sanfilippo disease IIIB)	1.17	1.13	1.1	1.12	1.25	1.04	1.25	AW465426	t120?
1300	Ythdf2	YTH domain family 2	-1.05	1.09	-1.2	1.13	1.24	1.14	-1.21	1.24	AW465429			Ythdf2	YTH domain family 2	1.28	1.13	1.18	1.16	1.08	1.1	1.12	1.28	AW465429			Ythdf2	YTH domain family 2	1.06	1.11	-1.05	1.24	1.41	1	1.41	AW465429
1301	PLD3	phospholipase D family, member 3	1.24	-1.03	1.63	1.49	-1.07	-1.23	1.1	1.63	AW465432			PLD3	phospholipase D family, member 3	1.33	-1.21	1.71	1.24	-1.05	-1.26	1.87	1.87	AW465432			PLD3	phospholipase D family, member 3	1.06	1.44	1.17	1.51	1.19	1.07	1.51	AW465432
1302	Sertad4		-1.06	-1.15	1.14	-1.02	-1.02	-1.17	1.03	-1.17	AW465433			Sertad4		-1.03	-1.14	1.14	1.04	1.02	-1.03	1.2	1.2	AW465433	t15? t30? t60? t120? t240? t480?		Sertad4		1.07	1.09	1.08	1.02	1.08	-1.06	1.09	AW465433	t15? t30? t60? t120? t240? t480?
1303	MGC151989		1.05	-1.05	-1.45	-1.19	1.11	-1.07	-1.61	-1.61	AW465435			MGC151989		1.13	1.14	-1.05	-1.26	1.11	-1.12	-1.32	-1.32	AW465435			MGC151989		1.04	-1.07	-1.18	1.2	1.1	1.05	1.2	AW465435	t60? t480?
1304	MGC143402		1.1	-1.01	1.19	1	-1.07	-1.01	1.01	1.19	AW465442	t720?		MGC143402		-1.01	1.08	-1.06	1.04	1.03	1.02	1.14	1.14	AW465442	t15? t60? t120? t240? t480?		MGC143402		1.19	-1.02	1.2	-1.01	-1.01	1.03	1.2	AW465442	t30? t60? t120? t240? t480?
1305	Mrps12	mitochondrial ribosomal protein S12	1.11	-1.12	1.22	1.34	1.17	1.28	-1.2	1.34	AW465445			Mrps12	mitochondrial ribosomal protein S12	1.2	-1.04	1.18	1.69	1.12	1.54	1.26	1.69	AW465445			Mrps12	mitochondrial ribosomal protein S12	1.2	1.1	1.23	1.03	1.23	-1.12	1.23	AW465445
1306	Vps29	vacuolar protein sorting 29 (S. pombe)	-1.02	1.08	-1.45	-1.12	1.11	1.09	-1.27	-1.45	AW465446			Vps29	vacuolar protein sorting 29 (S. pombe)	1.3	1.22	-1.05	1.13	1.19	1.11	1	1.3	AW465446			Vps29	vacuolar protein sorting 29 (S. pombe)	-1.04	1.03	1.02	1.15	1.12	-1.03	1.15	AW465446
1307	CDK4	cyclin-dependent kinase 4	1.03	-1.06	1.85	1.15	-1.14	1.08	-1.07	1.85	AW465448			CDK4	cyclin-dependent kinase 4	-1.02	1.05	1.41	1.26	1.17	1.22	1.12	1.41	AW465448			CDK4	cyclin-dependent kinase 4	1.23	1.06	1.46	1.16	-1.17	-1.15	1.46	AW465448
1308	FAM48A		-1.13	-1	1.03	1.02	-1.05	-1.13	1.03	-1.13	AW465452			FAM48A		-1.12	1.01	1.06	1.01	1.01	-1.05	1.18	1.18	AW465452	t15? t60? t120? t240? t480?		FAM48A		1.06	1.08	1.06	1.09	1.04	-1.06	1.09	AW465452	t15? t30? t60? t120? t480?
1309	Ndufb10	NADH dehydrogenase (ubiquinone) 1 beta subcomplex, 10	1.08	-1.04	1.09	1.1	1.06	-1.19	1.1	-1.19	AW465453			Ndufb10	NADH dehydrogenase (ubiquinone) 1 beta subcomplex, 10	1.12	1.2	-1.06	-1.28	-1.01	-1.09	1.51	1.51	AW465453	t120?		Ndufb10	NADH dehydrogenase (ubiquinone) 1 beta subcomplex, 10	1.07	-1.13	1.38	1.67	1.32	-1.15	1.67	AW465453
1310	SFN	stratifin	1.43	-1.3	1.63	1	1.03	-1.31	-1.11	1.63	AW465454			SFN	stratifin	1.5	1.04	1.57	1.17	1.07	-1.03	1.53	1.57	AW465454			SFN	stratifin	1.38	-1.1	1.3	1.14	1.17	-1.24	1.38	AW465454
1311	C17orf61		1.38	-1.18	2.09	1.36	-1.4	-1.06	-1.26	2.09	AW465457	t15? t60?		C17orf61		-1.04	1.05	1.47	1.06	-1.02	-1.11	1.22	1.47	AW465457			C17orf61		1.5	-1.05	1.68	1.53	-1.14	1.06	1.68	AW465457
1312	FAM55C		1.17	-1.03	1.28	-1	-1.07	1.07	-1.04	1.28	AW465465	t240?		FAM55C		-1.04	1.02	-1.02	-1.01	1.11	1.04	1.05	1.11	AW465465	t15? t60? t120? t240? t480?		FAM55C		1.23	-1.02	1.33	1.09	-1.11	1.04	1.33	AW465465	t30? t60? t120? t240? t480?
1313	Gng5	guanine nucleotide binding protein (G protein), gamma 5	-1.33	-1.15	-1.15	1.05	1.83	1.84	2.07	2.07	AW465466			Gng5	guanine nucleotide binding protein (G protein), gamma 5	1.04	1.22	1	1.13	1.49	1.6	1.39	1.6	AW465466			Gng5	guanine nucleotide binding protein (G protein), gamma 5	-1.16	-1.17	1.08	1.25	1.41	1.11	1.41	AW465466
1314	PTPRF	protein tyrosine phosphatase, receptor type, F	-1.07	-1.2	-1.05	-1.39	1.31	-1.07	-1.76	-1.76	AW465468			PTPRF	protein tyrosine phosphatase, receptor type, F	1.13	-1.19	1.04	1.03	1.38	1.11	-1.38	1.38	AW465468			PTPRF	protein tyrosine phosphatase, receptor type, F	-1.03	1.22	1.19	-1.04	1.14	-1.12	1.22	AW465468
1315	psmb5	proteasome (prosome, macropain) subunit, beta type 5	-1.03	1.11	-1.21	-1.01	1.08	-1.11	1.02	-1.21	AW465471			psmb5	proteasome (prosome, macropain) subunit, beta type 5	1.14	-1.09	1.19	1.04	1.09	-1.09	1.24	1.24	AW465471			psmb5	proteasome (prosome, macropain) subunit, beta type 5	1.08	1.47	-1.07	1.22	1.24	1.01	1.47	AW465471
1316	Insig2	insulin induced gene 2	1.01	-1.21	1.21	-1.12	-1.05	1.02	1.27	1.27	AW465475			Insig2	insulin induced gene 2	1.09	-1.12	1.22	1.17	1.01	1.02	-1.04	1.22	AW465475	t720?		Insig2	insulin induced gene 2	1.05	1.04	1.1	-1.11	1.11	1.06	1.11	AW465475
1317	HSPB1	heat shock 27kDa protein 1	-1.03	1.07	1.13	-1.3	-1.14	-1.34	1.02	-1.34	AW465477	t15? t30?		HSPB1	heat shock 27kDa protein 1	1	1.34	1.3	-1.67	-1.43	-1.23	-1.07	-1.67	AW465477			HSPB1	heat shock 27kDa protein 1	1.08	-1.08	1.1	1.58	1.56	-1.09	1.58	AW465477
1318	Farsa	phenylalanyl-tRNA synthetase, alpha subunit (EC:6.1.1.20)	-1.06	1.11	-1.29	-1.63	1.23	1.14	1.02	-1.63	AW465478			Farsa	phenylalanyl-tRNA synthetase, alpha subunit (EC:6.1.1.20)	1.13	1.34	1.09	-1.64	-1.05	1.09	-1.18	-1.64	AW465478	t240? t480?		Farsa	phenylalanyl-tRNA synthetase, alpha subunit (EC:6.1.1.20)	1.08	-1.17	-1.09	1.24	1.41	1.05	1.41	AW465478
1319	MGC127568		-1.01	-1.19	1.03	1.07	-1.07	1.08	1.03	-1.19	AW465481			MGC127568		1.16	-1.08	-1	1.34	-1.01	1.12	1.16	1.34	AW465481	t15? t60? t120? t480?		MGC127568		-1.03	-1	1.06	-1.11	1.09	1.03	-1.11	AW465481	t15? t30? t60? t120? t480?
1320	Coq5	coenzyme Q5 homolog, methyltransferase (S. cerevisiae) (EC:2.1.1.-)	-1.19	-1.09	-1.22	-1.03	-1.04	1.08	-1.18	-1.22	AW465485			Coq5	coenzyme Q5 homolog, methyltransferase (S. cerevisiae) (EC:2.1.1.-)	1.03	-1.01	-1.03	1.38	1.01	1.16	-1.12	1.38	AW465485	t480?		Coq5	coenzyme Q5 homolog, methyltransferase (S. cerevisiae) (EC:2.1.1.-)	-1.13	1.04	1.04	-1.2	1.04	-1.03	-1.2	AW465485	t480?
1321	Olfml2a		-1.05	-1.09	1.13	-1.02	-1.04	1.01	1.07	1.13	AW465490	t720?		Olfml2a		1.03	-1.02	1.08	1.07	-1.04	1.1	1.11	1.11	AW465490	t15? t30? t60? t120? t240? t480?		Olfml2a		1.04	1.02	1.08	-1.02	1.12	-1.01	1.12	AW465490	t30? t60? t120? t240? t480?
1322	Robo4	roundabout homolog 4 (Drosophila)	-1.13	1.01	-1.81	-1.45	1.32	-1.03	-1.12	-1.81	AW465501	t15? t30? t60? t120? t240? t480?		Robo4	roundabout homolog 4 (Drosophila)	1.12	1.28	-1.08	-1.39	1.13	-1.14	-1.35	-1.39	AW465501	t60? t240? t480? t720?		Robo4	roundabout homolog 4 (Drosophila)	1.09	-1.28	-1.51	1.1	1.28	1.08	-1.51	AW465501	t15? t30? t120? t240? t480?
1323	Bt.32534		1.15	-1.07	1.37	1.23	1.05	1.35	1.73	1.73	AW465505			Bt.32534		1.1	1	-1.05	-1.15	1.2	1.36	1.57	1.57	AW465505			Bt.32534		1.03	1.08	1.66	1.65	-1.03	-1.02	1.66	AW465505
1324	LOC497190		1	1.01	1.16	-1.06	-1.21	-1.02	1.1	-1.21	AW465507	t240? t720?		LOC497190		-1.12	1.01	-1.12	-1.16	-1.06	-1.01	1.1	-1.16	AW465507	t15? t240? t480?		LOC497190		1.24	1.05	1.26	1.16	-1.06	1.01	1.26	AW465507	t30? t60? t120? t240? t480?
1325	Pfdn2	prefoldin 2	-1.14	-1.21	1.9	-1.01	-1.19	-1.1	1.04	1.9	AW465508			Pfdn2	prefoldin 2	-1.23	-1.06	1.3	-1.04	1.08	1.04	1.11	1.3	AW465508	t60? t120?		Pfdn2	prefoldin 2	1.34	-1.07	1.58	1.16	-1.16	-1.17	1.58	AW465508	t60? t120? t480?
1326	STC1	stanniocalcin 1	1.3	1.22	1.02	1.15	1.27	1.67	1.89	1.89	AW465510			STC1	stanniocalcin 1	1.65	1.02	1.21	1.35	1.1	1.31	-1.01	1.65	AW465510	t15?		STC1	stanniocalcin 1	-1.09	1.26	-1.03	1.05	1.22	1.33	1.33	AW465510	t60? t480?
1327	C1orf133		-1.08	1.08	1.08	-1.12	1.04	1.04	1.05	-1.12	AW465521	t720?		C1orf133		-1	1.04	1.05	-1.05	-1.01	1.1	1.05	1.1	AW465521	t15? t30? t60? t120? t240? t480?		C1orf133		1.09	1.17	1.04	-1.02	1.14	-1.01	1.17	AW465521	t15? t30? t60? t120? t240? t480?
1328	C18orf30		1.35	-1.13	1.59	1	1.11	-1.02	-1.15	1.59	AW465522	t720?		C18orf30		1.21	-1.03	1.04	1.17	-1.03	1.21	1.3	1.3	AW465522	t60? t240?		C18orf30		1.24	-1	1.49	1	1.26	-1.13	1.49	AW465522	t480?
1329	MAP3K3	mitogen-activated protein kinase kinase kinase 3	1.22	-1.06	1.11	1.05	-1.09	-1.06	1.16	1.22	AW465526	t720?		MAP3K3	mitogen-activated protein kinase kinase kinase 3	1.2	-1.05	1.27	1.17	-1.04	1.03	1.29	1.29	AW465526			MAP3K3	mitogen-activated protein kinase kinase kinase 3	1.13	1.08	1.01	1.04	1.11	-1.08	1.13	AW465526
1330	MAN2A1	mannosidase, alpha, class 2A, member 1	-1.17	1.2	-1.31	-1.31	1.08	1.09	1.03	-1.31	AW465535	t720?		MAN2A1	mannosidase, alpha, class 2A, member 1	1.06	1.36	1	-1.29	-1.01	-1.01	-1.23	1.36	AW465535	t120? t240? t480? t720?		MAN2A1	mannosidase, alpha, class 2A, member 1	1.01	-1.09	-1.1	1.18	1.16	1.13	1.18	AW465535	t60? t120? t480?
1331	LOC534323		-1.03	-1.12	1.06	-1.09	-1.21	-1.02	-1	-1.21	AW465539			LOC534323		-1.21	1.06	-1.14	1.04	1.01	1.07	1.33	1.33	AW465539	t15?		LOC534323		1.23	-1.06	1.23	-1.04	-1.1	-1.07	1.23	AW465539	t120?
1332	LOC616166		-1.16	-1.07	-1.13	-1.1	1.11	1.11	-1.01	-1.16	AW465545	t720?		LOC616166		-1.02	-1.03	-1.06	1.06	1.07	1.06	1.02	1.07	AW465545	t15? t30? t60? t120? t240? t480?		LOC616166		-1.08	1.09	-1.05	-1.11	1.06	1.11	1.11	AW465545	t15? t30? t60? t120? t240? t480?
1333	Alox12	arachidonate 12-lipoxygenase	1.03	-1.11	1.15	-1.18	1.03	1.02	1.24	1.24	AW465549			Alox12	arachidonate 12-lipoxygenase	1.02	-1.1	-1.02	1.04	-1	1.14	1.36	1.36	AW465549	t60? t240? t480?		Alox12	arachidonate 12-lipoxygenase	1.15	1.06	1.15	-1.07	1.13	-1.03	1.15	AW465549	t60? t120? t480?
1334	PAG17		1.27	1.05	1.01	1.03	-1.03	1.06	-1.16	1.27	AW465550	t15? t30? t240? t480?		PAG17		1.24	1.05	1.18	1.14	-1.22	-1.03	1.01	1.24	AW465550	t15? t30? t240? t480?		PAG17		1.16	1.01	-1.07	1.1	1.37	-1	1.37	AW465550	t15? t60? t120? t240? t480?
1335	AW465553		-1.08	1.02	-1.08	-1.12	1.04	1	-1.03	-1.12	AW465553	t480? t720?		AW465553	Transcribed locus	1.17	1.09	1.01	-1.05	1.04	-1.02	1.03	1.17	AW465553	t15? t30? t60? t120? t240? t480? t720?		AW465553		-1.1	1.02	1.03	1.06	1.07	1.09	-1.1	AW465553	t30? t60? t120? t240? t480?
1336	Cngb3	cyclic nucleotide gated channel beta 3	1.1	-1.01	1.08	-1.01	1.01	1.08	1.06	1.1	AW465556	t720?		Cngb3	cyclic nucleotide gated channel beta 3	-1.03	1.12	-1.08	-1.05	1.1	1.08	1.08	1.12	AW465556	t15? t60? t240? t480?		Cngb3	cyclic nucleotide gated channel beta 3	1.13	-1.07	1.14	1.12	-1.01	1.06	1.14	AW465556	t60? t120? t480?
1337	C15orf39	chromosome 15 open reading frame 39	-1.12	-1.28	1.41	1.03	1.03	-1.2	1.43	1.43	AW465557			C15orf39	chromosome 15 open reading frame 39	-1.06	-1.29	1.28	1.12	-1.18	-1.01	1.15	-1.29	AW465557	t60? t720?		C15orf39	chromosome 15 open reading frame 39	1.15	1.2	1.25	1.08	1.49	-1.12	1.49	AW465557	t15? t60?
1338	PRL	prolactin	-1.13	-1.14	-1.02	1.16	-1.02	1.05	1.02	1.16	AW465564	t720?		PRL	prolactin	1.09	-1.01	1.03	1.35	-1.03	1.15	1.08	1.35	AW465564	t15? t30? t60? t120? t240? t480? t720?		PRL	prolactin	-1.06	1.01	-1.03	-1.04	1.11	-1	1.11	AW465564	t30? t60? t120? t240? t480?
1339	SH3d19	SH3 domain protein D19	1.11	1.28	-1.4	-1.14	-1.34	-1.35	-1.59	-1.59	AW465570			SH3d19	SH3 domain protein D19	-1.05	1.17	1.16	1.17	-1.04	-1.15	1.16	1.17	AW465570			SH3d19	SH3 domain protein D19	1.33	1.24	-1.39	-1.05	-1.13	-1.07	-1.39	AW465570	t60? t120? t480?
1340	PGS1		1	1.08	-1.03	-1.04	1.02	1.19	1.27	1.27	AW465578	t240? t480? t720?		PGS1		1.32	1.13	1.02	1.11	1	1.14	1.29	1.32	AW465578	t15? t30? t60? t120? t240? t480? t720?		PGS1		-1.08	1.01	1.02	-1.03	1.1	1.11	1.11	AW465578	t15? t30? t60? t120? t240? t480?
1341	Ccndbp1	cyclin D-type binding-protein 1	-1.06	-1.12	-1.11	-1.31	1.22	1.11	1.05	-1.31	AW465583			Ccndbp1	cyclin D-type binding-protein 1	1.12	-1.03	1.1	-1.03	1.26	1.17	-1.21	1.26	AW465583			Ccndbp1	cyclin D-type binding-protein 1	-1.04	1.03	1	1.03	1.02	1	-1.04	AW465583
1342	Mcf2l		1	-1.03	1.16	1.04	-1	-1.14	-1	1.16	AW465587	t720?		Mcf2l		-1.1	-1.04	1.01	-1.05	1.17	-1.09	1.02	1.17	AW465587	t15? t30? t60? t120? t240? t480? t720?		Mcf2l		1.31	1.06	1.23	1.16	-1.01	-1.04	1.31	AW465587	t30? t60? t120? t240? t480?
1343	CDK2	cyclin-dependent kinase 2	1.15	-1.08	1.57	1.05	-1.13	1.01	-1.13	1.57	AW465591			CDK2	cyclin-dependent kinase 2	-1.01	-1.01	1.17	1.18	1.07	1.06	1.01	1.18	AW465591			CDK2	cyclin-dependent kinase 2	1.27	1.07	1.47	1.04	-1.07	-1.11	1.47	AW465591
1344	LOC617625		1.22	-1.18	1.13	-1.17	1.11	1.2	1.29	1.29	AW465603	t15?		LOC617625		1.27	-1.05	1.09	-1.02	1.23	1.23	1.21	1.27	AW465603			LOC617625		1	1.01	1.16	1.03	-1.03	1.04	1.16	AW465603
1345	JUND	jun D proto-oncogene	1.1	1.17	-1.03	1.31	2.07	1.55	1.2	2.07	AW465610			JUND	jun D proto-oncogene	1.43	1.19	1.36	1.59	1.95	1.1	1.28	1.95	AW465610			JUND	jun D proto-oncogene	1.07	1.15	-1.03	1.07	1.27	1.26	1.27	AW465610
1346	Hspa14	heat shock protein 14	1.16	-1	-1.24	-1.43	-1.04	-1.01	1.01	-1.43	AW465613	t15? t60? t120? t720?		Hspa14	heat shock protein 14	1.07	1.18	-1.01	1.09	-1.1	1.02	-1.04	1.18	AW465613	t15? t60? t120? t240? t480?		Hspa14	heat shock protein 14	1.12	-1.04	-1.13	-1.19	1.1	1.01	-1.19	AW465613	t60? t120? t480?
1347	ZNF654		-1.03	-1.03	1.04	-1.05	1.09	1.07	-1.03	1.09	AW465617	t240? t480? t720?		ZNF654		1.08	1.09	1.04	-1.1	1.21	1.01	1	1.21	AW465617	t15? t60? t120? t240? t480?		ZNF654		-1.02	-1.03	1.1	1.17	-1.05	1.11	1.17	AW465617	t15? t30? t60? t120? t240? t480?
1348	Maged1	melanoma antigen, family D, 1	1.16	1.01	-1.25	1.08	1.11	-1.06	-1.12	-1.25	AW465622			Maged1	melanoma antigen, family D, 1	1.23	1.03	1.32	1.06	1.02	-1	-1.03	1.32	AW465622			Maged1	melanoma antigen, family D, 1	1.07	1.13	-1.25	1.22	1.27	-1.07	1.27	AW465622
1349	Clip1		-1.09	1.03	-1.09	-1.12	-1.02	1.14	1.15	1.15	AW465633	t720?		Clip1		1.1	-1.04	1.03	1.04	1.12	1.06	1.15	1.15	AW465633	t60? t120? t240? t480?		Clip1		-1.02	1.13	1.04	1.01	-1.07	1.15	1.15	AW465633	t60? t120?
1350	KHDRBS1	KH domain containing, RNA binding, signal transduction associated 1	1.11	-1.5	1.55	1.18	-1.34	1.14	-1.09	1.55	AW465635			KHDRBS1	KH domain containing, RNA binding, signal transduction associated 1	1.1	-1.06	1.11	1.33	-1.01	1.33	1.19	1.33	AW465635	t60?		KHDRBS1	KH domain containing, RNA binding, signal transduction associated 1	-1.01	-1.2	1.46	1.03	-1.05	-1.04	1.46	AW465635
1351	LOC528252		1.01	1.3	-1.66	-1.21	1.06	-1.07	-1.37	-1.66	AW465639			LOC528252		1.45	1.29	1.01	1.12	-1.1	1.21	-1.67	-1.67	AW465639	t240? t720?		LOC528252		-1.2	1.09	-1.27	-1.08	1.32	-1.18	1.32	AW465639
1352	Gapvd1		1.18	-1.14	-1.04	-1.13	-1.12	1.02	1.02	1.18	AW465643			Gapvd1		1.1	1.14	1.07	-1	1.03	1.07	-1.09	1.14	AW465643			Gapvd1		1.1	-1.13	1.09	1.12	-1.01	-1.05	-1.13	AW465643
1353	ARSE	arylsulfatase E (chondrodysplasia punctata 1)	1.14	1.11	-1.42	-1.18	1.03	-1.12	-1.19	-1.42	AW465650			ARSE	arylsulfatase E (chondrodysplasia punctata 1)	1.27	1.17	-1.11	-1.15	-1.07	-1.16	-1.25	1.27	AW465650	t15? t480?		ARSE	arylsulfatase E (chondrodysplasia punctata 1)	1.01	-1.07	-1.24	1.06	1.32	1.04	1.32	AW465650	t120? t480?
1354	MGC148420		1.16	-1.17	1.02	1.09	1.12	-1	1.35	1.35	AW465659			MGC148420		-1.01	-1.29	1.01	1.46	-1.05	1.15	1.36	1.46	AW465659	t30? t720?		MGC148420		1.35	1.3	1.05	-1.08	1.42	-1.04	1.42	AW465659	t30?
1355	Ap1g2	adaptor protein complex AP-1, gamma 2 subunit	1.16	-1.02	1.44	1.4	1.17	-1.08	-1.15	1.44	AW465660			Ap1g2	adaptor protein complex AP-1, gamma 2 subunit	1.01	1.13	1.24	2.05	1.17	1.24	1.25	2.05	AW465660			Ap1g2	adaptor protein complex AP-1, gamma 2 subunit	1.38	1.07	1.35	-1.15	1.21	-1.14	1.38	AW465660
1356	SERTAD2	SERTA domain containing 2	1.02	-1	-1.34	1.04	-1.15	-1.17	-1.04	-1.34	AW465664			SERTAD2	SERTA domain containing 2	1.4	1.11	1.18	-1.02	1.01	-1.24	-1.2	1.4	AW465664	t15?		SERTAD2	SERTA domain containing 2	-1.05	1.05	-1.2	1.23	-1.01	1.03	1.23	AW465664
1357	Mbd4	methyl-CpG binding domain protein 4	1.02	1.14	-1.41	1.02	-1.16	-1.14	-1.78	-1.78	AW465669			Mbd4	methyl-CpG binding domain protein 4	1.13	1.45	1.08	1.22	-1.2	-1.04	-1.33	1.45	AW465669	t240?		Mbd4	methyl-CpG binding domain protein 4	-1.02	-1.22	-1.25	-1.02	1.16	-1.05	-1.25	AW465669	t30? t480?
1358	POLG	polymerase (DNA directed), gamma (EC:2.7.7.7)	1.02	1.11	1	-1.04	-1.05	-1.25	-1.11	-1.25	AW465670			POLG	polymerase (DNA directed), gamma (EC:2.7.7.7)	1.01	1.31	1.07	-1.07	-1.03	-1.29	1.01	1.31	AW465670			POLG	polymerase (DNA directed), gamma (EC:2.7.7.7)	1.05	-1.05	1.06	1.18	1.12	1.04	1.18	AW465670	t60? t120?
1359	DUSP1	dual specificity phosphatase 1	-1.05	1.31	1.19	1.46	1.61	2.45	5.29	5.29	AW465681			DUSP1	dual specificity phosphatase 1	1.33	1.26	1.29	1.54	1.32	1.52	2.16	2.16	AW465681			DUSP1	dual specificity phosphatase 1	-1	1.2	1.11	1.24	1.4	1.5	1.5	AW465681
1360	ZNF677	zinc finger protein 677	1.04	1.07	-1.31	1.01	-1.01	-1.04	-1.24	-1.31	AW465683			ZNF677	zinc finger protein 677	1.14	1	1.21	1.31	-1.07	1.03	1.08	1.31	AW465683			ZNF677	zinc finger protein 677	1.29	1.27	-1.18	1.02	1.29	-1.03	1.29	AW465683
1361	Atp6v1c1	ATPase, H+ transporting, lysosomal V1 subunit C1	-1.05	1.07	-1.45	-1.18	1.47	1.3	-1.33	1.47	AW465687			Atp6v1c1	ATPase, H+ transporting, lysosomal V1 subunit C1	1.41	1.48	1.11	-1.46	1.37	1.06	-1.45	1.48	AW465687			Atp6v1c1	ATPase, H+ transporting, lysosomal V1 subunit C1	-1.19	-1.2	-1.24	1.66	1.22	1.17	1.66	AW465687
1362	FLJ25770		1.18	-1.1	1.08	1.12	-1.05	1.15	1.18	1.18	AW465694	t720?		FLJ25770		1.23	-1.06	-1	1.08	-1.06	1.08	1.2	1.23	AW465694	t15? t30? t60? t120? t240? t480?		FLJ25770		-1.03	1.04	1.13	1.08	1.12	1.03	1.13	AW465694	t30? t60? t120? t480?
1363	LOC614321		1.13	-1.08	-1.32	1.03	1.13	1.1	-1.34	-1.34	AW465695			LOC614321		1.46	1.2	1.28	1.02	1.26	1.09	-1.05	1.46	AW465695			LOC614321		-1.02	-1.02	-1.23	1.33	1.12	1.07	1.33	AW465695
1364	Arf6	ADP-ribosylation factor 6	-1.13	1.47	-1.55	-1.02	1.03	-1.2	1.08	-1.55	AW465699			Arf6	ADP-ribosylation factor 6	1.15	1.66	1.03	-1.17	-1.16	-1.35	-1.15	1.66	AW465699			Arf6	ADP-ribosylation factor 6	-1.14	1.01	-1.14	1.49	1.53	1.01	1.53	AW465699
1365	Rcor1	REST corepressor 2	-1.06	1.17	-1.34	1.03	1.19	-1.29	1.01	-1.34	AW465701	t240? t720?		Rcor1	REST corepressor 2	1.13	1.15	-1.04	-1.14	1.08	-1.31	1.03	-1.31	AW465701	t15? t30? t60? t120? t240? t720?		Rcor1	REST corepressor 2	1.02	1.12	-1.14	1.31	1.28	-1.01	1.31	AW465701	t15? t60? t480?
1366	C10ORF28	chromosome 10 open reading frame 28	-1.01	-1.06	1.06	-1.04	-1	-1.11	-1.09	-1.11	AW465702	t15? t30? t60? t120? t240? t480? t720?		C10ORF28	chromosome 10 open reading frame 28	-1.01	1.1	-1.02	-1.08	1.01	-1.09	-1.05	1.1	AW465702	t15? t30? t60? t120? t240? t480? t720?		C10ORF28	chromosome 10 open reading frame 28	1.13	-1.09	-1.01	1.06	1.07	1.08	1.13	AW465702	t15? t30? t60? t120? t240? t480?
1367	Klhl22		1.08	-1.04	-1.11	-1.1	1.05	-1.03	-1.19	-1.19	AW465703			Klhl22		1.08	1.01	1.2	1.34	1	1.07	1.26	1.34	AW465703			Klhl22		1.29	1.18	-1.1	-1.1	1.27	-1.06	1.29	AW465703
1368	LOC505518		-1.42	2.39	-2.68	-1.39	-1.26	-1.3	-2.23	-2.68	AW465704	t15?		LOC505518		1.5	2.54	-1	-1.38	-1.6	-1.63	-2.22	2.54	AW465704			LOC505518		-3.37	1.16	-2.17	1.33	1.53	1.29	-3.37	AW465704	t15?
1369	Topors	topoisomerase I binding, arginine/serine-rich	-1.04	1.27	1.2	1.16	-1.12	-1.02	-1.05	1.27	AW465706	t120?		Topors	topoisomerase I binding, arginine/serine-rich	-1.05	1.22	1.06	1.06	-1.08	1.02	1.04	1.22	AW465706	t15? t60? t240? t480?		Topors	topoisomerase I binding, arginine/serine-rich	1.1	1.11	1.19	1.18	1.06	-1.02	1.19	AW465706	t15? t60? t120? t480?
1370	MGC140692		1.11	1.1	-1.25	-1.33	-1.07	-1.21	-1.24	-1.33	AW465707	t15? t240?		MGC140692		1.39	1.31	1.17	-1.44	1.05	-1.29	-1.32	-1.44	AW465707	t15?		MGC140692		1.01	-1.09	-1.19	1.25	1.04	1.04	1.25	AW465707	t480?
1371	PTPMT1	protein tyrosine phosphatase, mitochondrial 1 (EC:3.1.3.36)	-1.02	-1.14	1.07	1.12	-1.34	-1.31	1.08	-1.34	AW465715	t15? t30? t120?		PTPMT1	protein tyrosine phosphatase, mitochondrial 1 (EC:3.1.3.36)	-1.22	-1.1	-1.11	-1.03	1.21	-1.14	1.66	1.66	AW465715	t15? t720?		PTPMT1	protein tyrosine phosphatase, mitochondrial 1 (EC:3.1.3.36)	1.25	1.01	1.32	1.2	-1.36	-1.17	-1.36	AW465715	t30? t120? t240? t480?
1372	C1orf63	chromosome 1 open reading frame 63	1.14	1.07	1.02	1.33	-1.19	1.17	-1.04	1.33	AW465717			C1orf63	chromosome 1 open reading frame 63	1.34	-1.05	1.16	1.22	-1.33	1.2	1.11	1.34	AW465717	t480?		C1orf63	chromosome 1 open reading frame 63	-1.02	1.19	1.08	1.29	1.31	1.06	1.31	AW465717
1373	Ripk2	receptor (TNFRSF)-interacting serine-threonine kinase 2	1.03	1.12	-1.02	1.25	1.2	1.34	1.47	1.47	AW465726			Ripk2	receptor (TNFRSF)-interacting serine-threonine kinase 2	1.06	1.03	1.06	1.17	1.14	1.12	1.36	1.36	AW465726	t240?		Ripk2	receptor (TNFRSF)-interacting serine-threonine kinase 2	1.03	1.16	1.01	1.18	1.16	1.18	1.18	AW465726	t60? t120? t480?
1374	Tmem9	transmembrane protein 9	-1.04	-1.1	1.04	-1.03	1.14	1.06	1.17	1.17	AW465730	t720?		Tmem9	transmembrane protein 9	1.03	-1.12	1.02	-1.03	1.11	1.11	1.18	1.18	AW465730	t15? t30? t60? t120? t240? t480?		Tmem9	transmembrane protein 9	1.07	1.09	1.08	1.06	1.07	-1	1.09	AW465730	t30? t60? t120? t240? t480?
1375	SORD	sorbitol dehydrogenase	1.1	1.1	-1.27	-1.06	1.17	-1.09	-1.48	-1.48	AW465736			SORD	sorbitol dehydrogenase	1.41	1.38	1.09	-1.01	1.05	-1.1	-1.17	1.41	AW465736			SORD	sorbitol dehydrogenase	-1.12	-1.06	-1.08	1.28	1.34	1.06	1.34	AW465736
1376	AW465737		1.15	1.05	-1	1.03	-1.03	1.01	1.16	1.16	AW465737	t720?		AW465737		1.19	-1.03	1.15	1.12	-1.1	1.08	1.16	1.19	AW465737	t60? t120? t240? t480?		AW465737		1.04	1.15	-1.09	1.02	1.26	-1.01	1.26	AW465737	t60? t120? t480?
1377	Immp2l	IMP2 inner mitochondrial membrane peptidase-like (S. cerevisiae)	1.16	-1.03	1.12	1.06	1.27	-1.03	-1.05	1.27	AW465739			Immp2l	IMP2 inner mitochondrial membrane peptidase-like (S. cerevisiae)	1.26	1.03	1.16	1.19	1.16	1.03	1.43	1.43	AW465739			Immp2l	IMP2 inner mitochondrial membrane peptidase-like (S. cerevisiae)	-1.03	1.16	1.21	1.23	1.3	1.03	1.3	AW465739
1378	ING1	inhibitor of growth family, member 1	-1.14	-1.26	1.56	-1.06	-1.6	-1.19	1.35	-1.6	AW465757	t15? t30?		ING1	inhibitor of growth family, member 1	-1.72	1.14	1.14	-1.17	-1.06	-1.04	1.36	-1.72	AW465757			ING1	inhibitor of growth family, member 1	1.47	-1.22	1.48	1.28	-1.34	-1.08	1.48	AW465757
1379	Utp11l		-1.08	1.1	-1.26	1.09	1.19	-1.09	-1.13	-1.26	AW465760			Utp11l		1.11	1.18	1.02	-1.02	1.13	-1.08	1	1.18	AW465760			Utp11l		-1.01	1.07	-1.06	1.24	1.2	-1.01	1.24	AW465760	t480?
1380	LOC646891		1.05	-1.13	1.02	-1.01	-1.02	-1.33	-1.02	-1.33	AW465761	t15? t30? t60? t120? t240? t480? t720?		LOC646891		-1.03	-1.09	1.01	1.01	1.2	-1.18	1.1	1.2	AW465761	t15? t30? t60? t120? t240? t480? t720?		LOC646891		1.23	-1	1.08	1.05	-1.07	-1.08	1.23	AW465761	t30? t60? t120? t240? t480?
1381	Mark4	MAP/microtubule affinity-regulating kinase 4 (EC:2.7.11.1)	-1.04	-1.01	-1.05	1	-1.05	-1.13	1.24	1.24	AW465764	t240? t720?		Mark4	MAP/microtubule affinity-regulating kinase 4 (EC:2.7.11.1)	-1.03	1.07	-1.15	1.07	1.07	-1.07	1.51	1.51	AW465764	t15? t60? t240? t720?		Mark4	MAP/microtubule affinity-regulating kinase 4 (EC:2.7.11.1)	1.05	-1.1	1.03	-1.02	-1	1	-1.1	AW465764	t30? t60? t120? t480?
1382	Klf2	Kruppel-like factor 2 (lung)	-1.03	1.04	-1.14	-1.13	1.27	1.15	1.26	1.27	AW465766	t15? t240? t720?		Klf2	Kruppel-like factor 2 (lung)	1.06	1.1	-1.08	-1.06	1.32	1.04	1.01	1.32	AW465766	t15? t60? t120? t240? t480?		Klf2	Kruppel-like factor 2 (lung)	1.01	-1.02	1.09	1.08	1.02	1.16	1.16	AW465766	t60? t120? t240? t480?
1383	Spen		1.23	1.03	1.2	1.03	-1.13	-1.04	1.05	1.23	AW465770			Spen		1.11	1.1	1.18	1.01	1.06	-1.03	1.21	1.21	AW465770	t15?		Spen		1.11	1.03	1.11	1.13	-1.07	1	1.13	AW465770	t60? t120? t480?
1384	Bt.36042		-1.06	1.02	1.04	1.09	1.01	-1.02	-1.03	1.09	AW465771	t720?		Bt.36042		-1.02	1.05	1.06	1.23	-1.09	1.05	1.12	1.23	AW465771	t15? t30? t60? t120? t240? t480?		Bt.36042		1.06	1.08	1.02	-1.04	1.18	-1.01	1.18	AW465771	t15? t30? t60? t120? t240? t480?
1385	Znrf1	zinc and ring finger 1	-1.22	1.04	-1.13	1.01	1.05	-1.13	-1.3	-1.3	AW465775	t15? t30? t240?		Znrf1	zinc and ring finger 1	1.03	1.08	1.04	1.08	-1.05	-1.14	-1.32	-1.32	AW465775	t15? t30? t60? t240?		Znrf1	zinc and ring finger 1	1.12	1.11	1.01	1.12	1.26	1.06	1.26	AW465775	t30? t60?
1386	Serinc3		1.02	-1.05	1.02	1.08	-1.05	-1.07	-1.01	1.08	AW465776			Serinc3		1.01	-1.03	1.14	1.24	1.05	-1.1	1.2	1.24	AW465776			Serinc3		1.18	1.08	1.07	1.12	1.06	-1.03	1.18	AW465776
1387	Dclre1b	DNA cross-link repair 1B, PSO2 homolog (S. cerevisiae)	-1	-1.01	1.1	1.04	1.04	-1.25	-1.01	-1.25	AW465777	t240? t480? t720?		Dclre1b	DNA cross-link repair 1B, PSO2 homolog (S. cerevisiae)	-1.07	-1.04	1.05	-1.04	1.1	-1.12	1.06	-1.12	AW465777	t15? t30? t60? t120? t240? t480? t720?		Dclre1b	DNA cross-link repair 1B, PSO2 homolog (S. cerevisiae)	1.13	1.11	1.07	1.1	1.06	-1.03	1.13	AW465777	t30? t60? t120? t240? t480?
1388	FAU	Finkel-Biskis-Reilly murine sarcoma virus (FBR-MuSV) ubiquitously expressed	1.34	-1.02	1.14	1.11	-1.15	1.2	1.17	1.34	AW465784			FAU	Finkel-Biskis-Reilly murine sarcoma virus (FBR-MuSV) ubiquitously expressed	1.17	-1.03	-1.12	1.23	1.04	1.08	1.34	1.34	AW465784			FAU	Finkel-Biskis-Reilly murine sarcoma virus (FBR-MuSV) ubiquitously expressed	1.04	1.11	1.27	1.02	-1.04	1.17	1.27	AW465784	t120?
1389	TSPAN3		-1.12	1.03	-1.77	-1.08	1.09	-1.18	-1.56	-1.77	AW465786			TSPAN3		1.21	1.35	1.12	-1.11	1.4	-1.33	-1.44	-1.44	AW465786			TSPAN3		-1.23	-1.13	-1.4	1.36	-1.1	1.07	-1.4	AW465786
1390	TRIM65		-1.07	1.13	-1.88	-1.42	1.52	-1	-1.48	-1.88	AW465793			TRIM65		1.32	1.88	-1.05	-1.51	1.51	-1.19	-1.4	1.88	AW465793			TRIM65		-1.33	-1.35	-1.45	1.41	1.22	1.23	-1.45	AW465793
1391	Pfdn1	prefoldin subunit 1	-1.17	1.15	-1.15	1.01	1.15	1.08	-1.53	-1.53	AW465795			Pfdn1	prefoldin subunit 1	1.1	1.02	1.08	1.13	1.31	-1.04	-1.08	1.31	AW465795			Pfdn1	prefoldin subunit 1	-1.08	1.3	1.08	1.23	1.06	1.08	1.3	AW465795
1392	AK3L1	adenylate kinase 3	1.01	-1.05	1.02	-1.01	-1.04	1.02	1.18	1.18	AW465803	t15? t30? t60? t120? t240? t480? t720?		AK3L1	adenylate kinase 3	1.08	1.01	1.01	1.04	1.01	1.07	1.26	1.26	AW465803	t15? t30? t60? t120? t240? t480?		AK3L1	adenylate kinase 3	1.03	1.01	1	-1.03	1.08	-1	1.08	AW465803	t15? t30? t60? t120? t240? t480?
1393	CSNK1A1	casein kinase 1, alpha 1	1.38	1.09	-1.19	-1.08	1.17	1.49	1.4	1.49	AW465807			CSNK1A1	casein kinase 1, alpha 1	1.07	1.26	1.07	1.28	1.22	1.31	1.27	1.31	AW465807			CSNK1A1	casein kinase 1, alpha 1	1.5	-1.01	1.07	-1.02	1.11	1.06	1.5	AW465807
1394	LRRC51		1.05	1.07	1	-1.18	-1.05	-1.04	-1.03	-1.18	AW465808	t240? t720?		LRRC51		-1.04	1.2	-1.12	-1.08	1	-1.01	1.04	1.2	AW465808	t15? t30? t60? t120? t240? t480? t720?		LRRC51		1.2	-1.06	1.1	-1.02	1.04	1.02	1.2	AW465808	t30? t60? t120? t240? t480?
1395	Zfp36l2	zinc finger protein 36, C3H type-like 2	-1	1.59	-1.17	-1.55	1.28	1.22	1.29	1.59	AW465810			Zfp36l2	zinc finger protein 36, C3H type-like 2	1.08	2.11	1.19	-1.85	-1.11	1.12	-1.27	2.11	AW465810			Zfp36l2	zinc finger protein 36, C3H type-like 2	1.18	-1.13	-1.01	1.54	1.58	1.14	1.58	AW465810
1396	Smpd2	sphingomyelin phosphodiesterase 2, neutral	1.01	1.16	-1.07	1.06	-1.19	-1.08	1.04	-1.19	AW465813	t15? t30? t60? t120? t240?		Smpd2	sphingomyelin phosphodiesterase 2, neutral	1.09	1.18	-1.08	1.04	1.05	-1.05	1.24	1.24	AW465813	t120? t240? t480?		Smpd2	sphingomyelin phosphodiesterase 2, neutral	1.02	1.03	-1.03	1.03	-1.08	1.02	-1.08	AW465813	t30? t60? t120? t480?
1397	Sec11a		-1	1.14	-1.12	-1.01	-1.06	-1.03	-1.09	1.14	AW465833			Sec11a		1.2	1.15	1.16	-1.01	1.14	-1.1	-1.22	-1.22	AW465833			Sec11a		-1.01	1.13	-1.06	1.14	-1.05	1.02	1.14	AW465833
1398	Vamp3	vesicle-associated membrane protein 3	1	1.09	1.18	1.16	1.12	1.34	1.16	1.34	AW465836			Vamp3	vesicle-associated membrane protein 3	-1.15	1.09	1.04	1.38	1.28	1.23	1.33	1.38	AW465836	t120?		Vamp3	vesicle-associated membrane protein 3	1.25	1.16	1.36	1.04	-1.02	1.06	1.36	AW465836	t120?
1399	GNB1	guanine nucleotide binding protein (G protein), beta polypeptide 1	1.03	1.17	-1.3	1.1	-1.19	-1.01	1.01	-1.3	AW465839			GNB1	guanine nucleotide binding protein (G protein), beta polypeptide 1	1.15	1.24	1.19	1.24	1.17	1.01	1.17	1.24	AW465839			GNB1	guanine nucleotide binding protein (G protein), beta polypeptide 1	1.2	1.16	-1.22	1.15	-1.1	-1.07	-1.22	AW465839
1400	LOC539899		-1.53	1.33	-1.87	1.26	-1.01	1.4	1.29	-1.87	AW465842	t15? t30? t60? t120? t240?		LOC539899		-1.12	1.75	-1.53	1.4	1.39	-1.13	1.49	1.75	AW465842	t30? t60? t480?		LOC539899		-1.86	-1.48	-1.07	1.03	-1.29	1.83	-1.86	AW465842	t15? t30? t120? t480?
1401	C6orf55		1.03	1.27	-1.4	1.09	1.25	1.12	-1.11	-1.4	AW465843			C6orf55		1.26	1.25	-1.02	1.23	1.27	-1.02	-1.08	1.27	AW465843	t15?		C6orf55		-1.16	1.15	-1.05	1.17	1.08	1.09	1.17	AW465843
1402	Upf2	UPF2 regulator of nonsense transcripts homolog (yeast)	-1.06	1	1.1	-1.1	-1.24	1.03	-1.19	-1.24	AW465845	t15? t30? t60? t240? t720?		Upf2	UPF2 regulator of nonsense transcripts homolog (yeast)	-1.05	1.28	1.06	-1.15	-1.07	1.05	-1.01	1.28	AW465845	t15? t60? t120? t240? t480?		Upf2	UPF2 regulator of nonsense transcripts homolog (yeast)	1.09	-1.16	1.11	1.15	-1.07	1.01	-1.16	AW465845	t60? t120? t240? t480?
1403	CSNK1E	casein kinase 1, epsilon	1.08	-1.03	1.06	-1.22	1.2	1.12	1.06	-1.22	AW465847	t15? t60?		CSNK1E	casein kinase 1, epsilon	1.18	1.02	1.33	-1.44	1.01	1.03	-1.06	-1.44	AW465847	t60? t120?		CSNK1E	casein kinase 1, epsilon	1.02	1.07	-1.07	1.37	1.31	1.09	1.37	AW465847
1404	Pcbp4	poly(rC) binding protein 4	1.09	1	1.23	-1.32	-1.01	-1.31	-1.14	-1.32	AW465849	t15? t30? t60? t120? t240? t480? t720?		Pcbp4	poly(rC) binding protein 4	1.03	-1.06	1.37	-1.26	1.06	-1.19	-1.16	1.37	AW465849	t15? t30? t60? t120? t240? t720?		Pcbp4	poly(rC) binding protein 4	1.32	1.15	1.05	1.14	1.09	-1.06	1.32	AW465849	t15? t60? t240? t480?
1405	Fbxl17	F-box and leucine-rich repeat protein 17	-1.09	-1.11	-1.26	1.42	1.16	-1.39	-1.01	1.42	AW465852			Fbxl17	F-box and leucine-rich repeat protein 17	-1.13	-1.22	1.24	1.41	-1.16	-1.08	1.18	1.41	AW465852			Fbxl17	F-box and leucine-rich repeat protein 17	1.35	1.31	-1.17	1.29	1.67	-1.23	1.67	AW465852
1406	FLJ20699		1.11	1.01	1.01	-1.07	-1.37	1.14	-1.36	-1.37	AW465857			FLJ20699		-1	1.01	-1.04	1.16	-1	1.16	-1.15	1.16	AW465857	t30? t480?		FLJ20699		1.22	1.02	1.14	-1.1	-1.27	1.03	-1.27	AW465857	t60? t120? t480?
1407	Gmip		-1.02	1.04	-1.34	1.14	-1.22	-1.04	1.16	-1.34	AW465861	t15? t30? t120?		Gmip		-1.03	1.27	-1.03	1.31	1.32	-1.04	1.78	1.78	AW465861			Gmip		1.1	-1.01	-1.1	-1	-1.27	1.05	-1.27	AW465861
1408	Bt.65311		1.03	-1.06	1.12	1.21	1.38	1.71	1.94	1.94	AW465865			Bt.65311		1.14	-1.31	-1.01	1.61	1.51	1.36	1.44	1.61	AW465865			Bt.65311		1.1	1.27	1.35	-1.05	1.1	1.26	1.35	AW465865	t30?
1409	TNS	tensin 1	1.02	-1.08	1.05	1.01	-1.09	-1.29	1.14	-1.29	AW465869	t720?		TNS	tensin 1	-1.08	-1.08	-1.06	-1.08	1.25	-1.21	1.41	1.41	AW465869	t15? t60? t120?		TNS	tensin 1	1.14	-1.05	1.12	1.14	-1.14	-1.05	1.14	AW465869	t15? t30? t60? t120? t240? t480?
1410	GLUL	glutamate-ammonia ligase (glutamine synthetase)	-1.17	-1.51	1.67	1.69	-1.09	-1.18	-1.05	1.69	AW465870	t15? t30? t60?		GLUL	glutamate-ammonia ligase (glutamine synthetase)	1.03	-1.12	1.33	1.7	1.15	1.03	1.17	1.7	AW465870			GLUL	glutamate-ammonia ligase (glutamine synthetase)	1.03	-1.12	1.49	1.25	-1.05	-1.14	1.49	AW465870
1411	Arih1	ariadne ubiquitin-conjugating enzyme E2 binding protein homolog 1 (Drosophila)	-1.17	1.26	-1.41	1.02	1.11	-1.25	-1.07	-1.41	AW465874	t15? t30? t60? t120? t240? t480?		Arih1	ariadne ubiquitin-conjugating enzyme E2 binding protein homolog 1 (Drosophila)	1.04	1.37	-1.07	-1.07	1.02	-1.27	-1.08	1.37	AW465874	t15? t240? t480? t720?		Arih1	ariadne ubiquitin-conjugating enzyme E2 binding protein homolog 1 (Drosophila)	-1.05	1.07	-1.19	1.26	1.25	-1.01	1.26	AW465874	t15? t60? t480?
1412	KIAA1545		1.09	-1.11	1.11	-1.19	1.1	1.02	1.04	-1.19	AW465879	t240?		KIAA1545		1.04	1.06	1.03	-1.11	1.29	-1.01	1.04	1.29	AW465879	t60? t120? t240? t480?		KIAA1545		1.15	-1.11	1.13	1.04	-1.11	1.07	1.15	AW465879	t30? t60? t120? t240? t480?
1413	CLTA	clathrin, light chain (Lca)	-1.32	-1.07	1.14	1.19	1.03	1.17	1.15	-1.32	AW465880			CLTA	clathrin, light chain (Lca)	-1.04	-1.05	1.09	1.65	1.06	1.16	-1.15	1.65	AW465880			CLTA	clathrin, light chain (Lca)	-1.01	1.17	1.37	-1.06	1.18	-1.02	1.37	AW465880
1414	NFKB1	nuclear factor of kappa light polypeptide gene enhancer in B-cells 1 (p105)	1.07	-1.21	1.57	1.15	-1.3	1.21	1.52	1.57	AW465881			NFKB1	nuclear factor of kappa light polypeptide gene enhancer in B-cells 1 (p105)	1.12	1.16	1.18	1.23	1.08	1.25	1.67	1.67	AW465881	t720?		NFKB1	nuclear factor of kappa light polypeptide gene enhancer in B-cells 1 (p105)	1.02	-1.21	1.35	1.08	-1.13	1.06	1.35	AW465881
1415	Wdr33	WD repeat domain 33	1.03	1.08	-1.06	1.23	-1.2	1.11	1.05	1.23	AW465883			Wdr33	WD repeat domain 33	1.28	1.08	1.27	1.33	-1.2	1.1	1.2	1.33	AW465883			Wdr33	WD repeat domain 33	1.08	1.1	-1.14	1.16	1.21	-1.02	1.21	AW465883
[truncated: 11,835 more rows]
