# Supplementary material for: Role of SPI-1 Secreted Effectors in Acute Bovine Response to Salmonella enterica Serovar Typhimurium: A Systems Biology Analysis Approach
Source: PLoS One. 2011 Nov 11;6(11):e26869. doi: 10.1371/journal.pone.0026869 (PMC3214023; doi:10.1371/journal.pone.0026869)
Supplement: Table S4 — Detailed gene list for Table 3 Summary of significant genes determined by Bayesian inference z -score using cutoff | z -score| ≥1.96 and |fold-change| ≥1.5 in response to infection with wild type Salmonella Typhimurium or an isogenic Δ sipA , sopABDE2 mutant. UI = Uninfected control loops inoculated with Luria-Bertani broth. WT = Wild type inoculated loop versus uninfected control loops. MUT = ΔsipA, sopABDE2 mutant inoculated loops versus uninfected control loops. (XLSX) [file pone.0026869.s004.xlsx]

## Sheet: Supporting Table S4
Table S4 Supporting Details for Table 2
	T-test p value<=0.05 and |fold|>=1.5 Method								T-test p value<=0.05 and |fold|>=1.5 Method
	Fold Change UI vs WT (time in minutes)								Fold Change UI vs MUT (time in minutes)
Gene Name	15	30	60	120	240	480	720		15	30	60	120	240	480	720		Gene Name	Alternate Gene Name	Accession number	Gene Description	Function
AAAS			-2.5														AAAS		CR550530	Achalasia, adrenocortical insufficiency, alacrimia (Allgrove, triple-A) (AAAS)	Regulation of nucleocytoplasmic transport
ABCA3									-2								ABCA3		DV893648	ATP-binding cassette, sub-family A \(ABC1), member 3	Stress response and cell death
ABCD3						-2.4											ABCD3		DR697715	ATP-binding cassette, sub-family D (ALD), member 3 (ABCD3)	Transport; peroxisome organization and biogenesis; peroxisomal long-chain fatty acid import
ABHD13							2.4										ABHD13		BF041780	Abhydrolase domain containing 13 (ABHD13)	Aromatic compound metabolism
ABHD8			4.8														ABHD8		CR453780	Abhydrolase domain containing 8 (ABHD8)	Aromatic compund metabolism
ACAA2			3.2														ACAA2		BM365867	Acetyl-Coenzyme A acyltransferase 2 (mitochondrial 3-oxoacyl-Coenzyme A thiolase) (ACAA2)	Lipid metabolism
ACADSB									-1.6								ACADSB		BT020635	Acyl-Coenzyme A dehydrogenase, short/branched chain	Metabolism and energy production
ACADVL	1.8																ACADVL		BF045910	Acyl-Coenzyme A dehydrogenase, very long chain (ACADVL)	Metabolism; energy production
ACE										1.9							ACE		CO871899	Angiotensin I converting enzyme
ACE2							-4.1										ACE2		CN440242	Angiotensin I converting enzyme (peptidyl-dipeptidase A) 2 (ACE2)	Proteolysis; entry of virus into host cell
ACOT7			2.2														ACOT7		CN437352	Acyl-CoA thioesterase 7 (ACOT7)	Lipid metabolism
ACP2			-2.5														ACP2		AW462034	Acid phosphatase 2, lysosomal (ACP2)	Hydrolysis of orthophosphoric monoesters to alcohol and phosphate
ACSL4							3.6										ACSL4		CR454195	Acyl-CoA synthetase long-chain family member 4 (ACSL4)	Lipid and fatty acid metabolism; learning and/or memory
ACTB									-1.6								ACTB		AY141970	Actin, beta	Cytoskeletal and Microtubule-based functions
ACTG1							2.3										ACTG1		CR553471	Actin, gamma 1 (ACTG1)	Structural constituent of cytoskeleton
ADCY4			3.8														ADCY4		CK773454	Adenylate cyclase 4 (ADCY4)	cAMP biosynthesis; intracellular signaling cascade
ADD1			3												2.3		ADD1		BM363681	Adducin 1 (alpha) (ADD1)	Cytoskeletal organization and biogenesis
ADFP							2.5										ADFP		CN433844	Adipose differentiation-related protein (ADFP)	Development; cell differentiation
ADM						4.7	3.2										ADM		CR456002	Adrenomedullin (ADM)	cAMP biosynthesis; progesterone biosynthesis; signal transduction; circulation; response to wounding
ADRA2A									-1.7								ADRA2A		NM_174499	Adrenergic, alpha-2A, receptor	Cell adhesion and migration
ADRBK2					2.1												ADRBK2		BM363657	Adrenergic, beta, receptor kinase 2 (ADRBK2)	Signal transduction
LOC532875															2.3		AFG3L1		CN432495	AFG3 \(ATPase family gene 3)-like 1	Proteolysis; protein catabolism
AGER		2.1															AGER		NM_173982	Advanced glycosylation end product-specific receptor (AGER)	Inflammatory response; cell surface receptor linked signal transduction
LPCAT4							2.4										AGPAT7		BF045562	1-acylglycerol-3-phosphate O-acyltransferase 7 (lysophosphatidic acid acyltransferase, eta) (AGPAT7)	Metabolism
AGRN			2.2														AGRN		BF044539	Agrin (AGRN)	Acetylcholine receptor signaling; synaptic transmission; clustering of voltage-gated sodium channels; synapse organization and b... <Preview truncated at 128 characters>
AHCYL2						-1.8	-2.3										AHCYL2	BC148036	BF041460	KIAA0828 protein	One-carbon compound metabolism
LOC510341			-3.1														AHNAK		BF440510	AHNAK nucleoprotein (desmoyokin) (AHNAK)	Nervous system development
AHSG									-2.4								AHSG		CK942580	Spectrin, beta, non-erythrocytic 1	Cytoskeletal and Microtubule-based functions
AK3L1									-1.9								AK3L1		CR550319	Adenylate kinase 3-like 1	Metabolism and energy production
AKAP8L			-3.5														AKAP8L		CN436648	A kinase (PRKA) anchor protein 8-like (AKAP8L)	Unknown
AKT1S1									-2								AKT1S1		CR851488	AKT1 substrate 1 \(proline-rich)	Stress response and cell death
AKT2			2.2														AKT2		CN437742	Thymoma viral proto-oncogene 2 (AKT2)	Regulation of JNK cascade
ALDH1A1						-2.3											ALDH1A1		NM_174239	Aldehyde dehydrogenase 1 family, member A1 (ALDH1A1)	Aldehyde metabolism
ALG9			2.3														ALG9		CR454217	Asparagine-linked glycosylation 9 homolog (S. cerevisiae, alpha- 1,2-mannosyltransferase) (ALG9)	Transfer of mannose to lipid-linked oligosaccharides
LOC506029			2.2														ALS2CR2		CV798744	Amyotrophic lateral sclerosis 2 (juvenile) chromosome region, candidate 2 (ALS2CR2)	Cell cycle arrest
ANAPC11			2.4														ANAPC11		AW261162	APC11 anaphase promoting complex subunit 11 homolog (ANAPC11)	Cell cycle; mitosis; protein ubiquitination
ANGPTL3			2.1						-1.7								ANGPTL3	EU599237	CR454696	ANGIOPOIETIN-LIKE 3; ANGPTL3
LOC539238			2.7														ANK2		CR455456	Ankyrin 2, neuronal (ANK2)	Signal transduction; metabolism
ANKRD1		-2.2					3.5										ANKRD1		BF046005	Ankyrin repeat domain 1 (cardiac muscle) (ANKRD1)	Defense response; signal transduction
KANK1							2										ANKRD15		BF043838	Ankyrin repeat domain 15 (ANKRD15)	Negative regulation of progression through cell cycle
UBTD1			2.3						-1.9								ANKRD2		CN439255	Ankyrin repeat domain 2 (stretch responsive muscle) (ANKRD2)	Muscle contraction; muscle development
ANKRD40			2														ANKRD40		CN437639	Ankyrin repeat domain 40 (ANKRD40)	Unknown
ANKRD54									-1.6								ANKRD54	BC116085	CK769671	Similar to CG10809-PA
ANTXR2						7.2	9.9										ANTXR2		CR456095	Anthrax toxin receptor 2 (ANTXR2)	Transmission of toxin signaling
ANXA1							5.1										ANXA1		AW464193	Annexin A1 (ANXA1)	Lipid metabolism; anti-apoptosis; cell motility; inflammatory response; cell surface receptor linked signal transduction
ANXA2			3.7				3.6								2		ANXA2		CR451651	Annexin A2 (ANXA2)	Skeletal development
ANXA8L1									-1.8								ANXA8		AW462672	Similar to Annexin A8 \(Annexin VIII) \(Vascular anticoagulant-beta) \(VAC-beta)	Cell growth, differentiation, and development
AP1G2									-1.6								AP1G2		CO880848	Adaptor-related protein complex 1, gamma 2 subunit	Protein biosynthesis, processing, and catabolism
APCDD1			-2.7														APCDD1	XM_585921	CN441328	APC, DOWNREGULATED BY, 1; APCDD1
APEX2			-2.2														APEX2		CR452654	APEX nuclease (apurinic/apyrimidinic endonuclease) 2 (APEX2)	DNA repair
APITD1					1.7												APITD1		BF043894	Apoptosis-inducing, TAF9-like domain 1 (APITD1)	Cell growth inhibition; inhibition of cAMP biosynthesis; putative apoptosis inducer
RPS21			1.7														APLP1		BM363828	Amyloid beta (A4) precursor-like protein 1 (APLP1)	Endocytosis; apoptosis; cell adhesion; nervous system development; organ morphogenesis
ANPEP			-4.2			-3	-3.1										APN		BF045684	Alanyl (membrane) aminopeptidase (aminopeptidase N, aminopeptidase M, microsomal aminopeptidase, CD13, p150) (APN)	Angiogenesis; proteolysis; cell differentiation
APOA1						-11.7	-22.8								-3.4		APOA1		CN435718	Apolipoprotein A-I (APOA1)	Lipid metabolism and transport; circulation; steroid and lipoprotein metabolism
APOA4						-4.5	-5.7										APOA4		CK846594	Apolipoprotein A-IV (APOA4)	Lipid metabolism and transport; circulation; lipoprotein metabolism
APOD			2.7														APOD		CR454541	Apolipoprotein D (APOD)	Lipid metabolism and transport
APOO			2.3														APOO	BC118339	CN434747	APOLIPOPROTEIN O; APOO
AR									-2.2								AR		DT887602	Androgen receptor \(dihydrotestosterone receptor; testicular feminization; spinal and bulbar muscular atrophy; Kennedy disease)	Cell growth, differentiation, and development
TCF20	1.9		2.2														AR1	TCF20	CR454460	Transcription factor 20 (AR1) (TCF20)	Transcription regulation
ARHGEF1									-1.6								ARHGEF1		AW462209	Rho guanine nucleotide exchange factor \(GEF) 1	Cell growth, differentiation, and development
ARL16									-2.4								ARL16		DT817078	ADP-ribosylation factor-like 16	Protein biosynthesis, processing, and catabolism
ARL6IP5			-2.1														ARL6IP5		DR697699	ADP-ribosylation-like factor 6 interacting protein 5 (ARL6IP5)	L-glutamate transport
ARNT2			4.8														ARNT2		CN436457	Aryl-hydrocarbon receptor nuclear translocator 2 (ARNT2)	Response to hypoxia; embryonic development; transcription regulation; signal transduction
ARRB1				-2.1													ARRB1		NM_174243	Arrestin, beta 1 (ARRB1)	Signal transduction; sensory perception
ASAH1					2.1												ASAH1		AW463906	N-acylsphingosine amidohydrolase (acid ceramidase) 1 (ASAH1)	Fatty acid, ceramide, and carboxylic acid metabolism
ASMTL									-1.6								ASMTL		BC102999	Acetylserotonin O-methyltransferase-like	Metabolism and energy production
ASRGL1				1.8													ASRGL1		BF041359	Asparaginase like 1 (ASRGL1)	Glycoprotein catabolism
ASXL1			1.9														ASXL1		BF042599	Additional sex combs like 1 (ASXL1)	Transcription regulation
ATAD3A									-2.9								ATAD3A	BC134487	BM363517	ATPase FAMILY, AAA DOMAIN-CONTAINING, MEMBER 3A
ATG12														1.6			ATG12	BC102225	DN519383	AUTOPHAGY 12, S. CEREVISIAE, HOMOLOG OF; ATG12
LOC522692					2.2												ATP13A3		CR552826	ATPase type 13A3 (ATP13A3)	Cation transport; metabolism
ATP1B1									-2.1								ATP1B1		CK830814	ATPase, Na+/K+ transporting, beta 1 polypeptide	Transport
ATP1B3			-2.5				-3.5										ATP1B3		CN437827	ATPase, Na+/K+ transporting, beta 3 polypeptide (ATP1B3)	Potassium and sodium ion transport
ATP5E							-2										ATP5E		CR550763	ATP synthase, H+ transporting, mitochondrial F1 complex, epsilon subunit (ATP5E)	Ion transport; ATP synthesis coupled proton transport
LOC782666			-2														ATP5L		DR697431	ATP synthase, H+ transporting, mitochondrial F0 complex, subunit G (ATP5L)	ATP synthesis-coupled proton transport; energy production
ATP6V1B2			1.9														ATP6V1B2		CN436205	ATPase, H+ transporting, lysosomal 56/58kDa, V1 subunit B2 (ATP6V1B2)	ATP synthesis-coupled proton transport; energy production
B3GNT8									-2								B3GNT8		BF041567	UDP-GlcNAc:betaGal beta-1,3-N-acetylglucosaminyltransferase 8	Protein biosynthesis, processing, and catabolism
B4GALT1					2.1	2.1	2										B4GALT1		BF043934	UDP-Gal:betaGlcNAc beta 1,4- galactosyltransferase, polypeptide 1 (B4GALT1)	Carbohydrate metabolism; oligosaccharide biosynthesis
BBS4							2.1										BBS4		CN435420	Bardet-Biedl syndrome 4 (BBS4)	Sensory perception; visual perception
BCAM			2.3														BCAM		CR455491	Basal cell adhesion molecule (Lutheran blood group) (BCAM)	Cell adhesion; signal transduction
BCAR3							2.1										BCAR3		CN435645	Breast cancer anti-estrogen resistance 3 (BCAR3)	Regulation of progression through cell cycle; small GTPase mediated signal transduction; response to drug
BCAS4							2.1										BCAS4		CR454014	Similar to breast carcinoma amplified sequence 4 isoform b (BCAS4)	Unknown
BCL2							2.1										BCL2		CN441800	B-cell CLL/lymphoma 2 (BCL2)	Regulation of progression through cell cycle; release of cytochrome c from mitochondria; anti-apoptosis; humoral immune response... <Preview truncated at 128 characters>
BCL2L13							2										BCL2L13		BF043962	BCL2-like 13 (apoptosis facilitator) (BCL2L13)	Induction of apoptosis; caspase activation
BCL7C			-2.3														BCL7C		CR451870	B-cell CLL/lymphoma 7C (BCL7C)	Unknown
MGC139150															-1.8		BCLAF1		CN438009	BCL2-associated transcription factor 1	Transcription regulation; induction of apoptosis; negative regulation of transcription
BHLHB2						4.8	5.7										BHLHB2		CR453860	Basic helix-loop-helix domain containing, class B, 2 (BHLHB2)	Transcription regulation
BIRC3			2.4	4.4	2.5	5.3	3.4										BIRC3		CB538194	Baculoviral IAP repeat-containing 3 (BIRC3)	Anti-apoptosis; cell surface receptor linked signal transduction
BLMH			2.1											1.7			BLMH		CN436981	Bleomycin hydrolase (BLMH)	Proteolysis
BRAP			2.7														BRAP	BC146079	BF440182	BRCA1-ASSOCIATED PROTEIN; BRAP
ST3GAL6			2.1														BRF1	XM_870485	BM365985	Generaltranscription factor
BRUNOL4																	BRUNOL4		CN439880	Transcribed locus, similar to bruno-like 4, RNA binding protein	Germ cell development; embryonic development; RNA interference
BTD			2														BTD		AV607074	Biotinidase (BTD)	Biotin metabolism; central nervous system and epidermis development
BTG2					2.8	3.3	5.2								2		BTG2		BF043020	BTG family, member 2 (BTG2)	DNA repair transcription regulation; negative regulation of cell proliferation
BUB1B							-2.5										BUB1B		CN436857	BUB1 budding uninhibited by benzimidazoles 1 homolog beta (BUB1B)	Protein amino acid phosphorylation; cell cycle; spindle organization and biogenesis; mitotic checkpoint; cell proliferation; pho... <Preview truncated at 128 characters>
USP18						1.9			-1.9								BUBP43		BF440165	Putative ubiquitin-specific protease (BUBP43)	Unknown
BUD31									-1.5								BUD31		CO886994	BUD31 homolog	Transcription regulation
BYSL	-2																BYSL		CN436425	Bystin (BYSL)	Cell adhesion; pregnancy
LOC535781							-2.2										C10orf118		CR550618	Chromosome 10 open reading frame 118 (C10orf118)	Unknown
C10ORF22							-2.1										C10orf22		CN440912	Chromosome 10 open reading frame 22 (C10orf22)	Unknown
LOC536656			-1.7			-1.8											C10orf42		BF042011	Chromosome 10 open reading frame 42 (C10orf42)	Unknown
C10ORF57			2.5														C10orf57		AW267098	chromosome 10 open reading frame 57 (C10orf57)	Unknown
C17H12ORF52			2.5														C12orf52		BF040693	Chromosome 12 open reading frame 52 (C12orf52)	Unknown
C14orf104									-2.3								C14orf104		BM365121	Chromosome 14 open reading frame 104	Unknown functions
COX16			2.3														C14orf112		CN437673	Chromosome 14 open reading frame 112 (C14orf112)	Unknown
C14orf120									-2.3								C14orf120		DV797485	Chromosome 14 open reading frame 120	Unknown functions
C14ORF153			2														C14orf153		BF039356	Chromosome 14 open reading frame 153 (C14orf153)	Unknown
C18H19ORF61							3.2										C18H19orf61	BC110277	BF042008	Hypothetical protein FLJ12886	Unknown
C7H19ORF22							2										C19orf22		BF039063	Chromosome 19 open reading frame 22 (C19orf22)	Unknown
C7H19ORF43			2														C19orf43		AW466179	Chromosome 19 open reading frame 43 (C19orf43)	Unknown
C1B1									-1.7								C1B1		DT840462	Calcium and integrin binding 1 \(calmyrin)	Cell adhesion and migration
C1GALT1																	C1GAL1		CB448815	Core 1 synthase, glycoprotein-N-acetylgalactosamine 3-beta-galactosyltransferase, 1 (C1GAL1)	Galactosylation of IgA1 molecules
C1GALT1			2.2	2.1	2.1	2.7											C1GALT1		CB448815	Core 1 synthase, glycoprotein-N-acetylgalactosamine 3-beta-galactosyltransferase, 1 (C1GALT1)	Galactosylation of IgA1 molecules
FAM129A							2.6										C1orf14		CN441786	Chromosome 1 open reading frame 24 (C1orf14)	Unknown
TSEN15			2.2														C1orf19		CR454498	Chromosome 1 open reading frame 19 (C1orf19)	mRNA processing
C1QTNF5							1.9										C1QTNF5		BF046067	C1q and tumor necrosis factor related protein 5 (C1QTNF5)	Phosphate transport
C1S			-2.2														C1S		BF044250	complement component 1, s subcomponent (C1S)	Proteolysis; complement activationG-protein coupled receptor protein signaling pathway; innate immune response
ROMO1					1.7												C20orf52		CR452110	Chromosome 20 open reading frame 52 (C20orf52)	Unknown
FAM110A							2.2										C20orf55		CR456239	Chromosome 20 open reading frame 55 (C20orf55)	Unknown
C21H15ORF26																	C21H15ORF26	BC109656	BF039326	cDNA	Unknown
LOC781454			2														C2orf30		BF044941	Chromosome 2 open reading frame 30 (C2orf30)	Unknown
CCDC90A							-1.9										C6orf79		CR550922	Chromosome 6 open reading frame 79 (C6orf79)	Unknown
LOC789063							-2										C6orf85		CN437467	Chromosome 6 open reading frame 85 (C6orf85)	Unknown
C4H7ORF23							-2.4										C7orf23		BF039978	Chromosome 7 open reading frame 23 (C7orf23)	Unknown
ENHO			2.2														C8H9orf165	XM_001252082	CR453991	cDNA	Unknown
MGC127919			2.4														C9orf123		CN442087	Chromosome 9 open reading frame 123 (C9orf123)	Unknown
LOC786832						-3.2											C9orf125		CN441259	Chromosome 9 open reading frame 125 (C9orf125)	Unknown
C9ORF25			2.1														C9orf25		AW462803	Chromosome 9 open reading frame 25 (C9orf25)	Unknown
LOC613747			-1.9												1.9		C9orf88		BF041211	Chromosome 9 open reading frame 88 (C9orf88)	Unknown
CA3		-2.2					2.5										CA3		CN438145	Carbonic anhydrase III, muscle specific (CA3)	One-carbon compound metabolism
CACNB1							1.7										CACNB1		CR453256	Calcium channel, voltage-dependent, beta 1 subunit (CACNB1)	Calcium ion transport; muscle contraction
CACNB3																	CACNB3		AF174419	Calcium channel, voltage-dependent, beta 3 subunit
CAP2		-2.6					2										CAP2		CN435691	CAP, adenylate cyclase-associated protein, 2 (CAP2)	Establishment and/or maintenance of cell polarity; adenylate cyclase activation
CAP2																	CAP2		CN435691	CAP, adenylate cyclase-associated protein, 2 (CAP2)	Establishment and/or maintenance of cell polarity; signal transduction; adenylate cyclase activation
RASA3						-1.7											CARD9	BT029870	BF039662	CASPASE RECRUITMENT DOMAIN-CONTAINING PROTEIN 9; CARD9
CASP7	-2.4																CASP7		BF040440	Caspase 7, apoptosis-related cysteine peptidase (CASP7)	Apoptosis
CBR4									-1.6								CBR4		CN438430	Carbonyl reductase 4	Metabolism and energy production
CCDC12									-2.2								CCDC12		DT834348	Coiled-coil domain containing 12	Unknown functions
CCDC47			1.8														CCDC47	BT030561	AW464413	Coiled-coil domain containing 47 9CCDC47)
CCDC61			-3														CCDC61	XM_593447	CN439115	cDNA	Unknown
CCL2					5	12.6	13.9										CCL2		BF043950	Cemokine (C-C motif) ligand 2 (CCL2)	Calcium ion homeostasis; anti-apoptosis; chemotaxis; inflammatory response; humoral immune response; cell adhesion; G-protein si... <Preview truncated at 128 characters>
CCL8				3.5	7.1	9.6	6.2										CCL8		NM_174007	Chemokine (C-C motif) ligand 8 (CCL8)	Calcium ion transport; exocytosis; chemotaxis; inflammatory response
CCNF							-2										CCNF		DR749363	Cyclin F (CCNF)	Regulation of progression through cell cycle
CCNG1							-2.4										CCNG1		CN441620	Cyclin G1 (CCNG1)	Regulation of cyclin dependent protein kinase activity; cell cycle
MRPS36			2.5														CCNH		AW289226	Cyclin H (CCNH)	Regulation of progression through cell cycle; regulation of cyclin-dependent protein kinase activity; DNA repair; transcription ... <Preview truncated at 128 characters>
RPS5							-2.1										CCT6A		CR454705	Chaperonin containing TCP1, subunit 6A (zeta 1) (CCT6A)	Protein folding
CCT6B			2.4														CCT6B	BC102527	CN440031	CHAPERONIN-CONTAINING T-COMPLEX POLYPEPTIDE 1, SUBUNIT 6B; CCT6B
CCT7			2.1														CCT7		CN441024	Chaperonin containing TCP1, subunit 7 (eta) (CCT7)	Regulation of progression through cell cycle; protein folding
CD109							1.9										CD109		CN439156	CD109 molecule (CD109)	Immune response
FCGR3A					2.4	3.8	3.1										CD16b	FCGR3B	BM364531	Fc fragment of IgG, low affinity IIIb, receptor (CD16b) (FCGR3B)	Immune response
CD44			3														CD44		BF045864	CD44 molecule (Indian blood group) (CD44)	Cell adhesion
CD48																	CD48		BF042861	CD48 molecule	Defense response
CD5						-2.1											CD5		NM_173899	CD5 molecule (CD5)	Cell recognition; cell proliferation
CD63									-2.3								CD63		BC102657	CD63 molecule	Cell growth, differentiation, and development
CD74			-2.7			-2.1											CD74		AW463930	CD74 molecule, major histocompatibility complex, class II invariant chain (CD74)	Prostaglandin biosynthesis; protein folding and transport; immune response; cell proliferation; humoral defense mechanism; antig... <Preview truncated at 128 characters>
CD79A			-3.1			-2.2	-4.1										CD79A		NM_174266	CD79a molecule, immunoglobulin-associated alpha (CD79A)	Defense response; cell surface receptor-linked signal transduction
CDK1			-2.2				-2										CDC2		NM_174016	Cell division cycle 2, G1 to S and G2 to M (CDC2)	Regulation of progression through cell cycle; protein amino acid phosphorylation
CDC20							-1.9										CDC20		CN434645	CDC20 cell division cycle 20 homolog (CDC20)	Regulation of progression through cell cycle; ubiquitin-dependent protein catabolism
CDC26			3.1														CDC26		CN435743	Cell division cycle 26 (CDC26)	Cytokinesis
ZCCHC14						-2											CDC42BPG	BC149211	CN440486	Hypothetical LOC388079	Unknown
CDCA2						-2.5	-2.6										CDCA2		CR452311	Cell division cycle associated 2 (CDCA2)	Unknown
CDCA7			-2.5														CDCA7	BC108118	CR552488	CELL DIVISION CYCLE-ASSOCIATED PROTEIN 7; CDCA7
CDH1							2.5										CDH1		CR455078	Cadherin 1, type 1, E-cadherin (epithelial) (CDH1)	Cell adhesion
CDK10									-2								CDK10		BC109954	Cyclin-dependent kinase \(CDC2-like) 10	Cell growth, differentiation, and development
CDK2			2.2														CDK2		AW465591	Cyclin-dependent kinase 2 (CDK2)	G2/M transition of mitotic cell cycle; regulation of DNA replication; positive regulation of cell proliferation
CDK4			2														CDK4		AW465448	Cyclin-dependent kinase 4 (CDK4)	Regulation of progression through cell cycle; cell proliferation
CEBPB						2.2	2.4										CEBPB		AW461572	CCAAT/enhancer binding protein (C/EBP), beta (CEBPB)	Transcription regulation; acute-phase response; inflammatory response
CEBPD					3.4	3.1	2.5										CEBPD		BF041807	CCAAT/enhancer binding protein (C/EBP), delta (CEBPD)	Transcription regulation
CENTA1									-3.2								CENTA1		D89940	Centaurin, alpha 1	Signal transduction
LOC613668					1.8		2.3										CENTD1		BM363713	Centaurin, delta 1 (CENTD1)	Signal transduction; regulation of GTPase activity
CEPT1						1.9											CEPT1	XM_868988	BF042816	cDNA	Unknown
CFL1									-2.7								CFL1		BC103077	Cofilin 1 \(non-muscle)	Cytoskeletal and Microtubule-based functions
CFLAR							2										CFLAR		AW464057	CASP8 and FADD-like apoptosis regulator (CFLAR)	Proteolysis; regulation of apoptosis; positive regulation of I-kappaB kinase/NF-kappaB cascade
CHCHD9				1.7													CHCHD2		CN440365	Coiled-coil-helix-coiled-coil-helix domain containing 2 (CHCHD2)	Unknown
CHCHD7							1.6										CHCHD7		CR551658	Coiled-coil-helix-coiled-coil-helix domain containing 7 (CHCHD7)	Unknown
SYNCRIP																	CHERP	BC153841	CN438659	cDNA	Unknown
CHKA									-1.5								CHKA		BF040096	Choline kinase alpha	Metabolism and energy production
CHP			-1.7														CHP		CN433821	Calcium binding protein P22 (CHP)	Potassium ion transport; small GTPase-mediated signal transduction
CHRNA5			2.1														CHRNA5		NM_174514	Cholinergic receptor, nicotinic, alpha 5 (CHRNA5)	Ion transport; signal transduction; synaptic transmission
MGC155295			1.6														CHRNB1		CN437227	Discs, large (Drosophila) homolog-associated protein 4 (DLGAP4)	Cell-cell signaling
CHRNB1			2.3														CHRNB1		BM364027	Cholinergic receptor, nicotinic, beta polypeptide 1 (muscle) (CHRNB1)	Ion transport; signal transduction; synaptic transmission
CHRNE						3.5	2.8										CHRNE		NM_174272	Cholinergic receptor, nicotinic, epsilon (CHRNE)	Ion transport; muscle contraction; signal transduction; synaptic transmission
CLCN7			-1.9														CLCN7		CN439301	Chloride channel 7 (CLCN7)	Ion transport
CLIC4							2.7										CLIC4		DR749361	Chloride intracellular channel 4 (CLIC4)	Chloride ion transport; cell differentiation; negative regulation of cell migration
CLN5			2.6														CLN5		DR697519	Ceroid-lipofuscinosis, neuronal 5 (CLN5)	Unknown
CLTC	-1.6																CLTC		CN436419	Clathrin, heavy polypeptide (Hc) (CLTC)	Intracellular protein transport
CMTM3			-1.8														CMTM3		CV798784	CKLF-like MARVEL transmembrane domain containing 3 (CMTM3)	Chemotaxis; sensory perception
CNP			1.8														CNP		AW463518	2Æ,3Æ-cyclic nucleotide 3Æ phosphodiesterase (CNP)	Synaptic transmission; cyclic nucleotide catabolism
CNTN1							2										CNTN1		NM_174280	Contactin 1 (CNTN1)	Cell adhesion; Notch signaling pathway
COL4A1							2.9										COL4A1		BF045718	Similar to collagen, type IV, alpha 1 (COL4A1)	Phosphate transport; extracellular matrix structural constituent
COL6A2									-2.5								COL6A2		DV918071	Collagen, type VI, alpha 2	Cell adhesion and migration
COMMD9									-1.7								COMMD9		DN513269	COMM domain containing 9	Unknown functions
SLAIN2			2.1														COPS3	BC146183	BF039339	COP9, SUBUNIT 3; COPS3
ENOX2			1.9														COVA1		CN438121	Cytosolic ovarian carcinoma antigen 1 (COVA1)	Regulation of cell growth; electron transport; ultradian rhythm
COX6B2			2														COX6B2		CN441214	Cytochrome c oxidase subunit VIb polypeptide 2 (COX6B2)	Electron transport
COX8			2.2														COX8A		CN433029	Cytochrome c oxidase subunit 8A (ubiquitous) (COX8A)	Electron transport
CPSF1			2.7						-1.9								CPFS1		BF040614	Cleavage and polyadenylation specific factor 1, 160kDa (CPFS1)	mRNA polyadenylylation; mRNA cleavage
4932441K18RIK			-1.8														CREB3	BT026325	BF040104	cAMP RESPONSE ELEMENT-BINDING PROTEIN 3
CRIP1							-3.8										CRIP1		BF041729	Cysteine-rich protein 1 (intestinal) (CRIP1)	Cell proliferation; antimicrobial humoral response
RPS6KA2			-1.9														CRLF3	XM_606442	CR455690	Transcribed locus	Unknown
CSDA																	CSDA		DV797804	Cold shock domain protein A	Negative regulation of transcription; response to cold
LOC616265			2.2														csn1s1	X59856	CN434359	cDNA	Unknown
LOC506060			-2.5														CSNK1G2		CN439207	Casein kinase 1, gamma 2 (CSNK1G2)	Wnt receptor signaling pathway
CSPG4							2.3										CSPG4		CK778818	Chondroitin sulfate proteoglycan 4 (melanoma-associated) (CSPG4)	Angiogenesis; signal transduction; tissue development; cell differentiation
CSPG5							2.1										CSPG5		CN440164	Chondroitin sulfate proteoglycan 5 (CSPG5)	Regulation of cell growth; nervous system development; cell differentiation; intracellular transport
CSRP2							4.3										CSRP2		CN439691	Cysteine and glycine-rich protein 2 (CSRP2)	Muscle development; cell proliferation; organ morphogenesis; cell growth and differentiation
CSTB									-2								CSTB		CN438674	Cystatin B \(stefin B)	Protein biosynthesis, processing, and catabolism
CTF1									-1.6								CTF1		BF040884	Cardiotrophin 1	Cell growth, differentiation, and development
CTGF							3.4										CTGF		AW267007	Connective tissue growth factor (CTGF)	Regulation of cell growth; DNA replication; cell motility; cell adhesion; epidermis development; response to wounding
CTSC			-2														CTSC		CR551044	Cathepsin C (CTSC)	Proteolysis; immune response
CTSL1									-2.1								CTSL1	BC134741	CK946261	LEGUMAIN; LGMN
CXCR4															-7.7		CXCR4		NM_174301	Chemokine \(C-X-C motif) receptor 4	G-protein coupled receptor protein signaling pathway; immune response
CYB5						-3.6	-2.8							-1.9			CYB5		CN435369	CYB5 protein (CYB5)	Unknown
CYB5R1			-3.1														CYB5R1		BE756419	Cytochrome b5 reductase 1 (CYB5R1)	electron transport
CYB5R4																	CYB5R4		BC109569	Cytochrome b5 reductase 4	Electron transport
LOC526885							-1.9										DALRD3		BM362974	DALR anticodon binding domain containing 3 (DALRD3)	Arginyl-tRNA aminoacylation
LOC538492			3.4				4.1										DAP	BT020623	CR452647	DEATH-ASSOCIATED PROTEIN; DAP
DDIT4						2.6	3.5										DDIT4	REDD1	BM366955	DNA-damage-inducible transcript 4 (DDIT4) (REDD1)	Stress response
DDX20			1.8														DDX20		AW346328	DEAD (Asp-Glu-Ala-Asp) box polypeptide 20 (DDX20)	Assembly of spliceosomal tri-snRNP; nuclear mRNA splicing
DDX23			-3														DDX23		BF041597	DEAD (Asp-Glu-Ala-Asp) box polypeptide 23 (DDX23)	Nuclear mRNA splicing
DDX3X						1.8											DDX3X		CN440452	DEAD (Asp-Glu-Ala-Asp) box polypeptide 3, X-linked (DDX3X)	Helicase activity; RNA processing
DENND3							2.3										DENND3		CR551319	DENN/MADD domain containing 3 (DENND3)	Signal transduction
UFSP2			-1.7														DH10B	BC149833	CN436775	Transcribed locus	Unknown
DHX37			-2														DHX37		CN438264	DEAH (Asp-Glu-Ala-His) box polypeptide 37 (DHX37)	Unknown
LOC511433					1.8		2										DLC1		CR553375	Deleted in liver cancer 1 (DLC1)	Cytoskeleton organization and biogenesis; signal transduction; regulation of cell adhesion; negative regulation of cell growth
DMWD									-3.5								DMWD		CK847171	Dystrophia myotonica-containing WD repeat motif
DNAJA2					1.9												DNAJA2		BF044731	DnaJ (Hsp40) homolog, subfamily A, member 2 (DNAJA2)	Cell cycle regulation protein folding; positive regulation of cell proliferation
DNASE1							2.1										DNASE1		NM_174534	Deoxyribonuclease I (DNASE1)	DNA catabolism; apoptosis
DNCL1														1.5			DNCL1		DV893084	Similar to cytoplasmic dynein light chain 1	Microtubule-based process
DNMT3A			-2.9														DNMT3A		AW289242	DNA (cytosine-5-)-methyltransferase 3 alpha (DNMT3A)	DNA methylation; imprinting
DPYD			1.8														DPYD		CN437997	Dihydropyrimidine dehydrogenase (DPYD)	Electron transport; de novo pyrimidine base biosynthesis; uracil and thymidine
TBX3									-2.2								DPYSL5	BC152833	BF040741	DIHYDROPYRIMIDINASE-LIKE 5
RCAN1			2.5	2.5			2.6										DSCR1		BF041330	Down syndrome critical region gene 1 (DSCR1)	Calcium-mediated signal transduction; central nervous system development; circulation
DTNB			2.5						-1.5								DTNB		BM363749	Dystrobrevin, beta (DTNB)	Cytoskeleton-related functions
DUSP1						3.7	6.8										DUSP1		AW465681	Dual specificity phosphatase 1 (DUSP1)	Response to oxidative stress; cell cycle
DUSP6						3											DUSP6		BF041230	Dual specificity phosphatase 6 (DUSP6)	Regulation of progression through cell cycle; inactivation of MAPK activity
DUT							-2.9										DUT		CR452397	dUTP pyrophosphatase (DUT)	DNA replication; nucleotide (dUTP) metabolism
E2F5			2.4														E2F5		BF043963	E2F transcription factor 5, p130-binding (E2F5)	Regulation of progression through cell cycle; transcription regulation
E2F6			2.3														E2F6		BF039950	E2F transcription factor 6 (E2F6)	Regulation of progression through cell cycle; transcription regulation
EFTUD2					1.8												EFTUD2		BM363134	Elongation factor Tu GTP binding domain containing 2 (EFTUD2)	Nuclear mRNA splicing; protein biosynthesis
EGFL7									-1.6								EGFL7		BC111261	EGF-like-domain, multiple 7	Cell adhesion and migration
EGLN3			2.6														EGLN3		AW465035	Egl nine homolog 3 (EGLN3)	Apoptosis; protein metabolism
EIF1			2.1														EIF1		BM366260	Eukaryotic translation initiation factor 1 (EIF1)	Protein biosynthesis; regulation of translational initiation; response to stress
EIF1B			3														EIF1B		BF440279	Eukaryotic translation initiation factor 1B (EIF1B)	Protein biosynthesis; regulation of translational initiation
EIF2AK2						2											EIF2AK2		NM_178109	Eukaryotic translation initiation factor 2-alpha kinase 2 (EIF2AK2)	Transcription regulation; apoptosis; immune response; cell cycle; negative regulation of cell proliferation
EIF2C2																	EIF2C2		AY533678	Eukaryotic translation initiation factor 2C, 2	Protein biosynthesis
EIF3F							-2.1										EIF3F	XM_591540	DR749250	EUKARYOTIC TRANSLATION INITIATION FACTOR 3, SUBUNIT F; EIF3F
SPG11							1.9										EIF3S1		CR452342	Eukaryotic translation initiation factor 3, subunit 1 alpha, 35kDa (EIF3S1)	Protein biosynthesis; regulation of translational initiation
EIF3H			-4.1														EIF3S3		CN440565	Eukaryotic translation initiation factor 3, subunit 3 gamma, 40kDa (EIF3S3)	Protein biosynthesis; regulation of translational initiation
EIF4A1							2.2										EIF4A1		AW464970	Eukaryotic translation initiation factor 4A, isoform 1 (EIF4A1)	Protein biosynthesis
EIF4ENIF1					3.2	2.7	2.8										EIF4ENIF1		CN433201	Eukaryotic translation initiation factor 4E nuclear import factor 1 (EIF4ENIF1)	Protein transport; translation
EIF4G2				2.1													EIF4G2		AW267040	Eukaryotic translation initiation factor 4 gamma, 2 (EIF4G2)	Regulation of translational initiation; cell cycle arrest; cell death
ELK3															-1.8		ELK3		CN441547	ELK3, ETS-domain protein \(SRF accessory protein 2)	Transcription regulation; signal transduction
ELK4									-1.6								ELK4		AW463194	ELK4, ETS-domain protein \(SRF accessory protein 1)	Transcription regulation
ELOF1									-1.5								ELOF1		CK774090	Elongation factor 1 homolog	Transcription regulation
EML3			2.1														EML3		BM362335	Echinoderm microtubule associated protein like 3 (EML3)	May modify the assembly dynamics of microtubules
EMX1			-2.7														EMX1		CN437946	Empty spiracles homolog 1 (Drosophila) (EMX1)	Transcription regulation; development
ENOPH1																	ENOPH1		CN434650	E-1 enzyme \(MASA)	Metabolism
ENTPD8									-2.9								ENTPD8		AW461756	Ectonucleoside triphosphate diphosphohydrolase 8	Metabolism and energy production
EPHA2							1.9										EPHA2		BE479034	EPH receptor A2 (EPHA2)	Transmembrane receptor protein tyrosine kinase signaling pathway; development
EPN2			2.6														EPN2		CN434981	Similar to epsin 2 isoform b (EPN2)	regulation of clathrin-mediated endocytosis
EPS15L1			3						-2.2								EPS15L1		AW463807	Epidermal growth factor receptor pathway substrate 15-like 1 (EPS15L1)	Endocytosis
EPS8L1			2.2						-1.5								EPS8L1		AW462315	EPS8-like 1 (EPS8L1)	Unknown
ERBB2IP			2														ERBB2IP		CN441074	Erbb2 interacting protein (ERBB2IP)	Cell cycle; cell adhesion; epidermal growth factor receptor and integrin-mediated signaling pathways; cell growth; intermediate ... <Preview truncated at 128 characters>
ERGIC3			-2														ERGIC3		CR454878	ERGIC and golgi 3 (ERGIC3)	ER to Golgi vesicle-mediated transport
ERO1L							3.2										ERO1L		AW461864	ERO1-like (ERO1L)	Electron transport; chaperone cofactor dependent protein folding
F2R			-2.8														F2R	F2R	AJ693807	Coagulation factor II (thrombin) receptor (F2R)	Regulation of progression through cell cycle; apoptosis; caspase activation; cell motility; G-protein coupled receptor protein s... <Preview truncated at 128 characters>
F3			2.2		2.6	5.1	11.9							2.2			F3		BF041314	Coagulation factor III (thromboplastin, tissue factor) (F3)	Immune response; blood coagulation
LOC538104															-1.6		FACE-1		AW464059	Similar to CAAX prenyl protease 1 homolog (Prenyl protein-specific endoprotease 1) (Farnesylated-proteins converting enzyme 1) (... <Preview truncated at 128 characters>	Proteolysis
FAM103A1															-1.6		FAM103A1		BC102563	Family with sequence similarity 103, member A1	Unknown
FAM125A	1.9		2.8														FAM125A	BC102323	BF039417	Hypothetical protein BC011840	Unknown
FAM18B							2										FAM18B		AW462368	Family with sequence similarity 18, member B (FAM18B)	Unknown
FAM44A									-2.3								FAM44A		BM362239	Family with sequence similarity 44, member A
FAM44B							1.6										FAM44B		BF044373	Family with sequence similarity 44, member B (FAM44B)	Unknown
FAM53C			2.3														FAM53C		AW462414	Family with sequence similarity 53, member C (FAM53C)	Unknown
FAM53C										-2							FAM53C	BC114114	BC114114	FAMILY WITH SEQUENCE SIMILARITY 53, MEMBER C; FAM53C
FAM55C			2.9						-1.7								FAM55C		AW465465	Family with sequence similarity 55, member C (FAM55C)	Unknown
FAM96A						-2											FAM96A		BF040156	Family with sequence similarity 96, member A (FAM96A)	Unknown
FBXL12									-1.7								FBXL12		CN438147	F-box and leucine-rich repeat protein 12	Protein biosynthesis, processing, and catabolism
FBXO25							-1.9										FBXO25		BF039392	F-box protein 25 (FBXO25)	Protein ubiquitination
FBXO42			1.9														FBXO42		AW463585	F-box protein 42 (FBXO42)	Ubiquitin cycle
FBXW5			2.5						-2.1								FBXW5		CB460716	F-box and WD-40 domain protein 5 (FBXW5)	Ubiquitin cycle
FBXW8			2.1														FBXW8		CR552518	F-box and WD-40 domain protein (FBXW8)	Ubiquitin cycle
FDPS			3														FDPS		CR454205	Farnesyl diphosphate synthase (farnesyl pyrophosphate synthetase, dimethylallyltranstransferase, geranyltranstransferase) (FDPS)	Cholesterol biosynthesis; isoprenoid biosynthesis
FEM1A			2.2						-2								FEM1A		BF040621	Fem-1 homolog a (FEM1A)	Sex determination
FEZ1		-2.7															FEZ1		AJ671670	Fasciculation and elongation protein zeta 1 (zygin I) (FEZ1)	Cell adhesion; nervous system development; axon guidance
FGFR1						-1.8											FGFR1		AJ004952	Fibroblast growth factor receptor 1 (fms-related tyrosine kinase 2, Pfeiffer syndrome) (FGFR1)	MAPKKK cascade; skeletal development; cell growth
FGFR3						-3.5	-3.2										FGFR3		CN442012	Fibroblast growth factor receptor 3 (achondroplasia, thanatophoric dwarfism) (FGFR3)	MAPKKK cascade; skeletal development; cell growth
FLNB							6.1										FINB		CR454496	Filamin, beta (FINB)	Striated muscle development
FKBP2						-2.4											FKBP2		CN432417	FK506 binding protein 2, 13kDa (FKBP2)	Protein folding
FLCN			2.9														FLCN		CR456184	Folliculin (FLCN)	Regulation of tumorigenesis (putative); might be involved in energy and/or nutrient sensing through the AMPK and mTOR signaling ... <Preview truncated at 128 characters>
FLOT2			2.4														FLOT2		BM366445	Flotillin 2 (FLOT2)	Cell adhesion; epidermis development
FN1																	FN1		DV788981	Fibronectin 1	Acute-phase response; cell adhesion and migration; transmembrane receptor protein tyrosine kinase signaling pathway; metabolism;... <Preview truncated at 128 characters>
FNTA			2.4														FNTA		DR697402	Farnesyltransferase, CAAX box, alpha (FNTA)	Transforming growth factor beta receptor signaling pathway; protein amino acid prenylation, farnesylation, and geranylgeranylati... <Preview truncated at 128 characters>
FOS				2.5	4.6	4.8	3.5										FOS		BF039907	FBJ murine osteosarcoma viral oncogene homolog (FOS)	DNA methylation; transcription regulation; inflammatory response
FOSL2						2.1	2.3										FOSL2	FRA2	AW463531	FOS-like antigen 2 (FOSL2) (FRA2)	Transcription regulation; regulation of cell proliferation, differentiation, and transformation; cell death
FOSL2						2.2	2.3										FOSL2	FRA2	AW465865	Similar to fos-like antigen 2 (FOSL2) (FRA2)	Transcription regulation; regulation of cell proliferation, differentiation, and transformation; cell death
FOXC1			1.9														FOXC1		CR456185	Forkhead box C1 (FOXC1)	Ossification; transcription regulation
FSTL3			2.7														FSTL3		DR749261	Follistatin-like 3 (secreted glycoprotein) (FSTL3)	May have a role in leukemogenesis
A2BP1			2.8														FTS		CR553319	Ataxin 2-binding protein 1 (FTS)	Apoptosis; ubiquitin cycle
AKTIP			2.8														FTS		BF039780	Fused toes homolog (FTS)	Ubiquitin cycle
FUNDC2			-2.8														FUNDC2		NM_174338	FUN14 domain containing 2 (FUNDC2)	Unknown
LOC787914			-1.9														FUS		CR453525	Fusion (involved in t(12;16) in malignant liposarcoma) (FUS)	Unknown
FXYD7									-1.5								FXYD7		AV662599	FXYD domain containing ion transport regulator 7	Transport
FZD5			-3.2														FZD5		AW462410	Frizzled homolog 5 (FZD5)	Establishment of tissue polarity; development; Wnt receptor signaling pathway
GAB2							2.3										GAB2		CN432451	GRB2-associated binding protein 2 (GAB2)	The principal activator of phosphatidylinositol-3 kinase in response to activation of the high affinity IgE receptor
GADD45B			2.1				2.5										GADD45B		BF440435	Growth arrest and DNA-damage-inducible, beta (GADD45B)	Activation of MAPKKK activity; apoptosis; response to stress; cell differentiation
GALNT11			2.2														GALNT11		CN442374	UDP-N-acetyl-alpha-D-galactosamine:polypeptide N-acetylgalactosaminyltransferase 11 (GalNAc-T11) (GALNT11)	Protein modification
GALNT3						2.7	2.7										GALNT3		AW463251	UDP-N-acetyl-alpha-D-galactosamine:polypeptide N-acetylgalactosaminyltransferase 3 (GalNAc-T3) (GALNT3)	Carbohydrate metabolism; protein modification
GAPDH																	GAPDH		AF077815	Glyceraldehyde-3-phosphate dehydrogenase	Glucose metabolism; glycolysis
GAS7			2														GAS7		CN432697	Growth arrest-specific 7 (GAS7)	Cell cycle arrest; nervous system development; cell differentiation
GCHFR							-2.7										GCHFR		BM366222	GTP cyclohydrolase I feedback regulator (GCHFR)	Nitric oxide biosynthesis; neurotransmitter metabolism
GCLC			1.9														GCLC	AY957499	CN437063	GLUTAMATE-CYSTEINE LIGASE, CATALYTIC SUBUNIT; GCLC	Unknown
GGT7							2.2										GGTL3		AW314824	Gamma-glutamyltransferase-like 3 (GGTL3)	Glutathione biosynthesis
GGTLA1															1.8		GGTLA1	XM_001253659	CR552992	GAMMA-GLUTAMYLTRANSFERASE 5; GGT5
GHRL									-2.7								GHRL		AF350329	Ghrelin/obestatin preprohormone	Signal transduction
GIPC2							-3.2										GIPC2		BF045443	GIPC PDZ domain containing family, member 2 (GIPC2)	Unknown
GIT1			2.5														GIT1		AW463852	G protein-coupled receptor kinase interactor 1 (GIT1)	Regulation of G-protein coupled receptor protein signaling pathway; regulation of GTPase activity
GJA1							3.2										GJA1		CR456025	Gap junction protein, alpha 1, 43kDa (connexin 43) (GJA1)	Transport; muscle contraction; cell-cell signaling; heart development; sensory perception of sound; gap junction assembly; posit... <Preview truncated at 128 characters>
SCG5						-2.3											GJB1		CR551878	Gap junction protein, beta 1, 32kDa (connexin 32, Charcot-Marie-Tooth neuropathy, X-linked) (GJB1)	Transport; cell-cell signaling; nervous system development
GJA3			3.1				2										GJB2		BF043281	Gap junction protein, beta 2, 26kDa (connexin 26) (GJB2)	Transport; cell-cell signaling; sensory perception of sound
GLI3																	GLI3		CR452730	GLI-Kruppel family member GLI3 \(Greig cephalopolysyndactyly syndrome)	Protein import into nucleus; transcription regulation; signal transduction; morphogenesis
GLRA1									-2								GLRA1		AF268375	Glycine receptor, alpha 1 \(startle disease/hyperekplexia, stiff man syndrome)	Signal transduction
GLTSCR2									-2.7								GLTSCR2		BC109969	Glioma tumor suppressor candidate region gene 2
GLUL				2													GLUL		AW465870	Glutamate-ammonia ligase (glutamine synthetase) (GLUL)	Regulation of neurotransmitter levels; glutamine biosynthesis; nitrogen compound metabolism
GM2A							-1.7										GM2A		CN438214	GM2 ganglioside activator (GM2A)	Lipid and glycosphingolipid metabolism
GMFB			1.9														GMFB		CR552036	Glia maturation factor, beta (GMFB)	Cell growth
GNAO1							2.1										GNAO1		CN437666	Guanine nucleotide binding protein (G protein), alpha activating activity polypeptide O (GNAO1)	Muscle contraction; G-protein coupled receptor protein signaling pathway; nervous system development; axon guidance
GNG5							2.1										GNG5		AW465466	Guanine nucleotide binding protein (G protein), gamma 5 (GNG5)	G-protein coupled receptor protein signaling pathway
GPC1			2.3														GPC1		AW326516	Glypican 1 (GPC1)	Development
GPR155							-8.5										G-protein coupled receptor PGR22		CR452358	Similar to Protein GPR155 (G-protein coupled receptor PGR22)	Unknown
GPX4			-4														GPX4		CN435446	Glutathione peroxidase 4 (phospholipid hydroperoxidase) (GPX4)	Phospholipid metabolism; response to oxidative stress; development
GRPEL2			2														GRPEL2		AW462623	GrpE-like 2, mitochondrial (GRPEL2)	Protein folding
GRTP1						-1.8	-1.8										GRTP1		CN438048	GH regulated TBC protein 1 (GRTP1)	Unknown
GTF2A2			2.3						-1.7								GTG2A2		CR452841	General transcription factor IIA, 2, 12kDa (GTG2A2)	Transcription regulation
GUCA1A			1.8														GUCA1A		NM_174546	Guanylate cyclase activator 1¬ (retina) (GUCA1A)	Signal transduction; sensory perception; visual perception
GUK1							2										GUK1		BM364206	Guanylate kinase 1 (GUK1)	GTP biosynthesis
LOC783920						2.4	2										GVIN1		CV798732	GTPase, very large interferon inducible 1 (GVIN1)	Unknown
H17C12ORF65									-1.5								H17C12ORF65	XM_584238	BM366070	Hypothetical protein FLJ38663	Unknown functions
LOC789064							1.9										HDLBP)		AY563792	Similar to Vigilin (High density lipoprotein-binding protein) (HDL-binding protein) (HDLBP)	Lipid metabolism and transport
HERC6						4.3	2.4										HERC6		CN435536	Hect domain and RLD 6 (HERC6)	Ubiquitin cycle
HEY1																	HEY1		CR451719	Hairy/enhancer-of-split related with YRPW motif 1	Transcription regulation; nervous system development; organ morphogenesis
HIF1A					1.8	2.9	4.6										HIF1A		CN439520	Hypoxia-inducible factor 1, alpha subunit (basic helix-loop-helix transcription factor) (HIF1A)	Response to hypoxia; electron transport; transcription regulation; signal transduction
LOC618824							-4.4										HIST1H2A		BM365292	Histone 1, H2ag (HIST1H2A)	Nucleosome assembly; chromosome organization and biogenesis
HLA-C																	HLA-C		BM362961	Major histocompatibility complex, class I, C	Antigen processing and presentation
BOLA-DOB							-2.2										HLA-DOB		TC229831	Major histocompatibility complex, class II, DO beta (HLA-DOB)	Immune response; antigen processing and presentation
BOLA-DRB3			-4.1								-1.6						HLA-DRB3		CO889316	Major histocompatibility complex, class II, DR beta 3 (HLA-DRB3)	Immune response; antigen processing and presentation
HMGA2			2.1														HMGA2		CN438424	High mobility group AT-hook 2 (HMGA2)	Establishment and/or maintenance of chromatin architecture; transcription regulation; chromosome organization and biogenesis; de... <Preview truncated at 128 characters>
LOC532409														3.2			HMGB3		CN433590	cDNA, similar to high-mobility group box 3	Transcription regulation; development
HNRNPA3	-1.8																HNRPA3		CR552434	Similar to heterogeneous nuclear ribonucleoprotein A3 (HNRPA3)	Cytoplasmic trafficking
HNRNPU			-2														HNRPU		CN442307	Heterogeneous nuclear ribonucleoprotein U (scaffold attachment factor A) (HNRPU)	RNA processing
HNT																	HNT		CO884202	Neurotrimin	Cell adhesion; neuron recognition
HOXA9			2.2														HOXA9		CR553153	Homeobox A9 (HOXA9)	Transcription regulation; development
HOXB7						-2											HOXB7		CN442322	Homeobox B7 (HOXB7)	Transcription regulation; development
LOC540250			-2.8														HOXD9		BF045946	Homeobox D9 (HOXD9)	Transcription regulation; development
HRSP12							2.1										HRSP12		BF042842	Heat-responsive protein 12 (HRSP12)	Regulation of translational termination
HS3ST3B1						-2											HS3ST3B1		CN435593	Heparan sulfate (glucosamine) 3-O-sulfotransferase 3B1 (HS3ST3B1)	Heparan sulfate proteoglycan biosynthesis
HSP90AB1			-2.8														HSP90AB1		BF040464	Heat shock protein 90kDa alpha (cytosolic), class B member 1 (HSP90AB1)	Protein folding; response to unfolded protein; positive regulation of nitric oxide biosynthesis
HSPB8						-1.8											HSPB8		CN436749	Heat shock 22kDa protein 8 (HSPB8)	Protein folding; stress response
HSPC176									-2.1								HSPC176		DV868948	Hematopoietic stem/progenitor cells 176	Transport
HYAL1										1.7							HYAL1		BT021035	Hyaluronoglucosaminidase 1
IARS			2.2														IARS		AV613406	Isoleucine-tRNA synthetase (IARS)	Protein biosynthesis; isoleucyl-tRNA aminoacylation
RNF19B				2.2		3.3	3.5								1.8		IBRDC3		CN442283	IBR domain containing 3 (IBRDC3)	Protein catabolism
IDH1						-2.4	-2.8										IDH1		AW462719	Isocitrate dehydrogenase 1 (NADP+), soluble (IDH1)	Carbohydrate metabolism; glyoxylate cycle; tricarboxylic acid cycle; isocitrate metabolism
IDH2							-2										IDH2		CR552406	Isocitrate dehydrogenase 2 (NADP+), mitochondrial (IDH2)	Carbohydrate metabolism; glyoxylate cycle; tricarboxylic acid cycle
IER3			2.5			3.6	6										IER3		BF039878	Immediate early response 3 (IER3)	Regulation of apoptosis; morphogenesis
IFI16			-2.3														IFI16		CK952947	Interferon, gamma-inducible protein 16 (IFI16)	Transcription regulation; immune response; cell proliferation; response to virus; monocyte differentiation; DNA damage response;... <Preview truncated at 128 characters>
IFI35									-1.9								IFI35		CK962041	Interferon-induced protein 35	Cell growth, differentiation, and development
IFIT5						1.9	2.2										IFIT5		BF440341	Interferon-induced protein with tetratricopeptide repeats 5 (IFIT5)	Immune response
IFITM1			2.4			2.7	3.3										IFITM3		NM_181867	Interferon induced transmembrane protein 3 (1-8U) (IFITM3)	Immune response; response to biotic stimulus
IFT20			2.5						-4.2								IFT20		BF046341	Intraflagellar transport 20 homolog (IFT20)	Cilia assembly; cell moility
IGLL1																	IGLL1		CK849081	Immunoglobulin lambda-like polypeptide 1	immune response
LOC513478						2.5											IL10RA		BM364841	Interleukin 10 receptor, alpha (IL10RA)	Immunosuppressiion of IL10, inhibition of proinflammatory cytokine synthesis; promotion of survival of progenitor myeloid cells ... <Preview truncated at 128 characters>
LOC407110							2										IL13RA1		AW464322	Interleukin 13 receptor, alpha 1 (IL13RA1)	Cell surface receptor linked signal transduction; mediates signaling processes that lead to the activation of JAK1, STAT3 and ST... <Preview truncated at 128 characters>
IL17RC							-1.6										IL17RC		BM364172	Interleukin 17 receptor C (IL17RC)	Immune response
IL28RA			1.8														IL28RA		CK949505	Interleukin 28 receptor, alpha (interferon, lambda receptor) (IL28RA)	Immune response
LOC616135							2.2										IL2RA	BC133546	BF040162	INTERLEUKIN 2 RECEPTOR, ALPHA; IL2RA	Unknown
IL8					7.2	18.9	9.4										IL8		BF039564	Interleukin 8 (IL8)	Angiogenesis; cell motility; chemotaxis; cell cycle arrest; G-protein coupled receptor protein signaling pathway; neutrophil act... <Preview truncated at 128 characters>
IMPA2																	IMPA2		DT857818	Transcribed locus, similar to inositol\(myo)-1\(or 4)-monophosphatase 2	Phosphate metabolism; signal transduction
IMPA2						-1.9											IMPA2)		AW461449	Inositol(myo)-1(or 4)-monophosphatase 2 (IMPA2)	Phosphate metabolism; signal transduction
IFNAC									-2.1								INFA13		NM_174085	Interferon, alpha 13	Cell growth, differentiation, and development
INPP5A						-1.9											INPP5A		BF041466	Inositol polyphosphate-5-phosphatase, 40kDa (INPP5A)	Cell communication
INPP5D									-3.2								INPP5D		BF041313	Inositol polyphosphate-5-phosphatase, 145kDa	Signal transduction
LOC100140708						-2.3	-1.6										IQGAP2		BF045795	IQ motif containing GTPase activating protein 2 (IQGAP2)	Small GTPase-mediated signal transduction; negative regulation of Ras protein signal transduction
IRF1			-2.4		2.2												IRF1		BM366536	Interferon regulatory factor 1 (IRF1)	Transcription regulation; immune response; negative regulation of progression through cell cycle
IRF2			2.6						-2								IRF2		AW356560	Interferon regulatory factor 2 (IRF2)	Negative regulation of transcription; immune response; cell proliferation
IRF8	-1.9					2											IRF8		BF440358	Interferon regulatory factor 8 (IRF8)	Immune response
ISG15						2.4	6.1								1.8		ISG15		CN432461	Interferon, alpha-inducible protein (clone IFI-15K) (ISG15)	Protein modification; immune response; cell-cell signaling
IRF9									-5.8								ISGF3G		BF039843	interferon-stimulated transcription factor 3, gamma 48kDa
ITGA2					2.5	1.9	3.9										ITGA2		L25886	Integrin, alpha 2 (CD49B, alpha 2 subunit of VLA-2 receptor) (ITGA2)	Cell adhesion; integrin-mediated signaling pathway; blood coagulation; organ morphogenesis
ITGA3							3.2										ITGA3		BF044715	Integrin, alpha 3 (antigen CD49C, alpha 3 subunit of VLA-3 receptor) (ITGA3)	Cell adhesion; integrin-mediated signaling pathway
ITGB1							2.9										ITGB1		CN440330	Integrin, beta 1 (fibronectin receptor, beta polypeptide, antigen CD29 includes MDF2, MSK12) (ITGB1)	Cellular defense response; cell adhesion; integrin-mediated signaling pathway; development; cell migration
ITGB1BP1			2.2						-1.6								ITGB1BP1	BC103215	BF044837	INTEGRIN CYTOPLASMIC DOMAIN-ASSOCIATED PROTEIN 1; ICAP1
ITGB2			-2														ITGB2		CR454674	Integrin, beta 2 (complement component 3 receptor 3 and 4 subunit) (ITGB2)	Apoptosis; inflammatory response; cell adhesion; leukocyte adhesion; integrin-mediated signaling pathway; development; regulatio... <Preview truncated at 128 characters>
ITGB5			3.3														ITGB5		AW461856	Integrin, beta 5 (ITGB5)	Cell adhesion; integrin-mediated signaling pathway; development
LOC535487			-2.3	-1.9		-1.9											ITPKA	BC123676	AW466177	INOSITOL 1,4,5-TRISPHOSPHATE 3-KINASE A; ITPKA
JUND					2.5												JUND		AW465610	Jun D proto-oncogene (JUND)	Transcription regulation
KBTBD11						-2.1											KBTBD11		AW462229	Kelch repeat and BTB (POZ) domain containing 11 (KBTBD11)	Unknown
KCNK12			2.1														KCNK12		CO879600	Potassium channel, subfamily K, member 12 (KCNK12)	Potassium ion transport
KIAA0157			2.4														KIAA0157	XM_587356	BF042552	KIAA0157	Unknown
KIF19			3.1														KIF19		CR456050	Kinesin family member 19 (KIF19)	Microtubule-based movement
KIF1A			2.3														KIF1A	XM_606290	CR453298	AXONAL TRANSPORTER OF SYNAPTIC VESICLES; ATSV
KIF5B									-3.6								KIF5B		BM366290	Kinesin family member 5B	Cytoskeletal and Microtubule-based functions
KITLG						-2.2											KITLG		NM_174375	KIT ligand (KITLG)	Cell adhesion; signal transduction; cell proliferation; organ morphogenesis; hemopoiesis
KLF10							2.3										KLF10		CV798719	Kruppel-like factor 10 (KLF10)	Negative regulation of transcription; development; transforming growth factor beta receptor signaling pathway; negative regulati... <Preview truncated at 128 characters>
KLF6					2.4	2	4										KLF6		BF040971	Kruppel-like factor 6 (KLF6)	Transcription regulation; cytokine and chemokine-mediated signaling
KLHDC3			3.7														KLHDC3		BF046510	Kelch domain containing 3 (KLHDC3)	Meiotic recombination
LOC643102							-1.8										KLHL12		CK394048	Similar to kelch-like 12 (KLHL12)	Unknown
KLHL22			1.9														KLHL22		BF045031	Kelch-like 22 (KLHL22)	Unknown
KLHL9			2.3														KLHL9		CN437566	Kelch-like 9 (KLHL9)	Unknown
ZNF34			2.1														KOX 32	ZNF34	CN438617	Zinc finger protein 34 (KOX 32) (ZNF34)	Transcription regulation
YWHAZ							2.3										KRTAP4-7	BC151711	CN438661	Transcribed locus	Unknown
LAD1			-2.8														LAD1		AW462126	Ladinin 1 (LAD1)	May contribute to the stability of the association of the epithelial layers with the underlying mesenchyme
LAMA5		-1.8															LAMA5		BF044918	Laminin, alpha 5 (LAMA5)	Cell adhesion and migration; development
LAP3						2	2.3										LAP3		BF046122	Leucine aminopeptidase 3 (LAP3)	Proteolysis; protein metabolism
LBR							-2.2										LBR		CN440990	Lamin B receptor (LBR)	Anchors the lamina and the heterochromatin to the inner nuclear membrane
LCP1							2										LCP1		BM363759	Lymphocyte cytosolic protein 1 (L-plastin) (LCP1)	Unknown
LDHA															-1.8		LDHA		DV791397	Lactate dehydrogenase A	Tricarboxylic acid cycle intermediate metabolism; anaerobic glycolysis
LDLR				2	2.3		2.6										LDLR		CR551180	Low density lipoprotein receptor (familial hypercholesterolemia) (LDLR)	Protein amino acid O-linked glycosylation; lipid metabolism and transport
LGALS3							-1.8										LGALS3		BF043295	Lectin, galactoside-binding, soluble, 3 (galectin 3) (LGALS3)	Cell adhesion
LGMN															-1.8		LGMN		AB060129	Legumain	Proteolysis
LIG1			-3.1														LIG1		CN433185	Ligase I, DNA, ATP-dependent (LIG1)	DNA replication; DNA repair; DNA recombination; cell cycle; morphogenesis; cell division
LOC509574							2										LILRB2		BM361940	Leukocyte immunoglobulin-like receptor, subfamily B (with TM and ITIM domains), member 2 (LILRB2)	Cellular defense response; cell surface receptor linked signal transduction; antimicrobial humoral response
LIMS2																	LIMS2		DR749232	Similar to LIM and senescent cell antigen-like domains 2	Focal adhesion; probably function in adherens junction
LMBR1					2.4												LMBR1		BF041985	Limb region 1 homolog (LMBR1)	Unknown
KHNYN																	LOC100124517	BC151400	BM363727	KIAA0323	Unknown
LOC100138035	2.2																LOC100138035	XM_001790577	BM363585	Hypothetical protein PRO1580	Unknown
LOC100138233			1.9														LOC100138233	XM_001790182	BF041523	Transcribed locus	Unknown
LOC100139799									-2.5								LOC100139799	XM_001787979	CR553367	cDNA	Unknown
LOC100139984									-2.1								LOC100139984	XR_042588	CO886530	Zinc finger-like	Unknown functions
LOC100140787									-8.1								LOC100140787	XM_001787331	DN518004	Hypothetical protein FLJ13197	Unknown
LOC506408			2.1														LOC506408	XM_582851	CR551667	Hypothetical protein DKFZp762I137	Unknown
MUL1			2.9						-2.4								LOC508406	XM_585175	BF040450	Similar to CG1134-PA	Unknown
LOC513129							2.2										LOC513129	XM_590767	CR452929	KIAA1217	Unknown
LOC518469							2.9										LOC518469	XM_001788896	AW462554	Hypothetical protein KIAA1434	Glycerol metabolism
LOC520387			1.9														LOC520387	BC148077	CN434232	KIAA0528	Transport
TMEM175									-1.9								LOC531240	XM_001788245	CN436182	Transcribed locus	Unknown functions
LOC533602			2.3						-1.9								LOC533602	BC153261	AW461430	CXYorf1-related protein
LOC535967										1.7							LOC535967	XR_028142	CK960558	Transcribed locus	Unknown
WSB2																	LOC537649	XM_617825	CR453840	cDNA	Unknown
LOC538046							-2.1										LOC538046	XR_028103	BF440161	cDNA	Unknown
LOC539467									-1.9								LOC539467	XR_042800	CR452903	Hypothetical protein BC007901	Unknown functions
LOC782721	-1.8																LOC613274	XM_863865	BF041041	Chromosome 10 open reading frame 32
LOC617808							2										LOC617808	XM_870130	CV798848	KIAA0355	Unknown
LOC618791			-2.5			-1.8											LOC618791	BC140467	AW462162	Hypothetical protein MGC12972	Unknown
LOC782274			2.5			2.3	2.1										LOC784541	XM_001787175	CK394111	Transcribed locus	Unknown
RPS16											1.6						LOC786607	XR_042722	CR455700	cDNA	Unknown
LOX			2.8														LOX		BF041163	Lysyl oxidase (LOX)	Protein modification; transmembrane receptor protein tyrosine kinase signaling pathway
LPPR2						-2											LPPR2		BM032276	Lipid phosphate phosphatase-related protein type 2 (LPPR2)	Brain development and neuronal excitation (putative)
LRIG3			3.6														LRIG3	XM_583040	BF039398	LEUCINE-RICH REPEATS- AND IMMUNOGLOBULIN-LIKE DOMAINS-CONTAINING PROTEIN 3; LRIG3	Unknown
LRP8							2.7										LRP8		DR697650	Low density lipoprotein receptor-related protein 8, apolipoprotein e receptor (LRP8)	Proteolysis; lipid metabolism; cytokine and chemokine mediated signaling pathway
LOC540105			2														LRRC20	BC147923	CR454594	Transcribed locus	Unknown
LOC514154						-2											LRRC8C	BC142315	BF044174	Transcribed locus	Unknown
LRRK1									-2.2								LRRK1		DV920148	Leucine-rich repeat kinase 1	Unknown functions
LRRN4CL									-2.4								LRRN4CL	BC104601	BC104601	Similar to hypothetical protein	Unknown functions
LINGO1		-2.1															LRRNGA		AU232888	Leucine rich repeat neuronal 6A (LRRNGA)	Unknown
LSM3			2.7														LSM3		CR455506	LSM3 homolog, U6 small nuclear RNA associated (LSM3)	Nuclear mRNA splicing
LSM6			2														LSM6		BF046429	LSM6 homolog, U6 small nuclear RNA associated (LSM6)	Nuclear mRNA splicing
LTB4R							2.5										LTB4R		CB432832	Leukotriene B4 receptor (LTB4R)	Cell motility; muscle contraction; inflammatory response; G-protein signaling, coupled to IP3 second messenger (phospholipase C ... <Preview truncated at 128 characters>
LUM							-2.2										LUM		CN436729	Lumican (LUM)	Visual perception; collagen fibril organization
LY6D			2.4														LY6D		CR455997	Lymphocyte antigen 6 complex, locus D (LY6D)	Cell adhesion
LZTR1			2														LZTR1		BF044883	Leucine-zipper-like transcription regulator 1 (LZTR1)	Morphogenesis
LZTS2							1.9										LZTS2		AU233257	Leucine zipper, putative tumor suppressor 2 (LZTS2)	Negative regulation of progression through cell cycle
MAF							-3.3										MAF		CV798817	v-maf musculoaponeurotic fibrosarcoma oncogene homolog (avian) (MAF)	Transcription regulation
MAFG							3.4										MAFG		BF042486	v-maf musculoaponeurotic fibrosarcoma oncogene homolog G (avian) (MAFG)	Transcription regulation
MAFK									-2.4								MAFK	XM_871229	CR852457	V-MAF AVIAN MUSCULOAPONEUROTIC FIBROSARCOMA ONCOGENE FAMILY, PROTEIN K; MAFK
MAML2							2.2										MAML2		BF039310	Mastermind-like 2 (MAML2)	Transcription regulation; Notch signaling pathway
MAP1B		-1.9															MAP1B	XM_863836	CN438689	MICROTUBULE-ASSOCIATED PROTEIN 1B; MAP1B
INPP5A			2.3														MAP1LC3B	BC102891	BM363737	Transcribed locus	Unknown
MAP2							2.4										MAP2		CN438100	Microtubule-associated protein 2 (MAP2)	Negative regulation of microtubule depolymerization
MAP2K7									-4.6								MAP2K7		CR452170	Mitogen-activated protein kinase kinase 7
LOC509109							2.7										MAP4K4		CR453978	Mitogen-activated protein kinase kinase kinase kinase 4 (MAP4K4)	Response to stress; protein kinase cascade
MAPK4																	MAPK4		CR452267	Mitogen-activated protein kinase 4	Protein amino acid phosphorylation; cell cycle
MAPKAPK3			1.9														MAPKAPK3		BF045054	Mitogen-activated protein kinase-activated protein kinase 3 (MAPKAPK3)	Response to stress; signal transduction
MAPT									-1.8								MAPT		M26157	Microtubule-associated protein tau	Cytoskeletal and Microtubule-based functions
MARCKS						2.4	3.7										MARCKS		CN433335	Myristoylated alanine-rich protein kinase C substrate (MARCKS)	Cell motility
MARCKSL1						2.2	2.8										MARCKSL1		CN439003	MARCKS-like 1 (MARCKSL1)	May be involved in coupling the PKC and calmodulin signal transduction systems
ENOPH1			-2.6														MASA	ENOPH1	CN434650	E-1 enzyme (MASA) (ENOPH1)	Metabolism
MAX									-2.3								MAX		BF042337	MYC associated factor X	Transcription regulation
MBNL2									-1.9								MBNL2		DT835017	Muscleblind-like 2	Unknown functions
MBP	1.9																MBP		CR551098	Myelin basic protein (MBP)	Immune response; nerve ensheathment
MCL1						2.1	2.1										MCL1		CN438032	Myeloid cell leukemia sequence 1 (BCL2-related) (MCL1)	Cell fate determination; regulation of apoptosis; cell homeostasis; cell differentiation
MCOLN1									-2.8								MCOLN1		DR749441	Mucolipin 1	Transport
MDM2									-1.9								MDM2		BF045166	Mdm2, transformed 3T3 cell double minute 2, p53 binding protein
MGAT4B							-1.8										MGAT4B		CR452014	Mannosyl (alpha-1,3-)-glycoprotein beta-1,4-N-acetylglucosaminyltransferase, isozyme B (MGAT4B)	Carbohydrate metabolism
MGAT5B			-2.8														MGAT5B		AW484574	Mannosyl (alpha-1,6-)-glycoprotein beta-1,6-N-acetyl-glucosaminyltransferase, isozyme B (MGAT5B)	Protein modification
MGC137255							2.5										MGC137255	BC112590	CN436289	cDNA	Unknown
MGC159911			2.2														MGC159911	BC147917	BF041346	FLJ12716 protein	Unknown
BOLA			-4.5			-3.2											MHC class I antigen A-11		AB008612	Similar to HLA class I histocompatibility antigen, A-11 alpha chain precursor (MHC class I antigen A-11)	Antigen presentation
BOLA-NC1			-2.6														MHC class I antigen A-11		CN999995	Similar to HLA class I histocompatibility antigen, A-11 alpha chain precursor (MHC class I antigen A-11)	Immune response; antigen presentation
BOLA			-3.4														MHC class I antigen A-11		CK831818	Similar to HLA class I histocompatibility antigen, A-11 alpha chain precursor (MHC class I antigen A-11)	Immune response; antigen presentation
MIA			-3.4														MIA		DR749213	Melanoma inhibitory activity (MIA)	Cell proliferation
MIB1	-1.7																MIB1		CR453736	Mindbomb homolog 1 (MIB1)	Ubiquitin cycle; Notch signaling pathway
MIDN							2.6										MIDN		CN433845	Midnolin (MIDN)	Protein modification
MIF						-2.4											MIF		CR452765	Macrophage migration inhibitory factor (glycosylation-inhibiting factor) (MIF)	Prostaglandin biosynthesis; inflammatory response; cell surface receptor linked signal transduction; cell proliferation; regulat... <Preview truncated at 128 characters>
MKRN2			3.1						-3.4								MKRN2		BF040653	Makorin, ring finger protein, 2 (MKRN2)	Unknown
MLLT1			2.3														MLLT1		CN440753	Myeloid/lymphoid or mixed-lineage leukemia (trithorax homolog, Drosophila); translocated to, 1 (MLLT1)	Transcription regulation
MLLT11			3.7														MLLT11		CN435725	Myeloid/lymphoid or mixed-lineage leukemia (trithorax homolog, Drosophila); translocated to, 11 (MLLT11)	Unknown
LOC526104			-4			-1.8	-2.9										MNAT1		BF039401	Similar to menage a trois 1 (MNAT1)	Cell cycle control
MORF4L2	-1.6																MORF4L2		CN441064	Mortality factor 4 like 2 (MORF4L2)	Regulation of cell growth; transcription regulation
MPEG1					4												MPEG1	BC105415	BM363755	MACROPHAGE EXPRESSED GENE 1
LOC512659			2														MPP7		AY563880	Membrane protein, palmitoylated 7 (MAGUK p55 subfamily member 7) (MPP7)	Signal transduction
MRGPRF			2						-1.5								MRGPRF		BM362982	Similar to Mas-related G-protein coupled receptor member F (Mas-related gene F protein) (MRGPRF)	Signal transduction
MRPL22							-1.8										MRPL22		CR454184	Mitochondrial ribosomal protein L22 (MRPL22)	Protein biosynthesis
MRPL28			-3.4														MRPL28		BM361943	Mitochondrial ribosomal protein L28 (MRPL28)	Protein biosynthesis
MRPL3			-2.1														MRPL3		CR454222	Mitochondrial ribosomal protein L3 (MRPL3)	Protein biosynthesis
MRPL32			2.1				1.9										MRPL32		AW462792	Mitochondrial ribosomal protein L32 (MRPL32)	Protein biosynthesis
MRPL48			2.8														MRPL48		BF039118	Mitochondrial ribosomal protein L48 (MRPL48)	Protein biosynthesis
MRPS14			-1.9														MRPS14	BC108164	CR454891	Mitochondrial ribosomal protein S14 9MRPS14)	Protein biosynthesis
MRPS34			-2.7														MRPS34		CN438192	Mitochondrial ribosomal protein S34 (MRPS34)	Protein biosynthesis
MRPS6			1.9														MRPS6		BF041055	Mitochondrial ribosomal protein S6 (MRPS6)	Protein biosynthesis
MKL1			-1.7														MRTF-A		AW461580	Similar to MKL/myocardin-like protein 1 (Myocardin-related transcription factor A) (MRTF-A) (Megakaryoblastic leukemia 1 protein... <Preview truncated at 128 characters>	Transcription regulation
MTF2			-2.8														MTF2		CR455869	Metal response element binding transcription factor 2 (MTF2)	Transcription regulation
MTHFD1L			3.6				1.8										MTHFD1L		BF041860	Methylenetetrahydrofolate dehydrogenase (NADP+ dependent) 1-like (MTHFD1L)	Folic acid and derivative biosynthesis
MTHFD2					2.6	2.7	1.8										MTHFD2		BF046156	Methylenetetrahydrofolate dehydrogenase (NADP+ dependent) 2, methenyltetrahydrofolate cyclohydrolase (MTHFD2)	One-carbon compound metabolism; folic acid and derivative biosynthesis; tetrahydrofolate metabolism
MTSS1	-1.8						-2.7										MTSS1		BF042126	Metastasis suppressor 1 (MTSS1)	Cell adhesion and motility; cell cycle regulation; development
MUC13									-5.2								MUC13		DV818268	Mucin 13, cell surface associated
MX1					1.7	2.4	2										MX1		AW464030	Myxovirus (influenza virus) resistance 1, interferon-inducible protein p78 (MX1)	Induction of apoptosis; immune response; signal transduction
MX2						3.4											MX2		CV798806	Myxovirus (influenza virus) resistance 2 (MX2)	Immune response
MXD4			-2.9														MXD4		BF040980	MAX dimerization protein 4 (MXD4)	Negative regulation of transcription; negative regulation of cell proliferation
MYADM			1.7														MYADM		CR454578	Myeloid-associated differentiation marker (MYADM)	Myeloid cell differentiation
MYB							-2.4										MYB		NM_175050	v-myb myeloblastosis viral oncogene homolog (avian) (MYB)	Transcription regulation
LOC520988			-5.1														MYBPC2		AW464619	Myosin binding protein C, fast type (MYBPC2)	Striated muscle contraction; cell adhesion
MYL3																	MYL3		CR553912	Myosin, light polypeptide 3, alkali; ventricular, skeletal, slow
MYO1C	1.8																MYO1C		NM_174396	Myosin IC (MYO1C)	Motor activity
LOC789249	-1.7																MYOM2		CN433241	Similar to microtubule-associated proteins 1A/1B light chain 3 (MYOM2)	Muscle contraction
MYST1			2.6														MYST1		BF041316	MYST histone acetyltransferase 1 (MYST1)	Chromatin assembly or disassembly; transcription regulation
MYST2									-1.6								MYST2		CR455659	MYST histone acetyltransferase 2	Transcription regulation
MYST4			2.1														MYST4		BM363704	MYST histone acetyltransferase (monocytic leukemia) 4 (MYST4)	Nucleosome assembly; transcription regulation; chromatin modification; histone acetylation
NAALADL2							2.4										NAALADL2	XM_001249381	BF042149	N-ACETYLATED ALPHA-LINKED ACIDIC DIPEPTIDASE-LIKE 2
NAB1			3														NAB1		AW462250	NGFI-A binding protein 1 (EGR1 binding protein 1) (NAB1)	Transcription regulation
NAPRT1			-2.5														NAPRT1		BF041781	Nicotinate phosphoribosyltransferase domain containing 1 (NAPRT1)	Pyridine nucleotide biosynthesis
NAV2			3.5														NAV2		CR551195	Neuron navigator 2 (NAV2)	Transport
NCBP2			1.9														NCBP2		CN435180	Nuclear cap binding protein subunit 2, 20kDa (NCBP2)	mRNA processing and export from nucleus; snRNA export from nucleus
LOC786541			1.8														NDFIP2		BF440542	Nedd4 family interacting protein 2 (NDFIP2)	Positive regulation of I-kappaB kinase/NF-kappaB cascade
NDUFAB1			2.4														NDUFAB1		BF039771	NADH dehydrogenase (ubiquinone) 1, alpha/beta subcomplex, 1, 8kDa (NDUFAB1)	Mitochondrial electron transport
NDUFB6			2.6														NDUFB6		CN436515	NADH dehydrogenase (ubiquinone) 1 beta subcomplex, 6, 17kDa (NDUFB6)	Mitochondrial electron transport
LOC788878			2														NDUFS6		CR452468	NADH dehydrogenase (ubiquinone) Fe-S protein 6, 13kDa (NADH-coenzyme Q reductase) (NDUFS6)	Mitochondrial electron transport
NDUFS7					-1.9												NDUFS7)		CR552975	NADH dehydrogenase (ubiquinone) Fe-S protein 7, 20kDa (NADH-coenzyme Q reductase) (NDUFS7)	Mitochondrial electron transport
NFATC3			1.7														NFATC3		BF040066	Nuclear factor of activated T-cells, cytoplasmic, calcineurin-dependent 3 (NFATC3)	Transcription regulation; inflammatory response
NFKBIA																	NFKBIA		BF440215	Nuclear factor of kappa light polypeptide gene enhancer in B-cells inhibitor, alpha (NFKBIA)	Apoptosis; cytoplasmic sequestering of NF-kappaB; response to pathogenic bacteria
NFKBIA		2				3.3	3.5										NFKBIA		BF440215	Nuclear factor of kappa light polypeptide gene enhancer in B-cells inhibitor, alpha (NFKBIA) (I-KappaB alpha)	Apoptosis; cytoplasmic sequestering of NF-kappaB; response to pathogenic bacteria
NGRN											-1.6						NGRN		BC113206	Neugrin, neurite outgrowth associated	Neuron differentiation
NHP2L1			1.9														NHP2L1		BF040901	NHP2 non-histone chromosome protein 2-like 1 (NHP2L1)	Regulation of progression through cell cycle; nuclear mRNA splicing; ribosome biogenesis and assembly
GAR1							1.8										NOLA1		CR453878	Similar to nucleolar protein family A, member 1, transcript variant 2 (NOLA1)	RNA processing
NP						2.1	3.4										NP		DR697447	Nucleoside phosphorylase (NP)	Nucleic acid metabolism; DNA modification
MRPS25									-1.8								NR2C2		BF044040	Nuclear receptor subfamily 2, group C, member 2	Cell growth, differentiation, and development
NSUN5			-2.7														NSUN5		BF042364	NOL1/NOP2/Sun domain family, member 5 (NSUN5)	Cell proliferation (by relation)
NUDC									-2.3								NUDC		DN642086	Nuclear distribution gene C homolog	Cell growth, differentiation, and development
SEC61A2			1.7														NUDT5		CR453292	Nudix (nucleoside diphosphate linked moiety X)-type motif 5 (NUDT5)	Nucleotide metabolism; D-ribose catabolism
NUMA1	1.7		2.5														NUMA1		CR451991	Nuclear mitotic apparatus protein 1 (NUMA1)	Mitosis; nuclear organization and biogenesis
NUP188			-2.9														NUP188		AW266945	Nucleoporin 188kDa (NUP188)	Nuclear-cytoplasmic transport
NUP205							-1.7										NUP205		CR553856	Nucleoporin 205kDa (NUP205)	Protein import into nucleus, docking
NXN							2.4										NXN		BM363408	Similar to nucleoredoxin (NXN)	Electron transport
OAS1					2.5	2.3	2.8										OAS1		DR749237	2,5-oligoadenylate synthetase 1, 40/46kDa (OAS1)	Immune response; resistance to virus infection, control of cell growth, differentiation, and apoptosis
OAT						-4	-3.9										OAT		BF046362	Ornithine aminotransferase (gyrate atrophy)(OAT)	Amino acid metabolism; ornithine metabolism; visual perception
DR749446			3														ODC	U36394	DR749446	Ornithine decarboxylase
OFD1	-1.9								-4.2								OFD1		CR451853	Oral-facial-digital syndrome 1 (OFD1)	Unknown
OGN						-3.1	-4.2										OGN		CR553502	Osteoglycin (osteoinductive factor, mimecan) (OGN)	Cell growth
LOC782542									-2.7								ONECUT2	XM_001251175	CN441702	Similar to one cut domain, family member 3	Transcription regulation
OSBPL1A									-1.6								OSBPL1A		BM364239	Oxysterol binding protein-like 1A	Metabolism and energy production
OSTF1							2										OSTF1		AW463947	Osteoclast stimulating factor 1 (OSTF1)	Ossification; signal transduction
OTUD5							5								1.5		OTUD5		BF041642	OTU domain containing 5 (OTUD5)	Unknown
OTUD5														1.8			OTUD5	XM_585195	DN519095	OTU DOMAIN-CONTAINING PROTEIN 5; OTUD5	Unknown
P8																	P8		DT857329	p8 protein \(candidate of metastasis 1)
PA2G4			1.9						-1.8								PA2G4		AW463412	Proliferation-associated 2G4, 38kDa (PA2G4)	Proteolysis; cell cycle arrest; cell proliferation; negative regulation of transcription
MGC159584			-1.8														PACAP		BM362799	Proapoptotic caspase adaptor protein (PACAP)	Apoptosis
PAFAH1B3			2.9														PAFAH1B3		CR553886	Platelet-activating factor acetylhydrolase, isoform Ib, gamma subunit 29kDa(PAFAH1B3)	Nervous system development; lipid catabolism
DR749367					2.6												PALM2-AKAP2		DR749367	PALM2-AKAP2 protein (PALM2-AKAP2)	Unknown
PARD3															2		PARD3		DV868922	Par-3 partitioning defective 3 homolog	Protein complex assembly; cell cycle; establishment and/or maintenance of cell polarity; protein kinase C activation; axonogenes... <Preview truncated at 128 characters>
PAX8			-2.3														PAX8		BI847359	Paired box gene 8 (PAX8)	GTP, UTP, and CTP biosynthesis; transcription regulation; morphogenesis; cell differentiation
PB1			1.8														PB1		CR452476	Polybromo 1 (PB1)	Transcription regulation; chromatin modification
PCGF2	2.1																PCGF2		CN434167	Polycomb group ring finger 2 (PCGF2)	Transcription regulation
PCID2				-1.7		-1.9											PCID2		AW464810	PCI domain containing 2 (PCID2)	Unknown
PCNA							-1.9										PCNA		CR551324	Proliferating cell nuclear antigen (PCNA)	Regulation of progression through cell cycle; regulation of DNA replication; DNA repair; phosphoinositide-mediated signaling
PCP4			4.6														PCP4		CR452751	Purkinje cell protein 4 (PCP4)	Central nervous system development
LOC539655							2.3										PCTK2		CR451837	PCTAIRE protein kinase 2 (PCTK2)	Regulation of progression through cell cycle; protein amino acid phosphorylation
PDCD5			2.4														PDCD5		CN434930	Programmed cell death 5 (PDCD5)	Apoptosis
PDCD7			2.4														PDCD7		AW464391	Programmed cell death 7 (PDCD7)	Apoptosis
PDGFB																	PDGFB		CN435473	Platelet-derived growth factor beta polypeptide \(simian sarcoma viral \(v-sis) oncogene homolog)
PDIA4			-2.2														PDIA4		CR454689	Protein disulfide isomerase family A, member 4 (PDIA4)	Electron transport; protein secretion
PDPN					4.1	4	5.6								2.6		PDPN		DR749212	Podoplanin (PDPN)	Putative differentiation antigen, influenza-virus receptor, and marker of lung injury; mucin-like acitvities
PBP			2.4														PEBP1		AW461715	Phosphatidylethanolamine binding protein 1 (PEBP1)	Protease inhibition
PEG3			2.6														PEG3		AW461515	Paternally expressed gene 3 (PEG3)	Transcription regulation
FAM63B							-2.5										PFDN2	BC126786	CN442143	cDNA	Unknown
PFDN2									-4.8								PFDN2		CK769368	Prefoldin subunit 2
PFDN4							-2.2		-2.4								PFDN4		BF044280	Prefoldin subunit 4 (PFDN4)	Chaperonin-mediated tubulin folding; protein folding
PFDN6							2.3										PFDN6		AW464404	Prefoldin subunit 6 (PFDN6)	Protein folding
PFKFB3						2.7	4.7								1.7		PFKFB3		DR749445	6-phosphofructo-2-kinase/fructose-2,6-biphosphatase 3 (PFKFB3)	Metabolism
PGK1			-1.7			-1.7	1.7										PGK1		BF040480	Phosphoglycerate kinase 1 (PGK1)	Glycolysis
PHB2							2.6										PHB2		AF093739	Prohibitin 2 (PHB2)	Transcription regulation
PHF12			2.6						-2.1								PHF12		BI681052	PHD finger protein 12 (PHF12)	Negative regulation of transcription
LOC510504						-1.8											PHF21A		CN433825	PHD finger protein 21A (PHF21A)	Transcription regulation
PHGDH			2.5	1.6													PHGDH		CR455498	Phosphoglycerate dehydrogenase (PHGDH)	L-serine biosynthesis; transport; brain development
PHLDA1					5.1												PHLDA1		AW461932	Pleckstrin homology-like domain, family A, member 1 (PHLDA1)	Apoptosis
PHLDA1			4.9	4.2	5.1	7.7	5.3										PHLDA1	TDAG51	AW461932	Pleckstrin homology-like domain, family A, member 1 (PHLDA1) (TDAG51)	Apoptosis
PHLDA2							2.6										PHLDA2		AW466053	Pleckstrin homology-like domain, family A, member 2 (PHLDA2)	Cell growth regulation; apoptosis
PHLPP									-1.6								PHLPP		DV910785	PH domain and leucine rich repeat protein phosphatase	Stress response and cell death
PHPT1															2.1		PHPT1		BC108196	Phosphohistidine phosphatase 1	Dephosphorylation; signal transduction
PHYH			-2.5	-2.2													PHYH		BF040744	Phytanoyl-CoA 2-hydroxylase (PHYH)	Lipid metabolism; nervous system development; sensory, visual, and sound perception
PIGR		1.9			-2.3												PIGR		NM_174143	Polymeric immunoglobulin receptor (PIGR)	Transcellular transport of polymeric immunoglobulin molecules
PIGS				1.8													PIGS		CN434386	Phosphatidylinositol glycan, class S (PIGS)	Attachment of GPI anchor to protein
PIP4K2A									-1.7								PIP5K2A		BF044627	Phosphatidylinositol-4-phosphate 5-kinase, type II, alpha	Metabolism and energy production
PLAC8						2	2.5										PLAC8		BF040284	Placenta-specific 8 (PLAC8)	Unknown
PLAC8						3.8	5.7										PLAC8		CN439555	Placenta-specific 8 (PLAC8)	Unknown
PLAT			3.5	2.5		2.3	2.6										PLAT		AW464360	Plasminogen activator, tissue (PLAT)	Protein modification; proteolysis; blood coagulation
PLAU					3.2	5.6	7.8								2.3		PLAU		BF039457	Plasminogen activator, urokinase (PLAU)	Proteolysis chemotaxis; signal transduction; blood coagulation; fibrinolysis
PLK1				1.8													PLK1		CR456136	Polo-like kinase 1 (PLK1)	Cell cycle regulation
PLP2							2.6										PLP2		BF039237	Proteolipid protein 2 (colonic epithelium-enriched) (PLP2)	Ion transport; chemotaxis; cytokine and chemokine mediated signaling pathway
PLXNA3	1.8																PLXNA3		AW464650	Plexin A3 (PLXNA3)	Development of neural and epithelial tissues
PMM2									-1.6								PMM2		CN439424	Phosphomannomutase 2	Protein biosynthesis, processing, and catabolism
PNPT1							2.7										PNPT1		AW465370	Polyribonucleotide nucleotidyltransferase 1 (PNPT1)	RNA processing; mRNA catabolism
PODXL2									-1.9								PODXL2		CO893361	Podocalyxin-like 2
POFUT2			2.3														POFUT2		DR697476	Protein O-fucosyltransferase 2 (POFUT2)	Protein modification
POLD1							-2.3										POLD1		NM_174427	Polymerase (DNA directed), delta 1, catalytic subunit 125kDa (POLD1)	DNA replication; DNA repair; response to UV
POLR1D			2.1														POLR1D		CR454537	Polymerase (RNA) I polypeptide D, 16kDa (POLR1D)	Transcription
POLR1E	-2.4																POLR1E		CR454679	Polymerase (RNA) I polypeptide E, 53kDa (POLR1E)	Transcription
POLR3A							1.8										POLR3A)		AW461453	Polymerase (RNA) III (DNA directed) polypeptide A, 155kDa (POLR3A)	Transcription
POLR3K			2														POLR3K		CN433708	Polymerase (RNA) III (DNA directed) polypeptide K, 12.3 kDa (POLR3K)	Transcription
POLRMT									-1.8								POLRMT		BF041988	Polymerase \(RNA) mitochondrial \(DNA directed)	Transcription regulation
POP5									-1.7								POP5		DT844748	Processing of precursor 5, ribonuclease P/MRP subunit	RNA processing
PPA1						2.9	2.8										PP		CN441261	Pyrophosphatase (inorganic) 1 (PP)	Phosphate metabolism
MGC129042			2.3														PPP1CB		AW266973	Protein phosphatase 1, catalytic subunit, beta isoform (PPP1CB)	Carbohydrate metabolism; glycogen metabolism; cell cycle; cell division
PPP1CC									-1.8								PPP1CC		AJ429235	Protein phosphatase 1, catalytic subunit, gamma isoform	Cell growth, differentiation, and development
PPP1R16A			-3.5			-2.4	-2.7										PPP1R16A		BF045030	Protein phosphatase 1, regulatory (inhibitor) subunit 16A (PPP1R16A)	Unknown
SRGN						3.5	5.6								2		PRG1		AW465275	Proteoglycan 1, secretory granule (PRG1)	May neutralize hydrolytic enzymes
PRICKLE1			3.3														PRICKLE1		CN440338	Prickle-like 1 (PRICKLE1)	Tissue polarity (by relation)
PRKAB2							-2.4										PRKAB2		CB165806	Protein kinase, AMP-activated, beta 2 non-catalytic subunit (PRKAB2)	Fatty acid biosynthesis; signal transduction
PRKAB2					-1.9	-2.2	-2										PRKAB2		BM363715	Protein kinase, AMP-activated, beta 2 non-catalytic subunit (PRKAB2)	Fatty acid biosynthesis; signal transduction
PRKACB			1.8														PRKACB		CV798801	Protein kinase, cAMP-dependent, catalytic, beta (PRKACB)	Signal transduction
PRKAR1B																	PRKAR1B		DV884845	Protein kinase, cAMP-dependent, regulatory, type I, beta	Protein amino acid phosphorylation; signal transduction
PRKAR2B							-2.2										PRKAR2B		NM_174649	Protein kinase, cAMP-dependent, regulatory, type II, beta (PRKAR2B	Protein amino acid phosphorylation; signal transduction
PRKCI			2.4														PRKCI		CN442312	Protein kinase C, iota (PRKCI)	Protein targeting to membrane; cytoskeleton organization and biogenesis; intracellular signaling cascade; establishment and/or m... <Preview truncated at 128 characters>
PRPF4			3.8														PRPF4		CN438137	PRP4 pre-mRNA processing factor 4 homolog (PRPF4)	Nuclear mRNA splicing
PSD									-2.2								PSD		CN442101	Pleckstrin and Sec7 domain containing	Signal transduction
PSMA5	-2.7																PSMA5		CN434535	Proteasome (prosome, macropain) subunit, alpha type, 5 (PSMA5)	Ubiquitin-dependent protein catabolism
PSMB1						-1.7											PSMB1		CR552780	Proteasome (prosome, macropain) subunit, beta type, 1 (PSMB1)	Ubiquitin-dependent protein catabolism
PSMC3			-2														PSMC3		CN437375	Proteasome (prosome, macropain) 26S subunit, ATPase, 3 (PSMC3)	Protein catabolism
PSMC5			-3.6	-1.7													PSMC5		CR455154	Proteasome (prosome, macropain) 26S subunit, ATPase, 5 (PSMC5)	Protein catabolism
PSMC5																	PSMC5*		CR455154	Proteasome (prosome, macropain) 26S subunit, ATPase, 5 (PSMC5)*	Protein catabolism
PSMF1									-2.1								PSMF1		BC104535	Proteasome \(prosome, macropain) inhibitor subunit 1 \(PI31)	Protein biosynthesis, processing, and catabolism
PSPC1																	PSPC1		BF039699	Paraspeckle component 1	DNA repair
PSPH						2	3.2										PSPH		BF043883	Phosphoserine phosphatase (PSPH)	L-serine biosynthesis; metabolism
PTER							-1.9										PTER		CN433788	Phosphotriesterase related (PTER)	Catabolism
PTGDS			2.3														PTGDS		CN439736	Prostaglandin D2 synthase 21kDa (brain) (PTGDS)	Prostaglandin biosynthesis; transport; regulation of circadian sleep/wake cycle
FADK							1.8										PTK2		BF045318	PTK2 protein tyrosine kinase 2 (PTK2)	Protein amino acid phosphorylation; integrin-mediated signaling pathway
PTK7			2.8														PTK7		CN436834	PTK7 protein tyrosine kinase 7 (PTK7)	Cell adhesion; signal transduction
PTPN11																	PTPN11		BF045313	Protein tyrosine phosphatase, non-receptor type 11 \(Noonan syndrome 1)	Protein amino acid dephosphorylation; intracellular signaling cascade; sensory perception of sound
PTPRC															-2		PTPRC		CO888567	Protein tyrosine phosphatase, receptor type, C	Negative regulation of T cell mediated cytotoxicity;negative regulation of cytokine and chemokine mediated signaling pathway;neg... <Preview truncated at 128 characters>
PUS1							1.9										PUS1		BF044673	Pseudouridylate synthase 1 (PUS1)	tRNA processing
PYCRL			-2.9														PYCRL		CR454264	Pyrroline-5-carboxylate reductase-like (PYCRL)	Electron transport; proline biosynthesis
KHDRBS1			2.4														PYGM	BC151314	AW465635	GLYCOGEN PHOSPHORYLASE, MUSCLE; PYGM
LOC514618							-3										RACGAP1		CN433296	Rac GTPase activating protein 1 (RACGAP1)	Small GTPase mediated signal transduction
RAD21			-2.3			-2.1											RAD21		CN436040	RAD21 homolog (RAD21)	Double-strand break repair; apoptosis; chromosome organization and biogenesis; cell cycle; chromosome segregation; mitosis; meio... <Preview truncated at 128 characters>
RAD51AP1			2														RAD51AP1		CN436535	RAD51 associated protein 1 (RAD51AP1)	Double-strand break repair via homologous recombination; DNA repair
RFTN1			2.2														RAFTLIN		DR697497	Raft-linking protein (RAFTLIN)	Unknown
RALBP1									-1.9								RALBP1		DV882642	RalA binding protein 1	Cell growth, differentiation, and development
RANBP1			-2	-2.2													RANBP1		AW462220	RAN binding protein 1 (RANBP1)	Signal transduction; intracellular transport
RAP1A			2.1														RAP1A		DR697686	RAP1A, member of RAS oncogene family (RAP1A)	Small GTPase-mediated signal transduction; negative regulation of progression through cell cycle
RAP2B							2.8										RAP2B		CN439416	RAP2B, member of RAS oncogene family (RAP2B)	Small GTPase mediated signal transduction
LOC522707			-2.7			-2.1											RAP2C		CR453771	Similar to RAP2C, member of RAS oncogene family (RAP2C)	Small GTPase mediated signal transduction
RARA							2.4										RARA		BM256373	Retinoic acid receptor, alpha (RARA)	Transcription regulation; signal transduction
LOC614497	1.9		2														RASA4	XM_869189	U83066	#NAME?	Unknown
RBBP7	-2.5																RBBP7		AW464984	Retinoblastoma binding protein 7 (RBBP7)	Development; cell proliferation
ELMOD3			2.4														RBED1		CR454354	RNA binding motif and ELMO domain 1 (RBED1)	Phagocytosis; apoptosis
RBP4							2.7										RBP4		CN435843	Retinol binding protein 4, plasma (RBP4)	Transport; sensory perception; visual perception
RCP9																	RCP9		DN514721	Transcribed locus, similar to calcitonin gene-related peptide-receptor component protein	Acrosome reaction
RECQL5									-1.6								RECQL5		CN437059	RecQ protein-like 5	Stress response and cell death
DDIT4																	REDD1		BM366955	DNA-damage-inducible transcript 4 \(DDIT4)	Stress response
REEP4			2.2														REEP4		CR553790	Receptor accessory protein 4 (REEP4)	May enhance the cell surface expression of odorant receptors
REPIN1			2.3														REPIN1		CR454398	Replication initiator 1 (REPIN1)	DNA replication
RFX5		1.7	-2.1														RFX5		BM362040	Regulatory factor X, 5 (RFX5)	Transcription regulation; influences HLA class II expression
RGL2			2.4														RGL2		CR453885	Ral guanine nucleotide dissociation stimulator-like 2 (RGL2)	Small GTPase-mediated signal transduction; Ras protein signal transduction
RGS2						3.2	3.3										RGS2		BM362277	Regulator of G-protein signalling 2, 24kDa (RGS2)	Cell cycle; regulation of signal transduction
RHOA									-1.9								RHOA		NM_176645	Ras homolog gene family, member A	Cytoskeletal and Microtubule-based functions
RHOH															-2.3		RHOH		AW289213	Ras homolog gene family, member H	Small GTPase mediated signal transduction; T cell differentiation; negative regulation of I-kappaB kinase/NF-kappaB cascade; tra... <Preview truncated at 128 characters>
RHOU															1.9		RHOU		CR454408	Ras homolog gene family, member U	Small GTPase-mediated signal transduction; activation of PAK1 and JNK1; induction of filopodium formation and stress fiber disso... <Preview truncated at 128 characters>
RHPN2							2.8										RHPN2		BF042073	Rhophilin, Rho GTPase binding protein 2 (RHPN2)	Signal transduction
RILPL1			4				2.3										RILPL1	BC118379	BM362989	hypothetical protein FLJ39378	Unknown
TMEM158							6.7								1.8		RIS1		CN437627	Ras-induced senescence 1 (RIS1)	Senescence
C1H3ORF38															-1.6		RLF		BF045540	Similar to Zinc finger protein Rlf \(Rearranged L-myc fusion gene protein) \(Zn-15 related protein)	May be involved in transcriptional regulation
RNF149			2				2.6										RNF149		BF044113	Ring finger protein 149 (RNF149)	Proteolysis
RNF19A			2														RNF19		CR453307	Ring finger protein 19 (RNF19)	Microtubule cytoskeleton organization and biogenesis; ubiquitin cycle
RNF214		-1.8	2.4														RNF214	XM_868212	BF045073	Hypothetical protein DKFZp547C195	Unknown
RNF31			2.5														RNF31		BM365273	Ring finger protein 31 (RNF31)	Unknown
RBM39			-2.1														RNPC2		BF040025	RNA-binding region (RNP1, RRM) containing 2 (RNPC2)	Nuclear mRNA splicing; transcription regulation
RNPEPL1															2		RNPEPL1		CO886453	Arginyl aminopeptidase \(aminopeptidase B)-like 1	Proteolysis
ROCK2			2.2						-1.7								ROCK2		BF046300	Rho-associated, coiled-coil containing protein kinase 2 (ROCK2)	Cytokinesis; muscle contraction; intracellular signaling cascade
RPS20			2.5														RPGR		BM361838	Retinitis pigmentosa GTPase regulator (RPGR)	Intracellular protein transport; sensory perception of sound; visual perception
RPL12															-1.6		RPL12		CN436788	Ribosomal protein L12	Protein biosynthesis
RPL18A			-3.1														RPL18A		CR452147	Similar to ribosomal protein L18a; 60S ribosomal protein L18a (RPL18A)	Protein biosyntehsis
RPL21			-2.4														RPL21		CR455267	Ribosomal protein L21 (RPL21)	Protein biosynthesis
RPL22L1			-1.9														RPL21L1		CR550814	Similar to ribosomal protein L22 like 1 (RPL21L1)	Protein biosyntehsis
RPL27			1.8														RPL27		CR453490	Ribosomal protein L27 (RPL27)	Protein biosynthesis
RPL5			-3.2														RPL5		CR452490	Ribosomal protein L5 (RPL5)	Protein biosynthesis
RPS15A									-2								RPS15A		CN434793	Ribosomal protein S15a	Protein biosynthesis, processing, and catabolism
RPS18	-1.6																RPS18		AW462524	Ribosomal protein S18 (RPS18)	Protein biosynthesis
RRP12			2.5														RRP12	XM_607428	BM362899	KIAA0690	Unknown
RRP12														1.7			RRP12	XM_607428	DV793580	Transcribed locus	Unknown
RWDD1			2														RWDD1		BF042283	RWD domain containing 1 (RWDD1)	Unknown
RWDD1							2.8										RWDD1	BC102910	CN437147	Transcribed locus	Unknown
LOC100141073			2.1														RY1		CR452029	Putative nucleic acid binding protein RY-1 (RY1)	Unknown
S100A1			1.9														S100A1		CR456152	S100 calcium binding protein A1 (S100A1)	Intracellular signaling cascade; development; regulation of heart contraction
S100A11							3.8										S100A11		CR453487	S100 calcium binding protein A11 (calgizzarin) (S100A11)	Signal transduction; negative regulation of DNA replication; negative regulation of cell proliferation
S100A14							2.2										S100A14		AW465094	S100 calcium binding protein A14 (S100A14)	Signal transduction
S100A2			4.1			4	14.9				2				6.4		S100A2		BF043546	S100 calcium binding protein A2 (S100A2)	Unknown
SAFB			-1.9														SAFB		AW463379	Scaffold attachment factor B (SAFB)	Establishment and/or maintenance of chromatin architecture; transcription regulation
SAMHD1					2.5	2.3	3.3										SAMHD1		BM365025	SAM domain and HD domain 1 (SAMHD1)	Immune response; signal transduction
SAP30BP			-2.7														SAP30BP		CN437010	SAP30 binding protein (SAP30BP)	Unknown
LOC510764																	SAPS2		AW462437	SAPS domain family, member 2
SAR1B			2.1														SAR1B		CK775887	SAR1 gene homolog B (SAR1B)	ER to Golgi vesicle-mediated transport; small GTPase mediated signal transduction
SAT1							2.4										SAT		BF043097	Spermidine/spermine N1-acetyltransferase (SAT)	Polyamine metabolism
SATB1							2.5										SATB1		CR552398	Special AT-rich sequence binding protein 1 (binds to nuclear matrix/scaffold-associating DNAs) (SATB1)	Establishment and/or maintenance of chromatin architecture; transcription regulation
SCARB2						-2.3	-2.5										SCARB2		AW462095	Scavenger receptor class B, member 2 (SCARB2)	Cell adhesion
SCRN1			3.6														SCRN1		BF040336	Secernin 1 (SCRN1)	Proteolysis; exocytosis
SEC61G							1.8										SEC61G		CN442111	Sec61 gamma subunit (SEC61G)	Protein targeting
SEMA3C			1.8														SEMA3C		CN441521	Sema domain, immunoglobulin domain (Ig), short basic domain, secreted, (semaphorin) 3C (SEMA3C)	immune response; transmembrane receptor protein tyrosine kinase signaling pathway; development; response to drug
SEPHS2			1.8														SEPHS2	NM_001114732	CR451801	Selenophosphate synthetase 2 9SEPHHS2)	Selenocysteine biosynthesis
CCDC152			-2.2			-3.8	-5.3								-2.5		SEPP1		CN435807	Selenoprotein P, plasma, 1 (SEPP1)	Response to oxidative stress
LOC781002			2.2														SERINC1		CR454540	Serine incorporator 1 (SERINC1)	Phosphatidylserine metabolism; sphingolipid metabolism; L-serine transport; positive regulation of transferase activity
SERPING1															-1.8		SERPING1		CR553820	Serpin peptidase inhibitor, clade G \(C1 inhibitor), member 1, \(angioedema, hereditary)	Complement activation, classical pathway; blood coagulation; circulation; innate immune response
SF3B3									-1.8								SF3B3		DN540614	Splicing factor 3b, subunit 3, 130kDa	RNA processing
SF3B4																	SF3B4		CK978935	Splicing factor 3b, subunit 4, 49kDa	Nuclear mRNA splicing
SFRS10			1.9														SFRS10		CN432940	Splicing factor, arginine/serine-rich 10 (transformer 2 homolog, Drosophila) (SFRS10)	nuclear mRNA splicing
SGTA																	SGTA		CN437922	Small glutamine-rich tetratricopeptide repeat \(TPR)-containing, alpha
SH3PXD2A			3.4														SH3PXD2A		DR697668	SH3 and PX domains 2A (SH3PXD2A)	Intracellular signaling cascade
SHF			2.1														SHB		BF046034	Src homology 2 domain containing adaptor protein B (SHB)	intracellular signaling cascade
SI							-4.9								-1.7		SI		BM431211	Sucrase-isomaltase (alpha-glucosidase) (SI)	Carbohydrate metabolism
PUF60			1.9														SIAHBP1		BF044305	Fuse-binding protein-interacting repressor (SIAHBP1)	Transcription regulation
ST3GAL1										1.6							SIAT4A		BF039097	Sialyltransferase 4A \(beta-galactosidase alpha-2,3-sialytransferase)
LOC508259			2.4														SIDT1		AY563829	SID1 transmembrane family, member 1 (SIDT1)	Unknown
SIKE1			2.6														SIKE		CR553356	Suppressor of IKK epsilon (SIKE)	Signal transduction
LOC520505			-3.4														SIN3B		BF044910	SIN3 homolog B, transcription regulator (SIN3B)	Transcription regulation
SLC13A2							-3										SLC13A2		CK945641	Solute carrier family 13 (sodium-dependent dicarboxylate transporter), member 2 (SLC13A2)	Sodium ion transport
SLC15A3			1.9														SLC15A3		AW336922	Solute carrier family 15, member 3 (SLC15A3)	Oligopeptide transport
SLC16A1			-2.2														SLC16A1		TC229836	Solute carrier family 16 (monocarboxylic acid transporters), member 1 (SLC16A1)	Organic anion transport; mevalonate transport
SLC17A7							2										SLC17A7		AW465294	Solute carrier family 17 (sodium-dependent inorganic phosphate cotransporter), member 7 (SLC17A7)	Sodium-dependent phosphate transport
SLC1A3						-2.5											SLC1A3		CR453582	Solute carrier family 1 (glial high affinity glutamate transporter), member 3 (SLC1A3)	Neurotransmitter uptake; dicarboxylic acid transport; synaptic transmission; L-glutamate transport
LOC511232			-2.6			-2.1											SLC25A23		CK776076	Solute carrier family 25 (mitochondrial carrier; phosphate carrier), member 23 (SLC25A23)	transport
SLC25A38			2.3														SLC25A38	BC148053	BF044284	SOLUTE CARRIER FAMILY 25, MEMBER 38; SLC25A38	Unknown
SLC26A6			-3.1														SLC26A6		CR452513	Solute carrier family 26, member 6 (SLC26A6)	Sulfate transport; homophilic cell adhesion; neuropeptide signaling pathway
SLC29A3									-1.9								SLC29A3		BF043384	Solute carrier family 29 \(nucleoside transporters), member 3	Transport
SLC2A1						3.1	6.2								1.6		SLC2A1		CN441490	Solute carrier family 2 (facilitated glucose transporter), member 1 (SLC2A1)	Glucose transport
SLC31A1						-3	-3.5										SLC31A1	BC150143	CR454688	cDNA (similar to high-affinity copper uptake protein)	Copper ion transport
SLC35A2									-1.7								SLC35A2		BC112444	Solute carrier family 35 \(UDP-galactose transporter), member A2	Metabolism and energy production
SLC35B3			1.9														SLC35B3		CB165864	Solute carrier family 35, member B3 (SLC35B3)	Sugar transport (probable)
SLC38A2							1.9										SLC38A2		CN433928	Solute carrier family 38, member 2 (SLC38A2)	Oxygen and amino acid transport
SLC39A13			-3.2														SLC39A13		BE810055	Solute carrier family 39 (zinc transporter), member 13 (SLC39A13)	Metal ion transport
SLC39A7			2.9														SLC39A7		BF041712	Solute carrier family 39 (zinc transporter), member 7 (SLC39A7)	Metal ion transport
SLC43A2						-1.8											SLC43A2		CN439110	Solute carrier family 43, member 2 (SLC43A2)	Unknown
MRPS6			-2.1														SLC5A3		TC230217	Solute carrier family 5 (inositol transporters), member 3 (SLC5A3)	Sodium ion transport
SLC6A8			-3														SLC6A8		NM_174611	Solute carrier family 6 (neurotransmitter transporter, creatine), member 8 (SLC6A8)	Neurotransmitter uptake; sodium ion transport; muscle contraction
SLC7A5			2.2														SLC7A5		CN439552	Solute carrier family 7 (cationic amino acid transporter, y+ system), member 5 (SLC7A5)	Amino acid transport
SLC7A7						-1.8	-2.4										SLC7A7		AW463705	Solute carrier family 7 (cationic amino acid transporter, y+ system), member 7 (SLC7A7)	Protein complex assembly; amino acid metabolism and transport
SLCO4A1														2.5			SLCO4A1		CK773160	Transcribed locus, similar to solute carrier organic anion transporter family, member 4A1	Ion transport
SMAD6	1.9		2.6														SMAD6		BF040034	SMAD, mothers against DPP homolog 6 (SMAD6)	TGF-beta receptor antagonist
JARID1C																	SMCX		CN441671	Smcy homolog, X-linked	Transcription regulation
SMURF1									-2								SMURF1		CK776037	SMAD specific E3 ubiquitin protein ligase 1	Cell growth, differentiation, and development
SMYD4			2.3														SMYD4		BM363240	SET and MYND domain containing 4 (SMYD4)	Unknown
SNRPG		2.1															SNRPG		CN435437	Small nuclear ribonucleoprotein polypeptide G (SNRPG)	Spliceosome assembly; RNA splicing
SNX10			1.8			1.9	2.8										SNX10		AW463500	Sorting nexin 10 (SNX10)	Intracellular signaling; protein transport
SNX5			2.1														SNX5		BF041745	Sorting nexin 5 (SNX5)	Intracellular signaling cascade; protein transport
SOD2					3.9	7.6	10.4								3.6		SOD2		NM_201527	Superoxide dismutase 2, mitochondrial (SOD2)	Response to oxidative stress; transcription regulation; superoxide metabolism; cellular defense response
SORBS2			3.5														SORBS2		CN437677	Sorbin and SH3 domain containing 2 (SORBS2)	Transport
SOX6															1.9		SOX6		CF615271	SRY \(sex determining region Y)-box 6	Establishment and/or maintenance of chromatin architecture; transcription regulation of transcription; muscle development
LOC530104			2.7			2	3										SPAG1		BF041310	Sperm associated antigen 1 (SPAG1)	Rregulation of GTP signal transduction pathways; spermatogenesis; fertilization
SPCS3			2.7														SPCS3		CR451631	Signal peptidase complex subunit 3 homolog (SPCS3)	Signal peptide processing
SPIRE2							1.8										SPIRE2		DR749451	Spire homolog 2 (SPIRE2)	Unknown
SPSB3							2.2										SPSB3		BF039066	SplA/ryanodine receptor domain and SOCS box containing 3 (SPSB3)	Intracellular signaling cascade
SRC			-1.9														SRC		BF039800	v-src sarcoma (Schmidt-Ruppin A-2) viral oncogene homolog (SRC)	Protein amino acid phosphorylation; signal complex formation; protein kinase cascade
SRXN1							2.2										SRXN1		CN434539	Sulfiredoxin 1 homolog (SRXN1)	Response to ocidative stress
SS18L2									-1.7								SS18L2		DV848254	Synovial sarcoma translocation gene on chromosome 18-like 2	Unknown functions
SSBP1			-2.1														SSBP1		BF044515	Single-stranded DNA binding protein 1 (SSBP1)	DNA replication
DR749329							2.5										SSH1		DR749329	Slingshot homolog 1 (SSH1)	Plays a role in actin dynamics by reactivating ADF/cofilin proteins
SSRP1			-2.3														SSRP1		CR451784	Structure specific recognition protein 1 (SSRP1)	Transcription regulation
ST3GAL5			2.3														ST3GAL5		BM364120	ST3 beta-galactoside alpha-2,3-sialyltransferase 5 (ST3GAL5)	Ganglioside biosynthesis; carbohydrate metabolism; protein amino acid glycosylation
LOC613578																	STAC	BC126707	CN438921	SRC HOMOLOGY 3 AND CYSTEINE-RICH DOMAIN; STAC
STAT1	-1.6					2.3	2.5										STAT1		BF043726	Signal transducer and activator of transcription 1 (STAT1)	Regulation of immune response
STAT1						2.1											STAT1		BF042916	Signal transducer and activator of transcription 1, 91kDa (STAT1)	Regulation of progression through cell cycle; caspase activation; I-kappaB kinase/NF-kappaB cascade; response to virus
STAT3						2											STAT3		BP110564	Signal transducer and activator of transcription 3 (acute-phase response factor) (STAT3)	Negative regulation of transcription; cell motility; acute-phase response; JAK-STAT cascade; nervous system development; cytokin... <Preview truncated at 128 characters>
STC1							4.4								1.5		STC1		AW465510	Stanniocalcin 1 (STC1)	Calcium ion homeostasis; cell surface receptor linked signal transduction; cell-cell signaling; response to nutrient
STK17B							-2.1										STK17B		BF043121	Serine/threonine kinase 17b (apoptosis-inducing) (STK17B)	Protein amino acid phosphorylation; apoptosis; protein kinase cascade
STK24															1.6		STK24		DV924388	Serine/threonine kinase 24 \(STE20 homolog, yeast)	Protein amino acid phosphorylation;signal transduction
STXBP3			1.8														STXBP3		BF440176	Syntaxin binding protein 3 (STXBP3)	Vesicle docking during exocytosis; protein transport
STXBP5L			-2														STXBP5L	XM_616879	CN433000	SYNTAXIN-BINDING PROTEIN 5-LIKE; STXBP5L	Unknown
SUMO1	-1.6																SUMO		CN440951	SMT3 suppressor of mif two 3 homolog 1 (SUMO)	Protein modification; ubiquitin cycle; negative regulation of transcription
SUPT4H1							2.1										SUPT4H1		AW289220	Suppressor of Ty 4 homolog 1 (SUPT4H1)	Positive regulation of transcription
SUZ12									-1.6								SUZ12	XM_582605	DV922621	SUPPRESSOR OF ZESTE 12, DROSOPHILA, HOMOLOG OF; SUZ12
TACSTD1						2	2.6										TACSTD1		BF040754	Tumor-associated calcium signal transducer 1 (TACSTD1)	Cell adhesion; regulation of cell growth
TAF2			-1.9														TAF2		AW267131	TAF2 RNA polymerase II, TATA box binding protein (TBP)-associated factor, 150kDa (TAF2)	Transcription initiation; proteolysis
TAGLN3			3.1														TAGLN3		CN436951	Transgelin 3 (TAGLN3)	Central nervous system development; muscle development
TARSL1	1.9																TARSL1	BT030672	BF046297	cDNA	Unknown
TBC1D13																	TBC1D13		CN437756	TBC1 domain family, member 13	Signal transduction
TBC1D4							4.2										TBC1D4		DR749437	TBC1 domain family, member 4 (TBC1D4)	May act as a gtpase activating protein for rab family proteins
TBC1D7				1.7													TBC1D7		CR454178	TBC1 domain family, member 7 (TBC1D7)	GTPase activation
TBC1D8							-2										TBC1D8		BF043720	TBC1 domain family, member 8 (with GRAM domain) (TBC1D8)	Circulation; positive regulation of cell proliferation
TBX2																	TBX2		CN438161	T-box 2	Transcription regulation; development
TBX3						1.8											TBX3		BF039487	T-box 3 (ulnar mammary syndrome) (TBX3)	Skeletal development; transcription regulation; morphogenesis
LOC618437			-2.2														TEAD3	XM_591149	CN436618	TEA DOMAIN FAMILY MEMBER 3; TEAD3	Unknown
TEGT							-2.4										TEGT		AW465347	Testis enhanced gene transcript (BAX inhibitor 1) (TEGT)	Negative regulation of apoptosis
TENC1									-2.3								TENC1		CN435230	Tensin like C1 domain containing phosphatase \(tensin 2)	Cell adhesion and migration
TF						-3.2											TF		CR455643	Transferrin (TF)	Iron ion transport; iron homeostasis
TFDP2						-2.6	-2.5										TFDP2		BF039311	Transcription factor Dp-2 (E2F dimerization partner 2) (TFDP2)	Regulation of progression through cell cycle; DNA metabolism; transcription regulation
TFPI2							4.9								1.8		TFPI2		NM_182788	Tissue factor pathway inhibitor 2 (TFPI2)	Blood coagulation
TGDS			2.1														TGDS	BC148106	CR453708	Similar to dTDP-D-glucose 4,6-dehydratase	Nucleotide metabolism
TGIF2									-1.6								TGIF2		DV893455	TGFB-induced factor 2 \(TALE family homeobox)	Transcription regulation
THBS1						6.3	14								5		THBS1		CR454665	Thrombospondin 1 (THBS1)	Cell adhesion and motility; development; blood coagulation
TIFA					2.1												TIFA		BI540470	TRAF-interacting protein with a forkhead-associated domain (TIFA)	Signaling; IKK activation
TIMP1					2.3	5	7.4										TIMP1		BF045724	TIMP metallopeptidase inhibitor 1 (TIMP1)	Development; positive regulation of cell proliferation; erythrocyte maturation; negative regulation of membrane protein ectodoma... <Preview truncated at 128 characters>
TINAGL1			-3.3														TINAGL1		AW463460	Tubulointerstitial nephritis antigen-like 1 (TINAGL1)	Proteolysis; endosome transport
TLN2				-1.7													TLN2		BF041839	Talin 2 (TLN2)	Intercellular junction assembly; cell adhesion
TLR4						3.9	5.7								1.7		TLR4		NM_174198	Toll-like receptor 4 (TLR4)	Activation of NF-kappaB-inducing kinase; detection of pathogenic bacteria and fungi; immune cell activation
TM9SF1			2.1														TM9SF1		CR551591	Transmembrane 9 superfamily member 1 (TM9SF1)	Transport
TMCO1			1.8						-1.5								TMCO1		BM363592	Transmembrane and coiled-coil domains 1 (TMCO1)	Unknown
TMEM104			-3.6														TMEM104		CN441403	Transmembrane protein 104 (TMEM104)	Amino acid transport
TMEM106C							-2.2										TMEM106C		BF044707	Transmembrane protein 106C (TMEM106C)	Unknown
TMEM128	-1.7																TMEM128		BF044451	Transmembrane protein 128 (TMEM128)	Unknown
TMEM28									-1.6								TMEM28		CK776053	Transmembrane protein 28	Unknown functions
TMEM49				1.7		2.6	2.7										Tmem49		CR551429	Transmembrane protein 49 (Tmem49)	Unknown
TMEM51			1.8														TMEM51		BF043036	Transmembrane protein 51 (TMEM51)	Unknown
TMEM63B									-1.8								TMEM63B		CR552538	Transmembrane protein 63B	Unknown functions
LOC536628							3.3										TMEM87B	XM_870320	DR697635	Transcribed locus	Unknown
TMPO									-2								TMPO		DY139452	Thymopoietin	Cell growth, differentiation, and development
TMPRSS4						-1.9											TMPRSS4		AW465181	Transmembrane protease, serine 4 (TMPRSS4)	Proteolysis
TNCRNA			-2.3				2.1										TncRNA		BM363176	Trophoblast-derived noncoding RNA (TncRNA)	Regulation of gene expression; silencing of mRNA
TNFAIP3									-2								TNFAIP3		AM024103	Tumor necrosis factor, alpha-induced protein 3	Stress response and cell death
TNFAIP6						4.6	6.6										TNFAIP6		AW461501	Tumor necrosis factor, alpha-induced protein 6 (TNFAIP6)	Inflammatory response; cell adhesion; signal transduction
TNFAIP8									-1.5								TNFAIP8		CR553925	Tumor necrosis factor, alpha-induced protein 8	Stress response and cell death
TNFRSF18																	TNFRSF18		CB453430	Tumor necrosis factor receptor superfamily, member 18	Anti-apoptosis; signal transduction
TNIK																	TNIK		CR453574	TRAF2 and NCK interacting kinase (TNIK)	JNK cascade; response to stress
TNIK				-1.9			3.9										TNIK		AW462683	TRAF2 and NCK interacting kinase (TNIK)	Regulation of translation; response to stress; JNK signaling cascade
LOC783548							2.7										TNKS1BP1		AW461846	Tankyrase 1 binding protein 1, 182kDa (TNKS1BP1)	Telomerase-dependent telomere maintenance
TNP2									-2.1								TNP2		NM_174200	Transition protein 2 \(during histone to protamine replacement)	Cell growth, differentiation, and development
LOC535277							2.6										TPM4		AW461504	Tropomyosin 4 (TPM4)	Muscle development and contraction
TPR			2.2														TPR		CN433001	Translocated promoter region (to activated MET oncogene) (TPR)	Protein import into nucleus
TTC3			1.9														TPR repeat protein D		BF042688	Similar to Tetratricopeptide repeat protein 3 (TPR repeat protein 3) (TPR repeat protein D)	Unknown
TRAF2			3.3						-1.7								TRAF2	XM_869007	AW462640	TNF RECEPTOR-ASSOCIATED FACTOR 2; TRAF2	Unknown
TRAF3IP3									-11.1								TRAF3IP3		BM362074	TRAF3 interacting protein 3
TRAFD1			1.7														TRAFD1		CN437685	TRAF-type zinc finger domain containing 1 (TRAFD1)	Negative feedback regulator of TLR signaling
LOC785345			3.1														TRAPPC4		AW461503	Trafficking protein particle complex 4 (TRAPPC4)	ER to Golgi vesicle-mediated transport; dendrite morphogenesis; neurotransmitter receptor biosynthesis
TRERF1		-2.2															TRERF1		BM366880	Transcriptional regulating factor 1 (TRERF1)	Steroid biosynthesis; development; transcription regulation
HSA9761			2														TRGV5-1	AY644518	CN442348	Dimethyladenosine transferase	rRNA modification and processing
TRIM25							2.5										TRIM25		BF040073	Tripartite motif-containing 25 (TRIM25)	Protein ubiquitination
TRIM47									-2.4								TRIM47	XM_870970	DV918465	Tripartite motif-containing 47	Unknown functions
TRIM5															-3		TRIM5		DN823421	Tripartite motif-containing 5	Ubiquitin cycle
TRMT1			-3.7														TRMT1		BF043207	TRM1 tRNA methyltransferase 1 homolog (TRMT1)	tRNA processing
TROAP			2.1						-1.6								TROAP		BF440548	Trophinin associated protein (tastin) (TROAP)	Cell adhesion
TSC22D1	-2																TSC22D1		BF043277	TSC22 domain family, member 1 (TSC22D1)	Transcription regulation
TSPAN13							1.9										TSPAN13		DR697642	Tetraspanin 13 (TSPAN13)	Signal transduction; regulation of cell development, activation, growth and motility
TSPAN15									-2.2								TSPAN15		CN653930	Similar to tetraspanin 15	Cell growth, differentiation, and development
TSPAN31									-1.7								TSPAN31		CR452519	Tetraspanin 31	Cell growth, differentiation, and development
LOC615687			1.7														TXNDC10		CN441117	Thioredoxin domain containing 10 (TXNDC10)	Electron transport
TXNDC9			2.9														TXNDC9		BF039655	Thioredoxin domain containing 9 (TXNDC9)	Electron transport
TXNRD1							2.8										TXNRD1		BM362012	Thioredoxin reductase 1 (TXNRD1)	Electron transport; thioredoxin pathway; cell proliferation
LOC789546			-1.8				-1.9										U2AF2		CR455529	U2 small nuclear RNA auxiliary factor 2 (U2AF2)	Nuclear mRNA splicing via spliceosome
U5-102 kDa protein									-2.5								U5-102 kDa protein		BC105318	Similar to U5 snRNP-associated 102 kDa protein	RNA processing
UAP1							2										UAP1		CN437412	UDP-N-acteylglucosamine pyrophosphorylase 1 (UAP1)	UDP-N-acetylglucosamine biosynthesis; metabolism
UBAP1					1.7		2.3										UBAP1		CR552058	Ubiquitin associated protein 1 (UBAP1)	Protein catabolism (putative)
UBAP2L			1.7						-1.8								UBAP2L		CN438798	Ubiquitin associated protein 2-like (UBAP2L)	Unknown
UCP1			-2.4	-1.8		-1.7											UCP1		X14064	Uncoupling protein 1 (mitochondrial, proton carrier) (UCP1)	Generation of precursor metabolites and energy
UGCG							2										UGCG		CN435714	UDP-glucose ceramide glucosyltransferase (UGCG)	Glucosylceramide biosynthesis; epidermis development
UNC119									-1.5								UNC119		BC103449	Unc-119 homolog	Signal transduction
UNC50									-1.9								UNC50		CB463491	Unc-50 homolog
UQCRH				1.8			-1.8										UQCRH		BM363367	Ubiquinol-cytochrome c reductase hinge protein (UQCRH)	Electron transport; oxidative phosphorylation; aerobic respiration
URM1			-2.2														URM1	XM_001249350	CR553920	UBIQUITIN-RELATED MODIFIER 1, S. CEREVISIAE, HOMOLOG OF; URM1	Unknown
USP12						-2											USP12		CK776819	Ubiquitin specific peptidase 12 (USP12)	Ubiquitin-dependent protein catabolism
USP13						2.1											USP13		CN438282	Ubiquitin specific peptidase 13 (isopeptidase T-3) (USP13)	Ubiquitin-dependent protein catabolism
LOC507307			1.7														USP9X		AW464985	Ubiquitin specific peptidase 9, X-linked (USP9X)	Ubiquitin-dependent protein catabolism; female gamete generation
VCL							2.4										VCL		CR454464	Vinculin (VCL)	Cell adhesion and motility; lamellipodium biogenesis; negative regulation of cell migration; apical junction assembly
VEGFB			-2.1														VEGFB		CN434072	Vascular endothelial growth factor B (VEGFB)	Regulation of progression through cell cycle; regulation of cell growth; signal transduction; positive regulation of cell prolif... <Preview truncated at 128 characters>
VISA						-2.2											VISA		BF042052	Virus-induced signaling adapter (VISA)	Response to virus; positive regulation of I-kappaB kinase/NF-kappaB cascade; innate immune response
VPS11							2.1										VPS11		CN440693	Vacuolar protein sorting 11 (VPS11)	Protein transport
LOC534322			1.9														WAPAL		AW466185	Wings apart-like homolog (WAPAL)	Unknown
WARS						6	5.5										WARS		CN438008	Tryptophanyl-tRNA synthetase (WARS)	Protein biosynthesis; negative regulation of cell proliferation
WDFY2			2.6														WDFY2		BM366193	WD repeat and FYVE domain containing 2 (WDFY2)	Unknown
WDR1			-2.3														WDR1		CN442255	WD repeat domain 1 (WDR1)	Sensory perception of sound
WDR6			1.9			-1.8											WDR6		CR456032	WD repeat domain 6 (WDR6)	Unknown
WDR6																	WDR6		CN440867	WD repeat domain 6 (WDR6)	Unknown
WDR77			1.8														WDR77		BE757574	WD repeat domain 77 (WDR77)	Unknown
WDR82P1							2										WDR82		AW465505	WD repeat domain 82 (WDR82)	Unknown
WHSC2						-2.1											WHSC2		CR454809	Wolf-Hirschhorn syndrome candidate 2 (WHSC2)	Transcription regulation; development
WNT7A																	WNT7A		CR551218	Wingless-type MMTV integration site family, member 7A	Frizzled-2 signaling pathway; cell-cell signaling; development; sex differentiation; morphogenesis
WSB2							1.8										WSB2		CN442158	WD repeat and SOCS box-containing 2 (WSB2)	Intracellular signaling cascade
WTIP			2.1														WTIP		CN440762	Wilms tumor 1 interacting protein (WTIP)	Regulation of cell growth and differentiation
LOC520730									-1.6								WWC1		AW462873	WW, C2 and coiled-coil domain containing 1
LOC788943					2.1												XBP1		BF039767	X-box binding protein 1 (XBP1)	Transcription regulation; immune response
XRCC1			-3.2			-2.2											XRCC1		DR697420	X-ray repair complementing defective repair in Chinese hamster cells 1 (XRCC1)	Single strand break repair
YPEL3									-3.7								YPEL3		BM363645	Yippee-like 3
YWHAZ							2.1										YWHAZ		BF042854	Tyrosine 3-monooxygenase/tryptophan 5-monooxygenase activation protein, zeta polypeptide (YWHAZ)	Regulation of signal transduction; regulatiion of insulin sensitivity (putative)
ZAK							1.8										ZAK		CN439313	Sterile alpha motif and leucine zipper containing kinase AZK (ZAK)	Cell cycle checkpoint; DNA damage checkpoint; activation of MAPKK activity; response to stress; cell cycle arrest; activation of... <Preview truncated at 128 characters>
ZBED4			2.1														ZBED4		CF766982	Zinc finger, BED-type containing 4 (ZBED4)	Unknown
UNK				1.6													ZC3H5		BF046467	Zinc finger CCCH-type containing 5 (ZC3H5)	Unknown
ZCCHC17			3.4														ZCCHC17		DR697663	Zinc finger, CCHC domain containing 17 (ZCCHC17)	Unknown
ZDHHC18			2														ZDHHC18		AW464906	Zinc finger, DHHC-type containing 18 (ZDHHC18)	Unknown
ZDHHC6					1.9												ZDHHC6		BF041321	Zinc finger, DHHC-type containing 6 (ZDHHC6)	Unknown
ZFP1			1.9														ZFP1		CR455118	Zinc finger protein 1 homolog (ZFP1)	Transcription regulation
ZFPL1			2.5														ZFPL1		CN442028	Zinc finger protein-like 1 (ZFPL1)	Transcription regulation
ZFYVE26			-1.9														ZFYVE26		CN434744	Zinc finger, FYVE domain containing 26 (ZFYVE26)	Unknown
ZKSCAN1			2.1														ZKSCAN1		BF039448	Zinc finger with KRAB and SCAN domains 1 (ZKSCAN1)	Transcription regulation
ZNF277	1.7		2.5														ZNF277		CR552443	Zinc finger protein 277 (ZNF277)	Transcription regulation
MGC157324			2														ZNF322A		BF039827	Zinc finger protein 322A (ZNF322A)	Transcription regulation
ZNF335									-2.9								ZNF335		DN526668	Zinc finger protein 335	Transcription regulation
LOC100140121			-3.6														ZNF367		CR455086	Zinc finger protein 367 (ZNF367)	Protein amino acid dephosphorylation; cell division
ZNF446			2.2														ZNF446	XM_867938	BF043453	FLJ45850 protein	Transcription regulation
ZNF509			-3.6														ZNF509		CR550477	Zinc finger protein 509 (ZNF509)	Transcription regulation
LOC530973			-1.9														ZNF550		CR452212	Zinc finger protein 550 (ZNF550)	Transcription regulation
ZNF622				1.8													ZNF622		BM362570	Zinc finger protein 622 (ZNF622)	Unknown
GLI4						-2.3											ZNF71		CR455495	Zinc finger protein 71 (Cos26) (ZNF71)	Transcription regulation
UBR4			1.7														ZUBR1		AW462980	Zinc finger, UBR1 type 1 (ZUBR1)	Ubiquitin cycle
									-2.2									M21044	M21044	Similar to HLA class I histocompatibility antigen, A-11 alpha chain precursor (MHC class I antigen A-11)	Cell growth, differentiation, and development
LIMS2			2.6															AC087843	CR455873	Transcribed locus	Unknown
P15RS			2.3															AC091252	CN438785	Hypothetical protein FLJ10656	Unknown
RBBP6				2														AC092727	BM366773	cDNA	Unknown
			-1.8															AC149763	BM362246	cDNA	Unknown
			2.5															AC150516	CN438591	cDNA	Unknown
BPHL			-1.7															AC150593	DR749334	Transcribed locus	Unknown
			2															AC151132	CR451987	cDNA	Unknown
																		AC175271	DT859529	cDNA	Unknown
						-1.7												AC216759	CN432966	Transcribed locus	Unknown
NUDT18							-1.6		-1.5									AC217170	CR451778	Transcribed locus	Unknown
NEK7			3.2															AC232942	DR697573	Transcribed locus	Unknown
SDC4					2.6		3.2											AF285100	AW464191	cDNA	Unknown
							-1.9											AY56380	BF041612	cDNA	Unknown
DAGLB			-1.9															AY563869	BF043897	Transcribed locus	Unknown
USP4							1.9											AY563877	BF044170	Transcribed locus	Unknown
															-2.4			AY563887	AY563887	cDNA	Unknown
LOC523424			2.3															AY563898	AY563898	cDNA	Unknown
																		BC103303	BC103303	Hypothetical protein PRO1580	Unknown
LOC507402				3.5		2.5	2.2											BC149213	BF041953	Transcribed locus	Unknown
							2.1											BC149354	DR697613	Transcribed locus	Unknown
																		DQ888310	CR456056	Transcribed locus	Unknown
	3.3																	EF034082	CN440514	-	Unknown
LOC100196897			1.7						-1.8									FJ357702	CK394182	Transcribed locus	Unknown
									-1.7									BC118108	DV920966	Transcribed locus	Unknown functions
LOC786644									-2.1									BC151615	BF043445	Transcribed locus	Unknown functions
LOC615412									-3.6									AC217149	BF043242	cDNA
