# Supplementary material for: Role of SPI-1 Secreted Effectors in Acute Bovine Response to Salmonella enterica Serovar Typhimurium: A Systems Biology Analysis Approach
Source: PLoS One. 2011 Nov 11;6(11):e26869. doi: 10.1371/journal.pone.0026869 (PMC3214023; doi:10.1371/journal.pone.0026869)
Supplement: Table S5 — Detailed gene list for Table 4 Summary of significantly altered genes that overlap between the two statistical methods ( Table 2 and 3 ). Genes with significant z-score changes and significant p value and 1.5-fold-change in response to infection with wild type Salmonella Typhimurium or an isogenic ΔsipA, sopABDE2 mutant. UI = Uninfected control loops inoculated with Luria-Bertani broth. WT = Wild type inoculated loop versus uninfected control loops. For genes to be on this list, they had to be found significant based on both statistical analysis methods (t test and Bayesian statistical inference). (XLSX) [file pone.0026869.s005.xlsx]

## Sheet: Supporting Table S5
S5 Supporting Details for Table 3
			Bayesian Inference |Z-score| >= 1.96 and |Fold|>=1.5 Method								Bayesian Inference |Z-score| >= 1.96 and |Fold|>=1.5 Method
			Fold-Change for WT Condition vs UI (time in minutes)								Fold-Change MUT Condition vs UI (time in minutes)
Symbol	Oligo Number		15	30	60	120	240	480	720		15	30	60	120	240	480	720	Description	Accession	Molecular Function	Biological Process	Cellular Component
LOC652614	OLIGO_12363				-3.86	-1.86												similar to HLA class I histocompatibility antigen, A-11 alpha chain precursor (MHC class I antigen A*11)	AB008612	molecular_function;	antigen processing and presentation of peptide antigen via MHC class I;immune response;immune response;immune response;antigen p... <Preview truncated at 128 characters>	membrane;membrane;membrane;membrane;integral to membrane;MHC class I protein complex;MHC class I protein complex;MHC class I pro... <Preview truncated at 128 characters>
MYOD1	OLIGO_00003				-1.59													myogenic differentiation 1	AB110599	DNA binding;DNA binding;transcription factor activity;protein binding;transcription factor binding;transcription factor binding;... <Preview truncated at 128 characters>	regulation of alternative nuclear mRNA splicing, via spliceosome;regulation of alternative nuclear mRNA splicing, via spliceosom... <Preview truncated at 128 characters>	nucleus;nucleus;nucleus;nucleus;nucleus;transcription factor complex;transcription factor complex;nucleus;nucleus;nucleus;nucleu... <Preview truncated at 128 characters>
LOC668400	OLIGO_00029				-3.47			1.69											AJ512824
CR2	OLIGO_00030			1.61				1.8	1.75									complement component (3d/Epstein Barr virus) receptor 2	AJ535317	receptor activity;receptor activity;complement receptor activity;protein binding;	B cell activation;	external side of plasma membrane;
SERPINB8	OLIGO_12540								1.56									serpin peptidase inhibitor, clade B (ovalbumin), member 8	AJ671953	serine-type endopeptidase inhibitor activity;serine-type endopeptidase inhibitor activity;peptidase inhibitor activity;		cytoplasm;cytoplasm;
CD55	OLIGO_12686							1.73	2.35										AJ674170
F2R	OLIGO_12567				-1.99													coagulation factor II (thrombin) receptor	AJ693807	signal transducer activity;receptor activity;G-protein coupled receptor activity;G-protein coupled receptor activity;receptor bi... <Preview truncated at 128 characters>	connective tissue replacement during inflammatory response;activation of caspase activity;inflammatory response;signal transduct... <Preview truncated at 128 characters>	plasma membrane;plasma membrane;plasma membrane;caveola;membrane;integral to membrane;integral to membrane;integral to membrane;... <Preview truncated at 128 characters>
RAB3IP	OLIGO_12483								1.83									RAB3A interacting protein (rabin3)	AJ694668	protein binding;		nucleus;cytosol;
CREM	OLIGO_12504							2.51	3.77						1.63			cAMP responsive element modulator	AJ696239	DNA binding;DNA binding;transcription factor activity;transcription factor activity;transcription factor activity;protein bindin... <Preview truncated at 128 characters>	transcription;regulation of transcription, DNA-dependent;regulation of transcription, DNA-dependent;regulation of transcription,... <Preview truncated at 128 characters>	nucleus;nucleus;nucleus;
ST8SIA1	OLIGO_00036				1.51													ST8 alpha-N-acetyl-neuraminide alpha-2,8-sialyltransferase 1 (EC:2.4.99.8)	AJ699418	alpha-N-acetylneuraminate alpha-2,8-sialyltransferase activity;sialyltransferase activity;sialyltransferase activity;transferase... <Preview truncated at 128 characters>	protein amino acid glycosylation;protein amino acid glycosylation;lipid metabolic process;sphingolipid metabolic process;positiv... <Preview truncated at 128 characters>	Golgi membrane;Golgi apparatus;membrane;integral to membrane;integral to Golgi membrane;integral to Golgi membrane;
AACS	OLIGO_12516				1.72													acetoacetyl-CoA synthetase	AV606435	catalytic activity;calcium ion binding;GTPase activator activity;protein binding;acetoacetate-CoA ligase activity;catalytic acti... <Preview truncated at 128 characters>	metabolic process;apoptosis;anti-apoptosis;sensory perception of smell;metabolic process;lipid metabolic process;	cytoplasm;nuclear envelope;cytoplasm;intracellular membrane-bounded organelle;cellular_component;
BTD	OLIGO_12647						-1.68											biotinidase	AV607074	hydrolase activity;hydrolase activity, acting on carbon-nitrogen (but not peptide) bonds;hydrolase activity, acting on carbon-ni... <Preview truncated at 128 characters>	nitrogen compound metabolic process;	extracellular region;extracellular space;nucleolus;perikaryon;apical part of cell;
NAALADL1	OLIGO_12518				-1.64				-4.29		2.22		-1.54			-1.77		N-acetylated alpha-linked acidic dipeptidase-like 1	AV607093	peptidase activity;peptidase activity;	proteolysis;proteolysis;
ANAPC11	OLIGO_06880				1.9						-1.67		1.5					APC11 anaphase promoting complex subunit 11 homolog (yeast)	AW261162	protein binding;zinc ion binding;metal ion binding;	cell cycle;mitosis;cell division;protein K11-linked ubiquitination;	nucleus;nucleus;anaphase-promoting complex;cytoplasm;cytoplasm;
ACTB	OLIGO_10564				1.7				1.84									actin, beta	AW261194	nucleotide binding;structural constituent of cytoskeleton;protein binding;ATP binding;ATP binding;identical protein binding;	sarcomere organization;	soluble fraction;cytoplasm;cytosol;cytosol;cytoskeleton;cytoskeleton;actin cytoskeleton;cortical cytoskeleton;filamentous actin;... <Preview truncated at 128 characters>
ZNF192	OLIGO_11343				-3.1		1.6		-2.07										AW266852	nucleic acid binding;nucleic acid binding;transcription factor activity;zinc ion binding;zinc ion binding;metal ion binding;	transcription;regulation of transcription, DNA-dependent;regulation of transcription, DNA-dependent;regulation of transcription;	intracellular;intracellular;intracellular;nucleus;nucleus;nucleus;cytoplasm;
CD81	OLIGO_06532				-1.61													CD81 molecule	AW266934	molecular_function;	biological_process;	membrane;membrane;integral to membrane;integral to membrane;integral to membrane;integral to membrane;integral to membrane;integ... <Preview truncated at 128 characters>
NUP188	OLIGO_06533				-1.75														AW266945	protein binding;
PPP1CB	OLIGO_06858				1.92													protein phosphatase 1, catalytic subunit, beta isoform	AW266973
PLEKHC1	OLIGO_00074							1.54	1.74										AW266985	molecular_function;	biological_process;	stress fiber;filamentous actin;stress fiber;filamentous actin;cellular_component;
CTGF	OLIGO_06541								1.58		-1.74							connective tissue growth factor	AW267007	integrin binding;insulin-like growth factor binding;heparin binding;heparin binding;	cartilage condensation;ossification;angiogenesis;regulation of cell growth;DNA replication;cell adhesion;cell-matrix adhesion;in... <Preview truncated at 128 characters>	extracellular region;extracellular region;extracellular region;extracellular region;proteinaceous extracellular matrix;proteinac... <Preview truncated at 128 characters>
LOC508666	OLIGO_00087						1.57	2.77	2.47							1.65			AW267060	chemokine activity;	immune response;	extracellular region;
TAF2	OLIGO_00103				-1.63				-1.67										AW267131	protein binding;promoter binding;	G2/M transition of mitotic cell cycle;transcription initiation from RNA polymerase II promoter;positive regulation of gene-speci... <Preview truncated at 128 characters>	transcription factor TFIID complex;transcription factor TFTC complex;
LOC510165	OLIGO_00104				-1.9														AW267135	protein binding;protein binding;	organelle organization;dendrite morphogenesis;photoreceptor cell maintenance;calcium-dependent cell-cell adhesion;
RHOH	OLIGO_05155				-1.58		1.61		2.17		1.62		1.51		1.52			ras homolog gene family, member H	AW289213	nucleotide binding;protein binding;protein binding;GTP binding;GTP binding;GTP binding;GTP binding;GTP binding;kinase inhibitor ... <Preview truncated at 128 characters>	small GTPase mediated signal transduction;small GTPase mediated signal transduction;T cell differentiation;negative regulation o... <Preview truncated at 128 characters>	immunological synapse;intracellular;cytoplasm;cytoplasm;cytoplasm;cytoplasm;plasma membrane;plasma membrane;plasma membrane;memb... <Preview truncated at 128 characters>
SFRS3	OLIGO_05158				1.51													splicing factor, arginine/serine-rich 3	AW289216	nucleotide binding;nucleic acid binding;RNA binding;protein binding;	mRNA processing;RNA splicing;negative regulation of B cell proliferation;interleukin-2 biosynthetic process;	nucleus;nucleus;cytoplasm;
DNMT3A	OLIGO_05178				-2.51													RIKEN cDNA 4833432E10 gene	AW289242	DNA binding;DNA binding;DNA binding;DNA (cytosine-5-)-methyltransferase activity;methyltransferase activity;zinc ion binding;tra... <Preview truncated at 128 characters>	DNA methylation;DNA methylation;DNA methylation;negative regulation of transcription from RNA polymerase II promoter;DNA methyla... <Preview truncated at 128 characters>	euchromatin;nucleus;cytoplasm;nuclear matrix;chromosome, centromeric region;euchromatin;euchromatin;nucleus;nucleus;nucleus;nucl... <Preview truncated at 128 characters>
IER2	OLIGO_06914						1.58	1.89										immediate early response 2	AW289324			cytoplasm;
DAPP1	OLIGO_08876				-1.65			1.61										dual adaptor for phosphotyrosine and 3-phosphoinositides 1	AW289359	protein binding;
EMR1	OLIGO_12877						1.6	2.5	3.89									egf-like module containing, mucin-like, hormone receptor-like 1	AW312229
BLNK	OLIGO_12781			1.5	-2.37				-2.09									B-cell linker	AW445383	protein binding;protein binding;
EGFL7	OLIGO_12545		2.15				-1.53											EGF-like domain 7	AW445488	calcium ion binding;calcium ion binding;
HLA-DMA	OLIGO_13215						-1.93											major histocompatibility complex, class II, DM alpha	AW446507	protein binding;	antigen processing and presentation of peptide or polysaccharide antigen via MHC class II;protein complex assembly;immune respon... <Preview truncated at 128 characters>	intracellular;lysosomal membrane;multivesicular body;endosome membrane;membrane;MHC class II protein complex;MHC class II protei... <Preview truncated at 128 characters>
Tgm3	OLIGO_10154						1.65	3.15	5.09			-1.67		2.2	2.09	2.11		transglutaminase 3, E polypeptide	AW461432	magnesium ion binding;protein-glutamine gamma-glutamyltransferase activity;protein-glutamine gamma-glutamyltransferase activity;... <Preview truncated at 128 characters>	peptide cross-linking;peptide cross-linking;peptide cross-linking;peptide cross-linking;cell envelope organization;protein tetra... <Preview truncated at 128 characters>	cytoplasm;extrinsic to internal side of plasma membrane;
TNFAIP6	OLIGO_06437								2.51									tumor necrosis factor, alpha-induced protein 6	AW461501
TRAPPC4	OLIGO_03625				2.57		-1.82											trafficking protein particle complex 4	AW461503
TPM4	OLIGO_10636							2	2.33									tropomyosin 4	AW461504			podosome;cytoplasm;cortical cytoskeleton;filamentous actin;
PEG3	OLIGO_03626				1.78													paternally expressed 3	AW461515	nucleic acid binding;transcription factor activity;zinc ion binding;zinc ion binding;metal ion binding;	regulation of transcription, DNA-dependent;apoptosis;	intracellular;intracellular;nucleus;nucleus;nucleus;cytoplasm;cytoplasm;
CCNL1	OLIGO_08042							2.55	1.8						1.67			cyclin L1	AW461567	DNA binding;ATP binding;	DNA replication;	cellular_component;
CEBPB	OLIGO_11543							2.43	2.35					1.62	1.58	1.59		CCAAT/enhancer binding protein (C/EBP), beta	AW461572	DNA binding;transcription factor activity;transcription factor activity;RNA polymerase II transcription factor activity, enhance... <Preview truncated at 128 characters>	transcription;regulation of transcription, DNA-dependent;regulation of transcription, DNA-dependent;cell differentiation;regulat... <Preview truncated at 128 characters>	nucleus;nucleus;nucleus;
PDZK1	OLIGO_06017			1.57				-1.67	-2.24		1.7					-2.11		PDZ domain containing 1	AW461578	protein binding;protein C-terminus binding;PDZ domain binding;	carnitine transport;positive regulation of ion transmembrane transport;	nucleus;cytoplasm;cytoplasm;cytoplasm;mitochondrion;membrane;membrane;brush border membrane;
EMX2	OLIGO_09096				1.6													empty spiracles homeobox 2	AW461632	DNA binding;DNA binding;DNA binding;transcription factor activity;transcription factor activity;protein binding;transcription re... <Preview truncated at 128 characters>	regulation of transcription, DNA-dependent;regulation of transcription, DNA-dependent;regulation of transcription, DNA-dependent... <Preview truncated at 128 characters>	nucleus;nucleus;nucleus;nucleus;
Hipk1	OLIGO_10291				-1.58						1.83		-1.66	-1.62				homeodomain interacting protein kinase 1	AW461637	transcription factor binding;transcription factor binding;chromatin binding;transcription factor binding;	regulation of mesenchymal cell proliferation;pattern specification process;regulation of transforming growth factor beta recepto... <Preview truncated at 128 characters>	transcription factor complex;nucleus;transcription factor complex;nucleus;
PAG7	OLIGO_00016				-2.65		2.1				1.76	-2.77		2.03					AW461649	aspartic-type endopeptidase activity;aspartic-type endopeptidase activity;aspartic-type endopeptidase activity;aspartic-type end... <Preview truncated at 128 characters>	proteolysis;proteolysis;proteolysis;proteolysis;proteolysis;proteolysis;proteolysis;proteolysis;proteolysis;proteolysis;proteoly... <Preview truncated at 128 characters>
CKMT1B	OLIGO_03635				-1.62						2.01		-1.56					creatine kinase, mitochondrial 1B (EC:2.7.3.2)	AW461717	nucleotide binding;catalytic activity;creatine kinase activity;ATP binding;kinase activity;kinase activity;kinase activity;kinas... <Preview truncated at 128 characters>		mitochondrion;mitochondrion;mitochondrial inner membrane;mitochondrial inner membrane;membrane;
NUPR1	OLIGO_06379							1.54										nuclear protein 1	AW461802	prostaglandin-endoperoxide synthase activity;	acute inflammatory response;response to toxin;DNA damage response, signal transduction by p53 class mediator resulting in induct... <Preview truncated at 128 characters>	nuclear envelope;
USP14	OLIGO_06217				1.64													ubiquitin specific peptidase 14 (tRNA-guanine transglycosylase)	AW461839	ubiquitin thiolesterase activity;ubiquitin thiolesterase activity;ubiquitin thiolesterase activity;ubiquitin thiolesterase activ... <Preview truncated at 128 characters>	ubiquitin-dependent protein catabolic process;ubiquitin-dependent protein catabolic process;synaptic transmission;	proteasome complex;soluble fraction;cytoplasm;cytoplasm;plasma membrane;plasma membrane;membrane;synaptosome;
TNKS1BP1	OLIGO_03646				-1.66				1.5									tankyrase 1 binding protein 1	AW461846
BT.35853	OLIGO_08359								2.01										AW461864
DF	OLIGO_03655				-1.52													complement factor D (adipsin)	AW461905	catalytic activity;serine-type endopeptidase activity;serine-type endopeptidase activity;serine-type endopeptidase activity;pept... <Preview truncated at 128 characters>	proteolysis;proteolysis;proteolysis;complement activation, alternative pathway;innate immune response;proteolysis;	extracellular region;extracellular region;cellular_component;
Phlda1	OLIGO_06856				1.88	2.12	2.25	3.24	4.9				1.71	2.07	2.21	3.69		pleckstrin homology-like domain, family A, member 1	AW461932	protein binding;	FasL biosynthetic process;
NDUFV1	OLIGO_03660				-2.06				-1.8									NADH dehydrogenase (ubiquinone) flavoprotein 1	AW461976	NADH dehydrogenase activity;NADH dehydrogenase (ubiquinone) activity;NADH dehydrogenase (ubiquinone) activity;FMN binding;FMN bi... <Preview truncated at 128 characters>	transport;electron transport chain;oxidation reduction;oxidation reduction;oxidation reduction;	mitochondrion;mitochondrion;mitochondrial inner membrane;mitochondrial inner membrane;mitochondrial inner membrane;membrane;resp... <Preview truncated at 128 characters>
CD164	OLIGO_03661							1.62										CD164 antigen	AW462000	protein binding;protein binding;	cell adhesion;heterophilic cell-cell adhesion;muscle organ development;	lysosome;lysosome;lysosomal membrane;endosome;endosome;plasma membrane;plasma membrane;plasma membrane;endosome membrane;membran... <Preview truncated at 128 characters>
ACP2	OLIGO_08386				-1.87													acid phosphatase 2, lysosomal	AW462034	acid phosphatase activity;acid phosphatase activity;acid phosphatase activity;hydrolase activity;	skeletal system development;lysosome organization;	lysosome;lysosomal membrane;membrane;integral to membrane;lysosomal lumen;
PSMC1	OLIGO_06902				-1.64													proteasome (prosome, macropain) 26S subunit, ATPase, 1	AW462073	nucleotide binding;nucleotide binding;protein binding;ATP binding;ATP binding;ATP binding;hydrolase activity;nucleoside-triphosp... <Preview truncated at 128 characters>	protein catabolic process;protein catabolic process;	proteasome complex;nucleus;cytoplasm;cytoplasm;proteasome complex;nucleus;cytoplasm;proteasome complex;nucleus;cytoplasm;cytopla... <Preview truncated at 128 characters>
PTGS2	OLIGO_06930					2.1	2.98	4.19	12.42				1.66		2.13	1.79		prostaglandin-endoperoxide synthase 2 (prostaglandin G/H synthase and cyclooxygenase)	AW462092	peroxidase activity;peroxidase activity;peroxidase activity;peroxidase activity;prostaglandin-endoperoxide synthase activity;oxi... <Preview truncated at 128 characters>	prostaglandin biosynthetic process;fatty acid biosynthetic process;response to oxidative stress;response to oxidative stress;res... <Preview truncated at 128 characters>	cytoplasm;cytoplasm;endoplasmic reticulum;endoplasmic reticulum membrane;microsome;microsome;membrane;
LAD1	OLIGO_11363				-2.19													ladinin	AW462126		germ cell programmed cell death;
Bt.50402	OLIGO_06993						1.74	1.64	1.56					1.5		1.51			AW462141
FKSG24	OLIGO_07010				-2.58														AW462162
NAB1	OLIGO_03693				2.32													NGFI-A binding protein 1 (EGR1 binding protein 1)	AW462250	transcription repressor activity;transcription repressor activity;transcription repressor activity;	endochondral ossification;Schwann cell differentiation;negative regulation of transcription;negative regulation of transcription... <Preview truncated at 128 characters>	nucleus;nucleus;nucleus;Golgi apparatus;plasma membrane;
TRAPPC1	OLIGO_07226								-1.81										AW462274	spermidine synthase activity;molecular_function;molecular_function;molecular_function;molecular_function;molecular_function;mole... <Preview truncated at 128 characters>	transport;transport;ER to Golgi vesicle-mediated transport;vesicle-mediated transport;spermidine biosynthetic process;transport;... <Preview truncated at 128 characters>	endoplasmic reticulum;endoplasmic reticulum;Golgi apparatus;Golgi apparatus;cis-Golgi network;cis-Golgi network;cis-Golgi networ... <Preview truncated at 128 characters>
EPS8L1	OLIGO_07551				1.75		-1.93											EPS8-like 1	AW462315
TGFB1I1	OLIGO_07956				-1.79				-1.55									transforming growth factor beta 1 induced transcript 1	AW462329	transcription coactivator activity;protein binding;protein binding;zinc ion binding;metal ion binding;androgen receptor binding;... <Preview truncated at 128 characters>	positive regulation of epithelial to mesenchymal transition;Wnt receptor signaling pathway;morphogenesis of embryonic epithelium... <Preview truncated at 128 characters>	intracellular;nucleus;cytoplasm;cytoskeleton;cytoskeleton;cytoskeleton;focal adhesion;focal adhesion;nuclear matrix;cell junctio... <Preview truncated at 128 characters>
MIB2	OLIGO_08063				-1.55				-1.58										AW462384	signal transducer activity;protein binding;protein binding;	axon guidance;metanephros development;	cytoplasm;nucleus;
FZD5	OLIGO_07306				-1.97													frizzled homolog 5 (Drosophila)	AW462410
FAM53C	OLIGO_08412				1.71														AW462414
TRIP6	OLIGO_07381				-1.89													thyroid hormone receptor interactor 6	AW462496	interleukin-1 receptor binding;interleukin-1 receptor binding;zinc ion binding;kinase binding;kinase binding;identical protein b... <Preview truncated at 128 characters>	transcription;cell adhesion;release of cytoplasmic sequestered NF-kappaB;release of cytoplasmic sequestered NF-kappaB;positive r... <Preview truncated at 128 characters>	nucleus;nucleus;cytoplasm;cytoplasm;cytoskeleton;cytoskeleton;focal adhesion;focal adhesion;focal adhesion;cell junction;interle... <Preview truncated at 128 characters>
GAA	OLIGO_07499				-1.53													glucosidase, alpha; acid (Pompe disease, glycogen storage disease type II)	AW462517	hydrolase activity, hydrolyzing O-glycosyl compounds;alpha-glucosidase activity;alpha-glucosidase activity;alpha-glucosidase act... <Preview truncated at 128 characters>	regulation of the force of heart contraction;diaphragm contraction;diaphragm contraction;heart morphogenesis;carbohydrate metabo... <Preview truncated at 128 characters>	lysosome;lysosome;lysosome;lysosome;
RP5-1022P6.2	OLIGO_07714				1.53				1.98									hypothetical protein KIAA1434	AW462554
LOC512355	OLIGO_08504				2.65														AW462640	signal transducer activity;protein binding;protein binding;protein binding;electron carrier activity;	positive regulation of T cell cytokine production;protein complex assembly;activation of NF-kappaB-inducing kinase activity;sign... <Preview truncated at 128 characters>	mitochondrion;nucleus;
IL15RA	OLIGO_08478								1.88									interleukin 15 receptor, alpha	AW462714
IDH1	OLIGO_08296						-1.75		-1.64									isocitrate dehydrogenase 1 (NADP+), soluble	AW462719	magnesium ion binding;magnesium ion binding;magnesium ion binding;isocitrate dehydrogenase (NADP+) activity;isocitrate dehydroge... <Preview truncated at 128 characters>	glyoxylate cycle;tricarboxylic acid cycle;isocitrate metabolic process;isocitrate metabolic process;2-oxoglutarate metabolic pro... <Preview truncated at 128 characters>	cytoplasm;cytoplasm;cytoplasm;cytoplasm;cytosol;cytoplasm;
FADD	OLIGO_03721				1.89													Fas (TNFRSF6)-associated via death domain	AW462721	protein binding;protein binding;protein binding;identical protein binding;	apoptosis;signal transduction;regulation of apoptosis;positive regulation of I-kappaB kinase/NF-kappaB cascade;necrotic cell dea... <Preview truncated at 128 characters>	death-inducing signaling complex;
ZNF333	OLIGO_08640			1.63	-2.17														AW462735
Hmg20b	OLIGO_08446							1.8	2.02	1.53						2.97		high mobility group 20 B	AW462824	DNA binding;DNA binding;DNA binding;protein binding;	transcription;cell cycle;chromatin modification;regulation of transcription;	nucleus;nucleus;nucleus;nucleus;
LOC514613	OLIGO_08903								2.09										AW463136	DNA binding;ATP binding;	DNA replication;	cellular_component;
SLC2A3	OLIGO_10373						1.79	2.17	3.88									solute carrier family 2 (facilitated glucose transporter), member 3	AW463170	transporter activity;transporter activity;glucose transmembrane transporter activity;substrate-specific transmembrane transporte... <Preview truncated at 128 characters>	transport;transport;transport;transport;carbohydrate transport;transmembrane transport;transmembrane transport;transmembrane tra... <Preview truncated at 128 characters>	membrane;membrane;membrane;membrane;membrane;integral to membrane;integral to membrane;membrane;membrane;membrane;membrane;integ... <Preview truncated at 128 characters>
PLAUR	OLIGO_08470							1.5	3.61									plasminogen activator, urokinase receptor	AW463210	receptor activity;enzyme binding;		plasma membrane;plasma membrane;cell surface;membrane;anchored to membrane;
Galnt3	OLIGO_09609							2.01	2.35				1.5	1.7	1.83	5.08		UDP-N-acetyl-alpha-D-galactosamine:polypeptide N-acetylgalactosaminyltransferase 3 (GalNAc-T3) (EC:2.4.1.41)	AW463251	polypeptide N-acetylgalactosaminyltransferase activity;microtubule motor activity;	carbohydrate metabolic process;mitosis;mitotic spindle organization;mitotic centrosome separation;	membrane fraction;integral to membrane;
KRT19	OLIGO_08136				-3.69	-1.56			2.08		1.94	-1.67	-1.6	1.66				keratin 19	AW463298
RNH1	OLIGO_08473		1.53		1.89													ribonuclease/angiogenin inhibitor 1	AW463321	protein binding;protein binding;	biological_process;	cellular_component;
SAFB	OLIGO_09316				-1.71													scaffold attachment factor B	AW463379	nucleotide binding;nucleic acid binding;nucleic acid binding;nucleic acid binding;
SBF1	OLIGO_11362				-1.83													SET binding factor 1	AW463394		response to nutrient;activation of adenylate cyclase activity;	plasma membrane;
TINAGL1	OLIGO_11415				-2.35	-1.52												tubulointerstitial nephritis antigen-like 1	AW463460	extracellular matrix structural constituent;	mitosis;	spindle;nucleus;
FAM43A	OLIGO_03755				-1.65				-1.57										AW463471
CENPH	OLIGO_03756				-1.65													centromere protein H	AW463474	protein binding;protein binding;kinetochore binding;kinetochore binding;kinetochore binding;	chromosome segregation;cell division;	kinetochore;condensed chromosome kinetochore;condensed chromosome kinetochore;nucleus;nucleus;nucleus;nucleus;nucleus;chromosome... <Preview truncated at 128 characters>
Snx10	OLIGO_08500							1.9	1.91						1.61			sorting nexin 10	AW463500	protein binding;phosphoinositide binding;	transport;cell communication;protein transport;
UCHL1	OLIGO_03759				1.89			-1.88			-1.61		-2.24	2.11	-1.77	1.61		ubiquitin carboxyl-terminal esterase L1 (ubiquitin thiolesterase)	AW463522	cysteine-type endopeptidase activity;ubiquitin thiolesterase activity;ubiquitin thiolesterase activity;protein binding;peptidase... <Preview truncated at 128 characters>	ubiquitin-dependent protein catabolic process;response to stress;axon target recognition;adult walking behavior;cell proliferati... <Preview truncated at 128 characters>	intracellular;nucleus;cytoplasm;cytoplasm;cytoplasm;cytosol;axon;neuronal cell body;
MYL9	OLIGO_09747				1.53													myosin, light chain 9, regulatory	AW463524	motor activity;calcium ion binding;calcium ion binding;protein binding;calcium ion binding;calcium ion binding;calcium ion bindi... <Preview truncated at 128 characters>		myosin complex;
FOSL2	OLIGO_10810							1.79	1.93				1.63			1.87		FOS-like antigen 2	AW463531		regulation of transcription;entrainment of circadian clock;circadian rhythm;	cytoplasm;nuclear matrix;
SLC2A3	OLIGO_08513								1.78									solute carrier family 2 (facilitated glucose transporter), member 3	AW463609
HCG_2015269	OLIGO_11660								1.76									phosphoglycerate mutase 1-like	AW463643	catalytic activity;bisphosphoglycerate mutase activity;2,3-bisphospho-D-glycerate 2-phosphohydrolase activity;phosphoglycerate m... <Preview truncated at 128 characters>	glycolysis;glycolysis;metabolic process;
SLC7A7	OLIGO_03779				-1.69				-3.02									solute carrier family 7 (cationic amino acid transporter, y+ system), member 7	AW463705	amino acid transmembrane transporter activity;amino acid transmembrane transporter activity;	transport;amino acid transport;transmembrane transport;transmembrane transport;transport;amino acid transport;transmembrane tran... <Preview truncated at 128 characters>	membrane;membrane;integral to membrane;membrane;membrane;integral to membrane;
EPS15L1	OLIGO_03789				2.1														AW463807	calcium ion binding;calcium ion binding;protein binding;
GIT1	OLIGO_05918		1.54		2.03													G protein-coupled receptor kinase interactor 1	AW463852	ARF GTPase activator activity;zinc ion binding;	regulation of ARF GTPase activity;	cellular_component;
CD74	OLIGO_11390				-2.39	-1.79					2.99		-2.07	-1.97				CD74 molecule, major histocompatibility complex, class II invariant chain	AW463930	cytokine receptor activity;cytokine binding;MHC class II protein binding;MHC class II protein binding;	prostaglandin biosynthetic process;positive regulation of cytokine-mediated signaling pathway;positive regulation of cytokine-me... <Preview truncated at 128 characters>	lysosome;multivesicular body;endoplasmic reticulum;Golgi apparatus;plasma membrane;external side of plasma membrane;membrane;mem... <Preview truncated at 128 characters>
OSTF1	OLIGO_05953							1.53	1.86				1.61			1.99		osteoclast stimulating factor 1	AW463947	identical protein binding;		cytoplasm;cytoplasm;
PPP1R12A	OLIGO_05958				-1.74													protein phosphatase 1, regulatory (inhibitor) subunit 12A	AW464052
CFLAR	OLIGO_03799							1.69	1.58									CASP8 and FADD-like apoptosis regulator	AW464057
IL1RN	OLIGO_08561						2.28	5.3	7.52						1.72	1.82		interleukin 1 receptor antagonist	AW464123	interleukin-1 receptor antagonist activity;interleukin-1 receptor antagonist activity;	lipid metabolic process;insulin secretion;lipid metabolic process;insulin secretion;	extracellular region;extracellular region;extracellular region;extracellular space;extracellular space;vesicle;extracellular reg... <Preview truncated at 128 characters>
SMARCAL1	OLIGO_03804				-1.58	-1.52												Swi/SNF related matrix associated, actin dependent regulator of chromatin, subfamily a-like 1	AW464155	nucleotide binding;nucleic acid binding;DNA binding;DNA helicase activity;DNA helicase activity;helicase activity;helicase activ... <Preview truncated at 128 characters>	DNA metabolic process;DNA metabolic process;regulation of transcription from RNA polymerase II promoter;regulation of transcript... <Preview truncated at 128 characters>	nucleus;nucleus;nucleus;nucleus;nucleus;
HSD3B1	OLIGO_06519							-1.52	-1.9						-1.92			hydroxy-delta-5-steroid dehydrogenase, 3 beta- and steroid delta-isomerase 1	AW464162
LOC509642	OLIGO_03805								-1.77										AW464181	extracellular matrix structural constituent;	mitosis;	spindle;nucleus;
LOC508133	OLIGO_08568						2.09	2.24	2.33										AW464191	protein binding;protein binding;	regulation of muscle contraction;cell adhesion;cell-cell signaling;regulation of gene expression;activation of store-operated ca... <Preview truncated at 128 characters>	Golgi apparatus;plasma membrane;focal adhesion;costamere;membrane raft;membrane fraction;plasma membrane;
SLC15A1	OLIGO_11394						-1.53	-1.92	-2.89									solute carrier family 15 (oligopeptide transporter), member 1	AW464260	transporter activity;transporter activity;proton-dependent oligopeptide secondary active transmembrane transporter activity;olig... <Preview truncated at 128 characters>	transport;oligopeptide transport;oligopeptide transport;oligopeptide transport;oligopeptide transport;	membrane;membrane;membrane;integral to membrane;integral to membrane;integral to membrane;
RGAG4	OLIGO_03813				2.23														AW464288
TNFRSF6B	OLIGO_10039				1.54				2.13									tumor necrosis factor receptor superfamily, member 6b, decoy	AW464298	receptor activity;protein binding;
LOC509593	OLIGO_03817				1.74														AW464347
PLAT	OLIGO_08576				1.99	1.64		1.79	2.03			1.57	2		1.69	1.52		plasminogen activator, tissue	AW464360	catalytic activity;serine-type endopeptidase activity;serine-type endopeptidase activity;serine-type endopeptidase activity;seri... <Preview truncated at 128 characters>	response to hypoxia;proteolysis;proteolysis;proteolysis;proteolysis;smooth muscle cell migration;platelet-derived growth factor ... <Preview truncated at 128 characters>	extracellular region;extracellular region;extracellular space;extracellular space;cytoplasm;secretory granule;apical part of cel... <Preview truncated at 128 characters>
PFDN6	OLIGO_06026								1.53										AW464404	unfolded protein binding;chaperone binding;	protein folding;chaperone-mediated protein complex assembly;	prefoldin complex;prefoldin complex;
GPD1L	OLIGO_10223								-1.51									glycerol-3-phosphate dehydrogenase 1-like (EC:1.1.1.8)	AW464522
TIMP3	OLIGO_08560								2.06									TIMP metallopeptidase inhibitor 3 (Sorsby fundus dystrophy, pseudoinflammatory)	AW464550	enzyme inhibitor activity;protein binding;protein binding;metalloendopeptidase inhibitor activity;metalloendopeptidase inhibitor... <Preview truncated at 128 characters>	negative regulation of membrane protein ectodomain proteolysis;negative regulation of membrane protein ectodomain proteolysis;ne... <Preview truncated at 128 characters>	extracellular region;proteinaceous extracellular matrix;proteinaceous extracellular matrix;proteinaceous extracellular matrix;ba... <Preview truncated at 128 characters>
MYBPC2	OLIGO_11523			1.52	-2.53	-1.65												myosin binding protein C, fast-type	AW464619
MGC128086	OLIGO_10252				-1.5														AW464685		fatty acid biosynthetic process;lipid biosynthetic process;	endoplasmic reticulum;endoplasmic reticulum membrane;membrane;integral to membrane;integral to membrane;
LOC507436	OLIGO_08339							1.77	2.45		1.56								AW464762
ANKRD16	OLIGO_08604				1.69														AW464777
ARSA	OLIGO_06054				-1.9				-1.58									arylsulfatase A	AW464840	catalytic activity;catalytic activity;cerebroside-sulfatase activity;calcium ion binding;calcium ion binding;sulfuric ester hydr... <Preview truncated at 128 characters>	binding of sperm to zona pellucida;metabolic process;metabolic process;metabolic process;binding of sperm to zona pellucida;	integral to membrane of membrane fraction;lysosome;lysosome;plasma membrane;integral to membrane of membrane fraction;plasma mem... <Preview truncated at 128 characters>
RHOB	OLIGO_03834			1.52			1.61	1.75	2.55		1.75			1.7		1.61		ras homolog gene family, member B	AW464871	nucleotide binding;GTP binding;GTP binding;GTP binding;GTP binding;	angiogenesis;transport;apoptosis;cell adhesion;small GTPase mediated signal transduction;small GTPase mediated signal transducti... <Preview truncated at 128 characters>	intracellular;nucleus;nucleus;endosome;plasma membrane;plasma membrane;membrane;late endosome membrane;
NPPC	OLIGO_03837				-2													natriuretic peptide precursor type C	AW464920	receptor binding;hormone activity;hormone activity;hormone activity;	ossification;growth plate cartilage chondrocyte differentiation;growth plate cartilage chondrocyte proliferation;cGMP biosynthet... <Preview truncated at 128 characters>	extracellular region;extracellular region;extracellular region;extracellular region;
ETV3	OLIGO_06042					1.55		2.08	1.72	1.69			2.04		2.05	1.85		ets variant gene 3	AW464930
EGLN3	OLIGO_05898				1.57													EGL nine homolog 3 (C. elegans)	AW465035	iron ion binding;protein binding;oxidoreductase activity;oxidoreductase activity, acting on paired donors, with incorporation or... <Preview truncated at 128 characters>	oxidation reduction;
KRT15	OLIGO_10302				-1.52	-1.56			1.64										AW465060	structural molecule activity;protein binding;structural constituent of cytoskeleton;DNA-dependent ATPase activity;protein N-term... <Preview truncated at 128 characters>	positive regulation of RNA elongation;transcription-coupled nucleotide-excision repair;base-excision repair;	intermediate filament;soluble fraction;
S100A14	OLIGO_08510				1.55			1.63	1.64									S100 calcium binding protein A14	AW465094	calcium ion binding;		cytoplasm;cytoplasm;
MDS032	OLIGO_08616				-1.68	-1.73							-1.5						AW465155
Srgn	OLIGO_03857						1.55	5.31	6.8				1.96		2.96	2.77			AW465275	protein binding;	apoptosis;negative regulation of bone mineralization;mast cell secretory granule organization;T cell secretory granule organizat... <Preview truncated at 128 characters>	extracellular space;Golgi apparatus;mast cell granule;
SLC17A7	OLIGO_06090		1.78		2.05	1.54													AW465294	symporter activity;sodium:inorganic phosphate symporter activity;	transport;ion transport;sodium ion transport;neurotransmitter transport;sequestering of neurotransmitter;transmembrane transport... <Preview truncated at 128 characters>	membrane;membrane;integral to membrane;integral to membrane;synaptosome;synaptosome;cell junction;synaptic vesicle membrane;cyto... <Preview truncated at 128 characters>
Tegt	OLIGO_11665				-1.64				-1.62							-1.71		testis enhanced gene transcript	AW465347
Pnpt1	OLIGO_06104							1.63					1.55					polyribonucleotide nucleotidyltransferase 1	AW465370		response to glucocorticoid stimulus;	extracellular space;
MGC151989	OLIGO_06101								-1.61										AW465435
CDK4	OLIGO_06115				1.85													cyclin-dependent kinase 4	AW465448	nucleotide binding;protein kinase activity;protein kinase activity;protein kinase activity;protein serine/threonine kinase activ... <Preview truncated at 128 characters>	G1/S transition of mitotic cell cycle;protein amino acid phosphorylation;protein amino acid phosphorylation;protein amino acid p... <Preview truncated at 128 characters>	cyclin-dependent protein kinase holoenzyme complex;cyclin-dependent protein kinase holoenzyme complex;nucleus;nucleus;transcript... <Preview truncated at 128 characters>
C17ORF61	OLIGO_08388				2.09														AW465457
GNG5	OLIGO_07046						1.83	1.84	2.07									guanine nucleotide binding protein (G protein), gamma 5	AW465466	signal transducer activity;signal transducer activity;signal transducer activity;	signal transduction;G-protein coupled receptor protein signaling pathway;G-protein coupled receptor protein signaling pathway;	mitochondrion;heterotrimeric G-protein complex;heterotrimeric G-protein complex;plasma membrane;plasma membrane;membrane;
ROBO4	OLIGO_10829				-1.81													roundabout homolog 4 (Drosophila)	AW465501		angiogenesis;angiogenesis;
STC1	OLIGO_10386							1.67	1.89									stanniocalcin 1	AW465510	hormone activity;hormone activity;		extracellular region;extracellular region;extracellular region;extracellular space;
C18ORF30	OLIGO_06121				1.59														AW465522
CDK2	OLIGO_06116				1.57													cyclin-dependent kinase 2	AW465591	nucleotide binding;protein kinase activity;protein kinase activity;protein kinase activity;protein serine/threonine kinase activ... <Preview truncated at 128 characters>	protein amino acid phosphorylation;protein amino acid phosphorylation;protein amino acid phosphorylation;protein amino acid phos... <Preview truncated at 128 characters>	cyclin-dependent protein kinase holoenzyme complex;cyclin-dependent protein kinase holoenzyme complex;cyclin-dependent protein k... <Preview truncated at 128 characters>
JUND	OLIGO_10548						2.07	1.55										jun D proto-oncogene	AW465610	DNA binding;DNA binding;transcription factor activity;transcription factor activity;transcription factor activity;sequence-speci... <Preview truncated at 128 characters>	osteoblast development;transcription;regulation of transcription, DNA-dependent;regulation of transcription, DNA-dependent;regul... <Preview truncated at 128 characters>	nucleus;nucleus;nucleus;
DUSP1	OLIGO_10175						1.61	2.45	5.29				1.54		1.52	2.16		dual specificity phosphatase 1	AW465681	protein tyrosine phosphatase activity;protein tyrosine phosphatase activity;protein binding;protein tyrosine/serine/threonine ph... <Preview truncated at 128 characters>	protein amino acid dephosphorylation;protein amino acid dephosphorylation;protein amino acid dephosphorylation;protein amino aci... <Preview truncated at 128 characters>
LOC505518	OLIGO_03886			2.39	-2.68				-2.23										AW465704
TSPAN3	OLIGO_11115				-1.77				-1.56										AW465786		gastric acid secretion;	membrane;membrane;integral to membrane;integral to membrane;integral to membrane;integral to membrane;integral to membrane;
TRIM65	OLIGO_06185				-1.88		1.52				1.88		-1.51	1.51					AW465793
LOC539899	OLIGO_06153		-1.53		-1.87						2.2	-1.53							AW465842	protein binding;structural molecule activity;		intracellular;membrane fraction;microtubule associated complex;
BT.65311	OLIGO_06162							1.71	1.94										AW465865		regulation of transcription;entrainment of circadian clock;circadian rhythm;	cytoplasm;nuclear matrix;
NFKB1	OLIGO_08675				1.57				1.52									nuclear factor of kappa light polypeptide gene enhancer in B-cells 1 (p105)	AW465881	transcription factor activity;transcription factor activity;transcription factor activity;protein binding;protein binding;specif... <Preview truncated at 128 characters>	negative regulation of cytokine production;regulation of transcription, DNA-dependent;signal transduction;positive regulation of... <Preview truncated at 128 characters>	nucleus;nucleus;nucleus;nucleus;cytosol;nucleus;nucleus;nucleus;nucleus;cytosol;
BAD	OLIGO_06199						-1.73											BCL2-antagonist of cell death	AW466001	protein binding;protein binding;protein kinase binding;	glucose catabolic process;cell proliferation;induction of apoptosis by extracellular signals;cytokine-mediated signaling pathway... <Preview truncated at 128 characters>	cytoplasm;mitochondrion;cytosol;
CAPN2	OLIGO_08681							1.51	2.9									calpain 2, (m/II) large subunit	AW466026	cysteine-type endopeptidase activity;calcium-dependent cysteine-type endopeptidase activity;calcium ion binding;calcium ion bind... <Preview truncated at 128 characters>	blastocyst development;proteolysis;proteolysis;myoblast fusion;neuron differentiation;cell proliferation;response to oxidative s... <Preview truncated at 128 characters>	intracellular;cytoplasm;cytoplasm;plasma membrane;plasma membrane;membrane;axon part;plasma membrane;cell cortex;
Phlda2	OLIGO_11299							1.88	2.28						1.57	1.93		pleckstrin homology-like domain, family A, member 2	AW466053		organ morphogenesis;	cytoplasm;cytoplasm;membrane;membrane;
Adam19	OLIGO_03901			1.52				1.81	1.84						1.59	1.61		ADAM metallopeptidase domain 19 (meltrin beta)	AW466088	metalloendopeptidase activity;metalloendopeptidase activity;metalloendopeptidase activity;zinc ion binding;	proteolysis;proteolysis;proteolysis;membrane protein ectodomain proteolysis;heart development;
LOC387763	OLIGO_10816							1.7	2.13	1.66			1.5	1.62					AW466142
LOC535487	OLIGO_03910				-2.32	-2.01													AW466177
LOC522307	OLIGO_03911				-1.57														AW466178	DNA binding;DNA-directed DNA polymerase activity;	gene expression;homeostasis of number of cells within a tissue;response to drug;plasma membrane organization;phospholipid transl... <Preview truncated at 128 characters>
MGAT5B	OLIGO_12889				-2.22													mannosyl (alpha-1,6-)-glycoprotein beta-1,6-N-acetyl-glucosaminyltransferase, isozyme B	AW484574
Pag1	OLIGO_12662				-1.82				-1.93							-1.88			AW657028	aspartic-type endopeptidase activity;aspartic-type endopeptidase activity;aspartic-type endopeptidase activity;aspartic-type end... <Preview truncated at 128 characters>	proteolysis;proteolysis;proteolysis;proteolysis;signal transduction;cell-cell signaling;negative regulation of cell differentiat... <Preview truncated at 128 characters>	extracellular region;extracellular space;plasma membrane;neuronal cell body;secretory granule;integral to membrane;
GABRD	OLIGO_13129				-1.72	-1.8												gamma-aminobutyric acid (GABA) A receptor, delta	AW669606	receptor activity;GABA-A receptor activity;ion channel activity;extracellular ligand-gated ion channel activity;extracellular li... <Preview truncated at 128 characters>	transport;transport;ion transport;ion transport;ion transport;ion transport;ion transport;ion transport;	plasma membrane;membrane;membrane;membrane;membrane;membrane;integral to membrane;integral to membrane;integral to membrane;inte... <Preview truncated at 128 characters>
DCT	OLIGO_00115			1.76	-2.02		-1.58											dopachrome tautomerase (dopachrome delta-isomerase, tyrosine-related protein 2)	AY278108	dopachrome isomerase activity;dopachrome isomerase activity;dopachrome isomerase activity;oxidoreductase activity;isomerase acti... <Preview truncated at 128 characters>	melanin biosynthetic process from tyrosine;melanin biosynthetic process from tyrosine;metabolic process;melanin biosynthetic pro... <Preview truncated at 128 characters>	microsome;microsome;cytosol;cytosol;membrane;integral to membrane;melanosome membrane;melanosome;
LOC616912	OLIGO_10434				-1.63	-1.66													AY563793
AY563904	OLIGO_09299								1.83							1.9			AY563904
CCR3	OLIGO_00118							2.31	3.4						1.57			chemokine (C-C motif) receptor 3	AY574996	protein binding;signal transducer activity;acyltransferase activity;epidermal growth factor receptor binding;protein binding;CD2... <Preview truncated at 128 characters>	embryonic hindlimb morphogenesis;embryonic digit morphogenesis;cell migration involved in gastrulation;negative regulation of Wn... <Preview truncated at 128 characters>	membrane fraction;membrane fraction;endoplasmic reticulum;
BCAZ0002AL20	OLIGO_06663				-1.54														BCAZ0002al20
FKBP3	OLIGO_11071						-1.63		-2.46									FK506 binding protein 3	BCAZ0004ac04
BCAZ0017ek20	OLIGO_10984						1.84		1.82					1.75					BCAZ0017ek20
BCAZ0019EI08	OLIGO_07718						-1.56	-2.3	-3.6										BCAZ0019ei08
PSMB3	OLIGO_10662				1.64													proteasome (prosome, macropain) subunit, beta type, 3	BCAZ0019el02
MVP	OLIGO_12373				-1.79													major vault protein	BE754538			cytoplasm;cytoplasm;cytoplasm;ribonucleoprotein complex;cytoplasm;
Cyb5r1	OLIGO_12507				-1.76						1.5							cytochrome b5 reductase 1	BE756419	cytochrome-b5 reductase activity;oxidoreductase activity;oxidoreductase activity;oxidoreductase activity;oxidoreductase activity... <Preview truncated at 128 characters>	steroid biosynthetic process;lipid biosynthetic process;sterol biosynthetic process;oxidation reduction;oxidation reduction;oxid... <Preview truncated at 128 characters>	mitochondrion;membrane;membrane;integral to membrane;
SLC39A13	OLIGO_12628				-2.58	-1.52												solute carrier family 39 (metal ion transporter), member 13	BE810055	metal ion transmembrane transporter activity;	transport;ion transport;zinc ion transport;metal ion transport;transmembrane transport;	membrane;membrane;membrane;integral to membrane;
CD80	OLIGO_04682							1.73										CD80 molecule	BF039039	coreceptor activity;transcription activator activity;protein binding;protein binding;protein homodimerization activity;G-protein... <Preview truncated at 128 characters>	cell-cell signaling;positive regulation of signal transduction;T cell activation;positive regulation of interleukin-2 biosynthet... <Preview truncated at 128 characters>	plasma membrane;integral to membrane;external side of plasma membrane;axon;integral to plasma membrane;integral to membrane;nucl... <Preview truncated at 128 characters>
PYCR2	OLIGO_08699				1.5													pyrroline-5-carboxylate reductase family, member 2	BF039051	catalytic activity;pyrroline-5-carboxylate reductase activity;pyrroline-5-carboxylate reductase activity;binding;oxidoreductase ... <Preview truncated at 128 characters>	proline biosynthetic process;proline biosynthetic process;metabolic process;cellular amino acid biosynthetic process;oxidation r... <Preview truncated at 128 characters>
MRPL48	OLIGO_04691				1.69														BF039118	structural constituent of ribosome;	translation;	intracellular;mitochondrion;mitochondrion;mitochondrion;ribosome;ribosome;ribonucleoprotein complex;
BT.53772	OLIGO_09333					-1.54													BF039132
UBE2N	OLIGO_08872				1.51													ubiquitin-conjugating enzyme E2N (UBC13 homolog, yeast)	BF039137	nucleotide binding;ubiquitin-protein ligase activity;ubiquitin-protein ligase activity;protein binding;ATP binding;ligase activi... <Preview truncated at 128 characters>	double-strand break repair via homologous recombination;DNA double-strand break processing;DNA repair;postreplication repair;ubi... <Preview truncated at 128 characters>	nucleus;nucleus;UBC13-MMS2 complex;nucleus;nucleus;UBC13-MMS2 complex;nucleus;UBC13-MMS2 complex;cytoplasm;
PPP1R3C	OLIGO_04700								1.78									protein phosphatase 1, regulatory (inhibitor) subunit 3C	BF039138		carbohydrate metabolic process;glycogen metabolic process;
LOC540664	OLIGO_04196							2.99	4.99										BF039202	receptor binding;	signal transduction;cell adhesion;
Plp2	OLIGO_09290						1.82		1.95					1.89		2.04		proteolipid protein 2	BF039237	protein binding;chemokine binding;		plasma membrane;membrane;membrane;membrane;integral to membrane;
ABCA1	OLIGO_09286							1.61										ATP-binding cassette, sub-family A (ABC1), member 1	BF039264
TFDP2	OLIGO_05060								-1.57									transcription factor Dp-2 (E2F dimerization partner 2)	BF039311	DNA binding;transcription factor activity;transcription factor activity;protein domain specific binding;DNA binding;transcriptio... <Preview truncated at 128 characters>	transcription;regulation of transcription, DNA-dependent;regulation of transcription, DNA-dependent;regulation of transcription;... <Preview truncated at 128 characters>	nucleus;nucleus;transcription factor complex;nucleus;nucleus;transcription factor complex;
C15ORF26	OLIGO_04215						-2.22												BF039326
FGF1	OLIGO_04213				1.84													fibroblast growth factor 1 (acidic)	BF039328	fibroblast growth factor receptor binding;protein binding;protein binding;growth factor activity;growth factor activity;growth f... <Preview truncated at 128 characters>	angiogenesis;induction of an organ;positive regulation of protein amino acid phosphorylation;multicellular organismal developmen... <Preview truncated at 128 characters>	extracellular region;proteinaceous extracellular matrix;extracellular space;cytosol;cytosol;
BT.24982	OLIGO_04203				1.67														BF039339
FBXO25	OLIGO_04626								-2.52									F-box protein 25	BF039392			nucleus;nucleus;
BT.13202	OLIGO_09250				1.82														BF039398
LOC615358	OLIGO_08927			1.78	-3.35				-2.25										BF039401
MGC127521	OLIGO_08652		1.56																BF039417	SH3 domain binding;	transport;protein transport;	nucleus;nucleus;cytoplasm;endosome;endosome;microtubule organizing center;cytoskeleton;cytoskeleton;membrane;late endosome membr... <Preview truncated at 128 characters>
ZKSCAN1	OLIGO_05057				1.5														BF039448
PIM1	OLIGO_09277							1.66						1.65	1.55			pim-1 oncogene	BF039454	nucleotide binding;protein kinase activity;protein kinase activity;protein kinase activity;protein serine/threonine kinase activ... <Preview truncated at 128 characters>	protein amino acid phosphorylation;protein amino acid phosphorylation;protein amino acid phosphorylation;protein amino acid phos... <Preview truncated at 128 characters>	nucleus;nucleus;cytoplasm;cytoplasm;cytoplasm;cytoplasm;
PLAU	OLIGO_08540					1.51	1.91	2.64	5.61									plasminogen activator, urokinase	BF039457	catalytic activity;serine-type endopeptidase activity;serine-type endopeptidase activity;serine-type endopeptidase activity;seri... <Preview truncated at 128 characters>	response to hypoxia;proteolysis;proteolysis;proteolysis;smooth muscle cell migration;regulation of cell proliferation;	extracellular region;extracellular region;
SCARB1	OLIGO_04987				-1.81				-1.69									scavenger receptor class B, member 1	BF039639	lipopolysaccharide receptor activity;receptor activity;low-density lipoprotein binding;apolipoprotein A-I binding;high-density l... <Preview truncated at 128 characters>	endothelial cell proliferation;cholesterol catabolic process;cell adhesion;positive regulation of cholesterol storage;lipopolysa... <Preview truncated at 128 characters>	integral to membrane of membrane fraction;plasma membrane;plasma membrane;integral to plasma membrane;caveola;caveola;membrane;m... <Preview truncated at 128 characters>
TXNDC9	OLIGO_09462				2.03													thioredoxin domain containing 9	BF039655	protein binding;	cell redox homeostasis;cell redox homeostasis;
PSPC1	OLIGO_04092				-1.75				-1.55									paraspeckle component 1	BF039699	nucleotide binding;nucleic acid binding;RNA binding;protein binding;protein binding;	transcription;regulation of transcription;	nucleus;nucleoplasm;nucleolus;cytoplasm;cytoplasm;nuclear matrix;paraspeckles;
LHX6	OLIGO_06497				2.05													LIM homeobox protein 6	BF039715	ubiquitin-protein ligase activity;transcription corepressor activity;ubiquitin-protein ligase activity;protein binding;protein b... <Preview truncated at 128 characters>	negative regulation of transcription;melanocyte differentiation;anagen;developmental pigmentation;	transcriptional repressor complex;
MGC127049	OLIGO_11533			1.88	-2.51				-1.52										BF039729	nucleotide binding;nucleic acid binding;translation repressor activity;	stress granule assembly;	stress granule;
TBCD	OLIGO_09201			1.53	-1.66													tubulin folding cofactor D	BF039754	binding;binding;binding;	post-chaperonin tubulin folding pathway;	cytosol;
XBP1	OLIGO_07752						1.78							1.82				X-box binding protein 1	BF039767
NDUFAB1	OLIGO_06511				1.52													NADH dehydrogenase (ubiquinone) 1, alpha/beta subcomplex, 1, 8kDa	BF039771	acyl carrier activity;acyl carrier activity;fatty acid binding;NADH dehydrogenase (ubiquinone) activity;oxidoreductase activity;... <Preview truncated at 128 characters>	mitochondrial electron transport, NADH to ubiquinone;fatty acid biosynthetic process;fatty acid biosynthetic process;fatty acid ... <Preview truncated at 128 characters>	mitochondrion;mitochondrion;mitochondrion;mitochondrial respiratory chain complex I;mitochondrial matrix;mitochondrial membrane;... <Preview truncated at 128 characters>
KIAA0082	OLIGO_07068						1.57												BF039787	nucleic acid binding;nucleic acid binding;protein binding;methyltransferase activity;	methylation;	intracellular;
LOC537311	OLIGO_08720								-1.52										BF039815	nucleic acid binding;
IER3	OLIGO_10856				1.64	1.53	1.6	2.86	4.59				1.59		1.63			immediate early response 3	BF039878	protein binding;
FOS	OLIGO_09217			1.72		1.69	3.09	3.07	4.3				2.03	2.8	2.17	3.26		v-fos FBJ murine osteosarcoma viral oncogene homolog	BF039907	DNA binding;DNA binding;DNA binding;double-stranded DNA binding;transcription factor activity;transcription factor activity;tran... <Preview truncated at 128 characters>	regulation of transcription, DNA-dependent;regulation of transcription, DNA-dependent;regulation of transcription, DNA-dependent... <Preview truncated at 128 characters>	nucleus;nucleus;nucleus;nucleus;nucleus;transcription factor complex;transcription factor complex;nucleus;nucleus;transcription ... <Preview truncated at 128 characters>
HKDC1	OLIGO_04927				-1.56														BF039994
LOC508722	OLIGO_04067				-1.72				-1.7										BF040025	nucleotide binding;nucleic acid binding;RNA binding;protein binding;transcription coactivator activity;protein binding;transcrip... <Preview truncated at 128 characters>	mRNA processing;positive regulation of protein catabolic process;NLS-bearing substrate import into nucleus;transcription from RN... <Preview truncated at 128 characters>	nucleus;nucleus;cytoskeleton;nucleus;nucleus;nucleus;ubiquitin ligase complex;membrane fraction;ubiquitin ligase complex;membran... <Preview truncated at 128 characters>
SMAD6	OLIGO_08484				1.59													SMAD family member 6	BF040034	protein binding;sequence-specific DNA binding;transcription activator activity;protein binding;	immune response;zygotic specification of dorsal/ventral axis;negative regulation of BMP signaling pathway;positive regulation of... <Preview truncated at 128 characters>	cytoplasm;cytoplasm;
TIPARP	OLIGO_11452						1.64		1.78										BF040052	transcription factor activity;transcription factor activity;	vasculogenesis;kidney development;protein amino acid ADP-ribosylation;nitrogen compound metabolic process;post-embryonic develop... <Preview truncated at 128 characters>	cytoplasm;PcG protein complex;nucleus;
TRIM25	OLIGO_04429							1.68	1.89				1.56			1.81		tripartite motif-containing 25	BF040073	protein binding;zinc ion binding;metal ion binding;		nucleus;cytoplasm;cytoplasm;focal adhesion;cell junction;
SDBCAG84	OLIGO_06436			1.58	-2.14													ERGIC and golgi 3	BF040226		transport;vesicle-mediated transport;	endoplasmic reticulum;endoplasmic reticulum membrane;Golgi apparatus;Golgi apparatus;membrane;integral to membrane;ER-Golgi inte... <Preview truncated at 128 characters>
EPB41L3	OLIGO_04432								-1.93										BF040254
DUSP4	OLIGO_04366				-1.72						1.63							dual specificity phosphatase 4	BF040271
Plac8	OLIGO_09129					-2.06		1.69	2.52					1.77	2.04	2.19		placenta-specific 8	BF040284
LOC615041	OLIGO_04870				1.52			1.52											BF040300
SCRN1	OLIGO_04871		1.52		2.33	1.52												secernin 1	BF040336	molecular_function;dipeptidase activity;	proteolysis;exocytosis;exocytosis;	cellular_component;nucleus;cytoplasm;cytoplasm;nuclear membrane;
BF040347	OLIGO_04869		-1.58		-1.76	-2.23													BF040347
CASP7	OLIGO_04367		-1.92															caspase 7, apoptosis-related cysteine peptidase	BF040440
CALM2	OLIGO_10446				1.64	1.57												calmodulin 2 (phosphorylase kinase, delta)	BF040461
HSP90AB1	OLIGO_11283			1.7	-1.96														BF040464	nucleotide binding;ATP binding;ATP binding;ATP binding;ATP binding;unfolded protein binding;unfolded protein binding;ATP binding... <Preview truncated at 128 characters>	placenta development;protein folding;protein folding;response to stress;response to stress;response to stress;negative regulatio... <Preview truncated at 128 characters>	intracellular;cytoplasm;cytoplasm;cytoplasm;mitochondrion;mitochondrion;melanosome;intracellular;cytoplasm;mitochondrion;
COX7C	OLIGO_08138				1.56				-2.13									cytochrome c oxidase subunit VIIc	BF040485
Tmem180	OLIGO_06365				-1.83				-1.62		1.51								BF040530			membrane;membrane;integral to membrane;
LOC616849	OLIGO_09078				1.68														BF040569
CPSF1	OLIGO_04296				1.91													cleavage and polyadenylation specific factor 1, 160kDa	BF040614	nucleic acid binding;RNA binding;mRNA 3-UTR binding;protein binding;nucleic acid binding;mRNA 3-UTR binding;protein binding;mR... <Preview truncated at 128 characters>	mRNA polyadenylation;mRNA cleavage;mRNA processing;mRNA polyadenylation;mRNA cleavage;mRNA polyadenylation;mRNA cleavage;	nucleus;nucleus;nucleoplasm;mRNA cleavage and polyadenylation specificity factor complex;nucleus;mRNA cleavage and polyadenylati... <Preview truncated at 128 characters>
MKRN2	OLIGO_10565				1.83													makorin, ring finger protein, 2	BF040653	nucleic acid binding;zinc ion binding;metal ion binding;nucleic acid binding;protein binding;zinc ion binding;zinc ion binding;m... <Preview truncated at 128 characters>		intracellular;intracellular;
KIAA0247	OLIGO_04795				-1.67			1.8							1.55				BF040659
PPP1R13L	OLIGO_11439				-1.74														BF040673
HPSE	OLIGO_06136						1.8	1.57										heparanase	BF040685	hydrolase activity;hydrolase activity, acting on glycosyl bonds;		extracellular region;extracellular region;lysosome;lysosomal membrane;membrane;membrane;
LOC540869	OLIGO_06295								1.82										BF040697	cation transmembrane transporter activity;protein serine/threonine kinase activity;uroporphyrinogen decarboxylase activity;	transport;ion transport;cation transport;zinc ion transport;response to toxin;zinc ion homeostasis;transmembrane transport;intra... <Preview truncated at 128 characters>	endosome;endosome membrane;membrane;membrane;integral to membrane;
HSPA4	OLIGO_07765				-1.78													heat shock 70kDa protein 4	BF040722
TACSTD1	OLIGO_11364			1.79				2.66	2.33									tumor-associated calcium signal transducer 1	BF040754
NRP2	OLIGO_04796						1.55											neuropilin 2	BF040826	vascular endothelial growth factor receptor activity;semaphorin receptor activity;vascular endothelial growth factor receptor ac... <Preview truncated at 128 characters>	heart development;neural crest cell migration;negative chemotaxis;neural crest cell migration;neural crest cell migration;heart ... <Preview truncated at 128 characters>	membrane fraction;membrane fraction;plasma membrane;soluble fraction;cytosol;integral to plasma membrane;integral to membrane;me... <Preview truncated at 128 characters>
MGC127307	OLIGO_04743						2.03	2.14	3.44				1.68	1.5	1.79	2.73			BF040971
MXD4	OLIGO_04738				-2.63	-1.92			-2									MAX dimerization protein 4	BF040980	DNA binding;protein binding;transcription regulator activity;transcription regulator activity;	negative regulation of transcription;regulation of transcription;regulation of transcription;	nucleus;
LOC510140	OLIGO_04735								1.73										BF040990
PAFAH1B1	OLIGO_04679		1.51															platelet-activating factor acetylhydrolase, isoform Ib, alpha subunit 45kDa	BF041035	protein binding;protein binding;protein binding;microtubule binding;heparin binding;dynactin binding;phospholipase binding;dynei... <Preview truncated at 128 characters>	transport;cell cycle;mitosis;multicellular organismal development;nervous system development;lipid catabolic process;cell differ... <Preview truncated at 128 characters>	nucleus;cytoplasm;microtubule organizing center;spindle;cytosol;cytoskeleton;cytoskeleton;microtubule;membrane;nuclear membrane;
ADAMDEC1	OLIGO_04239			1.84	-2.76				-3.34									ADAM-like, decysin 1	BF041123	metalloendopeptidase activity;metalloendopeptidase activity;peptidase activity;metallopeptidase activity;zinc ion binding;hydrol... <Preview truncated at 128 characters>	proteolysis;proteolysis;sulfur metabolic process;N-acetylglucosamine metabolic process;N-acetylglucosamine metabolic process;	trans-Golgi network;
ITGB6	OLIGO_04607						2.77	3.39	5.64				1.99	1.98	2.99	2.64		integrin, beta 6	BF041132	receptor activity;receptor activity;receptor activity;receptor activity;receptor activity;receptor activity;receptor activity;re... <Preview truncated at 128 characters>	inflammatory response;cell adhesion;cell adhesion;cell adhesion;cell adhesion;cell adhesion;cell adhesion;cell adhesion;cell adh... <Preview truncated at 128 characters>	integrin complex;integrin complex;integrin complex;integrin complex;integrin complex;integrin complex;integrin complex;membrane;... <Preview truncated at 128 characters>
HOXB6	OLIGO_09253						-1.56	-1.86										homeobox B6	BF041149
BT.3422	OLIGO_11552				-1.93				-1.55										BF041211
DUSP6	OLIGO_08978							2.5					1.5		1.7			dual specificity phosphatase 6	BF041230	phosphoprotein phosphatase activity;phosphoprotein phosphatase activity;protein serine/threonine phosphatase activity;protein ty... <Preview truncated at 128 characters>	inactivation of MAPK activity;protein amino acid dephosphorylation;protein amino acid dephosphorylation;protein amino acid depho... <Preview truncated at 128 characters>	cytoplasm;cytoplasm;cytoplasm;cytoplasm;cytoplasm;
SPAG1	OLIGO_04603								1.78									sperm associated antigen 1	BF041310
F3	OLIGO_04599						2.03	3.17	6.04							2.3		coagulation factor III (thromboplastin, tissue factor)	BF041314	molecular_function;	blood coagulation;blood coagulation;blood coagulation;	membrane;membrane;integral to membrane;integral to membrane;integral to membrane;
DSCR1	OLIGO_05033				1.76	1.57			1.77									regulator of calcineurin 1	BF041330	protein binding;	calcium-mediated signaling;regulation of phosphoprotein phosphatase activity;skeletal muscle fiber development;	nucleus;cytoplasm;
FLJ12716	OLIGO_05021				1.62														BF041346
NOS2A	OLIGO_10811					1.65	2.57	3.22	2.72		1.66		2.12	1.97	2.21	2.13		nitric oxide synthase 2A (inducible, hepatocytes) (EC:1.14.13.39)	BF041352
EIF4B	OLIGO_05025				-1.75				-2							-1.91		eukaryotic translation initiation factor 4B	BF041358	nucleotide binding;nucleic acid binding;translation initiation factor activity;
RBED1	OLIGO_04537		1.52		1.9													RNA binding motif and ELMO domain 1	BF041442		phagocytosis;phagocytosis;	cytoskeleton;cytoskeleton;
EGR1	OLIGO_10820			1.72	1.98		1.66	3.26	2.4	1.51	1.75		1.86	1.78	2.22	1.71		early growth response 1	BF041454	nucleic acid binding;DNA binding;transcription factor activity;transcription factor activity;protein binding;zinc ion binding;zi... <Preview truncated at 128 characters>	negative regulation of transcription from RNA polymerase II promoter;transcription;regulation of transcription, DNA-dependent;re... <Preview truncated at 128 characters>	intracellular;intracellular;nucleus;nucleus;nucleus;nucleus;cytoplasm;intracellular;intracellular;nucleus;
BT.15900	OLIGO_04542								-1.94										BF041460	catalytic activity;adenosylhomocysteinase activity;adenosylhomocysteinase activity;adenosylhomocysteinase activity;binding;hydro... <Preview truncated at 128 characters>	one-carbon metabolic process;one-carbon metabolic process;one-carbon metabolic process;metabolic process;
LAMC2	OLIGO_09130							1.68	5.29									laminin, gamma 2	BF041482	adenosine deaminase activity;double-stranded RNA binding;thymidine kinase activity;protein binding;	regulation of cell migration;	laminin-2 complex;extracellular space;membrane fraction;soluble fraction;cell cortex;integral to plasma membrane;membrane fracti... <Preview truncated at 128 characters>
TCAM1	OLIGO_04539							-1.68										testicular cell adhesion molecule 1	BF041486		cell-cell adhesion;	<31x31 double>
LOC508226	OLIGO_04126				-2.24				-1.81	2.29	1.57								BF041571
DDX23	OLIGO_04113				-2.33	-1.7												DEAD (Asp-Glu-Ala-Asp) box polypeptide 23	BF041597	nucleotide binding;nucleic acid binding;nucleic acid binding;nucleic acid binding;helicase activity;helicase activity;protein bi... <Preview truncated at 128 characters>		U5 snRNP;
NCOA2	OLIGO_04127				-2.53				-1.51									nuclear receptor coactivator 2	BF041605	transcription regulator activity;nuclear hormone receptor binding;transcription coactivator activity;signal transducer activity;	regulation of transcription, DNA-dependent;signal transduction;regulation of transcription, DNA-dependent;regulation of transcri... <Preview truncated at 128 characters>	nucleus;nucleus;
GATA3	OLIGO_04116			1.51					1.66									GATA binding protein 3	BF041614	DNA binding;transcription factor activity;transcription factor activity;zinc ion binding;zinc ion binding;transcription activato... <Preview truncated at 128 characters>	cell fate determination;mesonephros development;transcription;regulation of transcription, DNA-dependent;regulation of transcrip... <Preview truncated at 128 characters>	nucleus;nucleus;nucleus;
OTUD5	OLIGO_04549							1.5	2.77									OTU domain containing 5	BF041642
Sod2	OLIGO_04552						1.6	2.41	2.23				1.65	1.63	1.65	1.83		superoxide dismutase 2, mitochondrial	BF041653	superoxide dismutase activity;superoxide dismutase activity;superoxide dismutase activity;superoxide dismutase activity;superoxi... <Preview truncated at 128 characters>	age-dependent response to reactive oxygen species;regulation of transcription from RNA polymerase II promoter;superoxide metabol... <Preview truncated at 128 characters>	mitochondrion;mitochondrial matrix;
IK	OLIGO_09214				-1.63													IK cytokine, down-regulator of HLA II	BF041688			nucleus;
CTSD	OLIGO_10916							1.68										cathepsin D	BF041694	aspartic-type endopeptidase activity;aspartic-type endopeptidase activity;aspartic-type endopeptidase activity;aspartic-type end... <Preview truncated at 128 characters>	autophagic vacuole assembly;proteolysis;proteolysis;proteolysis;proteolysis;autophagic vacuole assembly;cholesterol metabolic pr... <Preview truncated at 128 characters>	mitochondrion;lysosome;lysosome;lysosome;melanosome;mitochondrion;endosome;nucleus;membrane;cytoplasm;
SLC39A7	OLIGO_09442				2.24													solute carrier family 39 (zinc transporter), member 7	BF041712	metal ion transmembrane transporter activity;	metal ion transport;transmembrane transport;	<31x31 double>
CRIP1	OLIGO_06439		-1.5				-1.75	-1.57	-3.24									cysteine-rich protein 1 (intestinal)	BF041729	zinc ion binding;metal ion binding;
BID	OLIGO_11475				-1.7				-1.58									BH3 interacting domain death agonist	BF041733
HADH	OLIGO_06440								-1.89									hydroxyacyl-Coenzyme A dehydrogenase (EC:1.1.1.35)	BF041769	catalytic activity;3-hydroxyacyl-CoA dehydrogenase activity;binding;oxidoreductase activity;oxidoreductase activity;oxidoreducta... <Preview truncated at 128 characters>	fatty acid metabolic process;fatty acid metabolic process;fatty acid metabolic process;metabolic process;response to hormone sti... <Preview truncated at 128 characters>	mitochondrion;mitochondrial inner membrane;cell surface;cell surface;cell surface;spliceosomal complex;
ABHD13	OLIGO_04554								1.56										BF041780
NAPRT1	OLIGO_08505				-1.74													nicotinate phosphoribosyltransferase domain containing 1	BF041781	nicotinate phosphoribosyltransferase activity;nicotinate phosphoribosyltransferase activity;transferase activity;transferase act... <Preview truncated at 128 characters>	pyridine nucleotide biosynthetic process;pyridine nucleotide biosynthetic process;pyridine nucleotide biosynthetic process;	cytoplasm;cytosol;
PEPD	OLIGO_11448								-1.78									peptidase D	BF041804	aminopeptidase activity;peptidase activity;metalloexopeptidase activity;hydrolase activity;manganese ion binding;metal ion bindi... <Preview truncated at 128 characters>	proteolysis;cellular process;
Cebpd	OLIGO_11528						2.76	3.25	3.23				1.74	2.91	2.67	2.58			BF041807	DNA binding;transcription factor activity;transcription factor activity;sequence-specific DNA binding;sequence-specific DNA bind... <Preview truncated at 128 characters>	transcription;regulation of transcription, DNA-dependent;regulation of transcription, DNA-dependent;regulation of transcription;	nucleus;nucleus;nucleus;
ICAM1	OLIGO_04474						1.81	1.93	2.99		1.88							intercellular adhesion molecule 1	BF041823	integrin binding;protein binding;	T cell activation via T cell receptor contact with antigen bound to MHC molecule on antigen presenting cell;T cell antigen proce... <Preview truncated at 128 characters>	immunological synapse;extracellular space;cytoplasm;external side of plasma membrane;membrane;membrane;membrane;membrane;integra... <Preview truncated at 128 characters>
C8ORF4	OLIGO_04470							1.65	1.85										BF041835
NPR1	OLIGO_09178				1.67													natriuretic peptide receptor A/guanylate cyclase A (atrionatriuretic peptide receptor A)	BF041845	peptide receptor activity, G-protein coupled;protein binding;	regulation of blood pressure;negative regulation of angiogenesis;diuresis;natriuresis;negative regulation of cell growth;regulat... <Preview truncated at 128 characters>	integral to plasma membrane;extracellular region;
MTHFD1L	OLIGO_04973				1.74													methylenetetrahydrofolate dehydrogenase (NADP+ dependent) 1-like (EC:6.3.4.3)	BF041860	nucleotide binding;catalytic activity;catalytic activity;catalytic activity;catalytic activity;formate-tetrahydrofolate ligase a... <Preview truncated at 128 characters>	one-carbon metabolic process;metabolic process;folic acid and derivative biosynthetic process;folic acid and derivative biosynth... <Preview truncated at 128 characters>	mitochondrion;mitochondrion;mitochondrion;
CD14	OLIGO_09336							1.69										CD14 molecule	BF041869	lipopolysaccharide binding;lipoteichoic acid binding;lipopolysaccharide binding;lipoteichoic acid binding;lipopolysaccharide bin... <Preview truncated at 128 characters>	response to molecule of bacterial origin;inflammatory response;response to lipopolysaccharide;positive regulation of tumor necro... <Preview truncated at 128 characters>	plasma membrane;plasma membrane;membrane;anchored to membrane;membrane raft;membrane raft;membrane raft;
IFIT2	OLIGO_04080								1.63									interferon-induced protein with tetratricopeptide repeats 2	BF041946	binding;calmodulin binding;binding;	biological_process;	cellular_component;
LOC507402	OLIGO_04083					1.63		1.59	1.5				1.61						BF041953
LMBR1	OLIGO_09199						1.5											limb region 1	BF041985		embryonic digit morphogenesis;muscle organ development;
FLJ12886	OLIGO_04914								1.71										BF042008
CDKN1C	OLIGO_10793			-1.81			-1.5											cyclin-dependent kinase inhibitor 1C (p57, Kip2)	BF042053	cyclin-dependent protein kinase inhibitor activity;protein binding;protein binding;kinase activity;transcription activator activ... <Preview truncated at 128 characters>	negative regulation of transcription from RNA polymerase II promoter;cell cycle arrest;positive regulation of transforming growt... <Preview truncated at 128 characters>	nucleus;nucleus;nucleus;cytoplasm;
RHPN2	OLIGO_04423								1.6									rhophilin, Rho GTPase binding protein 2	BF042073	protein binding;	signal transduction;signal transduction;	intracellular;intracellular;cytoplasm;perinuclear region of cytoplasm;
ATP6V1E1	OLIGO_07150				1.76				1.66									VATPase, H+ transporting, lysosomal V1 subunit E1	BF042098	protein binding;hydrogen-exporting ATPase activity, phosphorylative mechanism;hydrolase activity;proton-transporting ATPase acti... <Preview truncated at 128 characters>	transport;ion transport;ATP synthesis coupled proton transport;ATP hydrolysis coupled proton transport;proton transport;ATP synt... <Preview truncated at 128 characters>	cytoplasm;mitochondrion;endosome;endosome;cytosol;cytosol;apical plasma membrane;apical plasma membrane;proton-transporting two-... <Preview truncated at 128 characters>
ALDH3B2	OLIGO_09296				-2.17				-1.6									aldehyde dehydrogenase 3 family, member B2	BF042117	oxidoreductase activity;aldehyde dehydrogenase [NAD(P)+] activity;	cellular aldehyde metabolic process;metabolic process;oxidation reduction;	cellular_component;
Peli1	OLIGO_04079						1.56	1.78	1.9					1.5				pellino 1	BF042148	ubiquitin-protein ligase activity;protein binding;	positive regulation of cytokine production;positive regulation of B cell proliferation;positive regulation of protein ubiquitina... <Preview truncated at 128 characters>
NMT1	OLIGO_08868				1.52	1.51												N-myristoyltransferase 1	BF042177	glycylpeptide N-tetradecanoyltransferase activity;glycylpeptide N-tetradecanoyltransferase activity;glycylpeptide N-tetradecanoy... <Preview truncated at 128 characters>	in utero embryonic development;N-terminal protein myristoylation;N-terminal protein myristoylation;in utero embryonic developmen... <Preview truncated at 128 characters>	cytoplasm;cytoplasm;
EPHX2	OLIGO_09103				-1.76													epoxide hydrolase 2, cytoplasmic (EC:3.3.2.3)	BF042203	catalytic activity;catalytic activity;hydrolase activity;epoxide hydrolase activity;protein binding;interleukin-6 receptor bindi... <Preview truncated at 128 characters>	metabolic process;oxygen and reactive oxygen species metabolic process;xenobiotic metabolic process;cellular calcium ion homeost... <Preview truncated at 128 characters>	soluble fraction;cytosol;apical plasma membrane;actin cytoskeleton;cytoplasm;
Ciz1	OLIGO_04839				1.67			-1.64	2.08			1.55				3.08		CDKN1A interacting zinc finger protein 1	BF042209		DNA methylation;	nucleus;
RWDD1	OLIGO_06594				1.6													RWD domain containing 1	BF042283
GFER	OLIGO_04344				1.58													growth factor, augmenter of liver regeneration (ERV1 homolog, S. cerevisiae)	BF042305	protein binding;	spermatogenesis;lamellipodium assembly;wound healing, spreading of epidermal cells;	focal adhesion;lamellipodium;
NSUN5	OLIGO_09020				-2.12														BF042364
CDKN1A	OLIGO_09327							1.92	1.97									cyclin-dependent kinase inhibitor 1A (p21, Cip1)	BF042382	cyclin-dependent protein kinase inhibitor activity;cyclin-dependent protein kinase inhibitor activity;cyclin binding;	G1/S transition of mitotic cell cycle;G2/M transition of mitotic cell cycle;response to DNA damage stimulus;DNA damage response,... <Preview truncated at 128 characters>	cyclin-dependent protein kinase holoenzyme complex;cyclin-dependent protein kinase holoenzyme complex;nucleus;nucleus;nucleus;cy... <Preview truncated at 128 characters>
ARHGDIB	OLIGO_09353				1.54	1.54												Rho GDP dissociation inhibitor (GDI) beta	BF042389	Rho GDP-dissociation inhibitor activity;GTPase activator activity;protein binding;		cytoplasm;cytoplasm;cytoplasm;
HSD17B11	OLIGO_08960			1.81	-2.07				-1.87									hydroxysteroid (17-beta) dehydrogenase 11	BF042402	catalytic activity;binding;steroid dehydrogenase activity;oxidoreductase activity;oxidoreductase activity;oxidoreductase activit... <Preview truncated at 128 characters>	androgen catabolic process;metabolic process;metabolic process;metabolic process;oxidation reduction;oxidation reduction;	nucleus;cytoplasm;
LOC538648	OLIGO_11640				-1.79				-1.51										BF042589
UBE2L6	OLIGO_08721				-2.4													ubiquitin-conjugating enzyme E2L 6	BF042633	nucleotide binding;ubiquitin-protein ligase activity;protein binding;ATP binding;ligase activity;small conjugating protein ligas... <Preview truncated at 128 characters>	post-translational protein modification;regulation of protein metabolic process;
LOC506569	OLIGO_04272				1.73														BF042688	receptor binding;receptor binding;protein binding;identical protein binding;protein binding;	cell migration;establishment or maintenance of cell polarity;cell differentiation;central nervous system development;cell fate s... <Preview truncated at 128 characters>	nucleoplasm;
IGFBP3	OLIGO_10383							2.42	2.84	1.54			1.72					insulin-like growth factor binding protein 3	BF042727	insulin-like growth factor binding;insulin-like growth factor binding;insulin-like growth factor binding;insulin-like growth fac... <Preview truncated at 128 characters>	regulation of cell growth;osteoblast differentiation;positive regulation of apoptosis;positive regulation of myoblast differenti... <Preview truncated at 128 characters>	extracellular region;extracellular region;extracellular region;extracellular region;extracellular region;extracellular region;ex... <Preview truncated at 128 characters>
UEVLD	OLIGO_04774				2.6														BF042752	catalytic activity;catalytic activity;binding;oxidoreductase activity;oxidoreductase activity;oxidoreductase activity, acting on... <Preview truncated at 128 characters>	carbohydrate metabolic process;glycolysis;protein modification process;metabolic process;protein transport;post-translational pr... <Preview truncated at 128 characters>
OPLAH	OLIGO_11438				-1.8													5-oxoprolinase (ATP-hydrolysing)	BF042792	nucleotide binding;catalytic activity;ATP binding;hydrolase activity;hydrolase activity;5-oxoprolinase (ATP-hydrolyzing) activit... <Preview truncated at 128 characters>
LOC504650	OLIGO_04276							1.71											BF042816	transferase activity;phosphotransferase activity, for other substituted phosphate groups;ethanolaminephosphotransferase activity... <Preview truncated at 128 characters>	phospholipid biosynthetic process;lipid metabolic process;positive regulation of cell migration;inflammatory response;positive r... <Preview truncated at 128 characters>	endoplasmic reticulum membrane;membrane;vesicle;
MBD4	OLIGO_04284				-1.66													methyl-CpG binding domain protein 4	BF042829	DNA binding;DNA binding;DNA binding;catalytic activity;protein binding;	DNA repair;base-excision repair;response to DNA damage stimulus;DNA damage response, signal transduction resulting in induction ... <Preview truncated at 128 characters>	chromatin;nucleus;nucleus;nucleus;cytoplasm;
HRSP12	OLIGO_04282						1.63	1.62	2.01									heat-responsive protein 12	BF042842	nuclease activity;endonuclease activity;hydrolase activity;protein binding;cytoskeletal protein binding;	regulation of translational termination;regulation of translational termination;cytoskeleton organization;signal transduction;	mitochondrion;nucleus;cytoplasm;nucleus;cytoplasm;nucleus;cytoplasm;intermediate filament;
NOMO1	OLIGO_04723								-1.75									NODAL modulator 1	BF042913	carbohydrate binding;carbohydrate binding;	biological_process;biological_process;	cellular_component;cellular_component;
STAT1	OLIGO_09339							2.61	1.8						1.82	2.06		signal transducer and activator of transcription 1, 91kDa	BF042916	transcription factor activity;transcription factor activity;transcription factor activity;transcription factor activity;transcri... <Preview truncated at 128 characters>	regulation of transcription, DNA-dependent;regulation of transcription, DNA-dependent;regulation of transcription, DNA-dependent... <Preview truncated at 128 characters>	nucleus;nucleus;nucleus;nucleus;nucleus;nucleus;nucleolus;cytoplasm;cytoplasm;nucleus;nucleus;nucleus;nucleus;nucleus;nucleus;nu... <Preview truncated at 128 characters>
Fhad1	OLIGO_08751							-1.83							-1.52			forkhead-associated (FHA) phosphopeptide binding domain 1	BF042927
Ccrn4l	OLIGO_06344						1.78	1.66	1.98				1.54			1.59		CCR4 carbon catabolite repression 4-like (S. cerevisiae)	BF042937
PHF13	OLIGO_04235				-1.69				-1.85										BF042972	protein binding;zinc ion binding;	biological_process;	cellular_component;
LOC785419	OLIGO_04236				-1.52						1.7					-1.52			BF042975
BTG2	OLIGO_04233						1.7	2.34	3.31		1.51		1.69			1.67		BTG family, member 2	BF043020	protein binding;protein binding;protein binding;antigen binding;MHC class II protein binding;transmembrane receptor activity;pro... <Preview truncated at 128 characters>	response to mechanical stimulus;cell surface receptor linked signaling pathway;positive regulation of natural killer cell mediat... <Preview truncated at 128 characters>	external side of plasma membrane;nucleus;
ETF1	OLIGO_05080							1.69	1.7									eukaryotic translation termination factor 1	BF043054	protein binding;translation release factor activity, codon specific;	translation;translational termination;protein amino acid methylation;	cytoplasm;cytoplasm;cytoplasm;
SAT1	OLIGO_07102							1.92	3.2									spermidine/spermine N1-acetyl transferase 1	BF043097	diamine N-acetyltransferase activity;N-acetyltransferase activity;acyltransferase activity;transferase activity;	metabolic process;	cytoplasm;cytoplasm;
Gstk1	OLIGO_09310				-1.82				-1.56		1.67				-1.55			glutathione S-transferase kappa 1	BF043099	glutathione transferase activity;glutathione peroxidase activity;protein disulfide oxidoreductase activity;transferase activity;	glutathione metabolic process;	mitochondrion;mitochondrial inner membrane;outer membrane-bounded periplasmic space;
EPPB9	OLIGO_09082				1.53													B9 protein domain 1	BF043136
PAIP2	OLIGO_06820		-1.54	1.57	-1.93													polyadenylate-binding protein-interacting protein 2	BF043165	protein binding;translation repressor activity;	regulation of translation;negative regulation of translational initiation;	cytoplasm;cytoplasm;cytoplasm;
PDIA3	OLIGO_05982		-1.5		-1.61														BF043169	protein disulfide isomerase activity;protein binding;isomerase activity;isomerase activity;isomerase activity;protein binding;is... <Preview truncated at 128 characters>	positive regulation of apoptosis;positive regulation of apoptosis;cell redox homeostasis;cell redox homeostasis;cell redox homeo... <Preview truncated at 128 characters>	endoplasmic reticulum;endoplasmic reticulum;endoplasmic reticulum;endoplasmic reticulum;endoplasmic reticulum lumen;melanosome;e... <Preview truncated at 128 characters>
EGLN2	OLIGO_08734				-1.99													EGL nine homolog 2 (C. elegans)	BF043200	iron ion binding;oxidoreductase activity;oxidoreductase activity, acting on paired donors, with incorporation or reduction of mo... <Preview truncated at 128 characters>	response to hypoxia;cell redox homeostasis;positive regulation of protein catabolic process;oxidation reduction;	nucleus;
TRMT1	OLIGO_05084			1.93	-2.65													tRNA 5-methylaminomethyl-2-thiouridylate methyltransferase	BF043207	nucleic acid binding;RNA binding;tRNA (guanine-N2-)-methyltransferase activity;zinc ion binding;metal ion binding;tRNA (guanine-... <Preview truncated at 128 characters>	tRNA processing;tRNA processing;	cellular_component;
LOC615412	OLIGO_04584						-1.65												BF043242
TMEM170	OLIGO_04586				1.62				1.56										BF043264
NIPSNAP1	OLIGO_09529							-1.55										nipsnap homolog 1 (C. elegans)	BF043361			mitochondrion;
LOC786644	OLIGO_05010						-1.87												BF043445
AMOT	OLIGO_08392				1.74													angiomotin	BF043489
TMBIM1	OLIGO_04598							1.62										transmembrane BAX inhibitor motif containing 1	BF043501
S100A2	OLIGO_08414				2.27		1.54	2	5.16						1.67	2.43			BF043546	calcium ion binding;calcium ion binding;
BZW2	OLIGO_08987				1.92				1.63									basic leucine zipper and W2 domains 2	BF043615	binding;protein binding;protein binding;	positive regulation of macrophage derived foam cell differentiation;	soluble fraction;
TMEM16H	OLIGO_04523				-1.7						1.61								BF043688
LOC519739	OLIGO_04525								2.04										BF043705
STAT1	OLIGO_06420						1.78	2.21	2.62					2.03	1.53	1.82		signal transducer and activator of transcription 1, 91kDa	BF043726	transcription factor activity;transcription factor activity;transcription factor activity;transcription factor activity;transcri... <Preview truncated at 128 characters>	regulation of transcription, DNA-dependent;regulation of transcription, DNA-dependent;regulation of transcription, DNA-dependent... <Preview truncated at 128 characters>	nucleus;nucleus;nucleus;nucleus;nucleus;nucleus;nucleolus;cytoplasm;cytoplasm;nucleus;nucleus;nucleus;nucleus;nucleus;nucleus;nu... <Preview truncated at 128 characters>
Gabarapl1	OLIGO_09036				1.59			1.61	2.19				1.54			2.63		GABA(A) receptor-associated protein like 1	BF043830			cytoplasm;cytoplasm;endoplasmic reticulum;endoplasmic reticulum;Golgi apparatus;Golgi apparatus;microtubule;membrane;membrane;
PSPH	OLIGO_06449				1.71			1.72	2.21				1.52	1.54		1.85		phosphoserine phosphatase	BF043883	catalytic activity;phosphoserine phosphatase activity;phosphoserine phosphatase activity;phosphoserine phosphatase activity;prot... <Preview truncated at 128 characters>	L-serine biosynthetic process;L-serine biosynthetic process;metabolic process;metabolic process;cellular amino acid biosynthetic... <Preview truncated at 128 characters>
BT.1489	OLIGO_06472				-1.69	-1.82													BF043897	triglyceride lipase activity;	lipid metabolic process;
B4galt1	OLIGO_08625						1.51	1.84	1.77					1.56		1.55		UDP-Gal:betaGlcNAc beta 1,4- galactosyltransferase, polypeptide 1	BF043934	beta-N-acetylglucosaminylglycopeptide beta-1,4-galactosyltransferase activity;beta-N-acetylglucosaminylglycopeptide beta-1,4-gal... <Preview truncated at 128 characters>	epithelial cell development;acute inflammatory response;carbohydrate metabolic process;lactose biosynthetic process;galactose me... <Preview truncated at 128 characters>	Golgi trans cisterna;Golgi trans cisterna;extracellular region;extracellular region;Golgi apparatus;Golgi apparatus;Golgi appara... <Preview truncated at 128 characters>
CCL2	OLIGO_07917			1.65		1.87	3.7	6.03	17.24	1.59	2.09		2.39	2.08	3.67	2.09		chemokine (C-C motif) ligand 2	BF043950	G-protein-coupled receptor binding;cytokine activity;protein binding;chemokine activity;chemokine activity;G-protein-coupled rec... <Preview truncated at 128 characters>	monocyte chemotaxis;anti-apoptosis;chemotaxis;immune response;immune response;response to bacterium;macrophage chemotaxis;monocy... <Preview truncated at 128 characters>	extracellular region;extracellular region;extracellular space;extracellular space;extracellular region;extracellular region;extr... <Preview truncated at 128 characters>
CLDND1	OLIGO_04886							1.56											BF043957	molecular_function;	biological_process;	membrane;integral to membrane;membrane;
C1ORF172	OLIGO_04893								-2.23									chromosome 1 open reading frame 172	BF043991
Rnf149	OLIGO_09431								1.89							1.69			BF044113	SH3/SH2 adaptor activity;identical protein binding;protein binding;zinc ion binding;	biological_process;	cellular_component;
RNF141	OLIGO_04906				-2.08			-1.58	-1.71									ring finger protein 141	BF044143	DNA binding;protein binding;zinc ion binding;metal ion binding;	regulation of transcription, DNA-dependent;
LOC517135	OLIGO_04905				-1.91														BF044145
MAPK3	OLIGO_11149				-1.65				-1.59									mitogen-activated protein kinase 3	BF044152	ubiquitin binding;electron carrier activity;protein binding;protein binding;procollagen-proline 4-dioxygenase activity;phosphati... <Preview truncated at 128 characters>	anti-apoptosis;fatty acid metabolic process;immune response;peptidyl-proline hydroxylation to 4-hydroxy-L-proline;phosphatidylin... <Preview truncated at 128 characters>	plasma membrane;nucleus;plasma membrane;insoluble fraction;soluble fraction;contractile fiber;proteasome complex;mitochondrion;p... <Preview truncated at 128 characters>
Stk40	OLIGO_04012							1.68	1.5						1.76	2			BF044278	nucleotide binding;protein kinase activity;protein kinase activity;protein serine/threonine kinase activity;protein serine/threo... <Preview truncated at 128 characters>	protein amino acid phosphorylation;protein amino acid phosphorylation;protein amino acid phosphorylation;	nucleus;nucleus;cytoplasm;cytoplasm;
PFDN4	OLIGO_04011						-2.11		-2.25									prefoldin subunit 4	BF044280	unfolded protein binding;protein binding;	protein folding;protein folding;regulation of transcription from RNA polymerase II promoter involved in spinal cord association ... <Preview truncated at 128 characters>	prefoldin complex;cytosol;transcription factor complex;
RXRB	OLIGO_09390		1.65															retinoid X receptor, beta	BF044296	DNA binding;DNA binding;transcription factor activity;transcription factor activity;transcription factor activity;steroid hormon... <Preview truncated at 128 characters>	transcription;regulation of transcription, DNA-dependent;regulation of transcription, DNA-dependent;regulation of transcription,... <Preview truncated at 128 characters>	nucleus;nucleus;nucleus;nucleus;nucleus;nucleus;nucleus;nucleus;nucleus;nucleus;
GSR	OLIGO_06074							1.51	1.87									glutathione reductase (EC:1.6.4.2)	BF044300	glutathione-disulfide reductase activity;NADP or NADPH binding;FAD binding;glutathione-disulfide reductase activity;oxidoreducta... <Preview truncated at 128 characters>	spermatogenesis;negative regulation of cell proliferation;negative regulation of apoptosis;alpha-beta T cell differentiation;T c... <Preview truncated at 128 characters>	soluble fraction;cytosol;mitochondrion;intracellular;nucleus;cytoplasm;
Plscr1	OLIGO_04831						1.82	3.03	2.7				1.92		1.94	2.14			BF044304
NADK	OLIGO_11577				-1.65													NAD kinase	BF044308	NAD+ kinase activity;NAD+ kinase activity;NAD+ kinase activity;NAD+ kinase activity;kinase activity;	metabolic process;metabolic process;metabolic process;metabolic process;
LILRA3	OLIGO_09394								2.5										BF044309
FAM49B	OLIGO_04826								1.55										BF044372
LOC509304	OLIGO_04337				-1.62														BF044415
SSBP1	OLIGO_04330				-1.64													single-stranded DNA binding protein 1	BF044515	DNA binding;single-stranded DNA binding;single-stranded DNA binding;	DNA replication;DNA replication;positive regulation of helicase activity;mitochondrion morphogenesis;	mitochondrion;mitochondrion;mitochondrion;mitochondrion;mitochondrial nucleoid;
NFKBIB	OLIGO_06272								1.56									nuclear factor of kappa light polypeptide gene enhancer in B-cells inhibitor, beta	BF044586	protein binding;
TXNDC5	OLIGO_09307				-1.65													thioredoxin domain containing 5	BF044616
PTPN2	OLIGO_04760						1.63	1.6	1.96				1.56					protein tyrosine phosphatase, non-receptor type 2	BF044640	phosphoprotein phosphatase activity;protein tyrosine phosphatase activity;protein tyrosine phosphatase activity;protein tyrosine... <Preview truncated at 128 characters>	protein amino acid dephosphorylation;protein amino acid dephosphorylation;protein amino acid dephosphorylation;insulin receptor ... <Preview truncated at 128 characters>
CCDC104	OLIGO_06358							-1.66											BF044663
MAT2A	OLIGO_04766							1.56										methionine adenosyltransferase II, alpha	BF044672	nucleotide binding;magnesium ion binding;methionine adenosyltransferase activity;methionine adenosyltransferase activity;methion... <Preview truncated at 128 characters>	S-adenosylmethionine biosynthetic process;one-carbon metabolic process;one-carbon metabolic process;one-carbon metabolic process... <Preview truncated at 128 characters>	cytoplasm;
NDUFA7	OLIGO_08735				-2.24													NADH dehydrogenase (ubiquinone) 1 alpha subcomplex, 7, 14.5kDa	BF044713	NADH dehydrogenase (ubiquinone) activity;oxidoreductase activity;	mitochondrial electron transport, NADH to ubiquinone;mitochondrial electron transport, NADH to ubiquinone;transport;electron tra... <Preview truncated at 128 characters>	mitochondrion;mitochondrion;mitochondrion;mitochondrial inner membrane;mitochondrial inner membrane;mitochondrial inner membrane... <Preview truncated at 128 characters>
VPS4A	OLIGO_03998				1.66													vacuolar protein sorting 4a (yeast)	BF044714	nucleotide binding;nucleotide binding;ATP binding;ATP binding;protein C-terminus binding;nucleoside-triphosphatase activity;prot... <Preview truncated at 128 characters>	cytokinesis;endosome transport;	ESCRT III complex;cytoplasm;cytoplasm;midbody;perinuclear region of cytoplasm;perinuclear region of cytoplasm;
DNAJA2	OLIGO_06279						1.68		1.57									DnaJ (Hsp40) homolog, subfamily A, member 2	BF044731	ATP binding;heat shock protein binding;heat shock protein binding;heat shock protein binding;heat shock protein binding;metal io... <Preview truncated at 128 characters>	protein folding;protein folding;protein folding;protein folding;protein folding;response to heat;protein folding;protein folding... <Preview truncated at 128 characters>	<31x31 double>
NFKBIZ	OLIGO_03996				-2.02				-1.62									nuclear factor of kappa light polypeptide gene enhancer in B-cells inhibitor, zeta	BF044744		transcription;inflammatory response;regulation of transcription;	nucleus;nucleus;nucleus;
PTPRG	OLIGO_06233			1.59	-1.55				-1.64									protein tyrosine phosphatase, receptor type, G (EC:3.1.3.48)	BF044748
TIMM22	OLIGO_04712						1.63		-1.53									translocase of inner mitochondrial membrane 22 homolog (yeast)	BF044778	protein binding;protein transporter activity;	transport;protein transport;protein transport;transmembrane transport;	mitochondrion;mitochondrion;mitochondrial inner membrane;mitochondrial inner membrane;mitochondrial inner membrane;membrane;inte... <Preview truncated at 128 characters>
CHD8	OLIGO_07636		1.73		1.59													chromodomain helicase DNA binding protein 8	BF044830	transcription activator activity;	morphogenesis of an epithelium;cardiac muscle cell differentiation;
PX19	OLIGO_10443				-1.76														BF044858		regulation of smooth muscle contraction;	mitochondrion;mitochondrion;mitochondrion;cytoplasm;sarcomere;contractile fiber;
CYP4A11	OLIGO_10872				1.53	1.54			-1.69	1.55	1.54	1.61	1.74					cytochrome P450, family 4, subfamily A, polypeptide 11	BF044888	monooxygenase activity;monooxygenase activity;monooxygenase activity;iron ion binding;iron ion binding;electron carrier activity... <Preview truncated at 128 characters>	oxidation reduction;oxidation reduction;
SIN3B	OLIGO_09010			2.19	-3.33													transcriptional regulator, SIN3B (yeast)	BF044910
C2ORF30	OLIGO_09000				1.64														BF044941
ZNF407	OLIGO_09008				-1.7														BF044943
BNIP1	OLIGO_04223				-1.65													BCL2/adenovirus E1B 19kDa interacting protein 1	BF044949
Ppp1r16a	OLIGO_11547				-2.65	-1.58	1.83		-2.15		2.08			1.81				protein phosphatase 1, regulatory (inhibitor) subunit 16A	BF045030	protein binding;protein binding;	anion transport;
RNF214	OLIGO_04651			-1.6	1.57														BF045073	protein binding;zinc ion binding;protein binding;zinc ion binding;	biological_process;biological_process;	cellular_component;cellular_component;
INPP4B	OLIGO_04153								1.51									inositol polyphosphate-4-phosphatase, type II, 105kDa	BF045124		signal transduction;mRNA cleavage;	nucleolar ribonuclease P complex;
BF045162	OLIGO_05072				-1.68														BF045162
MGC139923	OLIGO_09931				-1.67														BF045219
SNRPA	OLIGO_09255				1.59													small nuclear ribonucleoprotein polypeptide A	BF045266	growth factor activity;		extracellular region;extracellular region;
BF045344	OLIGO_09844				2.56		-1.56		1.93										BF045344
BOLA-DRB3	OLIGO_09334				-2.41													major histocompatibility complex, class II, DRB3	BF045350		antigen processing and presentation of peptide or polysaccharide antigen via MHC class II;immune response;antigen processing and... <Preview truncated at 128 characters>	membrane;integral to membrane;MHC class II protein complex;MHC class II protein complex;membrane;integral to membrane;MHC class ... <Preview truncated at 128 characters>
FBXO17	OLIGO_04999				-2.24													F-box protein 17	BF045351	protein binding;	protein catabolic process;
Rbak	OLIGO_05002				-1.69						1.51				-1.54			RB-associated KRAB repressor	BF045373
EHF	OLIGO_08623							1.71	2.16									ets homologous factor	BF045427	DNA binding;transcription factor activity;transcription factor activity;protein binding;sequence-specific DNA binding;sequence-s... <Preview truncated at 128 characters>	transcription;regulation of transcription, DNA-dependent;epithelial cell differentiation;regulation of transcription;positive re... <Preview truncated at 128 characters>	nucleus;nucleus;nucleus;
LOC506267	OLIGO_06518						1.56												BF045453
FUCA1	OLIGO_05001								-2.73									fucosidase, alpha-L- 1, tissue	BF045505	catalytic activity;alpha-L-fucosidase activity;alpha-L-fucosidase activity;alpha-L-fucosidase activity;alpha-L-fucosidase activi... <Preview truncated at 128 characters>	carbohydrate metabolic process;carbohydrate metabolic process;carbohydrate metabolic process;fucose metabolic process;metabolic ... <Preview truncated at 128 characters>	lysosome;lysosome;cytoplasm;
LOC783770	OLIGO_04510				-1.63														BF045558
AGPAT7	OLIGO_09052								1.98				1.63			1.79		1-acylglycerol-3-phosphate O-acyltransferase 7 (lysophosphatidic acid acyltransferase, eta)	BF045562	calcium ion binding;acyltransferase activity;acyltransferase activity;transferase activity;	metabolic process;
LOC508105	OLIGO_04515								1.55										BF045605
RBM16	OLIGO_09223				-1.63														BF045614
CCBP2	OLIGO_06444							1.58										chemokine binding protein 2	BF045645	signal transducer activity;receptor activity;G-protein coupled receptor activity;protein binding;C-C chemokine receptor activity... <Preview truncated at 128 characters>	signal transduction;signal transduction;G-protein coupled receptor protein signaling pathway;G-protein coupled receptor protein ... <Preview truncated at 128 characters>	membrane;integral to membrane;integral to membrane;integral to membrane;membrane;integral to membrane;integral to membrane;integ... <Preview truncated at 128 characters>
HAP1	OLIGO_06461				-1.65	-1.5												huntingtin-associated protein 1	BF045655
ANPEP	OLIGO_08334			1.89	-2.82			-2.78	-15.85									alanyl (membrane) aminopeptidase (aminopeptidase N, aminopeptidase M, microsomal aminopeptidase, CD1	BF045684	aminopeptidase activity;aminopeptidase activity;peptidase activity;metallopeptidase activity;metallopeptidase activity;zinc ion ... <Preview truncated at 128 characters>	angiogenesis;proteolysis;multicellular organismal development;cell differentiation;	ER-Golgi intermediate compartment;membrane;membrane;integral to membrane;
LOC520039	OLIGO_04938				1.8														BF045690
COL4A1	OLIGO_09395								1.54									collagen, type IV, alpha 1	BF045718	extracellular matrix structural constituent;binding;protein binding;platelet-derived growth factor binding;		extracellular region;proteinaceous extracellular matrix;collagen;collagen type IV;basement membrane;basement membrane;extracellu... <Preview truncated at 128 characters>
TIMP1	OLIGO_08931							2.62	4.34							2.45		TIMP metallopeptidase inhibitor 1	BF045724	enzyme inhibitor activity;protein binding;metalloendopeptidase inhibitor activity;metalloendopeptidase inhibitor activity;metal ... <Preview truncated at 128 characters>	erythrocyte maturation;	extracellular region;extracellular region;proteinaceous extracellular matrix;basement membrane;
CTSB	OLIGO_10377							1.66										cathepsin B	BF045821	cysteine-type endopeptidase activity;cysteine-type endopeptidase activity;cysteine-type endopeptidase activity;peptidase activit... <Preview truncated at 128 characters>	proteolysis;proteolysis;proteolysis;regulation of catalytic activity;proteolysis;proteolysis;	mitochondrion;lysosome;lysosome;lysosome;melanosome;mitochondrion;lysosome;
CRB3	OLIGO_04954				-1.73													crumbs homolog 3 (Drosophila)	BF045843
CD44	OLIGO_09443				2.19													CD44 molecule (Indian blood group)	BF045864	receptor activity;binding;binding;hyaluronic acid binding;binding;binding;hyaluronic acid binding;	cell adhesion;cell adhesion;cell adhesion;cell adhesion;cell adhesion;	membrane;membrane;membrane;integral to membrane;membrane;
HOXD9	OLIGO_11437				-2.71				-2.04									homeo box D10	BF045946
Agxt2l2	OLIGO_08817				-2.48						1.83	-1.6		2.6					BF045955
GMPPB	OLIGO_04043				-1.51													GDP-mannose pyrophosphorylase B	BF045956	nucleotide binding;mannose-1-phosphate guanylyltransferase activity;GTP binding;transferase activity;transferase activity;transf... <Preview truncated at 128 characters>	biosynthetic process;	mitochondrion;
ANKRD1	OLIGO_08536								1.5		-1.57							ankyrin repeat domain 1 (cardiac muscle)	BF046005	transcription corepressor activity;protein binding;	regulation of transcription from RNA polymerase II promoter;	nucleus;nucleus;nucleus;transcription factor complex;cytoplasm;I band;
IL6	OLIGO_08326						1.77	1.59	5.06									interleukin 6 (interferon, beta 2)	BF046065	cytokine activity;cytokine activity;cytokine activity;interleukin-6 receptor binding;interleukin-6 receptor binding;protein bind... <Preview truncated at 128 characters>	neutrophil apoptosis;acute-phase response;immune response;immune response;endocrine pancreas development;defense response to pro... <Preview truncated at 128 characters>	extracellular region;extracellular region;extracellular region;extracellular region;extracellular space;extracellular space;exte... <Preview truncated at 128 characters>
MITF	OLIGO_09180				1.76													microphthalmia-associated transcription factor	BF046094	transcription regulator activity;transcription regulator activity;	regulation of transcription;regulation of transcription;	nucleus;
MGC11102	OLIGO_04450				-1.88														BF046097	RNA binding;RNA binding;translation initiation factor activity;translation initiation factor activity;	translational initiation;translational initiation;	nucleus;nucleus;
ALAS1	OLIGO_04454				1.53			1.54										aminolevulinate, delta-, synthase 1	BF046114	catalytic activity;5-aminolevulinate synthase activity;5-aminolevulinate synthase activity;acyltransferase activity;transferase ... <Preview truncated at 128 characters>	heme biosynthetic process;metabolic process;biosynthetic process;tetrapyrrole biosynthetic process;	mitochondrion;mitochondrion;mitochondrial matrix;
Lap3	OLIGO_10215							2.38	2.84						1.85	2.05		leucine aminopeptidase 3	BF046122	aminopeptidase activity;aminopeptidase activity;aminopeptidase activity;aminopeptidase activity;peptidase activity;peptidase act... <Preview truncated at 128 characters>	proteolysis;proteolysis;protein metabolic process;proteolysis;proteolysis;proteolysis;signal transduction;cell proliferation;epi... <Preview truncated at 128 characters>	intracellular;intracellular;cytoplasm;cytoplasm;cytoplasm;mitochondrion;mitochondrion;cytoplasm;cytoplasm;cytoplasm;integral to ... <Preview truncated at 128 characters>
Kcnk1	OLIGO_08830						1.63									1.62		potassium channel, subfamily K, member 1	BF046131	ion channel activity;voltage-gated ion channel activity;potassium channel activity;potassium channel activity;potassium channel ... <Preview truncated at 128 characters>	transport;ion transport;potassium ion transport;potassium ion transport;potassium ion transport;potassium ion transport;potassiu... <Preview truncated at 128 characters>	endosome;membrane;membrane;membrane;membrane;membrane;integral to membrane;integral to membrane;
MTHFD2	OLIGO_06376						1.5	1.93	1.66					1.54				methylenetetrahydrofolate dehydrogenase (NADP+ dependent) 2, methenyltetrahydrofolate cyclohydrolase	BF046156	magnesium ion binding;catalytic activity;catalytic activity;catalytic activity;catalytic activity;catalytic activity;catalytic a... <Preview truncated at 128 characters>	one-carbon metabolic process;metabolic process;folic acid and derivative biosynthetic process;folic acid and derivative biosynth... <Preview truncated at 128 characters>	mitochondrion;mitochondrion;mitochondrion;
MESDC2	OLIGO_06397				1.55													mesoderm development candidate 2	BF046291		Wnt receptor signaling pathway;	endoplasmic reticulum;endoplasmic reticulum;
ROCK2	OLIGO_11417				1.86													Rho-associated, coiled-coil containing protein kinase 2	BF046300	nucleotide binding;protein kinase activity;protein kinase activity;protein kinase activity;protein kinase activity;protein serin... <Preview truncated at 128 characters>	cytokinesis;protein amino acid phosphorylation;protein amino acid phosphorylation;protein amino acid phosphorylation;protein ami... <Preview truncated at 128 characters>	intracellular;cytoplasm;cytoplasm;cytosol;plasma membrane;plasma membrane;membrane;spindle pole centrosome;
IFI30	OLIGO_04819				-1.86		1.8	2.35										interferon gamma inducible protein 30	BF046359	enzyme binding;Ran GTPase binding;protein kinase binding;	antigen processing and presentation of exogenous peptide antigen via MHC class II;negative regulation of fibroblast proliferatio... <Preview truncated at 128 characters>	lysosome;lysosome;cytoplasm;
OAT	OLIGO_05989				-1.63			-2.45	-4.82						-2.07	-2.37		ornithine aminotransferase (gyrate atrophy)	BF046362	catalytic activity;ornithine-oxo-acid transaminase activity;protein binding;transaminase activity;transaminase activity;transami... <Preview truncated at 128 characters>		mitochondrion;mitochondrion;mitochondrial matrix;
PDE4D	OLIGO_04808						1.65	1.76					1.65					phosphodiesterase 4D, cAMP-specific (phosphodiesterase E3 dunce homolog, Drosophila) (EC:3.1.4.17)	BF046404	3,5-cyclic-AMP phosphodiesterase activity;3,5-cyclic-AMP phosphodiesterase activity;	cAMP catabolic process;smooth muscle contraction;	soluble fraction;insoluble fraction;soluble fraction;insoluble fraction;
ITGB4	OLIGO_09105				-2.78													integrin, beta 4	BF046410	receptor activity;binding;	cell communication;cell-matrix adhesion;cell adhesion;integrin-mediated signaling pathway;	integrin complex;integral to membrane;
VNN1	OLIGO_03993			1.5					-2.6		1.61					-1.96		vanin 1	BF046580	hydrolase activity;hydrolase activity, acting on carbon-nitrogen (but not peptide) bonds;hydrolase activity, acting on carbon-ni... <Preview truncated at 128 characters>	acute inflammatory response;chronic inflammatory response;nitrogen compound metabolic process;anti-apoptosis;pantothenate metabo... <Preview truncated at 128 characters>	plasma membrane;plasma membrane;membrane;anchored to membrane;
MAPK13	OLIGO_04252							1.81	1.64				1.98	1.53	1.65	1.84		mitogen-activated protein kinase 13	BF046665	nucleotide binding;protein kinase activity;protein kinase activity;protein kinase activity;protein serine/threonine kinase activ... <Preview truncated at 128 characters>	protein amino acid phosphorylation;protein amino acid phosphorylation;protein amino acid phosphorylation;protein amino acid phos... <Preview truncated at 128 characters>
BT.6525	OLIGO_04750				1.52														BF046703
MAP1B	OLIGO_12980							-1.78					-2.02		-1.5	1.95		microtubule-associated protein 1B	BF076903	cytoskeletal regulatory protein binding;structural molecule activity;molecular_function;	microtubule bundle formation;dendrite development;microtubule bundle formation;dendrite development;microtubule bundle formation... <Preview truncated at 128 characters>	cytosol;cytosol;cytosol;microtubule associated complex;microtubule associated complex;cellular_component;
LOC728216	OLIGO_08233							1.6											BF440165	ubiquitin thiolesterase activity;ubiquitin thiolesterase activity;	ubiquitin-dependent protein catabolic process;ubiquitin-dependent protein catabolic process;
BF440167	OLIGO_05248				1.64														BF440167
NFKBIA	OLIGO_08439			2.29		1.82		3.09	3.38		2.89	2.18	2.23	1.64	1.67	2.4		nuclear factor of kappa light polypeptide gene enhancer in B-cells inhibitor, alpha	BF440215
Klf4	OLIGO_05295		-1.5											1.65				Kruppel-like factor 4 (gut)	BF440263	nucleic acid binding;transcription factor activity;zinc ion binding;zinc ion binding;sequence-specific DNA binding;	epidermal cell differentiation;stem cell maintenance;post-embryonic camera-type eye development;response to retinoic acid;respon... <Preview truncated at 128 characters>	intracellular;intracellular;nucleus;
PON2	OLIGO_05328							-1.5										paraoxonase 2	BF440270	aryldialkylphosphatase activity;arylesterase activity;arylesterase activity;arylesterase activity;hydrolase activity;metal ion b... <Preview truncated at 128 characters>		extracellular region;membrane;membrane;extracellular region;
EIF1B	OLIGO_07265				1.75														BF440279	translation initiation factor activity;translation initiation factor activity;translation initiation factor activity;protein bin... <Preview truncated at 128 characters>	translation;translational initiation;
LMAN1	OLIGO_07323				-1.5													lectin, mannose-binding, 1	BF440294	DNA binding;		nucleus;ER-Golgi intermediate compartment;ER-Golgi intermediate compartment;Golgi apparatus;membrane;sarcomere;
IFIT5	OLIGO_07224							1.56	1.55									interferon-induced protein with tetratricopeptide repeats 5	BF440341	binding;
LGMN	OLIGO_08410							1.57	1.72									legumain	BF440354	cysteine-type endopeptidase activity;peptidase activity;cysteine-type peptidase activity;hydrolase activity;	proteolysis;	lysosome;lysosome;
IRF8	OLIGO_05242							1.91							1.77				BF440358	transcription factor activity;transcription factor activity;transcription factor activity;protein binding;	transcription;regulation of transcription, DNA-dependent;regulation of transcription, DNA-dependent;regulation of transcription,... <Preview truncated at 128 characters>	nucleus;nucleus;nucleus;nucleus;
BCL2A1	OLIGO_09113			1.6		1.64		3.02	3.09	1.59	1.89		1.87		2.23			BCL2-related protein A1	BF440414	protein binding;	apoptosis;regulation of apoptosis;regulation of apoptosis;regulation of apoptosis;regulation of apoptosis;	cytoplasm;cytoplasm;
GADD45B	OLIGO_11656							1.51	1.84									growth arrest and DNA-damage-inducible, beta	BF440435	protein binding;	activation of MAPKK activity;negative regulation of protein kinase activity;apoptosis;multicellular organismal development;cell ... <Preview truncated at 128 characters>
AHNAK	OLIGO_11458				-1.93													AHNAK nucleoprotein (desmoyokin) (AHNAK), transcript variant 1	BF440510
LOC652614	OLIGO_10329								-1.88									similar to HLA class I histocompatibility antigen, A-11 alpha chain precursor (MHC class I antigen A*11)	BF440519	molecular_function;	antigen processing and presentation of peptide antigen via MHC class I;immune response;immune response;immune response;antigen p... <Preview truncated at 128 characters>	membrane;membrane;membrane;membrane;integral to membrane;MHC class I protein complex;MHC class I protein complex;MHC class I pro... <Preview truncated at 128 characters>
IGJ	OLIGO_05299			1.84				2.96										immunoglobulin joining chain	BF440593
ADAM11	OLIGO_13154				-1.58	-1.58												a disintegrin and metallopeptidase domain 11	BF776559	integrin binding;protein binding;		plasma membrane;cytosol;voltage-gated calcium channel complex;
COL13A1	OLIGO_12808						-1.64											collagen, type XIII, alpha 1	BF889490
CSF3R	OLIGO_12572							1.9	1.63									colony stimulating factor 3 receptor (granulocyte)	BF889582
PRKAR1B	OLIGO_12435							-1.5										protein kinase, cAMP-dependent, regulatory, type I, beta	BG693032	cAMP-dependent protein kinase regulator activity;cAMP-dependent protein kinase regulator activity;cAMP-dependent protein kinase ... <Preview truncated at 128 characters>	regulation of protein amino acid phosphorylation;regulation of protein amino acid phosphorylation;signal transduction;regulation... <Preview truncated at 128 characters>	cAMP-dependent protein kinase complex;cAMP-dependent protein kinase complex;cAMP-dependent protein kinase complex;
UNC45A	OLIGO_12449		1.72		2.21													unc-45 homolog A (C. elegans)	BI535499	binding;binding;binding;protein binding;
TIFA	OLIGO_12965				1.53		1.83	2.69					1.67	2.37	2.42	2.3			BI540470	protein binding;	I-kappaB kinase/NF-kappaB cascade;
ZNF79	OLIGO_12963				-1.62					1.53	1.79							zinc finger protein 79	BI681788		nervous system development;
TOMM40	OLIGO_12455						-1.77											translocase of outer mitochondrial membrane 40 homolog (yeast)	BI683225	voltage-gated anion channel activity;	protein targeting to mitochondrion;protein targeting to mitochondrion;transport;anion transport;protein transport;transmembrane ... <Preview truncated at 128 characters>	integral to membrane of membrane fraction;mitochondrion;mitochondrion;mitochondrial outer membrane;mitochondrial outer membrane;... <Preview truncated at 128 characters>
CD1E	OLIGO_12844		1.57		1.92													CD1e molecule	BI898529		immune response;antigen processing and presentation;	<31x31 double>
LPPR2	OLIGO_12710				-1.51				-1.72										BM032276	catalytic activity;phosphatidate phosphatase activity;hydrolase activity;		membrane;membrane;membrane;integral to membrane;
ZNF524	OLIGO_12613				-1.69														BM088938
COX10	OLIGO_13081				-1.71				-1.8									COX10 homolog, cytochrome c oxidase assembly protein, heme A: farnesyltransferase (yeast)	BM257557	cytochrome-c oxidase activity;prenyltransferase activity;protoheme IX farnesyltransferase activity;protoheme IX farnesyltransfer... <Preview truncated at 128 characters>	mitochondrial fission;heme biosynthetic process;heme biosynthetic process;heme a biosynthetic process;heme a biosynthetic proces... <Preview truncated at 128 characters>	mitochondrion;mitochondrion;plasma membrane;membrane;integral to membrane;integral to membrane;mitochondrial membrane;mitochondr... <Preview truncated at 128 characters>
LOC534145	OLIGO_05520							1.64	2.22							1.58			BM361825
RPGR	OLIGO_05522				1.54													retinitis pigmentosa GTPase regulator	BM361838	RNA binding;structural constituent of ribosome;structural constituent of ribosome;structural constituent of ribosome;structural ... <Preview truncated at 128 characters>	translation;translation;translation;immune system process;purine nucleotide biosynthetic process;AMP biosynthetic process;anti-a... <Preview truncated at 128 characters>	intracellular;intracellular;ribosome;ribosome;ribosome;small ribosomal subunit;ribonucleoprotein complex;cytoplasm;integral to p... <Preview truncated at 128 characters>
TLR4	OLIGO_05523								1.55									toll-like receptor 4	BM361845	lipopolysaccharide receptor activity;lipopolysaccharide receptor activity;receptor activity;transmembrane receptor activity;tran... <Preview truncated at 128 characters>	activation of innate immune response;production of nitric oxide involved in inflammatory response;inflammatory response;immune r... <Preview truncated at 128 characters>	cytoplasm;plasma membrane;integral to plasma membrane;external side of plasma membrane;membrane;membrane;integral to membrane;in... <Preview truncated at 128 characters>
LOC534869	OLIGO_05519				1.6														BM361850			membrane fraction;
LOC348262	OLIGO_09351				1.59														BM361908
BT.34327	OLIGO_09594						1.88		-1.63										BM361930
LILRB2	OLIGO_09779							2.08	1.58										BM361940
MRPL28	OLIGO_05527				-3.06	-1.88	1.62				5.12		-2.09					mitochondrial ribosomal protein L28	BM361943	transcription factor activity;	regulation of transcription;	mitochondrion;mitochondrion;mitochondrion;ribosome;ribonucleoprotein complex;
TXNRD1	OLIGO_05532								2.34									thioredoxin reductase 1	BM362012	thioredoxin-disulfide reductase activity;thioredoxin-disulfide reductase activity;thioredoxin-disulfide reductase activity;oxido... <Preview truncated at 128 characters>	mesoderm formation;gastrulation;cell proliferation;cell redox homeostasis;cell redox homeostasis;oxidation reduction;oxidation r... <Preview truncated at 128 characters>	nucleus;cytoplasm;cytoplasm;cytoplasm;cytoplasm;mitochondrion;cytosol;
RFX5	OLIGO_05536			1.82	-2.02						3.32							regulatory factor X, 5 (influences HLA class II expression)	BM362040			cytoplasm;cytosol;mitochondrion;cytoplasm;
ZNF335	OLIGO_11196				1.91		-2.59												BM362077	zinc ion binding;	biological_process;	intracellular;
ABHD14A	OLIGO_05543				1.64														BM362155			nucleus;
RGS2	OLIGO_09600								2.21									regulator of G-protein signaling 2, 24kDa	BM362277	signal transducer activity;GTPase activator activity;calmodulin binding;GTPase activator activity;identical protein binding;ATPa... <Preview truncated at 128 characters>	cell cycle;spermatogenesis;negative regulation of signal transduction;brown fat cell differentiation;regulation of G-protein cou... <Preview truncated at 128 characters>	cell surface;cytoskeleton;
PDDC1	OLIGO_10719				-1.86	-1.74												Parkinson disease 7 domain containing 1	BM362340			extracellular region;extracellular region;
CXCL9	OLIGO_05563							1.67	3.44						1.59	2.08		chemokine (C-X-C motif) ligand 9	BM362452	cytokine activity;chemokine activity;chemokine activity;transcription factor activity;transcription factor activity;sequence-spe... <Preview truncated at 128 characters>	inflammatory response;immune response;immune response;cytokine production;positive regulation of transcription from RNA polymera... <Preview truncated at 128 characters>	extracellular region;extracellular region;extracellular region;extracellular region;extracellular space;nucleus;cytosol;cytoplas... <Preview truncated at 128 characters>
LOC535622	OLIGO_09630							1.5										no description	BM362573
Tpm3	OLIGO_09326					1.51			1.68				2			2.05		tropomyosin 3, gamma	BM362662	actin binding;protein binding;protein binding;protein binding;protein binding;CTD phosphatase activity;phosphoprotein phosphatas... <Preview truncated at 128 characters>	regulation of muscle contraction;cellular component movement;regulation of muscle contraction;cellular component movement;regula... <Preview truncated at 128 characters>	cytoplasm;cytoskeleton;cytoskeleton;muscle thin filament tropomyosin;muscle thin filament tropomyosin;muscle thin filament tropo... <Preview truncated at 128 characters>
LOC284379	OLIGO_10348				-2.3														BM362673	amino acid transmembrane transporter activity;	transport;amino acid transport;transmembrane transport;transmembrane transport;	membrane;membrane;integral to membrane;
TAP1	OLIGO_09590							1.75	1.8									transporter 1, ATP-binding cassette, sub-family B (MDR/TAP)	BM362685	nucleotide binding;nucleotide binding;transporter activity;protein binding;protein binding;ATP binding;ATP binding;ATP binding;A... <Preview truncated at 128 characters>	transport;transport;transport;defense response;peptide transport;transmembrane transport;transmembrane transport;transport;trans... <Preview truncated at 128 characters>	mitochondrion;membrane;integral to membrane;integral to membrane;membrane;integral to membrane;integral to membrane;
LOC510480	OLIGO_09739				-1.61														BM362799
Ikzf3	OLIGO_09570			2.01	-2.43						2.12					-1.58			BM362847	nucleic acid binding;DNA binding;protein binding;zinc ion binding;zinc ion binding;metal ion binding;protein heterodimerization ... <Preview truncated at 128 characters>	transcription;regulation of transcription;	intracellular;intracellular;nucleus;nucleus;nucleus;
Mrgprf	OLIGO_09950				1.79		2							1.59	2.02	2.09		MAS-related GPR, member F	BM362982	signal transducer activity;receptor activity;G-protein coupled receptor activity;signal transducer activity;receptor activity;G-... <Preview truncated at 128 characters>	signal transduction;G-protein coupled receptor protein signaling pathway;G-protein coupled receptor protein signaling pathway;si... <Preview truncated at 128 characters>	integral to membrane;integral to membrane;integral to membrane;integral to membrane;
MGC140677	OLIGO_09652				1.9														BM362989			cytoplasm;cytosol;
LOC507407	OLIGO_09951						1.53	1.5											BM363023	transcription factor activity;transcription corepressor activity;Wnt receptor activity;	learning or memory;	mitochondrion;lamellipodium;
LOC510417	OLIGO_09819				-1.7			1.53											BM363079		immune response;immune response;antigen processing and presentation;antigen processing and presentation;	membrane;membrane;integral to membrane;MHC class I protein complex;
Bt.9539	OLIGO_09892				1.66						-1.98								BM363088
SLC11A1	OLIGO_09626							1.69	2.47				1.54			1.61		solute carrier family 11 (proton-coupled divalent metal ion transporters), member 1	BM363129	transporter activity;manganese ion transmembrane transporter activity;protein homodimerization activity;metal ion:hydrogen antip... <Preview truncated at 128 characters>	protein import into nucleus, translocation;negative regulation of cytokine production;T cell proliferation during immune respons... <Preview truncated at 128 characters>	lysosome;late endosome;plasma membrane;cell outer membrane;endosome membrane;membrane;membrane;membrane;integral to membrane;pha... <Preview truncated at 128 characters>
XDH	OLIGO_06538							1.79										xanthine dehydrogenase	BM363144	catalytic activity;catalytic activity;catalytic activity;xanthine dehydrogenase activity;xanthine dehydrogenase activity;xanthin... <Preview truncated at 128 characters>	lactation;xanthine catabolic process;xanthine catabolic process;xanthine catabolic process;regulation of epithelial cell differe... <Preview truncated at 128 characters>	extracellular region;extracellular region;cytoplasm;cytoplasm;peroxisome;peroxisome;
BT.64609	OLIGO_09907				-1.95			1.6	1.64										BM363176
LOC506950	OLIGO_09883				-1.58														BM363244
LOC513111	OLIGO_09958				1.52														BM363262
DNMT3A	OLIGO_09691				-1.81													RIKEN cDNA 4833432E10 gene	BM363281	DNA binding;DNA binding;DNA binding;DNA (cytosine-5-)-methyltransferase activity;methyltransferase activity;zinc ion binding;tra... <Preview truncated at 128 characters>	DNA methylation;DNA methylation;DNA methylation;negative regulation of transcription from RNA polymerase II promoter;DNA methyla... <Preview truncated at 128 characters>	euchromatin;nucleus;cytoplasm;nuclear matrix;chromosome, centromeric region;euchromatin;euchromatin;nucleus;nucleus;nucleus;nucl... <Preview truncated at 128 characters>
UQCRH	OLIGO_05922				1.71	1.52												ubiquinol-cytochrome c reductase hinge protein	BM363367	ubiquinol-cytochrome-c reductase activity;	mitochondrial electron transport, ubiquinol to cytochrome c;transport;electron transport chain;	mitochondrion;mitochondrion;mitochondrial inner membrane;mitochondrial inner membrane;mitochondrial inner membrane;membrane;resp... <Preview truncated at 128 characters>
OAS1	OLIGO_05624							2.03	1.64						1.66	1.58		2,5-oligoadenylate synthetase 1, 40/46kDa	BM363371	RNA binding;RNA binding;ATP binding;ATP binding;transferase activity;transferase activity;nucleotidyltransferase activity;RNA bi... <Preview truncated at 128 characters>	immune response;immune response;immune response;immune response;immune response;immune response;
TSPAN33	OLIGO_09858					-1.79												tetraspanin 33	BM363508			membrane;membrane;integral to membrane;integral to membrane;integral to membrane;integral to membrane;
CORO1A	OLIGO_10959			1.56	-2.65				-1.78									coronin, actin binding protein, 1A	BM363541	actin binding;protein C-terminus binding;protein homodimerization activity;phosphoinositide 3-kinase binding;actin filament bind... <Preview truncated at 128 characters>	phagolysosome assembly;calcium ion transport;actin filament organization;regulation of cell shape;positive regulation of cell mi... <Preview truncated at 128 characters>	immunological synapse;phagocytic cup;cytoplasm;cytoplasm;cytoskeleton;cytoskeleton;plasma membrane;plasma membrane;cell cortex;m... <Preview truncated at 128 characters>
TMCO1	OLIGO_05642				1.56													transmembrane and coiled-coil domains 1	BM363592			Golgi membrane;endoplasmic reticulum;endoplasmic reticulum membrane;Golgi apparatus;membrane;integral to membrane;
ADRBK2	OLIGO_05650						1.63											adrenergic, beta, receptor kinase 2	BM363657	nucleotide binding;protein kinase activity;protein kinase activity;protein kinase activity;protein serine/threonine kinase activ... <Preview truncated at 128 characters>	protein amino acid phosphorylation;protein amino acid phosphorylation;protein amino acid phosphorylation;protein amino acid phos... <Preview truncated at 128 characters>
ADD1	OLIGO_09848				2.51													adducin 1 (alpha)	BM363681	metal ion binding;	biological_process;	cellular_component;
IgCgamma	OLIGO_09923				-1.52			1.96			1.89	-1.6			1.66				BM363693
TYROBP	OLIGO_09647							1.94										TYRO protein tyrosine kinase binding protein	BM363697	protein binding;protein binding;protein binding;protein binding;kinase activity;protein binding;protein binding;kinase activity;... <Preview truncated at 128 characters>		membrane;membrane;integral to membrane;
MYST4	OLIGO_09861				1.59													MYST histone acetyltransferase (monocytic leukemia) 4	BM363704	DNA binding;histone acetyltransferase activity;histone acetyltransferase activity;protein binding;transcription factor binding;z... <Preview truncated at 128 characters>	nucleosome assembly;negative regulation of transcription;histone H3 acetylation;positive regulation of transcription;regulation ... <Preview truncated at 128 characters>	nucleosome;nucleus;nucleus;MOZ/MORF histone acetyltransferase complex;nucleus;nucleosome;membrane fraction;integral to plasma me... <Preview truncated at 128 characters>
Centd1	OLIGO_05654							1.52	1.86					1.6				centaurin, delta 1	BM363713
C14ORF124	OLIGO_05656				-1.6														BM363727
BOLA	OLIGO_09615			1.55	-1.81		-1.65											MHC class I heavy chain	BM363744	molecular_function;	antigen processing and presentation of peptide antigen via MHC class I;immune response;immune response;immune response;antigen p... <Preview truncated at 128 characters>	membrane;membrane;membrane;membrane;integral to membrane;MHC class I protein complex;MHC class I protein complex;MHC class I pro... <Preview truncated at 128 characters>
CD48	OLIGO_09341							1.87	1.71									CD48 molecule	BM363748	protein binding;protein binding;eukaryotic cell surface binding;	signal transduction;T cell activation;response to protein stimulus;	external side of plasma membrane;membrane raft;
DTNB	OLIGO_09628		1.53		2.05		-1.53											dystrobrevin, beta	BM363749	protein binding;ribonucleoside-diphosphate reductase activity;	deoxyribonucleotide biosynthetic process;	cytoplasm;apical plasma membrane;
MPEG1	OLIGO_09774						1.89	2.26	1.64									macrophage expressed gene 1	BM363755			membrane;membrane;integral to membrane;
MTX1	OLIGO_08112				-1.7													metaxin 1	BM363845	protein binding;	protein targeting to mitochondrion;transport;protein transport;	mitochondrion;mitochondrion;mitochondrial outer membrane;mitochondrial outer membrane;mitochondrial outer membrane;membrane;inte... <Preview truncated at 128 characters>
LOC530411	OLIGO_09697		2.02				1.71												BM363899	protein binding;protein binding;zinc ion binding;zinc ion binding;zinc ion binding;metal ion binding;
LOC729317	OLIGO_11391				-1.8		1.62		-1.73		1.81			1.59					BM364177	nucleotide binding;voltage-gated anion channel activity;	transport;ion transport;anion transport;transmembrane transport;anion transport;neuron development;senescence;positive regulatio... <Preview truncated at 128 characters>	mitochondrion;mitochondrion;mitochondrial outer membrane;mitochondrial outer membrane;mitochondrial outer membrane;mitochondrial... <Preview truncated at 128 characters>
LOC618541	OLIGO_05352							2.64			1.82				2.9	2.29			BM364214
BT.67127	OLIGO_09595				-1.78														BM364311
YBX1	OLIGO_08030				1.55														BM364322	nucleic acid binding;DNA binding;DNA binding;single-stranded DNA binding;single-stranded DNA binding;RNA binding;transcription r... <Preview truncated at 128 characters>	in utero embryonic development;transcription;regulation of transcription, DNA-dependent;mRNA processing;RNA splicing;regulation ... <Preview truncated at 128 characters>	nucleus;nucleus;cytoplasm;cytoplasm;stress granule;ribonucleoprotein complex;histone pre-mRNA 3end processing complex;histone p... <Preview truncated at 128 characters>
NXT1	OLIGO_10429				1.54													NTF2-related export protein 1	BM364378	protein binding;protein binding;Ran GTPase binding;	RNA export from nucleus;protein export from nucleus;transport;transport;protein transport;mRNA transport;	intracellular;nucleus;nucleus;nuclear pore;cytoplasm;cytoplasm;
NNT	OLIGO_05370				-1.54				-2.23									nicotinamide nucleotide transhydrogenase	BM364482	catalytic activity;binding;NAD(P) transhydrogenase activity;NAD(P)+ transhydrogenase (AB-specific) activity;NAD(P)+ transhydroge... <Preview truncated at 128 characters>	metabolic process;proton transport;oxidation reduction;oxidation reduction;oxidation reduction;oxidation reduction;oxidation red... <Preview truncated at 128 characters>	mitochondrion;mitochondrion;mitochondrial inner membrane;mitochondrial inner membrane;membrane;integral to membrane;
FCGR3A	OLIGO_06039							1.71	1.63									Fc fragment of IgG, low affinity IIIa, receptor (CD16a)	BM364531	receptor activity;
IL10RA	OLIGO_09677							1.64	1.59									interleukin 10 receptor, alpha	BM364841
BT.27364	OLIGO_05394				-1.84														BM364898	lipopolysaccharide receptor activity;signal transducer activity;receptor activity;G-protein coupled receptor activity;platelet a... <Preview truncated at 128 characters>	cytokine production;chemotaxis;chemotaxis;inflammatory response;signal transduction;G-protein coupled receptor protein signaling... <Preview truncated at 128 characters>	plasma membrane;plasma membrane;plasma membrane;membrane;integral to membrane;integral to membrane;integral to membrane;integral... <Preview truncated at 128 characters>
CCL4L1	OLIGO_05402								1.59				1.6					chemokine (C-C motif) ligand 4-like 1	BM364954	cytokine activity;protein binding;chemokine activity;chemokine activity;	chemotaxis;inflammatory response;immune response;immune response;	extracellular region;extracellular region;extracellular region;extracellular region;extracellular space;
Samhd1	OLIGO_05408						2.19	3	3.23	1.77				1.8	2.03	2.94		SAM domain and HD domain 1	BM365025	catalytic activity;hydrolase activity;	innate immune response;regulation of innate immune response;regulation of innate immune response;defense response to virus;defen... <Preview truncated at 128 characters>	nucleus;nucleus;nucleus;nucleus;
GYPC	OLIGO_07190				-2.45				-2.08									glycophorin C (Gerbich blood group)	BM365231	protein binding;		cortical cytoskeleton;
RNF31	OLIGO_05420				1.81				1.55									ring finger protein 31	BM365273	zinc ion binding;zinc ion binding;zinc ion binding;		intracellular;intracellular;intracellular;
LOC508658	OLIGO_05432							1.52	1.55				1.72		1.5				BM365466	phosphoprotein phosphatase activity;protein tyrosine phosphatase activity;protein tyrosine phosphatase activity;protein tyrosine... <Preview truncated at 128 characters>	protein amino acid dephosphorylation;protein amino acid dephosphorylation;protein amino acid dephosphorylation;dephosphorylation... <Preview truncated at 128 characters>	endoplasmic reticulum;
CSF1	OLIGO_09802							1.58	2.04									colony stimulating factor 1 (macrophage)	BM365502	cytokine activity;cytokine activity;macrophage colony stimulating factor receptor binding;protein binding;growth factor activity... <Preview truncated at 128 characters>	positive regulation of cell-matrix adhesion;reproductive developmental process;positive regulation of cell proliferation;positiv... <Preview truncated at 128 characters>	extracellular space;integral to membrane;receptor complex;perinuclear region of cytoplasm;
SP140	OLIGO_10958			1.6	-1.88													SP140 nuclear body protein	BM365730
ACAA2	OLIGO_09820				1.96													acetyl-Coenzyme A acyltransferase 2 (mitochondrial 3-oxoacyl-Coenzyme A thiolase)	BM365867	catalytic activity;catalytic activity;acetyl-CoA C-acyltransferase activity;acyltransferase activity;transferase activity;transf... <Preview truncated at 128 characters>	lipid metabolic process;fatty acid metabolic process;metabolic process;metabolic process;metabolic process;metabolic process;met... <Preview truncated at 128 characters>	mitochondrion;mitochondrion;mitochondrion;mitochondrial inner membrane;
PSMC2	OLIGO_09752				1.5													proteasome (prosome, macropain) 26S subunit, ATPase 2	BM365916	nucleotide binding;nucleotide binding;ATP binding;ATP binding;ATP binding;hydrolase activity;ATPase activity;nucleoside-triphosp... <Preview truncated at 128 characters>	ubiquitin-dependent protein catabolic process;protein catabolic process;	proteasome complex;proteasome complex;nucleus;nucleus;cytoplasm;cytoplasm;cytoplasm;
BT.65721	OLIGO_09112							-1.5											BM366009	protein binding;protein binding;protein binding;		nucleus;nucleus;
R3HDM2	OLIGO_11503							-1.66											BM366158	nucleic acid binding;		nucleus;nucleus;
EIF1	OLIGO_10471				1.8	1.58		1.58					1.6	1.51				eukaryotic translation initiation factor 1	BM366260	translation initiation factor activity;translation initiation factor activity;translation initiation factor activity;	translation;translation;translational initiation;
MGC139114	OLIGO_05465				-2.1				-1.57										BM366314	DNA binding;protein binding;zinc ion binding;metal ion binding;	negative regulation of erythrocyte differentiation;	nucleus;nucleus;nucleus;protein complex;
HMOX1	OLIGO_09870				-1.63													heme oxygenase (decycling) 1 (EC:1.14.99.3)	BM366427	heme oxygenase (decyclizing) activity;heme oxygenase (decyclizing) activity;heme oxygenase (decyclizing) activity;heme oxygenase... <Preview truncated at 128 characters>	healing during inflammatory response;heme oxidation;heme oxidation;heme oxidation;response to oxidative stress;erythrocyte homeo... <Preview truncated at 128 characters>	endoplasmic reticulum;endoplasmic reticulum;microsome;microsome;
IRF1	OLIGO_05476				-1.97		1.79	2.06	1.54		1.74		1.52	1.87				interferon regulatory factor 1	BM366536	DNA binding;transcription factor activity;transcription factor activity;	transcription;regulation of transcription, DNA-dependent;regulation of transcription, DNA-dependent;regulation of transcription;	nucleus;nucleus;
MRPS15	OLIGO_09728				1.71													mitochondrial ribosomal protein S15	BM366695	structural constituent of ribosome;	translation;	mitochondrion;mitochondrion;ribosome;ribonucleoprotein complex;ribosome;intracellular;
TRERF1	OLIGO_05492						-1.59											hepatocellular carcinoma-related HCRP1	BM366880	transcription factor activity;transcription factor binding;DNA bending activity;RNA polymerase II transcription mediator activit... <Preview truncated at 128 characters>	steroid biosynthetic process;cholesterol catabolic process;multicellular organismal development;homophilic cell adhesion;homophi... <Preview truncated at 128 characters>	nucleus;
CCR1	OLIGO_05493						1.57	2.98	4.5						1.89	1.99		chemokine (C-C motif) receptor 1	BM366888	signal transducer activity;receptor activity;G-protein coupled receptor activity;C-C chemokine receptor activity;C-C chemokine r... <Preview truncated at 128 characters>	signal transduction;G-protein coupled receptor protein signaling pathway;G-protein coupled receptor protein signaling pathway;G-... <Preview truncated at 128 characters>	membrane;integral to membrane;integral to membrane;integral to membrane;integral to membrane;membrane;integral to membrane;integ... <Preview truncated at 128 characters>
Ddit4	OLIGO_05495						1.61	2.54	3				1.54					DNA-damage-inducible transcript 4	BM366955		apoptosis;negative regulation of signal transduction;	intracellular;cytoplasm;cytoplasm;cytoplasm;cytoplasm;cytoplasm;
SPINK4	OLIGO_12998				-2.67	-1.53	1.63				2.63	-1.56	-1.97					serine peptidase inhibitor, Kazal type 4	BM430399	serine-type endopeptidase inhibitor activity;serine-type endopeptidase inhibitor activity;peptidase inhibitor activity;molecular... <Preview truncated at 128 characters>	biological_process;	cellular_component;
SI	OLIGO_13156						-1.54		-3.45									sucrase-isomaltase (alpha-glucosidase)	BM431211	1-phosphatidylinositol-4-phosphate 5-kinase activity;	phosphatidylinositol metabolic process;	Golgi apparatus;Golgi apparatus;brush border;
SPINK1	OLIGO_12550				-2.42	-1.58													BM431662	serine-type endopeptidase inhibitor activity;serine-type endopeptidase inhibitor activity;protein binding;peptidase inhibitor ac... <Preview truncated at 128 characters>		extracellular region;extracellular region;
IFRD1	OLIGO_12652				-1.56													interferon-related developmental regulator 1	BM434867	binding;	adult somatic muscle development;muscle cell differentiation;organ morphogenesis;germ cell migration;regulation of striated musc... <Preview truncated at 128 characters>	nucleus;cell surface;
Ntn4	OLIGO_12846							-1.67						1.56				netrin 4	BM483193	protein binding;laminin-1 binding;	neuron remodeling;regulation of branching involved in salivary gland morphogenesis by extracellular matrix-epithelial cell signa... <Preview truncated at 128 characters>	proteinaceous extracellular matrix;basement membrane;
IL1R2	OLIGO_12586						1.68	1.96	2.41						1.6			interleukin 1 receptor, type II	BP104965	receptor activity;interleukin-1 receptor activity;interleukin-1, Type II, blocking receptor activity;
STAT3	OLIGO_13214							1.72						1.52	1.61	1.69		signal transducer and activator of transcription 3 (acute-phase response factor)	BP110564	DNA binding;DNA binding;transcription factor activity;transcription factor activity;transcription factor activity;transcription ... <Preview truncated at 128 characters>	temperature homeostasis;eye photoreceptor cell differentiation;transcription;regulation of transcription, DNA-dependent;regulati... <Preview truncated at 128 characters>	nucleus;nucleus;nucleus;nucleus;nucleus;nucleus;nucleus;cytoplasm;cytoplasm;cytoplasm;plasma membrane;nucleus;nucleus;nucleus;nu... <Preview truncated at 128 characters>
MFAP3	OLIGO_13093				-1.59													microfibrillar-associated protein 3	BP110782	molecular_function;	biological_process;	plasma membrane;plasma membrane;membrane;cellular_component;
MUC13	OLIGO_12382			1.56	-1.74	-1.52		3			1.82			1.65	2.85	2.02			BP111364
PLA2G2A	OLIGO_05695				-4.28	-1.53					2.9	-2.14		1.53				phospholipase A2, group IIA (platelets, synovial fluid)	CB223494	phospholipase A2 activity;phospholipase A2 activity;phospholipase A2 activity;calcium ion binding;hydrolase activity;metal ion b... <Preview truncated at 128 characters>	phospholipid metabolic process;lipid catabolic process;lipid catabolic process;lipid catabolic process;phospholipid metabolic pr... <Preview truncated at 128 characters>	<31x31 double>
NR4A3	OLIGO_05701							1.67	2.77									nuclear receptor subfamily 4, group A, member 3	CB423069
TM4SF1	OLIGO_12407			-1.62														transmembrane 4 superfamily member 1	CB425308			integral to membrane;integral to membrane;
IL17A	OLIGO_13034						1.75	3.31	4.5										CB432421	cytokine activity;cytokine activity;cytokine activity;	inflammatory response;inflammatory response;positive regulation of transcription from RNA polymerase II promoter;positive regula... <Preview truncated at 128 characters>	extracellular region;extracellular region;extracellular region;extracellular region;extracellular space;
SEC22A	OLIGO_13024						-1.67												CB442670		transport;vesicle-mediated transport;	membrane;integral to membrane;
NMB	OLIGO_12713				1.55													neuromedin B	CB445614		neuropeptide signaling pathway;	extracellular region;extracellular region;
ARHGEF19	OLIGO_12891				-1.86		1.76		-1.69									Rho guanine nucleotide exchange factor (GEF) 19	CB448299	Rho guanyl-nucleotide exchange factor activity;	regulation of Rho protein signal transduction;	intracellular;
C1GALT1	OLIGO_12666						1.77	2.28	1.82				1.78		1.85	2.48		core 1 synthase, glycoprotein-N-acetylgalactosamine 3-beta-galactosyltransferase, 1	CB448815	glycoprotein-N-acetylgalactosamine 3-beta-galactosyltransferase activity;glycoprotein-N-acetylgalactosamine 3-beta-galactosyltra... <Preview truncated at 128 characters>	angiogenesis;angiogenesis;angiogenesis;angiogenesis;kidney development;kidney development;multicellular organismal development;c... <Preview truncated at 128 characters>	membrane;membrane;membrane;integral to membrane;integral to membrane;integral to membrane;
TNFRSF18	OLIGO_12514				-1.96													tumor necrosis factor receptor superfamily, member 18	CB457045
FBXW5	OLIGO_12348				1.7		-1.61											F-box and WD-40 domain protein 5	CB460716			integral to plasma membrane;
SNCB	OLIGO_12656		1.51		1.92													synuclein, beta	CB463565		dopamine metabolic process;negative regulation of neuron apoptosis;dopamine metabolic process;negative regulation of neuron apop... <Preview truncated at 128 characters>	cytoplasm;cytoplasm;cytoplasm;mitochondrion;synaptosome;cytoplasm;mitochondrion;synaptosome;
TNFRSF9	OLIGO_05711							1.54										tumor necrosis factor receptor superfamily, member 9	CB468079	receptor activity;receptor activity;protein binding;	regulation of cell proliferation;
VIPR2	OLIGO_12685				-2.42				-2.44									vasoactive intestinal peptide receptor 2	CB536391	transmembrane receptor activity;vasoactive intestinal polypeptide receptor activity;G-protein coupled receptor activity;	G-protein coupled receptor protein signaling pathway;cell surface receptor linked signaling pathway;	<31x31 double>
BIRC3	OLIGO_12640				1.79	2.85	2.36	5.8	3.94		1.88	1.52	3.75		3.44	1.71		baculoviral IAP repeat-containing 3	CB538194	ubiquitin-protein ligase activity;protein binding;protein binding;protein binding;protein binding;zinc ion binding;metal ion bin... <Preview truncated at 128 characters>	regulation of apoptosis;	intracellular;intracellular;nucleus;cytoplasm;
RAB8B	OLIGO_13179							1.58	1.63										CB539028	nucleotide binding;protein binding;protein binding;GTP binding;GTP binding;GTP binding;GTP binding;	transport;small GTPase mediated signal transduction;small GTPase mediated signal transduction;protein transport;protein transpor... <Preview truncated at 128 characters>	mitochondrion;plasma membrane;plasma membrane;membrane;
ATG5	OLIGO_12793				-1.51													ATG5 autophagy related 5 homolog (S. cerevisiae)	CF613563	protein binding;protein binding;	autophagic vacuole assembly;blood vessel remodeling;autophagy;autophagy;autophagy;negative regulation of protein ubiquitination;... <Preview truncated at 128 characters>	cytoplasm;cytoplasm;cytoplasm;cytoplasm;autophagic vacuole;autophagic vacuole;pre-autophagosomal structure membrane;
Rsad2	OLIGO_09218							2.19	1.94				1.77			1.72			CK394055	molecular_function;catalytic activity;metal ion binding;iron-sulfur cluster binding;iron-sulfur cluster binding;	response to virus;defense response to virus;defense response to virus;defense response to virus;	endoplasmic reticulum;endoplasmic reticulum;endoplasmic reticulum;endoplasmic reticulum membrane;membrane;
CFLAR	OLIGO_08449							1.52	1.98									CASP8 and FADD-like apoptosis regulator	CK394093
LOC782274	OLIGO_09383				1.61		1.55	2.01	1.56										CK394111
FLJ20254	OLIGO_06480			-1.51			-1.88												CK394130	protein binding;		membrane;membrane;integral to membrane;
LOC534369	OLIGO_09430				-1.93					1.84	1.83		-1.52						CK394153	ATP binding;ATP binding;ATPase activity, coupled to transmembrane movement of ions, phosphorylative mechanism;ATPase activity, c... <Preview truncated at 128 characters>	ATP biosynthetic process;ATP biosynthetic process;metabolic process;cation transport;ATP biosynthetic process;	membrane;membrane;membrane;integral to membrane;
MGC137821	OLIGO_08195		-1.52		-2				-1.51										CK394158	protein binding;zinc ion binding;zinc ion binding;metal ion binding;
BT.1805	OLIGO_08887				2.18			1.59											CK394167
GPR92	OLIGO_12950				-1.98														CK771480	signal transducer activity;receptor activity;G-protein coupled receptor activity;purinergic nucleotide receptor activity, G-prot... <Preview truncated at 128 characters>	signal transduction;G-protein coupled receptor protein signaling pathway;G-protein coupled receptor protein signaling pathway;G-... <Preview truncated at 128 characters>	plasma membrane;plasma membrane;membrane;integral to membrane;integral to membrane;integral to membrane;
IL1R2	OLIGO_05740						1.54		1.54									interleukin 1 receptor, type II	CK771832	receptor activity;interleukin-1 receptor activity;interleukin-1, Type II, blocking receptor activity;
COX15	OLIGO_12775								1.9									COX15 homolog, cytochrome c oxidase assembly protein (yeast)	CK772573
CDKN2C	OLIGO_12819								-1.76									cyclin-dependent kinase inhibitor 2C (p18, inhibits CDK4)	CK772904	cyclin-dependent protein kinase inhibitor activity;protein binding;protein kinase binding;	regulation of cyclin-dependent protein kinase activity;G1/S transition of mitotic cell cycle;induction of apoptosis;cell cycle a... <Preview truncated at 128 characters>	nucleus;cytoplasm;
ADCY4	OLIGO_12742				2.04													adenylate cyclase 4	CK773454	nucleotide binding;adenylate cyclase activity;lyase activity;phosphorus-oxygen lyase activity;phosphorus-oxygen lyase activity;	cyclic nucleotide biosynthetic process;cyclic nucleotide biosynthetic process;cyclic nucleotide biosynthetic process;	integral to membrane;
NGFB	OLIGO_05669				-1.93				-1.53									nerve growth factor (beta polypeptide)	CK774058	receptor signaling protein activity;receptor binding;nerve growth factor receptor binding;growth factor activity;protein binding... <Preview truncated at 128 characters>	peripheral nervous system development;sensory perception of pain;negative regulation of neuron apoptosis;regulation of neuron di... <Preview truncated at 128 characters>	extracellular region;extracellular region;
SLC25A23	OLIGO_13189				-2.04	-1.74			-1.68										CK776076
F2RL2	OLIGO_12569							1.5	1.75									coagulation factor II (thrombin) receptor-like 2	CK776154	signal transducer activity;receptor activity;G-protein coupled receptor activity;protein binding;thrombin receptor activity;thro... <Preview truncated at 128 characters>	signal transduction;G-protein coupled receptor protein signaling pathway;G-protein coupled receptor protein signaling pathway;G-... <Preview truncated at 128 characters>	plasma membrane;plasma membrane;membrane;integral to membrane;integral to membrane;integral to membrane;integral to membrane;api... <Preview truncated at 128 characters>
SGCG	OLIGO_13213				-1.59													sarcoglycan, gamma (35kDa dystrophin-associated glycoprotein)	CK776607	protein binding;	cytoskeleton organization;	cytoplasm;cytoskeleton;cytoskeleton;plasma membrane;sarcoglycan complex;sarcoglycan complex;membrane;integral to membrane;integr... <Preview truncated at 128 characters>
USP12	OLIGO_12972				-1.75													ubiquitin specific peptidase 12	CK776819	cysteine-type endopeptidase activity;cysteine-type endopeptidase activity;ubiquitin thiolesterase activity;ubiquitin thiolestera... <Preview truncated at 128 characters>	ubiquitin-dependent protein catabolic process;ubiquitin-dependent protein catabolic process;protein deubiquitination;protein deu... <Preview truncated at 128 characters>
ERBB3	OLIGO_13133						-1.68		-1.51									v-erb-b2 erythroblastic leukemia viral oncogene homolog 3 (avian)	CK777953	protein kinase activity;protein kinase activity;transmembrane receptor protein tyrosine kinase activity;receptor signaling prote... <Preview truncated at 128 characters>	protein amino acid phosphorylation;protein amino acid phosphorylation;protein amino acid phosphorylation;protein amino acid phos... <Preview truncated at 128 characters>	extracellular space;membrane;membrane;integral to membrane;basolateral plasma membrane;apical plasma membrane;lateral plasma mem... <Preview truncated at 128 characters>
ARG2	OLIGO_05836								1.55									arginase, type II	CK778545	arginase activity;arginase activity;hydrolase activity;hydrolase activity;hydrolase activity, acting on carbon-nitrogen (but not... <Preview truncated at 128 characters>	urea cycle;ureteric bud development;arginine metabolic process;arginine metabolic process;	mitochondrion;mitochondrion;mitochondrion;
CSPG4	OLIGO_05833								1.84									chondroitin sulfate proteoglycan 4	CK778818	collagen binding;protein kinase binding;protein binding;protein serine/threonine kinase activity;	activation of MAPK activity;transmembrane receptor protein tyrosine kinase signaling pathway;intracellular protein kinase cascad... <Preview truncated at 128 characters>	plasma membrane;integral to plasma membrane;axon part;cytosol;plasma membrane;
AGT	OLIGO_05689							-1.66										angiotensinogen (serpin peptidase inhibitor, clade A, member 8)	CK831091	serine-type endopeptidase inhibitor activity;serine-type endopeptidase inhibitor activity;protein binding;protein heterodimeriza... <Preview truncated at 128 characters>	acrosome reaction;calcium ion-dependent exocytosis;vasoconstriction;regulation of blood vessel size;regulation of cell adhesion;... <Preview truncated at 128 characters>	extracellular region;extracellular region;extracellular space;alpha-beta T cell receptor complex;integral to plasma membrane;int... <Preview truncated at 128 characters>
LOC652614	OLIGO_12361			2.07	-2.16													similar to HLA class I histocompatibility antigen, A-11 alpha chain precursor (MHC class I antigen A*11)	CK831818	molecular_function;	antigen processing and presentation of peptide antigen via MHC class I;immune response;immune response;immune response;antigen p... <Preview truncated at 128 characters>	membrane;membrane;membrane;membrane;integral to membrane;MHC class I protein complex;MHC class I protein complex;MHC class I pro... <Preview truncated at 128 characters>
APOA4	OLIGO_05694				-2.74				-4.01									apolipoprotein A-IV	CK846594	copper ion binding;lipid binding;lipid binding;antioxidant activity;cholesterol transporter activity;phosphatidylcholine binding... <Preview truncated at 128 characters>	innate immune response in mucosa;transport;lipid transport;lipid transport;lipid transport;response to lipid hydroperoxide;leuko... <Preview truncated at 128 characters>	extracellular region;extracellular region;extracellular region;extracellular space;extracellular space;very-low-density lipoprot... <Preview truncated at 128 characters>
CDH22	OLIGO_13176				-2.03													cadherin 22	CK847243
DNAH9	OLIGO_13131						-1.61												CK847905
CHI3L2	OLIGO_12357								1.67							1.83		chitinase 3-like 2	CK849256
MMP1	OLIGO_12641						1.5	3.2	5.78						2.11	1.64		matrix metallopeptidase 1 (interstitial collagenase) (EC:3.4.24.7)	CK940399	metalloendopeptidase activity;metalloendopeptidase activity;metalloendopeptidase activity;metalloendopeptidase activity;metalloe... <Preview truncated at 128 characters>	proteolysis;proteolysis;proteolysis;proteolysis;proteolysis;metabolic process;collagen catabolic process;	extracellular region;proteinaceous extracellular matrix;proteinaceous extracellular matrix;extracellular matrix;extracellular ma... <Preview truncated at 128 characters>
POLR2K	OLIGO_13141				-1.84	-1.86												polymerase (RNA) II (DNA directed) polypeptide K, 7.0kDa	CK942890	DNA binding;DNA-directed RNA polymerase activity;DNA-directed RNA polymerase activity;metal ion binding;	transcription;transcription;	nucleus;nucleus;
AGR2	OLIGO_12316		-1.52		-2.32													anterior gradient homolog 2 (Xenopus laevis)	CK943568		mucus secretion;	mitochondrion;endoplasmic reticulum;
MGC127510	OLIGO_12909				-1.87				-3.41										CK945641	transporter activity;	sodium ion transport;transmembrane transport;	<31x31 double>
MXD1	OLIGO_05768			1.6				2.05	1.83						1.72	2.18			CK951562	transcription factor activity;transcription corepressor activity;transcription factor activity;transcription corepressor activit... <Preview truncated at 128 characters>	multicellular organismal development;cell proliferation;retinal ganglion cell axon guidance;signal transduction;retinal ganglion... <Preview truncated at 128 characters>	nucleus;nucleus;integral to plasma membrane;integral to plasma membrane;
Tubgcp6	OLIGO_12494				-1.92					1.51	1.61								CK952532	phospholipid transporter activity;	G-protein coupled receptor protein signaling pathway;	plasma membrane;
IFI16	OLIGO_12635				-1.68													interferon, gamma-inducible protein 16	CK952947
AICDA	OLIGO_05786							1.64										activation-induced cytidine deaminase	CK955406	catalytic activity;cytidine deaminase activity;cytidine deaminase activity;protein binding;zinc ion binding;zinc ion binding;zin... <Preview truncated at 128 characters>	mRNA processing;somatic diversification of immunoglobulins;isotype switching;	cytoplasm;
HNF4A	OLIGO_13194						-2.06											hepatocyte nuclear factor 4, alpha	CK955473	DNA binding;transcription factor activity;transcription factor activity;transcription factor activity;RNA polymerase II transcri... <Preview truncated at 128 characters>	transcription;regulation of transcription, DNA-dependent;regulation of transcription, DNA-dependent;regulation of transcription,... <Preview truncated at 128 characters>	nucleus;nucleus;nucleus;nucleus;nucleus;nucleus;
CXCL10	OLIGO_12484						2.31	2.84	6.69	1.52			1.59	1.74	2.88	2.74		chemokine (C-X-C motif) ligand 10	CK955893	cytokine activity;cytokine activity;chemokine activity;chemokine activity;chemokine activity;chemokine activity;	chemotaxis;inflammatory response;immune response;immune response;immune response;immune response;immune response;	extracellular region;extracellular region;extracellular region;extracellular region;extracellular region;extracellular space;ext... <Preview truncated at 128 characters>
CFH	OLIGO_05682				-1.68						1.8							complement factor H	CK959382
CYP2U1	OLIGO_05764							-1.58	-2.11									cytochrome P450, family 2, subfamily u, polypeptide 1	CK959431	monooxygenase activity;monooxygenase activity;monooxygenase activity;iron ion binding;iron ion binding;iron ion binding;electron... <Preview truncated at 128 characters>	oxidation reduction;oxidation reduction;oxidation reduction;	endoplasmic reticulum;endoplasmic reticulum membrane;microsome;microsome;membrane;integral to membrane;
CXCL11	OLIGO_13055						1.54	2.31	5.01						2.41	2.63		chemokine (C-X-C motif) ligand 11	CK959898	cytokine activity;chemokine activity;chemokine activity;chemokine activity;	chemotaxis;inflammatory response;immune response;immune response;immune response;	extracellular region;extracellular region;extracellular region;extracellular region;extracellular space;extracellular region;
ATP10B	OLIGO_12651				-1.61														CK960394
Lgals4	OLIGO_12372				1.67										1.71			lectin, galactose binding, soluble 4	CK973750	protein binding;sugar binding;sugar binding;
BMP2	OLIGO_13105							1.69	1.55		1.65							bone morphogenetic protein 2	CK975082	retinol dehydrogenase activity;growth factor activity;growth factor activity;growth factor activity;growth factor activity;trans... <Preview truncated at 128 characters>	branching involved in ureteric bud morphogenesis;inflammatory response;negative regulation of cell proliferation;embryonic devel... <Preview truncated at 128 characters>	extracellular region;extracellular space;
C12ORF48	OLIGO_12940				1.64													chromosome 12 open reading frame 48	CK977694
YPEL4	OLIGO_01332						-2.11												CN432282
RPS19	OLIGO_11117				1.64		-2.04		-1.52									ribosomal protein S19	CN432314
Kctd13	OLIGO_01362				-1.94						1.58								CN432361	voltage-gated potassium channel activity;protein binding;protein binding;identical protein binding;	potassium ion transport;	nucleus;nucleus;voltage-gated potassium channel complex;membrane;
ISG15	OLIGO_01345							2.33	4.02									ISG15 ubiquitin-like modifier	CN432461	protein binding;protein binding;protein tag;	response to virus;modification-dependent protein catabolic process;ISG15-protein conjugation;ISG15-protein conjugation;	extracellular region;extracellular region;cytoplasm;cytoplasm;
MGC142506	OLIGO_01360				-2.05														CN432533	nucleic acid binding;DNA binding;metal ion binding;
AMIGO3	OLIGO_01457				-1.74														CN432579
Plcl2	OLIGO_01829			1.59	-1.88						1.89								CN432620	phosphoric diester hydrolase activity;phosphoinositide phospholipase C activity;calcium ion binding;phospholipase C activity;	signal transduction;intracellular signaling pathway;lipid metabolic process;	cellular_component;
SCARNA9	OLIGO_01498							1.65											CN432679
ZNF207	OLIGO_07240				1.64			1.51											CN432824	zinc ion binding;zinc ion binding;		intracellular;intracellular;nucleus;
NEFL	OLIGO_01515				1.66													neurofilament, light polypeptide 68kDa	CN432834	structural molecule activity;structural constituent of cytoskeleton;structural constituent of cytoskeleton;protein C-terminus bi... <Preview truncated at 128 characters>	microtubule cytoskeleton organization;microtubule cytoskeleton organization;anterograde axon cargo transport;anterograde axon ca... <Preview truncated at 128 characters>	intermediate filament;intermediate filament;intermediate filament;neurofilament;neurofilament;neurofilament;axon;axon;axon;TSC1-... <Preview truncated at 128 characters>
VIM	OLIGO_10444				-1.67		1.54								-1.86			vimentin	CN432869	structural molecule activity;structural constituent of cytoskeleton;structural constituent of cytoskeleton;protein C-terminus bi... <Preview truncated at 128 characters>	biological_process;intermediate filament-based process;intermediate filament-based process;	cytoplasm;cytoplasm;cytoskeleton;intermediate filament;intermediate filament;intermediate filament;intermediate filament;plasma ... <Preview truncated at 128 characters>
COX8A	OLIGO_07049				1.7													cytochrome c oxidase subunit 8A (ubiquitous)	CN433029
Emp1	OLIGO_01613						2.92	2.65	7.2	1.81				1.58	1.97	1.84		epithelial membrane protein 1	CN433102
HSPA9	OLIGO_07267							1.75	1.87										CN433111	nucleotide binding;ATP binding;ATP binding;ATP binding;enzyme binding;unfolded protein binding;	protein folding;protein export from nucleus;	mitochondrion;mitochondrion;mitochondrion;mitochondrion;cell surface;mitochondrial nucleoid;
LOC441019	OLIGO_01626					-1.79		1.53	1.96										CN433159
LIG1	OLIGO_11150			1.79	-2.23				-1.93									ligase I, DNA, ATP-dependent (EC:6.5.1.1)	CN433185	nucleotide binding;DNA binding;DNA ligase (ATP) activity;DNA ligase (ATP) activity;DNA ligase (ATP) activity;DNA ligase (ATP) ac... <Preview truncated at 128 characters>	DNA replication;DNA replication;DNA replication;DNA replication;DNA replication;DNA repair;DNA repair;DNA repair;DNA repair;DNA ... <Preview truncated at 128 characters>
Eif4enif1	OLIGO_01630				1.81		2.76	2.05	1.82					2.11	2.15	2.9		eukaryotic translation initiation factor 4E nuclear import factor 1	CN433201	protein binding;protein binding;	cAMP biosynthetic process;transmembrane receptor protein tyrosine kinase signaling pathway;central nervous system development;po... <Preview truncated at 128 characters>	nucleus;cytoplasm;
FBL	OLIGO_01636				-1.82													fibrillarin	CN433309	RNA binding;RNA binding;RNA binding;protein binding;methyltransferase activity;methyltransferase activity;methyltransferase acti... <Preview truncated at 128 characters>	rRNA processing;rRNA processing;rRNA processing;tRNA processing;tRNA processing;tRNA processing;snoRNA metabolic process;rRNA pr... <Preview truncated at 128 characters>	granular component;nucleolus;nucleolus;Cajal body;granular component;nucleolus;nucleolus;Cajal body;
ELP4	OLIGO_01395				2.33	1.69												elongation protein 4 homolog (S. cerevisiae)	CN433332	phosphorylase kinase regulator activity;	transcription;regulation of transcription from RNA polymerase II promoter;regulation of transcription from RNA polymerase II pro... <Preview truncated at 128 characters>	nucleus;nucleus;cytoplasm;cytoplasm;cytoplasm;transcription elongation factor complex;Elongator holoenzyme complex;
MARCKS	OLIGO_10598							2.38	3.31				1.71		1.58	2.84		myristoylated alanine-rich protein kinase C substrate	CN433335	actin binding;protein kinase C binding;calmodulin binding;calmodulin binding;		cytoplasm;cytoplasm;cytoplasm;centrosome;plasma membrane;plasma membrane;cell cortex;membrane;membrane;germinal vesicle;
LRRK2	OLIGO_01398				-1.53			1.62											CN433357
ANKRD46	OLIGO_01419				1.62														CN433443			membrane;membrane;integral to membrane;
TMSB10	OLIGO_11135				1.71													thymosin beta 10	CN433519	actin binding;actin binding;actin binding;	cytoskeleton organization;actin cytoskeleton organization;sequestering of actin monomers;	cytoplasm;cytoplasm;cytoplasm;cytoskeleton;cytoskeleton;
D4ST1	OLIGO_01534				1.86													carbohydrate (N-acetylgalactosamine 4-0) sulfotransferase 14	CN433593	N-acetylgalactosamine 4-O-sulfotransferase activity;protein binding;sulfotransferase activity;sulfotransferase activity;	carbohydrate biosynthetic process;carbohydrate biosynthetic process;dermatan sulfate proteoglycan metabolic process;	integral to membrane;integral to membrane;
MGC142307	OLIGO_01551				-1.6														CN433667	nucleic acid binding;nucleic acid binding;DNA binding;DNA binding;DNA binding;DNA binding;DNA binding;DNA binding;DNA binding;DN... <Preview truncated at 128 characters>	DNA metabolic process;DNA topological change;DNA topological change;DNA topological change;DNA topological change;DNA topologica... <Preview truncated at 128 characters>	chromosome;chromosome;chromosome;chromosome;chromosome;chromosome;PML body;nucleus;
GAP43	OLIGO_01570							-1.81										growth associated protein 43	CN433843	calmodulin binding;	multicellular organismal development;nervous system development;glial cell differentiation;axon choice point recognition;cell di... <Preview truncated at 128 characters>	plasma membrane;plasma membrane;plasma membrane;membrane;cell junction;axon;growth cone membrane;cell projection;synapse;synapse... <Preview truncated at 128 characters>
Slc38a2	OLIGO_01641							1.55	1.77				1.56						CN433928	amino acid transmembrane transporter activity;symporter activity;amino acid transmembrane transporter activity;	transport;ion transport;sodium ion transport;amino acid transport;amino acid transport;amino acid transport;	plasma membrane;plasma membrane;plasma membrane;membrane;integral to membrane;plasma membrane;
CD99	OLIGO_06846							-1.66										CD99 molecule	CN434029
KDELC1	OLIGO_01759				1.58													KDEL (Lys-Asp-Glu-Leu) containing 1	CN434414
PSMA5	OLIGO_10632		-1.96															proteasome (prosome, macropain) subunit, alpha type, 5	CN434535	endopeptidase activity;threonine-type endopeptidase activity;threonine-type endopeptidase activity;protein binding;peptidase act... <Preview truncated at 128 characters>	ubiquitin-dependent protein catabolic process;proteolysis involved in cellular protein catabolic process;	proteasome complex;nucleus;nucleus;cytoplasm;cytoplasm;proteasome core complex;proteasome core complex, alpha-subunit complex;
SALL2	OLIGO_01798				1.57													sal-like 2 (Drosophila)	CN434845
LOC512753	OLIGO_01932				2.09														CN435116
CLCN4	OLIGO_01935			1.67	-1.77													chloride channel 4	CN435131	ion channel activity;voltage-gated chloride channel activity;voltage-gated chloride channel activity;	chloride transport;chloride transport;chloride transport;transmembrane transport;transmembrane transport;	membrane;membrane;membrane;integral to membrane;
USH1G	OLIGO_01900				-1.81		1.63												CN435195
PI4KII	OLIGO_07364						1.84												CN435221	1-phosphatidylinositol 4-kinase activity;phosphotransferase activity, alcohol group as acceptor;	phosphatidylinositol biosynthetic process;	integral to plasma membrane;membrane raft;
Pim3	OLIGO_01906						1.51	1.64	1.6					1.54		1.5		proviral integration site 3	CN435339
CYB5	OLIGO_09258							-1.67	-2.05									cytochrome b5 type A (microsomal)	CN435369
Strn3	OLIGO_01909								1.5							1.53		striatin, calmodulin binding protein 3	CN435375	transcription factor activity;calmodulin binding;transcription repressor activity;protein complex binding;protein phosphatase 2A... <Preview truncated at 128 characters>	negative regulation of transcription from RNA polymerase II promoter;positive regulation of transcription from RNA polymerase II... <Preview truncated at 128 characters>	protein phosphatase type 2A complex;nucleoplasm;nucleoplasm;cytoplasm;cytoplasm;cytoplasm;Golgi apparatus;plasma membrane;membra... <Preview truncated at 128 characters>
CYB5R2	OLIGO_01956				1.5											2.71			CN435411
SNRPG	OLIGO_11187		-1.54	1.71	-1.59			-1.57	-1.67									small nuclear ribonucleoprotein polypeptide G	CN435437	RNA binding;protein binding;protein binding;	mRNA processing;RNA splicing;spliceosome assembly;spliceosome assembly;RNA splicing;RNA splicing;	nucleus;nucleus;spliceosomal complex;U7 snRNP;ribonucleoprotein complex;small nuclear ribonucleoprotein complex;small nuclear ri... <Preview truncated at 128 characters>
FAM100B	OLIGO_07338				1.56								1.7						CN435445
GPX4	OLIGO_11188				-2.45													glutathione peroxidase 4 (phospholipid hydroperoxidase)	CN435446	peroxidase activity;glutathione peroxidase activity;glutathione peroxidase activity;oxidoreductase activity;phospholipid-hydrope... <Preview truncated at 128 characters>	chromatin organization;response to oxidative stress;multicellular organismal development;spermatogenesis;oxidation reduction;oxi... <Preview truncated at 128 characters>	nucleus;nuclear envelope;cytoplasm;cytoplasm;mitochondrion;mitochondrion;mitochondrion;mitochondrial inner membrane;cytosol;
KLF5	OLIGO_01837			1.76			-1.66											Kruppel-like factor 5 (intestinal)	CN435460	nucleic acid binding;transcription factor activity;protein binding;zinc ion binding;zinc ion binding;	angiogenesis;regulation of transcription, DNA-dependent;microvillus assembly;positive regulation of transcription;	intracellular;intracellular;
GPR177	OLIGO_01876							1.65	2.25										CN435531
HERC6	OLIGO_01879							3.01	2.57				2.03		1.75	2.5			CN435536	acid-amino acid ligase activity;	protein modification process;	intracellular;
UGCG	OLIGO_01949				1.52				1.76									UDP-glucose ceramide glucosyltransferase	CN435714	transferase activity;transferase activity, transferring glycosyl groups;
APOA1	OLIGO_10586			1.76	-3.88	-1.53	-2.57	-2.04	-15.65									apolipoprotein A-I	CN435718	beta-amyloid binding;lipid transporter activity;phospholipid binding;high-density lipoprotein binding;lipid binding;cholesterol ... <Preview truncated at 128 characters>	regulation of protein amino acid phosphorylation;endothelial cell proliferation;negative regulation of cytokine secretion during... <Preview truncated at 128 characters>	extracellular region;extracellular region;extracellular region;extracellular region;extracellular space;endocytic vesicle;cytopl... <Preview truncated at 128 characters>
ALDOB	OLIGO_05819						-2.23		-7.45									aldolase B, fructose-bisphosphate (EC:4.1.2.13)	CN435752	catalytic activity;fructose-bisphosphate aldolase activity;fructose-bisphosphate aldolase activity;fructose-bisphosphate aldolas... <Preview truncated at 128 characters>	glycolysis;glycolysis;glycolysis;NADH oxidation;metabolic process;fructose 1,6-bisphosphate metabolic process;positive regulatio... <Preview truncated at 128 characters>	microtubule organizing center;centriolar satellite;microtubule organizing center;centriolar satellite;
SEPP1	OLIGO_06877			1.84	-2.24			-2.3	-6.15									selenoprotein P, plasma, 1	CN435807
TOP2B	OLIGO_11200				1.6		-1.77											topoisomerase (DNA) II beta 180kDa	CN435846
PSME2	OLIGO_09964							1.82							1.57	1.62		proteasome (prosome, macropain) activator subunit 2 (PA28 beta)	CN435930	proteasome activator activity;proteasome activator activity;proteasome activator activity;		proteasome complex;proteasome activator complex;proteasome activator complex;proteasome activator complex;proteasome complex;
Stxbp1	OLIGO_02015			-1.53	1.82									1.73				syntaxin binding protein 1	CN435987		transport;vesicle docking during exocytosis;axon target recognition;protein transport;synaptic vesicle maturation;vesicle-mediat... <Preview truncated at 128 characters>	cytoplasm;cytoplasm;mitochondrion;membrane;membrane;
RAD21	OLIGO_11175		-1.53		-1.67		1.67		-1.85		1.67				-1.7	-1.88		RAD21 homolog (S. pombe)	CN436040	protein binding;	DNA repair;apoptosis;response to DNA damage stimulus;cell cycle;chromosome segregation;mitosis;cell division;positive regulation... <Preview truncated at 128 characters>	nuclear chromosome;nucleus;nucleus;
NCAM1	OLIGO_02089				1.81													neural cell adhesion molecule 1	CN436195
TRNT1	OLIGO_11045				-1.54		1.58											tRNA nucleotidyl transferase, CCA-adding, 1 (EC:2.7.7.25)	CN436231	tRNA binding;RNA binding;RNA binding;tRNA adenylyltransferase activity;transferase activity;nucleotidyltransferase activity;	RNA processing;tRNA 3-end processing;	intracellular;mitochondrion;
FLJ22675	OLIGO_02111								1.5										CN436289
SMC4	OLIGO_02116				-2.05						1.63								CN436304	ATP binding;		chromosome;
LOC504482	OLIGO_10656				1.54													no description	CN436353	actin binding;protein binding;	angiogenesis;ameboidal cell migration;endocytosis;cellular component movement;Rac protein signal transduction;lamellipodium asse... <Preview truncated at 128 characters>	ruffle;intracellular;cytoplasm;early endosome;cytoskeleton;cytoskeleton;lamellipodium;lamellipodium;cell projection;
Arnt2	OLIGO_07554				1.55									1.57				aryl hydrocarbon receptor nuclear translocator 2	CN436457	transcription factor activity;cytoskeletal protein binding;transcription factor activity;transcription corepressor activity;prot... <Preview truncated at 128 characters>	in utero embryonic development;response to hypoxia;cell proliferation;G1 phase of mitotic cell cycle;negative regulation of tran... <Preview truncated at 128 characters>	nucleus;nucleoplasm;transcription factor complex;nucleus;
NDUFB6	OLIGO_07539				1.9													NADH dehydrogenase (ubiquinone) 1 beta subcomplex, 6, 17kDa	CN436515		transport;electron transport chain;	mitochondrion;mitochondrion;mitochondrial inner membrane;mitochondrial inner membrane;mitochondrial respiratory chain complex I;... <Preview truncated at 128 characters>
LOC618437	OLIGO_10549				-1.86	-1.83													CN436618
AKAP8L	OLIGO_02211				-2.62													A kinase (PRKA) anchor protein 8-like	CN436648	DNA binding;DNA binding;	biological_process;	nucleus;nucleus;
ARRDC4	OLIGO_02239								2.18									arrestin domain containing 4	CN436702
LUM	OLIGO_02248				-2.05				-1.69									lumican	CN436729	protein binding;collagen binding;		extracellular region;proteinaceous extracellular matrix;proteinaceous extracellular matrix;proteinaceous extracellular matrix;pr... <Preview truncated at 128 characters>
GAS8	OLIGO_07593				-1.96													growth arrest-specific 8	CN436789
EPRS	OLIGO_02288				1.59													glutamyl-prolyl-tRNA synthetase	CN436937
Tagln3	OLIGO_07629				1.92						-1.8	1.62						transgelin 3	CN436951		muscle organ development;
SAP30BP	OLIGO_02318				-1.71													SAP30 binding protein	CN437010	protein binding;	induction of apoptosis;	nucleus;
CTXN1	OLIGO_02300				1.88														CN437075	protein binding;protein binding;	fibroblast growth factor receptor signaling pathway;transmembrane receptor protein tyrosine phosphatase signaling pathway;negati... <Preview truncated at 128 characters>	endosome;
NEO1	OLIGO_02305				1.54		1.66	1.5						1.69	1.75	1.81		neogenin homolog 1 (chicken)	CN437087
C230021P08RIK	OLIGO_07646				1.81													Riken cDNA C230021P08 gene	CN437089
ATP5G2	OLIGO_10651				1.54				-1.56									ATP synthase, H+ transporting, mitochondrial F0 complex, subunit C2 (subunit 9)	CN437272	lipid binding;hydrogen ion transmembrane transporter activity;hydrogen ion transmembrane transporter activity;transporter activi... <Preview truncated at 128 characters>	transport;ion transport;ATP synthesis coupled proton transport;ATP synthesis coupled proton transport;proton transport;	mitochondrion;membrane;integral to membrane;mitochondrial membrane;proton-transporting two-sector ATPase complex, proton-transpo... <Preview truncated at 128 characters>
TXNL2	OLIGO_02380				1.77													glutaredoxin 3	CN437338	protein binding;electron carrier activity;protein disulfide oxidoreductase activity;	cell redox homeostasis;cell redox homeostasis;cell redox homeostasis;	cytoplasm;cell cortex;
ACOT7	OLIGO_07598								1.5									acyl-CoA thioesterase 7	CN437352	palmitoyl-CoA hydrolase activity;	fatty acid catabolic process;	cytosol;
PSIP1	OLIGO_02383				1.64													PC4 and SFRS1 interacting protein 1	CN437355	DNA binding;molecular_function;	transcription;regulation of transcription;biological_process;	nucleus;nucleus;cellular_component;
SLC7A1	OLIGO_02387				1.72			1.5										solute carrier family 7 (cationic amino acid transporter, y+ system), member 1	CN437379	amino acid transmembrane transporter activity;arginine transmembrane transporter activity;	transport;amino acid transport;arginine transport;transmembrane transport;transmembrane transport;	membrane;membrane;integral to membrane;
SR-A1	OLIGO_02433							-1.57											CN437536		transcription from RNA polymerase II promoter;positive regulation of amyloid precursor protein biosynthetic process;	nucleus;
Klhl9	OLIGO_02443				1.51											2.8			CN437566	protein binding;protein binding;protein binding;
TMEM158	OLIGO_02461							1.61	2.86										CN437627	protein binding;		membrane;membrane;integral to membrane;
PPAP2A	OLIGO_07753				-1.79				-2.07									phosphatidic acid phosphatase 2a	CN437671	catalytic activity;	protein amino acid dephosphorylation;	<31x31 double>
LOC614391	OLIGO_02479				1.63														CN437677
TRAFD1	OLIGO_02483				1.66													TRAF type zinc finger domain containing 1	CN437685	zinc ion binding;metal ion binding;		intracellular;
AKT2	OLIGO_02472				2.04													v-akt murine thymoma viral oncogene homolog 2	CN437742	protein serine/threonine kinase activity;calcium ion binding;G-protein coupled receptor activity;	positive regulation of sodium ion transport;hormone transport;cell-cell adhesion;neurological system process;inner ear developme... <Preview truncated at 128 characters>	soluble fraction;microsome;cytosol;plasma membrane;insulin-responsive compartment;plasma membrane;
MMP13	OLIGO_02502							4.33	8.27						1.89	2.44		matrix metallopeptidase 13 (collagenase 3)	CN437800	metalloendopeptidase activity;metalloendopeptidase activity;metalloendopeptidase activity;metalloendopeptidase activity;metalloe... <Preview truncated at 128 characters>	proteolysis;proteolysis;proteolysis;proteolysis;proteolysis;metabolic process;bone mineralization;collagen catabolic process;col... <Preview truncated at 128 characters>	extracellular region;proteinaceous extracellular matrix;proteinaceous extracellular matrix;extracellular matrix;extracellular ma... <Preview truncated at 128 characters>
P4HA3	OLIGO_02497						1.87		-1.86									procollagen-proline, 2-oxoglutarate 4-dioxygenase (proline 4-hydroxylase), alpha polypeptide III (EC:1.14.11.2)	CN437812	procollagen-proline 4-dioxygenase activity;procollagen-proline 4-dioxygenase activity;binding;iron ion binding;oxidoreductase ac... <Preview truncated at 128 characters>	oxidation reduction;oxidation reduction;oxidation reduction;	endoplasmic reticulum;endoplasmic reticulum;endoplasmic reticulum lumen;
ATP1B3	OLIGO_08471				-2.42				-2.63									ATPase, Na+/K+ transporting, beta 3 polypeptide (EC:3.6.3.9)	CN437827	sodium:potassium-exchanging ATPase activity;protein binding;protein binding;	ATP biosynthetic process;transport;ion transport;potassium ion transport;potassium ion transport;potassium ion transport;sodium ... <Preview truncated at 128 characters>	cytoplasm;membrane;membrane;membrane;integral to membrane;melanosome;
EMX1	OLIGO_02535			1.52	-2.15													empty spiracles homeobox 1	CN437946		brain development;post-embryonic development;cerebral cortex regionalization;neuron differentiation;neuron migration;axon guidan... <Preview truncated at 128 characters>	nucleus;dendrite;
Wars	OLIGO_10714						1.76	6.7	11.6				1.7	1.59	4.11	8.16		tryptophanyl-tRNA synthetase (EC:6.1.1.2)	CN438008	nucleotide binding;nucleotide binding;nucleotide binding;nucleotide binding;aminoacyl-tRNA ligase activity;aminoacyl-tRNA ligase... <Preview truncated at 128 characters>	translation;translation;translation;translation;tRNA aminoacylation for protein translation;tRNA aminoacylation for protein tran... <Preview truncated at 128 characters>	cytoplasm;cytoplasm;cytoplasm;cytoplasm;cytoplasm;soluble fraction;cytoplasm;
C11ORF2	OLIGO_07526				1.76														CN438011
MCL1	OLIGO_02544								2.05									myeloid cell leukemia sequence 1 (BCL2-related)	CN438032		regulation of apoptosis;regulation of apoptosis;regulation of apoptosis;regulation of apoptosis;regulation of apoptosis;
GRTP1	OLIGO_07716				-1.64													GH regulated TBC protein 1	CN438048	Rab GTPase activator activity;	regulation of Rab GTPase activity;	intracellular;
IGFBP2	OLIGO_06909				1.73			-2.02	-1.5						-1.71			insulin-like growth factor binding protein 2, 36kDa	CN438129	insulin-like growth factor binding;insulin-like growth factor binding;insulin-like growth factor binding;insulin-like growth fac... <Preview truncated at 128 characters>	regulation of cell growth;regulation of insulin-like growth factor receptor signaling pathway;regulation of cell growth;	extracellular region;extracellular region;extracellular region;extracellular region;extracellular region;extracellular region;ex... <Preview truncated at 128 characters>
PRPF4	OLIGO_07814				2													PRP4 pre-mRNA processing factor 4 homolog (yeast)	CN438137		mRNA processing;RNA splicing;RNA splicing;	nucleus;spliceosomal complex;Cajal body;nuclear speck;
ca3	OLIGO_02592			-2.05							-2.23					1.59		carbonic anhydrase 3	CN438145	carbonate dehydratase activity;carbonate dehydratase activity;carbonate dehydratase activity;zinc ion binding;zinc ion binding;n... <Preview truncated at 128 characters>	one-carbon metabolic process;one-carbon metabolic process;	cytoplasm;cytoplasm;cytoplasm;
CN438169	OLIGO_07758						-1.89												CN438169	protein homodimerization activity;	B cell differentiation;inflammatory response;
DYNC1H1	OLIGO_10721				1.73				-1.64									dynein, cytoplasmic 1, heavy chain 1	CN438177
Mrps34	OLIGO_08351				-1.73										-1.5			mitochondrial ribosomal protein S34	CN438192			mitochondrion;mitochondrion;mitochondrion;ribosome;ribonucleoprotein complex;
RPS6KB2	OLIGO_07764				-1.79				-1.76									ribosomal protein S6 kinase, 70kDa, polypeptide 2	CN438197	protein kinase activity;protein serine/threonine kinase activity;netrin receptor activity;taste receptor activity;	protein amino acid phosphorylation;protein amino acid phosphorylation;brain development;regulation of axonogenesis;regulation of... <Preview truncated at 128 characters>	plasma membrane;cell surface;integral to membrane;
GM2A	OLIGO_10676								-1.77				1.51	-1.5				GM2 ganglioside activator	CN438214	sphingolipid activator protein activity;	glycolipid catabolic process;sphingolipid catabolic process;	lysosome;
DBN1	OLIGO_07550				1.77						-1.87							drebrin 1	CN438259	actin binding;	actin filament organization;	intracellular;actin cytoskeleton;
DHX37	OLIGO_02632				-1.79				-1.53										CN438264		central nervous system neuron development;
LOC787301	OLIGO_02607				-2.51				-1.59										CN438302
Mettl5	OLIGO_02610							1.7	3.06							3.05			CN438305	nucleic acid binding;methyltransferase activity;methyltransferase activity;	methylation;
CMBL	OLIGO_02617								-1.68									carboxymethylenebutenolidase homolog (Pseudomonas) (EC:3.1.1.45)	CN438335	protein binding;hydrolase activity;protein binding;		neuron projection;
HMGA2	OLIGO_02651				1.65													high mobility group AT-hook 2	CN438424
SPON2	OLIGO_02666				-1.64	-1.69												spondin 2, extracellular matrix protein	CN438433
CAPN5	OLIGO_02711				-1.51				-1.51									calpain 5	CN438566	calcium-dependent cysteine-type endopeptidase activity;		external side of plasma membrane;plasma membrane;
CPS1	OLIGO_02713				-2.12	-1.62			-2.45		1.71			1.73		-2.77		carbamoyl-phosphate synthetase 1, mitochondrial	CN438569
CN438591	OLIGO_02681				1.86														CN438591
MGC139630	OLIGO_02683								1.54										CN438598	nucleic acid binding;nucleic acid binding;DNA binding;DNA binding;RNA polymerase II transcription factor activity;transcription ... <Preview truncated at 128 characters>	transcription;transcription;transcription;transcription;transcription;RNA elongation;regulation of transcription, DNA-dependent;... <Preview truncated at 128 characters>	nucleus;nucleus;nucleus;nucleus;nucleus;nucleus;
ARID5B	OLIGO_02719								1.55									AT rich interactive domain 5B (Mrf1 like)	CN438652
YWHAZ	OLIGO_02737						1.51		1.77									tyrosine 3-monooxygenase/tryptophan 5-monooxygenase activation protein, zeta polypeptide	CN438661	transcription factor binding;protein domain specific binding;		cytoplasm;cytoplasm;melanosome;
2610029I01RIK	OLIGO_07202				-1.57													RIKEN cDNA 2610029I01 gene	CN438746	thiosulfate sulfurtransferase activity;transferase activity;	sulfate transport;
UBAP2L	OLIGO_02764				1.57														CN438798	protein binding;protein binding;
RBMS1	OLIGO_02774								2.43									RNA binding motif, single stranded interacting protein 1	CN438834	nucleotide binding;nucleic acid binding;DNA binding;RNA binding;RNA binding;	DNA replication;	nucleus;nucleus;
KIAA1718	OLIGO_02754							1.71											CN438873
SLC25A24	OLIGO_02783							1.56	1.94										CN438963	binding;binding;binding;calcium ion binding;calcium ion binding;	transport;transport;transport;transport;transmembrane transport;transmembrane transport;	mitochondrion;mitochondrion;mitochondrial inner membrane;mitochondrial inner membrane;mitochondrial inner membrane;mitochondrial... <Preview truncated at 128 characters>
MARCKSL1	OLIGO_02798							2.09	2.47										CN439003	calmodulin binding;calmodulin binding;
C11ORF74	OLIGO_07948				1.74														CN439094
LOC515425	OLIGO_11284				-1.79														CN439115
CN439222	OLIGO_07897					-1.53												Transcribed locus, strongly similar to XP_877798.3 PREDICTED: similar to zinc finger protein 142 (clone pHZ-49) isoform 2 [Bos t... <Preview truncated at 128 characters>	CN439222
PGAM2	OLIGO_02874						-1.84											phosphoglycerate mutase 2	CN439247	catalytic activity;bisphosphoglycerate mutase activity;2,3-bisphospho-D-glycerate 2-phosphohydrolase activity;phosphoglycerate m... <Preview truncated at 128 characters>	glycolysis;glycolysis;glycolysis;striated muscle contraction;metabolic process;
Rnaseh2a	OLIGO_07955				-1.78					1.71					-1.56			ribonuclease H2, large subunit	CN439265	nucleic acid binding;RNA binding;nuclease activity;endonuclease activity;ribonuclease H activity;ribonuclease H activity;ribonuc... <Preview truncated at 128 characters>	RNA metabolic process;	nucleus;nucleus;
RAB13	OLIGO_02893				-1.79													RAB13, member RAS oncogene family	CN439331	nucleotide binding;GTP binding;GTP binding;GTP binding;GTP binding;	transport;small GTPase mediated signal transduction;small GTPase mediated signal transduction;protein transport;protein transpor... <Preview truncated at 128 characters>	cytoplasm;Golgi apparatus;plasma membrane;plasma membrane;plasma membrane;cell-cell junction;tight junction;tight junction;tight... <Preview truncated at 128 characters>
BT.69334	OLIGO_02895						-2.06	-2.34	-4.22										CN439346
ZNF256	OLIGO_07355		1.6							1.52	-1.51								CN439477
TOP1	OLIGO_02910					1.57	1.64	1.91	2.57				2.24		1.6	1.89		topoisomerase (DNA) I (EC:5.99.1.2)	CN439491	chromatin binding;DNA topoisomerase type I activity;DNA topoisomerase type I activity;protein binding;DNA topoisomerase type I a... <Preview truncated at 128 characters>	DNA replication;DNA topological change;embryonic cleavage;response to drug;cell surface receptor linked signaling pathway;positi... <Preview truncated at 128 characters>	nuclear chromosome;nucleus;nucleus;nucleoplasm;nucleolus;cytoplasm;perikaryon;membrane raft;bleb;cytoplasm;voltage-gated calcium... <Preview truncated at 128 characters>
HIF1A	OLIGO_11560				1.6		1.63	2.66	3.71				1.61		1.88	2.46		hypoxia-inducible factor 1, alpha subunit (basic helix-loop-helix transcription factor)	CN439520	DNA binding;transcription factor activity;transcription factor activity;signal transducer activity;protein binding;transcription... <Preview truncated at 128 characters>	angiogenesis;response to hypoxia;response to hypoxia;neural crest cell migration;epithelial to mesenchymal transition;embryonic ... <Preview truncated at 128 characters>	nucleus;nucleus;nucleus;nucleus;nucleus;cytoplasm;cytoplasm;microtubule-based flagellum;nucleus;nucleus;nucleus;microtubule-base... <Preview truncated at 128 characters>
LOC617493	OLIGO_02929				1.61														CN439527
PLAC8	OLIGO_07274				-1.59			3.01	2.99									placenta-specific 8	CN439555
LTBP4	OLIGO_11228						-1.71											latent transforming growth factor beta binding protein 4	CN439563
UBAP2	OLIGO_08002						1.56		-1.82									ubiquitin associated protein 2	CN439612
PRPF40A	OLIGO_02969						1.55												CN439678	structural molecule activity;protein binding;structural molecule activity;protein binding;structural molecule activity;protein b... <Preview truncated at 128 characters>	apoptosis;tumor necrosis factor-mediated signaling pathway;apoptosis;tumor necrosis factor-mediated signaling pathway;apoptosis;... <Preview truncated at 128 characters>	intermediate filament;intermediate filament;intermediate filament;intermediate filament;intermediate filament;intermediate filam... <Preview truncated at 128 characters>
CSRP2	OLIGO_07333							1.68	2.48									cysteine and glycine-rich protein 2	CN439691	zinc ion binding;metal ion binding;	multicellular organismal development;cell differentiation;	nucleus;nucleus;
CDX2	OLIGO_10536				-2.34	-1.51												caudal type homeobox 2	CN439697	transcription corepressor activity;protein binding;protein binding;protein binding;neuronal Cdc2-like kinase binding;microtubule... <Preview truncated at 128 characters>	negative regulation of transcription from RNA polymerase II promoter;blood vessel development;blastocyst development;trophectode... <Preview truncated at 128 characters>	condensed nuclear chromosome;nucleus;cytosol;centrosome;cytoskeleton;centrosome;
PTGDS	OLIGO_08018		1.51		1.54			-1.53										prostaglandin D2 synthase 21kDa (brain)	CN439736	prostaglandin-D synthase activity;prostaglandin-D synthase activity;transporter activity;transporter activity;transporter activi... <Preview truncated at 128 characters>	prostaglandin biosynthetic process;prostaglandin biosynthetic process;lipid metabolic process;fatty acid biosynthetic process;tr... <Preview truncated at 128 characters>	extracellular region;extracellular region;extracellular region;extracellular region;nucleus;cytoplasm;endoplasmic reticulum;roug... <Preview truncated at 128 characters>
MSN	OLIGO_08034							1.54	1.6									moesin	CN439800	receptor binding;binding;cytoskeletal protein binding;cytoskeletal protein binding;cytoskeletal protein binding;cytoskeletal pro... <Preview truncated at 128 characters>	leukocyte cell-cell adhesion;membrane to membrane docking;leukocyte migration;	uropod;nucleus;nucleolus;cytoplasm;cytoplasm;cytoplasm;cytoplasm;cytoplasm;cytoplasm;cytoskeleton;cytoskeleton;cytoskeleton;plas... <Preview truncated at 128 characters>
SORT1	OLIGO_03023							-1.57	-1.86									sortilin 1	CN439911
GBP5	OLIGO_07601						1.71	3.45	2.7						2.61	3.07			CN440021	GTPase activity;GTPase activity;GTP binding;GTP binding;
YLPM1	OLIGO_03085			1.61	-1.95													YLP motif containing 1	CN440188
Ace2	OLIGO_02055			2.1	-2.07				-6.63	1.51	2.36					-1.5		angiotensin I converting enzyme (peptidyl-dipeptidase A) 2	CN440242	carboxypeptidase activity;peptidase activity;metallopeptidase activity;metallopeptidase activity;peptidyl-dipeptidase activity;h... <Preview truncated at 128 characters>	proteolysis;proteolysis;entry of virus into host cell;	extracellular region;extracellular region;plasma membrane;plasma membrane;membrane;membrane;integral to membrane;membrane;extrac... <Preview truncated at 128 characters>
EPD1	OLIGO_02056						1.63	2.06	3.39									cartilage oligomeric matrix protein	CN440243	calcium ion binding;calcium ion binding;calcium ion binding;calcium ion binding;calcium ion binding;collagen binding;heparin bin... <Preview truncated at 128 characters>	apoptosis;anti-apoptosis;cell adhesion;cell adhesion;cell adhesion;limb development;skeletal system development;cytoplasm organi... <Preview truncated at 128 characters>	extracellular region;extracellular region;proteinaceous extracellular matrix;proteinaceous extracellular matrix;proteinaceous ex... <Preview truncated at 128 characters>
KLF13	OLIGO_11213						-2.14											Kruppel-like factor 13	CN440277
ITGB1	OLIGO_07690							1.56	2.27							1.79		integrin, beta 1 (fibronectin receptor, beta polypeptide, antigen CD29 includes MDF2, MSK12)	CN440330	receptor activity;receptor activity;receptor activity;receptor activity;receptor activity;receptor activity;receptor activity;re... <Preview truncated at 128 characters>	G1/S transition of mitotic cell cycle;in utero embryonic development;cell fate specification;cell adhesion;cell adhesion;cell ad... <Preview truncated at 128 characters>	plasma membrane;plasma membrane;integrin complex;integrin complex;integrin complex;integrin complex;integrin complex;integrin co... <Preview truncated at 128 characters>
TMEM86B	OLIGO_02079				-1.75				-1.7									transmembrane protein 86B	CN440354			membrane;membrane;integral to membrane;integral to membrane;
BT.30542	OLIGO_02080								1.66										CN440366
LOC533620	OLIGO_03108								-1.52										CN440446
DDX3X	OLIGO_03116					1.57		1.66					1.77		1.57			DEAD (Asp-Glu-Ala-Asp) box polypeptide 3, X-linked	CN440452	growth factor activity;	embryonic pattern specification;induction of an organ;cell-cell signaling;negative regulation of cell differentiation;inner ear ... <Preview truncated at 128 characters>
LOC646396	OLIGO_03132				-1.97														CN440486
ASTN2	OLIGO_03137				1.57													astrotactin 2	CN440498
BT.73604	OLIGO_07899		2.01		1.65														CN440514
SCYL2	OLIGO_03140				1.53														CN440531	protein kinase activity;protein kinase activity;binding;binding;ATP binding;ATP binding;	protein amino acid phosphorylation;protein amino acid phosphorylation;
EIF3S3	OLIGO_11308				-1.78													eukaryotic translation initiation factor 3, subunit H	CN440565	translation initiation factor activity;translation initiation factor activity;translation initiation factor activity;protein bin... <Preview truncated at 128 characters>	translation;translational initiation;translational initiation;	cytoplasm;cytoplasm;eukaryotic translation initiation factor 3 complex;eukaryotic translation initiation factor 3 complex;eukary... <Preview truncated at 128 characters>
PFKL	OLIGO_06746				-1.61													phosphofructokinase, liver	CN440595	nucleotide binding;6-phosphofructokinase activity;6-phosphofructokinase activity;6-phosphofructokinase activity;6-phosphofructok... <Preview truncated at 128 characters>	glycolysis;glycolysis;glycolysis;glycolysis;	cytoplasm;6-phosphofructokinase complex;6-phosphofructokinase complex;
KHK	OLIGO_08102			-1.66			-1.64											ketohexokinase	CN440641	kinase activity;protein binding;kinase activity;		cytoplasm;
Vps11	OLIGO_03173								1.88							2.04		vacuolar protein sorting 11 (yeast)	CN440693	binding;protein binding;protein binding;protein binding;zinc ion binding;metal ion binding;		early endosome;actin filament;HOPS complex;
TLK1	OLIGO_03179								-1.77									tousled-like kinase 1	CN440713	protein serine/threonine kinase activity;ATP binding;protein kinase activity;	protein amino acid phosphorylation;	cellular_component;
TSPAN9	OLIGO_03180			1.53															CN440716	molecular_function;	biological_process;	integral to membrane;
LOC506045	OLIGO_03280							1.77	2.04				1.54		1.57	1.78			CN440959	nucleotide binding;nucleotide binding;ATP binding;ATP binding;ATP binding;nucleoside-triphosphatase activity;microfilament motor... <Preview truncated at 128 characters>		mitochondrion;
ERBB2IP	OLIGO_07742				1.72													Erbb2 interacting protein	CN441074	integrin binding;structural constituent of cytoskeleton;ErbB-2 class receptor binding;structural constituent of cytoskeleton;Erb... <Preview truncated at 128 characters>	cell cycle;cell adhesion;integrin-mediated signaling pathway;cell growth;intermediate filament cytoskeleton organization;basal p... <Preview truncated at 128 characters>	nucleus;cytoplasm;hemidesmosome;basement membrane;nucleus;cytoplasm;hemidesmosome;basement membrane;nucleus;cytoplasm;integral t... <Preview truncated at 128 characters>
AXIN1	OLIGO_03336				1.56						-1.87							axin 1	CN441219	protein binding;signal transducer activity;transcription factor activity;sequence-specific DNA binding;	sensory perception of sound;neuron fate specification;positive regulation of transcription from RNA polymerase II promoter;posit... <Preview truncated at 128 characters>	cytoplasm;nucleus;
FGF13	OLIGO_03337				1.87													fibroblast growth factor 13	CN441223	growth factor activity;growth factor activity;growth factor activity;growth factor activity;
PPA1	OLIGO_03362							2.65	3.1					1.6	1.72	4.17		pyrophosphatase (inorganic) 1	CN441261	magnesium ion binding;inorganic diphosphatase activity;inorganic diphosphatase activity;hydrolase activity;metal ion binding;	phosphate metabolic process;	cytoplasm;cytoplasm;cytoplasm;
ISL1	OLIGO_08199						-1.5											ISL LIM homeobox 1	CN441270	DNA binding;DNA binding;chromatin binding;transcription factor activity;protein binding;zinc ion binding;transcription regulator... <Preview truncated at 128 characters>	neural crest cell migration;heart morphogenesis;regulation of transcription, DNA-dependent;regulation of transcription, DNA-depe... <Preview truncated at 128 characters>	nucleus;nucleus;nucleus;nucleus;intracellular part;
APCDD1	OLIGO_11332				-2.34		1.55		-1.61										CN441328
TMEM104	OLIGO_03382				-3.02	-1.56			-1.83	1.5	2.15					-1.66		transmembrane protein 104	CN441403			membrane;integral to membrane;
CRYAB	OLIGO_06581				1.9													crystallin, alpha B	CN441431	structural constituent of eye lens;structural constituent of eye lens;structural constituent of eye lens;protein homodimerizatio... <Preview truncated at 128 characters>	anti-apoptosis;anti-apoptosis;muscle organ development;response to heat;negative regulation of intracellular transport;negative ... <Preview truncated at 128 characters>	soluble fraction;insoluble fraction;cytoplasm;cytoplasm;plasma membrane;Z disc;contractile fiber;cytoplasm;
Myo1b	OLIGO_03390							1.51	2.4							1.64		myosin IB	CN441432	nucleotide binding;motor activity;motor activity;motor activity;actin binding;ATP binding;ATP binding;		myosin complex;myosin complex;myosin complex;
SLC2A1	OLIGO_10777								2.1									solute carrier family 2 (facilitated glucose transporter), member 1	CN441490	transporter activity;transporter activity;glucose transmembrane transporter activity;protein binding;substrate-specific transmem... <Preview truncated at 128 characters>	transport;transport;transport;transport;carbohydrate transport;glucose transport;glucose import;transmembrane transport;transmem... <Preview truncated at 128 characters>	intracellular;cytoplasm;plasma membrane;plasma membrane;plasma membrane;integral to plasma membrane;membrane;membrane;membrane;m... <Preview truncated at 128 characters>
COMMD1	OLIGO_03430						2.1		1.77									COMM domain containing 1	CN441677	identical protein binding;		nucleus;nucleus;cytoplasm;cytoplasm;
LDOC1	OLIGO_03432				1.61														CN441683			nucleus;nucleus;
ACCN3	OLIGO_03454				-2.06				-2.19									amiloride-sensitive cation channel 3	CN441738		signal transduction;sensory perception;	integral to plasma membrane;plasma membrane;
C20ORF24	OLIGO_08262							1.54											CN441750			mitochondrion;
RNF11	OLIGO_03447				1.5														CN441754	protein binding;protein binding;zinc ion binding;metal ion binding;	protein ubiquitination during ubiquitin-dependent protein catabolic process;	ubiquitin ligase complex;ubiquitin ligase complex;nucleus;nucleus;cytoplasm;cytoplasm;
MYH8	OLIGO_10666					-1.85												myosin, heavy polypeptide 8, skeletal muscle, perinatal	CN441758	structural constituent of muscle;microfilament motor activity;actin binding;calmodulin binding;ATP binding;ATP binding;motor act... <Preview truncated at 128 characters>	biological_process;	myosin complex;
CN441810	OLIGO_03468				-1.57				-1.87										CN441810
ATP2A2	OLIGO_03475						1.52											ATPase, Ca++ transporting, cardiac muscle, slow twitch 2	CN441857	calcium-transporting ATPase activity;protein binding;protein binding;receptor activity;	regulation of the force of heart contraction;anti-apoptosis;hemopoiesis;cell growth;regulation of transcription, DNA-dependent;n... <Preview truncated at 128 characters>	membrane fraction;cell surface;
VCAM1	OLIGO_08153				-1.51			1.57					1.52					vascular cell adhesion molecule 1	CN441870		cell adhesion;cell-cell adhesion;cell-cell adhesion;cell adhesion;cell-cell adhesion;cell-cell adhesion;cell adhesion;cell-cell ... <Preview truncated at 128 characters>	membrane;membrane;integral to membrane;membrane;membrane;integral to membrane;membrane;membrane;integral to membrane;
FGFR3	OLIGO_03517							-1.56	-2.03									fibroblast growth factor receptor 3 (achondroplasia, thanatophoric dwarfism)	CN442012	receptor activity;fibroblast growth factor receptor activity;protein binding;nucleotide binding;protein kinase activity;protein ... <Preview truncated at 128 characters>	MAPKKK cascade;morphogenesis of an epithelium;positive regulation of cell proliferation;forebrain development;positive regulatio... <Preview truncated at 128 characters>	lysosome;internal side of plasma membrane;perinuclear region of cytoplasm;lysosome;internal side of plasma membrane;membrane;int... <Preview truncated at 128 characters>
ZFPL1	OLIGO_07427				1.62													zinc finger protein-like 1	CN442028	metal ion binding;	transport;vesicle-mediated transport;	Golgi apparatus;Golgi apparatus;Golgi apparatus;membrane;integral to membrane;
HSPA1A	OLIGO_07564								1.73									heat shock 70kDa protein 1A	CN442098	nucleotide binding;ATP binding;ATP binding;unfolded protein binding;	response to stress;mRNA catabolic process;anti-apoptosis;response to unfolded protein;	nucleus;mitochondrion;endoplasmic reticulum;cytoplasm;
ARL2	OLIGO_03549				-1.85													ADP-ribosylation factor-like 2	CN442144	nucleotide binding;protein binding;GTP binding;GTP binding;GTP binding;GTP binding;	cell cycle;small GTPase mediated signal transduction;	intracellular;cytoplasm;microtubule organizing center;cytoskeleton;
HNRPU	OLIGO_03585				-1.58													heterogeneous nuclear ribonucleoprotein U (scaffold attachment factor A)	CN442307	nucleic acid binding;nucleic acid binding;protein binding;protein binding;ATP binding;protein binding;protein binding;ATP bindin... <Preview truncated at 128 characters>	cell killing;CRD-mediated mRNA stabilization;cell killing;CRD-mediated mRNA stabilization;	ribonucleoprotein complex;CRD-mediated mRNA stability complex;CRD-mediated mRNA stability complex;
Leo1	OLIGO_03586				-1.76						1.62			-1.81				Leo1, Paf1/RNA polymerase II complex component, homolog (S. cerevisiae)	CN442309
SERBP1	OLIGO_03219							1.61											CN442388	mRNA 3-UTR binding;protein binding;
HMGCS1	OLIGO_11320				1.74	1.58												3-hydroxy-3-methylglutaryl-Coenzyme A synthase 1 (soluble)	CN442427	catalytic activity;hydroxymethylglutaryl-CoA synthase activity;hydroxymethylglutaryl-CoA synthase activity;hydroxymethylglutaryl... <Preview truncated at 128 characters>	metabolic process;isoprenoid biosynthetic process;isoprenoid biosynthetic process;isoprenoid biosynthetic process;isoprenoid bio... <Preview truncated at 128 characters>	soluble fraction;cytoplasm;cellular_component;cellular_component;
UBE1L	OLIGO_12460				-2.18						1.7							ubiquitin-like modifier activating enzyme 7	CN786388	catalytic activity;catalytic activity;binding;ATP binding;small protein activating enzyme activity;small protein activating enzy... <Preview truncated at 128 characters>	protein modification process;protein modification process;protein modification process;metabolic process;modification-dependent ... <Preview truncated at 128 characters>
CXCL13	OLIGO_05763							1.51	-1.75									chemokine (C-X-C motif) ligand 13 (B-cell chemoattractant)	CN792099	chemokine activity;chemokine activity;	immune response;immune response;lymph node development;	extracellular region;extracellular region;
Slc7a9	OLIGO_12664				-1.9		-2.39	-3	-4.28						-2.69	-2.38		solute carrier family 7 (cationic amino acid transporter, y+ system), member 9	CN792196	amino acid transmembrane transporter activity;	transport;amino acid transport;transmembrane transport;transmembrane transport;	membrane;membrane;integral to membrane;
LOC652614	OLIGO_12362				-2.51	-1.67		1.53										similar to HLA class I histocompatibility antigen, A-11 alpha chain precursor (MHC class I antigen A*11)	CN999995		immune response;immune response;antigen processing and presentation;antigen processing and presentation;	membrane;membrane;integral to membrane;MHC class I protein complex;
CHDH	OLIGO_12927						-1.86											choline dehydrogenase (EC:1.1.99.1)	CO879275
KCNK12	OLIGO_13197				2.18														CO879600
ANKRD22	OLIGO_05706						2.06	2.4	2.81									ankyrin repeat domain 22	CO884194
BoLA-DRB3	OLIGO_12364				-3.45	-1.51	1.67			1.6	2.66		-1.94					major histocompatibility complex, class II, DRB3	CO889316		antigen processing and presentation of peptide or polysaccharide antigen via MHC class II;immune response;antigen processing and... <Preview truncated at 128 characters>	membrane;integral to membrane;MHC class II protein complex;MHC class II protein complex;membrane;integral to membrane;MHC class ... <Preview truncated at 128 characters>
GPSM1	OLIGO_07072				1.74													G-protein signalling modulator 1 (AGS3-like, C. elegans)	CR451566	binding;binding;GTPase activator activity;	signal transduction;	cellular_component;
MGC143401	OLIGO_00934						-1.6												CR451626
SPCS3	OLIGO_07145				1.84													signal peptidase complex subunit 3 homolog (S. cerevisiae)	CR451631	peptidase activity;peptidase activity;hydrolase activity;	signal peptide processing;	endoplasmic reticulum;endoplasmic reticulum;signal peptidase complex;endoplasmic reticulum membrane;microsome;microsome;membrane... <Preview truncated at 128 characters>
ANXA2	OLIGO_06876				2.02				2.12									annexin A2	CR451651	phospholipase inhibitor activity;calcium ion binding;calcium ion binding;calcium ion binding;calcium ion binding;calcium-depende... <Preview truncated at 128 characters>	angiogenesis;collagen fibril organization;fibrinolysis;	extracellular region;proteinaceous extracellular matrix;basement membrane;basement membrane;cytoplasm;early endosome;sarcolemma;... <Preview truncated at 128 characters>
SMAD3	OLIGO_07612								1.55									SMAD family member 3	CR451670
ACTR1B	OLIGO_08184				-1.54				-1.72										CR451692	nucleotide binding;protein binding;ATP binding;ATP binding;		cytoplasm;cytoplasm;cytoplasm;microtubule organizing center;cytoskeleton;cytoskeleton;dynactin complex;
MLF2	OLIGO_06267							-1.59							-1.52			myeloid leukemia factor 2	CR451700	protein binding;protein binding;	defense response;	nucleus;cytoplasm;focal adhesion;
HEY1	OLIGO_10010				-2.01													hairy/enhancer-of-split related with YRPW motif 1	CR451719	DNA binding;DNA binding;protein binding;transcription regulator activity;transcription regulator activity;	vasculogenesis;transcription;regulation of transcription, DNA-dependent;Notch signaling pathway;multicellular organismal develop... <Preview truncated at 128 characters>	nucleus;nucleus;nucleus;nucleus;
PVRL3	OLIGO_00969							1.67	1.81						1.63	1.91		poliovirus receptor-related 3	CR451737
Ssrp1	OLIGO_10157				-1.67										-1.56			structure specific recognition protein 1	CR451784	DNA binding;DNA binding;protein binding;DNA binding;DNA binding;protein binding;protein binding;DNA binding;		nucleus;nucleus;nucleus;cytoplasm;nucleus;nucleus;nucleus;cytoplasm;
RASGEF1C	OLIGO_00940		1.56		1.63													RasGEF domain family, member 1C	CR451793	guanyl-nucleotide exchange factor activity;guanyl-nucleotide exchange factor activity;	small GTPase mediated signal transduction;regulation of small GTPase mediated signal transduction;	intracellular;intracellular;
BCAT1	OLIGO_00466				1.74													branched chain aminotransferase 1, cytosolic	CR451798	catalytic activity;catalytic activity;branched-chain-amino-acid transaminase activity;branched-chain-amino-acid transaminase act... <Preview truncated at 128 characters>	metabolic process;metabolic process;cellular amino acid biosynthetic process;branched chain family amino acid metabolic process;... <Preview truncated at 128 characters>	mitochondrion;cytosol;
SEPHS2	OLIGO_07936				1.71													selenophosphate synthetase 2	CR451801	ATP binding;catalytic activity;selenide, water dikinase activity;ATP binding;catalytic activity;selenide, water dikinase activit... <Preview truncated at 128 characters>	biological_process;biological_process;	cellular_component;cellular_component;
ANKRD12	OLIGO_05995			-1.71														ankyrin repeat domain 12	CR451846
NT5C	OLIGO_00582				-2													5, 3-nucleotidase, cytosolic	CR451866	5-nucleotidase activity;phosphatase activity;pyrimidine nucleotide binding;	pyrimidine deoxyribonucleotide catabolic process;dephosphorylation;	nucleus;cytoplasm;mitochondrion;
BCL7C	OLIGO_00512				-2.28	-1.73	2		-1.63									B-cell CLL/lymphoma 7C	CR451870
S100A9	OLIGO_07837				1.67		4.05	7.62	17.81					2.73	3.13	3.22		S100 calcium binding protein A9	CR451873	calcium ion binding;calcium ion binding;protein binding;	chemotaxis;	extracellular region;extracellular region;nucleus;cytoplasm;cytoplasm;cytoplasm;cytoskeleton;cytoskeleton;plasma membrane;plasma... <Preview truncated at 128 characters>
OTC	OLIGO_07384							-1.6	-2.97									ornithine carbamoyltransferase	CR451970	ornithine carbamoyltransferase activity;ornithine carbamoyltransferase activity;amino acid binding;amino acid binding;transferas... <Preview truncated at 128 characters>	urea cycle;cellular amino acid metabolic process;cellular amino acid metabolic process;cellular amino acid metabolic process;cel... <Preview truncated at 128 characters>	mitochondrion;mitochondrion;mitochondrion;mitochondrion;mitochondrial inner membrane;mitochondrial inner membrane;mitochondrial ... <Preview truncated at 128 characters>
KLHL29	OLIGO_00978				-1.64														CR452097	protein binding;protein binding;	biological_process;biological_process;	cellular_component;cellular_component;
LOC390354	OLIGO_06806			1.91	-2.78					1.58	2.29			-1.9	-1.56	-1.54			CR452147	structural constituent of ribosome;structural constituent of ribosome;protein binding;RNA binding;RNA binding;RNA binding;protei... <Preview truncated at 128 characters>	translation;translation;	intracellular;intracellular;ribosome;ribosome;ribosome;ribonucleoprotein complex;
ZNF550	OLIGO_00560				-1.74					1.79			-1.5						CR452212
TMEM125	OLIGO_00991				-1.91				-1.52										CR452289			membrane;membrane;integral to membrane;
LOC512355	OLIGO_00425				-1.85														CR452314	signal transducer activity;protein binding;protein binding;protein binding;electron carrier activity;	positive regulation of T cell cytokine production;protein complex assembly;activation of NF-kappaB-inducing kinase activity;sign... <Preview truncated at 128 characters>	mitochondrion;nucleus;
Ankrd25	OLIGO_10178							1.84	5.04							1.76		KN motif and ankyrin repeat domains 2	CR452351
DBNDD2	OLIGO_11034						-1.92												CR452375	protein binding;protein binding;	biological_process;	cytoplasm;cytoplasm;
CCDC115	OLIGO_11035						-1.53		-1.56										CR452382
DUT	OLIGO_08004								-1.97		1.54					-2		deoxyuridine triphosphatase	CR452397	dUTP diphosphatase activity;hydrolase activity;	dUTP metabolic process;dUTP metabolic process;	mitochondrion;
DHFR	OLIGO_10166				-1.75	1.7	-1.59		1.6									dihydrofolate reductase	CR452418	dihydrofolate reductase activity;dihydrofolate reductase activity;dihydrofolate reductase activity;dihydrofolate reductase activ... <Preview truncated at 128 characters>	glycine biosynthetic process;glycine biosynthetic process;one-carbon metabolic process;nucleotide biosynthetic process;nucleotid... <Preview truncated at 128 characters>
RPL5	OLIGO_07285				-2.35						1.61			-1.9	-1.63			ribosomal protein L5	CR452490	RNA binding;structural constituent of ribosome;structural constituent of ribosome;5S rRNA binding;rRNA binding;	translation;translation;	intracellular;intracellular;nucleus;nucleolus;cytoplasm;cytoplasm;ribosome;ribosome;ribosome;ribonucleoprotein complex;
MGC142357	OLIGO_00919		-1.64		-2.45	-1.54													CR452513	transporter activity;secondary active sulfate transmembrane transporter activity;secondary active sulfate transmembrane transpor... <Preview truncated at 128 characters>	transport;chloride transport;sulfate transport;sulfate transport;bicarbonate transport;formate transport;transmembrane transport... <Preview truncated at 128 characters>	membrane fraction;integral to plasma membrane;membrane;membrane;membrane;membrane;integral to membrane;integral to membrane;
TSPAN31	OLIGO_10041							1.51										tetraspanin 31	CR452519			membrane;membrane;integral to membrane;integral to membrane;integral to membrane;
C20ORF94	OLIGO_10011				1.51														CR452558
MAGED4	OLIGO_09646				1.74														CR452645
FAM33A	OLIGO_10060				-1.65				-1.64										CR452653
BT.11433	OLIGO_01039								2.05										CR452679	protein binding;protein binding;protein binding;protein tyrosine phosphatase activity;	positive regulation of leukocyte migration;transport;exocytosis;exocytosis;exocytosis;negative regulation of cell adhesion;prote... <Preview truncated at 128 characters>	endoplasmic reticulum;endoplasmic reticulum membrane;endoplasmic reticulum membrane;endoplasmic reticulum membrane;membrane;inte... <Preview truncated at 128 characters>
AKAP13	OLIGO_10397						1.88		1.61									A kinase (PRKA) anchor protein 13	CR452711
MIF	OLIGO_08252							-1.86	-1.73									macrophage migration inhibitory factor (glycosylation-inhibiting factor)	CR452765	dopachrome isomerase activity;dopachrome isomerase activity;dopachrome isomerase activity;cytokine activity;cytokine activity;is... <Preview truncated at 128 characters>	prostaglandin biosynthetic process;inflammatory response;cell surface receptor linked signaling pathway;cell proliferation;carbo... <Preview truncated at 128 characters>	extracellular region;extracellular region;extracellular region;extracellular space;cytoplasm;cytoplasm;
Nfia	OLIGO_00535						2.88	5.05	5.4	2.06				1.87	3.28	3.87		nuclear factor I/A	CR452774	DNA binding;transcription factor activity;transcription factor activity;transcription activator activity;	DNA replication;DNA replication;DNA replication;transcription;regulation of transcription, DNA-dependent;regulation of transcrip... <Preview truncated at 128 characters>	intracellular;nucleus;nucleus;nucleus;nucleus;
Tmcc3	OLIGO_00531							1.55					2.29			1.6			CR452826			integral to membrane;
GTF2A2	OLIGO_09466				1.79													general transcription factor IIA, 2, 12kDa	CR452841	RNA polymerase II transcription factor activity;RNA polymerase II transcription factor activity;RNA polymerase II transcription ... <Preview truncated at 128 characters>	transcription initiation from RNA polymerase II promoter;transcription initiation from RNA polymerase II promoter;transcription ... <Preview truncated at 128 characters>	transcription factor TFIIA complex;transcription factor TFIIA complex;transcription factor TFIIA complex;transcription factor TF... <Preview truncated at 128 characters>
ZNF696	OLIGO_01074			1.7	-2.05													zinc finger protein 696	CR452893
PARC	OLIGO_01075				-1.73				-1.82									p53-associated parkin-like cytoplasmic protein	CR452907
LOC534434	OLIGO_00913							-1.55											CR453053
COX7C	OLIGO_10973				-1.98		1.93		-1.56							-1.52		cytochrome c oxidase subunit VIIc	CR453074	cytochrome-c oxidase activity;		mitochondrion;mitochondrial inner membrane;mitochondrial inner membrane;membrane;integral to membrane;
Arid3b	OLIGO_10161			1.62	2.35							2.21			-1.58	1.54			CR453261	DNA binding;	cell-matrix adhesion;cell-matrix adhesion;	nucleus;
PWP1	OLIGO_06110				1.6													PWP1 homolog (S. cerevisiae)	CR453280			nucleus;nucleus;
CTH	OLIGO_00852								1.66									cystathionase (cystathionine gamma-lyase)	CR453287
RNF19	OLIGO_00849							1.5										ring finger protein 19A	CR453307	transcription factor binding;identical protein binding;alpha-N-acetylneuraminate alpha-2,8-sialyltransferase activity;	microtubule cytoskeleton organization;protein modification process;glycosphingolipid biosynthetic process;carbohydrate metabolic... <Preview truncated at 128 characters>	centrosome;
GNB2L1	OLIGO_06772				-1.81	-1.64	1.5				2.41		-2.1			-1.74		guanine nucleotide binding protein (G protein), beta polypeptide 2-like 1	CR453394	protein binding;protein phosphatase binding;receptor binding;		cytoplasm;cytoplasm;plasma membrane;plasma membrane;membrane;neuronal cell body;neuronal cell body;
C18orf24	OLIGO_08508			-1.59	2.07		-1.61			-2.28			1.6						CR453395
S100A11	OLIGO_10776								2.74				1.5			2.29		S100 calcium binding protein A11	CR453487	calcium ion binding;calcium ion binding;protein homodimerization activity;S100 beta binding;calcium-dependent protein binding;pr... <Preview truncated at 128 characters>	signal transduction;negative regulation of DNA replication;negative regulation of cell proliferation;	ruffle;nucleus;ruffle;nucleus;cytoplasm;
RPL35A	OLIGO_10349		-1.65	1.76	-2.54				-2.06									ribosomal protein L35a	CR453519	tRNA binding;RNA binding;structural constituent of ribosome;structural constituent of ribosome;protein binding;protein binding;	translation;translation;	intracellular;intracellular;ribosome;ribosome;ribosome;ribonucleoprotein complex;
LOC532835	OLIGO_01053				1.57								1.77			1.52			CR453522	catalytic activity;catalytic activity;protein binding;ornithine decarboxylase activator activity;	polyamine biosynthetic process;
RPS6	OLIGO_10612				-1.6				-1.5									ribosomal protein S6	CR453525	structural constituent of ribosome;	translation;	ribosome;intracellular;
RAP1B	OLIGO_01044							1.57										RAP1B, member of RAS oncogene family	CR453569	nucleotide binding;GTPase activity;GTPase activity;protein binding;GTP binding;GTP binding;GTP binding;GTP binding;GTP binding;G... <Preview truncated at 128 characters>	signal transduction;small GTPase mediated signal transduction;small GTPase mediated signal transduction;small GTPase mediated si... <Preview truncated at 128 characters>	intracellular;cytoplasm;cytosol;plasma membrane;plasma membrane;membrane;membrane;membrane;membrane;intercellular canaliculus;in... <Preview truncated at 128 characters>
LOC665113	OLIGO_01047								1.82							1.93			CR453574	nucleotide binding;protein kinase activity;protein kinase activity;protein kinase activity;ATP binding;ATP binding;ATP binding;A... <Preview truncated at 128 characters>	protein amino acid phosphorylation;protein amino acid phosphorylation;protein amino acid phosphorylation;protein amino acid phos... <Preview truncated at 128 characters>	cellular_component;
LOC533945	OLIGO_08146				-1.7														CR453663	transcription regulator activity;	regulation of transcription;	nucleus;
MTA1	OLIGO_00810				-1.52													metastasis associated 1	CR453664
LOC441698	OLIGO_11223				-1.84	-1.62													CR453771
ABHD8	OLIGO_00728				1.84													abhydrolase domain containing 8	CR453780	catalytic activity;hydrolase activity;
BHLHB2	OLIGO_10026					1.53	2.55	3.99	5.82				1.61	1.91	1.93	1.63		basic helix-loop-helix domain containing, class B, 2	CR453860
CMTM4	OLIGO_10766								-1.71									CKLF-like MARVEL transmembrane domain containing 4	CR453908			membrane;membrane;integral to membrane;
TPM1	OLIGO_06535							-1.5						1.56		2.18		tropomyosin 1 (alpha)	CR453957	actin binding;	in utero embryonic development;embryonic development;	cytoplasm;cytoplasm;cytoskeleton;cytoskeleton;myofibril;filamentous actin;
MAP4K4	OLIGO_07953								1.62									mitogen-activated protein kinase kinase kinase kinase 4	CR453978
CLK1	OLIGO_06884							1.52										CDC-like kinase 1 (EC:2.7.10.1 2.7.11.1)	CR453979	nucleotide binding;protein kinase activity;protein kinase activity;protein kinase activity;protein serine/threonine kinase activ... <Preview truncated at 128 characters>	protein amino acid phosphorylation;protein amino acid phosphorylation;protein amino acid phosphorylation;protein amino acid phos... <Preview truncated at 128 characters>	nucleus;
PMP22	OLIGO_00600						-1.77	-1.67	-1.75									peripheral myelin protein 22	CR454056		cell cycle;cell cycle arrest;myelin assembly;	membrane;membrane;membrane;membrane;membrane;integral to membrane;
PIK4CA	OLIGO_00705						-2.09											phosphatidylinositol 4-kinase, catalytic, alpha	CR454190	nucleotide binding;inositol or phosphatidylinositol kinase activity;inositol or phosphatidylinositol kinase activity;1-phosphati... <Preview truncated at 128 characters>	phosphoinositide phosphorylation;phosphoinositide-mediated signaling;
ACSL4	OLIGO_11286								1.89									acyl-CoA synthetase long-chain family member 4	CR454195	catalytic activity;long-chain fatty acid-CoA ligase activity;long-chain fatty acid-CoA ligase activity;protein binding;	metabolic process;embryonic process involved in female pregnancy;response to hypoxia;negative regulation of transcription factor... <Preview truncated at 128 characters>	mitochondrion;plasma membrane;
AKT1	OLIGO_10601				-1.71				-2							-2.02		v-akt murine thymoma viral oncogene homolog 1	CR454198			cytoplasm;cytoplasm;ribosome;ribonucleoprotein complex;
FDPS	OLIGO_07336				2.22	1.91			1.52			1.7	1.7			2.51		farnesyl diphosphate synthase (farnesyl pyrophosphate synthetase, dimethylallyltranstransferase, ger	CR454205	dimethylallyltranstransferase activity;geranyltranstransferase activity;transferase activity;metal ion binding;transferase activ... <Preview truncated at 128 characters>	steroid biosynthetic process;cholesterol biosynthetic process;isoprenoid biosynthetic process;isoprenoid biosynthetic process;li... <Preview truncated at 128 characters>	cytoplasm;cytoplasm;
NNAT	OLIGO_11220				1.85													neuronatin	CR454219		multicellular organismal development;
PYCRL	OLIGO_00691				-1.68													pyrroline-5-carboxylate reductase-like	CR454264	catalytic activity;pyrroline-5-carboxylate reductase activity;pyrroline-5-carboxylate reductase activity;binding;oxidoreductase ... <Preview truncated at 128 characters>	proline biosynthetic process;proline biosynthetic process;metabolic process;cellular amino acid biosynthetic process;oxidation r... <Preview truncated at 128 characters>
MUSK	OLIGO_00692				-1.71		1.79											muscle, skeletal, receptor tyrosine kinase	CR454270	G-protein coupled receptor activity;Wnt receptor activity;general transcriptional repressor activity;transcription factor activi... <Preview truncated at 128 characters>	nervous system development;determination of adult lifespan;cell morphogenesis;epithelial cell maturation;salivary gland developm... <Preview truncated at 128 characters>	integral to plasma membrane;integral to membrane;nucleus;membrane;transcription factor complex;nucleus;nucleoplasm;
RBED1	OLIGO_10186		1.51		1.93													RNA binding motif and ELMO domain 1	CR454354		phagocytosis;phagocytosis;	cytoskeleton;cytoskeleton;
KIAA0143	OLIGO_00672						1.58												CR454382
Rhou	OLIGO_06801					-1.53	1.75	1.52						1.95	1.53	1.63		ras homolog gene family, member U	CR454408	nucleotide binding;GTPase activity;protein binding;GTP binding;GTP binding;GTP binding;GTP binding;metal ion binding;	G1/S transition of mitotic cell cycle;small GTPase mediated signal transduction;small GTPase mediated signal transduction;regula... <Preview truncated at 128 characters>	Golgi membrane;podosome;intracellular;Golgi apparatus;plasma membrane;plasma membrane;focal adhesion;membrane;cell junction;cell... <Preview truncated at 128 characters>
SEMA4D	OLIGO_10110							1.5	1.66									sema domain, immunoglobulin domain (Ig), transmembrane domain (TM) and short cytoplasmic domain, (semaphorin) 4D	CR454429	receptor activity;	multicellular organismal development;	<31x31 double>
PCDHGC3	OLIGO_11009						-1.79											protocadherin gamma subfamily C, 3	CR454448	calcium ion binding;calcium ion binding;	cell adhesion;cell adhesion;homophilic cell adhesion;	plasma membrane;plasma membrane;membrane;membrane;membrane;integral to membrane;
BT.64663	OLIGO_11474				-1.51				-1.77										CR454477
FLNB	OLIGO_09845								2.46									filamin B, beta (actin binding protein 278)	CR454496	protein binding;actin binding;protein binding;zinc ion binding;cytidine deaminase activity;	cytoskeletal anchoring at plasma membrane;cytidine to uridine editing;cytidine to uridine editing;lipid metabolic process;mRNA s... <Preview truncated at 128 characters>	stress fiber;focal adhesion;cytoplasm;
CLK3	OLIGO_00765				1.62													CDC-like kinase 3 (EC:2.7.12.1)	CR454535	nucleotide binding;protein kinase activity;protein kinase activity;protein kinase activity;protein serine/threonine kinase activ... <Preview truncated at 128 characters>	protein amino acid phosphorylation;protein amino acid phosphorylation;protein amino acid phosphorylation;protein amino acid phos... <Preview truncated at 128 characters>	acrosomal vesicle;nucleus;nucleus;nucleus;cytoplasm;cytoplasm;cytoplasmic vesicle;
POLR1D	OLIGO_07905				1.6													polymerase (RNA) I polypeptide D, 16kDa	CR454537	DNA binding;DNA binding;DNA-directed RNA polymerase activity;DNA-directed RNA polymerase activity;DNA-directed RNA polymerase ac... <Preview truncated at 128 characters>	transcription;transcription;transcription;transcription;	nucleus;nucleus;DNA-directed RNA polymerase I complex;
SERINC1	OLIGO_10207				1.77														CR454540
Kctd12	OLIGO_10129						1.63	1.89	2.55					1.52		1.78			CR454618
THBS1	OLIGO_07311				1.55	1.72	1.64	2.65	7.99				1.56	1.78		2.58		thrombospondin 1	CR454665	fibronectin binding;integrin binding;structural molecule activity;calcium ion binding;calcium ion binding;heparin binding;hepari... <Preview truncated at 128 characters>	activation of MAPK activity;negative regulation of endothelial cell proliferation;sprouting angiogenesis;chronic inflammatory re... <Preview truncated at 128 characters>	extracellular region;fibrinogen complex;external side of plasma membrane;
ITGB2	OLIGO_11267				-1.82													integrin, beta 2 (complement component 3 receptor 3 and 4 subunit)	CR454674	glycoprotein binding;receptor activity;receptor activity;receptor activity;receptor activity;receptor activity;receptor activity... <Preview truncated at 128 characters>	cell adhesion;cell adhesion;cell adhesion;cell adhesion;cell adhesion;cell adhesion;cell adhesion;cell adhesion;leukocyte cell-c... <Preview truncated at 128 characters>	cytoplasm;integrin complex;integrin complex;integrin complex;integrin complex;integrin complex;integrin complex;integrin complex... <Preview truncated at 128 characters>
PDIA4	OLIGO_11079				-1.82		1.51											protein disulfide isomerase family A, member 4	CR454689	protein disulfide isomerase activity;protein disulfide isomerase activity;protein binding;protein binding;isomerase activity;iso... <Preview truncated at 128 characters>	cell redox homeostasis;cell redox homeostasis;cell redox homeostasis;cell redox homeostasis;cell redox homeostasis;cell redox ho... <Preview truncated at 128 characters>	endoplasmic reticulum;endoplasmic reticulum;endoplasmic reticulum;endoplasmic reticulum lumen;endoplasmic reticulum lumen;melano... <Preview truncated at 128 characters>
CCT6A	OLIGO_06710			1.52	-1.74				-2.03									chaperonin containing TCP1, subunit 6A (zeta 1)	CR454705	RNA binding;mRNA binding;structural constituent of ribosome;structural constituent of ribosome;structural constituent of ribosom... <Preview truncated at 128 characters>	translation;translation;translation;regulation of translational fidelity;	intracellular;ribosome;ribosome;small ribosomal subunit;cytosolic small ribosomal subunit;cytosolic small ribosomal subunit;ribo... <Preview truncated at 128 characters>
CR454755	OLIGO_10142				1.83													Transcribed locus	CR454755
SEPW1	OLIGO_11033				1.8		-1.57											selenoprotein W, muscle 1	CR454769
LTB	OLIGO_10722							1.73										lymphotoxin beta (TNF superfamily, member 3)	CR454815	cytokine activity;tumor necrosis factor receptor binding;tumor necrosis factor receptor binding;tumor necrosis factor receptor b... <Preview truncated at 128 characters>	immune response;immune response;immune response;immune response;	extracellular space;membrane;membrane;membrane;membrane;membrane;
SELP	OLIGO_06557						1.84	2.85	2.7									selectin P (granule membrane protein 140kDa, antigen CD62)	CR454863	binding;binding;binding;binding;sugar binding;binding;binding;binding;binding;sugar binding;	cell adhesion;cell adhesion;cell adhesion;	membrane;membrane;membrane;integral to membrane;membrane;
ZNF367	OLIGO_07395			1.93	-2.54				-1.96										CR455086
PSMC5	OLIGO_11319				-2.21	-1.61												proteasome (prosome, macropain) 26S subunit, ATPase, 5	CR455154	nucleotide binding;nucleotide binding;receptor binding;protein binding;ATP binding;ATP binding;ATP binding;transcription factor ... <Preview truncated at 128 characters>	negative regulation of transcription;protein catabolic process;proteasomal ubiquitin-dependent protein catabolic process;	proteasome complex;proteasome complex;proteasome complex;nucleus;nucleus;nucleus;nucleus;cytoplasm;cytoplasm;cytoplasm;cytoplasm... <Preview truncated at 128 characters>
Rrp9	OLIGO_00828					1.54						1.59	2.19			1.67			CR455156
RPL21	OLIGO_10614		-1.68		-1.93				-1.86									ribosomal protein L21	CR455267	RNA binding;RNA binding;RNA binding;structural constituent of ribosome;structural constituent of ribosome;structural constituent... <Preview truncated at 128 characters>	translation;positive regulation of cell adhesion;anti-apoptosis;positive regulation of cell proliferation;
RPS25	OLIGO_06915				-1.63				-1.75									ribosomal protein S25	CR455450	protein binding;protein binding;RNA binding;		nucleolus;ribosome;ribosome;cytosolic small ribosomal subunit;ribonucleoprotein complex;
CCDC71	OLIGO_00827						-1.68		-1.52										CR455457	DNA binding;
PHGDH	OLIGO_10035				2.36													phosphoglycerate dehydrogenase (EC:1.1.1.95)	CR455498	catalytic activity;phosphoglycerate dehydrogenase activity;phosphoglycerate dehydrogenase activity;phosphoglycerate dehydrogenas... <Preview truncated at 128 characters>	glutamine metabolic process;glycine metabolic process;L-serine biosynthetic process;L-serine biosynthetic process;L-serine biosy... <Preview truncated at 128 characters>
LSM3	OLIGO_10562				1.73													LSM3 homolog, U6 small nuclear RNA associated (S. cerevisiae)	CR455506	RNA binding;protein binding;	mRNA processing;RNA splicing;	nucleus;nucleus;spliceosomal complex;ribonucleoprotein complex;
U2AF2	OLIGO_09406				-1.64				-2.24									U2 small nuclear ribonucleoprotein auxiliary factor (U2AF) 2	CR455529
CCHCR1	OLIGO_00548				-1.62	-1.61													CR455550
LOC513685	OLIGO_00544						-1.67												CR455569
FUNDC1	OLIGO_00545							1.5	2.07									FUN14 domain containing 1	CR455572
FREQ	OLIGO_00405				-1.89				-1.74									frequenin homolog (Drosophila)	CR455604
RPL38	OLIGO_10972				-1.64					1.67								ribosomal protein L38	CR455656	structural constituent of ribosome;protein binding;RNA binding;protein binding;structural constituent of ribosome;arachidonate 5... <Preview truncated at 128 characters>	translation;inflammatory response;positive regulation of vasoconstriction;	intracellular;ribosome;ribosome;ribonucleoprotein complex;cytoplasm;nucleus;nuclear envelope;
LOC51149	OLIGO_08433				-1.56														CR455704
PICALM	OLIGO_07885				1.51			1.74	2.03									phosphatidylinositol binding clathrin assembly protein	CR455769	phospholipid binding;phosphatidylinositol binding;clathrin binding;	axonogenesis;hemopoiesis;clathrin coat assembly;dendrite morphogenesis;	intracellular;clathrin coat;perinuclear region of cytoplasm;
TXN	OLIGO_06245		-1.56		-1.82														CR455817	protein binding;protein binding;peptide disulfide oxidoreductase activity;	negative regulation of transcription from RNA polymerase II promoter;transport;electron transport chain;cell redox homeostasis;c... <Preview truncated at 128 characters>	nucleus;cytoplasm;cytoplasm;mitochondrion;cytosol;
Mtf2	OLIGO_00870				-2.13						1.52				-1.53			metal response element binding transcription factor 2	CR455869	protein binding;zinc ion binding;zinc ion binding;metal ion binding;
LOC515401	OLIGO_00370				-2.29														CR455873	zinc ion binding;metal ion binding;	positive regulation of fibroblast proliferation;	plasma membrane;plasma membrane;focal adhesion;focal adhesion;membrane;cell junction;
CR455918	OLIGO_00487				-1.58														CR455918	nucleotide binding;GTP binding;GTP binding;GTP binding;GTP binding;	actin filament organization;small GTPase mediated signal transduction;small GTPase mediated signal transduction;	intracellular;cytoplasm;cytoskeleton;cytoskeleton;plasma membrane;plasma membrane;membrane;
LOC617776	OLIGO_07858				1.5														CR455970
BT.65577	OLIGO_00442						-1.55												CR455979
Adm	OLIGO_10789							2.37	2.18				1.58		2.44	3.07		adrenomedullin	CR456002	hormone activity;hormone activity;hormone activity;	neural tube closure;heart development;positive regulation of cell proliferation;negative regulation of vasoconstriction;developm... <Preview truncated at 128 characters>	extracellular region;extracellular region;extracellular region;extracellular region;extracellular space;cytoplasm;
GJA1	OLIGO_11052								1.71									gap junction protein, alpha 1, 43kDa	CR456025	signal transducer activity;gap junction channel activity;SH3 domain binding;transmembrane transporter activity;PDZ domain bindin... <Preview truncated at 128 characters>	in utero embryonic development;neuron migration;heart looping;epithelial cell maturation;cell communication;cell communication;c... <Preview truncated at 128 characters>	cytoplasm;lysosome;early endosome;late endosome;multivesicular body;endoplasmic reticulum;plasma membrane;plasma membrane;fascia... <Preview truncated at 128 characters>
KIF19	OLIGO_00526				1.52													kinesin family member 19	CR456050	ATP binding;microtubule motor activity;	microtubule-based movement;	cellular_component;
Antxr2	OLIGO_00995							3.57	5.3				1.56		2.19	2.78		anthrax toxin receptor 2	CR456095	receptor activity;receptor activity;receptor activity;		integral to membrane;integral to membrane;
TARS	OLIGO_00631						1.68	2.21	2.56									threonyl-tRNA synthetase	CR456180	nucleotide binding;nucleotide binding;nucleotide binding;nucleotide binding;aminoacyl-tRNA ligase activity;aminoacyl-tRNA ligase... <Preview truncated at 128 characters>	translation;translation;translation;translation;translation;translation;translation;tRNA aminoacylation for protein translation;... <Preview truncated at 128 characters>	cytoplasm;cytoplasm;cytoplasm;cytoplasm;cytoplasm;cytoplasm;cytoplasm;
TCF8	OLIGO_00415				-1.51														CR456188	NAD-dependent histone deacetylase activity;protein C-terminus binding;histone binding;transcription activator activity;RNA polym... <Preview truncated at 128 characters>	negative regulation of transcription factor activity;negative regulation of helicase activity;negative regulation of DNA damage ... <Preview truncated at 128 characters>	cytoplasm;nucleolus;PML body;cytosol;nucleus;cytoplasm;cytoplasm;nucleus;cell surface;nucleoplasm;cytoplasm;intracellular;
LOC788054	OLIGO_00500				-2.01														CR456282	deaminase activity;	purine ribonucleoside monophosphate biosynthetic process;	extracellular space;
SYF2	OLIGO_00655				-1.95													SYF2 homolog, RNA splicing factor (S. cerevisiae)	CR456299	protein binding;	cell surface receptor linked signaling pathway;energy reserve metabolic process;multicellular organismal development;
NHLH1	OLIGO_00214			1.57	-2.03		1.6											nescient helix loop helix 1	CR550317			transcription factor complex;
HPX	OLIGO_11595				-1.69														CR550328	metal ion binding;	positive regulation of immunoglobulin production;positive regulation of humoral immune response mediated by circulating immunogl... <Preview truncated at 128 characters>	extracellular region;extracellular region;
ZNF509	OLIGO_11643				-2.22		1.71												CR550477
AAAS	OLIGO_00199				-1.62													achalasia, adrenocortical insufficiency, alacrimia	CR550530		learning;fertilization;regulation of nucleocytoplasmic transport;	nuclear pore;nuclear pore;
APRT	OLIGO_11160				-1.72													adenine phosphoribosyltransferase	CR550676	adenine binding;adenine phosphoribosyltransferase activity;adenine phosphoribosyltransferase activity;adenine phosphoribosyltran... <Preview truncated at 128 characters>	purine ribonucleoside salvage;purine ribonucleoside salvage;adenine salvage;adenine salvage;grooming behavior;nucleoside metabol... <Preview truncated at 128 characters>	cytoplasm;cytoplasm;cytoplasm;
CR550717	OLIGO_11558				-2.27		1.73		-1.53										CR550717
EIF2S1	OLIGO_07645				-2.29					1.54		-1.9		1.86		2.34		eukaryotic translation initiation factor 2, subunit 1 alpha, 35kDa	CR550725	RNA binding;RNA binding;RNA binding;translation initiation factor activity;translation initiation factor activity;translation in... <Preview truncated at 128 characters>	translation;translation;translation;regulation of translation;regulation of translational initiation in response to stress;regul... <Preview truncated at 128 characters>	nucleus;nucleus;cytoplasm;cytoplasm;eukaryotic translation initiation factor 2 complex;eukaryotic translation initiation factor ... <Preview truncated at 128 characters>
LOC509824	OLIGO_06584							-1.73											CR550786
LOC528615	OLIGO_00152				-1.6	-1.78													CR550798	heat shock protein binding;heat shock protein binding;heat shock protein binding;heat shock protein binding;metal ion binding;un... <Preview truncated at 128 characters>	protein folding;protein folding;protein folding;protein folding;protein folding;
Bt.30596	OLIGO_06625				-3.28						1.98	-2.83		2.01					CR550811
EEF1A2	OLIGO_00294				-2.35					1.58	1.9			-2.41	-1.57			eukaryotic translation elongation factor 1 alpha 2	CR550906	nucleotide binding;translation elongation factor activity;translation elongation factor activity;GTPase activity;protein binding... <Preview truncated at 128 characters>	translation;translational elongation;	nucleus;nucleus;cytoplasm;
CSPG2	OLIGO_06818				-1.82													versican	CR551059
H3F3A	OLIGO_11224				1.57													H3 histone, family 3A	CR551100
RAI14	OLIGO_00274							1.56										retinoic acid induced 14	CR551108
TCL1B	OLIGO_06807			1.55	-2.08				-1.74										CR551120
Ldlr	OLIGO_10415								1.73							1.54		low density lipoprotein receptor	CR551180	receptor activity;low-density lipoprotein receptor activity;low-density lipoprotein receptor activity;very-low-density lipoprote... <Preview truncated at 128 characters>	lipid metabolic process;lipid metabolic process;transport;lipid transport;endocytosis;steroid metabolic process;cholesterol meta... <Preview truncated at 128 characters>	endosome;coated pit;coated pit;membrane;membrane;membrane;integral to membrane;low-density lipoprotein particle;plasma membrane;... <Preview truncated at 128 characters>
HBA1	OLIGO_10494				1.83													hemoglobin, alpha 1	CR551215	oxygen transporter activity;iron ion binding;iron ion binding;iron ion binding;protein binding;oxygen binding;oxygen binding;hem... <Preview truncated at 128 characters>	transport;oxygen transport;oxygen transport;oxygen transport;	hemoglobin complex;hemoglobin complex;
RNPEP	OLIGO_11226						-1.87											arginyl aminopeptidase (aminopeptidase B) (EC:3.4.11.6)	CR551230	aminopeptidase activity;aminopeptidase activity;binding;metallopeptidase activity;metallopeptidase activity;zinc ion binding;zin... <Preview truncated at 128 characters>	proteolysis;leukotriene biosynthetic process;protein processing;	extracellular region;extracellular space;plasma membrane;Golgi apparatus;extracellular region;plasma membrane;
SNAPC3	OLIGO_00308				-1.76													small nuclear RNA activating complex, polypeptide 3	CR551278	DNA binding;protein binding;DNA binding;	transcription;regulation of transcription;transcription from RNA polymerase II promoter;transcription from RNA polymerase III pr... <Preview truncated at 128 characters>	nucleus;nucleus;nucleus;
S100A12	OLIGO_10514								1.63									S100 calcium binding protein A12	CR551287	calcium ion binding;calcium ion binding;protein binding;protein binding;drug binding;metal ion binding;RAGE receptor binding;	xenobiotic metabolic process;inflammatory response;mast cell degranulation;defense response to fungus;	nucleus;nucleolus;cytoplasm;plasma membrane;
Bt.9841	OLIGO_00242						1.61	2.77	2.72				2.02	1.64	1.87	2.16			CR551429
Ifit3	OLIGO_06791							1.67	2.47						1.51	2.05		interferon-induced protein with tetratricopeptide repeats 3	CR551481	binding;
HCCS	OLIGO_06797				1.5													holocytochrome c synthetase	CR551492	holocytochrome-c synthase activity;holocytochrome-c synthase activity;lyase activity;metal ion binding;		mitochondrion;mitochondrion;mitochondrion;mitochondrion;mitochondrial inner membrane;mitochondrial inner membrane;membrane;
LOC129607	OLIGO_00334							1.71								1.61			CR551577
RPLP0	OLIGO_10501				1.74														CR551597	structural constituent of ribosome;RNA binding;protein binding;structural constituent of ribosome;	translational elongation;ribosome biogenesis;ribosome biogenesis;	intracellular;intracellular;cytoplasm;cytoplasm;ribosome;ribosome;ribonucleoprotein complex;ribonucleoprotein complex;intracellu... <Preview truncated at 128 characters>
CR551660	OLIGO_00286				1.51														CR551660
BT.27122	OLIGO_00287				1.51														CR551684
LOC616217	OLIGO_06695				1.5														CR551721	zinc ion binding;	biological_process;	intracellular;
ARID4A	OLIGO_00256				1.59		-2.02		1.59									AT rich interactive domain 4A (RBP1-like)	CR551781	transcription factor activity;transcription factor activity;transcription factor activity;protein binding;peptidase activator ac... <Preview truncated at 128 characters>	transcription from RNA polymerase II promoter;cell-substrate junction assembly;wound healing;cell adhesion;wound healing;cell ad... <Preview truncated at 128 characters>	nucleus;basement membrane;apical plasma membrane;basement membrane;apical plasma membrane;
LOC613439	OLIGO_01171				-2.2		1.72		-1.63										CR551872
ARHGEF15	OLIGO_01205				-1.76	-1.62													CR552029	Rho guanyl-nucleotide exchange factor activity;	regulation of Rho protein signal transduction;	intracellular;
UBAP1	OLIGO_01239								1.79									ubiquitin associated protein 1	CR552058			cytoplasm;
Gng5	OLIGO_01147								1.83				2.01					guanine nucleotide binding protein (G protein), gamma 5	CR552355	signal transducer activity;signal transducer activity;signal transducer activity;	signal transduction;G-protein coupled receptor protein signaling pathway;G-protein coupled receptor protein signaling pathway;	mitochondrion;heterotrimeric G-protein complex;heterotrimeric G-protein complex;plasma membrane;plasma membrane;membrane;
PLEKHH3	OLIGO_01135				2.18													pleckstrin homology domain containing, family H (with MyTH4 domain) member 3	CR552388	hydrolase activity, hydrolyzing O-glycosyl compounds;	carbohydrate metabolic process;	cytoskeleton;
LOC508663	OLIGO_06976		1.55		1.83						-1.56								CR552443	protein binding;zinc ion binding;zinc ion binding;		intracellular;intracellular;
CR552488	OLIGO_10537				-2.16				-1.78									Transcribed locus	CR552488
SPSB2	OLIGO_01157				-2													splA/ryanodine receptor domain and SOCS box containing 2	CR552633	receptor activity;
LOC510833	OLIGO_10553							2.07							1.76				CR552676	extracellular matrix structural constituent;extracellular matrix structural constituent;SMAD binding;platelet-derived growth fac... <Preview truncated at 128 characters>	blood vessel development;cell-matrix adhesion;transforming growth factor beta receptor signaling pathway;integrin-mediated signa... <Preview truncated at 128 characters>	extracellular region;proteinaceous extracellular matrix;proteinaceous extracellular matrix;collagen;collagen;collagen type III;
ATP13A3	OLIGO_07118						1.68	1.71	1.67										CR552826
MSH3	OLIGO_01310							1.5										mutS homolog 3 (E. coli)	CR552847	DNA binding;ATP binding;ATP binding;ATP binding;ATP binding;ATP binding;ATP binding;mismatched DNA binding;mismatched DNA bindin... <Preview truncated at 128 characters>	mismatch repair;mismatch repair;mismatch repair;mismatch repair;mismatch repair;mismatch repair;mismatch repair;mismatch repair;
TRAPPC2L	OLIGO_11005						-1.53												CR552907		transport;transport;ER to Golgi vesicle-mediated transport;vesicle-mediated transport;	intracellular;cytoplasm;endoplasmic reticulum;endoplasmic reticulum;Golgi apparatus;Golgi apparatus;perinuclear region of cytopl... <Preview truncated at 128 characters>
SUPT5H	OLIGO_07093				-1.92				-1.53									suppressor of Ty 5 homolog (S. cerevisiae)	CR552967	transcription elongation regulator activity;transcription elongation regulator activity;	regulation of transcription from RNA polymerase II promoter;positive regulation of RNA elongation from RNA polymerase II promote... <Preview truncated at 128 characters>
NDUFS7	OLIGO_06703						-1.63											NADH dehydrogenase (ubiquinone) Fe-S protein 7, 20kDa (NADH-coenzyme Q reductase)	CR552975	NADH dehydrogenase activity;NADH dehydrogenase (ubiquinone) activity;NADH dehydrogenase (ubiquinone) activity;NADH dehydrogenase... <Preview truncated at 128 characters>	transport;electron transport chain;mitochondrial respiratory chain complex I assembly;oxidation reduction;oxidation reduction;ox... <Preview truncated at 128 characters>	mitochondrion;mitochondrion;mitochondrion;mitochondrial inner membrane;mitochondrial respiratory chain complex I;respiratory cha... <Preview truncated at 128 characters>
MALAT1	OLIGO_07141				-1.99														CR553014
HMGCR	OLIGO_07143				1.71				1.6									3-hydroxy-3-methylglutaryl-Coenzyme A reductase	CR553026	hydroxymethylglutaryl-CoA reductase (NADPH) activity;hydroxymethylglutaryl-CoA reductase (NADPH) activity;hydroxymethylglutaryl-... <Preview truncated at 128 characters>	cholesterol biosynthetic process;isoprenoid biosynthetic process;isoprenoid biosynthetic process;visual learning;embryonic devel... <Preview truncated at 128 characters>	endoplasmic reticulum membrane;microsome;integral to membrane;integral to membrane;
TGFBI	OLIGO_01303								1.84							1.63		transforming growth factor, beta-induced, 68kDa	CR553272	extracellular matrix binding;	cell adhesion;extracellular matrix organization;	proteinaceous extracellular matrix;extracellular space;
SIKE	OLIGO_07071				1.64													suppressor of IKK epsilon	CR553356			cytoplasm;cytoplasm;
LOC404122	OLIGO_10607								2.45				1.75			2.03		no description	CR553471	nucleotide binding;structural constituent of cytoskeleton;protein binding;ATP binding;ATP binding;identical protein binding;	sarcomere organization;	soluble fraction;cytoplasm;cytosol;cytoskeleton;cytoskeleton;actin cytoskeleton;cortical cytoskeleton;filamentous actin;
RTN2	OLIGO_07015							-1.52										reticulon 2 (Z-band associated protein)	CR553476			endoplasmic reticulum;endoplasmic reticulum;
TARBP2	OLIGO_07048				1.87													TAR (HIV-1) RNA binding protein 2	CR553568	RNA binding;RNA binding;double-stranded RNA binding;protein binding;siRNA binding;siRNA binding;protein homodimerization activit... <Preview truncated at 128 characters>	regulation of translation;production of siRNA involved in RNA interference;production of siRNA involved in RNA interference;targ... <Preview truncated at 128 characters>	intracellular;intracellular;nucleus;nucleus;cytoplasm;cytoplasm;cytoplasm;cytoplasm;RNA-induced silencing complex;RNA-induced si... <Preview truncated at 128 characters>
PSMA2	OLIGO_11102				-1.76													proteasome (prosome, macropain) subunit, alpha type, 2 (EC:3.4.25.1)	CR553773	endopeptidase activity;threonine-type endopeptidase activity;threonine-type endopeptidase activity;protein binding;peptidase act... <Preview truncated at 128 characters>	ubiquitin-dependent protein catabolic process;response to virus;proteolysis involved in cellular protein catabolic process;natur... <Preview truncated at 128 characters>	proteasome complex;nucleus;nucleus;cytoplasm;cytoplasm;proteasome core complex;proteasome core complex, alpha-subunit complex;de... <Preview truncated at 128 characters>
REEP4	OLIGO_07085				1.67													receptor accessory protein 4	CR553790			membrane;membrane;integral to membrane;
GAS5	OLIGO_07086							1.54										growth arrest specific 5	CR553795
PAFAH1B3	OLIGO_10550				1.78													platelet-activating factor acetylhydrolase, isoform Ib, gamma subunit 29kDa	CR553886	1-alkyl-2-acetylglycerophosphocholine esterase activity;protein binding;protein binding;protein binding;hydrolase activity;hydro... <Preview truncated at 128 characters>	spermatogenesis;spermatogenesis;lipid catabolic process;	cytoplasm;cytoplasm;cytoplasm;cytoplasm;
CHMP2A	OLIGO_06940				-1.84														CR553910	protein domain specific binding;	protein transport;	cytosol;
BT.33148	OLIGO_01182				-2.54	-1.59	1.51												CR553920
TCAP	OLIGO_05861				-1.65													titin-cap (telethonin)	CV798706	titin binding;protein N-terminus binding;titin Z domain binding;	somitogenesis;skeletal muscle contraction;adult heart development;adult heart development;skeletal muscle thin filament assembly... <Preview truncated at 128 characters>	cytoplasm;sarcomere;Z disc;Z disc;
KLF10	OLIGO_10356								1.69										CV798719	nucleic acid binding;protein binding;zinc ion binding;zinc ion binding;	bone mineralization;regulation of transcription;positive regulation of osteoclast differentiation;response to protein stimulus;g... <Preview truncated at 128 characters>	intracellular;intracellular;membrane fraction;cytosol;nucleus;membrane raft;membrane raft;cytosol;
GVIN1	OLIGO_05858							2.83	1.8										CV798732
ALS2CR2	OLIGO_05840				1.67														CV798744
SNAI2	OLIGO_05855								2.13									snail homolog 2 (Drosophila)	CV798788	nucleic acid binding;DNA binding;zinc ion binding;zinc ion binding;metal ion binding;	transcription;multicellular organismal development;response to radiation;regulation of transcription;	intracellular;intracellular;nucleus;nucleus;nucleus;
Dhx36	OLIGO_08741				-1.55											1.92		DEAH (Asp-Glu-Ala-His) box polypeptide 36	CV798789	nucleotide binding;nucleic acid binding;nucleic acid binding;nucleic acid binding;helicase activity;helicase activity;helicase a... <Preview truncated at 128 characters>
PRRT2	OLIGO_05890							-1.53										proline-rich transmembrane protein 2	CV798794
PRKACB	OLIGO_05881								-1.74									protein kinase, cAMP-dependent, catalytic, beta	CV798801	nucleotide binding;protein kinase activity;protein kinase activity;protein kinase activity;protein serine/threonine kinase activ... <Preview truncated at 128 characters>	mesoderm formation;protein amino acid phosphorylation;protein amino acid phosphorylation;protein amino acid phosphorylation;prot... <Preview truncated at 128 characters>	membrane fraction;nucleus;nucleus;nucleus;cytoplasm;cytoplasm;cytoplasm;mitochondrion;plasma membrane;neuromuscular junction;mem... <Preview truncated at 128 characters>
MX2	OLIGO_05879							2.8	2.76				1.92		1.62	2.51		myxovirus (influenza virus) resistance 2 (mouse)	CV798806	nucleotide binding;GTPase activity;GTPase activity;GTP binding;GTP binding;GTP binding;GTP binding;	response to virus;	cytoplasm;cytoplasm;
Slc34a2	OLIGO_05862				-1.96			-3.44	-8.44						-2.26	-2.76		solute carrier family 34 (sodium phosphate), member 2	CV798808	sodium:phosphate symporter activity;symporter activity;sodium-dependent phosphate transmembrane transporter activity;sodium-depe... <Preview truncated at 128 characters>	in utero embryonic development;transport;ion transport;sodium ion transport;phosphate transport;phosphate transport;phosphate tr... <Preview truncated at 128 characters>	brush border;membrane;membrane;membrane;integral to membrane;integral to membrane;apical plasma membrane;apical plasma membrane;
MAF	OLIGO_05865				-1.53		-1.62	-1.51	-2.95									v-maf musculoaponeurotic fibrosarcoma oncogene homolog (avian)	CV798817	DNA binding;DNA binding;DNA binding;transcription factor activity;transcription factor activity;protein binding;sequence-specifi... <Preview truncated at 128 characters>	cytokine production;transcription;regulation of transcription, DNA-dependent;regulation of transcription, DNA-dependent;regulati... <Preview truncated at 128 characters>	nucleus;nucleus;nucleus;nucleus;cytoplasm;
C5ORF32	OLIGO_08967							1.61	1.99										CV798858
APBA2BP	OLIGO_05877				1.66													N-terminal EF-hand calcium binding protein 3	CV798864	calcium ion binding;oxidoreductase activity;	antibiotic biosynthetic process;protein metabolic process;regulation of amyloid precursor protein biosynthetic process;	Golgi cis cisterna;Golgi cis cisterna;cytoplasm;cytoplasm;endoplasmic reticulum;endoplasmic reticulum membrane;Golgi apparatus;G... <Preview truncated at 128 characters>
C16ORF46	OLIGO_05870								1.65										CV798876
MGC142651	OLIGO_10440						1.67	2.32	3.08					1.52	1.68	1.74			CV974894	protein binding;protein heterodimerization activity;protein N-terminus binding;protein binding;protein heterodimerization activi... <Preview truncated at 128 characters>	Ras protein signal transduction;Ras protein signal transduction;
GYG2	OLIGO_11354				-2														DR697327	transferase activity, transferring glycosyl groups;	biological_process;	cellular_component;
EPAS1	OLIGO_08377								1.54							1.61		endothelial PAS domain protein 1	DR697405	DNA binding;transcription factor activity;transcription factor activity;signal transducer activity;transcription factor binding;... <Preview truncated at 128 characters>	angiogenesis;response to hypoxia;response to hypoxia;embryonic placenta development;blood vessel remodeling;regulation of heart ... <Preview truncated at 128 characters>	nucleus;nucleus;nucleus;nucleus;transcription factor complex;transcription factor complex;cytoplasm;nucleus;nucleus;nucleus;nucl... <Preview truncated at 128 characters>
XRCC1	OLIGO_03971				-1.92						1.7							X-ray repair complementing defective repair in Chinese hamster cells 1	DR697420	damaged DNA binding;protein binding;	single strand break repair;response to electrical stimulus;bleb assembly;response to protein stimulus;T cell proliferation;	nucleus;cell-cell junction;
NP	OLIGO_08946							1.95	4.24									nucleoside phosphorylase	DR697447	purine-nucleoside phosphorylase activity;	nucleobase, nucleoside, nucleotide and nucleic acid metabolic process;
DR697474	OLIGO_05096				-2.02				-1.97									NLR family, pyrin domain containing 13	DR697474
DR697477	OLIGO_05097			1.58	-1.63						1.78								DR697477
LOC534258	OLIGO_11619				-1.77														DR697482
CRISPLD2	OLIGO_11625								1.5										DR697491	heparin binding;	extracellular matrix organization;	extracellular region;extracellular region;extracellular region;extracellular region;transport vesicle;extracellular matrix;extra... <Preview truncated at 128 characters>
RFTN1	OLIGO_10422				2.39														DR697497
LOC615027	OLIGO_08786				1.56														DR697499
DR697510	OLIGO_07585				-1.69														DR697510
LOC285636	OLIGO_11630		-1.55																DR697536
LOC523542	OLIGO_11532				-1.65													no description	DR697548	nucleotide binding;protein kinase activity;protein kinase activity;protein kinase activity;protein kinase activity;protein kinas... <Preview truncated at 128 characters>	protein amino acid phosphorylation;protein amino acid phosphorylation;protein amino acid phosphorylation;protein amino acid phos... <Preview truncated at 128 characters>	nucleus;nucleus;nucleus;cytoplasm;cytoplasm;
PARP14	OLIGO_10864							1.55	1.54									he37b05x1 NCI_CGAP_CML1 cDNA clone IMAGE:2921169 3 similar to contains Alu repetitive element;contains element LTR4 repetitive ... <Preview truncated at 128 characters>	DR697561	NAD+ ADP-ribosyltransferase activity;protein binding;NAD+ ADP-ribosyltransferase activity;protein binding;	locomotory behavior;
PPL	OLIGO_08384				1.61													periplakin	DR697599
LOC390660	OLIGO_10371				-1.54				-1.56										DR697615
Lrp8	OLIGO_06049								1.57							1.82		low density lipoprotein receptor-related protein 8, apolipoprotein e receptor	DR697650	receptor activity;calcium ion binding;calcium ion binding;		membrane;membrane;integral to membrane;
LOC788514	OLIGO_06151				1.61														DR697656
ZCCHC17	OLIGO_05163				1.58														DR697663	nucleic acid binding;RNA binding;zinc ion binding;
COQ10B	OLIGO_05168						1.54											coenzyme Q10 homolog B (S. cerevisiae)	DR697667			mitochondrion;
SH3PXD2A	OLIGO_05170				1.54														DR697668
RAP1A	OLIGO_03920				1.74			1.67										RAP1A, member of RAS oncogene family	DR697686	nucleotide binding;GTPase activity;GTPase activity;protein binding;protein binding;GTP binding;GTP binding;GTP binding;GTP bindi... <Preview truncated at 128 characters>	signal transduction;small GTPase mediated signal transduction;small GTPase mediated signal transduction;small GTPase mediated si... <Preview truncated at 128 characters>	intracellular;plasma membrane;plasma membrane;membrane;membrane;guanyl-nucleotide exchange factor complex;
ARHGEF10L	OLIGO_03948				-1.74													Rho guanine nucleotide exchange factor (GEF) 10-like	DR697717	guanyl-nucleotide exchange factor activity;Rho guanyl-nucleotide exchange factor activity;	regulation of Rho protein signal transduction;	intracellular;cytoplasm;cytoplasm;
MGC134340	OLIGO_11686						-1.56												DR749209
BT.64866	OLIGO_11687				1.72														DR749211
PDPN	OLIGO_10437				2.04	1.54	1.96	2.26	3.05					1.83		1.7			DR749212
MIA	OLIGO_08266				-2.55													melanoma inhibitory activity	DR749213	growth factor activity;		extracellular region;extracellular region;
LOC505890	OLIGO_09975			1.87			1.89	2.49											DR749215
LOC515401	OLIGO_08543						-2.13												DR749232	zinc ion binding;metal ion binding;	positive regulation of fibroblast proliferation;	plasma membrane;plasma membrane;focal adhesion;focal adhesion;membrane;cell junction;
OAS1	OLIGO_11698		-1.51				1.9	2.47	2.2					1.69	1.7	1.77		2,5-oligoadenylate synthetase 1, 40/46kDa	DR749237	RNA binding;RNA binding;ATP binding;ATP binding;transferase activity;transferase activity;nucleotidyltransferase activity;RNA bi... <Preview truncated at 128 characters>	immune response;immune response;immune response;immune response;immune response;immune response;
BT.22452	OLIGO_10966								-1.79										DR749244
LOC540664	OLIGO_09978								1.76										DR749288	receptor binding;	signal transduction;cell adhesion;
DR749300	OLIGO_09274				1.5														DR749300
BT.64984	OLIGO_06208					-1.66													DR749302	protein binding;	regulation of cell growth;	nucleus;
SSH1	OLIGO_11628							1.78	1.78									slingshot homolog 1 (Drosophila)	DR749329
RBMS2	OLIGO_06318				1.81														DR749353	nucleotide binding;nucleic acid binding;RNA binding;RNA binding;		nucleus;nucleus;
DR749361	OLIGO_10867								1.92									Chloride intracellular channel 4	DR749361	ion channel activity;voltage-gated ion channel activity;voltage-gated chloride channel activity;chloride channel activity;	transport;ion transport;chloride transport;negative regulation of cell migration;cell differentiation;negative regulation of cel... <Preview truncated at 128 characters>	intracellular;soluble fraction;cytoplasm;cytoplasm;cytoplasm;mitochondrion;microvillus;membrane;membrane;membrane;integral to me... <Preview truncated at 128 characters>
BT.6069	OLIGO_11737						1.66												DR749367
C14ORF147	OLIGO_11750							1.79	1.52										DR749402
TAPBP	OLIGO_11760			1.54	-1.63													TAP binding protein (tapasin)	DR749426		antigen processing and presentation of exogenous peptide antigen via MHC class I, TAP-dependent;defense response;antigen process... <Preview truncated at 128 characters>	<31x31 double>
BT.3606	OLIGO_10904							1.65	1.96										DR749437	Rab GTPase activator activity;	regulation of Rab GTPase activity;	intracellular;
MCOLN1	OLIGO_11579						-2.56											mucolipin 1	DR749441
MGC127067	OLIGO_11642				-1.96				-2.01										DR749442	nucleotide binding;nucleotide binding;metalloendopeptidase activity;metalloendopeptidase activity;metalloendopeptidase activity;... <Preview truncated at 128 characters>	proteolysis;axonogenesis;neuromuscular junction development;death;nerve development;protein catabolic process;regulation of mult... <Preview truncated at 128 characters>	mitochondrion;mitochondrion;mitochondrion;mitochondrial inner membrane;membrane;membrane;integral to membrane;integral to membra... <Preview truncated at 128 characters>
PFKFB3	OLIGO_10833							1.81	2.71									6-phosphofructo-2-kinase/fructose-2,6-biphosphatase 3	DR749445	nucleotide binding;catalytic activity;catalytic activity;catalytic activity;6-phosphofructo-2-kinase activity;6-phosphofructo-2-... <Preview truncated at 128 characters>	fructose metabolic process;fructose 2,6-bisphosphate metabolic process;metabolic process;fructose metabolic process;fructose 2,6... <Preview truncated at 128 characters>
DR749446	OLIGO_09556				1.97													Transcribed locus	DR749446
MGC133516	OLIGO_09560				1.5														DR749461
ITGA2	OLIGO_10325						2.11	2.05	3.51						1.75			integrin, alpha 2 (CD49B, alpha 2 subunit of VLA-2 receptor)	L25886	receptor activity;identical protein binding;identical protein binding;collagen binding;collagen binding;integrin binding;collage... <Preview truncated at 128 characters>	cell adhesion;cell adhesion;integrin-mediated signaling pathway;cell-matrix adhesion;blood coagulation;organ morphogenesis;cell-... <Preview truncated at 128 characters>	integrin complex;external side of plasma membrane;membrane;membrane;integral to membrane;plasma membrane;plasma membrane;extrace... <Preview truncated at 128 characters>
NRXN3	OLIGO_10326				1.61													neurexin 3	L27869	molecular_function;	cell adhesion;biological_process;	extracellular region;extracellular region;plasma membrane;plasma membrane;membrane;integral to membrane;membrane;integral to mem... <Preview truncated at 128 characters>
USF1	OLIGO_11800				1.51													upstream transcription factor 1	NM_001001161	DNA binding;transcription regulator activity;transcription regulator activity;	transcription;regulation of transcription;regulation of transcription;regulation of transcription;	nucleus;nucleus;nucleus;
APOC3	OLIGO_11804				-2.05	-1.52	-1.88	-2.13	-9.52									apolipoprotein C-III	NM_001001175
CD5	OLIGO_11820				-1.64													CD5 molecule	NM_173899	scavenger receptor activity;scavenger receptor activity;	induction of apoptosis by extracellular signals;T cell costimulation;	plasma membrane;external side of plasma membrane;membrane;membrane;membrane;membrane;membrane;integral to membrane;
LIF	OLIGO_11837							1.87	2.99									leukemia inhibitory factor (cholinergic differentiation factor)	NM_173931	cytokine activity;cytokine activity;cytokine activity;cytokine activity;leukemia inhibitory factor receptor binding;leukemia inh... <Preview truncated at 128 characters>	immune response;immune response;embryo implantation;positive regulation of cell proliferation;positive regulation of cell prolif... <Preview truncated at 128 characters>	extracellular region;extracellular region;extracellular region;extracellular region;extracellular region;extracellular space;
NPB	OLIGO_11842				-1.76				-1.58									neuropeptide B	NM_173944	protein binding;	neuropeptide signaling pathway;	extracellular region;extracellular region;
Ager	OLIGO_11858			1.88							1.98	-1.58	-1.5					advanced glycosylation end product-specific receptor	NM_173982	protein binding;protein binding;receptor activity;protein binding;protein binding;receptor activity;protein binding;protein bind... <Preview truncated at 128 characters>	inflammatory response;regulation of inflammatory response;induction of positive chemotaxis;regulation of inflammatory response;i... <Preview truncated at 128 characters>	membrane;membrane;integral to membrane;
CCL8	OLIGO_11866					2.07	3.28	3.86	4.79	1.79	1.76		2.29	1.77	2.46			chemokine (C-C motif) ligand 8	NM_174007	cytokine activity;chemokine activity;chemokine activity;heparin binding;signal transducer activity;chemokine activity;	chemotaxis;inflammatory response;immune response;immune response;calcium ion transport;exocytosis;signal transduction;cell-cell ... <Preview truncated at 128 characters>	extracellular region;extracellular region;extracellular region;extracellular region;extracellular space;
CD69	OLIGO_11869						1.51	1.64	2.23		1.51							CD69 molecule	NM_174014	binding;binding;binding;		external side of plasma membrane;
FGF2	OLIGO_11884							2.37	2						1.62			fibroblast growth factor 2 (basic)	NM_174056	fibroblast growth factor receptor binding;fibroblast growth factor receptor binding;voltage-gated calcium channel activity;prote... <Preview truncated at 128 characters>	activation of MAPKK activity;activation of MAPKK activity;nuclear translocation of MAPK;angiogenesis;angiogenesis;branching invo... <Preview truncated at 128 characters>	extracellular space;extracellular space;
GLRB	OLIGO_11892		1.73	1.67	2.79	3.19	1.73		1.7	1.85	1.68	2.18				2.12		glycine receptor, beta	NM_174071	receptor activity;ion channel activity;extracellular ligand-gated ion channel activity;extracellular ligand-gated ion channel ac... <Preview truncated at 128 characters>	startle response;startle response;transport;transport;ion transport;ion transport;ion transport;ion transport;ion transport;ion ... <Preview truncated at 128 characters>	membrane fraction;plasma membrane;plasma membrane;membrane;membrane;membrane;integral to membrane;integral to membrane;integral ... <Preview truncated at 128 characters>
IFNG	OLIGO_11899						1.95	5.86	7.91						2.57	2.03		interferon, gamma	NM_174086	cytokine activity;cytokine activity;interferon-gamma receptor binding;	protein import into nucleus, translocation;neutrophil apoptosis;inflammatory cell apoptosis;immune response;cell cycle arrest;re... <Preview truncated at 128 characters>	extracellular region;extracellular region;extracellular region;extracellular space;extracellular space;
IL1B	OLIGO_11903						3.78	4.94	8.95					1.64	2.28	1.68		interleukin 1, beta	NM_174093	cytokine activity;cytokine activity;cytokine activity;interleukin-1 receptor binding;interleukin-1 receptor binding;interleukin-... <Preview truncated at 128 characters>	activation of MAPK activity;fever;anti-apoptosis;inflammatory response;inflammatory response;inflammatory response;inflammatory ... <Preview truncated at 128 characters>	extracellular region;extracellular region;extracellular region;extracellular region;extracellular space;extracellular space;extr... <Preview truncated at 128 characters>
MYOC	OLIGO_11912								1.67									myocilin	NM_174118			extracellular region;extracellular region;extracellular space;extracellular space;endoplasmic reticulum;rough endoplasmic reticu... <Preview truncated at 128 characters>
OLR1	OLIGO_11919								1.79									oxidized low density lipoprotein (lectin-like) receptor 1	NM_174132	receptor activity;low-density lipoprotein receptor activity;binding;binding;binding;sugar binding;sugar binding;receptor activit... <Preview truncated at 128 characters>	inflammatory response;cell adhesion;	extracellular region;extracellular region;plasma membrane;plasma membrane;membrane;integral to membrane;
TLR4	OLIGO_11941							2.33	2.71									toll-like receptor 4	NM_174198	lipopolysaccharide receptor activity;lipopolysaccharide receptor activity;receptor activity;transmembrane receptor activity;tran... <Preview truncated at 128 characters>	activation of innate immune response;production of nitric oxide involved in inflammatory response;inflammatory response;immune r... <Preview truncated at 128 characters>	cytoplasm;plasma membrane;integral to plasma membrane;external side of plasma membrane;membrane;membrane;integral to membrane;in... <Preview truncated at 128 characters>
UACA	OLIGO_11948							-1.57	-1.6										NM_174209			nucleus;nucleus;cytoplasm;cytoplasm;cytoskeleton;cytoskeleton;extracellular region;
CCL20	OLIGO_11976					2.36	2.04				2.54	1.89						chemokine (C-C motif) ligand 20	NM_174263	cytokine activity;chemokine activity;chemokine activity;	chemotaxis;inflammatory response;immune response;immune response;	extracellular region;extracellular region;extracellular region;extracellular region;extracellular space;
CD79A	OLIGO_11979				-2.16				-2.18		1.92					-1.86		CD79a molecule, immunoglobulin-associated alpha	NM_174266	transmembrane receptor activity;protein binding;	cell surface receptor linked signaling pathway;B cell differentiation;B cell differentiation;B cell proliferation;B cell prolife... <Preview truncated at 128 characters>	multivesicular body;multivesicular body;plasma membrane;plasma membrane;external side of plasma membrane;external side of plasma... <Preview truncated at 128 characters>
CREB1	OLIGO_11989				-1.5	-1.65												cAMP responsive element binding protein 1	NM_174285	DNA binding;DNA binding;transcription factor activity;transcription factor activity;transcription factor activity;protein bindin... <Preview truncated at 128 characters>	transcription;regulation of transcription, DNA-dependent;regulation of transcription, DNA-dependent;regulation of transcription,... <Preview truncated at 128 characters>	nucleus;nucleus;nucleus;nucleus;nucleus;
CXCL6	OLIGO_11995					1.79	2.88	5.16	4.92		1.67		1.62	2.42	2.98	2.35		chemokine (C-X-C motif) ligand 6 (granulocyte chemotactic protein 2)	NM_174300
EDNRB	OLIGO_12001						1.51		1.86									endothelin receptor type B	NM_174309	endothelin-B receptor activity;endothelin-B receptor activity;signal transducer activity;receptor activity;G-protein coupled rec... <Preview truncated at 128 characters>	neural crest cell migration;regulation of pH;signal transduction;G-protein coupled receptor protein signaling pathway;G-protein ... <Preview truncated at 128 characters>	plasma membrane;plasma membrane;membrane;integral to membrane;integral to membrane;integral to membrane;integral to membrane;
EIF4E	OLIGO_12002								1.59									eukaryotic translation initiation factor 4E	NM_174310	RNA binding;RNA binding;RNA binding;translation initiation factor activity;translation initiation factor activity;translation in... <Preview truncated at 128 characters>	translation;translational initiation;translational initiation;regulation of translation;	cytoplasm;cytoplasm;cytoplasm;mRNA cap binding complex;
GLRA1	OLIGO_12005					-1.56	-1.76	-1.88	-1.99	-1.51			-1.96					glycine receptor, alpha 1	NM_174321	receptor activity;ion channel activity;extracellular ligand-gated ion channel activity;extracellular ligand-gated ion channel ac... <Preview truncated at 128 characters>	regulation of action potential;startle response;startle response;startle response;regulation of respiratory gaseous exchange by ... <Preview truncated at 128 characters>	intracellular;membrane fraction;plasma membrane;plasma membrane;integral to plasma membrane;external side of plasma membrane;mem... <Preview truncated at 128 characters>
HCBP6	OLIGO_12013				-2.12														NM_174338
HSPA2	OLIGO_12015								2.87	-1.55						2.96		heat shock 70kDa protein 2	NM_174344	nucleotide binding;ATP binding;ATP binding;nucleotide binding;ATP binding;ATP binding;	response to stress;response to stress;
IL8RB	OLIGO_12637							2.36	2.73									interleukin 8 receptor, beta	NM_174360
NCAM1	OLIGO_12043							-1.73						1.53				neural cell adhesion molecule 1	NM_174399		cell adhesion;cell adhesion;cell adhesion;cell adhesion;	plasma membrane;plasma membrane;membrane;membrane;integral to membrane;membrane;membrane;
RAB3A	OLIGO_12064				1.69													RAB3A, member RAS oncogene family	NM_174446	nucleotide binding;GTPase activity;GTPase activity;protein binding;GTP binding;GTP binding;GTP binding;GTP binding;protein bindi... <Preview truncated at 128 characters>	respiratory system process;respiratory system process;transport;exocytosis;mitochondrion organization;mitochondrion organization... <Preview truncated at 128 characters>	plasma membrane;plasma membrane;synaptic vesicle;synaptic vesicle;membrane;membrane;synaptic vesicle;synaptic vesicle;
SOCS3	OLIGO_12073						1.93	1.93	2.57		1.97							suppressor of cytokine signaling 3	NM_174466	protein binding;protein binding;	regulation of protein amino acid phosphorylation;negative regulation of signal transduction;regulation of growth;positive regula... <Preview truncated at 128 characters>
CACNB3	OLIGO_12086				-1.67	-1.72												calcium channel, voltage-dependent, beta 3 subunit	NM_174509	ion channel activity;voltage-gated ion channel activity;voltage-gated calcium channel activity;voltage-gated calcium channel act... <Preview truncated at 128 characters>	transport;ion transport;calcium ion transport;calcium ion transport;calcium ion transport;calcium ion transport;T cell receptor ... <Preview truncated at 128 characters>	voltage-gated calcium channel complex;voltage-gated calcium channel complex;membrane;
CHRNA5	OLIGO_12088				1.64														NM_174514	receptor activity;nicotinic acetylcholine-activated cation-selective channel activity;ion channel activity;ion channel activity;... <Preview truncated at 128 characters>	transport;transport;ion transport;ion transport;ion transport;ion transport;ion transport;behavioral response to nicotine;	plasma membrane;plasma membrane;nicotinic acetylcholine-gated receptor-channel complex;membrane;membrane;membrane;integral to me... <Preview truncated at 128 characters>
SLC1A1	OLIGO_12120							-1.63	-3.06									solute carrier family 1 (neuronal/epithelial high affinity glutamate transporter, system Xag), member 1	NM_174599	symporter activity;glutamate:sodium symporter activity;sodium:dicarboxylate symporter activity;glutamate:sodium symporter activi... <Preview truncated at 128 characters>	transport;dicarboxylic acid transport;L-glutamate import;D-aspartate import;dicarboxylic acid transport;L-glutamate import;D-asp... <Preview truncated at 128 characters>	membrane;membrane;membrane;integral to membrane;membrane;membrane;
SLC5A1	OLIGO_12123		-1.75	1.83	-2.19			1.93	-2.16		2.97			2.12	1.58			solute carrier family 5 (sodium/glucose cotransporter), member 1	NM_174606	glucose:sodium symporter activity;protein binding;glucose:sodium symporter activity;	glucose transport;glucose transport;intestinal absorption;response to osmotic stress;glucose transport;	apical plasma membrane;integral to plasma membrane;
SLC34A2	OLIGO_12148						-1.65	-2.28	-2.21									solute carrier family 34 (sodium phosphate), member 2	NM_174661	sodium:phosphate symporter activity;symporter activity;sodium-dependent phosphate transmembrane transporter activity;sodium-depe... <Preview truncated at 128 characters>	in utero embryonic development;transport;ion transport;sodium ion transport;phosphate transport;phosphate transport;phosphate tr... <Preview truncated at 128 characters>	brush border;membrane;membrane;membrane;integral to membrane;integral to membrane;apical plasma membrane;apical plasma membrane;
TNFRSF1A	OLIGO_12151							2.06	2.23				1.62	1.51	1.57	1.92		tumor necrosis factor receptor superfamily, member 1A	NM_174674	receptor activity;receptor activity;tumor necrosis factor receptor activity;tumor necrosis factor receptor activity;tumor necros... <Preview truncated at 128 characters>	prostaglandin metabolic process;apoptosis;defense response;inflammatory response;inflammatory response;signal transduction;cell ... <Preview truncated at 128 characters>	membrane;membrane;integral to membrane;membrane raft;membrane raft;
DGAT1	OLIGO_12158				-2				-1.7	1.57	1.71			1.5		-1.54		diacylglycerol O-acyltransferase homolog 1 (mouse)	NM_174693	diacylglycerol O-acyltransferase activity;acyltransferase activity;transferase activity;2-acylglycerol O-acyltransferase activit... <Preview truncated at 128 characters>	triglyceride biosynthetic process;very-low-density lipoprotein particle assembly;triglyceride biosynthetic process;very-low-dens... <Preview truncated at 128 characters>	endoplasmic reticulum;endoplasmic reticulum membrane;membrane;integral to membrane;membrane fraction;membrane fraction;membrane ... <Preview truncated at 128 characters>
ITGB6	OLIGO_12161						1.54	2.45	2.6				1.56		1.98	2.33		integrin, beta 6	NM_174698	receptor activity;receptor activity;receptor activity;receptor activity;receptor activity;receptor activity;receptor activity;re... <Preview truncated at 128 characters>	inflammatory response;cell adhesion;cell adhesion;cell adhesion;cell adhesion;cell adhesion;cell adhesion;cell adhesion;cell adh... <Preview truncated at 128 characters>	integrin complex;integrin complex;integrin complex;integrin complex;integrin complex;integrin complex;integrin complex;membrane;... <Preview truncated at 128 characters>
FSCN2	OLIGO_12218				-2.17				-1.68									fascin homolog 2, actin-bundling protein, retinal (Strongylocentrotus purpuratus)	NM_176633	actin binding;protein binding, bridging;actin filament binding;	eye photoreceptor cell development;anatomical structure morphogenesis;actin filament bundle assembly;visual perception;	actin cytoskeleton;
MYBL1	OLIGO_12219				-1.53				-2.22									v-myb myeloblastosis viral oncogene homolog (avian)-like 1	NM_176635		dorsal/ventral neural tube patterning;somatic motor neuron differentiation;telencephalon development;
CASP4	OLIGO_12221							1.59	1.52									caspase 4, apoptosis-related cysteine peptidase	NM_176638	cysteine-type endopeptidase activity;cysteine-type endopeptidase activity;cysteine-type endopeptidase activity;cysteine-type end... <Preview truncated at 128 characters>	proteolysis;proteolysis;proteolysis;proteolysis;proteolysis;apoptosis;apoptosis;regulation of apoptosis;negative regulation of a... <Preview truncated at 128 characters>	intracellular;
EIF2AK2	OLIGO_12244							1.63											NM_178109	nucleotide binding;RNA binding;double-stranded RNA binding;translation initiation factor activity;protein kinase activity;protei... <Preview truncated at 128 characters>	translation;protein amino acid phosphorylation;protein amino acid phosphorylation;protein amino acid phosphorylation;protein ami... <Preview truncated at 128 characters>	intracellular;intracellular;
CSN2	OLIGO_12257		1.52		1.75														NM_181008	enzyme inhibitor activity;transporter activity;metalloendopeptidase inhibitor activity;antioxidant activity;	transport;regulation of blood pressure;	extracellular region;extracellular region;extracellular region;
Clca3	OLIGO_12261								1.81							2.01		chloride channel, calcium activated, family member 3	NM_181018
Bt.22978	OLIGO_12274				2.19			2.47	2.82					1.55	1.96	2.12			NM_181867		response to biotic stimulus;	integral to membrane;integral to membrane;
TFPI2	OLIGO_12276								2.38									tissue factor pathway inhibitor 2	NM_182788	serine-type endopeptidase inhibitor activity;serine-type endopeptidase inhibitor activity;peptidase inhibitor activity;peptidase... <Preview truncated at 128 characters>	blood coagulation;blood coagulation;	extracellular region;extracellular region;extracellular region;
TLR9	OLIGO_12278				1.56	1.5												toll-like receptor 9	NM_183081	receptor activity;transmembrane receptor activity;protein binding;siRNA binding;receptor activity;protein binding;	inflammatory response;signal transduction;response to virus;positive regulation of gene-specific transcription from RNA polymera... <Preview truncated at 128 characters>	lysosome;endosome;endoplasmic reticulum;plasma membrane;membrane;membrane;integral to membrane;intrinsic to membrane;early phago... <Preview truncated at 128 characters>
ITGAL	OLIGO_12283						-2.1											integrin, alpha L (antigen CD11A (p180), lymphocyte function-associated antigen 1; alpha polypeptide	NM_198221	receptor activity;receptor activity;cell adhesion molecule binding;	cell adhesion;cell adhesion;integrin-mediated signaling pathway;T cell activation via T cell receptor contact with antigen bound... <Preview truncated at 128 characters>	integrin complex;membrane;membrane;integral to membrane;integrin complex;membrane;membrane;integral to membrane;
Sod2	OLIGO_12287					1.55	3.64	8.02	13.29				1.55	2.77	4.22	4.18		superoxide dismutase 2, mitochondrial	NM_201527	superoxide dismutase activity;superoxide dismutase activity;superoxide dismutase activity;superoxide dismutase activity;superoxi... <Preview truncated at 128 characters>	age-dependent response to reactive oxygen species;regulation of transcription from RNA polymerase II promoter;superoxide metabol... <Preview truncated at 128 characters>	mitochondrion;mitochondrial matrix;
HNF4G	OLIGO_12300				-1.67				-1.88									hepatocyte nuclear factor 4, gamma	NM_205811	DNA binding;DNA binding;transcription factor activity;transcription factor activity;transcription factor activity;steroid hormon... <Preview truncated at 128 characters>	transcription;regulation of transcription, DNA-dependent;regulation of transcription, DNA-dependent;regulation of transcription,... <Preview truncated at 128 characters>	nucleus;nucleus;nucleus;nucleus;nucleus;
TREM1	OLIGO_12303								1.58									triggering receptor expressed on myeloid cells 1	NM_206970	receptor activity;		membrane;membrane;integral to membrane;
KRT6A	OLIGO_12392								1.74										TC225111	structural molecule activity;protein binding;protein binding;structural molecule activity;protein binding;protein binding;	epithelial cell differentiation;negative regulation of epithelial cell proliferation;	mitochondrion;intermediate filament;intermediate filament;keratin filament;keratin filament;keratin filament;mitochondrion;inter... <Preview truncated at 128 characters>
TNFAIP2	OLIGO_12411						1.72	2.16			1.54		1.74	1.97				tumor necrosis factor, alpha-induced protein 2	TC225637
ELAC1	OLIGO_13223		-1.6		2.63	1.82	1.78	1.54	1.81									elaC homolog 1 (E. coli)	U83008	nuclease activity;endonuclease activity;hydrolase activity;hydrolase activity;endoribonuclease activity, producing 5-phosphomon... <Preview truncated at 128 characters>	tRNA processing;tRNA 3-trailer cleavage;	nucleus;nucleus;
IL1A	OLIGO_13249					1.58	2.09	3.23	12.04		1.68		2.33	1.88	1.92	1.51		interleukin 1, alpha	X12497	cytokine activity;cytokine activity;interleukin-1 receptor binding;interleukin-1 receptor binding;interleukin-1 receptor binding... <Preview truncated at 128 characters>	fever;inflammatory response;inflammatory response;inflammatory response;inflammatory response;immune response;immune response;im... <Preview truncated at 128 characters>	extracellular region;extracellular region;extracellular region;extracellular region;extracellular space;extracellular space;extr... <Preview truncated at 128 characters>
UCP1	OLIGO_13250				-2.24	-1.79												uncoupling protein 1 (mitochondrial, proton carrier)	X14064	binding;binding;binding;binding;binding;	transport;transport;mitochondrial transport;transmembrane transport;transport;transport;mitochondrial transport;transmembrane tr... <Preview truncated at 128 characters>	mitochondrion;mitochondrion;mitochondrial inner membrane;mitochondrial inner membrane;membrane;membrane;membrane;integral to mem... <Preview truncated at 128 characters>
