# Supplementary material for: Role of SPI-1 Secreted Effectors in Acute Bovine Response to Salmonella enterica Serovar Typhimurium: A Systems Biology Analysis Approach
Source: PLoS One. 2011 Nov 11;6(11):e26869. doi: 10.1371/journal.pone.0026869 (PMC3214023; doi:10.1371/journal.pone.0026869)
Supplement: Table S6 — z -score of pathways that differed significantly between loops inoculated with wild type Salmonella Typhimurium or an isogenic Δ sipA , sopABDE2 mutant over time. Pathways are based on Kyoto Encyclopedia of Genes and Genomes descriptions and pathway numbers. Symbol_Count refers to the total number of gene symbols present in a pathway. Observed_Count refers to the number of genes that were observed to be significantly altered at a minimum of one time point. Probe_Count refers to the number of spots on the array that were significantly altered at a minimum of one time point (time in minutes). (XLSX) [file pone.0026869.s006.xlsx]

## Sheet: Supporting Table S6
S6 Supporting Details for Table 4
			Bayesian Inference |Z-score| >= 1.96 and |Fold|>=1.5 Method								T-test p value<=0.05 and |fold|>=1.5 Method
			Fold Change for WT Condition vs UI (time in minutes)								Fold Change WT Condition vs UI (time in minutes)
Symbol	Oligo Number		15	30	60	120	240	480	720		15	30	60	120	240	480	720	Description	Accession	Molecular Function	Biological Process	Cellular Component
LOC652614	OLIGO_12363				-3.86	-1.86							-4.5			-3.2		similar to HLA class I histocompatibility antigen, A-11 alpha chain precursor (MHC class I antigen A*11)	AB008612	molecular_function;	antigen processing and presentation of peptide antigen via MHC class I;immune response;immune response;immune response;antigen p... <Preview truncated at 128 characters>	membrane;membrane;membrane;membrane;integral to membrane;MHC class I protein complex;MHC class I protein complex;MHC class I pro... <Preview truncated at 128 characters>
F2R	OLIGO_12567				-1.99								-2.8					coagulation factor II (thrombin) receptor	AJ693807	signal transducer activity;receptor activity;G-protein coupled receptor activity;G-protein coupled receptor activity;receptor bi... <Preview truncated at 128 characters>	connective tissue replacement during inflammatory response;activation of caspase activity;inflammatory response;signal transduct... <Preview truncated at 128 characters>	plasma membrane;plasma membrane;plasma membrane;caveola;membrane;integral to membrane;integral to membrane;integral to membrane;... <Preview truncated at 128 characters>
BTD	OLIGO_12647						-1.68						2					biotinidase	AV607074	hydrolase activity;hydrolase activity, acting on carbon-nitrogen (but not peptide) bonds;hydrolase activity, acting on carbon-ni... <Preview truncated at 128 characters>	nitrogen compound metabolic process;	extracellular region;extracellular space;nucleolus;perikaryon;apical part of cell;
ANAPC11	OLIGO_06880				1.9								2.4					APC11 anaphase promoting complex subunit 11 homolog (yeast)	AW261162	protein binding;zinc ion binding;metal ion binding;	cell cycle;mitosis;cell division;protein K11-linked ubiquitination;	nucleus;nucleus;anaphase-promoting complex;cytoplasm;cytoplasm;
Nup188	OLIGO_06533				-1.75								-2.9						AW266945	protein binding;
PPP1CB	OLIGO_06858				1.92								2.3					protein phosphatase 1, catalytic subunit, beta isoform	AW266973
CTGF	OLIGO_06541								1.58								3.4	connective tissue growth factor	AW267007	integrin binding;insulin-like growth factor binding;heparin binding;heparin binding;	cartilage condensation;ossification;angiogenesis;regulation of cell growth;DNA replication;cell adhesion;cell-matrix adhesion;in... <Preview truncated at 128 characters>	extracellular region;extracellular region;extracellular region;extracellular region;proteinaceous extracellular matrix;proteinac... <Preview truncated at 128 characters>
Taf2	OLIGO_00103				-1.63				-1.67				-1.9						AW267131	protein binding;promoter binding;	G2/M transition of mitotic cell cycle;transcription initiation from RNA polymerase II promoter;positive regulation of gene-speci... <Preview truncated at 128 characters>	transcription factor TFIID complex;transcription factor TFTC complex;
Dnmt3a	OLIGO_05178				-2.51								-2.9					RIKEN cDNA 4833432E10 gene	AW289242	DNA binding;DNA binding;DNA binding;DNA (cytosine-5-)-methyltransferase activity;methyltransferase activity;zinc ion binding;tra... <Preview truncated at 128 characters>	DNA methylation;DNA methylation;DNA methylation;negative regulation of transcription from RNA polymerase II promoter;DNA methyla... <Preview truncated at 128 characters>	euchromatin;nucleus;cytoplasm;nuclear matrix;chromosome, centromeric region;euchromatin;euchromatin;nucleus;nucleus;nucleus;nucl... <Preview truncated at 128 characters>
TNFAIP6	OLIGO_06437								2.51							4.6	6.6	tumor necrosis factor, alpha-induced protein 6	AW461501
Trappc4	OLIGO_03625				2.57		-1.82						3.1					trafficking protein particle complex 4	AW461503
TPM4	OLIGO_10636							2	2.33								2.6	tropomyosin 4	AW461504			podosome;cytoplasm;cortical cytoskeleton;filamentous actin;
Peg3	OLIGO_03626				1.78								2.6					paternally expressed 3	AW461515	nucleic acid binding;transcription factor activity;zinc ion binding;zinc ion binding;metal ion binding;	regulation of transcription, DNA-dependent;apoptosis;	intracellular;intracellular;nucleus;nucleus;nucleus;cytoplasm;cytoplasm;
CEBPB	OLIGO_11543							2.43	2.35							2.2	2.4	CCAAT/enhancer binding protein (C/EBP), beta	AW461572	DNA binding;transcription factor activity;transcription factor activity;RNA polymerase II transcription factor activity, enhance... <Preview truncated at 128 characters>	transcription;regulation of transcription, DNA-dependent;regulation of transcription, DNA-dependent;cell differentiation;regulat... <Preview truncated at 128 characters>	nucleus;nucleus;nucleus;
Tnks1bp1	OLIGO_03646				-1.66				1.5								2.7	tankyrase 1 binding protein 1	AW461846
Bt.35853	OLIGO_08359								2.01								3.2		AW461864
Phlda1	OLIGO_06856				1.88	2.12	2.25	3.24	4.9						5.1			pleckstrin homology-like domain, family A, member 1	AW461932	protein binding;	FasL biosynthetic process;
ACP2	OLIGO_08386				-1.87								-2.5					acid phosphatase 2, lysosomal	AW462034	acid phosphatase activity;acid phosphatase activity;acid phosphatase activity;hydrolase activity;	skeletal system development;lysosome organization;	lysosome;lysosomal membrane;membrane;integral to membrane;lysosomal lumen;
Lad1	OLIGO_11363				-2.19								-2.8					ladinin	AW462126		germ cell programmed cell death;
FKSG24	OLIGO_07010				-2.58								-2.5			-1.8			AW462162
NAB1	OLIGO_03693				2.32								3					NGFI-A binding protein 1 (EGR1 binding protein 1)	AW462250	transcription repressor activity;transcription repressor activity;transcription repressor activity;	endochondral ossification;Schwann cell differentiation;negative regulation of transcription;negative regulation of transcription... <Preview truncated at 128 characters>	nucleus;nucleus;nucleus;Golgi apparatus;plasma membrane;
Eps8l1	OLIGO_07551				1.75		-1.93						2.2					EPS8-like 1	AW462315
FZD5	OLIGO_07306				-1.97								-3.2					frizzled homolog 5 (Drosophila)	AW462410
FAM53C	OLIGO_08412				1.71								2.3						AW462414
RP5-1022P6.2	OLIGO_07714				1.53				1.98								2.9	hypothetical protein KIAA1434	AW462554
LOC512355	OLIGO_08504				2.65								3.3						AW462640	signal transducer activity;protein binding;protein binding;protein binding;electron carrier activity;	positive regulation of T cell cytokine production;protein complex assembly;activation of NF-kappaB-inducing kinase activity;sign... <Preview truncated at 128 characters>	mitochondrion;nucleus;
IDH1	OLIGO_08296						-1.75		-1.64							-2.4	-2.8	isocitrate dehydrogenase 1 (NADP+), soluble	AW462719	magnesium ion binding;magnesium ion binding;magnesium ion binding;isocitrate dehydrogenase (NADP+) activity;isocitrate dehydroge... <Preview truncated at 128 characters>	glyoxylate cycle;tricarboxylic acid cycle;isocitrate metabolic process;isocitrate metabolic process;2-oxoglutarate metabolic pro... <Preview truncated at 128 characters>	cytoplasm;cytoplasm;cytoplasm;cytoplasm;cytosol;cytoplasm;
Galnt3	OLIGO_09609							2.01	2.35							2.7	2.7	UDP-N-acetyl-alpha-D-galactosamine:polypeptide N-acetylgalactosaminyltransferase 3 (GalNAc-T3) (EC:2.4.1.41)	AW463251	polypeptide N-acetylgalactosaminyltransferase activity;microtubule motor activity;	carbohydrate metabolic process;mitosis;mitotic spindle organization;mitotic centrosome separation;	membrane fraction;integral to membrane;
SAFB	OLIGO_09316				-1.71								-1.9					scaffold attachment factor B	AW463379	nucleotide binding;nucleic acid binding;nucleic acid binding;nucleic acid binding;
TINAGL1	OLIGO_11415				-2.35	-1.52							-3.3					tubulointerstitial nephritis antigen-like 1	AW463460	extracellular matrix structural constituent;	mitosis;	spindle;nucleus;
Snx10	OLIGO_08500							1.9	1.91				1.8			1.9	2.8	sorting nexin 10	AW463500	protein binding;phosphoinositide binding;	transport;cell communication;protein transport;
FOSL2	OLIGO_10810							1.79	1.93							2.1	2.3	FOS-like antigen 2	AW463531		regulation of transcription;entrainment of circadian clock;circadian rhythm;	cytoplasm;nuclear matrix;
SLC7A7	OLIGO_03779				-1.69				-3.02							-1.8	-2.4	solute carrier family 7 (cationic amino acid transporter, y+ system), member 7	AW463705	amino acid transmembrane transporter activity;amino acid transmembrane transporter activity;	transport;amino acid transport;transmembrane transport;transmembrane transport;transport;amino acid transport;transmembrane tran... <Preview truncated at 128 characters>	membrane;membrane;integral to membrane;membrane;membrane;integral to membrane;
EPS15L1	OLIGO_03789				2.1								3						AW463807	calcium ion binding;calcium ion binding;protein binding;
GIT1	OLIGO_05918		1.54		2.03								2.5					G protein-coupled receptor kinase interactor 1	AW463852	ARF GTPase activator activity;zinc ion binding;	regulation of ARF GTPase activity;	cellular_component;
CD74	OLIGO_11390				-2.39	-1.79							-2.7			-2.1		CD74 molecule, major histocompatibility complex, class II invariant chain	AW463930	cytokine receptor activity;cytokine binding;MHC class II protein binding;MHC class II protein binding;	prostaglandin biosynthetic process;positive regulation of cytokine-mediated signaling pathway;positive regulation of cytokine-me... <Preview truncated at 128 characters>	lysosome;multivesicular body;endoplasmic reticulum;Golgi apparatus;plasma membrane;external side of plasma membrane;membrane;mem... <Preview truncated at 128 characters>
OSTF1	OLIGO_05953							1.53	1.86								2	osteoclast stimulating factor 1	AW463947	identical protein binding;		cytoplasm;cytoplasm;
CFLAR	OLIGO_03799							1.69	1.58								2	CASP8 and FADD-like apoptosis regulator	AW464057
LOC508133	OLIGO_08568						2.09	2.24	2.33						2.6		3.2		AW464191	protein binding;protein binding;	regulation of muscle contraction;cell adhesion;cell-cell signaling;regulation of gene expression;activation of store-operated ca... <Preview truncated at 128 characters>	Golgi apparatus;plasma membrane;focal adhesion;costamere;membrane raft;membrane fraction;plasma membrane;
PLAT	OLIGO_08576				1.99	1.64		1.79	2.03				3.5	2.5		2.3	2.6	plasminogen activator, tissue	AW464360	catalytic activity;serine-type endopeptidase activity;serine-type endopeptidase activity;serine-type endopeptidase activity;seri... <Preview truncated at 128 characters>	response to hypoxia;proteolysis;proteolysis;proteolysis;proteolysis;smooth muscle cell migration;platelet-derived growth factor ... <Preview truncated at 128 characters>	extracellular region;extracellular region;extracellular space;extracellular space;cytoplasm;secretory granule;apical part of cel... <Preview truncated at 128 characters>
PFDN6	OLIGO_06026								1.53								2.3		AW464404	unfolded protein binding;chaperone binding;	protein folding;chaperone-mediated protein complex assembly;	prefoldin complex;prefoldin complex;
Mybpc2	OLIGO_11523			1.52	-2.53	-1.65							-5.1					myosin binding protein C, fast-type	AW464619
Egln3	OLIGO_05898				1.57								2.6					EGL nine homolog 3 (C. elegans)	AW465035	iron ion binding;protein binding;oxidoreductase activity;oxidoreductase activity, acting on paired donors, with incorporation or... <Preview truncated at 128 characters>	oxidation reduction;
S100a14	OLIGO_08510				1.55			1.63	1.64								2.2	S100 calcium binding protein A14	AW465094	calcium ion binding;		cytoplasm;cytoplasm;
Srgn	OLIGO_03857						1.55	5.31	6.8							3.5	5.6		AW465275	protein binding;	apoptosis;negative regulation of bone mineralization;mast cell secretory granule organization;T cell secretory granule organizat... <Preview truncated at 128 characters>	extracellular space;Golgi apparatus;mast cell granule;
Slc17a7	OLIGO_06090		1.78		2.05	1.54											2		AW465294	symporter activity;sodium:inorganic phosphate symporter activity;	transport;ion transport;sodium ion transport;neurotransmitter transport;sequestering of neurotransmitter;transmembrane transport... <Preview truncated at 128 characters>	membrane;membrane;integral to membrane;integral to membrane;synaptosome;synaptosome;cell junction;synaptic vesicle membrane;cyto... <Preview truncated at 128 characters>
Tegt	OLIGO_11665				-1.64				-1.62								-2.4	testis enhanced gene transcript	AW465347
Pnpt1	OLIGO_06104							1.63									2.7	polyribonucleotide nucleotidyltransferase 1	AW465370		response to glucocorticoid stimulus;	extracellular space;
CDK4	OLIGO_06115				1.85								2					cyclin-dependent kinase 4	AW465448	nucleotide binding;protein kinase activity;protein kinase activity;protein kinase activity;protein serine/threonine kinase activ... <Preview truncated at 128 characters>	G1/S transition of mitotic cell cycle;protein amino acid phosphorylation;protein amino acid phosphorylation;protein amino acid p... <Preview truncated at 128 characters>	cyclin-dependent protein kinase holoenzyme complex;cyclin-dependent protein kinase holoenzyme complex;nucleus;nucleus;transcript... <Preview truncated at 128 characters>
Gng5	OLIGO_07046						1.83	1.84	2.07								2.1	guanine nucleotide binding protein (G protein), gamma 5	AW465466	signal transducer activity;signal transducer activity;signal transducer activity;	signal transduction;G-protein coupled receptor protein signaling pathway;G-protein coupled receptor protein signaling pathway;	mitochondrion;heterotrimeric G-protein complex;heterotrimeric G-protein complex;plasma membrane;plasma membrane;membrane;
STC1	OLIGO_10386							1.67	1.89								4.4	stanniocalcin 1	AW465510	hormone activity;hormone activity;		extracellular region;extracellular region;extracellular region;extracellular space;
CDK2	OLIGO_06116				1.57								2.2					cyclin-dependent kinase 2	AW465591	nucleotide binding;protein kinase activity;protein kinase activity;protein kinase activity;protein serine/threonine kinase activ... <Preview truncated at 128 characters>	protein amino acid phosphorylation;protein amino acid phosphorylation;protein amino acid phosphorylation;protein amino acid phos... <Preview truncated at 128 characters>	cyclin-dependent protein kinase holoenzyme complex;cyclin-dependent protein kinase holoenzyme complex;cyclin-dependent protein k... <Preview truncated at 128 characters>
JUND	OLIGO_10548						2.07	1.55							2.5			jun D proto-oncogene	AW465610	DNA binding;DNA binding;transcription factor activity;transcription factor activity;transcription factor activity;sequence-speci... <Preview truncated at 128 characters>	osteoblast development;transcription;regulation of transcription, DNA-dependent;regulation of transcription, DNA-dependent;regul... <Preview truncated at 128 characters>	nucleus;nucleus;nucleus;
DUSP1	OLIGO_10175						1.61	2.45	5.29							3.7	6.8	dual specificity phosphatase 1	AW465681	protein tyrosine phosphatase activity;protein tyrosine phosphatase activity;protein binding;protein tyrosine/serine/threonine ph... <Preview truncated at 128 characters>	protein amino acid dephosphorylation;protein amino acid dephosphorylation;protein amino acid dephosphorylation;protein amino aci... <Preview truncated at 128 characters>
Bt.65311	OLIGO_06162							1.71	1.94							2.2	2.3		AW465865		regulation of transcription;entrainment of circadian clock;circadian rhythm;	cytoplasm;nuclear matrix;
Phlda2	OLIGO_11299							1.88	2.28								2.6	pleckstrin homology-like domain, family A, member 2	AW466053		organ morphogenesis;	cytoplasm;cytoplasm;membrane;membrane;
LOC535487	OLIGO_03910				-2.32	-2.01							-2.3	-1.9		-1.9			AW466177
MGAT5B	OLIGO_12889				-2.22								-2.8					mannosyl (alpha-1,6-)-glycoprotein beta-1,6-N-acetyl-glucosaminyltransferase, isozyme B	AW484574
Cyb5r1	OLIGO_12507				-1.76								-3.1					cytochrome b5 reductase 1	BE756419	cytochrome-b5 reductase activity;oxidoreductase activity;oxidoreductase activity;oxidoreductase activity;oxidoreductase activity... <Preview truncated at 128 characters>	steroid biosynthetic process;lipid biosynthetic process;sterol biosynthetic process;oxidation reduction;oxidation reduction;oxid... <Preview truncated at 128 characters>	mitochondrion;membrane;membrane;integral to membrane;
Slc39a13	OLIGO_12628				-2.58	-1.52							-3.2					solute carrier family 39 (metal ion transporter), member 13	BE810055	metal ion transmembrane transporter activity;	transport;ion transport;zinc ion transport;metal ion transport;transmembrane transport;	membrane;membrane;membrane;integral to membrane;
Mrpl48	OLIGO_04691				1.69								2.8						BF039118	structural constituent of ribosome;	translation;	intracellular;mitochondrion;mitochondrion;mitochondrion;ribosome;ribosome;ribonucleoprotein complex;
Plp2	OLIGO_09290						1.82		1.95								2.6	proteolipid protein 2	BF039237	protein binding;chemokine binding;		plasma membrane;membrane;membrane;membrane;integral to membrane;
TFDP2	OLIGO_05060								-1.57							-2.6	-2.5	transcription factor Dp-2 (E2F dimerization partner 2)	BF039311	DNA binding;transcription factor activity;transcription factor activity;protein domain specific binding;DNA binding;transcriptio... <Preview truncated at 128 characters>	transcription;regulation of transcription, DNA-dependent;regulation of transcription, DNA-dependent;regulation of transcription;... <Preview truncated at 128 characters>	nucleus;nucleus;transcription factor complex;nucleus;nucleus;transcription factor complex;
Bt.24982	OLIGO_04203				1.67								2.1						BF039339
Fbxo25	OLIGO_04626								-2.52								-1.9	F-box protein 25	BF039392			nucleus;nucleus;
Bt.13202	OLIGO_09250				1.82								3.6						BF039398
LOC615358	OLIGO_08927			1.78	-3.35				-2.25				-4			-1.8	-2.9		BF039401
MGC127521	OLIGO_08652		1.56								1.9		2.8						BF039417	SH3 domain binding;	transport;protein transport;	nucleus;nucleus;cytoplasm;endosome;endosome;microtubule organizing center;cytoskeleton;cytoskeleton;membrane;late endosome membr... <Preview truncated at 128 characters>
Zkscan1	OLIGO_05057				1.5								2.1						BF039448
PLAU	OLIGO_08540					1.51	1.91	2.64	5.61						3.2	5.6	7.8	plasminogen activator, urokinase	BF039457	catalytic activity;serine-type endopeptidase activity;serine-type endopeptidase activity;serine-type endopeptidase activity;seri... <Preview truncated at 128 characters>	response to hypoxia;proteolysis;proteolysis;proteolysis;smooth muscle cell migration;regulation of cell proliferation;	extracellular region;extracellular region;
TXNDC9	OLIGO_09462				2.03								2.9					thioredoxin domain containing 9	BF039655	protein binding;	cell redox homeostasis;cell redox homeostasis;
XBP1	OLIGO_07752						1.78								2.1			X-box binding protein 1	BF039767
NDUFAB1	OLIGO_06511				1.52								2.4					NADH dehydrogenase (ubiquinone) 1, alpha/beta subcomplex, 1, 8kDa	BF039771	acyl carrier activity;acyl carrier activity;fatty acid binding;NADH dehydrogenase (ubiquinone) activity;oxidoreductase activity;... <Preview truncated at 128 characters>	mitochondrial electron transport, NADH to ubiquinone;fatty acid biosynthetic process;fatty acid biosynthetic process;fatty acid ... <Preview truncated at 128 characters>	mitochondrion;mitochondrion;mitochondrion;mitochondrial respiratory chain complex I;mitochondrial matrix;mitochondrial membrane;... <Preview truncated at 128 characters>
IER3	OLIGO_10856				1.64	1.53	1.6	2.86	4.59				2.5			3.6	6	immediate early response 3	BF039878	protein binding;
FOS	OLIGO_09217			1.72		1.69	3.09	3.07	4.3					2.5	4.6	4.8	3.5	v-fos FBJ murine osteosarcoma viral oncogene homolog	BF039907	DNA binding;DNA binding;DNA binding;double-stranded DNA binding;transcription factor activity;transcription factor activity;tran... <Preview truncated at 128 characters>	regulation of transcription, DNA-dependent;regulation of transcription, DNA-dependent;regulation of transcription, DNA-dependent... <Preview truncated at 128 characters>	nucleus;nucleus;nucleus;nucleus;nucleus;transcription factor complex;transcription factor complex;nucleus;nucleus;transcription ... <Preview truncated at 128 characters>
LOC508722	OLIGO_04067				-1.72				-1.7				-2.1						BF040025	nucleotide binding;nucleic acid binding;RNA binding;protein binding;transcription coactivator activity;protein binding;transcrip... <Preview truncated at 128 characters>	mRNA processing;positive regulation of protein catabolic process;NLS-bearing substrate import into nucleus;transcription from RN... <Preview truncated at 128 characters>	nucleus;nucleus;cytoskeleton;nucleus;nucleus;nucleus;ubiquitin ligase complex;membrane fraction;ubiquitin ligase complex;membran... <Preview truncated at 128 characters>
SMAD6	OLIGO_08484				1.59						1.9		2.6					SMAD family member 6	BF040034	protein binding;sequence-specific DNA binding;transcription activator activity;protein binding;	immune response;zygotic specification of dorsal/ventral axis;negative regulation of BMP signaling pathway;positive regulation of... <Preview truncated at 128 characters>	cytoplasm;cytoplasm;
TRIM25	OLIGO_04429							1.68	1.89								2.5	tripartite motif-containing 25	BF040073	protein binding;zinc ion binding;metal ion binding;		nucleus;cytoplasm;cytoplasm;focal adhesion;cell junction;
Plac8	OLIGO_09129					-2.06		1.69	2.52							2	2.5	placenta-specific 8	BF040284
Scrn1	OLIGO_04871		1.52		2.33	1.52							3.6					secernin 1	BF040336	molecular_function;dipeptidase activity;	proteolysis;exocytosis;exocytosis;	cellular_component;nucleus;cytoplasm;cytoplasm;nuclear membrane;
CASP7	OLIGO_04367		-1.92								-2.4							caspase 7, apoptosis-related cysteine peptidase	BF040440
Hsp90ab1	OLIGO_11283			1.7	-1.96								-2.8						BF040464	nucleotide binding;ATP binding;ATP binding;ATP binding;ATP binding;unfolded protein binding;unfolded protein binding;ATP binding... <Preview truncated at 128 characters>	placenta development;protein folding;protein folding;response to stress;response to stress;response to stress;negative regulatio... <Preview truncated at 128 characters>	intracellular;cytoplasm;cytoplasm;cytoplasm;mitochondrion;mitochondrion;melanosome;intracellular;cytoplasm;mitochondrion;
CPSF1	OLIGO_04296				1.91								2.7					cleavage and polyadenylation specific factor 1, 160kDa	BF040614	nucleic acid binding;RNA binding;mRNA 3-UTR binding;protein binding;nucleic acid binding;mRNA 3-UTR binding;protein binding;mR... <Preview truncated at 128 characters>	mRNA polyadenylation;mRNA cleavage;mRNA processing;mRNA polyadenylation;mRNA cleavage;mRNA polyadenylation;mRNA cleavage;	nucleus;nucleus;nucleoplasm;mRNA cleavage and polyadenylation specificity factor complex;nucleus;mRNA cleavage and polyadenylati... <Preview truncated at 128 characters>
Mkrn2	OLIGO_10565				1.83								3.1					makorin, ring finger protein, 2	BF040653	nucleic acid binding;zinc ion binding;metal ion binding;nucleic acid binding;protein binding;zinc ion binding;zinc ion binding;m... <Preview truncated at 128 characters>		intracellular;intracellular;
Tacstd1	OLIGO_11364			1.79				2.66	2.33							2	2.6	tumor-associated calcium signal transducer 1	BF040754
MGC127307	OLIGO_04743						2.03	2.14	3.44						2.4	2	4		BF040971
MXD4	OLIGO_04738				-2.63	-1.92			-2				-2.9					MAX dimerization protein 4	BF040980	DNA binding;protein binding;transcription regulator activity;transcription regulator activity;	negative regulation of transcription;regulation of transcription;regulation of transcription;	nucleus;
Bt.3422	OLIGO_11552				-1.93				-1.55				-1.9						BF041211
DUSP6	OLIGO_08978							2.5								3		dual specificity phosphatase 6	BF041230	phosphoprotein phosphatase activity;phosphoprotein phosphatase activity;protein serine/threonine phosphatase activity;protein ty... <Preview truncated at 128 characters>	inactivation of MAPK activity;protein amino acid dephosphorylation;protein amino acid dephosphorylation;protein amino acid depho... <Preview truncated at 128 characters>	cytoplasm;cytoplasm;cytoplasm;cytoplasm;cytoplasm;
Spag1	OLIGO_04603								1.78				2.7			2	3	sperm associated antigen 1	BF041310
F3	OLIGO_04599						2.03	3.17	6.04				2.2		2.6	5.1	11.9	coagulation factor III (thromboplastin, tissue factor)	BF041314	molecular_function;	blood coagulation;blood coagulation;blood coagulation;	membrane;membrane;integral to membrane;integral to membrane;integral to membrane;
Dscr1	OLIGO_05033				1.76	1.57			1.77				2.5	2.5			2.6	regulator of calcineurin 1	BF041330	protein binding;	calcium-mediated signaling;regulation of phosphoprotein phosphatase activity;skeletal muscle fiber development;	nucleus;cytoplasm;
FLJ12716	OLIGO_05021				1.62								2.2						BF041346
Bt.15900	OLIGO_04542								-1.94							-1.8	-2.3		BF041460	catalytic activity;adenosylhomocysteinase activity;adenosylhomocysteinase activity;adenosylhomocysteinase activity;binding;hydro... <Preview truncated at 128 characters>	one-carbon metabolic process;one-carbon metabolic process;one-carbon metabolic process;metabolic process;
DDX23	OLIGO_04113				-2.33	-1.7							-3					DEAD (Asp-Glu-Ala-Asp) box polypeptide 23	BF041597	nucleotide binding;nucleic acid binding;nucleic acid binding;nucleic acid binding;helicase activity;helicase activity;protein bi... <Preview truncated at 128 characters>		U5 snRNP;
OTUD5	OLIGO_04549							1.5	2.77								5	OTU domain containing 5	BF041642
Slc39a7	OLIGO_09442				2.24								2.9					solute carrier family 39 (zinc transporter), member 7	BF041712	metal ion transmembrane transporter activity;	metal ion transport;transmembrane transport;	<31x31 double>
Crip1	OLIGO_06439		-1.5				-1.75	-1.57	-3.24								-3.8	cysteine-rich protein 1 (intestinal)	BF041729	zinc ion binding;metal ion binding;
ABHD13	OLIGO_04554								1.56								2.4		BF041780
Naprt1	OLIGO_08505				-1.74								-2.5					nicotinate phosphoribosyltransferase domain containing 1	BF041781	nicotinate phosphoribosyltransferase activity;nicotinate phosphoribosyltransferase activity;transferase activity;transferase act... <Preview truncated at 128 characters>	pyridine nucleotide biosynthetic process;pyridine nucleotide biosynthetic process;pyridine nucleotide biosynthetic process;	cytoplasm;cytosol;
Cebpd	OLIGO_11528						2.76	3.25	3.23						3.4	3.1	2.5		BF041807	DNA binding;transcription factor activity;transcription factor activity;sequence-specific DNA binding;sequence-specific DNA bind... <Preview truncated at 128 characters>	transcription;regulation of transcription, DNA-dependent;regulation of transcription, DNA-dependent;regulation of transcription;	nucleus;nucleus;nucleus;
MTHFD1L	OLIGO_04973				1.74								3.6				1.8	methylenetetrahydrofolate dehydrogenase (NADP+ dependent) 1-like (EC:6.3.4.3)	BF041860	nucleotide binding;catalytic activity;catalytic activity;catalytic activity;catalytic activity;formate-tetrahydrofolate ligase a... <Preview truncated at 128 characters>	one-carbon metabolic process;metabolic process;folic acid and derivative biosynthetic process;folic acid and derivative biosynth... <Preview truncated at 128 characters>	mitochondrion;mitochondrion;mitochondrion;
LOC507402	OLIGO_04083					1.63		1.59	1.5					3.5		2.5	2.2		BF041953
Lmbr1	OLIGO_09199						1.5								2.4			limb region 1	BF041985		embryonic digit morphogenesis;muscle organ development;
FLJ12886	OLIGO_04914								1.71								3.2		BF042008
Rhpn2	OLIGO_04423								1.6								2.8	rhophilin, Rho GTPase binding protein 2	BF042073	protein binding;	signal transduction;signal transduction;	intracellular;intracellular;cytoplasm;perinuclear region of cytoplasm;
Rwdd1	OLIGO_06594				1.6								2					RWD domain containing 1	BF042283
Nsun5	OLIGO_09020				-2.12								-2.7						BF042364
LOC506569	OLIGO_04272				1.73								1.9						BF042688	receptor binding;receptor binding;protein binding;identical protein binding;protein binding;	cell migration;establishment or maintenance of cell polarity;cell differentiation;central nervous system development;cell fate s... <Preview truncated at 128 characters>	nucleoplasm;
LOC504650	OLIGO_04276							1.71								1.9			BF042816	transferase activity;phosphotransferase activity, for other substituted phosphate groups;ethanolaminephosphotransferase activity... <Preview truncated at 128 characters>	phospholipid biosynthetic process;lipid metabolic process;positive regulation of cell migration;inflammatory response;positive r... <Preview truncated at 128 characters>	endoplasmic reticulum membrane;membrane;vesicle;
HRSP12	OLIGO_04282						1.63	1.62	2.01								2.1	heat-responsive protein 12	BF042842	nuclease activity;endonuclease activity;hydrolase activity;protein binding;cytoskeletal protein binding;	regulation of translational termination;regulation of translational termination;cytoskeleton organization;signal transduction;	mitochondrion;nucleus;cytoplasm;nucleus;cytoplasm;nucleus;cytoplasm;intermediate filament;
STAT1	OLIGO_09339							2.61	1.8							2.1		signal transducer and activator of transcription 1, 91kDa	BF042916	transcription factor activity;transcription factor activity;transcription factor activity;transcription factor activity;transcri... <Preview truncated at 128 characters>	regulation of transcription, DNA-dependent;regulation of transcription, DNA-dependent;regulation of transcription, DNA-dependent... <Preview truncated at 128 characters>	nucleus;nucleus;nucleus;nucleus;nucleus;nucleus;nucleolus;cytoplasm;cytoplasm;nucleus;nucleus;nucleus;nucleus;nucleus;nucleus;nu... <Preview truncated at 128 characters>
BTG2	OLIGO_04233						1.7	2.34	3.31						2.8	3.3	5.2	BTG family, member 2	BF043020	protein binding;protein binding;protein binding;antigen binding;MHC class II protein binding;transmembrane receptor activity;pro... <Preview truncated at 128 characters>	response to mechanical stimulus;cell surface receptor linked signaling pathway;positive regulation of natural killer cell mediat... <Preview truncated at 128 characters>	external side of plasma membrane;nucleus;
Sat1	OLIGO_07102							1.92	3.2								2.4	spermidine/spermine N1-acetyl transferase 1	BF043097	diamine N-acetyltransferase activity;N-acetyltransferase activity;acyltransferase activity;transferase activity;	metabolic process;	cytoplasm;cytoplasm;
Trmt1	OLIGO_05084			1.93	-2.65								-3.7					tRNA 5-methylaminomethyl-2-thiouridylate methyltransferase	BF043207	nucleic acid binding;RNA binding;tRNA (guanine-N2-)-methyltransferase activity;zinc ion binding;metal ion binding;tRNA (guanine-... <Preview truncated at 128 characters>	tRNA processing;tRNA processing;	cellular_component;
S100A2	OLIGO_08414				2.27		1.54	2	5.16				4.1			4	14.9		BF043546	calcium ion binding;calcium ion binding;
STAT1	OLIGO_06420						1.78	2.21	2.62		-1.6					2.3	2.5	signal transducer and activator of transcription 1, 91kDa	BF043726	transcription factor activity;transcription factor activity;transcription factor activity;transcription factor activity;transcri... <Preview truncated at 128 characters>	regulation of transcription, DNA-dependent;regulation of transcription, DNA-dependent;regulation of transcription, DNA-dependent... <Preview truncated at 128 characters>	nucleus;nucleus;nucleus;nucleus;nucleus;nucleus;nucleolus;cytoplasm;cytoplasm;nucleus;nucleus;nucleus;nucleus;nucleus;nucleus;nu... <Preview truncated at 128 characters>
PSPH	OLIGO_06449				1.71			1.72	2.21							2	3.2	phosphoserine phosphatase	BF043883	catalytic activity;phosphoserine phosphatase activity;phosphoserine phosphatase activity;phosphoserine phosphatase activity;prot... <Preview truncated at 128 characters>	L-serine biosynthetic process;L-serine biosynthetic process;metabolic process;metabolic process;cellular amino acid biosynthetic... <Preview truncated at 128 characters>
Bt.1489	OLIGO_06472				-1.69	-1.82							-1.9						BF043897	triglyceride lipase activity;	lipid metabolic process;
B4galt1	OLIGO_08625						1.51	1.84	1.77						2.1	2.1	2	UDP-Gal:betaGlcNAc beta 1,4- galactosyltransferase, polypeptide 1	BF043934	beta-N-acetylglucosaminylglycopeptide beta-1,4-galactosyltransferase activity;beta-N-acetylglucosaminylglycopeptide beta-1,4-gal... <Preview truncated at 128 characters>	epithelial cell development;acute inflammatory response;carbohydrate metabolic process;lactose biosynthetic process;galactose me... <Preview truncated at 128 characters>	Golgi trans cisterna;Golgi trans cisterna;extracellular region;extracellular region;Golgi apparatus;Golgi apparatus;Golgi appara... <Preview truncated at 128 characters>
CCL2	OLIGO_07917			1.65		1.87	3.7	6.03	17.24						5	12.6	13.9	chemokine (C-C motif) ligand 2	BF043950	G-protein-coupled receptor binding;cytokine activity;protein binding;chemokine activity;chemokine activity;G-protein-coupled rec... <Preview truncated at 128 characters>	monocyte chemotaxis;anti-apoptosis;chemotaxis;immune response;immune response;response to bacterium;macrophage chemotaxis;monocy... <Preview truncated at 128 characters>	extracellular region;extracellular region;extracellular space;extracellular space;extracellular region;extracellular region;extr... <Preview truncated at 128 characters>
Rnf149	OLIGO_09431								1.89				2				2.6		BF044113	SH3/SH2 adaptor activity;identical protein binding;protein binding;zinc ion binding;	biological_process;	cellular_component;
PFDN4	OLIGO_04011						-2.11		-2.25								-2.2	prefoldin subunit 4	BF044280	unfolded protein binding;protein binding;	protein folding;protein folding;regulation of transcription from RNA polymerase II promoter involved in spinal cord association ... <Preview truncated at 128 characters>	prefoldin complex;cytosol;transcription factor complex;
SSBP1	OLIGO_04330				-1.64								-2.1					single-stranded DNA binding protein 1	BF044515	DNA binding;single-stranded DNA binding;single-stranded DNA binding;	DNA replication;DNA replication;positive regulation of helicase activity;mitochondrion morphogenesis;	mitochondrion;mitochondrion;mitochondrion;mitochondrion;mitochondrial nucleoid;
Dnaja2	OLIGO_06279						1.68		1.57						1.9			DnaJ (Hsp40) homolog, subfamily A, member 2	BF044731	ATP binding;heat shock protein binding;heat shock protein binding;heat shock protein binding;heat shock protein binding;metal io... <Preview truncated at 128 characters>	protein folding;protein folding;protein folding;protein folding;protein folding;response to heat;protein folding;protein folding... <Preview truncated at 128 characters>	<31x31 double>
Sin3B	OLIGO_09010			2.19	-3.33								-3.4					transcriptional regulator, SIN3B (yeast)	BF044910
C2orf30	OLIGO_09000				1.64								2						BF044941
Ppp1r16a	OLIGO_11547				-2.65	-1.58	1.83		-2.15				-3.5			-2.4	-2.7	protein phosphatase 1, regulatory (inhibitor) subunit 16A	BF045030	protein binding;protein binding;	anion transport;
Rnf214	OLIGO_04651			-1.6	1.57							-1.8	2.4						BF045073	protein binding;zinc ion binding;protein binding;zinc ion binding;	biological_process;biological_process;	cellular_component;cellular_component;
AGPAT7	OLIGO_09052								1.98								2.4	1-acylglycerol-3-phosphate O-acyltransferase 7 (lysophosphatidic acid acyltransferase, eta)	BF045562	calcium ion binding;acyltransferase activity;acyltransferase activity;transferase activity;	metabolic process;
ANPEP	OLIGO_08334			1.89	-2.82			-2.78	-15.85				-4.2			-3	-3.1	alanyl (membrane) aminopeptidase (aminopeptidase N, aminopeptidase M, microsomal aminopeptidase, CD1	BF045684	aminopeptidase activity;aminopeptidase activity;peptidase activity;metallopeptidase activity;metallopeptidase activity;zinc ion ... <Preview truncated at 128 characters>	angiogenesis;proteolysis;multicellular organismal development;cell differentiation;	ER-Golgi intermediate compartment;membrane;membrane;integral to membrane;
Col4a1	OLIGO_09395								1.54								2.9	collagen, type IV, alpha 1	BF045718	extracellular matrix structural constituent;binding;protein binding;platelet-derived growth factor binding;		extracellular region;proteinaceous extracellular matrix;collagen;collagen type IV;basement membrane;basement membrane;extracellu... <Preview truncated at 128 characters>
TIMP1	OLIGO_08931							2.62	4.34						2.3	5	7.4	TIMP metallopeptidase inhibitor 1	BF045724	enzyme inhibitor activity;protein binding;metalloendopeptidase inhibitor activity;metalloendopeptidase inhibitor activity;metal ... <Preview truncated at 128 characters>	erythrocyte maturation;	extracellular region;extracellular region;proteinaceous extracellular matrix;basement membrane;
CD44	OLIGO_09443				2.19								3					CD44 molecule (Indian blood group)	BF045864	receptor activity;binding;binding;hyaluronic acid binding;binding;binding;hyaluronic acid binding;	cell adhesion;cell adhesion;cell adhesion;cell adhesion;cell adhesion;	membrane;membrane;membrane;integral to membrane;membrane;
Hoxd9	OLIGO_11437				-2.71				-2.04				-2.8					homeo box D10	BF045946
ANKRD1	OLIGO_08536								1.5			-2.2					3.5	ankyrin repeat domain 1 (cardiac muscle)	BF046005	transcription corepressor activity;protein binding;	regulation of transcription from RNA polymerase II promoter;	nucleus;nucleus;nucleus;transcription factor complex;cytoplasm;I band;
Lap3	OLIGO_10215							2.38	2.84							2	2.3	leucine aminopeptidase 3	BF046122	aminopeptidase activity;aminopeptidase activity;aminopeptidase activity;aminopeptidase activity;peptidase activity;peptidase act... <Preview truncated at 128 characters>	proteolysis;proteolysis;protein metabolic process;proteolysis;proteolysis;proteolysis;signal transduction;cell proliferation;epi... <Preview truncated at 128 characters>	intracellular;intracellular;cytoplasm;cytoplasm;cytoplasm;mitochondrion;mitochondrion;cytoplasm;cytoplasm;cytoplasm;integral to ... <Preview truncated at 128 characters>
MTHFD2	OLIGO_06376						1.5	1.93	1.66						2.6	2.7	1.8	methylenetetrahydrofolate dehydrogenase (NADP+ dependent) 2, methenyltetrahydrofolate cyclohydrolase	BF046156	magnesium ion binding;catalytic activity;catalytic activity;catalytic activity;catalytic activity;catalytic activity;catalytic a... <Preview truncated at 128 characters>	one-carbon metabolic process;metabolic process;folic acid and derivative biosynthetic process;folic acid and derivative biosynth... <Preview truncated at 128 characters>	mitochondrion;mitochondrion;mitochondrion;
ROCK2	OLIGO_11417				1.86								2.2					Rho-associated, coiled-coil containing protein kinase 2	BF046300	nucleotide binding;protein kinase activity;protein kinase activity;protein kinase activity;protein kinase activity;protein serin... <Preview truncated at 128 characters>	cytokinesis;protein amino acid phosphorylation;protein amino acid phosphorylation;protein amino acid phosphorylation;protein ami... <Preview truncated at 128 characters>	intracellular;cytoplasm;cytoplasm;cytosol;plasma membrane;plasma membrane;membrane;spindle pole centrosome;
OAT	OLIGO_05989				-1.63			-2.45	-4.82							-4	-3.9	ornithine aminotransferase (gyrate atrophy)	BF046362	catalytic activity;ornithine-oxo-acid transaminase activity;protein binding;transaminase activity;transaminase activity;transami... <Preview truncated at 128 characters>		mitochondrion;mitochondrion;mitochondrial matrix;
LOC728216	OLIGO_08233							1.6								1.9			BF440165	ubiquitin thiolesterase activity;ubiquitin thiolesterase activity;	ubiquitin-dependent protein catabolic process;ubiquitin-dependent protein catabolic process;
NFKBIA	OLIGO_08439			2.29		1.82		3.09	3.38									nuclear factor of kappa light polypeptide gene enhancer in B-cells inhibitor, alpha	BF440215
EIF1B	OLIGO_07265				1.75								3						BF440279	translation initiation factor activity;translation initiation factor activity;translation initiation factor activity;protein bin... <Preview truncated at 128 characters>	translation;translational initiation;
IFIT5	OLIGO_07224							1.56	1.55							1.9	2.2	interferon-induced protein with tetratricopeptide repeats 5	BF440341	binding;
IRF8	OLIGO_05242							1.91			-1.9					2			BF440358	transcription factor activity;transcription factor activity;transcription factor activity;protein binding;	transcription;regulation of transcription, DNA-dependent;regulation of transcription, DNA-dependent;regulation of transcription,... <Preview truncated at 128 characters>	nucleus;nucleus;nucleus;nucleus;
GADD45B	OLIGO_11656							1.51	1.84				2.1				2.5	growth arrest and DNA-damage-inducible, beta	BF440435	protein binding;	activation of MAPKK activity;negative regulation of protein kinase activity;apoptosis;multicellular organismal development;cell ... <Preview truncated at 128 characters>
AHNAK	OLIGO_11458				-1.93								-3.1					AHNAK nucleoprotein (desmoyokin) (AHNAK), transcript variant 1	BF440510
TIFA	OLIGO_12965				1.53		1.83	2.69							2.1				BI540470	protein binding;	I-kappaB kinase/NF-kappaB cascade;
LPPR2	OLIGO_12710				-1.51				-1.72							-2			BM032276	catalytic activity;phosphatidate phosphatase activity;hydrolase activity;		membrane;membrane;membrane;integral to membrane;
RPGR	OLIGO_05522				1.54								2.5					retinitis pigmentosa GTPase regulator	BM361838	RNA binding;structural constituent of ribosome;structural constituent of ribosome;structural constituent of ribosome;structural ... <Preview truncated at 128 characters>	translation;translation;translation;immune system process;purine nucleotide biosynthetic process;AMP biosynthetic process;anti-a... <Preview truncated at 128 characters>	intracellular;intracellular;ribosome;ribosome;ribosome;small ribosomal subunit;ribonucleoprotein complex;cytoplasm;integral to p... <Preview truncated at 128 characters>
LILRB2	OLIGO_09779							2.08	1.58								2		BM361940
MRPL28	OLIGO_05527				-3.06	-1.88	1.62						-3.4					mitochondrial ribosomal protein L28	BM361943	transcription factor activity;	regulation of transcription;	mitochondrion;mitochondrion;mitochondrion;ribosome;ribonucleoprotein complex;
TXNRD1	OLIGO_05532								2.34								2.8	thioredoxin reductase 1	BM362012	thioredoxin-disulfide reductase activity;thioredoxin-disulfide reductase activity;thioredoxin-disulfide reductase activity;oxido... <Preview truncated at 128 characters>	mesoderm formation;gastrulation;cell proliferation;cell redox homeostasis;cell redox homeostasis;oxidation reduction;oxidation r... <Preview truncated at 128 characters>	nucleus;cytoplasm;cytoplasm;cytoplasm;cytoplasm;mitochondrion;cytosol;
RFX5	OLIGO_05536			1.82	-2.02							1.7	-2.1					regulatory factor X, 5 (influences HLA class II expression)	BM362040			cytoplasm;cytosol;mitochondrion;cytoplasm;
RGS2	OLIGO_09600								2.21							3.2	3.3	regulator of G-protein signaling 2, 24kDa	BM362277	signal transducer activity;GTPase activator activity;calmodulin binding;GTPase activator activity;identical protein binding;ATPa... <Preview truncated at 128 characters>	cell cycle;spermatogenesis;negative regulation of signal transduction;brown fat cell differentiation;regulation of G-protein cou... <Preview truncated at 128 characters>	cell surface;cytoskeleton;
LOC510480	OLIGO_09739				-1.61								-1.8						BM362799
Mrgprf	OLIGO_09950				1.79		2						2					MAS-related GPR, member F	BM362982	signal transducer activity;receptor activity;G-protein coupled receptor activity;signal transducer activity;receptor activity;G-... <Preview truncated at 128 characters>	signal transduction;G-protein coupled receptor protein signaling pathway;G-protein coupled receptor protein signaling pathway;si... <Preview truncated at 128 characters>	integral to membrane;integral to membrane;integral to membrane;integral to membrane;
MGC140677	OLIGO_09652				1.9								4				2.3		BM362989			cytoplasm;cytosol;
Bt.64609	OLIGO_09907				-1.95			1.6	1.64				-2.3				2.1		BM363176
UQCRH	OLIGO_05922				1.71	1.52								1.8			-1.8	ubiquinol-cytochrome c reductase hinge protein	BM363367	ubiquinol-cytochrome-c reductase activity;	mitochondrial electron transport, ubiquinol to cytochrome c;transport;electron transport chain;	mitochondrion;mitochondrion;mitochondrial inner membrane;mitochondrial inner membrane;mitochondrial inner membrane;membrane;resp... <Preview truncated at 128 characters>
Tmco1	OLIGO_05642				1.56								1.8					transmembrane and coiled-coil domains 1	BM363592			Golgi membrane;endoplasmic reticulum;endoplasmic reticulum membrane;Golgi apparatus;membrane;integral to membrane;
ADRBK2	OLIGO_05650						1.63								2.1			adrenergic, beta, receptor kinase 2	BM363657	nucleotide binding;protein kinase activity;protein kinase activity;protein kinase activity;protein serine/threonine kinase activ... <Preview truncated at 128 characters>	protein amino acid phosphorylation;protein amino acid phosphorylation;protein amino acid phosphorylation;protein amino acid phos... <Preview truncated at 128 characters>
Add1	OLIGO_09848				2.51								3					adducin 1 (alpha)	BM363681	metal ion binding;	biological_process;	cellular_component;
MYST4	OLIGO_09861				1.59								2.1					MYST histone acetyltransferase (monocytic leukemia) 4	BM363704	DNA binding;histone acetyltransferase activity;histone acetyltransferase activity;protein binding;transcription factor binding;z... <Preview truncated at 128 characters>	nucleosome assembly;negative regulation of transcription;histone H3 acetylation;positive regulation of transcription;regulation ... <Preview truncated at 128 characters>	nucleosome;nucleus;nucleus;MOZ/MORF histone acetyltransferase complex;nucleus;nucleosome;membrane fraction;integral to plasma me... <Preview truncated at 128 characters>
Centd1	OLIGO_05654							1.52	1.86						1.8		2.3	centaurin, delta 1	BM363713
Dtnb	OLIGO_09628		1.53		2.05		-1.53						2.5					dystrobrevin, beta	BM363749	protein binding;ribonucleoside-diphosphate reductase activity;	deoxyribonucleotide biosynthetic process;	cytoplasm;apical plasma membrane;
Mpeg1	OLIGO_09774						1.89	2.26	1.64						4			macrophage expressed gene 1	BM363755			membrane;membrane;integral to membrane;
FCGR3A	OLIGO_06039							1.71	1.63						2.4	3.8	3.1	Fc fragment of IgG, low affinity IIIa, receptor (CD16a)	BM364531	receptor activity;
IL10RA	OLIGO_09677							1.64	1.59							2.5		interleukin 10 receptor, alpha	BM364841
Samhd1	OLIGO_05408						2.19	3	3.23						2.5	2.3	3.3	SAM domain and HD domain 1	BM365025	catalytic activity;hydrolase activity;	innate immune response;regulation of innate immune response;regulation of innate immune response;defense response to virus;defen... <Preview truncated at 128 characters>	nucleus;nucleus;nucleus;nucleus;
RNF31	OLIGO_05420				1.81				1.55				2.5					ring finger protein 31	BM365273	zinc ion binding;zinc ion binding;zinc ion binding;		intracellular;intracellular;intracellular;
Acaa2	OLIGO_09820				1.96								3.2					acetyl-Coenzyme A acyltransferase 2 (mitochondrial 3-oxoacyl-Coenzyme A thiolase)	BM365867	catalytic activity;catalytic activity;acetyl-CoA C-acyltransferase activity;acyltransferase activity;transferase activity;transf... <Preview truncated at 128 characters>	lipid metabolic process;fatty acid metabolic process;metabolic process;metabolic process;metabolic process;metabolic process;met... <Preview truncated at 128 characters>	mitochondrion;mitochondrion;mitochondrion;mitochondrial inner membrane;
EIF1	OLIGO_10471				1.8	1.58		1.58					2.1					eukaryotic translation initiation factor 1	BM366260	translation initiation factor activity;translation initiation factor activity;translation initiation factor activity;	translation;translation;translational initiation;
IRF1	OLIGO_05476				-1.97		1.79	2.06	1.54				-2.4		2.2			interferon regulatory factor 1	BM366536	DNA binding;transcription factor activity;transcription factor activity;	transcription;regulation of transcription, DNA-dependent;regulation of transcription, DNA-dependent;regulation of transcription;	nucleus;nucleus;
TRERF1	OLIGO_05492						-1.59					-2.2						hepatocellular carcinoma-related HCRP1	BM366880	transcription factor activity;transcription factor binding;DNA bending activity;RNA polymerase II transcription mediator activit... <Preview truncated at 128 characters>	steroid biosynthetic process;cholesterol catabolic process;multicellular organismal development;homophilic cell adhesion;homophi... <Preview truncated at 128 characters>	nucleus;
Ddit4	OLIGO_05495						1.61	2.54	3							2.6	3.5	DNA-damage-inducible transcript 4	BM366955		apoptosis;negative regulation of signal transduction;	intracellular;cytoplasm;cytoplasm;cytoplasm;cytoplasm;cytoplasm;
SI	OLIGO_13156						-1.54		-3.45								-4.9	sucrase-isomaltase (alpha-glucosidase)	BM431211	1-phosphatidylinositol-4-phosphate 5-kinase activity;	phosphatidylinositol metabolic process;	Golgi apparatus;Golgi apparatus;brush border;
STAT3	OLIGO_13214							1.72								2		signal transducer and activator of transcription 3 (acute-phase response factor)	BP110564	DNA binding;DNA binding;transcription factor activity;transcription factor activity;transcription factor activity;transcription ... <Preview truncated at 128 characters>	temperature homeostasis;eye photoreceptor cell differentiation;transcription;regulation of transcription, DNA-dependent;regulati... <Preview truncated at 128 characters>	nucleus;nucleus;nucleus;nucleus;nucleus;nucleus;nucleus;cytoplasm;cytoplasm;cytoplasm;plasma membrane;nucleus;nucleus;nucleus;nu... <Preview truncated at 128 characters>
C1GALT1	OLIGO_12666						1.77	2.28	1.82									core 1 synthase, glycoprotein-N-acetylgalactosamine 3-beta-galactosyltransferase, 1	CB448815	glycoprotein-N-acetylgalactosamine 3-beta-galactosyltransferase activity;glycoprotein-N-acetylgalactosamine 3-beta-galactosyltra... <Preview truncated at 128 characters>	angiogenesis;angiogenesis;angiogenesis;angiogenesis;kidney development;kidney development;multicellular organismal development;c... <Preview truncated at 128 characters>	membrane;membrane;membrane;integral to membrane;integral to membrane;integral to membrane;
Fbxw5	OLIGO_12348				1.7		-1.61						2.5					F-box and WD-40 domain protein 5	CB460716			integral to plasma membrane;
BIRC3	OLIGO_12640				1.79	2.85	2.36	5.8	3.94				2.4	4.4	2.5	5.3	3.4	baculoviral IAP repeat-containing 3	CB538194	ubiquitin-protein ligase activity;protein binding;protein binding;protein binding;protein binding;zinc ion binding;metal ion bin... <Preview truncated at 128 characters>	regulation of apoptosis;	intracellular;intracellular;nucleus;cytoplasm;
LOC782274	OLIGO_09383				1.61		1.55	2.01	1.56				2.5			2.3	2.1		CK394111
ADCY4	OLIGO_12742				2.04								3.8					adenylate cyclase 4	CK773454	nucleotide binding;adenylate cyclase activity;lyase activity;phosphorus-oxygen lyase activity;phosphorus-oxygen lyase activity;	cyclic nucleotide biosynthetic process;cyclic nucleotide biosynthetic process;cyclic nucleotide biosynthetic process;	integral to membrane;
SLC25A23	OLIGO_13189				-2.04	-1.74			-1.68				-2.6			-2.1			CK776076
Usp12	OLIGO_12972				-1.75											-2		ubiquitin specific peptidase 12	CK776819	cysteine-type endopeptidase activity;cysteine-type endopeptidase activity;ubiquitin thiolesterase activity;ubiquitin thiolestera... <Preview truncated at 128 characters>	ubiquitin-dependent protein catabolic process;ubiquitin-dependent protein catabolic process;protein deubiquitination;protein deu... <Preview truncated at 128 characters>
CSPG4	OLIGO_05833								1.84								2.3	chondroitin sulfate proteoglycan 4	CK778818	collagen binding;protein kinase binding;protein binding;protein serine/threonine kinase activity;	activation of MAPK activity;transmembrane receptor protein tyrosine kinase signaling pathway;intracellular protein kinase cascad... <Preview truncated at 128 characters>	plasma membrane;integral to plasma membrane;axon part;cytosol;plasma membrane;
LOC652614	OLIGO_12361			2.07	-2.16								-3.4					similar to HLA class I histocompatibility antigen, A-11 alpha chain precursor (MHC class I antigen A*11)	CK831818	molecular_function;	antigen processing and presentation of peptide antigen via MHC class I;immune response;immune response;immune response;antigen p... <Preview truncated at 128 characters>	membrane;membrane;membrane;membrane;integral to membrane;MHC class I protein complex;MHC class I protein complex;MHC class I pro... <Preview truncated at 128 characters>
Apoa4	OLIGO_05694				-2.74				-4.01							-4.5	-5.7	apolipoprotein A-IV	CK846594	copper ion binding;lipid binding;lipid binding;antioxidant activity;cholesterol transporter activity;phosphatidylcholine binding... <Preview truncated at 128 characters>	innate immune response in mucosa;transport;lipid transport;lipid transport;lipid transport;response to lipid hydroperoxide;leuko... <Preview truncated at 128 characters>	extracellular region;extracellular region;extracellular region;extracellular space;extracellular space;very-low-density lipoprot... <Preview truncated at 128 characters>
MGC127510	OLIGO_12909				-1.87				-3.41								-3		CK945641	transporter activity;	sodium ion transport;transmembrane transport;	<31x31 double>
IFI16	OLIGO_12635				-1.68								-2.3					interferon, gamma-inducible protein 16	CK952947
Isg15	OLIGO_01345							2.33	4.02							2.4	6.1	ISG15 ubiquitin-like modifier	CN432461	protein binding;protein binding;protein tag;	response to virus;modification-dependent protein catabolic process;ISG15-protein conjugation;ISG15-protein conjugation;	extracellular region;extracellular region;cytoplasm;cytoplasm;
COX8A	OLIGO_07049				1.7								2.2					cytochrome c oxidase subunit 8A (ubiquitous)	CN433029
LIG1	OLIGO_11150			1.79	-2.23				-1.93				-3.1					ligase I, DNA, ATP-dependent (EC:6.5.1.1)	CN433185	nucleotide binding;DNA binding;DNA ligase (ATP) activity;DNA ligase (ATP) activity;DNA ligase (ATP) activity;DNA ligase (ATP) ac... <Preview truncated at 128 characters>	DNA replication;DNA replication;DNA replication;DNA replication;DNA replication;DNA repair;DNA repair;DNA repair;DNA repair;DNA ... <Preview truncated at 128 characters>
Eif4enif1	OLIGO_01630				1.81		2.76	2.05	1.82						3.2	2.7	2.8	eukaryotic translation initiation factor 4E nuclear import factor 1	CN433201	protein binding;protein binding;	cAMP biosynthetic process;transmembrane receptor protein tyrosine kinase signaling pathway;central nervous system development;po... <Preview truncated at 128 characters>	nucleus;cytoplasm;
MARCKS	OLIGO_10598							2.38	3.31							2.4	3.7	myristoylated alanine-rich protein kinase C substrate	CN433335	actin binding;protein kinase C binding;calmodulin binding;calmodulin binding;		cytoplasm;cytoplasm;cytoplasm;centrosome;plasma membrane;plasma membrane;cell cortex;membrane;membrane;germinal vesicle;
Slc38a2	OLIGO_01641							1.55	1.77								1.9		CN433928	amino acid transmembrane transporter activity;symporter activity;amino acid transmembrane transporter activity;	transport;ion transport;sodium ion transport;amino acid transport;amino acid transport;amino acid transport;	plasma membrane;plasma membrane;plasma membrane;membrane;integral to membrane;plasma membrane;
PSMA5	OLIGO_10632		-1.96								-2.7							proteasome (prosome, macropain) subunit, alpha type, 5	CN434535	endopeptidase activity;threonine-type endopeptidase activity;threonine-type endopeptidase activity;protein binding;peptidase act... <Preview truncated at 128 characters>	ubiquitin-dependent protein catabolic process;proteolysis involved in cellular protein catabolic process;	proteasome complex;nucleus;nucleus;cytoplasm;cytoplasm;proteasome core complex;proteasome core complex, alpha-subunit complex;
CYB5	OLIGO_09258							-1.67	-2.05							-3.6	-2.8	cytochrome b5 type A (microsomal)	CN435369
SNRPG	OLIGO_11187		-1.54	1.71	-1.59			-1.57	-1.67			2.1						small nuclear ribonucleoprotein polypeptide G	CN435437	RNA binding;protein binding;protein binding;	mRNA processing;RNA splicing;spliceosome assembly;spliceosome assembly;RNA splicing;RNA splicing;	nucleus;nucleus;spliceosomal complex;U7 snRNP;ribonucleoprotein complex;small nuclear ribonucleoprotein complex;small nuclear ri... <Preview truncated at 128 characters>
GPX4	OLIGO_11188				-2.45								-4					glutathione peroxidase 4 (phospholipid hydroperoxidase)	CN435446	peroxidase activity;glutathione peroxidase activity;glutathione peroxidase activity;oxidoreductase activity;phospholipid-hydrope... <Preview truncated at 128 characters>	chromatin organization;response to oxidative stress;multicellular organismal development;spermatogenesis;oxidation reduction;oxi... <Preview truncated at 128 characters>	nucleus;nuclear envelope;cytoplasm;cytoplasm;mitochondrion;mitochondrion;mitochondrion;mitochondrial inner membrane;cytosol;
HERC6	OLIGO_01879							3.01	2.57							4.3	2.4		CN435536	acid-amino acid ligase activity;	protein modification process;	intracellular;
Ugcg	OLIGO_01949				1.52				1.76								2	UDP-glucose ceramide glucosyltransferase	CN435714	transferase activity;transferase activity, transferring glycosyl groups;
Apoa1	OLIGO_10586			1.76	-3.88	-1.53	-2.57	-2.04	-15.65							-11.7	-22.8	apolipoprotein A-I	CN435718	beta-amyloid binding;lipid transporter activity;phospholipid binding;high-density lipoprotein binding;lipid binding;cholesterol ... <Preview truncated at 128 characters>	regulation of protein amino acid phosphorylation;endothelial cell proliferation;negative regulation of cytokine secretion during... <Preview truncated at 128 characters>	extracellular region;extracellular region;extracellular region;extracellular region;extracellular space;endocytic vesicle;cytopl... <Preview truncated at 128 characters>
SEPP1	OLIGO_06877			1.84	-2.24			-2.3	-6.15				-2.2			-3.8	-5.3	selenoprotein P, plasma, 1	CN435807
RAD21	OLIGO_11175		-1.53		-1.67		1.67		-1.85				-2.3			-2.1		RAD21 homolog (S. pombe)	CN436040	protein binding;	DNA repair;apoptosis;response to DNA damage stimulus;cell cycle;chromosome segregation;mitosis;cell division;positive regulation... <Preview truncated at 128 characters>	nuclear chromosome;nucleus;nucleus;
FLJ22675	OLIGO_02111								1.5								2.5		CN436289
Arnt2	OLIGO_07554				1.55								4.8					aryl hydrocarbon receptor nuclear translocator 2	CN436457	transcription factor activity;cytoskeletal protein binding;transcription factor activity;transcription corepressor activity;prot... <Preview truncated at 128 characters>	in utero embryonic development;response to hypoxia;cell proliferation;G1 phase of mitotic cell cycle;negative regulation of tran... <Preview truncated at 128 characters>	nucleus;nucleoplasm;transcription factor complex;nucleus;
NDUFB6	OLIGO_07539				1.9								2.6					NADH dehydrogenase (ubiquinone) 1 beta subcomplex, 6, 17kDa	CN436515		transport;electron transport chain;	mitochondrion;mitochondrion;mitochondrial inner membrane;mitochondrial inner membrane;mitochondrial respiratory chain complex I;... <Preview truncated at 128 characters>
LOC618437	OLIGO_10549				-1.86	-1.83							-2.2						CN436618
AKAP8L	OLIGO_02211				-2.62								-3.5					A kinase (PRKA) anchor protein 8-like	CN436648	DNA binding;DNA binding;	biological_process;	nucleus;nucleus;
LUM	OLIGO_02248				-2.05				-1.69								-2.2	lumican	CN436729	protein binding;collagen binding;		extracellular region;proteinaceous extracellular matrix;proteinaceous extracellular matrix;proteinaceous extracellular matrix;pr... <Preview truncated at 128 characters>
Tagln3	OLIGO_07629				1.92								3.1					transgelin 3	CN436951		muscle organ development;
SAP30BP	OLIGO_02318				-1.71								-2.7					SAP30 binding protein	CN437010	protein binding;	induction of apoptosis;	nucleus;
Acot7	OLIGO_07598								1.5				2.2					acyl-CoA thioesterase 7	CN437352	palmitoyl-CoA hydrolase activity;	fatty acid catabolic process;	cytosol;
Klhl9	OLIGO_02443				1.51								2.3						CN437566	protein binding;protein binding;protein binding;
TMEM158	OLIGO_02461							1.61	2.86								6.7		CN437627	protein binding;		membrane;membrane;integral to membrane;
LOC614391	OLIGO_02479				1.63								3.5						CN437677
Trafd1	OLIGO_02483				1.66								1.7					TRAF type zinc finger domain containing 1	CN437685	zinc ion binding;metal ion binding;		intracellular;
AKT2	OLIGO_02472				2.04								2.2					v-akt murine thymoma viral oncogene homolog 2	CN437742	protein serine/threonine kinase activity;calcium ion binding;G-protein coupled receptor activity;	positive regulation of sodium ion transport;hormone transport;cell-cell adhesion;neurological system process;inner ear developme... <Preview truncated at 128 characters>	soluble fraction;microsome;cytosol;plasma membrane;insulin-responsive compartment;plasma membrane;
ATP1B3	OLIGO_08471				-2.42				-2.63				-2.5				-3.5	ATPase, Na+/K+ transporting, beta 3 polypeptide (EC:3.6.3.9)	CN437827	sodium:potassium-exchanging ATPase activity;protein binding;protein binding;	ATP biosynthetic process;transport;ion transport;potassium ion transport;potassium ion transport;potassium ion transport;sodium ... <Preview truncated at 128 characters>	cytoplasm;membrane;membrane;membrane;integral to membrane;melanosome;
EMX1	OLIGO_02535			1.52	-2.15								-2.7					empty spiracles homeobox 1	CN437946		brain development;post-embryonic development;cerebral cortex regionalization;neuron differentiation;neuron migration;axon guidan... <Preview truncated at 128 characters>	nucleus;dendrite;
Wars	OLIGO_10714						1.76	6.7	11.6							6	5.5	tryptophanyl-tRNA synthetase (EC:6.1.1.2)	CN438008	nucleotide binding;nucleotide binding;nucleotide binding;nucleotide binding;aminoacyl-tRNA ligase activity;aminoacyl-tRNA ligase... <Preview truncated at 128 characters>	translation;translation;translation;translation;tRNA aminoacylation for protein translation;tRNA aminoacylation for protein tran... <Preview truncated at 128 characters>	cytoplasm;cytoplasm;cytoplasm;cytoplasm;cytoplasm;soluble fraction;cytoplasm;
MCL1	OLIGO_02544								2.05							2.1	2.1	myeloid cell leukemia sequence 1 (BCL2-related)	CN438032		regulation of apoptosis;regulation of apoptosis;regulation of apoptosis;regulation of apoptosis;regulation of apoptosis;
Grtp1	OLIGO_07716				-1.64											-1.8	-1.8	GH regulated TBC protein 1	CN438048	Rab GTPase activator activity;	regulation of Rab GTPase activity;	intracellular;
PRPF4	OLIGO_07814				2								3.8					PRP4 pre-mRNA processing factor 4 homolog (yeast)	CN438137		mRNA processing;RNA splicing;RNA splicing;	nucleus;spliceosomal complex;Cajal body;nuclear speck;
ca3	OLIGO_02592			-2.05								-2.2					2.5	carbonic anhydrase 3	CN438145	carbonate dehydratase activity;carbonate dehydratase activity;carbonate dehydratase activity;zinc ion binding;zinc ion binding;n... <Preview truncated at 128 characters>	one-carbon metabolic process;one-carbon metabolic process;	cytoplasm;cytoplasm;cytoplasm;
Mrps34	OLIGO_08351				-1.73								-2.7					mitochondrial ribosomal protein S34	CN438192			mitochondrion;mitochondrion;mitochondrion;ribosome;ribonucleoprotein complex;
GM2A	OLIGO_10676								-1.77								-1.7	GM2 ganglioside activator	CN438214	sphingolipid activator protein activity;	glycolipid catabolic process;sphingolipid catabolic process;	lysosome;
Dhx37	OLIGO_02632				-1.79				-1.53				-2						CN438264		central nervous system neuron development;
HMGA2	OLIGO_02651				1.65								2.1					high mobility group AT-hook 2	CN438424
CN438591	OLIGO_02681				1.86								2.5						CN438591
YWHAZ	OLIGO_02737						1.51		1.77								2.3	tyrosine 3-monooxygenase/tryptophan 5-monooxygenase activation protein, zeta polypeptide	CN438661	transcription factor binding;protein domain specific binding;		cytoplasm;cytoplasm;melanosome;
Ubap2l	OLIGO_02764				1.57								1.7						CN438798	protein binding;protein binding;
MARCKSL1	OLIGO_02798							2.09	2.47							2.2	2.8		CN439003	calmodulin binding;calmodulin binding;
LOC515425	OLIGO_11284				-1.79								-3						CN439115
HIF1A	OLIGO_11560				1.6		1.63	2.66	3.71						1.8	2.9	4.6	hypoxia-inducible factor 1, alpha subunit (basic helix-loop-helix transcription factor)	CN439520	DNA binding;transcription factor activity;transcription factor activity;signal transducer activity;protein binding;transcription... <Preview truncated at 128 characters>	angiogenesis;response to hypoxia;response to hypoxia;neural crest cell migration;epithelial to mesenchymal transition;embryonic ... <Preview truncated at 128 characters>	nucleus;nucleus;nucleus;nucleus;nucleus;cytoplasm;cytoplasm;microtubule-based flagellum;nucleus;nucleus;nucleus;microtubule-base... <Preview truncated at 128 characters>
Plac8	OLIGO_07274				-1.59			3.01	2.99							3.8	5.7	placenta-specific 8	CN439555
CSRP2	OLIGO_07333							1.68	2.48								4.3	cysteine and glycine-rich protein 2	CN439691	zinc ion binding;metal ion binding;	multicellular organismal development;cell differentiation;	nucleus;nucleus;
PTGDS	OLIGO_08018		1.51		1.54			-1.53					2.3					prostaglandin D2 synthase 21kDa (brain)	CN439736	prostaglandin-D synthase activity;prostaglandin-D synthase activity;transporter activity;transporter activity;transporter activi... <Preview truncated at 128 characters>	prostaglandin biosynthetic process;prostaglandin biosynthetic process;lipid metabolic process;fatty acid biosynthetic process;tr... <Preview truncated at 128 characters>	extracellular region;extracellular region;extracellular region;extracellular region;nucleus;cytoplasm;endoplasmic reticulum;roug... <Preview truncated at 128 characters>
Ace2	OLIGO_02055			2.1	-2.07				-6.63								-4.1	angiotensin I converting enzyme (peptidyl-dipeptidase A) 2	CN440242	carboxypeptidase activity;peptidase activity;metallopeptidase activity;metallopeptidase activity;peptidyl-dipeptidase activity;h... <Preview truncated at 128 characters>	proteolysis;proteolysis;entry of virus into host cell;	extracellular region;extracellular region;plasma membrane;plasma membrane;membrane;membrane;integral to membrane;membrane;extrac... <Preview truncated at 128 characters>
ITGB1	OLIGO_07690							1.56	2.27								2.9	integrin, beta 1 (fibronectin receptor, beta polypeptide, antigen CD29 includes MDF2, MSK12)	CN440330	receptor activity;receptor activity;receptor activity;receptor activity;receptor activity;receptor activity;receptor activity;re... <Preview truncated at 128 characters>	G1/S transition of mitotic cell cycle;in utero embryonic development;cell fate specification;cell adhesion;cell adhesion;cell ad... <Preview truncated at 128 characters>	plasma membrane;plasma membrane;integrin complex;integrin complex;integrin complex;integrin complex;integrin complex;integrin co... <Preview truncated at 128 characters>
DDX3X	OLIGO_03116					1.57		1.66								1.8		DEAD (Asp-Glu-Ala-Asp) box polypeptide 3, X-linked	CN440452	growth factor activity;	embryonic pattern specification;induction of an organ;cell-cell signaling;negative regulation of cell differentiation;inner ear ... <Preview truncated at 128 characters>
LOC646396	OLIGO_03132				-1.97											-2			CN440486
Bt.73604	OLIGO_07899		2.01		1.65						3.3								CN440514
Eif3s3	OLIGO_11308				-1.78								-4.1					eukaryotic translation initiation factor 3, subunit H	CN440565	translation initiation factor activity;translation initiation factor activity;translation initiation factor activity;protein bin... <Preview truncated at 128 characters>	translation;translational initiation;translational initiation;	cytoplasm;cytoplasm;eukaryotic translation initiation factor 3 complex;eukaryotic translation initiation factor 3 complex;eukary... <Preview truncated at 128 characters>
Vps11	OLIGO_03173								1.88								2.1	vacuolar protein sorting 11 (yeast)	CN440693	binding;protein binding;protein binding;protein binding;zinc ion binding;metal ion binding;		early endosome;actin filament;HOPS complex;
Erbb2ip	OLIGO_07742				1.72								2					Erbb2 interacting protein	CN441074	integrin binding;structural constituent of cytoskeleton;ErbB-2 class receptor binding;structural constituent of cytoskeleton;Erb... <Preview truncated at 128 characters>	cell cycle;cell adhesion;integrin-mediated signaling pathway;cell growth;intermediate filament cytoskeleton organization;basal p... <Preview truncated at 128 characters>	nucleus;cytoplasm;hemidesmosome;basement membrane;nucleus;cytoplasm;hemidesmosome;basement membrane;nucleus;cytoplasm;integral t... <Preview truncated at 128 characters>
PPA1	OLIGO_03362							2.65	3.1							2.9	2.8	pyrophosphatase (inorganic) 1	CN441261	magnesium ion binding;inorganic diphosphatase activity;inorganic diphosphatase activity;hydrolase activity;metal ion binding;	phosphate metabolic process;	cytoplasm;cytoplasm;cytoplasm;
APCDD1	OLIGO_11332				-2.34		1.55		-1.61				-2.7						CN441328
TMEM104	OLIGO_03382				-3.02	-1.56			-1.83				-3.6					transmembrane protein 104	CN441403			membrane;integral to membrane;
SLC2A1	OLIGO_10777								2.1							3.1	6.2	solute carrier family 2 (facilitated glucose transporter), member 1	CN441490	transporter activity;transporter activity;glucose transmembrane transporter activity;protein binding;substrate-specific transmem... <Preview truncated at 128 characters>	transport;transport;transport;transport;carbohydrate transport;glucose transport;glucose import;transmembrane transport;transmem... <Preview truncated at 128 characters>	intracellular;cytoplasm;plasma membrane;plasma membrane;plasma membrane;integral to plasma membrane;membrane;membrane;membrane;m... <Preview truncated at 128 characters>
FGFR3	OLIGO_03517							-1.56	-2.03							-3.5	-3.2	fibroblast growth factor receptor 3 (achondroplasia, thanatophoric dwarfism)	CN442012	receptor activity;fibroblast growth factor receptor activity;protein binding;nucleotide binding;protein kinase activity;protein ... <Preview truncated at 128 characters>	MAPKKK cascade;morphogenesis of an epithelium;positive regulation of cell proliferation;forebrain development;positive regulatio... <Preview truncated at 128 characters>	lysosome;internal side of plasma membrane;perinuclear region of cytoplasm;lysosome;internal side of plasma membrane;membrane;int... <Preview truncated at 128 characters>
ZFPL1	OLIGO_07427				1.62								2.5					zinc finger protein-like 1	CN442028	metal ion binding;	transport;vesicle-mediated transport;	Golgi apparatus;Golgi apparatus;Golgi apparatus;membrane;integral to membrane;
HNRPU	OLIGO_03585				-1.58								-2					heterogeneous nuclear ribonucleoprotein U (scaffold attachment factor A)	CN442307	nucleic acid binding;nucleic acid binding;protein binding;protein binding;ATP binding;protein binding;protein binding;ATP bindin... <Preview truncated at 128 characters>	cell killing;CRD-mediated mRNA stabilization;cell killing;CRD-mediated mRNA stabilization;	ribonucleoprotein complex;CRD-mediated mRNA stability complex;CRD-mediated mRNA stability complex;
LOC652614	OLIGO_12362				-2.51	-1.67		1.53					-2.6					similar to HLA class I histocompatibility antigen, A-11 alpha chain precursor (MHC class I antigen A*11)	CN999995		immune response;immune response;antigen processing and presentation;antigen processing and presentation;	membrane;membrane;integral to membrane;MHC class I protein complex;
Kcnk12	OLIGO_13197				2.18								2.1						CO879600
BoLA-DRB3	OLIGO_12364				-3.45	-1.51	1.67						-4.1					major histocompatibility complex, class II, DRB3	CO889316		antigen processing and presentation of peptide or polysaccharide antigen via MHC class II;immune response;antigen processing and... <Preview truncated at 128 characters>	membrane;integral to membrane;MHC class II protein complex;MHC class II protein complex;membrane;integral to membrane;MHC class ... <Preview truncated at 128 characters>
Spcs3	OLIGO_07145				1.84								2.7					signal peptidase complex subunit 3 homolog (S. cerevisiae)	CR451631	peptidase activity;peptidase activity;hydrolase activity;	signal peptide processing;	endoplasmic reticulum;endoplasmic reticulum;signal peptidase complex;endoplasmic reticulum membrane;microsome;microsome;membrane... <Preview truncated at 128 characters>
ANXA2	OLIGO_06876				2.02				2.12				3.7				3.6	annexin A2	CR451651	phospholipase inhibitor activity;calcium ion binding;calcium ion binding;calcium ion binding;calcium ion binding;calcium-depende... <Preview truncated at 128 characters>	angiogenesis;collagen fibril organization;fibrinolysis;	extracellular region;proteinaceous extracellular matrix;basement membrane;basement membrane;cytoplasm;early endosome;sarcolemma;... <Preview truncated at 128 characters>
Ssrp1	OLIGO_10157				-1.67								-2.3					structure specific recognition protein 1	CR451784	DNA binding;DNA binding;protein binding;DNA binding;DNA binding;protein binding;protein binding;DNA binding;		nucleus;nucleus;nucleus;cytoplasm;nucleus;nucleus;nucleus;cytoplasm;
SEPHS2	OLIGO_07936				1.71								1.8					selenophosphate synthetase 2	CR451801	ATP binding;catalytic activity;selenide, water dikinase activity;ATP binding;catalytic activity;selenide, water dikinase activit... <Preview truncated at 128 characters>	biological_process;biological_process;	cellular_component;cellular_component;
BCL7C	OLIGO_00512				-2.28	-1.73	2		-1.63				-2.3					B-cell CLL/lymphoma 7C	CR451870
LOC390354	OLIGO_06806			1.91	-2.78								-3.1						CR452147	structural constituent of ribosome;structural constituent of ribosome;protein binding;RNA binding;RNA binding;RNA binding;protei... <Preview truncated at 128 characters>	translation;translation;	intracellular;intracellular;ribosome;ribosome;ribosome;ribonucleoprotein complex;
ZNF550	OLIGO_00560				-1.74								-1.9						CR452212
DUT	OLIGO_08004								-1.97								-2.9	deoxyuridine triphosphatase	CR452397	dUTP diphosphatase activity;hydrolase activity;	dUTP metabolic process;dUTP metabolic process;	mitochondrion;
RPL5	OLIGO_07285				-2.35								-3.2					ribosomal protein L5	CR452490	RNA binding;structural constituent of ribosome;structural constituent of ribosome;5S rRNA binding;rRNA binding;	translation;translation;	intracellular;intracellular;nucleus;nucleolus;cytoplasm;cytoplasm;ribosome;ribosome;ribosome;ribonucleoprotein complex;
MGC142357	OLIGO_00919		-1.64		-2.45	-1.54							-3.1						CR452513	transporter activity;secondary active sulfate transmembrane transporter activity;secondary active sulfate transmembrane transpor... <Preview truncated at 128 characters>	transport;chloride transport;sulfate transport;sulfate transport;bicarbonate transport;formate transport;transmembrane transport... <Preview truncated at 128 characters>	membrane fraction;integral to plasma membrane;membrane;membrane;membrane;membrane;integral to membrane;integral to membrane;
MIF	OLIGO_08252							-1.86	-1.73							-2.4		macrophage migration inhibitory factor (glycosylation-inhibiting factor)	CR452765	dopachrome isomerase activity;dopachrome isomerase activity;dopachrome isomerase activity;cytokine activity;cytokine activity;is... <Preview truncated at 128 characters>	prostaglandin biosynthetic process;inflammatory response;cell surface receptor linked signaling pathway;cell proliferation;carbo... <Preview truncated at 128 characters>	extracellular region;extracellular region;extracellular region;extracellular space;cytoplasm;cytoplasm;
GTF2A2	OLIGO_09466				1.79								2.3					general transcription factor IIA, 2, 12kDa	CR452841	RNA polymerase II transcription factor activity;RNA polymerase II transcription factor activity;RNA polymerase II transcription ... <Preview truncated at 128 characters>	transcription initiation from RNA polymerase II promoter;transcription initiation from RNA polymerase II promoter;transcription ... <Preview truncated at 128 characters>	transcription factor TFIIA complex;transcription factor TFIIA complex;transcription factor TFIIA complex;transcription factor TF... <Preview truncated at 128 characters>
Rnf19	OLIGO_00849							1.5					2					ring finger protein 19A	CR453307	transcription factor binding;identical protein binding;alpha-N-acetylneuraminate alpha-2,8-sialyltransferase activity;	microtubule cytoskeleton organization;protein modification process;glycosphingolipid biosynthetic process;carbohydrate metabolic... <Preview truncated at 128 characters>	centrosome;
S100A11	OLIGO_10776								2.74								3.8	S100 calcium binding protein A11	CR453487	calcium ion binding;calcium ion binding;protein homodimerization activity;S100 beta binding;calcium-dependent protein binding;pr... <Preview truncated at 128 characters>	signal transduction;negative regulation of DNA replication;negative regulation of cell proliferation;	ruffle;nucleus;ruffle;nucleus;cytoplasm;
RPS6	OLIGO_10612				-1.6				-1.5				-1.9					ribosomal protein S6	CR453525	structural constituent of ribosome;	translation;	ribosome;intracellular;
LOC441698	OLIGO_11223				-1.84	-1.62							-2.7			-2.1			CR453771
Abhd8	OLIGO_00728				1.84								4.8					abhydrolase domain containing 8	CR453780	catalytic activity;hydrolase activity;
BHLHB2	OLIGO_10026					1.53	2.55	3.99	5.82							4.8	5.7	basic helix-loop-helix domain containing, class B, 2	CR453860
MAP4K4	OLIGO_07953								1.62								2.7	mitogen-activated protein kinase kinase kinase kinase 4	CR453978
ACSL4	OLIGO_11286								1.89								3.6	acyl-CoA synthetase long-chain family member 4	CR454195	catalytic activity;long-chain fatty acid-CoA ligase activity;long-chain fatty acid-CoA ligase activity;protein binding;	metabolic process;embryonic process involved in female pregnancy;response to hypoxia;negative regulation of transcription factor... <Preview truncated at 128 characters>	mitochondrion;plasma membrane;
FDPS	OLIGO_07336				2.22	1.91			1.52				3					farnesyl diphosphate synthase (farnesyl pyrophosphate synthetase, dimethylallyltranstransferase, ger	CR454205	dimethylallyltranstransferase activity;geranyltranstransferase activity;transferase activity;metal ion binding;transferase activ... <Preview truncated at 128 characters>	steroid biosynthetic process;cholesterol biosynthetic process;isoprenoid biosynthetic process;isoprenoid biosynthetic process;li... <Preview truncated at 128 characters>	cytoplasm;cytoplasm;
PYCRL	OLIGO_00691				-1.68								-2.9					pyrroline-5-carboxylate reductase-like	CR454264	catalytic activity;pyrroline-5-carboxylate reductase activity;pyrroline-5-carboxylate reductase activity;binding;oxidoreductase ... <Preview truncated at 128 characters>	proline biosynthetic process;proline biosynthetic process;metabolic process;cellular amino acid biosynthetic process;oxidation r... <Preview truncated at 128 characters>
Rbed1	OLIGO_10186		1.51		1.93								2.4					RNA binding motif and ELMO domain 1	CR454354		phagocytosis;phagocytosis;	cytoskeleton;cytoskeleton;
FLNB	OLIGO_09845								2.46								6.1	filamin B, beta (actin binding protein 278)	CR454496	protein binding;actin binding;protein binding;zinc ion binding;cytidine deaminase activity;	cytoskeletal anchoring at plasma membrane;cytidine to uridine editing;cytidine to uridine editing;lipid metabolic process;mRNA s... <Preview truncated at 128 characters>	stress fiber;focal adhesion;cytoplasm;
POLR1D	OLIGO_07905				1.6								2.1					polymerase (RNA) I polypeptide D, 16kDa	CR454537	DNA binding;DNA binding;DNA-directed RNA polymerase activity;DNA-directed RNA polymerase activity;DNA-directed RNA polymerase ac... <Preview truncated at 128 characters>	transcription;transcription;transcription;transcription;	nucleus;nucleus;DNA-directed RNA polymerase I complex;
Serinc1	OLIGO_10207				1.77								2.2						CR454540
THBS1	OLIGO_07311				1.55	1.72	1.64	2.65	7.99							6.3	14	thrombospondin 1	CR454665	fibronectin binding;integrin binding;structural molecule activity;calcium ion binding;calcium ion binding;heparin binding;hepari... <Preview truncated at 128 characters>	activation of MAPK activity;negative regulation of endothelial cell proliferation;sprouting angiogenesis;chronic inflammatory re... <Preview truncated at 128 characters>	extracellular region;fibrinogen complex;external side of plasma membrane;
ITGB2	OLIGO_11267				-1.82								-2					integrin, beta 2 (complement component 3 receptor 3 and 4 subunit)	CR454674	glycoprotein binding;receptor activity;receptor activity;receptor activity;receptor activity;receptor activity;receptor activity... <Preview truncated at 128 characters>	cell adhesion;cell adhesion;cell adhesion;cell adhesion;cell adhesion;cell adhesion;cell adhesion;cell adhesion;leukocyte cell-c... <Preview truncated at 128 characters>	cytoplasm;integrin complex;integrin complex;integrin complex;integrin complex;integrin complex;integrin complex;integrin complex... <Preview truncated at 128 characters>
PDIA4	OLIGO_11079				-1.82		1.51						-2.2					protein disulfide isomerase family A, member 4	CR454689	protein disulfide isomerase activity;protein disulfide isomerase activity;protein binding;protein binding;isomerase activity;iso... <Preview truncated at 128 characters>	cell redox homeostasis;cell redox homeostasis;cell redox homeostasis;cell redox homeostasis;cell redox homeostasis;cell redox ho... <Preview truncated at 128 characters>	endoplasmic reticulum;endoplasmic reticulum;endoplasmic reticulum;endoplasmic reticulum lumen;endoplasmic reticulum lumen;melano... <Preview truncated at 128 characters>
Cct6a	OLIGO_06710			1.52	-1.74				-2.03								-2.1	chaperonin containing TCP1, subunit 6A (zeta 1)	CR454705	RNA binding;mRNA binding;structural constituent of ribosome;structural constituent of ribosome;structural constituent of ribosom... <Preview truncated at 128 characters>	translation;translation;translation;regulation of translational fidelity;	intracellular;ribosome;ribosome;small ribosomal subunit;cytosolic small ribosomal subunit;cytosolic small ribosomal subunit;ribo... <Preview truncated at 128 characters>
ZNF367	OLIGO_07395			1.93	-2.54				-1.96				-3.6						CR455086
PSMC5	OLIGO_11319				-2.21	-1.61							-3.6	-1.7				proteasome (prosome, macropain) 26S subunit, ATPase, 5	CR455154	nucleotide binding;nucleotide binding;receptor binding;protein binding;ATP binding;ATP binding;ATP binding;transcription factor ... <Preview truncated at 128 characters>	negative regulation of transcription;protein catabolic process;proteasomal ubiquitin-dependent protein catabolic process;	proteasome complex;proteasome complex;proteasome complex;nucleus;nucleus;nucleus;nucleus;cytoplasm;cytoplasm;cytoplasm;cytoplasm... <Preview truncated at 128 characters>
RPL21	OLIGO_10614		-1.68		-1.93				-1.86				-2.4					ribosomal protein L21	CR455267	RNA binding;RNA binding;RNA binding;structural constituent of ribosome;structural constituent of ribosome;structural constituent... <Preview truncated at 128 characters>	translation;positive regulation of cell adhesion;anti-apoptosis;positive regulation of cell proliferation;
Phgdh	OLIGO_10035				2.36								2.5	1.6				phosphoglycerate dehydrogenase (EC:1.1.1.95)	CR455498	catalytic activity;phosphoglycerate dehydrogenase activity;phosphoglycerate dehydrogenase activity;phosphoglycerate dehydrogenas... <Preview truncated at 128 characters>	glutamine metabolic process;glycine metabolic process;L-serine biosynthetic process;L-serine biosynthetic process;L-serine biosy... <Preview truncated at 128 characters>
Lsm3	OLIGO_10562				1.73								2.7					LSM3 homolog, U6 small nuclear RNA associated (S. cerevisiae)	CR455506	RNA binding;protein binding;	mRNA processing;RNA splicing;	nucleus;nucleus;spliceosomal complex;ribonucleoprotein complex;
U2af2	OLIGO_09406				-1.64				-2.24				-1.8				-1.9	U2 small nuclear ribonucleoprotein auxiliary factor (U2AF) 2	CR455529
Mtf2	OLIGO_00870				-2.13								-2.8					metal response element binding transcription factor 2	CR455869	protein binding;zinc ion binding;zinc ion binding;metal ion binding;
LOC515401	OLIGO_00370				-2.29								2.6						CR455873	zinc ion binding;metal ion binding;	positive regulation of fibroblast proliferation;	plasma membrane;plasma membrane;focal adhesion;focal adhesion;membrane;cell junction;
Adm	OLIGO_10789							2.37	2.18							4.7	3.2	adrenomedullin	CR456002	hormone activity;hormone activity;hormone activity;	neural tube closure;heart development;positive regulation of cell proliferation;negative regulation of vasoconstriction;developm... <Preview truncated at 128 characters>	extracellular region;extracellular region;extracellular region;extracellular region;extracellular space;cytoplasm;
GJA1	OLIGO_11052								1.71								3.2	gap junction protein, alpha 1, 43kDa	CR456025	signal transducer activity;gap junction channel activity;SH3 domain binding;transmembrane transporter activity;PDZ domain bindin... <Preview truncated at 128 characters>	in utero embryonic development;neuron migration;heart looping;epithelial cell maturation;cell communication;cell communication;c... <Preview truncated at 128 characters>	cytoplasm;lysosome;early endosome;late endosome;multivesicular body;endoplasmic reticulum;plasma membrane;plasma membrane;fascia... <Preview truncated at 128 characters>
KIF19	OLIGO_00526				1.52								3.1					kinesin family member 19	CR456050	ATP binding;microtubule motor activity;	microtubule-based movement;	cellular_component;
Antxr2	OLIGO_00995							3.57	5.3							7.2	9.9	anthrax toxin receptor 2	CR456095	receptor activity;receptor activity;receptor activity;		integral to membrane;integral to membrane;
ZNF509	OLIGO_11643				-2.22		1.71						-3.6						CR550477
Aaas	OLIGO_00199				-1.62								-2.5					achalasia, adrenocortical insufficiency, alacrimia	CR550530		learning;fertilization;regulation of nucleocytoplasmic transport;	nuclear pore;nuclear pore;
Ldlr	OLIGO_10415								1.73					2	2.3		2.6	low density lipoprotein receptor	CR551180	receptor activity;low-density lipoprotein receptor activity;low-density lipoprotein receptor activity;very-low-density lipoprote... <Preview truncated at 128 characters>	lipid metabolic process;lipid metabolic process;transport;lipid transport;endocytosis;steroid metabolic process;cholesterol meta... <Preview truncated at 128 characters>	endosome;coated pit;coated pit;membrane;membrane;membrane;integral to membrane;low-density lipoprotein particle;plasma membrane;... <Preview truncated at 128 characters>
Bt.9841	OLIGO_00242						1.61	2.77	2.72					1.7		2.6	2.7		CR551429
Ubap1	OLIGO_01239								1.79						1.7		2.3	ubiquitin associated protein 1	CR552058			cytoplasm;
LOC508663	OLIGO_06976		1.55		1.83						1.7		2.5						CR552443	protein binding;zinc ion binding;zinc ion binding;		intracellular;intracellular;
CR552488	OLIGO_10537				-2.16				-1.78				-2.5					Transcribed locus	CR552488
Atp13a3	OLIGO_07118						1.68	1.71	1.67						2.2				CR552826
NDUFS7	OLIGO_06703						-1.63								-1.9			NADH dehydrogenase (ubiquinone) Fe-S protein 7, 20kDa (NADH-coenzyme Q reductase)	CR552975	NADH dehydrogenase activity;NADH dehydrogenase (ubiquinone) activity;NADH dehydrogenase (ubiquinone) activity;NADH dehydrogenase... <Preview truncated at 128 characters>	transport;electron transport chain;mitochondrial respiratory chain complex I assembly;oxidation reduction;oxidation reduction;ox... <Preview truncated at 128 characters>	mitochondrion;mitochondrion;mitochondrion;mitochondrial inner membrane;mitochondrial respiratory chain complex I;respiratory cha... <Preview truncated at 128 characters>
SIKE	OLIGO_07071				1.64								2.6					suppressor of IKK epsilon	CR553356			cytoplasm;cytoplasm;
LOC404122	OLIGO_10607								2.45								2.3	no description	CR553471	nucleotide binding;structural constituent of cytoskeleton;protein binding;ATP binding;ATP binding;identical protein binding;	sarcomere organization;	soluble fraction;cytoplasm;cytosol;cytoskeleton;cytoskeleton;actin cytoskeleton;cortical cytoskeleton;filamentous actin;
Reep4	OLIGO_07085				1.67								2.2					receptor accessory protein 4	CR553790			membrane;membrane;integral to membrane;
PAFAH1B3	OLIGO_10550				1.78								2.9					platelet-activating factor acetylhydrolase, isoform Ib, gamma subunit 29kDa	CR553886	1-alkyl-2-acetylglycerophosphocholine esterase activity;protein binding;protein binding;protein binding;hydrolase activity;hydro... <Preview truncated at 128 characters>	spermatogenesis;spermatogenesis;lipid catabolic process;	cytoplasm;cytoplasm;cytoplasm;cytoplasm;
Bt.33148	OLIGO_01182				-2.54	-1.59	1.51						-2.2						CR553920
KLF10	OLIGO_10356								1.69								2.3		CV798719	nucleic acid binding;protein binding;zinc ion binding;zinc ion binding;	bone mineralization;regulation of transcription;positive regulation of osteoclast differentiation;response to protein stimulus;g... <Preview truncated at 128 characters>	intracellular;intracellular;membrane fraction;cytosol;nucleus;membrane raft;membrane raft;cytosol;
Gvin1	OLIGO_05858							2.83	1.8							2.4	2		CV798732
Als2cr2	OLIGO_05840				1.67								2.2						CV798744
PRKACB	OLIGO_05881								-1.74				1.8					protein kinase, cAMP-dependent, catalytic, beta	CV798801	nucleotide binding;protein kinase activity;protein kinase activity;protein kinase activity;protein serine/threonine kinase activ... <Preview truncated at 128 characters>	mesoderm formation;protein amino acid phosphorylation;protein amino acid phosphorylation;protein amino acid phosphorylation;prot... <Preview truncated at 128 characters>	membrane fraction;nucleus;nucleus;nucleus;cytoplasm;cytoplasm;cytoplasm;mitochondrion;plasma membrane;neuromuscular junction;mem... <Preview truncated at 128 characters>
MX2	OLIGO_05879							2.8	2.76							3.4		myxovirus (influenza virus) resistance 2 (mouse)	CV798806	nucleotide binding;GTPase activity;GTPase activity;GTP binding;GTP binding;GTP binding;GTP binding;	response to virus;	cytoplasm;cytoplasm;
MAF	OLIGO_05865				-1.53		-1.62	-1.51	-2.95								-3.3	v-maf musculoaponeurotic fibrosarcoma oncogene homolog (avian)	CV798817	DNA binding;DNA binding;DNA binding;transcription factor activity;transcription factor activity;protein binding;sequence-specifi... <Preview truncated at 128 characters>	cytokine production;transcription;regulation of transcription, DNA-dependent;regulation of transcription, DNA-dependent;regulati... <Preview truncated at 128 characters>	nucleus;nucleus;nucleus;nucleus;cytoplasm;
XRCC1	OLIGO_03971				-1.92								-3.2			-2.2		X-ray repair complementing defective repair in Chinese hamster cells 1	DR697420	damaged DNA binding;protein binding;	single strand break repair;response to electrical stimulus;bleb assembly;response to protein stimulus;T cell proliferation;	nucleus;cell-cell junction;
NP	OLIGO_08946							1.95	4.24							2.1	3.4	nucleoside phosphorylase	DR697447	purine-nucleoside phosphorylase activity;	nucleobase, nucleoside, nucleotide and nucleic acid metabolic process;
Rftn1	OLIGO_10422				2.39								2.2						DR697497
Lrp8	OLIGO_06049								1.57								2.7	low density lipoprotein receptor-related protein 8, apolipoprotein e receptor	DR697650	receptor activity;calcium ion binding;calcium ion binding;		membrane;membrane;integral to membrane;
ZCCHC17	OLIGO_05163				1.58								3.4						DR697663	nucleic acid binding;RNA binding;zinc ion binding;
SH3PXD2A	OLIGO_05170				1.54								3.4						DR697668
RAP1A	OLIGO_03920				1.74			1.67					2.1					RAP1A, member of RAS oncogene family	DR697686	nucleotide binding;GTPase activity;GTPase activity;protein binding;protein binding;GTP binding;GTP binding;GTP binding;GTP bindi... <Preview truncated at 128 characters>	signal transduction;small GTPase mediated signal transduction;small GTPase mediated signal transduction;small GTPase mediated si... <Preview truncated at 128 characters>	intracellular;plasma membrane;plasma membrane;membrane;membrane;guanyl-nucleotide exchange factor complex;
PDPN	OLIGO_10437				2.04	1.54	1.96	2.26	3.05						4.1	4	5.6		DR749212
MIA	OLIGO_08266				-2.55								-3.4					melanoma inhibitory activity	DR749213	growth factor activity;		extracellular region;extracellular region;
OAS1	OLIGO_11698		-1.51				1.9	2.47	2.2						2.5	2.3	2.8	2,5-oligoadenylate synthetase 1, 40/46kDa	DR749237	RNA binding;RNA binding;ATP binding;ATP binding;transferase activity;transferase activity;nucleotidyltransferase activity;RNA bi... <Preview truncated at 128 characters>	immune response;immune response;immune response;immune response;immune response;immune response;
SSH1	OLIGO_11628							1.78	1.78								2.5	slingshot homolog 1 (Drosophila)	DR749329
DR749361	OLIGO_10867								1.92								2.7	Chloride intracellular channel 4	DR749361	ion channel activity;voltage-gated ion channel activity;voltage-gated chloride channel activity;chloride channel activity;	transport;ion transport;chloride transport;negative regulation of cell migration;cell differentiation;negative regulation of cel... <Preview truncated at 128 characters>	intracellular;soluble fraction;cytoplasm;cytoplasm;cytoplasm;mitochondrion;microvillus;membrane;membrane;membrane;integral to me... <Preview truncated at 128 characters>
Bt.6069	OLIGO_11737						1.66								2.6				DR749367
Bt.3606	OLIGO_10904							1.65	1.96								4.2		DR749437	Rab GTPase activator activity;	regulation of Rab GTPase activity;	intracellular;
PFKFB3	OLIGO_10833							1.81	2.71							2.7	4.7	6-phosphofructo-2-kinase/fructose-2,6-biphosphatase 3	DR749445	nucleotide binding;catalytic activity;catalytic activity;catalytic activity;6-phosphofructo-2-kinase activity;6-phosphofructo-2-... <Preview truncated at 128 characters>	fructose metabolic process;fructose 2,6-bisphosphate metabolic process;metabolic process;fructose metabolic process;fructose 2,6... <Preview truncated at 128 characters>
DR749446	OLIGO_09556				1.97								3					Transcribed locus	DR749446
ITGA2	OLIGO_10325						2.11	2.05	3.51						2.5	1.9	3.9	integrin, alpha 2 (CD49B, alpha 2 subunit of VLA-2 receptor)	L25886	receptor activity;identical protein binding;identical protein binding;collagen binding;collagen binding;integrin binding;collage... <Preview truncated at 128 characters>	cell adhesion;cell adhesion;integrin-mediated signaling pathway;cell-matrix adhesion;blood coagulation;organ morphogenesis;cell-... <Preview truncated at 128 characters>	integrin complex;external side of plasma membrane;membrane;membrane;integral to membrane;plasma membrane;plasma membrane;extrace... <Preview truncated at 128 characters>
CD5	OLIGO_11820				-1.64											-2.1		CD5 molecule	NM_173899	scavenger receptor activity;scavenger receptor activity;	induction of apoptosis by extracellular signals;T cell costimulation;	plasma membrane;external side of plasma membrane;membrane;membrane;membrane;membrane;membrane;integral to membrane;
Ager	OLIGO_11858			1.88								2.1						advanced glycosylation end product-specific receptor	NM_173982	protein binding;protein binding;receptor activity;protein binding;protein binding;receptor activity;protein binding;protein bind... <Preview truncated at 128 characters>	inflammatory response;regulation of inflammatory response;induction of positive chemotaxis;regulation of inflammatory response;i... <Preview truncated at 128 characters>	membrane;membrane;integral to membrane;
CCL8	OLIGO_11866					2.07	3.28	3.86	4.79					3.5	7.1	9.6	6.2	chemokine (C-C motif) ligand 8	NM_174007	cytokine activity;chemokine activity;chemokine activity;heparin binding;signal transducer activity;chemokine activity;	chemotaxis;inflammatory response;immune response;immune response;calcium ion transport;exocytosis;signal transduction;cell-cell ... <Preview truncated at 128 characters>	extracellular region;extracellular region;extracellular region;extracellular region;extracellular space;
TLR4	OLIGO_11941							2.33	2.71							3.9	5.7	toll-like receptor 4	NM_174198	lipopolysaccharide receptor activity;lipopolysaccharide receptor activity;receptor activity;transmembrane receptor activity;tran... <Preview truncated at 128 characters>	activation of innate immune response;production of nitric oxide involved in inflammatory response;inflammatory response;immune r... <Preview truncated at 128 characters>	cytoplasm;plasma membrane;integral to plasma membrane;external side of plasma membrane;membrane;membrane;integral to membrane;in... <Preview truncated at 128 characters>
CD79A	OLIGO_11979				-2.16				-2.18				-3.1			-2.2	-4.1	CD79a molecule, immunoglobulin-associated alpha	NM_174266	transmembrane receptor activity;protein binding;	cell surface receptor linked signaling pathway;B cell differentiation;B cell differentiation;B cell proliferation;B cell prolife... <Preview truncated at 128 characters>	multivesicular body;multivesicular body;plasma membrane;plasma membrane;external side of plasma membrane;external side of plasma... <Preview truncated at 128 characters>
HCBP6	OLIGO_12013				-2.12								-2.8						NM_174338
Chrna5	OLIGO_12088				1.64								2.1						NM_174514	receptor activity;nicotinic acetylcholine-activated cation-selective channel activity;ion channel activity;ion channel activity;... <Preview truncated at 128 characters>	transport;transport;ion transport;ion transport;ion transport;ion transport;ion transport;behavioral response to nicotine;	plasma membrane;plasma membrane;nicotinic acetylcholine-gated receptor-channel complex;membrane;membrane;membrane;integral to me... <Preview truncated at 128 characters>
EIF2AK2	OLIGO_12244							1.63								2			NM_178109	nucleotide binding;RNA binding;double-stranded RNA binding;translation initiation factor activity;protein kinase activity;protei... <Preview truncated at 128 characters>	translation;protein amino acid phosphorylation;protein amino acid phosphorylation;protein amino acid phosphorylation;protein ami... <Preview truncated at 128 characters>	intracellular;intracellular;
Bt.22978	OLIGO_12274				2.19			2.47	2.82				2.4			2.7	3.3		NM_181867		response to biotic stimulus;	integral to membrane;integral to membrane;
TFPI2	OLIGO_12276								2.38								4.9	tissue factor pathway inhibitor 2	NM_182788	serine-type endopeptidase inhibitor activity;serine-type endopeptidase inhibitor activity;peptidase inhibitor activity;peptidase... <Preview truncated at 128 characters>	blood coagulation;blood coagulation;	extracellular region;extracellular region;extracellular region;
Sod2	OLIGO_12287					1.55	3.64	8.02	13.29						3.9	7.6	10.4	superoxide dismutase 2, mitochondrial	NM_201527	superoxide dismutase activity;superoxide dismutase activity;superoxide dismutase activity;superoxide dismutase activity;superoxi... <Preview truncated at 128 characters>	age-dependent response to reactive oxygen species;regulation of transcription from RNA polymerase II promoter;superoxide metabol... <Preview truncated at 128 characters>	mitochondrion;mitochondrial matrix;
Ucp1	OLIGO_13250				-2.24	-1.79							-2.4	-1.8		-1.7		uncoupling protein 1 (mitochondrial, proton carrier)	X14064	binding;binding;binding;binding;binding;	transport;transport;mitochondrial transport;transmembrane transport;transport;transport;mitochondrial transport;transmembrane tr... <Preview truncated at 128 characters>	mitochondrion;mitochondrion;mitochondrial inner membrane;mitochondrial inner membrane;membrane;membrane;membrane;integral to mem... <Preview truncated at 128 characters>
