# Supplementary material for: Role of SPI-1 Secreted Effectors in Acute Bovine Response to Salmonella enterica Serovar Typhimurium: A Systems Biology Analysis Approach
Source: PLoS One. 2011 Nov 11;6(11):e26869. doi: 10.1371/journal.pone.0026869 (PMC3214023; doi:10.1371/journal.pone.0026869)
Supplement: Table S7 — Pathways associated with key mechanistic genes. Key mechanistic genes (determined by Bayesian z-score) from selected pathways identified by dynamic Bayesian Modeling. Pathways are based on Kyoto Encyclopedia of Genes and Genomes descriptions and pathway numbers. (XLSX) [file pone.0026869.s007.xlsx]

## Sheet: Supporting Table S7
S7 Supporting Table for Pathways
Name	Description	Category	Related_Pathways	Symbol_Count	Observed_Count	Probe_Count	t=15	t=30	t=60	t=120	t=240	t=480	Max_Score	Proteins
hsa00010	Glycolysis / Gluconeogenesis	Carbohydrate Metabolism	hsa00020,hsa00030,hsa00040,hsa00051,hsa00052,hsa00072,hsa00252,hsa00300,hsa00350,hsa00380,hsa00400,hsa00440,hsa00500,hsa00520,hsa00561,hsa00620,hsa00640,hsa00650,hsa00660,hsa00710,hsa00730,hsa00770	108	44	48	-2.57	1.42	2.79	2.16	3.59	0.04	3.59	2
hsa00020	Citrate cycle (TCA cycle)	Carbohydrate Metabolism	hsa00010,hsa00053,hsa00061,hsa00062,hsa00071,hsa00220,hsa00251,hsa00252,hsa00280,hsa00300,hsa00310,hsa00330,hsa00350,hsa00360,hsa00471,hsa00620,hsa00630,hsa00640,hsa00650	58	23	25	1.97	2.73	2.52	0.76	2.24	0	2.73	0
hsa00030	Pentose phosphate pathway	Carbohydrate Metabolism	hsa00010,hsa00040,hsa00230,hsa00240,hsa00340,hsa00400,hsa00680,hsa00750	80	19	20	1.03	-1.07	2.4	2.37	3.32	0	3.32	1
hsa00031	Inositol metabolism	Carbohydrate Metabolism	hsa00030	18	2	2	1.39	3.53	0	1.33	5.05	-2.04	5.05	0
hsa00040	Pentose and glucuronate interconversions	Carbohydrate Metabolism	hsa00010,hsa00030,hsa00052,hsa00053,hsa00500,hsa00520,hsa00562,hsa00740	125	8	8	3.25	-3.25	3.01	2.27	2.94	0	3.25	0
hsa00051	Fructose and mannose metabolism	Carbohydrate Metabolism	hsa00010,hsa00052,hsa00510,hsa00530	130	29	31	2.53	1.68	2.37	1.84	3.75	0	3.75	1
hsa00052	Galactose metabolism	Carbohydrate Metabolism	hsa00010,hsa00040,hsa00051,hsa00520	94	21	22	1.06	1.79	3.15	2.62	2.47	0	3.15	0
hsa00053	Ascorbate and aldarate metabolism	Carbohydrate Metabolism	hsa00020,hsa00040,hsa00051,hsa00520,hsa00630	95	9	9	1.31	1.66	-2.35	1.57	3.59	0	3.59	0
hsa00061	Fatty acid biosynthesis	Lipid Metabolism	hsa00020,hsa00071,hsa00410,hsa00620	66	5	6	1.73	2.84	2.81	0.04	-2.47	0	2.84	0
hsa00062	Fatty acid elongation in mitochondria	Lipid Metabolism	hsa00071	38	8	9	2.55	2.06	-2.91	4.21	1.76	0	4.21	0
hsa00071	Fatty acid metabolism	Lipid Metabolism	hsa00020,hsa00061,hsa00062,hsa00072,hsa00252,hsa00561	112	37	38	3.24	2.03	2.91	2.9	3.12	0	3.24	0
hsa00072	Synthesis and degradation of ketone bodies	Lipid Metabolism	hsa00010,hsa00071,hsa00100,hsa00620,hsa00650	16	7	8	1.8	-1.63	3.2	1.39	0.69	0	3.2	0
hsa00100	Biosynthesis of steroids	Lipid Metabolism	hsa00010,hsa00072,hsa00120,hsa00140,hsa00280,hsa00860,hsa00900	125	16	17	-1.47	1.04	1.29	0.78	1.89	0	1.89	0
hsa00120	Bile acid biosynthesis	Lipid Metabolism	hsa00100	92	23	24	2.78	1.96	2.47	1.23	3.31	0	3.31	0
hsa00130	Ubiquinone biosynthesis	Metabolism of Cofactors and Vitamins	hsa00400	64	7	7	4.07	3.18	3.72	-2.02	3.79	0.02	4.07	0
hsa00140	C21-Steroid hormone metabolism	Lipid Metabolism	hsa00100,hsa00150	59	8	8	-0.71	-1.87	0.23	0.39	2.21	0	2.21	0
hsa00150	Androgen and estrogen metabolism	Lipid Metabolism	hsa00140	112	24	25	1.56	-2.71	1.43	1.14	2.79	0	2.79	0
hsa00190	Oxidative phosphorylation	Energy Metabolism		156	102	112	3.92	3	3.67	2.62	3.38	0	3.92	6
hsa00220	Urea cycle and metabolism of amino groups	Amino Acid Metabolism	hsa00020,hsa00240,hsa00251,hsa00252,hsa00330,hsa00410,hsa00472,hsa00910,hsa00960	102	25	26	1.93	0.73	1.41	1.2	2.97	0	2.97	0
hsa00230	Purine metabolism	Nucleotide Metabolism	hsa00030,hsa00190,hsa00220,hsa00251,hsa00260,hsa00340,hsa00630,hsa00730,hsa00740,hsa00790	282	94	105	2.77	2.17	3.09	1.15	2.94	0	3.09	2
hsa00240	Pyrimidine metabolism	Nucleotide Metabolism	hsa00030,hsa00220,hsa00251,hsa00252,hsa00280,hsa00410	181	61	69	3.66	2.41	3.4	0.81	2.94	0.55	3.66	0
hsa00251	Glutamate metabolism	Amino Acid Metabolism	hsa00020,hsa00220,hsa00230,hsa00240,hsa00330,hsa00340,hsa00460,hsa00471,hsa00480,hsa00650,hsa00660,hsa00720,hsa00860,hsa00910	75	22	24	-1.99	-2.25	-3.49	2.36	3.07	0.02	-3.49	0
hsa00252	Alanine and aspartate metabolism	Amino Acid Metabolism	hsa00010,hsa00020,hsa00071,hsa00220,hsa00240,hsa00260,hsa00300,hsa00330,hsa00340,hsa00410,hsa00450,hsa00460,hsa00720,hsa00760,hsa00770	86	22	23	-1.95	1.1	2.57	1.94	2.65	0	2.65	0
hsa00260	Glycine, serine and threonine metabolism	Amino Acid Metabolism	hsa00230,hsa00252,hsa00271,hsa00272,hsa00290,hsa00300,hsa00460,hsa00564,hsa00600,hsa00620,hsa00630,hsa00680,hsa00860,hsa00920	131	27	28	2.37	1.12	3.66	0.96	2.69	0.77	3.66	0
hsa00271	Methionine metabolism	Amino Acid Metabolism	hsa00260,hsa00272,hsa00920	75	12	14	-4.17	2.28	2.19	2.49	3.41	0	-4.17	1
hsa00272	Cysteine metabolism	Amino Acid Metabolism	hsa00260,hsa00271,hsa00430,hsa00480,hsa00770	57	11	11	-1.9	2.17	3.16	1.79	2.4	-0.5	3.16	1
hsa00280	Valine, leucine and isoleucine degradation	Amino Acid Metabolism	hsa00020,hsa00100,hsa00240,hsa00290,hsa00640	94	37	39	1.98	3.29	-2.89	2.31	3.17	0	3.29	0
hsa00281	Geraniol degradation	Xenobiotics Biodegradation and Metabolism	hsa00280	35	4	5	4.02	4.28	-2.34	-2.92	-1.88	-1.42	4.28	0
hsa00290	Valine, leucine and isoleucine biosynthesis	Amino Acid Metabolism	hsa00260,hsa00280,hsa00620	52	10	11	4.76	2.64	2.59	3.24	3.08	-0.87	4.76	0
hsa00300	Lysine biosynthesis	Amino Acid Metabolism	hsa00010,hsa00020,hsa00252,hsa00260,hsa00310,hsa00550,hsa00620,hsa00960	65	3	3	0.57	2.19	1.95	-2.47	2.45	0	-2.47	0
hsa00310	Lysine degradation	Amino Acid Metabolism	hsa00020,hsa00300,hsa00780	123	25	25	2.21	1.79	2.54	-1.7	2.79	0	2.79	0
hsa00330	Arginine and proline metabolism	Amino Acid Metabolism	hsa00020,hsa00220,hsa00252,hsa00472	117	27	28	3.62	2.05	-3.46	2.05	3.84	-0.65	3.84	1
hsa00340	Histidine metabolism	Amino Acid Metabolism	hsa00030,hsa00230,hsa00251,hsa00252	111	32	32	2.02	2.46	1.85	1.22	3.08	0	3.08	0
hsa00350	Tyrosine metabolism	Amino Acid Metabolism	hsa00020,hsa00400,hsa00620,hsa00950	188	44	47	2.56	-2.17	2.53	1.21	3.28	0	3.28	0
hsa00351	1,1,1-Trichloro-2,2-bis(4-chlorophenyl)ethane (DDT) degradation	Xenobiotics Biodegradation and Metabolism		31	1	1	0	0	0	0	0	0	0	0
hsa00360	Phenylalanine metabolism	Amino Acid Metabolism	hsa00010,hsa00020,hsa00350,hsa00400,hsa00620,hsa00632,hsa00960	105	22	24	3.25	-1.68	2.41	0.89	3.35	-0.16	3.35	1
hsa00361	gamma-Hexachlorocyclohexane degradation	Xenobiotics Biodegradation and Metabolism	hsa00020,hsa00627,hsa00630	82	14	17	2.99	-1.84	3.57	2.06	2.89	0	3.57	0
hsa00362	Benzoate degradation via hydroxylation	Xenobiotics Biodegradation and Metabolism		93	3	3	0.22	1.42	-1.8	3.17	2.29	0	3.17	0
hsa00363	Bisphenol A degradation	Xenobiotics Biodegradation and Metabolism	hsa00361	41	7	8	2.68	-0.85	3.61	1.38	-2.43	0	3.61	0
hsa00364	Fluorobenzoate degradation	Xenobiotics Biodegradation and Metabolism		31	1	1	-2.02	0.67	-3.32	0.46	-2.19	0	-3.32	0
hsa00380	Tryptophan metabolism	Amino Acid Metabolism	hsa00010,hsa00400,hsa00760	170	40	41	2.13	2.01	1.77	1.14	2.54	0	2.54	0
hsa00400	Phenylalanine, tyrosine and tryptophan biosynthesis	Amino Acid Metabolism	hsa00010,hsa00030,hsa00130,hsa00350,hsa00360,hsa00380,hsa00710,hsa00790,hsa00940,hsa00950,hsa00960	62	7	7	-2.68	1.92	2.97	1.03	3.13	-1.09	3.13	0
hsa00401	Novobiocin biosynthesis	Biosynthesis of Secondary Metabolites	hsa00330,hsa00400	73	3	3	-1.93	2.33	2.82	1.15	2.18	-1.35	2.82	0
hsa00410	beta-Alanine metabolism	Metabolism of Other Amino Acids	hsa00061,hsa00240,hsa00252,hsa00330,hsa00460,hsa00640,hsa00770	73	17	17	1.9	2.1	1.35	-0.85	2.68	0	2.68	0
hsa00430	Taurine and hypotaurine metabolism	Metabolism of Other Amino Acids	hsa00272,hsa00460,hsa00480,hsa00620,hsa00920	38	3	3	1.06	-1.35	1.8	1.7	1.19	0	1.8	0
hsa00440	Aminophosphonate metabolism	Metabolism of Other Amino Acids	hsa00010	55	9	9	2.5	2.79	1.93	2.14	2.63	-0.08	2.79	0
hsa00450	Selenoamino acid metabolism	Metabolism of Other Amino Acids	hsa00252,hsa00460,hsa00472	70	18	18	2.97	2.81	2.74	2.38	2.58	0	2.97	0
hsa00460	Cyanoamino acid metabolism	Metabolism of Other Amino Acids	hsa00251,hsa00252,hsa00260,hsa00410,hsa00430,hsa00450,hsa00471,hsa00472,hsa00480	52	4	4	1.02	0.29	0	1.11	2.08	0	2.08	0
hsa00471	D-Glutamine and D-glutamate metabolism	Metabolism of Other Amino Acids	hsa00020,hsa00251,hsa00460,hsa00530,hsa00550	26	2	3	4.1	-2.14	2.33	1.12	-2.7	-1.15	4.1	0
hsa00480	Glutathione metabolism	Metabolism of Other Amino Acids	hsa00220,hsa00251,hsa00272,hsa00430,hsa00460	76	26	27	2.19	-1.67	2.94	2.14	2.52	-0.48	2.94	1
hsa00500	Starch and sucrose metabolism	Carbohydrate Metabolism	hsa00010,hsa00040,hsa00053,hsa00830	181	40	41	3.21	2.89	3.31	3.02	3.77	-0.67	3.77	0
hsa00510	N-Glycan biosynthesis	Glycan Biosynthesis and Metabolism	hsa00051,hsa00511,hsa00533,hsa00563,hsa00900	89	32	36	-3.06	2.72	2.04	1.7	2.94	0	-3.06	0
hsa00511	N-Glycan degradation	Glycan Biosynthesis and Metabolism		16	9	10	3.17	2.72	2.23	1.25	3.6	0	3.6	0
hsa00512	O-Glycan biosynthesis	Glycan Biosynthesis and Metabolism	hsa00533	49	13	16	2.88	1.6	2.93	1.05	3.32	0.01	3.32	0
hsa00520	Nucleotide sugars metabolism	Carbohydrate Metabolism	hsa00010,hsa00040,hsa00052,hsa00053,hsa00521	72	5	5	3.75	2.48	3.04	2.48	-2.66	0	3.75	0
hsa00521	Streptomycin biosynthesis	Biosynthesis of Secondary Metabolites	hsa00520	39	9	9	-0.58	1.72	1.72	1.14	1.56	0.84	1.72	0
hsa00530	Aminosugars metabolism	Carbohydrate Metabolism	hsa00051,hsa00471,hsa00531,hsa00550	83	20	20	3.57	2.63	3.05	2.62	3.62	0.73	3.62	0
hsa00531	Glycosaminoglycan degradation	Glycan Biosynthesis and Metabolism	hsa00532,hsa00533,hsa00534	44	11	12	1.87	1.84	0.79	1.44	3.36	0.96	3.36	0
hsa00532	Chondroitin sulfate biosynthesis	Glycan Biosynthesis and Metabolism	hsa00531,hsa00534	32	12	12	3.48	2.7	2.48	2.15	2.98	0	3.48	0
hsa00533	Keratan sulfate biosynthesis	Glycan Biosynthesis and Metabolism	hsa00510,hsa00512	16	11	12	-0.25	1.17	-0.9	1.3	2.05	0	2.05	0
hsa00534	Heparan sulfate biosynthesis	Glycan Biosynthesis and Metabolism	hsa00531,hsa00532	27	9	9	3.92	1.56	2.26	1.01	3.25	0	3.92	0
hsa00550	Peptidoglycan biosynthesis	Glycan Biosynthesis and Metabolism	hsa00471,hsa00530	57	3	3	-1.69	-0.75	-2.85	2	4.34	0	4.34	0
hsa00561	Glycerolipid metabolism	Lipid Metabolism	hsa00010,hsa00071,hsa00564	103	35	38	1.35	1.76	2.18	0.6	2.15	0	2.18	0
hsa00562	Inositol phosphate metabolism	Carbohydrate Metabolism	hsa00040,hsa00564	93	31	31	3.56	2.59	-2.69	1.71	3.37	0.04	3.56	0
hsa00563	Glycosylphosphatidylinositol(GPI)-anchor biosynthesis	Glycan Biosynthesis and Metabolism	hsa00510,hsa00564	37	12	13	2.05	2.73	1.25	1.1	3.02	0	3.02	0
hsa00564	Glycerophospholipid metabolism	Lipid Metabolism	hsa00010,hsa00260,hsa00561,hsa00562,hsa00563,hsa00565,hsa00620	134	36	40	2.53	1.96	1.97	2	2.36	0.21	2.53	0
hsa00565	Ether lipid metabolism	Lipid Metabolism	hsa00564	73	19	21	1.95	2.93	2.3	1.67	3.14	0.83	3.14	0
hsa00590	Arachidonic acid metabolism	Lipid Metabolism	hsa00591	138	29	31	3.04	-2.57	-2.76	1.5	3.44	0.17	3.44	0
hsa00591	Linoleic acid metabolism	Lipid Metabolism	hsa00590	64	14	15	0.57	-0.78	1.56	0.44	2.37	0	2.37	0
hsa00592	alpha-Linolenic acid metabolism	Lipid Metabolism		68	9	11	3.5	2.73	2.04	1.49	2.17	0	3.5	0
hsa00600	Sphingolipid metabolism	Lipid Metabolism	hsa00260,hsa00601,hsa00602,hsa00603,hsa00604	74	22	24	3.23	2.24	3.69	1.88	3.69	1.2	3.69	0
hsa00601	Glycosphingolipid biosynthesis - lactoseries	Glycan Biosynthesis and Metabolism	hsa00600	24	7	7	1.14	0.57	0.34	0	-2.1	0	-2.1	0
hsa00602	Glycosphingolipid biosynthesis - neo-lactoseries	Glycan Biosynthesis and Metabolism	hsa00600	69	14	14	1.97	-0.59	-0.55	0.22	-1.65	0.28	1.97	0
hsa00603	Glycosphingolipid biosynthesis - globoseries	Glycan Biosynthesis and Metabolism	hsa00600	33	10	10	2.61	0	-1.71	1.37	-2.42	0	2.61	0
hsa00604	Glycosphingolipid biosynthesis - ganglioseries	Glycan Biosynthesis and Metabolism	hsa00600	50	11	13	1.15	1.06	-1.04	0.8	1.47	0	1.47	0
hsa00620	Pyruvate metabolism	Carbohydrate Metabolism	hsa00010,hsa00020,hsa00061,hsa00072,hsa00260,hsa00290,hsa00300,hsa00630,hsa00640,hsa00650,hsa00660,hsa00760	119	32	34	-1.59	1.16	1.98	0.82	2.16	0	2.16	1
hsa00623	2,4-Dichlorobenzoate degradation	Xenobiotics Biodegradation and Metabolism		65	2	3	-1.17	-3.13	0.47	0	1.69	0	-3.13	1
hsa00624	1- and 2-Methylnaphthalene degradation	Xenobiotics Biodegradation and Metabolism		83	15	19	3.45	-2.18	2.24	1.57	3.07	0	3.45	0
hsa00625	Tetrachloroethene degradation	Xenobiotics Biodegradation and Metabolism	hsa00620,hsa00630	23	3	3	2.01	-1.13	3.19	0	-2.38	0	3.19	0
hsa00626	Nitrobenzene degradation	Infectious Diseases	hsa00350,hsa00361,hsa00380,hsa00620	71	5	5	1.84	1.86	1.91	0.16	2.65	-1.08	2.65	0
hsa00627	1,4-Dichlorobenzene degradation	Xenobiotics Biodegradation and Metabolism	hsa00010,hsa00361,hsa00620,hsa00630	70	1	1	-2.02	0.67	-3.32	0.46	-2.19	0	-3.32	0
hsa00628	Fluorene degradation	Xenobiotics Biodegradation and Metabolism		52	3	3	1.25	0	0	0	1.42	0	1.42	0
hsa00630	Glyoxylate and dicarboxylate metabolism	Carbohydrate Metabolism	hsa00020,hsa00053,hsa00230,hsa00260,hsa00620,hsa00710,hsa00750,hsa00910	105	10	10	1.32	1.79	2.85	1.08	-1.26	0	2.85	0
hsa00632	Benzoate degradation via CoA ligation	Xenobiotics Biodegradation and Metabolism	hsa00360,hsa00620,hsa00650	123	17	20	2.7	1.21	2.51	1.58	2.13	0	2.7	0
hsa00640	Propanoate metabolism	Carbohydrate Metabolism	hsa00010,hsa00020,hsa00280,hsa00410,hsa00620,hsa00641,hsa00660,hsa00770	95	22	22	2.95	3.86	3	2.1	2.97	0	3.86	1
hsa00641	3-Chloroacrylic acid degradation	Xenobiotics Biodegradation and Metabolism	hsa00620	27	11	11	-1.27	-1.05	-1.05	0.41	3.28	0	3.28	0
hsa00642	Ethylbenzene degradation	Xenobiotics Biodegradation and Metabolism		39	6	9	-3.67	1.13	-1.58	1.59	-2.21	0	-3.67	0
hsa00643	Styrene degradation	Xenobiotics Biodegradation and Metabolism	hsa00010,hsa00020,hsa00620,hsa00640	48	3	3	0	-1.34	3.82	1.15	1.89	0	3.82	0
hsa00650	Butanoate metabolism	Carbohydrate Metabolism	hsa00010,hsa00020,hsa00072,hsa00251,hsa00620,hsa00750	109	24	27	2.73	1.96	-2.63	1.89	2.07	0	2.73	0
hsa00660	C5-Branched dibasic acid metabolism	C5-Branched dibasic acid metabolism	hsa00010,hsa00251,hsa00290,hsa00620,hsa00640,hsa00760	49	1	1	-0.35	1.73	1.43	0	0.31	0	1.73	0
hsa00670	One carbon pool by folate	Metabolism of Cofactors and Vitamins	hsa00790	32	12	12	1.75	-2.02	2.78	2.71	0.88	0	2.78	0
hsa00680	Methane metabolism	Energy Metabolism	hsa00030,hsa00260,hsa00910,hsa00920	66	6	6	-3.49	0	1.11	2.05	2.45	0	-3.49	1
hsa00710	Carbon fixation	Carbon fixation	hsa00010,hsa00400,hsa00630,hsa00720	59	15	17	1.28	1.37	2.35	2.23	3.48	-0.23	3.48	1
hsa00720	Reductive carboxylate cycle (CO2 fixation)	Energy Metabolism	hsa00251,hsa00252,hsa00710,hsa00920	33	10	11	0.71	2.3	-2.42	0.36	1.35	0	-2.42	0
hsa00730	Thiamine metabolism	Metabolism of Cofactors and Vitamins	hsa00010,hsa00100,hsa00230,hsa00260,hsa00272,hsa00400	51	5	5	1.8	1.19	-1.14	2.12	3.33	0	3.33	0
hsa00740	Riboflavin metabolism	Metabolism of Cofactors and Vitamins	hsa00030,hsa00040,hsa00230	46	11	12	2.27	-2.65	1.95	1.93	3.99	-0.87	3.99	0
hsa00750	Vitamin B6 metabolism	Metabolism of Cofactors and Vitamins	hsa00010,hsa00030,hsa00630,hsa00650	58	3	4	-1.14	1.54	1.05	0	-2.23	0	-2.23	0
hsa00760	Nicotinate and nicotinamide metabolism	Metabolism of Cofactors and Vitamins	hsa00252,hsa00380,hsa00620,hsa00660,hsa00960	102	13	17	-3.82	2.37	3.52	-1.58	3.9	-1.25	3.9	0
hsa00770	Pantothenate and CoA biosynthesis	Metabolism of Cofactors and Vitamins	hsa00010,hsa00252,hsa00272,hsa00410,hsa00640	57	10	10	3.75	3.03	2.59	0.54	3.07	-0.95	3.75	0
hsa00780	Biotin metabolism	Metabolism of Cofactors and Vitamins	hsa00310,hsa00960	21	3	3	0.23	-1.39	2.7	0.12	-0.66	0	2.7	0
hsa00785	Lipoic acid metabolism	Metabolism of Cofactors and Vitamins	hsa00061	10	2	2	0.29	-0.38	0.7	0	0.82	0	0.82	0
hsa00790	Folate biosynthesis	Metabolism of Cofactors and Vitamins	hsa00230,hsa00400,hsa00670	95	28	32	-2.8	1.86	3.2	2.07	3.59	0	3.59	0
hsa00791	Atrazine degradation	Xenobiotics Biodegradation and Metabolism	hsa00790	41	2	2	2.83	0.41	-0.88	-1.64	4.06	0	4.06	0
hsa00830	Retinol metabolism	Metabolism of Cofactors and Vitamins		29	2	2	-0.12	0	-1.08	0.03	0	0	-1.08	0
hsa00860	Porphyrin and chlorophyll metabolism	Metabolism of Cofactors and Vitamins	hsa00251,hsa00260	200	23	25	-2.56	-3.14	-5.25	2.48	3.62	0.69	-5.25	1
hsa00900	Terpenoid biosynthesis	Biosynthesis of Secondary Metabolites	hsa00100,hsa00510,hsa00902	53	6	6	-1.15	0.14	1.57	2.52	2.4	0	2.52	0
hsa00902	Monoterpenoid biosynthesis	Biosynthesis of Secondary Metabolites	hsa00900,hsa00903	40	1	1	0.35	0.37	0.54	0	2.81	-0.89	2.81	0
hsa00903	Limonene and pinene degradation	Biosynthesis of Secondary Metabolites	hsa00902	102	16	19	2.55	0.66	-1.44	2.02	2.01	0	2.55	0
hsa00910	Nitrogen metabolism	Energy Metabolism	hsa00220,hsa00251,hsa00630,hsa00680	101	19	21	1.5	0.46	1.1	0.69	2.21	0.18	2.21	0
hsa00920	Sulfur metabolism	Energy Metabolism	hsa00260,hsa00271,hsa00680,hsa00720	55	8	8	0.44	-2.81	1.57	0.77	-0.92	1.34	-2.81	0
hsa00930	Caprolactam degradation	Xenobiotics Biodegradation and Metabolism		54	7	7	3.9	3.58	-4.12	-5.71	4.67	-0.18	-5.71	0
hsa00940	Stilbene, coumarine and lignin biosynthesis	Infectious Diseases	hsa00400	70	8	8	0.62	0	-0.5	0	2.3	0	2.3	1
hsa00950	Alkaloid biosynthesis I	Biosynthesis of Secondary Metabolites	hsa00350,hsa00400	104	12	12	2.01	1.4	1.57	0.85	1.36	0	2.01	0
hsa00960	Alkaloid biosynthesis II	Biosynthesis of Secondary Metabolites	hsa00300,hsa00330,hsa00360,hsa00400,hsa00760,hsa00780	65	9	13	-4.04	-2.89	1.15	0.55	2.41	0	-4.04	1
hsa00970	Aminoacyl-tRNA biosynthesis	Translation	hsa00251,hsa00252,hsa00260,hsa00271,hsa00272,hsa00290,hsa00300,hsa00330,hsa00340,hsa00380,hsa00400	101	29	29	-4.85	-3.18	3.85	2.87	3.84	1.58	-4.85	0
hsa00980	Metabolism of xenobiotics by cytochrome P450	Xenobiotics Biodegradation and Metabolism		152	32	34	-2.47	-1.47	3.12	1.41	2.78	0	3.12	1
hsa01030	Glycan structures - biosynthesis 1	Glycan Biosynthesis and Metabolism	hsa00510,hsa00512,hsa00532,hsa00533,hsa00534	124	61	69	2.97	2.27	2.61	1.49	3.36	0	3.36	0
hsa01031	Glycan structures - biosynthesis 2	Glycan Biosynthesis and Metabolism	hsa00563,hsa00601,hsa00602,hsa00603,hsa00604	70	35	36	1.99	1.4	1.49	0.53	2.5	0	2.5	0
hsa01032	Glycan structures - degradation	Glycan Biosynthesis and Metabolism	hsa00511,hsa00531	35	18	19	3.01	2.49	1.69	2.08	4.29	-0.16	4.29	0
hsa01040	Biosynthesis of unsaturated fatty acids	Lipid Metabolism		102	17	21	-3.72	-3.22	3.29	3.32	3.11	-0.48	-3.72	0
hsa01430	Cell Communication	Infectious Diseases	hsa04010,hsa04020,hsa04060,hsa04070,hsa04080,hsa04110,hsa04210,hsa04310,hsa04350,hsa04510,hsa04512,hsa04520,hsa04530,hsa04540,hsa04810	135	59	64	1.91	2.42	1.83	1.3	3.64	1.14	3.64	9
hsa01510	Neurodegenerative Diseases	Neurodegenerative Diseases	hsa05010,hsa05020,hsa05030,hsa05040,hsa05050,hsa05060	35	26	31	2.2	0.78	3.37	2.23	2.5	0	3.37	1
hsa02010	ABC transporters	Membrane Transport		266	25	27	3.92	2.68	2.54	1.22	3.27	0	3.92	0
hsa03010	Ribosome	Translation		167	34	36	-4.37	2.52	4.18	3.27	4.17	0	-4.37	5
hsa03020	RNA polymerase	Transcription		46	19	20	1.8	1.78	3.35	0.25	2.79	0.18	3.35	0
hsa03022	Basal transcription factors	Transcription		30	2	2	1.63	2.77	-2.05	0	1.72	0	2.77	0
hsa03030	DNA polymerase	Replication and Repair		45	16	16	3.6	-2.67	2.03	1.23	2.63	-0.11	3.6	0
hsa03050	Proteasome	Folding, Sorting and Degradation		32	21	21	-3.91	2.16	-4.73	2.73	3.62	0	-4.73	0
hsa03060	Protein export	Folding, Sorting and Degradation		23	7	8	2.43	2	-1.51	2.63	3.1	0.52	3.1	0
hsa03320	PPAR signaling pathway	Endocrine System	hsa00071,hsa00072,hsa00120,hsa00564,hsa04920	73	40	47	-2.79	1.69	2.42	1.43	2.5	0.6	-2.79	1
hsa04010	MAPK signaling pathway	Signal Transduction	hsa04070,hsa04110,hsa04115,hsa04210,hsa04310	251	171	200	3.33	2.3	3.2	2.12	3.34	0.86	3.34	5
hsa04012	ErbB signaling pathway	Signal Transduction	hsa04010,hsa04020,hsa04110,hsa04150,hsa05212,hsa05213,hsa05214,hsa05223	91	62	73	3.17	2.52	2.98	1.69	3.57	0.1	3.57	0
hsa04020	Calcium signaling pathway	Signal Transduction	hsa04010,hsa04070,hsa04210,hsa04720,hsa04730	204	109	124	3.59	3.21	3.42	2.01	3.58	0	3.59	1
hsa04060	Cytokine-cytokine receptor interaction	Signaling Molecules and Interaction		262	137	156	1.68	1.27	1.72	0.49	2.82	1.52	2.82	0
hsa04070	Phosphatidylinositol signaling system	Signal Transduction		101	50	61	4.05	3.08	2.77	1.84	3.24	0	4.05	0
hsa04080	Neuroactive ligand-receptor interaction	Signaling Molecules and Interaction		354	117	127	1.95	1.82	2.15	0.52	3.18	0	3.18	0
hsa04110	Cell cycle	Cell Growth and Death	hsa04010,hsa04120,hsa04210	111	87	93	3.09	2.93	3.75	1.66	2.95	0.17	3.75	0
hsa04120	Ubiquitin mediated proteolysis	Folding, Sorting and Degradation	hsa03050	49	37	40	2.87	2.96	3.37	1.99	2.76	1.44	3.37	0
hsa04130	microtubule-associated protein 1A	Folding, Sorting and Degradation		40	16	18	3.55	1.54	-2.9	2.4	3.29	-1.51	3.55	0
hsa04140	Regulation of autophagy	Folding, Sorting and Degradation	hsa01510,hsa04010,hsa04130,hsa04150,hsa04210,hsa04612,hsa04910	43	9	9	-2.44	2.25	-3.04	1.24	2.6	2.85	-3.04	0
hsa04150	mTOR signaling pathway	Signal Transduction	hsa04010,hsa04140,hsa04370,hsa04910	57	31	39	-4.04	3.42	3.51	2.25	4.27	1.09	4.27	1
hsa04210	Apoptosis	Cell Growth and Death	hsa04060,hsa04110,hsa04115	102	65	73	3.61	-2.79	3.94	2.03	3.87	0.84	3.94	1
hsa04310	Wnt signaling pathway	Signal Transduction	hsa04010,hsa04110,hsa04115,hsa04120,hsa04350,hsa04510,hsa04520,hsa05010	150	104	121	3.16	3.32	3.08	1.85	3.31	0	3.32	0
hsa04320	Dorso-ventral axis formation	Development		38	12	14	3.58	1.27	1.4	1.06	3.26	0	3.58	0
hsa04330	Notch signaling pathway	Signal Transduction	hsa04010	45	27	29	2.67	2.57	1.69	1.9	2.18	0.67	2.67	1
hsa04340	Hedgehog signaling pathway	Signal Transduction	hsa04310,hsa04340,hsa04350	56	26	31	2.55	2.43	1.38	1.11	2.06	0.08	2.55	0
hsa04350	TGF-beta signaling pathway	Signal Transduction	hsa04010,hsa04110,hsa04120,hsa04210	82	54	67	3.08	2.91	3.54	1.75	3.83	2.49	3.83	0
hsa04360	Axon guidance	Development	hsa04010,hsa04060,hsa04810	136	90	102	3.3	2.52	3.31	2.19	3.14	0.02	3.31	1
hsa04370	VEGF signaling pathway	Signal Transduction	hsa00590,hsa04010,hsa04020,hsa04210,hsa04510	79	54	62	2.54	2.57	3.44	2.35	3.28	0	3.44	1
hsa04510	Integrin-mediated cell adhesion	Cell Communication	hsa04010,hsa04060,hsa04070,hsa04110,hsa04210,hsa04310,hsa04512,hsa04810	82	65	77	4	2.45	4.02	2.48	3.72	0	4.02	0
hsa04512	ECM-receptor interaction	Signaling Molecules and Interaction	hsa04510	89	56	62	1.99	2.17	2.09	1.6	3.47	1.23	3.47	5
hsa04514	Cell adhesion molecules (CAMs)	Signaling Molecules and Interaction	hsa04520,hsa04530,hsa04610,hsa04660,hsa04670	134	74	82	1.22	1.58	1.91	1.49	3.21	0.28	3.21	1
hsa04520	Adherens junction	Cell Communication	hsa04010,hsa04060,hsa04310,hsa04350,hsa04530,hsa04810	79	64	81	3.52	2.53	3.41	2.48	3.4	0.5	3.52	3
hsa04530	Tight junction	Cell Communication	hsa04070,hsa04520,hsa04810	110	78	91	3.53	2.44	3.8	2.31	3.81	0.97	3.81	4
hsa04540	Gap junction	Cell Communication	hsa04010,hsa04020,hsa04060,hsa04070,hsa04080	106	60	70	3.57	2.48	3.2	2.08	2.82	0	3.57	1
hsa04610	Complement and coagulation cascades	Immune System	hsa04662	72	46	51	1.44	1.63	1.7	0	2.93	1.45	2.93	6
hsa04612	Antigen processing and presentation	Immune System	hsa03050,hsa04650,hsa04660	88	36	39	2.55	1.88	2.67	1.84	3.05	0	3.05	1
hsa04614	Renin-angiotensin system	Endocrine System	hsa04610	24	7	7	0	1.21	0.58	0	1.81	-0.69	1.81	0
hsa04620	Toll-like receptor signaling pathway	Immune System	hsa04010,hsa04060,hsa04120,hsa04210,hsa04610,hsa04630	99	67	79	2.39	-2.22	3.03	1.04	2.92	0.84	3.03	0
hsa04630	Jak-STAT signaling pathway	Signal Transduction	hsa04010,hsa04060,hsa04110,hsa04120,hsa04210	153	98	112	2.51	2	2.92	0.98	3.16	1.41	3.16	0
hsa04640	Hematopoietic cell lineage	Immune System		91	58	70	2.04	1.92	2.57	0.88	3	0.87	3	0
hsa04650	Natural killer cell mediated cytotoxicity	Immune System	hsa04010,hsa04020,hsa04060,hsa04210,hsa04630	127	69	79	2.39	2.62	3.14	1.9	3.79	1.41	3.79	0
hsa04660	T cell receptor signaling pathway	Immune System	hsa04010,hsa04120,hsa04514,hsa04810	102	80	89	2.59	2.67	3.22	2.1	3.24	0.86	3.24	0
hsa04662	B cell receptor signaling pathway	Immune System	hsa04010,hsa04120,hsa04610,hsa04810	73	53	64	2.91	3.08	3.44	2.83	3.74	0.3	3.74	0
hsa04664	Fc epsilon RI signaling pathway	Immune System	hsa00590,hsa04010,hsa04070	86	55	66	2.23	2.12	3.03	1.56	3.01	0	3.03	0
hsa04670	Leukocyte transendothelial migration	Immune System	hsa04514,hsa04810	124	86	97	2.94	2	2.68	1.95	3.39	0.34	3.39	5
hsa04710	Circadian rhythm	Behavior		16	9	12	2.05	0	2.55	0.7	2.34	1.88	2.55	0
hsa04720	Long-term potentiation	Nervous System	hsa04010,hsa04020,hsa04080	74	47	54	3.81	3.43	3.71	2.53	3.51	0	3.81	1
hsa04730	Long-term depression	Nervous System	hsa04020,hsa04080	88	48	54	2.42	2.36	2.42	1.7	3.19	0	3.19	0
hsa04740	Olfactory transduction	Sensory System		37	14	17	4.03	4.19	3.22	2.01	3.82	0	4.19	0
hsa04742	Taste transduction	Sensory System	hsa04020	65	13	13	1.58	1.64	3.82	2.11	2.3	0	3.82	0
hsa04810	Regulation of actin cytoskeleton	Cell Motility	hsa04010,hsa04510,hsa04520	215	145	164	3.73	2.45	3.42	2.63	3.98	0.72	3.98	8
hsa04910	Insulin signaling pathway	Endocrine System	hsa00010,hsa00061,hsa00500,hsa04010,hsa04070,hsa04210	145	96	117	3.33	2.82	3.4	2.15	3.64	0	3.64	0
hsa04912	GnRH signaling pathway	Endocrine System	hsa04010,hsa04020,hsa04060,hsa04080	102	71	79	2.58	2.94	3.26	2.06	3.04	0	3.26	0
hsa04916	Melanogenesis	Endocrine System	hsa00350,hsa04010,hsa04310,hsa05218	108	68	79	3.48	3.18	3.4	1.65	3.52	0	3.52	0
hsa04920	Adipocytokine signaling pathway	Endocrine System		74	50	60	2.75	1.19	2.86	1.55	2.88	0.37	2.88	0
hsa04930	Type II diabetes mellitus	Metabolic Disorders	hsa04110,hsa04210,hsa04810,hsa04910,hsa04920,hsa04950	47	30	37	2.05	1.94	2.78	2	3.02	0	3.02	0
hsa04940	Type I diabetes mellitus	Metabolic Disorders	hsa04210,hsa04660	47	24	25	1.68	1.66	-1.95	0.51	3.09	2	3.09	1
hsa04950	Maturity onset diabetes of the young	Metabolic Disorders	hsa04910,hsa04930	25	9	10	2.63	0	-2.33	1.87	3.44	0	3.44	0
hsa05010	Alzheimer's disease	Neurodegenerative Diseases	hsa04110,hsa04210,hsa04610,hsa05020	23	17	19	1.19	1.23	1.26	0.94	1.77	0	1.77	1
hsa05020	Parkinson's disease	Neurodegenerative Diseases	hsa04210	17	15	17	-0.95	1.94	2.52	1.62	-1.26	0	2.52	0
hsa05030	Amyotrophic lateral sclerosis (ALS)	Neurodegenerative Diseases	hsa04210	17	14	15	3.33	1.23	3.42	2.97	-2.97	0	3.42	0
hsa05040	Huntington's disease	Neurodegenerative Diseases	hsa04210	28	21	22	3.53	3.23	2.57	3.11	3.91	0.42	3.91	1
hsa05050	Dentatorubropallidoluysian atrophy (DRPLA)	Neurodegenerative Diseases	hsa04210	15	9	11	3.43	0.89	2.69	3.03	2.1	1.14	3.43	1
hsa05060	Prion disease	Neurodegenerative Diseases		11	9	10	2.06	0	3.9	0.95	-2.3	0	3.9	1
hsa05110	Cholera	Infectious Diseases		52	14	16	-1.85	-2.66	-0.54	2.53	2.12	0.42	-2.66	1
hsa05120	Epithelial cell signaling in Helicobacter pylori infection	Infectious Diseases	hsa04010,hsa04210,hsa04530	126	32	39	2.19	2.1	2.17	1.41	2.85	1.75	2.85	0
hsa05130	Pathogenic Escherichia coli infection	Infectious Diseases	hsa04210,hsa04520,hsa04530,hsa04620,hsa04810	52	32	39	2.89	1.86	3.85	2.03	3.17	1.4	3.85	5
hsa05131	Pathogenic Escherichia coli infection	Infectious Diseases	hsa04210,hsa04520,hsa04530,hsa04620,hsa04810	55	26	33	3.15	2.39	3.95	2.17	3.33	2.39	3.95	5
hsa05210	Colorectal cancer	Cancers	hsa04010,hsa04110,hsa04115,hsa04210,hsa04310,hsa04350	76	57	72	3.14	2.87	3.69	2.52	3.53	0	3.69	0
hsa05211	Renal cell carcinoma	Cancers	hsa00020,hsa04010,hsa04120,hsa04350,hsa04370	72	47	60	3.71	2.99	3.77	2.57	4	1.66	4	0
hsa05212	Pancreatic cancer	Cancers	hsa04010,hsa04012,hsa04110,hsa04115,hsa04210,hsa04350,hsa04370,hsa04630	76	53	68	3.91	2.83	3.53	2.42	3.44	0.39	3.91	0
hsa05213	Endometrial cancer	Cancers	hsa04010,hsa04012,hsa04060,hsa04110,hsa04115,hsa04310,hsa04520	53	37	45	-2.99	2.58	3.26	1.47	3.17	0	3.26	0
hsa05214	Glioma	Cancers	hsa04010,hsa04012,hsa04020,hsa04060,hsa04110,hsa04115,hsa04150	68	43	51	3.21	2.89	3.47	1.89	3.39	0.62	3.47	0
hsa05215	Prostate cancer	Cancers	hsa00150,hsa04010,hsa04060,hsa04110,hsa04115,hsa04210	91	53	62	2.7	1.66	2.98	1.61	2.96	0	2.98	1
hsa05216	Thyroid cancer	Cancers	hsa03320,hsa04010,hsa04115,hsa04310,hsa04520	30	17	22	-3.3	1.4	3.05	1.54	3.88	0	3.88	0
hsa05217	Basal cell carcinoma	Cancers	hsa04110,hsa04115,hsa04310,hsa04340,hsa04350	58	30	34	2.85	2.6	2.32	0.37	2.82	0	2.85	0
hsa05218	Melanoma	Cancers	hsa04010,hsa04110,hsa04115,hsa04210,hsa04520,hsa04916	71	40	50	2.83	1.61	3.34	1.44	2.87	1.49	3.34	0
hsa05219	Bladder cancer	Cancers	hsa04010,hsa04012,hsa04110,hsa04115,hsa04370,hsa04520	43	27	32	2.58	1.45	2.3	0.51	3.36	1.1	3.36	0
hsa05220	Chronic myeloid leukemia	Cancers	hsa04010,hsa04110,hsa04115,hsa04210,hsa04350,hsa04640	74	54	65	3.21	2.27	3.65	1.85	3.25	0.48	3.65	0
hsa05221	Acute myeloid leukemia	Cancers	hsa04010,hsa04110,hsa04150,hsa04210,hsa04630,hsa04640	54	40	51	3.61	2.48	3.47	1.67	3.94	0	3.94	0
hsa05222	Small cell lung cancer	Cancers	hsa04110,hsa04115,hsa04210,hsa04510,hsa04512	91	60	71	2.04	2.14	2.9	1.31	3.46	0	3.46	2
hsa05223	Non-small cell lung cancer	Cancers	hsa04010,hsa04012,hsa04110,hsa04115,hsa04210	60	36	44	2.87	2.18	2.8	1.56	3.23	0	3.23	0
hsa94660	T cell receptor signaling pathway with Antigen Processing	Infectious Disease		118	80	89	2.47	2.69	3.32	2.15	3.29	0.68	3.32	0
hsa99020	Lectin Induced Complement Pathway	Infectious Diseases		12	7	7	1.61	-0.51	1.8	1.21	-1.38	-0.33	1.8	2
hsa99100	Activation of Csk through the T-Cell Receptor pathway	Infectious Diseases		12	10	11	1.1	1.94	-2.79	2.02	3.2	0	3.2	0
hsa99101	Activation of cAMP-dependent protein kinase PKA pathway	Infectious Diseases		6	6	6	1.93	3.16	2.34	3.7	3.99	0.44	3.99	0
hsa99102	Anthrax Toxin Mechanism of Action pathway	Infectious Diseases		3	2	2	-0.2	0	1.02	1.4	1.91	0	1.91	0
hsa99103	Apoptotic DNA fragmentation and tissue homeostasis pathway	Immune System		8	7	8	-0.64	0.25	1.86	0.67	1.28	0.9	1.86	2
hsa99104	Apoptotic Signaling in Response to DNA Damage pathway	Immune System		19	16	19	-3.68	-1.57	-3.09	2.19	2.09	0.94	-3.68	1
hsa99105	BRC signaling pathway	Immune System		24	20	23	3.03	2.83	2.9	2.03	3.65	0	3.65	0
hsa99106	B Cell Receptor Complex pathway	Immune System		3	2	2	-1.47	-1.17	-1.23	1.72	2.02	0.58	2.02	0
hsa99107	B Lymphocyte Cell Surface Molecules pathway	Infectious Diseases		12	7	10	0	-0.69	0.64	1.75	2.42	0.42	2.42	0
hsa99108	Blockade of Neurotransmitter Relase by Botulinum Toxin pathway	Infectious Diseases		4	2	2	0	0.04	0	0	0.83	0	0.83	0
hsa99109	CCR3 signaling in Eosinophils pathway	Infectious Diseases		22	18	20	3.76	3.26	4.98	3.09	3.51	1.24	4.98	0
hsa99110	CD40L Signaling Pathway	Infectious Diseases		14	12	14	1.38	-1.28	1.44	0.73	2.2	0.82	2.2	0
hsa99111	Calcium Signaling by HBx of Hepatitis B virus pathway	Infectious Diseases		6	5	5	1.85	1.58	1.25	1.1	2.59	-0.11	2.59	0
hsa99112	Cytokine Inflammatory Response	Infectious Diseases		38	22	23	1.88	0.45	2.26	0.23	1.3	3.46	3.46	0
hsa99113	Trefoil Factors Initiate Mucosal Healing	Infectious Diseases		22	18	21	3.86	1.7	2.97	1.62	3.12	0	3.86	1
hsa99114	Mechanisms_of_transcptional_repression_by_DNA_methylation	Infectious Diseases		14	11	11	-2.9	2.35	1.65	0.84	3.18	0	3.18	0
